# Supplementary material for: Genome-wide CRISPRi screening identifies OCIAD1 as a prohibitin client and regulatory determinant of mitochondrial Complex III assembly in human cells
Source: eLife. 2021 May 26;10:e67624. doi: 10.7554/eLife.67624 (PMC8154037; doi:10.7554/eLife.67624)
Supplement: Figure 4—source data 1. [file elife-67624-fig4-data1.xlsx]

## Sheet: Rescue vs OCIAD1sgRNA#2
Genes	log2FC	AveExpr	t	P.Value	adj.P.Val	-LOG10(adj.P.value)
C1QBP	6.73951	18.9002	28.3524	2.05e-07	0.000146113	3.83531
MRPS14	5.1989	18.1299	21.6534	9.59e-07	0.000341353	3.4668
CYC1	5.17191	18.1164	17.786	2.94e-06	0.00052308	3.28143
SAMM50	4.49321	18.7249	6.13289	0.000996736	0.0133901	1.87322
MRPL17	4.3538	18.881	4.78658	0.00338511	0.0282689	1.54869
SLC25A12	4.21858	17.6397	15.4791	6.45e-06	0.000656476	3.18278
NDUFAF2	4.16359	18.6908	4.48765	0.00458245	0.0347096	1.45955
COX5A	4.14884	18.8461	3.56072	0.0127382	0.0657219	1.18229
BAX	4.07151	18.6368	4.00444	0.00768277	0.0511227	1.29139
DNAJA3	3.98564	17.5233	14.4641	9.46e-06	0.000842078	3.07465
MRPL18	3.92618	18.9032	3.03612	0.024086	0.0983166	1.00737
RHOT1	3.91886	18.5002	3.79058	0.00976587	0.0575545	1.23992
IMMP2L	3.88173	17.4713	15.5346	6.32e-06	0.000656476	3.18278
MAIP1	3.87759	17.4693	12.8419	1.85e-05	0.00101064	2.9954
MTHFD2	3.70195	17.3814	13.1551	1.61e-05	0.000968142	3.01406
MRPS35	3.70082	18.7447	2.95382	0.0267176	0.102339	0.989961
MRPS18B	3.50764	18.9957	2.41786	0.0536702	0.159742	0.796581
PTCD3	3.50761	17.2843	10.7844	4.88e-05	0.00182716	2.73822
MFN1	3.5021	18.6317	2.75397	0.0345054	0.118552	0.92609
TIMM10	3.43963	17.2503	14.1576	1.07e-05	0.000844436	3.07343
CYB5R3	3.40756	18.4379	3.04621	0.0237833	0.0978827	1.00929
DNAJC19	3.40186	17.2314	8.48132	0.000181271	0.00391106	2.40771
CHCHD3	3.39512	17.5329	8.11984	0.000229113	0.0047979	2.31895
TIMM44	3.39424	17.7606	6.55102	0.000710451	0.0109965	1.95874
RMDN1	3.37582	17.2184	12.1367	2.53e-05	0.0011258	2.94854
SNAP29	3.31896	18.177	3.51158	0.0134972	0.0681169	1.16674
PTGES2	3.28882	17.1749	12.2463	2.41e-05	0.0011258	2.94854
MRPL34	3.25919	17.734	6.0163	0.00109893	0.0137269	1.86243
MRPL37	3.23228	17.1466	13.4962	1.4e-05	0.000968142	3.01406
UQCRQ	3.23213	17.1465	11.9376	2.77e-05	0.00116194	2.93482
MRPL57	3.2129	18.1038	3.8268	0.00937229	0.0570348	1.24386
MTFR1L	3.20134	17.7529	4.84171	0.00320553	0.0281063	1.5512
APOO	3.13327	17.0971	13.127	1.63e-05	0.000968142	3.01406
HSPB1	3.10219	19.0432	1.74005	0.1345	0.275184	0.560377
TIMM50	3.09121	18.9111	3.68558	0.011015	0.0622436	1.20591
CCDC51	3.0825	18.0254	3.71735	0.0106191	0.0604862	1.21834
TIMM29	3.03548	18.139	3.22494	0.0190585	0.0880399	1.05532
VWA8	3.03538	17.936	3.91701	0.00846734	0.0534982	1.27166
MRPL47	2.95289	19.8866	2.40091	0.0548978	0.161517	0.791781
CS	2.92559	16.9933	12.2177	2.44e-05	0.0011258	2.94854
GPD2	2.92084	19.5239	2.49586	0.0483843	0.151095	0.820751
MRPL20	2.90874	17.5949	4.4556	0.00473717	0.0355038	1.44972
HINT2	2.87017	16.9655	9.1394	0.000120918	0.00318865	2.49639
MRPL48	2.8659	18.3454	4.52972	0.00438791	0.0339586	1.46905
UQCRB	2.83252	16.9467	10.2642	6.4e-05	0.00217156	2.66323
FDXR	2.82394	17.7246	3.63177	0.0117236	0.0638155	1.19507
CLIC1	2.82193	18.3131	2.23943	0.0681851	0.178484	0.7484
NDUFB6	2.81876	19.3074	2.24239	0.0679134	0.178429	0.748534
BCKDHA	2.81654	16.9387	11.0152	4.34e-05	0.00171541	2.76563
IDH3A	2.8154	17.9783	2.84938	0.030518	0.113171	0.946266
TOMM40	2.79902	17.4512	5.60124	0.00157435	0.0160522	1.79447
MRPS27	2.79831	19.8648	2.09898	0.0824652	0.20108	0.696632
TOMM70	2.75013	19.4901	2.21635	0.0703431	0.180671	0.743111
COX6B1	2.74349	18.2725	2.56029	0.0444355	0.142514	0.846143
TOMM20	2.73887	18.0972	2.4524	0.051258	0.15399	0.812507
PDHA1	2.73639	17.9968	2.82256	0.0315859	0.114201	0.942331
ALDH4A1	2.71612	17.4907	4.19474	0.00624231	0.0431507	1.36501
MRPL15	2.71068	17.5998	3.75145	0.0102118	0.0591122	1.22832
SFXN2	2.70606	17.4573	5.05471	0.00260671	0.0234934	1.62905
FKBP8	2.68693	17.8794	2.5775	0.04344	0.14105	0.850627
MRPS15	2.67702	17.7635	3.08492	0.0226602	0.0960362	1.01756
ARMCX3	2.66663	17.3014	5.78664	0.00133759	0.0149704	1.82477
ENDOG	2.64328	20.0661	1.7985	0.124197	0.262856	0.580282
YARS2	2.61583	19.1249	2.64255	0.0398868	0.13209	0.879129
ACADM	2.6128	20.1952	1.75324	0.132104	0.272697	0.56432
MRPS36	2.5885	16.8247	10.3185	6.22e-05	0.00217156	2.66323
AK4	2.58033	17.3153	5.39365	0.00189849	0.0182613	1.73847
SCCPDH	2.56909	16.815	8.552	0.000173331	0.00385662	2.41379
GCAT	2.55883	17.6117	3.63999	0.0116121	0.0638155	1.19507
ATAD3B	2.54407	20.574	3.85835	0.00904402	0.0555115	1.25562
RAN	2.52319	22.2398	1.10273	0.314026	0.453522	0.343402
OGDH	2.49689	20.4409	1.52743	0.179483	0.324345	0.488992
BCS1L	2.4696	17.2893	4.30042	0.00557543	0.0396844	1.40138
HSPE1	2.46936	20.6512	1.41679	0.208229	0.355538	0.449114
NDUFA7	2.4539	20.3147	1.62199	0.157927	0.302268	0.519608
MRM2	2.43645	16.7487	9.83217	8.11e-05	0.00240662	2.61859
COX4I1	2.42714	16.744	6.47681	0.000753503	0.011177	1.95168
NDUFA4	2.41393	17.6087	3.60708	0.0120656	0.0638155	1.19507
SLC30A9	2.40327	18.4935	2.79013	0.0329313	0.115503	0.937407
GFM1	2.39981	17.7417	2.4357	0.0524096	0.156789	0.804686
MRPS31	2.39019	19.4914	2.02633	0.0910286	0.213902	0.669785
DAP3	2.37987	17.4069	3.13313	0.0213421	0.0937999	1.0278
MRPS34	2.33732	18.3938	2.92372	0.0277572	0.105685	0.975986
DLST	2.2815	17.7316	3.536	0.013114	0.0666943	1.17591
HADHB	2.25373	20.5564	7.89893	0.000265555	0.00525208	2.27967
ABCB8	2.24968	18.3739	2.46821	0.0501919	0.153374	0.814247
STT3B	2.24762	16.6543	8.75718	0.000152478	0.00366037	2.43647
PCCA	2.24528	17.2447	4.69828	0.0036971	0.0295768	1.52905
OAT	2.22817	16.6445	7.41671	0.000371161	0.00646778	2.18924
SUPT16H	2.21821	18.1391	1.8848	0.110402	0.246414	0.608334
STOM	2.20483	17.7455	2.50467	0.0478232	0.15	0.823907
SLC25A24	2.17891	18.4598	2.57269	0.0437159	0.14105	0.850627
CCDC58	2.17751	20.6563	2.73975	0.0351467	0.119734	0.921782
PDK1	2.16564	16.6133	8.80615	0.000147941	0.00366037	2.43647
ECHS1	2.16546	18.9309	2.07311	0.0854162	0.204769	0.688736
HADH	2.13222	18.5669	2.35143	0.0586528	0.165717	0.780632
PITRM1	2.11534	18.2678	2.45395	0.0511523	0.15399	0.812507
RAB7A	2.0972	18.2403	2.83588	0.0310505	0.113374	0.945486
BCKDK	2.09641	16.7377	9.56903	9.41e-05	0.00268037	2.5718
APOOL	2.0808	20.5587	7.60738	0.000324446	0.00607909	2.21616
PCCB	2.06969	18.348	2.36246	0.057793	0.165717	0.780632
RAB14	2.0695	17.2774	3.22035	0.019166	0.0880399	1.05532
NCLN	2.04653	17.6605	2.3756	0.0567858	0.165253	0.78185
IMMT	2.0425	22.5299	6.95767	0.000519419	0.00840514	2.07546
DECR1	2.01692	16.5389	5.96918	0.00114361	0.0137923	1.86036
PPIG	2.01225	18.7511	1.8654	0.113364	0.250236	0.60165
ALDH6A1	2.00645	17.8509	2.96144	0.0264612	0.102339	0.989961
SCO1	1.99185	22.0815	5.95027	0.00116212	0.0137923	1.86036
RAB1A	1.96862	16.8023	7.49046	0.000352223	0.00643032	2.19177
ACADS	1.96756	17.0367	3.38672	0.0156618	0.0753458	1.12294
MRPL4	1.94846	17.2505	2.09277	0.0831639	0.202091	0.694453
PHB2	1.94558	27.2872	7.16158	0.000446406	0.00739166	2.13126
PRDX3	1.94235	19.2674	1.63375	0.155426	0.300066	0.522783
MRPL49	1.93813	17.574	3.43596	0.0147653	0.0729674	1.13687
MRPS9	1.93011	18.9091	1.84174	0.117082	0.254193	0.594837
GFER	1.90632	16.4836	6.39452	0.000804794	0.0116942	1.93203
NDUFB10	1.90528	18.6758	1.8394	0.117457	0.254193	0.594837
OXCT1	1.88659	17.6545	3.33663	0.0166359	0.0789653	1.10256
TIMM10B	1.8724	16.4667	5.77893	0.00134658	0.0149704	1.82477
PARP2	1.85366	17.6242	1.84068	0.117252	0.254193	0.594837
FLOT2	1.85276	22.6124	3.53634	0.0131087	0.0666943	1.17591
AIFM1	1.83753	22.0258	6.07034	0.00105014	0.0133963	1.87302
MRPL51	1.82093	16.4409	5.64796	0.00151043	0.0160522	1.79447
TIMM13	1.81477	20.8388	2.75557	0.0344343	0.118552	0.92609
COX7A2	1.80885	17.8924	2.26032	0.0662916	0.176118	0.754196
NDUFB1	1.80671	19.5922	2.32874	0.0604644	0.167365	0.776334
RAB10	1.78984	17.118	3.96434	0.00803201	0.0519945	1.28404
DNAJC11	1.7868	20.9715	4.32437	0.00543573	0.0395989	1.40232
OPA1	1.78558	23.8404	4.79259	0.00336499	0.0282689	1.54869
RPL10	1.78162	19.7918	1.34138	0.230204	0.37336	0.427872
RSL1D1	1.7702	18.0559	2.16838	0.0750586	0.18884	0.723906
LAP3	1.76909	16.7134	4.32182	0.00545041	0.0395989	1.40232
NDUFA8	1.75757	18.6082	1.84399	0.116723	0.254193	0.594837
TMEM109	1.75011	18.9083	1.62505	0.157271	0.301825	0.520245
HADHA	1.74754	24.1119	6.06636	0.00105364	0.0133963	1.87302
PHB	1.74742	27.2859	5.79099	0.00133256	0.0149704	1.82477
FLOT1	1.74681	21.4184	3.49661	0.0137383	0.0684033	1.16492
PCMT1	1.72804	17.7579	1.61826	0.158728	0.302988	0.518574
ATAD3A	1.72034	24.5425	3.96424	0.00803285	0.0519945	1.28404
ECI2	1.71628	17.1868	2.23107	0.0689589	0.1793	0.746419
PTPN1	1.69536	17.0995	2.21869	0.0701214	0.180671	0.743111
MRPL22	1.68215	17.7864	2.08992	0.0834873	0.202187	0.694247
EIF4ENIF1	1.67709	16.369	3.06343	0.0232764	0.0969069	1.01365
MRPS21	1.66587	18.142	2.15759	0.0761629	0.190274	0.720622
PAM16	1.66524	18.7723	3.50609	0.0135851	0.0681169	1.16674
LETM1	1.64653	19.642	5.44366	0.00181393	0.0181904	1.74016
SPTBN1	1.63841	16.3497	4.76055	0.00347383	0.0284295	1.54623
HP1BP3	1.61657	17.8155	1.34976	0.227663	0.371588	0.429939
ARMC1	1.6147	19.0716	1.26168	0.255692	0.397495	0.400668
NDUFV2	1.60536	19.4529	1.17889	0.284785	0.426999	0.369573
AFG3L2	1.60303	23.2231	6.10122	0.00102337	0.0133963	1.87302
ABCB10	1.59309	16.327	6.30268	0.000866867	0.0123158	1.90954
MFN2	1.58972	20.3831	2.80277	0.0323996	0.114201	0.942331
MRPL9	1.58456	19.5713	5.13224	0.00242127	0.0221018	1.65557
COX5B	1.58365	19.1809	4.11373	0.00681464	0.0462098	1.33527
LARS2	1.58312	17.8622	1.96772	0.0985958	0.227923	0.642212
MRPS10	1.58199	18.133	2.80382	0.0323559	0.114201	0.942331
MRPL55	1.57939	18.2689	1.64323	0.153439	0.299311	0.523877
OCIAD1	1.56132	25.9759	6.2566	0.000900074	0.0123241	1.90925
DTYMK	1.55901	17.662	2.1349	0.0785415	0.194172	0.711814
YME1L1	1.55747	22.159	2.51448	0.0472061	0.149381	0.825704
PNPT1	1.55665	18.3996	3.60465	0.0120999	0.0638155	1.19507
CEPT1	1.54845	18.6202	1.66665	0.148633	0.293148	0.532913
ATP5PD	1.54444	20.973	4.29135	0.00562939	0.0396844	1.40138
ATP5MG	1.54089	20.5037	5.64143	0.00151918	0.0160522	1.79447
ALDH1B1	1.53789	17.2291	3.15561	0.0207563	0.0918365	1.03698
SPG7	1.51756	21.1551	6.51039	0.00073366	0.0111142	1.95412
MRPL2	1.51609	20.2992	3.4306	0.0148599	0.0729674	1.13687
VDAC1	1.48376	21.0131	2.70798	0.0366257	0.12359	0.908017
DNM1L	1.48354	23.3626	3.08839	0.0225623	0.0960362	1.01756
SLC25A13	1.45643	20.9709	5.62132	0.0015465	0.0160522	1.79447
AK2	1.45112	23.074	4.37665	0.00514436	0.038154	1.41846
SDHA	1.44655	20.0271	3.61437	0.0119635	0.0638155	1.19507
CSN1S2	1.44101	18.8369	1.05741	0.332595	0.474565	0.323704
SAP30BP	1.43756	19.9373	0.980892	0.365987	0.503056	0.298384
SLC25A11	1.43324	17.7454	2.35161	0.0586392	0.165717	0.780632
SUPV3L1	1.43315	17.5854	2.34792	0.0589298	0.165785	0.780456
ATP5ME	1.42268	21.9828	3.16392	0.0205443	0.0918365	1.03698
MRPL13	1.41785	20.6813	2.95824	0.0265686	0.102339	0.989961
NDUFA5	1.41543	18.651	1.32393	0.235581	0.38024	0.419942
DDX50	1.41293	16.2369	3.37844	0.0158183	0.0755879	1.12155
NNT	1.4037	19.1618	5.36546	0.00194816	0.0182613	1.73847
MTHFD1L	1.40044	18.6359	1.24987	0.259676	0.398469	0.399606
PMPCB	1.38609	17.9812	1.58666	0.165673	0.311686	0.506283
MRPL27	1.37714	20.8537	4.58902	0.0041294	0.0323091	1.49067
NOP58	1.37422	18.8722	1.1658	0.289638	0.432332	0.364183
MT-CO2	1.37284	21.5751	3.4034	0.0153514	0.0748645	1.12572
LASP1	1.35735	19.3753	0.998923	0.357884	0.497683	0.303047
RHOT2	1.35654	20.0106	2.29452	0.0633088	0.172045	0.764357
NSDHL	1.34804	16.2045	5.36486	0.00194923	0.0182613	1.73847
PDE12	1.33678	18.6752	1.24581	0.261056	0.399725	0.398239
GCDH	1.33358	18.5894	3.10872	0.0219986	0.0949274	1.02261
ETFB	1.33282	20.2371	4.85019	0.00317886	0.0281063	1.5512
PAFAH1B3	1.32941	18.6967	1.12573	0.304937	0.444908	0.35173
TRAP1	1.32726	22.5773	4.49909	0.00452856	0.0346702	1.46004
UBXN1	1.31535	16.9713	1.9617	0.0994082	0.228318	0.64146
NIPSNAP1	1.31311	20.2921	4.09698	0.00694018	0.0466171	1.33145
VIM	1.3012	19.5885	0.872396	0.41783	0.546866	0.262119
MRPL45	1.29831	20.1302	2.57156	0.043781	0.14105	0.850627
SMN2	1.28403	20.0221	0.7498	0.48283	0.592715	0.227154
MRPL23	1.27273	20.6756	3.90825	0.00855074	0.0534982	1.27166
MRPL39	1.26785	20.1641	3.63648	0.0116595	0.0638155	1.19507
CDC42EP1	1.2457	17.6275	1.81199	0.121933	0.26071	0.583843
SDF2L1	1.23736	16.5329	3.1607	0.0206261	0.0918365	1.03698
PPOX	1.23323	17.848	1.30201	0.242497	0.381213	0.418832
ATP5F1C	1.23188	21.8801	5.37053	0.00193913	0.0182613	1.73847
MRPL11	1.22764	21.3841	3.60561	0.0120863	0.0638155	1.19507
MRPL41	1.22283	22.1867	3.61253	0.0119892	0.0638155	1.19507
UQCRC1	1.22245	22.4268	2.17739	0.074148	0.187211	0.72767
ABCF1	1.20618	16.8464	1.65465	0.151076	0.297143	0.527034
MRPS23	1.2021	19.5864	3.78921	0.00978104	0.0575545	1.23992
PLIN3	1.19979	18.3313	1.27087	0.25263	0.394458	0.403999
MRPL24	1.19316	19.9091	3.94082	0.0082451	0.0528875	1.27665
HSD17B12	1.1907	18.3012	1.32187	0.236224	0.38024	0.419942
GADD45GIP1	1.19065	21.0968	2.81984	0.0316964	0.114201	0.942331
CDK1	1.1891	18.2806	1.31007	0.239931	0.380639	0.419487
DBN1	1.18703	16.7028	1.11499	0.30915	0.449214	0.347547
HTRA2	1.18547	21.0465	2.99575	0.0253396	0.101358	0.994141
CLPB	1.18176	18.7181	1.05033	0.335577	0.477862	0.320697
SLC25A6	1.17782	18.326	3.722	0.0105625	0.0604862	1.21834
PSMD6	1.17712	19.5492	0.811572	0.449228	0.569875	0.244221
UQCRC2	1.17587	21.2121	3.24776	0.0185336	0.0868152	1.0614
SUCLG2	1.17271	16.6148	2.75111	0.0346333	0.118552	0.92609
BUB3	1.1719	19.766	0.797365	0.456804	0.572613	0.242139
LONP1	1.16421	18.9609	2.36761	0.057396	0.165717	0.780632
CFL1	1.15271	18.1459	1.23757	0.263884	0.401465	0.396352
ATP5PO	1.14914	23.4328	3.00429	0.0250685	0.100841	0.996365
VDAC2	1.14737	23.4112	3.15522	0.0207664	0.0918365	1.03698
VDAC3	1.13817	20.583	3.10076	0.0222174	0.0952941	1.02093
SLC12A2	1.12747	17.4682	1.76367	0.130239	0.270351	0.568072
SUB1	1.1265	17.3623	0.939801	0.384996	0.514291	0.288791
TFB1M	1.12437	18.8148	0.899639	0.404312	0.53607	0.270778
PDIA4	1.11853	19.4158	0.793928	0.458651	0.573918	0.24115
CANX	1.11755	17.0913	1.44486	0.200556	0.34535	0.46174
SART3	1.094	17.7439	1.06827	0.328062	0.469981	0.32792
SHMT2	1.09042	22.1856	2.30291	0.0625984	0.171423	0.76593
ACO2	1.09029	20.9942	2.88951	0.0289922	0.108645	0.963992
SRRT	1.08945	20.6387	0.580472	0.583548	0.674065	0.171298
FSCN1	1.08685	18.2861	1.14388	0.297922	0.437695	0.358829
ATP5F1B	1.08589	24.754	3.0157	0.0247114	0.0999689	1.00014
SFXN1	1.07891	20.2171	3.8047	0.00961028	0.0575545	1.23992
RCC2	1.07212	19.3082	0.815272	0.44727	0.568672	0.245138
STOML2	1.07118	21.9251	3.39297	0.0155447	0.0752913	1.12326
NFS1	1.06931	16.6512	1.61504	0.159423	0.303501	0.51784
MRPL12	1.05994	19.339	4.67018	0.00380314	0.0300871	1.52162
PYCR1	1.04535	21.1704	2.29494	0.0632732	0.172045	0.764357
SARNP	1.0447	19.6635	0.731418	0.493159	0.603315	0.219456
NDUFA13	1.04365	22.3528	2.15181	0.0767621	0.1911	0.718739
TUBB6	1.03368	17.9772	1.03685	0.341314	0.482173	0.316797
NDUFS3	1.03244	20.5947	3.76027	0.0101094	0.0589989	1.22916
TSFM	1.01468	20.1682	2.19062	0.0728331	0.185204	0.732349
CTPS1	1.01266	18.6286	0.888565	0.409766	0.540148	0.267488
TIMM8A	1.00375	17.6548	1.017	0.349906	0.49042	0.309432
MRPS22	1.00098	19.3571	3.30222	0.017344	0.0817808	1.08735
RAB5A	0.999285	18.0561	4.30042	0.00557544	0.0396844	1.40138
MRPS11	0.99906	18.0579	3.97328	0.00795262	0.0519945	1.28404
EPB41	0.989193	18.0303	1.14743	0.296568	0.437177	0.359343
ATP5F1A	0.985361	23.5106	3.19903	0.0196744	0.089224	1.04952
CKB	0.966066	19.5677	0.642649	0.545137	0.649059	0.187716
MRPL14	0.965652	19.3985	3.0638	0.0232658	0.0969069	1.01365
ACAA2	0.958696	18.03	3.79727	0.0096918	0.0575545	1.23992
IARS2	0.95535	20.9975	2.06611	0.0862326	0.206032	0.686065
PYCR2	0.951609	19.237	2.81086	0.0320645	0.114201	0.942331
MFAP1	0.950955	16.0264	2.38986	0.0557134	0.163243	0.787166
PSMA5	0.947538	18.6171	0.843607	0.432482	0.55683	0.254277
RPLP1	0.939185	19.216	0.631816	0.551713	0.652524	0.185403
KIAA1143	0.936389	16.9368	1.37746	0.21944	0.362509	0.440681
SLC25A46	0.932057	16.9597	0.859734	0.424228	0.552194	0.257908
IDH3B	0.903842	19.3938	2.59569	0.0424137	0.139164	0.856473
HK1	0.901857	19.3713	2.14115	0.0778788	0.193205	0.713983
PDHB	0.893378	20.4793	3.56666	0.0126499	0.0657219	1.18229
RAB5C	0.889844	16.9664	1.87031	0.112606	0.249768	0.602464
NDUFS2	0.880116	21.1768	3.57099	0.0125858	0.0657219	1.18229
POLR1D	0.875439	17.5846	1.02994	0.344284	0.485406	0.313895
HSPA9	0.871741	24.0468	3.6302	0.011745	0.0638155	1.19507
CLN6	0.870368	18.3135	0.95528	0.377746	0.511322	0.291306
SLC25A10	0.866571	17.5643	1.36905	0.221907	0.365735	0.436833
RPL10A	0.861186	18.2682	0.887633	0.410227	0.540148	0.267488
TALDO1	0.852909	18.5132	0.764823	0.4745	0.587554	0.230952
SUPT5H	0.845604	17.9415	0.969597	0.371136	0.507141	0.294871
ALDH18A1	0.841006	21.5498	1.04745	0.336796	0.478641	0.31999
MRPL50	0.840062	20.9994	3.06146	0.0233336	0.0969069	1.01365
ATP5MF	0.818219	18.3414	1.41323	0.209222	0.3561	0.448428
MDH2	0.817106	22.8091	1.25699	0.257268	0.397753	0.400386
FH	0.813754	20.9209	2.25276	0.0669699	0.177259	0.751392
PFKM	0.808622	17.8473	1.08925	0.319454	0.459498	0.337717
ACAT1	0.803668	19.9681	1.85603	0.114822	0.251549	0.599377
EXOC7	0.793365	16.198	1.71759	0.138678	0.280508	0.552055
RBM27	0.784748	18.2233	0.733951	0.491727	0.602598	0.219972
CLPX	0.783485	19.527	1.31731	0.23765	0.38024	0.419942
SAFB	0.781635	18.8923	0.617988	0.560179	0.656984	0.182445
HSD17B10	0.771815	21.663	2.72758	0.0357053	0.121058	0.917007
TARS2	0.763679	19.4166	2.492	0.0486324	0.151206	0.82043
RCC1L	0.758097	18.1156	0.724056	0.497339	0.604414	0.218665
ETFA	0.751255	20.2887	2.89684	0.0287225	0.108443	0.964799
MRPS28	0.749398	21.2116	1.63334	0.155512	0.300066	0.522783
NDUFA10	0.741066	20.6871	2.60554	0.0418684	0.138011	0.860088
SIRT2	0.72848	15.8947	1.75307	0.132135	0.272697	0.56432
EMC4	0.727091	17.5076	1.16836	0.288681	0.431809	0.364709
KIF4A	0.716121	17.676	0.870061	0.419004	0.547396	0.261698
RTF1	0.708338	17.4364	0.652658	0.539105	0.644032	0.191093
CHRAC1	0.70088	17.856	0.716057	0.501907	0.608787	0.215535
AARS2	0.692294	19.2698	1.669	0.148158	0.293024	0.533097
FOXRED1	0.689232	20.4504	2.66506	0.0387312	0.129468	0.887839
PC	0.689191	21.0643	1.72378	0.137515	0.280508	0.552055
SLC25A5	0.684683	19.8425	2.67563	0.0382006	0.128296	0.891786
PRDX5	0.671616	19.4937	1.45863	0.196886	0.342746	0.465028
EIF4G2	0.669655	17.9149	0.679714	0.523016	0.630098	0.200592
MCCC2	0.668672	19.8687	1.56935	0.169601	0.314468	0.502423
H1-10	0.660769	16.806	0.819402	0.445092	0.567931	0.245704
PGD	0.657986	17.8748	0.756234	0.47925	0.591658	0.227929
HSD17B8	0.650776	19.3638	2.48607	0.0490165	0.151679	0.819075
PCK2	0.650436	21.8038	1.34842	0.228067	0.371588	0.429939
ACADVL	0.650158	19.1615	1.79876	0.124154	0.262856	0.580282
SRSF10	0.640911	17.8097	0.666325	0.530939	0.636412	0.196262
DIS3	0.634321	19.0081	0.482351	0.647316	0.722397	0.141224
NDUFB4	0.633577	22.4296	1.94185	0.102135	0.231594	0.635273
HSPD1	0.633198	24.0227	1.38141	0.21829	0.362053	0.441228
CHCHD1	0.626886	17.129	0.55822	0.597681	0.683642	0.165171
EHD1	0.624706	17.8769	0.790636	0.460424	0.575126	0.240237
NDUFS7	0.622615	21.0449	2.00674	0.0934896	0.217531	0.662478
RBM7	0.621818	17.4581	0.449065	0.669765	0.738193	0.13183
SF3A3	0.604919	18.149	0.601028	0.570672	0.662835	0.178594
ERP29	0.593535	19.7178	1.2388	0.263459	0.401465	0.396352
GTF3C3	0.588658	16.6833	0.876206	0.415919	0.545367	0.263311
PRRC2A	0.580077	18.404	0.574884	0.587079	0.675283	0.170514
ACIN1	0.575821	17.1875	0.464221	0.659495	0.732544	0.135167
SCAMP3	0.557282	19.448	1.60413	0.161797	0.306382	0.513737
RPL11	0.555613	22.6565	2.12845	0.0792319	0.194528	0.711018
UBR5	0.551139	17.8598	0.616622	0.56102	0.656984	0.182445
PGAM5	0.547473	20.3538	0.957212	0.376849	0.511079	0.291512
COPG1	0.544749	17.599	0.693451	0.514969	0.62251	0.205854
SLC2A1	0.54437	18.1054	0.58438	0.581087	0.672738	0.172154
TOP1MT	0.535504	17.13	0.458681	0.66324	0.735556	0.133384
HUWE1	0.521383	17.6917	0.635989	0.549174	0.652524	0.185403
MRPL28	0.516371	18.551	2.22518	0.0695094	0.179966	0.744809
RSRC1	0.510278	16.6194	0.604913	0.568258	0.66111	0.179726
RRBP1	0.501282	17.3534	0.62799	0.554047	0.654198	0.184291
BOLA2B	0.49483	17.9624	1.14329	0.298149	0.437695	0.358829
IGF2BP2	0.488864	16.8738	0.531682	0.614792	0.699252	0.155366
DHX30	0.467787	21.4635	0.851348	0.428505	0.555146	0.255593
IPO4	0.444957	17.6881	0.451993	0.667775	0.737394	0.132301
EDC4	0.431616	18.0166	0.451656	0.668004	0.737394	0.132301
NSUN2	0.431422	17.9183	0.502974	0.633609	0.716078	0.14504
GTF2I	0.415847	17.3328	0.554114	0.60031	0.684969	0.164329
TFIP11	0.398804	17.8224	0.36935	0.725047	0.778633	0.108667
RPL23	0.367172	21.4289	1.6338	0.155415	0.300066	0.522783
RPS20	0.355667	18.1856	0.359213	0.73222	0.783971	0.1057
RPL15	0.347661	19.9073	1.1872	0.28174	0.4241	0.372532
CRKL	0.335954	17.6045	0.383159	0.715327	0.773771	0.111388
RPS4X	0.326879	20.3086	1.48044	0.191205	0.336142	0.473477
RBM4	0.309378	17.0047	0.402576	0.701757	0.762826	0.117575
NDUFS1	0.295389	21.7277	1.39621	0.214029	0.360257	0.443388
TUFM	0.295047	23.7331	1.16372	0.290415	0.432585	0.363928
PCM1	0.293443	17.8598	0.275357	0.792641	0.838574	0.0764585
NDUFA12	0.289056	21.7412	1.34398	0.229413	0.372928	0.428375
LRPPRC	0.276953	21.9503	0.806116	0.452127	0.57077	0.243539
COLGALT1	0.266032	17.6862	0.325037	0.75662	0.805252	0.0940684
MCCC1	0.254208	18.4378	0.752621	0.481258	0.591806	0.22782
ANAPC1	0.252624	18.2609	0.227557	0.827843	0.865527	0.0627192
PSME3	0.2388	17.3953	0.264977	0.800243	0.844108	0.0736019
NECAP2	0.232597	18.9048	0.511695	0.627859	0.712975	0.146925
RPS15A	0.231417	23.5421	0.992187	0.360894	0.498945	0.301947
RPL21	0.228001	23.4286	0.949038	0.380657	0.513905	0.289117
PRPF8	0.215842	18.8466	0.152597	0.883914	0.909461	0.041216
SF3A1	0.213717	19.4534	0.30572	0.770552	0.816506	0.0880407
ESYT1	0.199655	19.0566	0.399237	0.704082	0.764186	0.116801
RPL27A	0.187968	24.093	0.785129	0.463402	0.577832	0.238198
JPT2	0.185889	18.5763	0.634485	0.550088	0.652524	0.185403
RPS16	0.18164	23.1451	0.780427	0.465955	0.578988	0.237331
NUMA1	0.1405	18.2072	0.131163	0.900102	0.92478	0.0339617
PSMD5	0.136398	18.8016	0.492031	0.640863	0.718574	0.143529
RPA3	0.134106	17.0029	0.242809	0.816558	0.854984	0.0680419
RPL22	0.133321	22.9848	0.504437	0.632642	0.716078	0.14504
HNRNPUL2	0.132033	19.9351	0.214161	0.837792	0.87018	0.0603911
RPL9P8	0.117369	23.5188	0.494827	0.639005	0.71762	0.144105
RPL3	0.107481	20.8551	0.370885	0.723965	0.778633	0.108667
RPS14	0.107176	22.9305	0.49933	0.636019	0.71762	0.144105
MCM2	0.104734	20.5679	0.344066	0.742994	0.791934	0.101311
RPS6	0.0984186	22.9253	0.444873	0.67262	0.740194	0.130654
KRT5	0.09605	17.9295	0.0799322	0.938992	0.953723	0.0205777
RPL38	0.0902411	22.0588	0.413255	0.694345	0.758241	0.120193
COPE	0.0853639	18.6383	0.0651834	0.950229	0.959282	0.0180538
PRMT5	0.0809933	17.9086	0.078178	0.940328	0.953723	0.0205777
GTF3C5	0.0751497	17.8415	0.0827185	0.936871	0.953723	0.0205777
RPL24	0.0729369	23.2697	0.305605	0.770635	0.816506	0.0880407
RPS9	0.0636057	22.222	0.247643	0.812991	0.852503	0.0693039
RPL6	0.0624349	24.848	0.255516	0.807193	0.848923	0.0711315
RPS24	0.0574609	21.7488	0.18964	0.856089	0.885953	0.0525894
RPS19	0.0540193	19.4786	0.213339	0.838403	0.87018	0.0603911
RPS3	0.0539815	23.5234	0.258896	0.804708	0.847562	0.0718286
TUBA1C	0.0518935	19.9051	0.222903	0.831295	0.867862	0.0615491
PARK7	0.0504981	20.6045	0.21412	0.837823	0.87018	0.0603911
NDUFA2	0.0493763	19.4671	0.207897	0.842456	0.873113	0.0589295
SEPTIN2	0.0324652	16.3869	0.0534353	0.959188	0.964607	0.0156496
RPS8	0.0294868	23.857	0.124405	0.905217	0.928695	0.0321268
SEC22B	0.0260811	18.2304	0.0796421	0.939213	0.953723	0.0205777
RPL14	0.0247843	22.2727	0.106721	0.918625	0.938395	0.0276144
NDUFA9	0.0231105	19.7245	0.0874142	0.933298	0.952018	0.021355
BMP2K	0.0212859	19.0819	0.0679383	0.948129	0.959282	0.0180538
RPS29	0.0149392	19.2618	0.0639116	0.951198	0.959282	0.0180538
MTHFD1	0.00991075	19.1084	0.0322179	0.975384	0.978132	0.00960261
RPL7	-0.00323239	23.4684	-0.0120547	0.990788	0.990788	0.00401921
NCL	-0.0087581	21.3436	-0.0286974	0.978073	0.979449	0.00901826
P4HB	-0.0138456	18.2192	-0.0341318	0.973923	0.978044	0.00964179
MSN	-0.0166949	19.171	-0.0582923	0.955483	0.96224	0.0167165
EIF4A2	-0.0312932	18.556	-0.11429	0.912883	0.934992	0.0291922
RPL23A	-0.0381866	21.7485	-0.16924	0.871388	0.89787	0.0467866
FUS	-0.0449239	18.8261	-0.0655211	0.949971	0.959282	0.0180538
PRKCSH	-0.069883	18.6267	-0.251785	0.809939	0.850556	0.0702973
TUBB	-0.0703047	22.1725	-0.273291	0.794152	0.838926	0.0762762
TTLL12	-0.0891723	18.692	-0.174183	0.867675	0.89534	0.0480121
RANBP1	-0.0909121	21.445	-0.307799	0.769047	0.816506	0.0880407
RPL32	-0.0970501	21.4105	-0.353875	0.73601	0.786845	0.104111
TOMM22	-0.103024	20.1073	-0.404484	0.70043	0.762548	0.117733
MCM5	-0.118235	20.936	-0.504838	0.632377	0.716078	0.14504
PRDX6	-0.121124	21.0121	-0.43894	0.676671	0.742357	0.129387
EBAG9	-0.124559	18.0413	-0.219424	0.833879	0.869286	0.0608375
RPL12	-0.131026	21.686	-0.495783	0.63837	0.71762	0.144105
PSMA1	-0.13148	18.5908	-0.497378	0.637312	0.71762	0.144105
PDCD6IP	-0.131507	18.2808	-0.351222	0.737896	0.787679	0.103651
ZPR1	-0.135835	17.1128	-0.179392	0.863766	0.8926	0.049343
RPSA	-0.14138	20.9421	-0.619114	0.559486	0.656984	0.182445
ACTL6A	-0.143161	17.9196	-0.112842	0.913981	0.934992	0.0291922
RPN2	-0.152684	18.1705	-0.619813	0.559057	0.656984	0.182445
RO60	-0.159064	18.529	-0.409063	0.69725	0.760248	0.119045
MIF	-0.169967	22.3762	-0.611345	0.564275	0.658629	0.181359
CHD1L	-0.170912	20.6	-0.483642	0.646453	0.722397	0.141224
PSMD2	-0.17733	18.1862	-0.414199	0.693691	0.758241	0.120193
ZC3HAV1	-0.177424	20.9508	-0.476393	0.651305	0.725711	0.139236
MSH2	-0.1813	18.1492	-0.632142	0.551514	0.652524	0.185403
PPP1CA	-0.181612	17.2497	-0.370016	0.724577	0.778633	0.108667
HSPA8	-0.184623	23.5161	-0.755341	0.479746	0.591658	0.227929
ATP6V1B2	-0.193709	18.5907	-0.483539	0.646522	0.722397	0.141224
ALDOA	-0.1952	20.5076	-0.656519	0.53679	0.642344	0.192232
RPL4	-0.199072	24.3356	-0.817543	0.446072	0.568163	0.245527
PA2G4	-0.199689	20.2498	-0.76978	0.471774	0.585197	0.232698
POLR1C	-0.200805	20.4216	-0.826979	0.441116	0.563868	0.248822
MACF1	-0.20173	18.0448	-0.557429	0.598187	0.683642	0.165171
EEF1G	-0.208555	21.2188	-0.388529	0.711562	0.771129	0.112873
MVD	-0.213115	18.766	-0.798247	0.456331	0.572613	0.242139
MLEC	-0.22101	23.2144	-0.605635	0.567809	0.66111	0.179726
HSPA1A	-0.222726	22.3036	-0.942301	0.383818	0.514288	0.288794
RBM3	-0.226864	19.5118	-0.468379	0.656691	0.730569	0.136339
HSPA5	-0.230662	22.4064	-0.808361	0.450933	0.570274	0.243917
LRRC47	-0.24114	19.3454	-0.723855	0.497453	0.604414	0.218665
PDIA6	-0.246757	23.1068	-0.828791	0.440169	0.56367	0.248975
STMN1	-0.247049	21.1051	-0.886671	0.410704	0.540148	0.267488
PPP1R7	-0.247121	19.587	-0.96324	0.37406	0.509236	0.293081
VCP	-0.248508	19.1095	-0.729876	0.494033	0.603347	0.219433
RPL7A	-0.24883	22.2249	-1.11234	0.310199	0.449821	0.34696
XRN2	-0.25309	18.46	-0.578498	0.584794	0.674065	0.171298
AHCY	-0.255798	20.1802	-1.16067	0.291557	0.433379	0.363132
RBBP6	-0.256868	22.1853	-0.361059	0.730912	0.783749	0.105823
SRM	-0.258147	21.2479	-1.03931	0.340262	0.482173	0.316797
NPEPPS	-0.260997	17.1571	-0.381229	0.716681	0.773771	0.111388
MMTAG2	-0.265765	19.5868	-0.961278	0.374966	0.509496	0.29286
RPS3A	-0.269073	23.6837	-1.00011	0.357358	0.497683	0.303047
PRPF38A	-0.276113	20.8655	-0.833548	0.43769	0.561505	0.250646
RPL37A	-0.277204	15.9566	-0.454104	0.666342	0.737394	0.132301
NOP10	-0.282164	19.464	-0.689911	0.517035	0.623947	0.204852
IMPDH2	-0.288577	18.8344	-0.885713	0.41118	0.540148	0.267488
RPL13	-0.294628	23.6395	-1.1547	0.293807	0.434907	0.361603
RPS25	-0.301809	19.386	-0.810462	0.449817	0.569875	0.244221
HNRNPD	-0.302215	18.1002	-0.552363	0.601433	0.685153	0.164213
POP4	-0.3024	16.6217	-0.380407	0.717259	0.773771	0.111388
CYRIB	-0.305256	18.8538	-1.25296	0.258628	0.3984	0.39968
SNRNP27	-0.306032	24.1715	-0.945016	0.382541	0.513905	0.289117
ARL6IP4	-0.31176	19.2762	-0.677519	0.52431	0.630589	0.200254
MDH1	-0.318333	19.7402	-0.983661	0.364733	0.503056	0.298384
CAPZA1	-0.320198	19.3042	-0.578056	0.585073	0.674065	0.171298
MCM6	-0.322895	21.0192	-1.21404	0.272099	0.41308	0.383966
PHGDH	-0.325553	21.2697	-1.09597	0.316737	0.456511	0.340549
PAICS	-0.325846	18.9287	-1.0373	0.341118	0.482173	0.316797
GLUL	-0.325865	18.8742	-0.848797	0.429813	0.555146	0.255593
EEF1D	-0.330134	21.0411	-0.728136	0.49502	0.603517	0.21931
HSP90AA1	-0.332245	22.1753	-1.19176	0.280082	0.422496	0.374177
CCT7	-0.333328	19.6116	-1.13724	0.300474	0.440201	0.356349
NCBP1	-0.334145	18.9164	-0.557567	0.598098	0.683642	0.165171
SERPINH1	-0.336906	21.0399	-0.969516	0.371174	0.507141	0.294871
PKM	-0.33788	22.5049	-1.45149	0.198782	0.343526	0.46404
VARS1	-0.338874	18.4982	-1.38954	0.215939	0.361761	0.441578
DDX46	-0.340784	25.5849	-1.14778	0.296434	0.437177	0.359343
ATP6V1A	-0.344322	19.0558	-1.30187	0.242542	0.381213	0.418832
LUC7L2	-0.346482	26.1517	-1.06468	0.329557	0.471174	0.326819
RABL6	-0.348189	22.2551	-0.979084	0.366807	0.503212	0.298249
SNRPD3	-0.349035	19.7407	-0.671355	0.527953	0.6339	0.197979
NONO	-0.355858	20.4732	-0.999439	0.357655	0.497683	0.303047
SF3B3	-0.357075	22.2263	-0.70665	0.507315	0.6143	0.211619
RPL36	-0.366073	23.5327	-1.51571	0.182342	0.325382	0.487607
ENO1	-0.36637	21.7777	-1.71938	0.138342	0.280508	0.552055
TCOF1	-0.369561	21.1528	-0.590632	0.577162	0.669283	0.17439
ADAR	-0.36983	18.7077	-0.995883	0.35924	0.498595	0.302252
ACOT7	-0.371472	18.3046	-1.10992	0.31116	0.450296	0.346502
DDX42	-0.373713	19.4051	-0.754331	0.480307	0.591658	0.227929
KRT10	-0.374684	22.0361	-0.442878	0.673981	0.740547	0.130447
SND1	-0.375047	21.2769	-1.2562	0.257534	0.397753	0.400386
MCM3	-0.377142	20.699	-1.38315	0.217783	0.362053	0.441228
HSPA4	-0.378083	17.8223	-0.802125	0.454256	0.571431	0.243036
PRDX1	-0.378746	20.6853	-1.25165	0.259072	0.3984	0.39968
RPL35A	-0.38109	24.2886	-0.855919	0.42617	0.553709	0.256718
KIF2A	-0.381904	18.1779	-0.914295	0.397178	0.528581	0.276888
PCNA	-0.384401	19.5206	-0.782364	0.464902	0.578689	0.237555
DHX9	-0.384648	20.5824	-1.51837	0.181689	0.325031	0.488075
FUBP1	-0.385802	22.0259	-1.30689	0.240941	0.381213	0.418832
VPS35	-0.387954	20.5193	-0.839504	0.434601	0.558548	0.252939
SF3B1	-0.388663	20.6587	-0.968132	0.371809	0.507141	0.294871
TCP1	-0.389347	20.5612	-1.41203	0.209559	0.3561	0.448428
GAPDH	-0.389763	21.4329	-1.59757	0.163243	0.3083	0.511027
RPL19	-0.392981	25.5149	-1.4002	0.212893	0.360048	0.44364
MCM4	-0.39809	20.2165	-1.58154	0.166825	0.311757	0.506184
PPM1F	-0.399472	20.2814	-1.4942	0.187701	0.33162	0.47936
RPS7	-0.400202	23.2495	-1.57649	0.16797	0.312935	0.504546
PSMC3	-0.407307	21.6484	-1.52239	0.180707	0.324755	0.488444
HSP90B1	-0.412671	21.9327	-1.63602	0.154948	0.300066	0.522783
LARP1	-0.416327	19.9777	-1.74895	0.132878	0.273438	0.563141
CPSF6	-0.417636	19.5032	-0.619119	0.559484	0.656984	0.182445
DDOST	-0.41861	21.4527	-1.24145	0.262551	0.40115	0.396693
PARP1	-0.419057	21.2702	-0.847665	0.430394	0.555146	0.255593
TPD52L2	-0.421182	17.2922	-0.435465	0.679049	0.74382	0.128532
SSRP1	-0.422427	18.4111	-0.946114	0.382026	0.513905	0.289117
TBCA	-0.42313	19.8469	-1.52744	0.17948	0.324345	0.488992
ALYREF	-0.429931	18.4736	-1.17867	0.284866	0.426999	0.369573
RTCB	-0.434273	20.449	-1.57489	0.168334	0.312935	0.504546
RPS21	-0.435387	19.1132	-1.95556	0.100243	0.22876	0.640621
PPIA	-0.435824	22.5226	-1.38229	0.218034	0.362053	0.441228
PRKDC	-0.438246	19.9981	-1.30515	0.241494	0.381213	0.418832
CCT3	-0.440997	21.5306	-1.28923	0.246611	0.385905	0.41352
PRDX2	-0.44468	20.3461	-1.65256	0.151506	0.297169	0.526997
TKT	-0.445277	19.5602	-0.936598	0.38651	0.515347	0.287901
SNX2	-0.445556	17.9996	-1.79462	0.124856	0.26301	0.580027
DDX17	-0.447684	20.1395	-0.868107	0.419989	0.547678	0.261475
ILF3	-0.462174	20.4463	-1.86212	0.113872	0.250236	0.60165
RPL5	-0.466206	21.755	-2.02319	0.0914184	0.214112	0.66936
GMPS	-0.467541	20.3574	-2.03978	0.0893769	0.211416	0.674861
SRRM2	-0.471474	25.9572	-1.00561	0.354918	0.496466	0.30411
KHSRP	-0.475695	22.2997	-1.29058	0.246174	0.385905	0.41352
EEF1B2	-0.477557	19.8605	-1.60818	0.160913	0.30552	0.51496
TPD52	-0.480536	20.3525	-1.7866	0.126231	0.265121	0.576555
CCT4	-0.482153	20.2019	-1.90569	0.107299	0.240242	0.619352
GART	-0.483074	21.0157	-1.92284	0.104818	0.236921	0.625396
SYNCRIP	-0.483377	19.5438	-2.04047	0.0892938	0.211416	0.674861
FKBP4	-0.485956	19.9127	-1.3129	0.239037	0.380639	0.419487
PSMC1	-0.486935	18.6467	-1.40094	0.212683	0.360048	0.44364
CLNS1A	-0.491226	18.8861	-1.91731	0.105612	0.237961	0.623495
SF3B2	-0.4919	22.5373	-1.81645	0.121193	0.259908	0.585181
TNPO1	-0.493045	19.6202	-2.23062	0.0690004	0.1793	0.746419
XRCC6	-0.493478	21.5277	-1.745	0.133596	0.274121	0.562057
FLNC	-0.500602	19.0544	-1.31319	0.238948	0.380639	0.419487
MAP4	-0.504268	18.0732	-1.19886	0.277514	0.419511	0.377256
MSH6	-0.505474	19.8167	-1.94944	0.101084	0.229941	0.638383
SNRPE	-0.507064	21.0844	-1.72073	0.138086	0.280508	0.552055
HNRNPM	-0.509485	23.1058	-1.97949	0.0970256	0.225024	0.647772
TRIM28	-0.513482	21.9947	-1.54824	0.174509	0.31941	0.495651
HYOU1	-0.513917	19.355	-1.42218	0.206735	0.353835	0.4512
PFN1	-0.515703	20.1939	-1.55552	0.172801	0.317466	0.498303
EIF3A	-0.521838	19.9406	-1.0228	0.347378	0.488801	0.310868
SRSF2	-0.523023	19.1636	-1.55509	0.172904	0.317466	0.498303
EEF2	-0.523974	22.0739	-1.44392	0.200808	0.34535	0.46174
HSP90AB1	-0.524148	23.5604	-1.70623	0.14084	0.282473	0.549023
DYNC1H1	-0.53045	19.4656	-2.28253	0.0643381	0.172863	0.762298
SREK1	-0.531348	19.9536	-1.25981	0.256319	0.397602	0.400552
RPS23	-0.545137	21.1658	-1.64668	0.152721	0.298729	0.524723
CCT6A	-0.547034	22.5179	-2.01298	0.0926982	0.216397	0.664749
HNRNPK	-0.548581	20.9956	-2.35146	0.0586507	0.165717	0.780632
PABPC4	-0.550069	18.6398	-1.52838	0.179254	0.324345	0.488992
ELF1	-0.551847	17.9953	-1.51017	0.183708	0.327001	0.485451
MCM7	-0.552247	21.5612	-2.24968	0.0672492	0.177339	0.751197
NOP56	-0.554801	19.6173	-1.36237	0.223886	0.368145	0.433981
SRSF11	-0.567567	24.2297	-1.39707	0.213782	0.360257	0.443388
RBM39	-0.571826	22.2411	-1.48351	0.190417	0.335587	0.474195
UGGT1	-0.575429	16.0995	-1.43191	0.204064	0.350104	0.455802
THRAP3	-0.577063	20.1284	-2.03585	0.0898563	0.211847	0.673978
AP3B1	-0.586354	18.5826	-1.52317	0.180516	0.324755	0.488444
LUC7L3	-0.58865	22.0869	-1.79723	0.124414	0.262856	0.580282
KPNB1	-0.589038	21.1658	-2.51682	0.0470604	0.149381	0.825704
RUVBL2	-0.589503	20.9697	-2.37457	0.0568638	0.165253	0.78185
HAX1	-0.590426	22.126	-1.82002	0.120605	0.259428	0.585983
C11orf98	-0.592175	19.0456	-2.26287	0.0660636	0.176118	0.754196
GANAB	-0.592981	22.2358	-2.21425	0.070543	0.180671	0.743111
FARSB	-0.594071	19.0238	-2.33372	0.0600622	0.167365	0.776334
CCT8	-0.597891	21.6696	-1.71349	0.139455	0.28128	0.550861
RPN1	-0.598982	21.8384	-2.32135	0.0610672	0.167876	0.775012
ZNRD2	-0.603008	20.0734	-1.49982	0.186287	0.329941	0.481564
SMC2	-0.60336	18.5638	-1.5856	0.165912	0.311686	0.506283
PUF60	-0.603921	25.3614	-1.58235	0.166643	0.311757	0.506184
EIF4G1	-0.604673	20.1867	-1.3561	0.225756	0.370364	0.431371
SRSF3	-0.609209	22.5586	-2.47235	0.0499172	0.153194	0.814758
RPL18	-0.609245	25.3096	-2.13167	0.0788866	0.19435	0.711415
MTA2	-0.610626	18.1474	-1.32303	0.235862	0.38024	0.419942
DDX3X	-0.610683	20.0471	-1.55546	0.172815	0.317466	0.498303
HNRNPL	-0.61672	18.9172	-1.20036	0.276977	0.419511	0.377256
MAT2A	-0.618498	19.4878	-1.76778	0.129512	0.269626	0.569237
EFTUD2	-0.618947	19.8477	-1.52087	0.181078	0.324755	0.488444
SNRPA	-0.623625	22.0663	-2.59118	0.0426656	0.139348	0.855899
RPRD1A	-0.624572	18.7837	-2.3559	0.0583029	0.165717	0.780632
HNRNPU	-0.626844	23.2809	-2.1845	0.073438	0.186078	0.730306
STIP1	-0.635837	21.4795	-2.465	0.0504068	0.153374	0.814247
FASN	-0.638793	22.1228	-1.35297	0.226694	0.371049	0.430569
ABCF2	-0.645214	18.3581	-1.31856	0.237259	0.38024	0.419942
FLNB	-0.645606	19.5632	-1.91164	0.106432	0.239053	0.621506
XRCC5	-0.657308	20.4066	-2.41229	0.0540699	0.159742	0.796581
PABPC1	-0.659041	17.9891	-1.50006	0.186227	0.329941	0.481564
TRMT1	-0.661558	18.8008	-2.08016	0.0846016	0.203501	0.691433
SRSF4	-0.666633	22.7739	-2.78293	0.0332387	0.11601	0.935506
SF1	-0.667979	20.0615	-1.77948	0.127462	0.266138	0.574892
prpL	-0.673047	26.0215	-2.20727	0.0712109	0.181728	0.740578
RPL17	-0.673438	20.3543	-2.65704	0.0391387	0.130218	0.885328
PSMA6	-0.674289	18.9739	-0.993017	0.360522	0.498945	0.301947
ATXN2L	-0.675471	19.9056	-1.95659	0.100102	0.22876	0.640621
SNRNP200	-0.678227	18.0889	-0.848183	0.430128	0.555146	0.255593
H4C8	-0.678705	19.5417	-1.47758	0.191941	0.336606	0.472879
SEPTIN7	-0.680238	19.3576	-2.80293	0.0323929	0.114201	0.942331
ACLY	-0.681028	21.152	-2.95536	0.0266658	0.102339	0.989961
YARS1	-0.693633	17.1616	-0.80226	0.454183	0.571431	0.243036
TRA2A	-0.714781	18.8977	-1.39386	0.214699	0.360532	0.443056
DDX1	-0.717363	19.5562	-2.26742	0.0656607	0.175753	0.755096
PRPF40A	-0.731843	17.7074	-0.61177	0.564012	0.658629	0.181359
COPA	-0.737012	20.4296	-2.84198	0.0308086	0.113374	0.945486
CCT2	-0.740138	21.1393	-2.54505	0.0453373	0.144754	0.839369
FARSA	-0.741077	18.6234	-2.83775	0.0309761	0.113374	0.945486
HDLBP	-0.751457	17.2723	-0.569985	0.590184	0.677759	0.168925
CCT5	-0.755038	21.0493	-2.77404	0.0336219	0.116775	0.932652
NPM1	-0.7634	22.6231	-2.45471	0.0511003	0.15399	0.812507
POLR2E	-0.771934	18.7438	-1.77999	0.127374	0.266138	0.574892
DPYSL2	-0.784989	18.0032	-1.68607	0.144759	0.28865	0.539628
PCBP1	-0.786209	18.1862	-2.50782	0.0476239	0.15	0.823907
CLTC	-0.837998	21.8872	-2.99097	0.0254929	0.101365	0.994112
GCN1	-0.841771	20.222	-2.41494	0.0538797	0.159742	0.796581
MTREX	-0.854014	18.1172	-1.11573	0.308859	0.449214	0.347547
POLDIP3	-0.86443	19.8457	-3.03351	0.0241649	0.0983166	1.00737
MAPK1	-0.871899	17.7685	-1.62824	0.156592	0.301335	0.520951
CAD	-0.872992	20.8435	-3.24154	0.018675	0.0869061	1.06095
SON	-0.875352	20.1231	-3.10894	0.0219927	0.0949274	1.02261
SSB	-0.883638	15.9973	-0.902143	0.403086	0.535443	0.271287
GPATCH1	-0.910879	19.5837	-1.15601	0.293314	0.434907	0.361603
PTBP1	-0.912433	18.2471	-1.55467	0.173001	0.317466	0.498303
DDX39B	-0.919755	18.964	-2.98684	0.025626	0.101365	0.994112
PABPN1	-0.926587	18.519	-1.54398	0.175518	0.320433	0.494263
SRSF5	-0.927348	19.0137	-2.28795	0.0638709	0.172863	0.762298
TLN1	-0.951887	20.526	-2.96154	0.0264581	0.102339	0.989961
RUVBL1	-0.952434	20.2913	-3.87496	0.00887633	0.0549561	1.25998
SNX1	-0.962249	17.1758	-0.982144	0.36542	0.503056	0.298384
WDR77	-0.987848	17.9603	-0.941338	0.384271	0.514288	0.288794
PSMC5	-1.01412	19.079	-3.90669	0.00856572	0.0534982	1.27166
UBA1	-1.06166	18.1818	-4.12451	0.00673514	0.0461098	1.33621
PSMC6	-1.06834	18.6501	-3.20167	0.0196108	0.089224	1.04952
HSD17B4	-1.07481	20.4349	-1.96452	0.0990263	0.228177	0.641728
KDM1A	-1.09463	17.7365	-1.38478	0.217313	0.362053	0.441228
TRA2B	-1.106	19.3335	-2.04456	0.0887983	0.211416	0.674861
FLNA	-1.17725	17.6778	-0.946325	0.381927	0.513905	0.289117
ACAA1	-1.1899	20.3755	-1.68415	0.145136	0.28865	0.539628
AHNAK	-1.19033	20.4908	-2.15951	0.0759652	0.190274	0.720622
SLC25A3	-1.19622	19.9991	-0.649431	0.541045	0.645267	0.190261
FRG1	-1.19658	17.7189	-1.01946	0.348832	0.489878	0.309912
SCP2	-1.19947	20.433	-2.34523	0.0591422	0.165785	0.780456
COPB1	-1.23121	19.6113	-4.81877	0.00327889	0.0281273	1.55087
MARS1	-1.28396	20.7508	-4.74136	0.00354097	0.0286497	1.54288
TXNL1	-1.28895	17.7094	-1.45296	0.198389	0.343526	0.46404
NCAPH	-1.30108	17.4515	-1.31764	0.237548	0.38024	0.419942
GAPVD1	-1.30999	18.3799	-2.3522	0.0585927	0.165717	0.780632
EHHADH	-1.31418	17.1459	-1.46224	0.195937	0.341928	0.466065
NSF	-1.34593	19.4451	-4.83181	0.00323697	0.0281063	1.5512
KRT1	-1.37546	21.8381	-2.48309	0.0492104	0.151679	0.819075
RBBP4	-1.40671	18.5312	-4.20938	0.00614476	0.0428928	1.36762
EIF4A1	-1.44474	18.9379	-0.893627	0.407266	0.538984	0.268424
DDX20	-1.44504	18.3226	-2.85612	0.0302558	0.112786	0.947744
HEATR3	-1.44921	17.0012	-1.38015	0.218656	0.362053	0.441228
MYH10	-1.45338	17.4466	-1.47353	0.192988	0.337611	0.471583
PDIA3	-1.45914	21.016	-4.77787	0.0034145	0.0282689	1.54869
KRT9	-1.53007	19.1399	-2.28499	0.0641255	0.172863	0.762298
DARS1	-1.55402	19.671	-5.79666	0.00132602	0.0149704	1.82477
KARS1	-1.63869	20.515	-5.59851	0.00157817	0.0160522	1.79447
KPNA2	-1.64826	18.5459	-1.07211	0.326474	0.468648	0.329153
RACK1	-1.671	19.3451	-1.13108	0.302856	0.44278	0.353812
HNRNPA2B1	-1.67955	18.1837	-1.67553	0.146848	0.291242	0.535747
LARS1	-1.71888	20.8489	-6.76843	0.000599785	0.00948994	2.02274
EPRS1	-1.78564	21.1537	-7.41188	0.000372442	0.00646778	2.18924
ETF1	-1.82159	18.3457	-1.45583	0.197629	0.3432	0.464453
HSPH1	-1.84801	18.3451	-1.30974	0.240038	0.380639	0.419487
RARS1	-1.91417	20.1954	-8.01621	0.000245433	0.00499281	2.30165
KLC1	-1.91917	16.7542	-1.26588	0.25429	0.396181	0.402106
YJU2	-1.9423	17.7192	-5.95012	0.00116227	0.0137923	1.86036
GDI2	-1.95625	17.948	-1.8346	0.11823	0.25509	0.593307
HNRNPC	-1.994	22.3784	-7.29866	0.000403988	0.00684857	2.1644
PUM1	-1.99513	18.23	-1.69498	0.143015	0.286029	0.543589
DHX15	-2.01639	18.0672	-2.08184	0.084408	0.203501	0.691433
TFRC	-2.03074	23.2121	-6.28119	0.000882171	0.0123158	1.90954
DCTN2	-2.0454	16.9753	-1.88025	0.111089	0.247173	0.606999
SRSF7	-2.10865	18.8209	-1.70788	0.140524	0.282473	0.549023
PAK2	-2.15845	16.8822	-2.81332	0.031963	0.114201	0.942331
IARS1	-2.16567	19.8423	-8.73873	0.000154229	0.00366037	2.43647
WARS1	-2.21991	17.7883	-2.3265	0.0606464	0.167365	0.776334
RPL30	-2.2302	18.1671	-1.86254	0.113807	0.250236	0.60165
EIF5B	-2.31854	18.6358	-1.8003	0.123893	0.262856	0.580282
DCTN1	-2.33939	16.677	-3.05885	0.0234101	0.0969069	1.01365
ATXN2	-2.36427	19.3043	-1.53677	0.177235	0.32274	0.491147
MIA3	-2.38257	17.0104	-2.95332	0.0267345	0.102339	0.989961
PDCD5	-2.52123	18.2128	-2.33172	0.0602236	0.167365	0.776334
SEPTIN9	-2.7109	17.7282	-2.12377	0.0797367	0.195095	0.709754
ATP1A1	-2.74798	17.226	-2.89511	0.0287861	0.108443	0.964799
OSBPL11	-2.74991	18.4825	-9.9727	7.5e-05	0.00240662	2.61859
LIG3	-2.87421	16.4239	-7.85036	0.000274444	0.0052812	2.27727
GTSE1	-2.97784	16.4758	-5.29214	0.00208446	0.0192745	1.71502
AIMP2	-3.32922	16.6515	-8.59411	0.000168794	0.00385662	2.41379
WASF2	-3.40429	16.689	-9.84321	8.06e-05	0.00240662	2.61859
THOC1	-3.55214	19.1703	-3.11996	0.0216936	0.0947597	1.02338
ELMO2	-3.8291	16.9014	-9.42422	0.000102292	0.00280123	2.55265
SPATA5L1	-3.91195	17.9821	-5.39314	0.00189939	0.0182613	1.73847
QARS1	-4.32695	17.5232	-16.9766	3.83e-06	0.000544994	3.26361
FRYL	-4.74055	20.7947	-17.9121	2.82e-06	0.00052308	3.28143
HOMER1	-6.72364	19.4737	-5.76191	0.00136668	0.0149704	1.82477
