# Supplementary material for: Genome-wide CRISPRi screening identifies OCIAD1 as a prohibitin client and regulatory determinant of mitochondrial Complex III assembly in human cells
Source: eLife. 2021 May 26;10:e67624. doi: 10.7554/eLife.67624 (PMC8154037; doi:10.7554/eLife.67624)
Supplement: Figure 4—source data 2. [file elife-67624-fig4-data2.xlsx]

## Sheet: Cell proteome limma output
Genes	Scramble_vs_OCIAD1	Scramble_vs_OCIAD2	Scramble_vs_D1D2	Scramble_vs_Rescue	Rescue_vs_OCIAD1	Rescue_vs_OCIAD2	Rescue_vs_D1D2	OCIAD1_vs_OCIAD2	OCIAD1_vs_D1D2	OCIAD2_vs_D1D2	AveExpr	F	P.Value	adj.P.Val
OCIAD1	6.18489	0.0903482	6.99021	-2.12942	8.31432	2.21977	9.11963	-6.09455	0.805314	6.89986	20.5297	136.521	3.914e-10	2.17579e-06
OCIAD2	1.25232	5.34806	5.36546	-0.214771	1.46709	5.56283	5.58023	4.09574	4.11314	0.0173979	18.782	62.0551	2.12448e-08	5.905e-05
UQCRB	0.740808	0.00131532	0.937329	0.211548	0.52926	-0.210232	0.725782	-0.739492	0.196522	0.936014	22.1344	35.6494	6.1792e-07	0.000792105
ASS1	-0.774744	-0.102767	-0.458696	-1.03637	0.26163	0.933607	0.577677	0.671977	0.316047	-0.35593	21.1597	35.1458	6.72407e-07	0.000792105
STXBP6	-1.29643	-1.06857	2.78157	-0.643573	-0.652855	-0.425001	3.42514	0.227854	4.078	3.85014	18.5937	34.8048	7.12453e-07	0.000792105
GARS1	-0.445401	0.0834725	0.0162155	-0.520658	0.0752576	0.604131	0.536874	0.528873	0.461616	-0.067257	23.02	31.976	1.17524e-06	0.000996083
YES1	-0.0215302	0.584854	0.692641	8.7823e-05	-0.021618	0.584767	0.692553	0.606385	0.714171	0.107787	21.558	30.2527	1.62609e-06	0.000996083
NPEPL1	2.72524	2.72905	2.74645	2.766	-0.0407607	-0.0369493	-0.0195514	0.00381145	0.0212093	0.0173979	16.3198	30.0481	1.69184e-06	0.000996083
HSD17B10	-0.767084	-0.641987	-0.730787	-0.774442	0.00735789	0.132455	0.0436549	0.125097	0.036297	-0.0887996	22.6155	29.9606	1.72086e-06	0.000996083
VAMP8	-0.580988	-1.61151	-1.16895	-0.874857	0.29387	-0.736652	-0.294095	-1.03052	-0.587965	0.442557	19.1462	29.3596	1.93666e-06	0.000996083
CDH13	-0.332136	-0.979033	-1.24508	-0.110243	-0.221893	-0.86879	-1.13483	-0.646897	-0.912941	-0.266044	19.899	29.2711	1.97102e-06	0.000996083
TAX1BP1	0.684753	0.183405	0.780119	0.680655	0.00409704	-0.497251	0.099464	-0.501348	0.0953669	0.596715	21.0978	28.4678	2.31697e-06	0.00107334
GHITM	-1.3958	-0.119905	-1.51776	-0.210634	-1.18516	0.0907291	-1.30712	1.27589	-0.121959	-1.39785	21.7029	26.7971	3.28677e-06	0.00140547
MAPK1	-0.0133642	0.402461	0.424791	0.0109755	-0.0243397	0.391485	0.413816	0.415825	0.438156	0.0223308	22.9575	20.2941	1.58148e-05	0.00609225
NIPSNAP2	-0.0893571	0.435685	0.654498	-0.249444	0.160086	0.685129	0.903941	0.525042	0.743855	0.218813	21.5421	20.1527	1.64389e-05	0.00609225
ARHGEF2	-0.630225	-0.302153	-0.513152	-0.916885	0.28666	0.614732	0.403733	0.328072	0.117073	-0.210999	21.0156	19.145	2.18052e-05	0.00757594
UQCRC2	0.620869	-0.0131435	0.724903	-0.064352	0.685221	0.0512085	0.789255	-0.634013	0.104034	0.738047	21.9742	18.2627	2.82143e-05	0.008508
PCK2	-0.549599	-0.123969	-0.378139	-0.578611	0.029012	0.454642	0.200472	0.42563	0.17146	-0.25417	22.6489	18.1285	2.93685e-05	0.008508
NCK2	0.130958	0.13371	1.03306	-0.142714	0.273672	0.276425	1.17578	0.00275258	0.902106	0.899353	19.8414	17.9237	3.1236e-05	0.008508
CARS1	-0.537892	-0.230007	-0.269464	-0.589975	0.0520834	0.359969	0.320511	0.307885	0.268427	-0.0394579	21.5919	17.8657	3.17897e-05	0.008508
CAPG	0.665345	-0.269057	-0.0836175	0.377935	0.28741	-0.646992	-0.461552	-0.934403	-0.748963	0.18544	19.9413	17.7533	3.28955e-05	0.008508
CYC1	0.948047	-0.0554535	0.955894	0.0177447	0.930302	-0.0731982	0.938149	-1.0035	0.00784729	1.01135	22.4181	17.677	3.36708e-05	0.008508
YARS1	-0.352003	-0.0142369	-0.0694108	-0.407051	0.0550477	0.392814	0.33764	0.337766	0.282592	-0.0551739	23.5841	16.909	4.27718e-05	0.0103377
EPS8L2	0.548766	-0.192254	-0.359151	0.633858	-0.0850922	-0.826112	-0.993009	-0.74102	-0.907917	-0.166897	19.5872	15.2455	7.41318e-05	0.0166709
UQCRC1	0.661982	-0.0843019	0.991458	-0.0108894	0.672871	-0.0734125	1.00235	-0.746284	0.329476	1.07576	22.9014	15.2128	7.49727e-05	0.0166709
SPART	0.191407	0.844198	1.1476	0.259374	-0.0679673	0.584824	0.888226	0.652791	0.956194	0.303403	19.7502	15.0371	7.96862e-05	0.0170375
GFP	0.115222	-2.23849	0.136431	-8.57988	8.69511	6.34139	8.71632	-2.35371	0.0212093	2.37492	18.0165	15.5251	8.7831e-05	0.0180834
COX7A2L	0.858411	-0.084132	0.683755	0.129275	0.729136	-0.213407	0.55448	-0.942543	-0.174656	0.767887	20.4067	14.5739	9.38335e-05	0.0186293
MYOF	0.660324	-0.0537609	0.0263851	0.452208	0.208116	-0.505969	-0.425823	-0.714085	-0.633939	0.080146	20.6153	14.1633	0.000108841	0.0208637
ASNS	-0.683647	-0.218166	-0.580408	-0.845088	0.16144	0.626922	0.264679	0.465481	0.103239	-0.362243	23.7827	13.9618	0.000117204	0.0217179
NCEH1	-0.439439	-0.573559	-0.252995	-0.72407	0.284631	0.150511	0.471075	-0.13412	0.186444	0.320564	19.9464	13.5692	0.000135717	0.0243372
PLGRKT	0.506339	0.260508	1.08323	-0.0487171	0.555056	0.309225	1.13195	-0.245831	0.576894	0.822725	20.3325	12.5849	0.000198991	0.0345684
ROR1	1.74671	1.75052	1.76791	1.78747	-0.0407607	-0.0369493	-0.0195514	0.00381145	0.0212093	0.0173979	16.1241	12.3703	0.000216956	0.0365472
SHMT2	-0.152309	0.245112	0.229226	-0.339075	0.186766	0.584187	0.568301	0.397421	0.381535	-0.015886	23.775	11.8997	0.000263297	0.0420468
SGPL1	-0.184459	0.0824414	0.421432	-0.264716	0.0802576	0.347158	0.686148	0.2669	0.60589	0.33899	20.1407	11.8867	0.000264731	0.0420468
PKN2	-0.0165759	0.489223	0.438364	0.0625138	-0.0790897	0.426709	0.37585	0.505799	0.45494	-0.0508594	20.9332	11.7722	0.000277755	0.0426264
UTRN	-0.252507	0.405238	0.541746	-0.0812518	-0.171255	0.48649	0.622997	0.657745	0.794252	0.136507	19.7107	11.7218	0.000283716	0.0426264
BCAM	0.232955	-0.244729	-0.0834949	0.278107	-0.0451522	-0.522836	-0.361602	-0.477684	-0.31645	0.161234	21.6101	11.1925	0.000356135	0.0496664
IMPA1	-0.0880034	0.374762	0.353233	0.0263928	-0.114396	0.348369	0.32684	0.462765	0.441236	-0.0215289	20.9895	11.1867	0.000357041	0.0496664
PSAT1	-0.644935	-0.344158	-0.496957	-0.953109	0.308174	0.608951	0.456152	0.300777	0.147979	-0.152799	21.3467	11.1845	0.000357377	0.0496664
PRKAR1A	0.124174	-0.37022	-0.400315	0.374182	-0.250009	-0.744402	-0.774497	-0.494394	-0.524489	-0.0300947	21.054	10.9876	0.000389716	0.0528398
DNAJC10	-0.221317	0.43546	0.306805	-0.212084	-0.00923349	0.647543	0.518889	0.656777	0.528122	-0.128654	20.723	10.2781	0.000537692	0.0711674
PALLD	0.23178	-0.226066	-0.147086	0.225941	0.00583882	-0.452007	-0.373027	-0.457846	-0.378866	0.0789797	22.114	9.95902	0.000624708	0.07935
ATP5MG	-0.0581722	-0.312677	-0.377715	0.0922785	-0.150451	-0.404955	-0.469993	-0.254504	-0.319542	-0.0650378	22.8937	9.91764	0.000637137	0.07935
TKT	0.221515	0.294221	0.397899	0.23546	-0.0139458	0.0587609	0.162438	0.0727067	0.176384	0.103677	23.9621	9.887	0.000646521	0.07935
ANK2	-1.00474	-0.161338	-0.269875	-1.16363	0.158895	1.0023	0.893758	0.843401	0.734863	-0.108537	18.3185	9.85464	0.000656611	0.07935
SLC38A2	0.46911	0.157953	0.555647	0.533004	-0.0638941	-0.375051	0.0226438	-0.311157	0.0865378	0.397694	21.1258	9.79967	0.00067416	0.0797373
ENO3	0.521783	0.043979	0.342083	0.806406	-0.284623	-0.762427	-0.464323	-0.477804	-0.179701	0.298104	19.9029	9.64735	0.000725687	0.0838073
FDXR	0.28806	-0.0747543	-0.384986	0.178501	0.109559	-0.253255	-0.563487	-0.362814	-0.673046	-0.310232	23.4186	9.48008	0.000787562	0.0838073
SLC2A3	0.558189	0.0423582	0.467719	0.536044	0.0221449	-0.493686	-0.0683255	-0.515831	-0.0904705	0.425361	22.031	9.44675	0.000800602	0.0838073
LCP1	-0.368396	0.565684	0.869197	-0.588713	0.220317	1.1544	1.45791	0.93408	1.23759	0.303513	19.332	9.36015	0.000835666	0.0838073
UQCRFS1	0.137508	0.0287693	0.938952	-0.172952	0.31046	0.201721	1.1119	-0.108739	0.801444	0.910183	21.6161	9.35438	0.000838065	0.0838073
PYCR1	-0.49623	-0.218905	-0.353342	-0.483064	-0.0131656	0.264159	0.129722	0.277324	0.142888	-0.134436	22.726	9.31817	0.000853297	0.0838073
C19orf25	0.816559	-1.57326	-1.4428	0.85732	-0.0407607	-2.43058	-2.30012	-2.38982	-2.25936	0.130463	16.8729	9.30644	0.0008583	0.0838073
SLC9A3R2	0.174166	-0.314983	-0.446217	0.480687	-0.306521	-0.795669	-0.926904	-0.489148	-0.620383	-0.131235	19.359	9.30114	0.000860572	0.0838073
BAD	0.037332	0.48338	0.736848	0.285654	-0.248322	0.197726	0.451194	0.446048	0.699516	0.253468	19.8764	9.29614	0.000862719	0.0838073
LRPAP1	0.282279	-0.666712	-0.654894	-0.00740431	0.289683	-0.659308	-0.64749	-0.948991	-0.937173	0.0118182	20.65	9.28652	0.000866873	0.0838073
CYCS	1.13535	-0.163929	0.501116	0.450613	0.684738	-0.614542	0.0505022	-1.29928	-0.634236	0.665044	20.9972	9.2692	0.000874406	0.0838073
SDC2	-0.701977	0.244379	0.155276	-0.469822	-0.232155	0.714201	0.625099	0.946356	0.857253	-0.0891025	19.0333	9.09281	0.000955581	0.0900351
SLC1A4	-0.538667	0.189973	-0.224915	-0.596952	0.058285	0.786926	0.372037	0.728641	0.313752	-0.414888	20.7525	8.91819	0.00104459	0.0959806
CBSL	-0.239193	-0.00677563	-0.225665	-0.46472	0.225528	0.457945	0.239055	0.232417	0.0135271	-0.21889	21.6841	8.90219	0.00105321	0.0959806
UGP2	0.232948	0.098773	0.341619	0.0509993	0.181949	0.0477737	0.29062	-0.134175	0.108671	0.242846	23.0599	8.84355	0.00108552	0.097329
RTN1	-0.214854	-0.170722	-0.622299	0.341805	-0.556659	-0.512527	-0.964104	0.0441322	-0.407445	-0.451577	19.0165	8.78817	0.00111708	0.0985687
ANXA8L1	2.18642	0.867236	1.99787	1.49078	0.695642	-0.623541	0.507093	-1.31918	-0.188549	1.13063	16.3194	8.70721	0.00116513	0.101202
NFYB	-0.313732	-0.946375	-0.843889	-0.734119	0.420386	-0.212256	-0.109771	-0.632642	-0.530157	0.102485	20.04	8.60611	0.00122851	0.103507
METTL7B	0.478896	1.0076	1.25526	0.30791	0.170986	0.699692	0.947352	0.528706	0.776366	0.24766	18.696	8.60551	0.0012289	0.103507
ABCB7	-0.290217	0.385668	-0.408905	0.798783	-1.089	-0.413115	-1.20769	0.675885	-0.118688	-0.794573	18.7402	8.45732	0.00132914	0.110279
SH3PXD2A	0.388066	0.815479	2.25967	0.35811	0.0299558	0.457369	1.90156	0.427414	1.8716	1.44419	18.3596	8.40549	0.00136639	0.111702
SQSTM1	0.381556	0.417875	0.837196	0.555474	-0.173918	-0.137599	0.281722	0.0363195	0.45564	0.419321	22.6402	8.34339	0.00141261	0.113807
WARS1	-0.350846	0.0334149	-0.175316	-0.436628	0.0857812	0.470042	0.261311	0.384261	0.17553	-0.208731	20.9146	8.17188	0.00154991	0.123085
SP3	0.115222	-0.47596	-1.07646	-2.23626	2.35149	1.7603	1.1598	-0.591182	-1.19168	-0.6005	16.6378	8.13333	0.00158284	0.12393
CEMIP2	0.299865	-0.00378379	0.486195	0.133493	0.166373	-0.137276	0.352703	-0.303649	0.18633	0.489979	21.5024	8.10765	0.00160523	0.123937
BACH1	0.913766	2.3572	-0.199417	0.00846478	0.905302	2.34874	-0.207882	1.44343	-1.11318	-2.55662	17.5253	8.05097	0.00165594	0.126101
EPRS1	-0.134728	0.0811907	-0.0494199	-0.200098	0.06537	0.281289	0.150678	0.215919	0.085308	-0.130611	23.1787	7.97881	0.00172317	0.129447
S100A10	0.503706	-0.00941491	0.0150843	0.509274	-0.00556798	-0.518689	-0.49419	-0.513121	-0.488622	0.0244992	24.2154	7.91323	0.00178702	0.130929
ALDH2	-0.338363	-0.142897	-0.303779	-0.421946	0.0835833	0.279049	0.118168	0.195466	0.0345843	-0.160882	21.5591	7.88952	0.00181076	0.130929
KRT8	0.311737	-0.0465547	0.0405699	0.236094	0.0756431	-0.282648	-0.195524	-0.358291	-0.271167	0.0871246	24.9594	7.8694	0.0018312	0.130929
FTH1	0.576244	-0.174163	0.126012	0.974443	-0.398198	-1.14861	-0.848431	-0.750407	-0.450233	0.300174	20.7148	7.86364	0.0018371	0.130929
OTULIN	-0.112055	-0.179991	1.08735	-0.0920124	-0.0200423	-0.0879782	1.17936	-0.067936	1.19941	1.26734	19.0161	7.78051	0.00192472	0.135437
UFC1	-0.0399645	-0.23494	-0.295751	0.0942315	-0.134196	-0.329171	-0.389983	-0.194975	-0.255787	-0.0608116	21.6931	7.71926	0.00199235	0.136809
NF2	-0.584866	-0.437316	-0.572005	-0.564002	-0.0208631	0.126686	-0.00800224	0.147549	0.0128609	-0.134688	20.107	7.6871	0.00202894	0.136809
SERPINE1	0.0514223	0.0925425	0.63049	-0.0374925	0.0889148	0.130035	0.667982	0.0411202	0.579067	0.537947	19.716	7.68043	0.00203664	0.136809
DOCK7	-0.140002	0.421261	0.251726	-0.128394	-0.0116087	0.549655	0.38012	0.561264	0.391728	-0.169535	19.9108	7.6667	0.00205256	0.136809
ETHE1	-0.0284306	-0.244882	-0.54716	-0.0834309	0.0550003	-0.161452	-0.463729	-0.216452	-0.518729	-0.302277	21.8899	7.62428	0.0021027	0.136809
COX7A2	-0.260472	-0.311683	-0.652981	0.0633561	-0.323828	-0.375039	-0.716337	-0.0512109	-0.392509	-0.341298	21.899	7.60565	0.00212515	0.136809
SFXN3	0.236948	-0.0391638	0.0994169	0.368825	-0.131878	-0.407989	-0.269408	-0.276111	-0.137531	0.138581	22.0003	7.59851	0.00213383	0.136809
ZC3HAV1L	-1.99696	-2.13539	-2.36844	-2.02002	0.0230659	-0.115369	-0.348416	-0.138435	-0.371482	-0.233048	16.8695	7.59256	0.0021411	0.136809
GSN	0.411845	0.416695	0.804446	0.43588	-0.0240343	-0.0191841	0.368566	0.00485019	0.392601	0.387751	21.9725	7.54919	0.00219491	0.138654
LMCD1	0.163546	0.278986	0.947811	0.0640546	0.0994914	0.214931	0.883756	0.11544	0.784265	0.668825	21.2007	7.50123	0.00225625	0.140927
SFXN4	-1.09098	-0.220859	-0.813126	1.2697	-2.36068	-1.49056	-2.08282	0.870125	0.277857	-0.592267	17.6534	7.30868	0.00252313	0.154839
PRKAB1	-0.284065	-0.0578594	1.67749	0.50835	-0.792414	-0.566209	1.16914	0.226205	1.96155	1.73535	17.6763	7.30087	0.00253469	0.154839
HK2	0.530308	0.252989	1.82107	-0.428316	0.958623	0.681305	2.24939	-0.277319	1.29076	1.56808	17.1526	7.24275	0.00262272	0.158435
MICB	-0.71766	-3.43043	-3.02505	-0.643306	-0.0743549	-2.78713	-2.38174	-2.71277	-2.30739	0.405384	17.4664	7.21279	0.00266945	0.158435
HAX1	0.894991	0.11898	0.872781	-0.397085	1.29208	0.516065	1.26987	-0.776011	-0.0222101	0.753801	19.3735	7.20671	0.00267906	0.158435
VPS52	-2.04158	-1.20762	-0.0103638	-2.30954	0.267963	1.10192	2.29918	0.833956	2.03121	1.19726	17.1438	7.17473	0.00273021	0.15976
STX3	0.721993	0.00806565	0.0717579	0.343694	0.3783	-0.335628	-0.271936	-0.713928	-0.650235	0.0636923	19.2261	7.14562	0.00277776	0.160819
ATP2B1	0.218569	0.127967	0.518525	0.121815	0.0967535	0.00615148	0.396709	-0.0906021	0.299956	0.390558	20.4349	7.1285	0.00280616	0.160819
GRN	0.708449	0.0453505	0.0970231	0.791664	-0.0832146	-0.746313	-0.694641	-0.663099	-0.611426	0.0516726	20.4275	7.04768	0.00294486	0.167046
ECPAS	-0.363582	-0.100972	-0.403142	-0.485625	0.122043	0.384652	0.0824821	0.26261	-0.0395607	-0.30217	20.4952	6.9882	0.00305196	0.170847
HMOX1	0.595357	0.360018	0.909685	0.699631	-0.104274	-0.339613	0.210053	-0.235339	0.314328	0.549666	19.5457	6.9605	0.00310335	0.170847
RXRB	0.148483	1.06396	2.30792	0.138196	0.0102869	0.925768	2.16972	0.915481	2.15944	1.24396	18.1356	6.96011	0.00310408	0.170847
RAB43	0.383388	0.367508	1.69562	0.565937	-0.182549	-0.19843	1.12969	-0.0158802	1.31224	1.32812	17.4997	6.81297	0.00339441	0.18456
MVP	0.244316	-0.00167138	0.133666	0.293602	-0.049286	-0.295274	-0.159936	-0.245988	-0.11065	0.135337	22.9057	6.80088	0.00341962	0.18456
ITGA2	0.4082	0.492731	0.537857	0.190835	0.217366	0.301897	0.347022	0.084531	0.129656	0.0451254	20.7842	6.75763	0.00351158	0.184879
TOMM20	0.376414	-0.264587	-0.5883	-0.172705	0.549119	-0.0918818	-0.415595	-0.641	-0.964713	-0.323713	20.1407	6.75414	0.00351912	0.184879
ZFP36L1	0.481364	-0.0299715	-0.171038	-0.0548345	0.536198	0.024863	-0.116203	-0.511335	-0.652402	-0.141066	20.9989	6.75128	0.00352531	0.184879
FAT1	1.63084	-0.662117	0.34843	1.39214	0.238698	-2.05426	-1.04371	-2.29296	-1.28241	1.01055	17.8964	6.7088	0.00361882	0.186373
PTPRF	-0.182411	0.0933474	0.0521447	-0.376393	0.193982	0.469741	0.428538	0.275758	0.234556	-0.0412027	20.0013	6.70171	0.00363472	0.186373
HCCS	0.970473	-0.463142	1.98946	-0.489367	1.45984	0.0262253	2.47883	-1.43362	1.01899	2.45261	18.917	6.72571	0.0036686	0.186373
GPX4	-0.419838	0.114814	-0.096704	-0.505148	0.0853094	0.619962	0.408444	0.534652	0.323134	-0.211518	19.5247	6.67822	0.0036879	0.186373
DCBLD2	0.403156	-0.277688	-0.101706	0.444744	-0.0415886	-0.722432	-0.54645	-0.680843	-0.504861	0.175982	20.2284	6.5342	0.0040343	0.201137
ATP6V1G1	0.372463	0.229401	0.181574	0.541881	-0.169418	-0.31248	-0.360306	-0.143063	-0.190889	-0.0478262	22.3718	6.52706	0.0040524	0.201137
CISD1	-2.23779	-1.87632	-2.78905	-1.78053	-0.457259	-0.095795	-1.00852	0.361464	-0.551259	-0.912723	18.5645	6.44347	0.00427166	0.210143
CTSZ	-0.24796	-0.109263	-0.624289	-0.139025	-0.108935	0.0297622	-0.485264	0.138697	-0.376329	-0.515026	21.5167	6.35885	0.00450754	0.219802
PHGDH	-0.313942	-0.0603013	-0.0542806	-0.391327	0.0773848	0.331026	0.337046	0.253641	0.259662	0.00602067	24.338	6.32837	0.00459615	0.220803
MOCOS	-1.49396	-0.358426	-0.477743	-1.53855	0.0445919	1.18013	1.06081	1.13554	1.01622	-0.119317	16.6769	6.32451	0.00460751	0.220803
PHF14	-0.459773	-1.73548	-1.37324	-1.09903	0.639254	-0.63645	-0.274212	-1.2757	-0.913466	0.362237	17.2108	6.31015	0.00465008	0.220939
ERG28	0.298414	-0.453773	-0.23593	0.408932	-0.110518	-0.862705	-0.644862	-0.752187	-0.534344	0.217843	20.4321	6.24496	0.00484902	0.225653
CDC27	-0.0890095	0.317136	0.355025	0.0577891	-0.146799	0.259347	0.297236	0.406145	0.444034	0.0378889	20.145	6.2433	0.00485423	0.225653
CCDC58	1.47414	-0.31591	0.0754758	0.368876	1.10527	-0.684785	-0.2934	-1.79005	-1.39867	0.391385	19.5037	6.25444	0.00487109	0.225653
P4HA2	0.270095	-0.0352549	-0.120187	0.376566	-0.106471	-0.411821	-0.496753	-0.30535	-0.390282	-0.0849324	22.1794	6.21275	0.00495094	0.227457
RAB7A	0.151652	0.10606	0.351584	0.0605243	0.0911273	0.0455353	0.29106	-0.045592	0.199933	0.245525	23.0034	6.1911	0.00502079	0.228775
COL4A2	0.576206	0.101551	-0.11517	0.613272	-0.0370662	-0.511721	-0.728443	-0.474655	-0.691376	-0.216722	21.8836	6.17003	0.00508989	0.230038
COA7	0.88129	0.149006	1.52232	0.227915	0.653376	-0.078909	1.29441	-0.732285	0.641034	1.37332	22.1641	6.30954	0.00514653	0.230722
SLC3A2	-0.171398	-0.141111	-0.134778	-0.398433	0.227035	0.257323	0.263655	0.0302875	0.0366201	0.00633267	23.8828	6.12796	0.00523109	0.232514
RRM2B	0.118118	-0.104834	-0.320059	0.133433	-0.0153151	-0.238267	-0.453492	-0.222952	-0.438177	-0.215225	21.6857	6.11656	0.00527015	0.232514
HMGCS1	0.148467	0.0132644	-0.0549979	0.370726	-0.222259	-0.357462	-0.425724	-0.135202	-0.203465	-0.0682624	22.9242	6.09069	0.00535999	0.234616
CTSB	0.404067	0.152645	0.363024	0.326377	0.0776893	-0.173732	0.0366467	-0.251422	-0.0410426	0.210379	23.3863	6.05221	0.00549686	0.238727
PDIA4	0.287395	-0.0225923	0.243827	0.210825	0.07657	-0.233417	0.0330016	-0.309987	-0.0435684	0.266419	22.7839	6.01686	0.00562616	0.242448
BIN1	0.169223	-0.155725	-0.1949	0.274532	-0.10531	-0.430257	-0.469432	-0.324948	-0.364122	-0.0391747	19.9606	6.00266	0.00567909	0.242846
EXOC3L2	0.115222	-0.622537	-0.586844	-2.64555	2.76077	2.02302	2.05871	-0.737758	-0.702066	0.0356925	16.6511	5.95106	0.00587626	0.24936
GABARAPL2	0.582718	-0.02921	0.484045	0.571567	0.011151	-0.600777	-0.0875221	-0.611928	-0.0986731	0.513255	19.9674	5.91638	0.00601315	0.251216
UBL5	2.57047	1.79591	2.59168	2.61123	-0.0407607	-0.815323	-0.0195514	-0.774562	0.0212093	0.795772	16.4445	5.90049	0.00607713	0.251216
NENF	0.201033	-0.107339	-0.199164	0.357652	-0.156619	-0.464991	-0.556816	-0.308372	-0.400197	-0.091825	21.4421	5.89992	0.00607942	0.251216
CBX5	0.042493	-0.543352	-0.455393	-0.12264	0.165133	-0.420712	-0.332753	-0.585845	-0.497886	0.0879584	20.6771	5.89466	0.00610078	0.251216
AHNAK	0.288254	0.0242767	-0.0841116	0.474793	-0.18654	-0.450517	-0.558905	-0.263977	-0.372365	-0.108388	24.8981	5.88123	0.00615567	0.251613
NDUFB8	0.695325	0.0352779	0.32169	0.276964	0.418361	-0.241686	0.0447258	-0.660047	-0.373635	0.286412	21.7649	5.83328	0.00635639	0.257921
SCO2	1.27448	-0.11677	-0.438945	0.343675	0.930802	-0.460445	-0.78262	-1.39125	-1.71342	-0.322175	17.3299	5.80615	0.00647323	0.258469
EMC9	2.05622	0.358714	1.66062	-0.118413	2.17463	0.477126	1.77903	-1.6975	-0.3956	1.3019	17.352	5.80242	0.0064895	0.258469
CALD1	0.420854	-0.059798	0.0643104	0.322947	0.0979077	-0.382745	-0.258636	-0.480652	-0.356544	0.124108	22.0431	5.79787	0.00650938	0.258469
DIAPH1	0.181253	0.349841	0.52094	0.0426134	0.138639	0.307227	0.478327	0.168588	0.339688	0.1711	20.7336	5.77833	0.00659567	0.260038
GABPA	-0.753389	-0.847265	-0.859885	-0.681897	-0.0714927	-0.165369	-0.177988	-0.0938761	-0.106496	-0.0126196	19.2507	5.73429	0.00679487	0.264815
SERPINH1	0.0339272	0.0939073	0.21737	-0.0666961	0.100623	0.160603	0.284066	0.0599801	0.183443	0.123462	24.7355	5.73055	0.00681212	0.264815
ARPC1B	0.147402	-0.143628	0.198268	-0.01028	0.157682	-0.133347	0.208548	-0.291029	0.0508666	0.341896	21.3196	5.69703	0.00696883	0.269026
LRRN1	2.54438	0.0641158	0.921408	0.547963	1.99642	-0.483848	0.373445	-2.48027	-1.62297	0.857292	17.5167	5.68496	0.0070263	0.269055
KRT17	0.404306	-0.0641233	0.306578	0.314173	0.0901337	-0.378296	-0.00759503	-0.46843	-0.0977287	0.370701	24.0336	5.6766	0.00706637	0.269055
SRI	0.436066	-0.218142	-0.249197	0.333125	0.102941	-0.551267	-0.582321	-0.654208	-0.685263	-0.0310549	22.2889	5.63301	0.00727979	0.275295
UAP1	-0.405766	-0.18291	-0.389501	-0.553465	0.147699	0.370555	0.163963	0.222856	0.0162646	-0.206591	20.6344	5.62111	0.00733935	0.275672
YTHDF1	0.276078	-0.280581	-0.328979	0.151454	0.124624	-0.432035	-0.480433	-0.556659	-0.605057	-0.0483978	19.4528	5.57369	0.00758217	0.282721
MYL6	0.324053	0.0588375	0.122887	0.366697	-0.0426436	-0.307859	-0.243809	-0.265216	-0.201166	0.0640499	24.0824	5.5648	0.00762875	0.282721
ATP5PF	0.520267	-0.026306	-0.192441	0.574174	-0.0539074	-0.60048	-0.766615	-0.546573	-0.712707	-0.166135	23.2621	5.53648	0.00792859	0.29045
IFNGR1	1.19793	0.259975	1.63521	1.34677	-0.148838	-1.08679	0.288448	-0.937953	0.437286	1.37524	17.4794	5.50391	0.00795647	0.29045
SORT1	0.303854	0.288181	0.55028	0.440512	-0.136658	-0.152331	0.109768	-0.0156729	0.246427	0.262099	19.7875	5.49711	0.00799404	0.29045
ALDOC	0.161385	0.473324	0.756825	0.0921302	0.0692545	0.381194	0.664695	0.31194	0.59544	0.283501	21.7642	5.47926	0.00809373	0.292163
PRTFDC1	-0.201611	0.403302	0.378318	-0.14358	-0.0580315	0.546881	0.521898	0.604913	0.57993	-0.0249834	19.7114	5.46629	0.00816702	0.292871
COL6A1	-0.106997	0.50908	0.567625	0.133014	-0.240011	0.376067	0.434611	0.616077	0.674622	0.0585446	19.6648	5.45359	0.00823952	0.292871
NCOA6	1.80517	0.0307147	-0.240431	-0.206945	2.01212	0.23766	-0.0334851	-1.77446	-2.04561	-0.271145	18.2355	5.44805	0.00827141	0.292871
OGA	-0.387735	0.492949	-0.131762	0.0126717	-0.400407	0.480277	-0.144434	0.880684	0.255973	-0.624711	19.2983	5.40152	0.0085446	0.300629
PDLIM2	0.118444	-0.342045	-0.470159	-0.207309	0.325753	-0.134736	-0.26285	-0.460489	-0.588603	-0.128114	20.9886	5.38188	0.00866304	0.302462
CARHSP1	0.933917	1.46258	0.647819	1.49654	-0.562625	-0.0339576	-0.848723	0.528668	-0.286098	-0.814766	20.2464	5.40291	0.00878581	0.302462
RPAP2	-1.18041	-0.342701	-1.14848	-1.42294	0.242531	1.08024	0.274455	0.837706	0.0319233	-0.805782	16.9036	5.3606	0.00879349	0.302462
PSMB4	-0.283033	-0.0739115	-0.237642	-0.415019	0.131987	0.341108	0.177377	0.209121	0.0453903	-0.163731	21.9267	5.35723	0.00881432	0.302462
CYP20A1	-0.749693	-2.03234	0.136431	0.155983	-0.905676	-2.18832	-0.0195514	-1.28264	0.886124	2.16877	16.4011	5.34762	0.00887413	0.302646
CLPB	0.122331	0.0229425	0.354039	-0.0943468	0.216678	0.117289	0.448385	-0.0993885	0.231708	0.331096	21.278	5.28553	0.00927193	0.314285
ATL2	0.137711	0.365243	0.512201	0.166236	-0.0285252	0.199006	0.345964	0.227532	0.37449	0.146958	20.6088	5.27408	0.00934748	0.314808
SLC30A9	-0.596458	0.00980931	-0.634449	0.183836	-0.780294	-0.174027	-0.818285	0.606267	-0.0379908	-0.644258	18.9099	5.26609	0.00940064	0.314808
ATXN10	-0.551409	-0.083908	-0.488877	-0.397688	-0.153721	0.31378	-0.0911891	0.467501	0.0625318	-0.404969	19.8255	5.24878	0.00951693	0.315803
ATF2	1.74156	0.674157	1.59374	2.13994	-0.398387	-1.46579	-0.54621	-1.0674	-0.147823	0.919578	16.4996	5.23297	0.00962464	0.315803
SLC16A2	1.60441	-0.425179	0.200022	0.691311	0.913098	-1.11649	-0.491289	-2.02959	-1.40439	0.625201	18.1659	5.23117	0.00963696	0.315803
MRPS14	-0.113674	0.420035	-0.0919154	-0.0449707	-0.0687031	0.465006	-0.0469446	0.533709	0.0217584	-0.511951	19.9464	5.22817	0.00965759	0.315803
SLC9A3R1	0.180468	-0.104883	-0.043137	0.365358	-0.18489	-0.470241	-0.408495	-0.285351	-0.223605	0.0617463	21.8097	5.21611	0.00974101	0.316668
TIMM13	0.397042	0.0602385	-0.0504557	0.285093	0.11195	-0.224854	-0.335548	-0.336804	-0.447498	-0.110694	21.3026	5.19008	0.00992389	0.320738
ALDH6A1	-0.284209	0.186019	0.00765218	0.0315556	-0.315765	0.154464	-0.0239034	0.470228	0.291861	-0.178367	21.432	5.13929	0.0102921	0.330714
LAP3	-0.0138889	0.198061	0.199547	-0.016567	0.00267802	0.214628	0.216114	0.21195	0.213436	0.00148551	21.6766	5.12287	0.0104145	0.331509
FAM98A	-0.14612	-0.26557	-0.595159	-0.18723	0.04111	-0.0783401	-0.40793	-0.11945	-0.44904	-0.329589	20.1611	5.11999	0.0104361	0.331509
S100A13	0.328618	-0.0751481	0.0794788	0.560073	-0.231455	-0.635221	-0.480594	-0.403766	-0.249139	0.154627	21.4681	5.08586	0.0106964	0.337848
DDX6	-0.203945	-0.301248	-0.328668	-0.0894419	-0.114503	-0.211806	-0.239226	-0.0973028	-0.124723	-0.0274207	21.1897	5.06116	0.0108895	0.339777
NFIB	-0.138278	0.222311	1.55485	0.0720146	-0.210293	0.150297	1.48284	0.36059	1.69313	1.33254	18.3997	5.05674	0.0109244	0.339777
NAB2	0.258244	0.305338	0.526972	0.423843	-0.165599	-0.118506	0.103128	0.0470937	0.268728	0.221634	20.4218	5.05467	0.0109408	0.339777
RMC1	-0.206977	0.120471	0.136431	-1.02389	0.816918	1.14437	1.16033	0.327448	0.343408	0.01596	16.0979	5.04189	0.0110428	0.341017
COL1A1	0.699543	0.244488	0.406741	0.894867	-0.195324	-0.650379	-0.488126	-0.455055	-0.292802	0.162252	21.776	5.03449	0.0111034	0.341017
MGME1	-0.973867	-0.0119526	-0.650165	-0.129179	-0.844688	0.117227	-0.520986	0.961914	0.323702	-0.638213	19.1879	4.98713	0.0114923	0.351021
ARID5B	0.115222	0.119033	0.136431	-1.76627	1.88149	1.88531	1.9027	0.00381145	0.0212093	0.0173979	16.1823	4.96361	0.0116918	0.355162
RRP7A	-1.05731	-0.751803	-0.842065	-1.02761	-0.0297031	0.275806	0.185544	0.305509	0.215247	-0.0902628	18.7506	4.9235	0.0120411	0.363786
TRUB1	0.248419	0.742941	0.764452	-0.121936	0.370355	0.864877	0.886388	0.494522	0.516033	0.0215114	18.8878	4.90296	0.0122246	0.367334
POGZ	0.108731	0.185905	0.408655	0.0491057	0.0596253	0.1368	0.359549	0.0771744	0.299924	0.222749	19.8615	4.86467	0.0125754	0.375841
SLC39A11	-0.24201	0.357787	0.310013	0.00284335	-0.244854	0.354944	0.307169	0.599798	0.552023	-0.0477746	19.7487	4.85713	0.0126458	0.375924
SLC6A8	0.604281	-2.08688	-1.07159	-1.58337	2.18765	-0.503517	0.511774	-2.69116	-1.67587	1.01529	17.658	4.81904	0.0130084	0.383828
CNP	0.11783	0.121913	0.394962	0.193129	-0.0752986	-0.0712156	0.201833	0.004083	0.277132	0.273049	21.8853	4.81477	0.0130497	0.383828
EIF3J	-0.152793	-0.190877	-0.283507	-0.293183	0.14039	0.102306	0.00967635	-0.0380844	-0.130714	-0.0926297	22.4666	4.80029	0.0131912	0.384983
LARS1	-0.229913	-0.0210103	-0.176424	-0.275693	0.0457801	0.254683	0.0992695	0.208903	0.0534895	-0.155413	22.9705	4.79661	0.0132275	0.384983
LAMB1	0.323611	-0.190705	0.336617	0.195408	0.128203	-0.386113	0.141209	-0.514316	0.0130059	0.527322	20.1598	4.77349	0.0134578	0.389644
MRPL12	0.0626205	-0.0696386	-0.291911	0.168006	-0.105385	-0.237644	-0.459916	-0.132259	-0.354531	-0.222272	22.5632	4.73468	0.0138546	0.399055
GSTK1	-0.0322831	-0.323995	-0.267013	0.101002	-0.133285	-0.424996	-0.368014	-0.291712	-0.23473	0.0569821	20.6451	4.69979	0.0142229	0.401351
AK1	0.294921	-0.0416143	-0.158059	0.212309	0.0826115	-0.253924	-0.370368	-0.336535	-0.452979	-0.116444	20.6132	4.69846	0.0142372	0.401351
GTF2A1	0.115222	-1.32806	-1.76203	0.155983	-0.0407607	-1.48405	-1.91801	-1.44329	-1.87725	-0.433968	16.4669	4.69274	0.0142987	0.401351
ITGB4	0.515325	-0.355952	0.196706	0.564009	-0.0486841	-0.919961	-0.367303	-0.871277	-0.318619	0.552658	18.6213	4.68744	0.0143559	0.401351
SPAG9	-0.29871	0.0119594	-0.0312822	-0.0790669	-0.219643	0.0910263	0.0477847	0.310669	0.267427	-0.0432416	21.1088	4.67771	0.0144617	0.401351
DCAKD	0.177942	1.29015	-0.233402	0.0745001	0.103442	1.21565	-0.307902	1.11221	-0.411344	-1.52356	17.8812	4.67711	0.0144683	0.401351
TMEM30A	0.842825	-0.0399575	0.348875	0.429132	0.413693	-0.46909	-0.0802572	-0.882782	-0.49395	0.388832	20.2196	4.67643	0.0144758	0.401351
CD55	3.02373	-0.137338	0.825489	1.39898	1.62476	-1.53631	-0.573486	-3.16107	-2.19824	0.962827	16.0596	4.67313	0.0145119	0.401351
ABCC10	1.13328	1.1371	1.15449	-1.04342	2.17671	2.18052	2.19792	0.00381145	0.0212093	0.0173979	16.4449	4.66418	0.0146103	0.401411
PTK7	0.0825796	-0.306655	-0.098975	0.122378	-0.0397989	-0.429033	-0.221353	-0.389235	-0.181555	0.20768	20.4858	4.65983	0.0146585	0.401411
UQCR10	0.808989	-0.23206	0.389612	-0.130964	0.939953	-0.101097	0.520575	-1.04105	-0.419377	0.621672	18.9754	4.63758	0.0149077	0.405922
ORC6	0.212003	0.213774	-1.32663	-0.240785	0.452789	0.45456	-1.08585	0.00177104	-1.53864	-1.54041	16.4731	4.63214	0.0149693	0.405922
PM20D2	-0.52628	0.121793	-0.0913006	-0.0376958	-0.488584	0.159488	-0.0536049	0.648072	0.434979	-0.213093	20.2355	4.62014	0.0151063	0.407441
HEATR1	-0.397228	-0.322353	-0.252675	-0.41456	0.0173319	0.0922066	0.161884	0.0748747	0.144552	0.0696778	20.5914	4.61265	0.0151925	0.407441
DUSP15	0.402503	0.738135	1.38832	1.89623	-1.49373	-1.1581	-0.507918	0.335632	0.985814	0.650182	16.7584	4.6081	0.0152451	0.407441
C11orf68	-0.162258	-0.321797	-0.457714	-0.339166	0.176908	0.0173695	-0.118547	-0.159538	-0.295455	-0.135917	20.8252	4.5934	0.0154167	0.408939
TXLNG	-0.0260596	0.675252	-0.0921795	-0.0690935	0.043034	0.744346	-0.023086	0.701312	-0.0661199	-0.767432	18.3127	4.58934	0.0154645	0.408939
NFIX	0.993489	-0.188211	1.15065	1.57694	-0.583455	-1.76516	-0.42629	-1.1817	0.157165	1.33887	17.3619	4.58449	0.0155219	0.408939
MLF2	0.672437	0.268263	0.570981	0.175955	0.496482	0.0923087	0.395026	-0.404174	-0.101456	0.302718	20.4213	4.56055	0.0158082	0.412451
RCN3	0.0723879	-0.131642	-0.122261	0.250134	-0.177746	-0.381776	-0.372395	-0.20403	-0.194649	0.00938067	22.2495	4.55308	0.0158988	0.412451
HSPB1	0.284153	0.191568	0.38639	0.0753153	0.208838	0.116252	0.311075	-0.0925854	0.102237	0.194822	26.551	4.55071	0.0159277	0.412451
PRMT5	-0.336374	-0.287304	-0.147002	-0.276367	-0.0600077	-0.0109375	0.129364	0.0490702	0.189372	0.140302	22.194	4.54872	0.015952	0.412451
SLC30A1	0.23468	0.512966	0.631336	0.26626	-0.0315799	0.246706	0.365076	0.278286	0.396656	0.11837	21.4141	4.5236	0.0162621	0.416859
SH3BGRL3	0.700771	0.183515	0.244437	0.532722	0.168048	-0.349207	-0.288285	-0.517255	-0.456333	0.0609218	21.279	4.52278	0.0162724	0.416859
MYL6B	-0.334393	-0.698067	-1.07905	-0.423286	0.0888934	-0.274781	-0.655768	-0.363675	-0.744661	-0.380986	19.6256	4.49566	0.0166153	0.421942
PVR	-0.499669	-0.325311	-0.195427	-0.625005	0.125336	0.299695	0.429578	0.174358	0.304242	0.129883	20.9933	4.49475	0.016627	0.421942
TUSC3	0.145574	0.528334	0.83606	0.962215	-0.816641	-0.433881	-0.126155	0.38276	0.690486	0.307726	18.8918	4.47807	0.0168421	0.421942
TRMT10C	-0.359717	-0.497491	-0.568899	-0.360526	0.00080902	-0.136965	-0.208373	-0.137774	-0.209182	-0.071408	20.7335	4.4725	0.0169147	0.421942
UBA2	-0.267324	0.142448	0.131306	-0.107581	-0.159743	0.250029	0.238887	0.409772	0.39863	-0.0111419	21.8791	4.47242	0.0169158	0.421942
COX5A	0.207498	-0.178025	-0.147985	0.635071	-0.427573	-0.813096	-0.783057	-0.385523	-0.355484	0.0300395	22.2878	4.46643	0.0171778	0.421942
PGAM5	-0.0794943	-0.344138	-0.313681	-0.254036	0.174541	-0.0901026	-0.059645	-0.264644	-0.234186	0.0304575	21.7608	4.45148	0.0171917	0.421942
ELFN1	0.151727	-0.503387	0.0593523	0.416308	-0.264582	-0.919695	-0.356956	-0.655113	-0.0923742	0.562739	18.4177	4.44843	0.0172324	0.421942
TRAPPC6B	-0.213899	0.930737	1.99802	0.163352	-0.377251	0.767385	1.83466	1.14464	2.21192	1.06728	17.7695	4.4475	0.0172448	0.421942
FAM136A	0.333217	-0.0801626	0.0925813	0.0650173	0.2682	-0.14518	0.0275641	-0.41338	-0.240636	0.172744	20.9644	4.44393	0.0172925	0.421942
EIF3C	-0.293232	-0.789539	-0.94251	-0.9152	0.621967	0.12566	-0.02731	-0.496307	-0.649277	-0.15297	20.9638	4.4614	0.0173058	0.421942
ACYP2	0.729565	-0.880593	-0.288638	1.06883	-0.339262	-1.94942	-1.35747	-1.61016	-1.0182	0.591954	16.6902	4.42557	0.0175405	0.425797
LOXL4	0.751229	0.956871	2.02561	0.718218	0.033011	0.238653	1.30739	0.205642	1.27438	1.06874	16.9019	4.37782	0.0182043	0.439991
PMEPA1	0.50746	-0.109719	0.645984	0.652958	-0.145498	-0.762677	-0.00697456	-0.617179	0.138524	0.755703	20.8735	4.36577	0.0183764	0.440633
CSTA	0.115871	0.119033	-0.539575	-1.09991	1.21578	1.21894	0.560333	0.00316274	-0.655446	-0.658608	16.1841	4.36487	0.0183894	0.440633
FAR1	0.463249	-0.026672	0.31018	0.723996	-0.260747	-0.750668	-0.413817	-0.489921	-0.15307	0.336852	18.7116	4.35191	0.0185766	0.441874
ACTR10	0.256488	0.449898	0.326713	0.230728	0.0257599	0.21917	0.0959851	0.19341	0.0702253	-0.123185	20.8847	4.35029	0.0186002	0.441874
TIMM44	-0.168118	0.133453	0.0768287	-0.0947474	-0.0733705	0.2282	0.171576	0.301571	0.244947	-0.056624	20.7141	4.33022	0.0188949	0.446966
LGMN	0.571817	-1.18675	0.376659	-0.16366	0.735477	-1.02309	0.540319	-1.75857	-0.195158	1.56341	16.4401	4.31013	0.0191953	0.452147
QTRT1	-0.455353	0.078396	-0.0783408	-0.362161	-0.0931915	0.440557	0.28382	0.533749	0.377012	-0.156737	19.2531	4.29808	0.0193781	0.454526
DYNLL2	-0.143798	-0.59496	0.00445586	-0.293905	0.150107	-0.301055	0.298361	-0.451162	0.148254	0.599415	21.9622	4.29082	0.0194891	0.45521
BANF1	0.223149	-0.295815	-0.431261	0.298931	-0.0757825	-0.594746	-0.730193	-0.518964	-0.65441	-0.135447	21.7156	4.26656	0.0198656	0.462062
NBR1	-0.16111	-0.35522	0.908051	0.13593	-0.29704	-0.49115	0.77212	-0.19411	1.06916	1.26327	18.2889	4.25162	0.0201015	0.465602
RECQL5	-0.287219	-1.34129	-2.09349	-1.6633	1.37608	0.322006	-0.430196	-1.05407	-1.80627	-0.752203	16.9802	4.24202	0.0202549	0.467208
SEC62	0.150154	0.00161905	0.537994	0.0868531	0.063301	-0.085234	0.451141	-0.148535	0.38784	0.536375	19.7067	4.2188	0.0206313	0.471269
PDP1	-0.0344504	0.475345	0.143323	0.105945	-0.140396	0.3694	0.0373779	0.509796	0.177774	-0.332022	19.593	4.2138	0.0207134	0.471269
DNAJC19	-0.641959	-0.333842	-0.414668	-0.761272	0.119313	0.42743	0.346604	0.308118	0.227291	-0.0808263	20.9513	4.21093	0.0207605	0.471269
SUCLG2	-0.114672	-0.0573489	-0.331253	-0.0370334	-0.0776382	-0.0203155	-0.29422	0.0573227	-0.216582	-0.273904	21.0622	4.21036	0.0207701	0.471269
SERPINB6	-0.425418	-0.252359	-0.285943	-0.446286	0.0208679	0.193927	0.160343	0.173059	0.139475	-0.0335844	20.2143	4.20385	0.0208777	0.471786
BAX	-0.0649343	-0.0514756	-0.215404	0.159722	-0.224656	-0.211198	-0.375126	0.0134587	-0.150469	-0.163928	22.092	4.19544	0.021018	0.472303
LAMA1	1.16888	0.20862	1.35862	1.17317	-0.00428105	-0.964546	0.18545	-0.960265	0.189731	1.15	17.1755	4.18916	0.0211233	0.472303
RAC2	1.52255	-0.440624	1.11829	0.334269	1.18828	-0.774893	0.784023	-1.96317	-0.404256	1.55892	16.8036	4.1849	0.0211952	0.472303
TSTD1	1.28203	-0.714913	-0.766945	0.0261195	1.25592	-0.741033	-0.793065	-1.99695	-2.04898	-0.0520318	18.1464	4.17931	0.0212897	0.472303
LGALS3	0.506223	0.220093	0.502501	0.400481	0.105742	-0.180388	0.10202	-0.28613	-0.00372235	0.282408	22.3533	4.17721	0.0213254	0.472303
PHF20L1	1.41467	0.470611	0.279246	0.583413	0.831257	-0.112802	-0.304167	-0.944059	-1.13542	-0.191365	16.871	4.17013	0.0214464	0.473097
NDUFA10	0.174658	0.0781449	0.361073	0.134819	0.0398395	-0.056674	0.226254	-0.0965135	0.186415	0.282928	21.3887	4.1584	0.0216481	0.47566
NOTCH2	0.405492	-0.158731	0.297877	0.28715	0.118342	-0.44588	0.0107276	-0.564223	-0.107615	0.456608	18.9427	4.14233	0.0219283	0.476106
MFN2	-0.0742393	-0.130764	0.261541	-0.375785	0.301545	0.24502	0.637325	-0.0565251	0.33578	0.392305	19.4022	4.14197	0.0219347	0.476106
MRPL49	-0.104097	-0.416597	-0.418551	-0.0425087	-0.0615881	-0.374089	-0.376043	-0.3125	-0.314454	-0.00195405	20.3527	4.13366	0.0220811	0.476106
GNG12	0.54606	-0.58267	-0.647451	0.14744	0.39862	-0.730109	-0.794891	-1.12873	-1.19351	-0.0647815	20.1665	4.14474	0.0221695	0.476106
GNAS	-0.0646501	0.121084	0.043361	0.367075	-0.431726	-0.245992	-0.323714	0.185734	0.108011	-0.0777229	21.6611	4.12645	0.0222091	0.476106
CENPVL3	-1.89512	-1.30706	-2.21901	-1.878	-0.0171199	0.570945	-0.341004	0.588064	-0.323885	-0.911949	16.1193	4.12602	0.0222168	0.476106
SYT11	1.05669	0.373055	1.20826	0.685244	0.371447	-0.312189	0.523016	-0.683635	0.151569	0.835204	18.5439	4.12299	0.022271	0.476106
ASPM	0.703805	-1.07233	-1.00487	-1.07078	1.77458	-0.00155586	0.0659085	-1.77614	-1.70867	0.0674644	18.4874	4.1171	0.0223764	0.476106
RSL24D1	-0.27957	0.522077	-0.103791	0.0210098	-0.300579	0.501068	-0.124801	0.801647	0.175779	-0.625868	19.4492	4.11361	0.0224393	0.476106
SPC25	-0.533431	-0.572471	-0.0104901	-0.554714	0.021283	-0.0177575	0.544224	-0.0390404	0.522941	0.561981	18.7192	4.10316	0.0226286	0.477499
PACC1	0.418514	1.71543	1.02955	-0.402897	0.821411	2.11833	1.43244	1.29692	0.611033	-0.685887	16.9474	4.10052	0.0226767	0.477499
EIF2B2	-0.309081	-0.226637	-0.240802	-0.245788	-0.0632929	0.0191515	0.00498594	0.0824444	0.0682788	-0.0141656	20.6676	4.09224	0.0228282	0.477722
WDR46	-0.562002	-0.359881	-0.32665	-0.664044	0.102042	0.304162	0.337393	0.202121	0.235352	0.0332309	20.1649	4.09056	0.0228592	0.477722
UAP1L1	0.363511	0.0333142	0.339915	0.353215	0.0102957	-0.319901	-0.0132997	-0.330197	-0.0235954	0.306601	19.5638	4.07477	0.023152	0.48203
RBBP7	0.163714	0.252769	0.335947	0.0519129	0.111801	0.200856	0.284034	0.0890557	0.172234	0.0831779	22.7165	4.06861	0.0232673	0.482283
CYBRD1	0.195107	0.459107	0.408179	0.242449	-0.0473428	0.216658	0.16573	0.264	0.213073	-0.0509278	20.6222	4.06256	0.0233814	0.482283
GFM1	0.071724	0.378772	0.239424	0.0699384	0.00178557	0.308834	0.169486	0.307048	0.1677	-0.139348	21.0446	4.06028	0.0234244	0.482283
ALDH1L2	-0.695771	-0.260464	-0.476738	-1.02897	0.333194	0.768501	0.552227	0.435307	0.219033	-0.216274	18.7138	4.05405	0.0235426	0.482928
H1-0	0.336895	0.00783099	0.028254	0.047588	0.289307	-0.039757	-0.019334	-0.329064	-0.308641	0.020423	24.4141	4.04218	0.0237699	0.482951
CLIP1	-0.0759873	0.237313	0.329377	-0.13084	0.0548528	0.368153	0.460217	0.3133	0.405364	0.0920635	19.7552	4.0408	0.0237965	0.482951
MPG	0.268619	0.0823643	0.246385	0.355161	-0.0865413	-0.272796	-0.108775	-0.186255	-0.0222342	0.164021	20.9692	4.03233	0.0239605	0.482951
KRT80	-0.254248	-0.057291	-0.667585	-0.343336	0.0890882	0.286045	-0.324249	0.196957	-0.413337	-0.610294	19.2793	4.03071	0.0239918	0.482951
FASN	0.385678	0.085821	0.222506	0.321878	0.0638005	-0.236057	-0.0993716	-0.299857	-0.163172	0.136685	24.2868	4.02011	0.0241991	0.482951
AAR2	-1.4095	-1.43522	0.136431	-4.10016	2.69066	2.66494	4.23659	-0.0257189	1.54593	1.57165	17.2648	4.04157	0.0242072	0.482951
LZTFL1	-0.00450919	0.440199	0.248275	0.278378	-0.282887	0.16182	-0.0301035	0.444708	0.252784	-0.191924	19.8979	4.01906	0.0242197	0.482951
S100A6	0.597056	0.0510559	-0.108326	0.565896	0.0311602	-0.51484	-0.674222	-0.546	-0.705382	-0.159382	24.2729	4.04132	0.0242574	0.482951
ERAP1	-0.0955567	0.0967488	0.361049	-0.32095	0.225393	0.417699	0.681999	0.192306	0.456606	0.2643	19.2901	4.0103	0.0243927	0.482951
MMP14	0.333419	-0.0632678	0.0911946	0.308311	0.0251081	-0.371579	-0.217117	-0.396687	-0.242225	0.154462	21.2367	3.99484	0.0247013	0.482951
MINDY3	-0.067616	-0.147181	-0.156839	-1.11301	1.04539	0.965826	0.956168	-0.0795648	-0.0892231	-0.00965823	16.0172	3.9821	0.0249591	0.482951
ARSA	-0.361042	-0.511175	-0.788024	-0.0328934	-0.328149	-0.478281	-0.75513	-0.150133	-0.426981	-0.276849	18.3262	3.98203	0.0249606	0.482951
ARFIP1	-0.60088	-0.5345	-0.438965	-0.253112	-0.347767	-0.281388	-0.185852	0.0663795	0.161915	0.0955351	19.2766	3.98198	0.0249614	0.482951
S100A16	0.317359	-0.289138	-0.113039	0.391124	-0.0737642	-0.680262	-0.504163	-0.606498	-0.430399	0.176099	20.2338	3.98048	0.0249921	0.482951
TARS3	1.82563	0.619665	-0.599726	0.157581	1.66805	0.462084	-0.757307	-1.20596	-2.42536	-1.21939	17.2129	3.98024	0.0249969	0.482951
TUBB2A	0.203557	-0.0305037	0.363226	0.134247	0.06931	-0.164751	0.228979	-0.234061	0.159669	0.39373	20.2055	3.97126	0.0251808	0.482951
MTCH2	-0.108896	-0.153637	0.141515	0.379145	-0.488041	-0.532783	-0.237631	-0.0447417	0.25041	0.295152	20.8269	3.96263	0.0253589	0.482951
STAT3	0.0867938	-0.088203	0.0298169	0.322428	-0.235634	-0.410631	-0.292611	-0.174997	-0.0569769	0.11802	20.4427	3.96257	0.0253601	0.482951
PRRC1	0.0746657	0.173705	0.512518	0.138558	-0.0638919	0.0351473	0.37396	0.0990393	0.437852	0.338813	20.2981	3.9592	0.02543	0.482951
MICAL2	-0.110159	0.504819	0.697313	-0.20403	0.0938712	0.70885	0.901343	0.614978	0.807472	0.192493	19.4365	3.95887	0.025437	0.482951
APOB	0.079162	-0.118685	0.397455	-0.049816	0.128978	-0.068869	0.447271	-0.197847	0.318293	0.51614	21.0622	3.95834	0.025448	0.482951
SRSF9	0.042666	-0.18755	-0.115919	-0.0078275	0.0504935	-0.179722	-0.108092	-0.230216	-0.158586	0.0716303	22.5511	3.958	0.025455	0.482951
CAP1	-0.0113331	0.192376	0.280374	0.0678353	-0.0791684	0.12454	0.212538	0.203709	0.291707	0.0879978	22.9765	3.93533	0.0259317	0.489755
GEMIN8	-0.930916	-0.324006	-2.06931	-1.31003	0.37911	0.98602	-0.759289	0.60691	-1.1384	-1.74531	16.8548	3.9326	0.0259899	0.489755
TSC22D3	0.000549433	-1.56242	-1.76446	-0.198655	0.199205	-1.36376	-1.56581	-1.56297	-1.76501	-0.202044	17.1103	3.91881	0.0262855	0.492868
PPFIBP1	0.155565	0.100619	0.223924	0.419706	-0.264141	-0.319087	-0.195782	-0.0549462	0.0683589	0.123305	20.3159	3.91664	0.0263324	0.492868
ENGASE	-0.0584129	-0.974696	-1.61061	-0.864913	0.806501	-0.109783	-0.745694	-0.916283	-1.55219	-0.635912	16.6049	3.90375	0.026613	0.495149
ESD	-0.027332	0.162454	0.271898	0.061841	-0.089173	0.100613	0.210057	0.189786	0.29923	0.109444	21.8527	3.90192	0.0266529	0.495149
TMEM160	-0.723456	0.251901	-0.99108	-0.601071	-0.122385	0.852972	-0.390009	0.975357	-0.267624	-1.24298	18.2801	3.89717	0.0267574	0.495149
CHMP3	0.081699	-0.23794	-0.198004	0.0876342	-0.00593518	-0.325574	-0.285638	-0.319639	-0.279703	0.0399355	20.4823	3.89476	0.0268105	0.495149
ITM2C	0.550133	-0.390193	0.590675	0.425261	0.124872	-0.815455	0.165413	-0.940326	0.0405419	0.980868	20.1309	3.88898	0.0269403	0.495898
CDKN1A	0.271394	-0.489031	-0.285072	1.18875	-0.917357	-1.67778	-1.47382	-0.760425	-0.556466	0.203958	19.8168	3.91576	0.027253	0.498412
SAV1	0.469894	0.468388	1.08123	1.49992	-1.03003	-1.03154	-0.418694	-0.00150564	0.611337	0.612842	15.9489	3.87167	0.0273258	0.498412
CALR	0.284031	0.0533317	0.12159	0.234762	0.0492697	-0.18143	-0.113172	-0.2307	-0.162441	0.0682584	26.0977	3.86708	0.0274296	0.498412
VTI1B	0.239731	-0.144375	-0.273303	0.138332	0.101399	-0.282707	-0.411636	-0.384106	-0.513035	-0.128928	20.3377	3.86682	0.0274355	0.498412
PCNT	-1.46183	0.331209	-0.222373	-1.01202	-0.44981	1.34323	0.789648	1.79304	1.23946	-0.553582	16.5883	3.86106	0.0275664	0.49873
CHAMP1	0.251787	0.457556	0.572995	0.241031	0.0107558	0.216525	0.331963	0.205769	0.321208	0.115439	20.2509	3.85816	0.0276325	0.49873
EEF1AKNMT	0.3747	-0.202409	1.09569	0.0912668	0.283433	-0.293676	1.00443	-0.577109	0.720994	1.2981	18.0241	3.84702	0.0278883	0.501718
LSG1	-0.255685	-0.234001	-0.257797	-0.359678	0.103992	0.125676	0.101881	0.0216837	-0.00211158	-0.0237953	20.9945	3.8318	0.0282423	0.50542
FMNL1	0.358001	0.0566096	0.0328101	-0.360594	0.718595	0.417203	0.393404	-0.301392	-0.325191	-0.0237995	19.1334	3.82827	0.0283251	0.50542
PITHD1	-0.30044	-0.00808741	-0.0591897	-0.315937	0.0154974	0.30785	0.256748	0.292352	0.24125	-0.0511023	20.1463	3.8265	0.0283668	0.50542
TBX3	0.815146	1.17794	2.15622	0.846673	-0.0315274	0.331268	1.30954	0.362795	1.34107	0.978277	16.7676	3.81575	0.0286211	0.508322
PDLIM7	-0.154435	-0.147479	-0.417823	-0.257501	0.103066	0.110022	-0.160322	0.00695597	-0.263388	-0.270344	22.9482	3.80926	0.0287759	0.509444
PI4K2A	0.341402	0.0191234	0.320535	0.364585	-0.0231831	-0.345462	-0.0440503	-0.322279	-0.0208672	0.301412	20.9928	3.80271	0.0289329	0.510597
TMEM126A	-0.395424	-0.110315	-0.239589	-0.177965	-0.217459	0.0676499	-0.0616241	0.285108	0.155834	-0.129274	20.7371	3.78861	0.0292749	0.514433
ANXA3	-0.204906	0.0926742	0.123892	-0.216689	0.0117827	0.309363	0.340581	0.29758	0.328798	0.0312181	21.1745	3.78332	0.0294042	0.514433
TPM1	-0.136993	-0.210132	-0.331454	-0.0565816	-0.0804116	-0.15355	-0.274872	-0.0731388	-0.194461	-0.121322	23.7566	3.78235	0.0294279	0.514433
LRP10	0.492766	-0.242503	0.464343	0.83681	-0.344044	-1.07931	-0.372467	-0.735268	-0.0284228	0.706846	18.7388	3.77497	0.0296097	0.515989
LAPTM4A	1.09731	0.266877	0.9675	1.57584	-0.478533	-1.30897	-0.608343	-0.830432	-0.12981	0.700622	18.2896	3.76866	0.0297661	0.517079
DYNC1LI2	-0.0820341	-0.207635	-0.371529	0.0133948	-0.0954288	-0.22103	-0.384923	-0.125601	-0.289495	-0.163894	20.5485	3.76496	0.0298583	0.517079
DPY30	0.411646	-0.0723336	0.0618661	0.130886	0.28076	-0.203219	-0.0690196	-0.483979	-0.34978	0.1342	22.4755	3.75229	0.0301763	0.520963
MED15	-0.130177	-0.239032	-0.595887	-0.298661	0.168484	0.0596289	-0.297226	-0.108855	-0.46571	-0.356855	19.7964	3.74736	0.0303011	0.521498
XPO5	-0.100629	0.237992	0.38724	0.00762801	-0.108257	0.230364	0.379612	0.338621	0.487869	0.149248	20.3153	3.73641	0.0305803	0.524095
HDHD2	1.24455	-0.045648	-0.451075	-0.0442809	1.28883	-0.00136717	-0.406794	-1.2902	-1.69562	-0.405427	18.5148	3.73022	0.0307395	0.524095
TMUB1	0.221259	-0.338961	0.199709	0.39478	-0.173521	-0.733741	-0.195072	-0.56022	-0.0215506	0.53867	19.5547	3.71798	0.0310571	0.524095
TMED7	1.49343	-0.684687	0.128946	0.238196	1.25524	-0.922883	-0.10925	-2.17812	-1.36449	0.813633	18.2487	3.71407	0.0311593	0.524095
SMARCAD1	-0.21617	-1.28216	-1.37467	-1.10407	0.887903	-0.178092	-0.270601	-1.066	-1.1585	-0.0925089	17.0584	3.7135	0.0311742	0.524095
PGM3	-0.082088	0.293236	0.228419	-0.16938	0.0872917	0.462616	0.397799	0.375324	0.310507	-0.0648166	20.3843	3.71292	0.0311893	0.524095
MAP1A	0.344362	0.212669	0.0609067	0.418276	-0.0739145	-0.205607	-0.357369	-0.131693	-0.283455	-0.151762	19.6587	3.71009	0.0312638	0.524095
RAB12	-0.105516	0.320492	0.462851	-0.0665326	-0.0389834	0.387024	0.529383	0.426008	0.568367	0.142359	19.2739	3.70648	0.0313587	0.524095
MISP	0.579415	-0.236915	-0.0486483	0.1753	0.404115	-0.412215	-0.223948	-0.81633	-0.628063	0.188267	19.479	3.70537	0.0313881	0.524095
EPHA2	0.318271	-0.0028107	-0.0331015	0.268946	0.049325	-0.271757	-0.302048	-0.321082	-0.351373	-0.0302908	20.0332	3.70512	0.0313948	0.524095
NSUN2	-0.0833055	0.216245	0.0577452	-0.0685499	-0.0147556	0.284795	0.126295	0.29955	0.141051	-0.1585	21.2237	3.69091	0.0317727	0.52736
ATF7	1.20206	1.02707	0.989885	1.23132	-0.0292619	-0.204257	-0.241439	-0.174995	-0.212177	-0.0371819	16.1293	3.68543	0.0319198	0.52736
FN1	0.788836	0.132287	0.5762	0.736383	0.0524528	-0.604096	-0.160183	-0.656549	-0.212636	0.443913	20.6943	3.68288	0.0319905	0.52736
ARL2	0.0206391	0.352701	0.20745	0.164757	-0.144118	0.187943	0.0426931	0.332061	0.186811	-0.14525	20.0071	3.67261	0.032267	0.52736
CHCHD4	0.366768	-0.642189	-0.397147	-0.40255	0.769318	-0.239639	0.0054026	-1.00896	-0.763915	0.245041	17.8772	3.67135	0.0323014	0.52736
NDUFA2	0.303546	-0.116114	-0.122736	0.136972	0.166574	-0.253085	-0.259708	-0.419659	-0.426282	-0.00662212	20.8304	3.67103	0.03231	0.52736
PALM	0.268928	0.0698835	0.206409	0.504327	-0.235399	-0.434444	-0.297918	-0.199045	-0.0625194	0.136526	19.6552	3.66658	0.0324318	0.52736
MRC2	0.326209	0.0912048	0.748533	0.241167	0.085042	-0.149962	0.507366	-0.235004	0.422324	0.657328	21.058	3.66633	0.0324386	0.52736
BCS1L	-0.930343	-0.276011	-0.671445	-0.786083	-0.14426	0.510071	0.114637	0.654331	0.258897	-0.395434	18.4714	3.66039	0.0326018	0.52736
CD3EAP	-0.409107	-0.164461	-0.386923	-0.362821	-0.0462857	0.19836	-0.0241022	0.244646	0.0221835	-0.222462	20.0848	3.65652	0.0327087	0.52736
SIRT2	1.54341	1.31111	1.96643	0.978458	0.564952	0.33265	0.987972	-0.232302	0.423019	0.655321	16.5733	3.65628	0.0327153	0.52736
MRPL4	-0.373009	-0.0863384	-0.549372	-0.347917	-0.0250926	0.261578	-0.201455	0.286671	-0.176363	-0.463034	20.2849	3.6558	0.0327288	0.52736
NLN	-0.287594	0.0747015	-0.199239	-0.183494	-0.1041	0.258195	-0.0157449	0.362295	0.088355	-0.27394	20.5696	3.65026	0.0328825	0.528306
ECH1	0.211933	-0.276005	-0.432566	0.0403312	0.171602	-0.316336	-0.472898	-0.487938	-0.644499	-0.156561	21.1473	3.64682	0.0329785	0.528322
PIP5K1A	0.190118	0.952377	0.0979159	1.26968	-1.07956	-0.317301	-1.17176	0.762258	-0.0922025	-0.854461	16.593	3.63963	0.03318	0.530022
CKS2	-1.02906	-2.95609	-3.26459	-1.79854	0.769482	-1.15754	-1.46604	-1.92702	-2.23552	-0.3085	18.9093	3.70787	0.0334742	0.533048
NXN	-0.6648	-0.373075	0.589311	-0.468213	-0.196587	0.0951378	1.05752	0.291725	1.25411	0.962386	17.4549	3.62616	0.0335612	0.533048
TBC1D10B	0.288438	0.0969532	-0.166674	0.323347	-0.0349085	-0.226393	-0.49002	-0.191485	-0.455112	-0.263627	19.9348	3.61858	0.0337781	0.534965
RAB39B	-1.25192	-0.45021	-0.556257	-1.45161	0.199684	1.0014	0.895351	0.801714	0.695667	-0.106047	17.0281	3.59876	0.0343526	0.542498
FLNC	0.0169649	-0.223533	-0.230816	-0.147989	0.164954	-0.0755442	-0.0828272	-0.240498	-0.247781	-0.00728305	23.6309	3.59547	0.0344489	0.542498
DNPH1	-0.194571	0.890325	0.698244	-0.201769	0.00719839	1.09209	0.900013	1.0849	0.892815	-0.192081	20.6759	3.62014	0.0348662	0.547518
FUT11	0.0350213	-1.3057	-0.0533951	0.396727	-0.361706	-1.70243	-0.450122	-1.34072	-0.0884164	1.25231	16.441	3.56902	0.0352354	0.549201
MBTPS1	1.03351	0.923785	1.18932	1.16492	-0.131412	-0.241134	0.0243961	-0.109722	0.155808	0.26553	16.0937	3.5674	0.0352841	0.549201
KCT2	0.332656	0.0185676	0.219417	0.521446	-0.18879	-0.502878	-0.302029	-0.314088	-0.113239	0.200849	20.4702	3.56578	0.035333	0.549201
LAMP1	0.207016	0.294654	0.465464	-0.00252782	0.209544	0.297182	0.467992	0.0876385	0.258448	0.170809	24.5508	3.55725	0.035592	0.549201
NSUN4	-0.63724	0.674374	-1.14138	-0.322783	-0.314457	0.997156	-0.818598	1.31161	-0.504141	-1.81575	18.3024	3.55637	0.0356186	0.549201
KPNA1	-0.177219	0.0293426	0.458512	-0.228726	0.0515072	0.258069	0.687238	0.206562	0.635731	0.429169	20.1221	3.55634	0.0356196	0.549201
ATG3	-0.00238178	0.101524	0.655517	0.0404649	-0.0428467	0.0610595	0.615052	0.103906	0.657898	0.553992	21.4438	3.55485	0.035665	0.549201
NEDD4	-0.731878	-0.68019	-0.680085	-0.650727	-0.0811509	-0.0294626	-0.0293583	0.0516882	0.0517926	0.000104334	18.2996	3.54632	0.0359266	0.550997
ATP6V1F	0.331449	-0.150788	-0.0281477	1.03957	-0.708118	-1.19035	-1.06771	-0.482237	-0.359596	0.12264	20.6647	3.5701	0.0359798	0.550997
OXR1	-0.456052	-1.28528	-2.06202	-1.20492	0.748868	-0.0803627	-0.8571	-0.82923	-1.60597	-0.776737	17.4476	3.53742	0.0362018	0.551216
FAM3C	-0.176194	-1.05165	-1.55214	-0.131768	-0.0444258	-0.919882	-1.42038	-0.875456	-1.37595	-0.500493	17.6551	3.53658	0.0362279	0.551216
MRTFA	0.0451272	-0.428634	-0.621214	-0.166298	0.211425	-0.262336	-0.454916	-0.473761	-0.666341	-0.19258	19.1019	3.53453	0.0362916	0.551216
TEP1	0.603941	0.228907	0.419393	0.13328	0.470661	0.0956267	0.286113	-0.375034	-0.184549	0.190486	19.3872	3.53068	0.0364119	0.551536
CAVIN1	0.307533	-0.0569713	-0.193771	0.106586	0.200948	-0.163557	-0.300357	-0.364505	-0.501305	-0.1368	22.5183	3.52729	0.0365179	0.551638
RAB18	0.186012	0.0171694	0.466879	0.0751254	0.110887	-0.057956	0.391754	-0.168843	0.280867	0.44971	22.0702	3.51825	0.0368027	0.554435
FLYWCH2	0.1571	-0.61307	-0.557498	0.00773461	0.149366	-0.620805	-0.565232	-0.770171	-0.714598	0.0555729	19.6844	3.51471	0.0369149	0.554621
CRYBG3	0.845813	-0.0451313	0.179661	-0.0856016	0.931414	0.0404703	0.265262	-0.890944	-0.666152	0.224792	20.6842	3.52327	0.0370165	0.554648
DR1	-0.0509634	-0.306612	-0.398414	0.0587981	-0.109761	-0.36541	-0.457212	-0.255649	-0.347451	-0.0918017	21.0835	3.49543	0.0375327	0.55888
GPC4	-0.118497	-0.449885	1.87024	-0.866935	0.748438	0.417051	2.73718	-0.331388	1.98874	2.32013	18.8431	3.53975	0.0375812	0.55888
LATS1	0.718149	0.268375	1.2488	1.05841	-0.340261	-0.790034	0.190389	-0.449773	0.530649	0.980422	16.3876	3.49334	0.0376005	0.55888
PCDHGC3	1.68214	0.676417	1.89831	1.55583	0.126307	-0.879416	0.34248	-1.00572	0.216173	1.2219	17.5639	3.48129	0.0379934	0.562427
SEC23B	-0.282993	0.0856068	-0.0819584	-0.23964	-0.043353	0.325246	0.157681	0.368599	0.201034	-0.167565	20.5143	3.47961	0.0380487	0.562427
ANK3	-1.44626	-1.23202	-1.55806	-0.604147	-0.84211	-0.627873	-0.95391	0.214237	-0.111801	-0.326037	16.9613	3.47505	0.0381989	0.562427
TSPO	2.38173	-0.29952	-0.226811	-0.213312	2.59504	-0.0862078	-0.0134986	-2.68125	-2.60854	0.0727092	19.3927	3.54587	0.0382438	0.562427
MYL9	0.749212	-0.312903	0.225348	0.250006	0.499205	-0.562909	-0.0246582	-1.06211	-0.523863	0.538251	18.2464	3.46876	0.0384072	0.563277
RIOX2	-0.121336	0.15905	1.27523	-0.353801	0.232465	0.512851	1.62903	0.280386	1.39656	1.11618	18.1893	3.46583	0.0385043	0.563277
CFDP1	0.120705	-0.227895	-0.376585	0.349124	-0.228418	-0.577018	-0.725709	-0.3486	-0.497291	-0.148691	20.6595	3.44832	0.0390927	0.567765
COG1	-0.669853	0.181517	-0.813656	-0.406887	-0.262966	0.588404	-0.406769	0.85137	-0.143803	-0.995173	18.4179	3.44782	0.0391095	0.567765
IRF2BPL	0.650044	0.162286	0.595208	0.524144	0.1259	-0.361857	0.0710646	-0.487757	-0.0548355	0.432922	20.2262	3.44714	0.0391327	0.567765
IL18	-0.0527346	-0.136002	-0.128494	0.203959	-0.256694	-0.339961	-0.332453	-0.083267	-0.0757591	0.00750789	24.8808	3.44458	0.0392196	0.567765
PPP3CB	-0.789675	-1.05855	-1.11263	-0.775399	-0.014276	-0.28315	-0.337234	-0.268874	-0.322958	-0.0540836	18.3795	3.44074	0.0393504	0.568179
MRPL19	-0.267638	-0.192302	-0.325899	-0.239471	-0.0281674	0.0471683	-0.0864284	0.0753357	-0.058261	-0.133597	20.9793	3.42127	0.0400214	0.57637
EPB41L2	-0.132699	0.119002	0.0363654	0.0209942	-0.153693	0.0980081	0.0153712	0.251701	0.169064	-0.082637	21.8937	3.41332	0.0402992	0.577202
EPHX1	0.360364	-0.530997	-0.0246633	0.26375	0.0966138	-0.794747	-0.288414	-0.891361	-0.385027	0.506334	19.9285	3.40877	0.040459	0.577202
ATP5F1D	0.0276655	-0.144714	-0.203607	0.226703	-0.199038	-0.371417	-0.43031	-0.17238	-0.231273	-0.0588931	21.6495	3.40362	0.0406409	0.577202
CCT4	-0.120482	0.15134	0.0911659	-0.105032	-0.0154502	0.256372	0.196198	0.271822	0.211648	-0.0601737	23.8622	3.40298	0.0406635	0.577202
SARS1	-0.353577	-0.0900265	-0.102984	-0.381281	0.0277043	0.291255	0.278298	0.263551	0.250593	-0.0129572	22.88	3.399	0.0408049	0.577202
EDIL3	0.31847	0.17577	0.499744	0.216745	0.101725	-0.0409758	0.282999	-0.142701	0.181274	0.323975	22.1009	3.39659	0.0408907	0.577202
GPNMB	0.684487	-0.206198	0.215068	0.466279	0.218208	-0.672476	-0.251211	-0.890685	-0.469419	0.421266	21.1093	3.40732	0.0409008	0.577202
TEX264	0.526552	-0.031275	0.181384	0.0747918	0.45176	-0.106067	0.106593	-0.557827	-0.345168	0.212659	19.786	3.39606	0.0409098	0.577202
UBXN6	0.0720831	0.417891	0.440023	-0.250056	0.322139	0.667947	0.690079	0.345808	0.36794	0.0221323	19.0289	3.38369	0.0413536	0.580375
CTH	-1.88041	-1.46634	-2.01973	-2.13607	0.255664	0.669737	0.116344	0.414072	-0.13932	-0.553392	18.7326	3.39463	0.0414875	0.580375
SLC1A5	-0.516566	-0.226834	-0.43081	-0.578548	0.0619825	0.351714	0.147739	0.289731	0.0857561	-0.203975	22.4616	3.3799	0.0414906	0.580375
APLP2	-0.0304164	-0.573485	-0.0476967	0.100263	-0.130679	-0.673747	-0.147959	-0.543068	-0.0172802	0.525788	19.0827	3.3782	0.0415523	0.580375
B3GAT3	-0.467678	1.16004	-0.297173	-0.152159	-0.315519	1.3122	-0.145014	1.62772	0.170504	-1.45722	18.0563	3.37209	0.041775	0.582022
KIF3B	-0.168719	0.272613	0.376525	0.0476271	-0.216346	0.224986	0.328898	0.441332	0.545244	0.103912	19.5074	3.36557	0.0420138	0.5838
COL5A1	0.463595	0.109911	-0.0520584	0.7499	-0.286305	-0.639989	-0.801958	-0.353684	-0.515654	-0.161969	18.3245	3.36204	0.0421438	0.5838
VPS4A	-0.0528374	0.331143	0.384244	0.265705	-0.318542	0.0654387	0.118539	0.383981	0.437081	0.0531007	19.7169	3.36005	0.0422176	0.5838
COPS7A	-0.458624	-0.110071	-0.231652	-0.197774	-0.26085	0.0877026	-0.0338782	0.348553	0.226972	-0.121581	20.2163	3.35621	0.0423598	0.584313
KAT5	-1.47025	-1.12959	-2.1332	-1.83316	0.362917	0.703576	-0.300037	0.340659	-0.662954	-1.00361	17.2164	3.35046	0.0425738	0.585371
GINS1	-1.01569	-0.548059	-0.491312	-0.665804	-0.349886	0.117745	0.174492	0.467631	0.524378	0.056747	19.2326	3.34849	0.0426471	0.585371
SRP9	0.379812	-0.0153091	-0.0281065	0.179618	0.200194	-0.194927	-0.207725	-0.395121	-0.407919	-0.0127974	23.4141	3.34308	0.0428502	0.586711
PCYT1A	0.371527	-1.51142	0.367438	-1.31029	1.68182	-0.201133	1.67773	-1.88295	-0.00408913	1.87886	17.2046	3.33311	0.0432267	0.59041
ENAH	-0.277193	-0.283485	-0.332089	-0.142857	-0.134336	-0.140628	-0.189232	-0.0062921	-0.0548961	-0.048604	21.5257	3.32264	0.0436264	0.590573
STUB1	0.146768	-0.154926	-0.0842357	0.177712	-0.0309438	-0.332638	-0.261948	-0.301694	-0.231004	0.0706899	21.1792	3.31979	0.0437358	0.590573
TCP1	-0.118508	0.0959155	-0.0372133	-0.0322961	-0.086212	0.128212	-0.00491717	0.214424	0.0812949	-0.133129	23.9254	3.31955	0.0437453	0.590573
DBN1	-0.0418447	-0.0628064	-0.232347	0.114776	-0.156621	-0.177582	-0.347122	-0.0209617	-0.190502	-0.16954	22.9127	3.31887	0.0437715	0.590573
URB2	0.649161	0.254772	1.72326	0.793065	-0.143904	-0.538293	0.930191	-0.394388	1.0741	1.46848	16.8218	3.31867	0.043779	0.590573
GSPT2	-0.586995	-0.543194	-0.682284	-0.612219	0.0252236	0.0690249	-0.0700652	0.0438012	-0.0952888	-0.13909	19.9001	3.31616	0.043876	0.590573
COPS4	-0.207044	-0.163795	-0.340269	-0.180286	-0.0267578	0.0164913	-0.159983	0.0432491	-0.133225	-0.176474	21.2232	3.29128	0.0448487	0.601368
NEFL	0.39103	0.0598127	-0.0708024	0.448034	-0.0570033	-0.388221	-0.518836	-0.331218	-0.461833	-0.130615	19.8474	3.29013	0.0448944	0.601368
MRE11	-0.265133	-0.0250215	0.0361465	-0.19559	-0.0695432	0.170568	0.231737	0.240112	0.30128	0.0611681	20.3782	3.2821	0.0452136	0.60308
HDGFL2	0.13304	-0.0429727	0.00259355	0.294569	-0.161529	-0.337541	-0.291975	-0.176012	-0.130446	0.0455662	22.7679	3.28092	0.0452608	0.60308
PDCD2	-0.221943	0.298067	-0.129496	-0.21378	-0.00816303	0.511848	0.0842837	0.520011	0.0924467	-0.427564	19.1794	3.27479	0.0455068	0.60308
MTMR2	-1.75602	-1.57479	-1.7853	-0.807881	-0.94814	-0.766907	-0.97742	0.181233	-0.0292798	-0.210513	17.5998	3.27331	0.0455665	0.60308
TENM2	-0.753883	-0.223102	-0.0979421	-0.908253	0.154371	0.685151	0.810311	0.530781	0.655941	0.12516	18.3238	3.26738	0.0458061	0.60308
ANKS1A	0.110013	0.0553246	1.12712	0.164652	-0.0546392	-0.109327	0.96247	-0.054688	1.01711	1.0718	17.6401	3.26708	0.0458184	0.60308
ASXL1	0.799935	-0.250019	-0.163791	-0.133862	0.933797	-0.116157	-0.0299292	-1.04995	-0.963726	0.0862277	18.129	3.2629	0.0459884	0.60308
COX16	0.761681	-0.533024	-0.13565	-0.537017	1.2987	0.00399365	0.401367	-1.2947	-0.897331	0.397374	18.3005	3.26127	0.0460547	0.60308
UBA5	-0.148892	0.0409253	0.354802	-0.225106	0.0762135	0.266031	0.579908	0.189818	0.503694	0.313876	21.1808	3.26108	0.0460626	0.60308
PPM1B	-0.130505	0.0064295	0.148155	-0.159613	0.0291081	0.166043	0.307768	0.136934	0.27866	0.141726	20.827	3.25999	0.0461071	0.60308
MBD2	-0.123535	-0.362722	-0.599759	-0.371947	0.248411	0.00922423	-0.227812	-0.239187	-0.476223	-0.237036	19.0926	3.25681	0.0462369	0.603359
PDXP	-0.401882	0.073426	-0.1088	-0.421223	0.0193403	0.494649	0.312422	0.475308	0.293082	-0.182227	20.7972	3.25078	0.0464848	0.603998
ARPP19	1.57506	-0.326942	-0.555839	0.973321	0.601743	-1.30026	-1.52916	-1.90201	-2.1309	-0.228897	18.9382	3.27938	0.0466415	0.603998
SDC4	-0.0238031	-0.552624	-1.02262	-0.211669	0.187866	-0.340955	-0.810956	-0.528821	-0.998821	-0.470001	18.317	3.24265	0.0468212	0.603998
RPL26	0.000242934	-0.426908	-0.506618	-1.53401	1.53426	1.10711	1.0274	-0.427151	-0.506861	-0.0797098	16.3966	3.23975	0.046942	0.603998
MAPKAPK2	0.316448	-0.582851	0.337658	0.357209	-0.0407607	-0.94006	-0.0195514	-0.899299	0.0212093	0.920509	16.0187	3.23902	0.0469726	0.603998
VPS4B	-0.14065	0.12698	0.486184	0.0616097	-0.20226	0.0653705	0.424574	0.267631	0.626835	0.359204	19.8529	3.23458	0.047158	0.603998
PPIB	0.154534	-0.0442606	0.0799846	0.0885854	0.0659488	-0.132846	-0.00860079	-0.198795	-0.0745496	0.124245	25.4977	3.2324	0.0472498	0.603998
RRP9	0.187623	0.122773	0.0889634	-0.126895	0.314518	0.249667	0.215858	-0.0648503	-0.0986598	-0.0338095	21.6308	3.22919	0.0473847	0.603998
MAGEB2	0.0144684	-0.235892	-0.210544	-0.281446	0.295914	0.0455539	0.070902	-0.25036	-0.225012	0.0253481	21.716	3.22867	0.0474067	0.603998
NECTIN2	0.0540881	-0.192738	-0.377337	-0.194919	0.249007	0.0021802	-0.182419	-0.246826	-0.431425	-0.184599	21.2909	3.22682	0.0474845	0.603998
ITM2B	0.807782	-0.4831	0.171398	0.627412	0.18037	-1.11051	-0.456015	-1.29088	-0.636385	0.654497	20.5977	3.2612	0.0475092	0.603998
NOM1	0.628106	-0.379281	-0.29883	0.0973161	0.53079	-0.476598	-0.396146	-1.00739	-0.926937	0.0804513	18.5278	3.22313	0.0476406	0.603998
PRPF4	-0.100585	-0.0665074	-0.624101	-0.346176	0.245591	0.279669	-0.277925	0.034078	-0.523516	-0.557594	18.752	3.22076	0.0477412	0.603998
CDC45	-0.70747	-0.00520296	-0.709411	-0.52714	-0.18033	0.521937	-0.182272	0.702267	-0.0019418	-0.704208	18.7413	3.21922	0.047807	0.603998
NCOA4	1.37255	0.561023	1.46353	1.36163	0.0109163	-0.800611	0.1019	-0.811528	0.0909835	0.902511	17.3979	3.20967	0.0482152	0.607773
CHST14	-2.09773	-1.49321	-1.31555	-0.838366	-1.25936	-0.654845	-0.47718	0.60452	0.782184	0.177665	17.0521	3.20385	0.0484658	0.609551
WFS1	0.330675	-0.0201768	0.0417553	0.21451	0.116166	-0.234686	-0.172754	-0.350852	-0.28892	0.0619321	20.8329	3.19546	0.0488303	0.612749
TOMM22	-0.0452443	-0.252426	-0.27423	0.0287622	-0.0740066	-0.281188	-0.302993	-0.207182	-0.228986	-0.0218045	21.1211	3.18946	0.0490926	0.613386
S100A2	0.72338	-0.0655258	0.23533	0.559822	0.163558	-0.625348	-0.324492	-0.788906	-0.48805	0.300856	24.6766	3.22442	0.0492348	0.613386
CHD1L	-0.190685	0.106531	0.176393	-0.0839608	-0.106725	0.190492	0.260354	0.297217	0.367079	0.0698622	20.0246	3.18357	0.0493516	0.613386
NCLN	-0.0133009	0.107011	0.331959	-0.142947	0.129646	0.249958	0.474906	0.120312	0.34526	0.224948	20.6366	3.18292	0.0493803	0.613386
FIBCD1	0.72519	-0.546732	-0.452419	1.59076	-0.865567	-2.13749	-2.04318	-1.27192	-1.17761	0.094313	17.0746	3.18069	0.0494786	0.613386
FAM111B	-1.02628	-0.560535	-1.1883	-0.985124	-0.0411595	0.424589	-0.203177	0.465749	-0.162017	-0.627766	18.3151	3.17762	0.0496146	0.613386
TMEM26	1.34754	3.29774	2.28094	0.895461	0.452074	2.40228	1.38547	1.95021	0.9334	-1.01681	18.1928	3.20221	0.0496535	0.613386
FNBP4	0.235103	0.240379	0.414831	0.150514	0.0845887	0.0898657	0.264317	0.00527699	0.179729	0.174452	19.7862	3.16972	0.049967	0.615891
ENO1	0.0487112	0.178919	0.165732	-0.00223917	0.0509503	0.181158	0.167971	0.130207	0.117021	-0.0131867	26.3875	3.15873	0.0504612	0.617719
TBC1D2	1.60002	0.110328	0.402877	1.42512	0.174896	-1.31479	-1.02224	-1.48969	-1.19714	0.292549	17.3723	3.15617	0.0505773	0.617719
CAT	0.100799	0.201692	0.139498	0.35057	-0.249771	-0.148878	-0.211072	0.100893	0.038699	-0.0621943	21.162	3.15344	0.0507012	0.617719
RNF130	-0.143197	-0.258108	1.10801	0.595709	-0.738907	-0.853818	0.512298	-0.114911	1.2512	1.36612	16.0012	3.15263	0.0507378	0.617719
ATRN	0.640381	-0.151985	0.847405	0.866956	-0.226575	-1.01894	-0.0195514	-0.792366	0.207024	0.999389	16.1736	3.15203	0.0507652	0.617719
RRM2	-0.225269	-0.138176	-0.523528	0.0500922	-0.275361	-0.188268	-0.573621	0.0870934	-0.298259	-0.385353	21.3234	3.15118	0.0508042	0.617719
SDF4	-0.232858	-0.771727	-1.26703	0.160855	-0.393713	-0.932582	-1.42789	-0.538869	-1.03418	-0.495306	18.2967	3.14923	0.0508932	0.617719
OPA1	0.0867647	-0.143028	-0.00231468	-0.183445	0.27021	0.0404165	0.18113	-0.229793	-0.0890794	0.140714	20.7791	3.1405	0.0512935	0.621222
CD276	0.33036	-0.125617	0.0226343	0.311106	0.0192537	-0.436723	-0.288472	-0.455977	-0.307725	0.148251	19.9572	3.13698	0.051456	0.621265
AMBRA1	0.679475	1.67878	-0.583279	-0.197969	0.877444	1.87675	-0.38531	0.999303	-1.26275	-2.26206	16.1794	3.13233	0.0516716	0.621265
SMG8	-0.226503	0.0586827	-0.220404	-0.29354	0.0670372	0.352222	0.0731362	0.285185	0.00609903	-0.279086	19.8622	3.12916	0.051819	0.621265
OPLAH	-0.593838	-0.518164	-0.786087	-0.408483	-0.185355	-0.109681	-0.377603	0.0756743	-0.192248	-0.267923	18.7304	3.12833	0.0518576	0.621265
MAN1A1	2.03386	-0.316974	0.00262257	-0.934034	2.96789	0.61706	0.936656	-2.35083	-2.03124	0.319596	17.6647	3.12653	0.0519446	0.621265
GINM1	0.888004	0.0636577	1.33514	0.489205	0.398799	-0.425548	0.845936	-0.824347	0.447138	1.27148	17.877	3.12529	0.0519998	0.621265
PPA2	-0.33114	0.151284	-0.0199846	-0.187545	-0.143595	0.338829	0.167561	0.482424	0.311155	-0.171269	19.3312	3.12359	0.0520794	0.621265
PGK1	0.174655	0.11703	0.264398	0.0699286	0.104726	0.047101	0.194469	-0.057625	0.0897429	0.147368	24.8248	3.11724	0.0523781	0.621975
KIFBP	-0.101789	-0.0123951	0.716086	0.175115	-0.276904	-0.18751	0.540971	0.0893942	0.817875	0.728481	20.621	3.11463	0.0525013	0.621975
WDR26	-0.63092	-0.528752	-0.317614	-0.811645	0.180725	0.282893	0.494031	0.102168	0.313306	0.211138	18.2908	3.11425	0.0525194	0.621975
SLAIN2	0.0390914	-0.241987	-0.301604	0.0467948	-0.00770337	-0.288782	-0.348399	-0.281078	-0.340695	-0.0596171	22.4867	3.11175	0.0526381	0.621975
GYG1	-0.0409427	0.129268	0.30867	-0.205655	0.164712	0.334923	0.514325	0.17021	0.349613	0.179402	19.7605	3.11048	0.0526984	0.621975
RAB2B	0.356916	0.19937	1.65174	0.506644	-0.149728	-0.307274	1.1451	-0.157546	1.29482	1.45237	17.4077	3.10674	0.0528761	0.622573
VAT1	0.262068	0.0408509	0.238329	0.190068	0.0720002	-0.149217	0.0482615	-0.221217	-0.0237386	0.197478	23.2038	3.10049	0.0531751	0.622573
GTF2I	0.321921	0.153314	0.47096	0.273275	0.0486462	-0.119961	0.197685	-0.168607	0.149039	0.317646	21.3336	3.0981	0.05329	0.622573
ARPC3	0.112298	-0.108507	0.0479328	0.286153	-0.173855	-0.394661	-0.238221	-0.220805	-0.0643652	0.15644	22.2757	3.09691	0.0533475	0.622573
NUBPL	0.508913	2.59355	2.61094	0.267339	0.241574	2.32621	2.3436	2.08463	2.10203	0.0173979	17.1815	3.10357	0.0534678	0.622573
OGDH	-0.0821655	0.0491619	0.0970384	0.266985	-0.349151	-0.217823	-0.169947	0.131327	0.179204	0.0478765	20.612	3.08956	0.053703	0.622573
NAGA	-0.277307	-0.0442815	-0.424065	-0.232666	-0.0446409	0.188384	-0.191399	0.233025	-0.146758	-0.379783	20.201	3.08523	0.0539134	0.622573
GMFB	-0.136451	-0.339047	-0.377435	-0.027012	-0.109439	-0.312035	-0.350423	-0.202596	-0.240984	-0.0383887	21.5155	3.08425	0.0539614	0.622573
TBC1D4	0.456063	0.237647	0.499296	0.368255	0.0878079	-0.130608	0.131042	-0.218416	0.0432337	0.261649	19.3573	3.08113	0.0541138	0.622573
KIRREL1	0.325808	0.218111	0.325688	0.392413	-0.0666049	-0.174301	-0.0667243	-0.107697	-0.000119451	0.107577	20.1575	3.08068	0.0541359	0.622573
YME1L1	-0.326009	-0.0260446	-0.325803	-0.0342517	-0.291757	0.0082071	-0.291552	0.299964	0.000205298	-0.299759	20.1623	3.07855	0.0542401	0.622573
TRIML2	2.23154	1.30898	2.25275	1.71197	0.519572	-0.402987	0.540781	-0.922559	0.0212093	0.943768	16.5184	3.0765	0.0543407	0.622573
DNAJC8	0.270416	0.0986538	0.226618	0.328232	-0.0578159	-0.229579	-0.101615	-0.171763	-0.0437987	0.127964	21.8274	3.07579	0.0543757	0.622573
MYCBP	-0.0481613	0.0586403	-0.283226	0.0322271	-0.0803884	0.0264132	-0.315453	0.106802	-0.235065	-0.341866	21.7851	3.07388	0.0544701	0.622573
KIF3A	-0.12291	0.316685	0.109764	-0.05819	-0.0647199	0.374875	0.167954	0.439595	0.232674	-0.206921	19.3548	3.07189	0.0545679	0.622573
CCPG1	0.671816	-0.473081	1.57439	-0.418842	1.09066	-0.0542396	1.99323	-1.1449	0.902573	2.04747	17.6929	3.06698	0.0548114	0.622573
TENM3	0.189458	-0.278011	0.0390344	0.169871	0.0195866	-0.447883	-0.130837	-0.467469	-0.150423	0.317046	19.4045	3.06339	0.05499	0.622573
FAM122A	-0.0548482	1.03212	-0.631203	1.1531	-1.20795	-0.120986	-1.78431	1.08697	-0.576355	-1.66332	15.1247	3.06279	0.05502	0.622573
NAB1	-0.383594	1.28025	0.342389	0.488051	-0.871646	0.792202	-0.145662	1.66385	0.725983	-0.937864	16.1186	3.05739	0.05529	0.622573
SFXN1	-0.201394	0.00929465	0.0560167	-0.112005	-0.0893884	0.1213	0.168022	0.210688	0.257411	0.0467221	22.3616	3.05659	0.0553305	0.622573
COX5B	0.291726	-0.078846	-0.200453	0.39601	-0.104284	-0.474856	-0.596463	-0.370572	-0.492179	-0.121607	22.6703	3.05278	0.0555243	0.622573
NRM	0.504947	0.239139	1.6687	-0.131559	0.636506	0.370698	1.80026	-0.265808	1.16376	1.42957	18.8854	3.06093	0.0555603	0.622573
STRN4	-0.444868	-0.729232	-0.673913	-0.246296	-0.198572	-0.482936	-0.427617	-0.284364	-0.229045	0.0553188	18.6429	3.04326	0.0560042	0.622573
SELENOO	0.0460685	-0.282694	0.901118	-0.225771	0.27184	-0.0569225	1.12689	-0.328762	0.85505	1.18381	17.9379	3.04301	0.0560169	0.622573
COQ9	-0.0440495	0.334154	-0.357816	0.132405	-0.176455	0.201749	-0.490221	0.378203	-0.313767	-0.69197	19.2326	3.0425	0.0560427	0.622573
MED20	-1.95196	-2.01622	-2.30386	-1.89315	-0.0588149	-0.123068	-0.41071	-0.0642531	-0.351895	-0.287642	18.0361	3.0377	0.0562877	0.622573
TGM2	0.540664	0.421362	0.863995	0.209638	0.331026	0.211723	0.654357	-0.119303	0.323331	0.442634	22.6052	3.05099	0.0563157	0.622573
PPP5C	-0.272332	0.011299	0.0776495	-0.127467	-0.144865	0.138766	0.205116	0.283631	0.349982	0.0663505	21.0331	3.03245	0.0565569	0.622573
MGST2	0.193861	-0.173026	-0.126173	0.365165	-0.171304	-0.538191	-0.491338	-0.366886	-0.320034	0.0468527	20.4212	3.03038	0.0566639	0.622573
TNFRSF10B	1.19135	-1.02708	0.170235	0.406194	0.785153	-1.43327	-0.235959	-2.21842	-1.02111	1.19731	17.0991	3.02347	0.0570216	0.622573
DOK1	0.146321	0.0825695	0.311948	0.689855	-0.543534	-0.607285	-0.377906	-0.0637514	0.165628	0.229379	18.6597	3.0182	0.0572956	0.622573
EIF2B3	-0.101731	-0.144798	-0.364131	-0.303915	0.202184	0.159117	-0.0602163	-0.0430669	-0.2624	-0.219333	20.4504	3.01569	0.057427	0.622573
METTL2B	-0.193828	0.154585	0.384698	0.47007	-0.663898	-0.315485	-0.0853722	0.348413	0.578526	0.230113	19.5484	3.01551	0.0574362	0.622573
BET1	-0.441952	-0.796094	-0.657738	-1.55485	1.1129	0.758755	0.897112	-0.354142	-0.215786	0.138356	15.9939	3.00867	0.0577957	0.622573
PISD	1.49777	0.317623	1.51898	0.393978	1.10379	-0.0763547	1.125	-1.18015	0.0212093	1.20136	16.54	3.00819	0.0578209	0.622573
LDHB	-0.0230625	0.137084	0.109817	0.040119	-0.0631815	0.0969645	0.0696985	0.160146	0.13288	-0.027266	25.9024	3.006	0.0579366	0.622573
MOCS3	-0.205151	0.721342	0.70713	0.0925934	-0.297744	0.628748	0.614536	0.926493	0.912281	-0.0142123	18.3202	3.00593	0.0579403	0.622573
VASN	0.0703688	-0.307009	-0.0577753	-1.276	1.34637	0.968992	1.21823	-0.377378	-0.128144	0.249234	17.4562	3.00521	0.0579786	0.622573
TRAP1	-0.228367	-0.0467911	-0.22468	-0.291122	0.0627552	0.244331	0.0664419	0.181576	0.00368673	-0.177889	22.6187	3.00517	0.0579809	0.622573
GSDME	-0.396664	0.066256	0.206951	-0.225413	-0.171251	0.29167	0.432365	0.46292	0.603615	0.140695	19.3968	3.00401	0.0580421	0.622573
AFG3L2	-0.279083	-0.168131	-0.275767	-0.346507	0.0674242	0.178376	0.0707399	0.110952	0.00331571	-0.107636	22.0672	3.00071	0.0582172	0.622573
RABL6	-1.33491	-1.56695	-0.787853	-1.50847	0.173559	-0.058481	0.720615	-0.23204	0.547056	0.779096	18.0704	3.0001	0.05825	0.622573
IPO7	-0.210417	-0.0600855	-0.144748	-0.280153	0.0697357	0.220067	0.135405	0.150331	0.0656691	-0.0846623	22.6056	2.99843	0.0583385	0.622573
ATP13A3	-1.0079	-1.13967	-1.64255	0.283963	-1.29186	-1.42363	-1.92651	-0.131775	-0.634649	-0.502874	17.1516	2.99806	0.0583581	0.622573
RDH13	1.70675	0.443447	1.71165	1.21062	0.496129	-0.767175	0.501025	-1.2633	0.0048957	1.2682	17.0481	2.99776	0.0583744	0.622573
VAC14	0.0633535	0.203839	0.309659	-0.00997353	0.0733271	0.213813	0.319633	0.140486	0.246306	0.10582	20.4462	2.99682	0.0584247	0.622573
ARL8B	0.33994	0.224212	0.313732	0.243527	0.0964137	-0.019315	0.0702058	-0.115729	-0.026208	0.0895208	21.9585	2.99593	0.0584718	0.622573
MCRIP1	0.362464	-0.0610539	-0.121021	0.520577	-0.158113	-0.581631	-0.641598	-0.423518	-0.483485	-0.0599666	20.6765	2.99416	0.0585666	0.622573
ZBTB20	0.701255	0.760455	1.70246	0.0320204	0.669234	0.728434	1.67044	0.0591997	1.0012	0.942005	16.5556	2.99363	0.0585951	0.622573
CTCF	0.629047	0.329509	2.4886	1.2377	-0.608652	-0.90819	1.2509	-0.299538	1.85955	2.15909	19.1956	3.04268	0.0586356	0.622573
LAMC1	0.296333	-0.0429766	0.206813	0.330476	-0.0341429	-0.373452	-0.123663	-0.339309	-0.08952	0.249789	20.0237	2.99072	0.058751	0.622573
DOHH	0.185056	-0.231325	0.0115912	0.181609	0.00344683	-0.412934	-0.170018	-0.41638	-0.173465	0.242916	19.6678	2.98961	0.0588106	0.622573
CEBPB	0.42326	0.375442	0.872663	-0.096452	0.519712	0.471894	0.969115	-0.047818	0.449403	0.497221	19.3736	2.98733	0.0589333	0.622573
SARS2	-0.0304802	-0.239756	-0.274312	-0.0384605	0.00798029	-0.201296	-0.235852	-0.209276	-0.243832	-0.0345559	20.1401	2.9849	0.0590649	0.622573
GGT7	-0.0134775	-0.0414311	0.155443	0.578294	-0.591771	-0.619725	-0.422851	-0.0279536	0.168921	0.196874	18.6408	2.98475	0.0590729	0.622573
MEF2D	0.520627	0.171604	0.317747	0.252886	0.267741	-0.081282	0.0648616	-0.349023	-0.202879	0.146144	19.3514	2.98354	0.0591385	0.622573
LIN7A	-0.405803	0.119033	-1.29009	0.155983	-0.561786	-0.0369493	-1.44607	0.524836	-0.884287	-1.40912	16.1873	2.98249	0.0591953	0.622573
PLS3	0.0314636	-0.192931	-0.20853	-0.126951	0.158415	-0.0659794	-0.0815787	-0.224394	-0.239994	-0.0155994	20.9661	2.98078	0.059288	0.622573
PIP4P1	-0.470902	-0.672984	0.771791	-0.271026	-0.199876	-0.401958	1.04282	-0.202082	1.24269	1.44478	17.7798	2.97951	0.0593567	0.622573
RPA3	-0.10032	-0.00833883	-0.0818337	0.368548	-0.468868	-0.376887	-0.450382	0.0919811	0.0184863	-0.0734949	20.6387	2.97664	0.0595131	0.622592
RNF149	0.28306	-0.0200736	0.638753	0.340138	-0.0570778	-0.360211	0.298615	-0.303133	0.355693	0.658827	19.9315	2.97537	0.0595825	0.622592
STAU1	-0.00735969	-0.025402	-0.196161	0.116105	-0.123464	-0.141507	-0.312265	-0.0180423	-0.188801	-0.170759	21.1526	2.97043	0.0598523	0.624011
OGFOD3	0.810431	0.159799	-0.835933	-0.347393	1.15782	0.507192	-0.48854	-0.650632	-1.64636	-0.995732	17.3421	2.96533	0.0601329	0.624011
RCOR1	0.0116404	-0.201752	0.18565	0.0341495	-0.0225091	-0.235901	0.1515	-0.213392	0.174009	0.387401	19.7923	2.96488	0.0601579	0.624011
DCK	-0.138231	0.470087	0.149247	-0.202674	0.0644427	0.672761	0.351921	0.608318	0.287478	-0.32084	18.6485	2.96415	0.060198	0.624011
HACL1	-0.675232	0.118924	0.136431	0.155983	-0.831214	-0.0370583	-0.0195514	0.794156	0.811663	0.0175069	15.9559	2.96196	0.0603194	0.624011
UTP11	-0.74207	-0.662549	-0.630963	-0.877972	0.135902	0.215423	0.247009	0.0795213	0.111108	0.0315864	19.6262	2.96065	0.0603918	0.624011
TSSC4	1.18874	0.145818	-0.155069	0.106669	1.08207	0.0391482	-0.261738	-1.04292	-1.34381	-0.300887	18.7225	2.95781	0.060549	0.624475
C9orf40	-0.763471	0.192386	0.458517	-0.218065	-0.545407	0.410451	0.676582	0.955858	1.22199	0.266131	17.7042	2.94265	0.0613982	0.631208
SCP2	0.372205	-0.114902	-0.0203308	0.262324	0.109881	-0.377227	-0.282655	-0.487107	-0.392536	0.0945714	21.4216	2.93982	0.0615586	0.631208
ATAT1	-0.676594	0.119033	-1.94562	-1.36368	0.687084	1.48271	-0.581939	0.795627	-1.26902	-2.06465	16.6765	2.93559	0.0617983	0.631208
NOG	0.00380587	0.0660618	-0.950578	-1.64196	1.64577	1.70802	0.691384	0.062256	-0.954384	-1.01664	16.8596	2.93516	0.0618229	0.631208
ITGB1	0.114151	0.0802246	0.161894	-0.0804669	0.194618	0.160692	0.242361	-0.0339262	0.0477428	0.081669	24.1405	2.93292	0.0619503	0.631208
PTMA	-0.938275	-0.0831157	-0.798178	-1.80715	0.868879	1.72404	1.00898	0.855159	0.140097	-0.715063	16.6285	2.93009	0.0621121	0.631208
GBP1	-0.478936	0.119033	-1.30697	-1.4405	0.961566	1.55954	0.133531	0.597969	-0.828035	-1.426	16.5246	2.92814	0.0622234	0.631208
FKBP8	0.281986	0.224918	0.468555	0.100804	0.181182	0.124113	0.367751	-0.0570688	0.186569	0.243638	20.1196	2.92644	0.0623214	0.631208
PTRHD1	0.306066	-0.483048	-0.139246	0.264616	0.0414498	-0.747664	-0.403862	-0.789114	-0.445312	0.343802	20.3616	2.92617	0.0623369	0.631208
SLC35F6	-0.711898	-0.713784	-1.20357	-2.45102	1.73912	1.73724	1.24745	-0.00188564	-0.491672	-0.489786	16.9192	2.92453	0.0624307	0.631208
DDX28	-0.260222	-0.465292	-0.416325	0.266808	-0.52703	-0.7321	-0.683133	-0.20507	-0.156102	0.0489673	18.7043	2.92204	0.0625742	0.631208
STX4	0.161606	0.28384	0.162093	0.526417	-0.364811	-0.242577	-0.364324	0.122234	0.000487316	-0.121746	20.636	2.92066	0.0626542	0.631208
ELMO2	-0.00604259	-0.0211059	0.33362	0.015992	-0.0220346	-0.0370979	0.317628	-0.0150633	0.339663	0.354726	19.5813	2.90778	0.063403	0.631208
NAV3	1.0714	-0.16067	0.376201	0.931999	0.139402	-1.09267	-0.555798	-1.23207	-0.6952	0.536871	17.4485	2.9073	0.0634307	0.631208
PRDX4	-0.1965	0.0169403	0.576535	-0.307166	0.110666	0.324106	0.883701	0.213441	0.773035	0.559595	21.0707	2.91507	0.0634492	0.631208
CRELD1	0.67674	0.242931	1.01789	0.577975	0.098764	-0.335044	0.439911	-0.433808	0.341147	0.774955	18.3531	2.90537	0.0635438	0.631208
LAT2	0.944462	-0.0286423	-0.173477	0.09717	0.847292	-0.125812	-0.270647	-0.973104	-1.11794	-0.144835	19.0777	2.90223	0.0637287	0.631208
ECM1	0.368195	-0.130186	0.2043	0.490126	-0.121931	-0.620311	-0.285825	-0.498381	-0.163895	0.334486	19.2899	2.89923	0.0639054	0.631208
NUBP2	0.323082	0.614314	0.815682	0.535557	-0.212474	0.0787575	0.280125	0.291232	0.492599	0.201368	20.6346	2.89721	0.0640251	0.631208
TARS1	-0.0730993	-0.045172	-0.0484587	-0.28686	0.213761	0.241688	0.238402	0.0279273	0.0246406	-0.00328673	23.6786	2.89167	0.0643537	0.631208
PIK3R2	-1.874	-1.92661	-1.35384	-1.14667	-0.727333	-0.779939	-0.207174	-0.0526065	0.520159	0.572765	17.1335	2.89059	0.0644182	0.631208
ACSL1	0.198072	0.938687	0.414903	0.24619	-0.0481186	0.692497	0.168712	0.740615	0.216831	-0.523784	18.8424	2.88916	0.0645032	0.631208
NRBF2	1.08914	-0.406184	-0.378644	0.0145224	1.07462	-0.420706	-0.393166	-1.49532	-1.46778	0.0275398	18.395	2.88864	0.0645342	0.631208
DIAPH2	-0.385396	0.13959	1.17836	-0.625605	0.240209	0.765195	1.80396	0.524986	1.56375	1.03877	18.1163	2.88271	0.0648898	0.631208
SOWAHC	0.333975	0.363841	0.344735	0.638794	-0.304819	-0.274953	-0.294059	0.0298657	0.01076	-0.0191058	19.2634	2.88262	0.064895	0.631208
TST	0.0765469	0.281378	0.320613	0.278126	-0.201579	0.0032517	0.0424862	0.204831	0.244066	0.0392345	21.1203	2.88202	0.064931	0.631208
MICA	2.92333	-0.273117	1.35633	0.085479	2.83785	-0.358596	1.27086	-3.19645	-1.56699	1.62945	19.1315	2.94571	0.0650761	0.631208
HAGH	-0.112438	0.0911378	-0.0535738	0.241462	-0.3539	-0.150324	-0.295036	0.203576	0.0588642	-0.144712	21.1454	2.87791	0.0651784	0.631208
SLC52A2	1.40506	1.81034	1.52232	-0.584474	1.98953	2.39481	2.1068	0.405282	0.117266	-0.288015	17.3808	2.8779	0.0651795	0.631208
KRT18	0.1828	0.0597032	-0.0287355	0.144435	0.0383649	-0.0847317	-0.17317	-0.123097	-0.211535	-0.0884388	24.9215	2.87596	0.0652967	0.631208
TMEM41B	0.895714	0.941922	-1.77867	-1.80061	2.69633	2.74253	0.0219415	0.0462078	-2.67439	-2.72059	18.3077	2.91183	0.0653409	0.631208
KRR1	-0.0826792	0.0569165	-0.280043	-0.492479	0.4098	0.549396	0.212436	0.139596	-0.197364	-0.33696	20.1795	2.8741	0.0654092	0.631208
EIF3I	-0.0107995	0.155937	0.0940176	-0.0667831	0.0559837	0.22272	0.160801	0.166736	0.104817	-0.0619192	22.535	2.87238	0.0655138	0.631208
ALDH1L1	-1.37759	-0.45391	-0.884515	-1.29427	-0.0833195	0.840356	0.409751	0.923675	0.49307	-0.430605	16.671	2.8723	0.0655184	0.631208
COL6A2	-0.361761	-0.896774	-0.556846	-0.346668	-0.0150936	-0.550106	-0.210179	-0.535012	-0.195085	0.339927	18.7566	2.87086	0.0656057	0.631208
PRPF40A	0.0340873	-0.0791115	-0.237506	-0.120197	0.154284	0.0410851	-0.11731	-0.113199	-0.271593	-0.158395	20.9828	2.86958	0.0656839	0.631208
PSMD7	0.214324	0.322983	0.351849	0.113671	0.100653	0.209312	0.238178	0.108659	0.137525	0.0288657	22.635	2.86937	0.0656967	0.631208
NOSIP	-0.296411	-0.00483911	-0.458749	-0.09653	-0.199881	0.0916909	-0.362219	0.291572	-0.162337	-0.45391	20.2374	2.86919	0.0657076	0.631208
CLEC11A	0.101466	0.0429256	0.598207	0.0999383	0.00152757	-0.0570127	0.498268	-0.0585403	0.496741	0.555281	18.9944	2.86739	0.0658175	0.631208
MRPL9	-0.0924588	0.0463487	-0.208316	-0.0653966	-0.0270622	0.111745	-0.14292	0.138807	-0.115858	-0.254665	20.3099	2.86572	0.0659196	0.631208
POLR1C	-0.299449	-0.226251	-0.0632578	-0.295257	-0.00419118	0.0690064	0.232	0.0731976	0.236191	0.162993	21.0052	2.86294	0.0660896	0.631208
CYP51A1	0.25316	0.0481925	0.094918	0.438412	-0.185252	-0.390219	-0.343494	-0.204967	-0.158242	0.0467255	20.7062	2.8621	0.0661413	0.631208
BMPR1A	0.980429	0.122465	0.684425	1.33015	-0.349725	-1.20769	-0.64573	-0.857964	-0.296004	0.56196	17.6979	2.86132	0.066189	0.631208
EDF1	0.772295	-0.213863	-0.444884	0.291994	0.480301	-0.505857	-0.736878	-0.986157	-1.21718	-0.231022	21.9659	2.89718	0.0667615	0.631208
PTER	-1.26107	0.400921	-0.493602	-1.374	0.112924	1.77492	0.880396	1.662	0.767472	-0.894523	16.8055	2.85156	0.066792	0.631208
SLC12A4	0.302332	0.0487277	0.34923	0.222284	0.0800479	-0.173556	0.126946	-0.253604	0.046898	0.300502	19.9093	2.84952	0.0669186	0.631208
PHF5A	0.818479	0.513056	0.136968	0.0385759	0.779903	0.47448	0.098392	-0.305423	-0.681511	-0.376088	20.4283	2.85388	0.067009	0.631208
MRPS24	-0.524346	0.136883	-0.228395	-0.50594	-0.0184053	0.642823	0.277545	0.661228	0.29595	-0.365278	19.5901	2.84638	0.0671142	0.631208
TOR3A	-1.74368	0.941346	1.07445	0.0011038	-1.74478	0.940242	1.07334	2.68502	2.81813	0.133101	17.4763	2.84686	0.0671663	0.631208
NFIC	-0.119693	0.215001	0.0952359	-0.15808	0.0383877	0.373082	0.253316	0.334694	0.214929	-0.119766	20.2721	2.84464	0.0672227	0.631208
PSMD10	-0.449644	-1.08472	-2.47137	-2.82226	2.37262	1.73755	0.350893	-0.635075	-2.02173	-1.38665	17.2688	2.85029	0.0673529	0.631208
PSPH	-0.215046	-0.421307	-0.463635	-0.833146	0.6181	0.411839	0.369511	-0.206261	-0.248589	-0.0423279	21.1865	2.84942	0.0674068	0.631208
CLIP2	0.210319	0.0579168	0.376814	0.246457	-0.0361384	-0.18854	0.130357	-0.152402	0.166495	0.318897	20.0221	2.84169	0.0674077	0.631208
SPCS2	0.0413392	-0.134123	0.424526	-0.173709	0.215048	0.0395856	0.598235	-0.175462	0.383187	0.55865	22.2673	2.83916	0.0675666	0.631208
PEX16	1.82214	-0.389777	-0.0112769	0.274173	1.54797	-0.663949	-0.285449	-2.21191	-1.83341	0.3785	18.0365	2.83689	0.0677094	0.631208
RAB3B	0.567301	0.354479	0.524958	0.258019	0.309281	0.0964591	0.266939	-0.212822	-0.0423425	0.17048	19.1912	2.83609	0.0677599	0.631208
CBL	-0.0554961	0.314318	0.257239	0.201276	-0.256772	0.113042	0.0559629	0.369814	0.312735	-0.0570786	20.0147	2.83575	0.0677815	0.631208
PDHX	0.0153931	0.232151	0.20871	-0.0515332	0.0669263	0.283684	0.260243	0.216758	0.193317	-0.023441	20.5661	2.8339	0.0678982	0.631208
MCRS1	-0.00853722	0.354445	1.18581	0.647378	-0.655915	-0.292933	0.538428	0.362982	1.19434	0.831361	17.3166	2.83255	0.0679832	0.631208
ZNF532	0.983724	0.964792	0.813222	1.63583	-0.652103	-0.671034	-0.822605	-0.0189314	-0.170502	-0.15157	17.093	2.83206	0.0680147	0.631208
COX15	-0.0967719	-0.878563	-2.00719	0.871394	-0.968166	-1.74996	-2.87858	-0.781792	-1.91042	-1.12863	17.0408	2.82822	0.0682585	0.631753
CDC42EP1	-0.189965	-0.413328	-0.614424	-0.395227	0.205262	-0.0181017	-0.219197	-0.223363	-0.424459	-0.201096	20.2654	2.82755	0.0683007	0.631753
CHORDC1	-0.351018	-0.306957	-0.11929	-0.380132	0.029114	0.0731753	0.260842	0.0440613	0.231728	0.187666	22.3581	2.82162	0.0686792	0.632036
HDDC2	-0.952166	-0.0430633	0.221775	-0.568544	-0.383621	0.525481	0.790319	0.909102	1.17394	0.264838	18.4152	2.82025	0.0687675	0.632036
DDB2	0.126029	-0.0389753	-0.328423	0.105205	0.020824	-0.144181	-0.433629	-0.165005	-0.454453	-0.289448	19.572	2.82004	0.0687805	0.632036
TTC27	-0.246565	0.142225	0.614866	-0.326252	0.0796869	0.468477	0.941118	0.38879	0.861431	0.472641	18.634	2.81864	0.0688709	0.632036
DNAJB4	-0.385865	0.137555	-0.199686	-0.592432	0.206567	0.729988	0.392746	0.52342	0.186179	-0.337242	18.3639	2.81697	0.0689778	0.632036
PDRG1	0.254218	0.23975	-0.311243	0.167244	0.0869735	0.0725063	-0.478487	-0.0144672	-0.565461	-0.550994	19.23	2.81642	0.0690135	0.632036
CLNS1A	-0.53057	-0.192757	-0.100253	-0.666305	0.135735	0.473549	0.566053	0.337813	0.430317	0.0925041	21.4849	2.8173	0.0691638	0.632371
DNM1	0.0828534	0.00793052	0.396225	0.0548236	0.0280297	-0.0468931	0.341402	-0.0749229	0.313372	0.388295	20.4177	2.80994	0.0694321	0.633782
ABCD1	-0.952883	0.0609504	0.405976	-0.135718	-0.817164	0.196669	0.541694	1.01383	1.35886	0.345025	16.9221	2.80243	0.0699211	0.636418
VLDLR	-0.094346	-0.140665	-0.306085	-0.848414	0.754068	0.707749	0.542329	-0.0463187	-0.211739	-0.16542	18.4162	2.79851	0.0701777	0.636418
CCDC43	0.274431	-0.351641	1.16983	0.0767734	0.197657	-0.428415	1.09306	-0.626072	0.895401	1.52147	18.276	2.79764	0.0702345	0.636418
COX18	-0.333203	-0.539429	-1.67631	0.147168	-0.480371	-0.686597	-1.82347	-0.206226	-1.3431	-1.13688	16.3835	2.79754	0.0702416	0.636418
TAF8	-0.555445	0.343102	0.462049	-0.640264	0.0848189	0.983366	1.10231	0.898547	1.01749	0.118947	16.5759	2.79633	0.0703206	0.636418
RUFY1	0.272114	0.566653	0.477826	0.203481	0.0686331	0.363172	0.274345	0.294539	0.205712	-0.0888275	19.5229	2.79501	0.0704078	0.636418
N4BP1	1.22364	0.82172	0.950451	-0.677116	1.90075	1.49884	1.62757	-0.401916	-0.273186	0.12873	16.7438	2.78957	0.0707668	0.638625
NDUFAF7	-0.0361773	-0.031642	0.582261	1.11642	-1.1526	-1.14806	-0.534158	0.00453531	0.618438	0.613903	16.5374	2.78667	0.0709596	0.638885
SDHA	-0.159532	-0.1878	-0.365255	-0.0700792	-0.0894526	-0.117721	-0.295176	-0.0282683	-0.205723	-0.177455	21.0048	2.78435	0.0711137	0.638885
IGF2R	0.263539	0.219107	0.512666	0.152643	0.110897	0.0664644	0.360023	-0.0444321	0.249127	0.293559	21.5208	2.77973	0.0714225	0.638885
ANAPC4	0.805793	0.45768	0.225255	0.271882	0.533911	0.185798	-0.046627	-0.348113	-0.580538	-0.232425	18.9378	2.77925	0.0714541	0.638885
SYNGR1	0.543709	-0.669555	-0.49077	0.0628186	0.48089	-0.732374	-0.553589	-1.21326	-1.03448	0.178785	19.1	2.77671	0.0716248	0.638885
TSG101	-0.293272	-0.228821	-0.191206	-0.26991	-0.0233619	0.0410891	0.0787034	0.064451	0.102065	0.0376143	21.6021	2.77531	0.0717186	0.638885
GPX7	-0.259198	-1.12631	-1.43036	-0.171742	-0.0874559	-0.954569	-1.25862	-0.867113	-1.17116	-0.304051	16.5007	2.77333	0.0718519	0.638885
ANAPC16	-0.272037	-0.575489	-0.512873	0.541153	-0.81319	-1.11664	-1.05403	-0.303452	-0.240836	0.0626161	18.4771	2.77258	0.0719026	0.638885
PNPO	-0.494618	-0.16696	-0.349043	-0.426746	-0.0678722	0.259785	0.0777024	0.327658	0.145575	-0.182083	21.1598	2.77022	0.072062	0.638885
FAM114A2	-0.0762986	0.0690213	0.179925	-0.177515	0.101217	0.246537	0.357441	0.14532	0.256224	0.110904	19.8503	2.76956	0.0721063	0.638885
CD99	0.658243	-1.27252	-1.26446	-0.897173	1.55542	-0.375344	-0.367291	-1.93076	-1.92271	0.00805346	18.1568	2.76889	0.0721521	0.638885
GALT	-0.508004	1.07206	-0.397153	-0.503011	-0.00499338	1.57507	0.105858	1.58006	0.110851	-1.46921	18.3565	2.76794	0.0722161	0.638885
CISD2	-0.277892	-0.0899906	-0.403287	-0.0427801	-0.235112	-0.0472104	-0.360507	0.187901	-0.125395	-0.313296	20.601	2.76686	0.0722897	0.638885
SKA3	-0.473953	-0.229582	-0.255458	-0.255339	-0.218614	0.0257566	-0.000119137	0.244371	0.218495	-0.0258758	19.0103	2.7648	0.072429	0.6391
CD9	0.221783	0.152856	0.409195	0.396235	-0.174452	-0.243379	0.0129597	-0.0689268	0.187412	0.256338	22.516	2.76006	0.0727525	0.640307
GTF3C4	0.0439776	0.297527	0.571746	0.185882	-0.141905	0.111645	0.385864	0.253549	0.527768	0.274219	18.5156	2.75942	0.0727962	0.640307
AMPH	0.0611143	-0.0410693	-0.0482208	0.377182	-0.316068	-0.418251	-0.425403	-0.102184	-0.109335	-0.0071515	20.2706	2.75469	0.0731205	0.641097
LNPK	0.272194	-0.0499056	0.314404	0.0559391	0.216255	-0.105845	0.258465	-0.3221	0.04221	0.36431	19.7642	2.7543	0.0731473	0.641097
VARS1	-0.128352	0.0291783	-0.108363	-0.158368	0.0300161	0.187547	0.0500051	0.15753	0.0199891	-0.137541	23.0761	2.75256	0.073267	0.641097
RAP2B	0.186867	-0.203672	-0.0199488	0.122158	0.0647087	-0.32583	-0.142107	-0.390538	-0.206816	0.183723	20.8555	2.75139	0.0733473	0.641097
MKNK1	-1.49722	-0.746204	-1.25964	-1.26716	-0.230063	0.520954	0.007515	0.751017	0.237578	-0.513439	18.1242	2.74516	0.0737789	0.643857
KCTD12	1.2073	-0.272904	-0.130494	0.41496	0.792338	-0.687864	-0.545453	-1.4802	-1.33779	0.14241	18.2292	2.7353	0.0744662	0.648622
AGPAT4	1.22242	0.841434	1.49721	0.344446	0.877969	0.496987	1.15276	-0.380981	0.274791	0.655772	17.0987	2.73331	0.0746065	0.648622
DYNLRB1	0.277724	1.33956	-0.549974	0.475766	-0.198043	0.863794	-1.02574	1.06184	-0.827698	-1.88953	18.6064	2.73139	0.0748586	0.648622
EIF3K	-0.279778	-0.0273827	-0.221368	-0.161647	-0.118131	0.134264	-0.059721	0.252395	0.0584099	-0.193985	21.8594	2.72916	0.0748989	0.648622
EIF2S2	-0.1756	-0.173237	-0.290704	-0.24319	0.0675899	0.0699532	-0.0475143	0.00236323	-0.115104	-0.117467	21.7481	2.72659	0.0750803	0.648622
TIMMDC1	-0.454682	-0.218313	-0.491926	-0.632729	0.178047	0.414416	0.140803	0.236369	-0.0372435	-0.273612	19.3024	2.72304	0.0753323	0.648622
EIF5B	-0.143845	0.0708838	-0.024536	-0.120581	-0.0232638	0.191465	0.0960454	0.214729	0.119309	-0.0954198	23.0215	2.71802	0.0756898	0.648622
MED22	-0.622496	-0.456825	-0.202594	0.411549	-1.03404	-0.868374	-0.614143	0.165671	0.419902	0.254231	17.7102	2.71675	0.0757806	0.648622
LSM3	0.110636	-0.234518	-0.195264	0.0826868	0.0279495	-0.317205	-0.277951	-0.345155	-0.305901	0.0392541	21.1694	2.71557	0.0758647	0.648622
NARS1	-0.22513	0.0220486	-0.00942106	-0.226589	0.00145879	0.248638	0.217168	0.247179	0.215709	-0.0314696	23.2304	2.71547	0.0758719	0.648622
RCN1	-0.0824111	-0.137107	-0.17946	-0.0534014	-0.0290097	-0.0837055	-0.126059	-0.0546958	-0.0970492	-0.0423534	24.1671	2.71384	0.0759889	0.648622
AVL9	-0.226961	0.398731	0.205139	-0.0367415	-0.190219	0.435472	0.241881	0.625691	0.4321	-0.193591	18.6072	2.71378	0.0759932	0.648622
S100A11	0.33567	-0.187666	0.0404344	0.369266	-0.0335955	-0.556931	-0.328831	-0.523336	-0.295236	0.2281	23.289	2.71648	0.0760415	0.648622
MAPRE1	-0.00528763	-0.198529	-0.184383	0.143724	-0.149011	-0.342252	-0.328107	-0.193241	-0.179096	0.0141454	23.2462	2.71237	0.0760948	0.648622
TTC21A	-0.83974	-0.816121	-3.02319	-1.53553	0.695793	0.719412	-1.48766	0.0236191	-2.18345	-2.20707	17.1461	2.7116	0.0762356	0.648622
DBI	0.385031	-0.00899224	0.546191	0.598487	-0.213455	-0.607479	-0.0522961	-0.394024	0.161159	0.555183	21.829	2.71698	0.0762674	0.648622
CALM1	0.340394	-0.447611	-0.441207	0.344329	-0.00393501	-0.79194	-0.785536	-0.788005	-0.781601	0.00640431	23.9332	2.75005	0.0763084	0.648622
KIAA1522	0.199818	-0.364461	-0.0804539	0.494418	-0.2946	-0.858879	-0.574872	-0.564279	-0.280272	0.284007	18.7687	2.70532	0.0766029	0.649065
EZR	0.192431	0.0801565	0.179262	0.0956875	0.0967438	-0.015531	0.0835742	-0.112275	-0.0131696	0.0991052	24.316	2.70442	0.076668	0.649065
SQLE	0.153328	-0.138508	0.26679	0.245031	-0.0917037	-0.383539	0.0217582	-0.291835	0.113462	0.405297	19.724	2.70379	0.076714	0.649065
CHEK1	-0.922411	-0.167048	-0.587869	-0.229599	-0.692812	0.062551	-0.35827	0.755363	0.334542	-0.420821	19.0229	2.70217	0.0768314	0.649065
CGAS	-0.207938	-0.0747798	-1.34899	-1.16066	0.952718	1.08588	-0.188329	0.133158	-1.14105	-1.27421	16.7572	2.69838	0.0771075	0.649065
NEMF	-0.117531	0.165311	0.135409	-0.0877374	-0.0297935	0.253048	0.223147	0.282842	0.25294	-0.0299016	20.6221	2.68985	0.0777321	0.649065
ACO2	-0.018737	0.0228113	-0.138038	0.123604	-0.142341	-0.100793	-0.261642	0.0415483	-0.119301	-0.160849	22.2436	2.68934	0.0777702	0.649065
ATF1	1.27208	0.573406	1.66615	0.789137	0.482948	-0.215731	0.877015	-0.698679	0.394067	1.09275	17.7355	2.68928	0.0777741	0.649065
EIF2B4	-0.306666	-0.0875216	-0.181946	-0.391467	0.0848006	0.303945	0.20952	0.219144	0.12472	-0.0944245	21.3193	2.68812	0.07786	0.649065
CAMK2D	0.177087	-0.181609	0.0194117	0.202048	-0.0249607	-0.383658	-0.182636	-0.358697	-0.157676	0.201021	20.7589	2.68808	0.0778626	0.649065
CCDC50	-0.356594	-0.33569	-0.54322	-0.326272	-0.0303217	-0.00941833	-0.216948	0.0209034	-0.186626	-0.20753	21.0657	2.68739	0.0779137	0.649065
ALDH1B1	-0.167386	-0.345438	-0.420936	-0.242905	0.0755192	-0.102533	-0.178031	-0.178052	-0.25355	-0.0754978	20.6037	2.68686	0.0779529	0.649065
AARS2	-0.316004	0.00475865	-0.156508	-0.134369	-0.181635	0.139127	-0.022139	0.320763	0.159496	-0.161266	19.8377	2.68611	0.0780082	0.649065
ALDH9A1	-0.0321321	0.299639	0.137506	0.015047	-0.0471791	0.284592	0.122459	0.331772	0.169638	-0.162133	22.1714	2.68366	0.0781892	0.649065
EPM2AIP1	0.462447	-0.059413	0.0834045	0.306604	0.155842	-0.366017	-0.2232	-0.52186	-0.379042	0.142817	19.1102	2.68061	0.0784156	0.649065
EIF4B	0.328147	-0.0899475	-0.190342	0.0190536	0.309093	-0.109001	-0.209396	-0.418094	-0.518489	-0.100395	23.5208	2.67898	0.0785373	0.649065
EBNA1BP2	-0.187535	-0.0310481	-0.215742	-0.247597	0.0600616	0.216549	0.0318546	0.156487	-0.0282071	-0.184694	22.2906	2.67855	0.0785688	0.649065
SF3B4	0.0166226	-0.136885	1.86419	0.125528	-0.108905	-0.262413	1.73867	-0.153508	1.84757	2.00108	21.6928	2.76123	0.0785891	0.649065
MSRB2	-0.524335	0.0970113	0.506962	-1.02665	0.502312	1.12366	1.53361	0.621347	1.0313	0.40995	16.565	2.67801	0.0786096	0.649065
MSH6	-0.0602696	0.276081	0.19097	0.0472171	-0.107487	0.228863	0.143753	0.33635	0.25124	-0.08511	22.1947	2.67497	0.0788367	0.649065
TFAP4	-0.810185	-0.972263	0.448248	-0.95595	0.145764	-0.016313	1.4042	-0.162077	1.25843	1.42051	16.673	2.67414	0.0788982	0.649065
CUL1	0.289928	-0.816799	-0.152544	-0.335873	0.625801	-0.480925	0.183329	-1.10673	-0.442472	0.664254	18.6333	2.67373	0.0789293	0.649065
STAG2	-1.55314	0.175896	-0.947412	-0.700364	-0.852775	0.87626	-0.247047	1.72904	0.605728	-1.12331	16.565	2.6721	0.0790509	0.649105
ULBP2	-0.916306	-1.03923	-0.869369	-0.426104	-0.490202	-0.613124	-0.443265	-0.122922	0.046937	0.169859	17.9893	2.6658	0.0795254	0.651607
SMPDL3B	-0.474359	-0.143813	-0.427212	-0.708509	0.23415	0.564696	0.281298	0.330546	0.0471478	-0.283398	18.8212	2.66494	0.0795901	0.651607
TMEM63B	-1.07625	-1.7041	0.196222	0.193423	-1.26967	-1.89753	0.00279947	-0.627856	1.27247	1.90033	17.1388	2.66082	0.0799021	0.651691
ELAVL2	0.634727	0.551613	-0.11909	1.11699	-0.482261	-0.565376	-1.23608	-0.0831149	-0.753817	-0.670703	17.4501	2.65934	0.0800151	0.651691
CFAP45	-1.37086	-0.642964	-1.38988	-2.29673	0.92587	1.65376	0.906848	0.727891	-0.0190214	-0.746913	17.0432	2.65879	0.0800571	0.651691
CCT6A	-0.197437	0.00503576	0.0257923	-0.114662	-0.0827742	0.119698	0.140455	0.202472	0.223229	0.0207566	24.2058	2.65863	0.0800692	0.651691
KPNB1	-0.181542	0.0402286	0.00977201	-0.0987636	-0.0827785	0.138992	0.108536	0.221771	0.191314	-0.0304566	24.2954	2.65678	0.08021	0.651882
SESN2	-0.712474	-0.636959	-1.11192	-0.676578	-0.0358962	0.039619	-0.435345	0.0755152	-0.399449	-0.474964	17.2556	2.6473	0.0809361	0.656823
PDGFRB	0.014298	-0.578699	0.124222	-0.0420602	0.0563582	-0.536638	0.166282	-0.592997	0.109923	0.70292	18.8573	2.64395	0.081195	0.657659
CSNK2A2	0.0415724	-0.115707	-0.19048	0.00964684	0.0319256	-0.125353	-0.200127	-0.157279	-0.232052	-0.0747731	20.6175	2.64253	0.0813048	0.657659
AKT1S1	0.134798	-0.277177	-0.0952018	0.294151	-0.159353	-0.571328	-0.389353	-0.411975	-0.23	0.181975	20.3072	2.64137	0.0813941	0.657659
HLA-A	-0.415587	-0.21278	-0.505504	-0.359496	-0.056091	0.146716	-0.146007	0.202807	-0.0899163	-0.292724	21.1336	2.63777	0.0816739	0.658855
SEC13	-0.447446	-0.0429702	0.84768	-0.505635	0.058189	0.462665	1.35332	0.404476	1.29513	0.89065	19.6058	2.63985	0.0823424	0.658855
SS18	0.492804	-0.399875	-0.734914	-0.173383	0.666187	-0.226492	-0.56153	-0.892679	-1.22772	-0.335039	19.0253	2.6291	0.0823519	0.658855
OAT	-0.150633	-0.287457	-0.069611	-0.309487	0.158854	0.0220302	0.239876	-0.136824	0.0810221	0.217846	22.4335	2.62828	0.0824164	0.658855
GET3	-0.16261	-0.0313109	0.0546806	-0.192896	0.0302855	0.161585	0.247576	0.131299	0.217291	0.0859915	22.7918	2.62658	0.0825498	0.658855
AFF4	0.227613	0.429811	0.447309	0.461147	-0.233533	-0.031336	-0.0138374	0.202197	0.219696	0.0174985	19.3403	2.62576	0.082614	0.658855
TFCP2	-1.68339	0.493861	0.0140327	-1.17653	-0.506862	1.67039	1.19056	2.17725	1.69742	-0.479828	17.7043	2.62573	0.0826169	0.658855
NDUFS4	0.116141	-0.0282491	0.300453	0.00139287	0.114748	-0.029642	0.299061	-0.14439	0.184312	0.328703	21.0835	2.62519	0.0826596	0.658855
MTCL1	-0.409967	0.36097	-0.634353	-0.0088449	-0.401122	0.369815	-0.625508	0.770937	-0.224386	-0.995323	17.3599	2.62403	0.0827507	0.658855
SMCHD1	-0.190259	0.091724	0.164728	-0.159154	-0.031105	0.250878	0.323883	0.281983	0.354988	0.0730045	21.1911	2.62324	0.0828136	0.658855
BICD2	0.048394	-0.281267	-0.438233	0.0135934	0.0348006	-0.29486	-0.451826	-0.329661	-0.486627	-0.156966	18.7681	2.62283	0.0828457	0.658855
LONP1	-0.285829	-0.0964259	-0.138843	-0.39022	0.104391	0.293794	0.251377	0.189403	0.146986	-0.0424173	21.1905	2.62128	0.0829684	0.658888
YWHAG	-0.129355	0.0783512	0.129508	0.0451697	-0.174525	0.0331815	0.084338	0.207706	0.258863	0.0511565	24.2054	2.61758	0.083262	0.659352
SUMF1	1.41045	1.62069	0.556839	0.191877	1.21857	1.42882	0.364962	0.210247	-0.853607	-1.06385	18.1735	2.61755	0.0832641	0.659352
SUPT7L	0.821671	-0.2742	-0.606013	-1.29355	2.11522	1.01935	0.687538	-1.09587	-1.42768	-0.331813	16.88	2.61544	0.083432	0.659742
KATNB1	-0.292141	0.270184	0.458082	-0.131779	-0.160362	0.401964	0.589861	0.562326	0.750223	0.187898	19.1411	2.61191	0.0837138	0.660422
PFAS	-0.163307	0.0242735	0.0918367	-0.107331	-0.0559764	0.131604	0.199168	0.187581	0.255144	0.0675632	21.8746	2.61074	0.083808	0.660422
GEMIN5	-0.227694	-0.134692	-0.255914	-0.294211	0.0665175	0.159519	0.0382973	0.0930014	-0.0282201	-0.121222	20.0464	2.60926	0.0839263	0.660422
PCDHB18P	0.992854	1.90745	0.91066	0.021313	0.971541	1.88614	0.889347	0.914595	-0.0821945	-0.99679	17.1228	2.60842	0.0839932	0.660422
TMX1	-0.0971882	0.0620009	0.0944534	-0.0918488	-0.00533944	0.15385	0.186302	0.159189	0.191642	0.0324525	23.3984	2.60336	0.0844012	0.662692
DHX57	-0.351995	-0.297911	-0.251499	-0.703627	0.351632	0.405716	0.452128	0.0540841	0.100496	0.0464122	18.6961	2.59945	0.0847174	0.662981
ACOX1	0.403152	0.0846374	0.200575	0.469415	-0.0662631	-0.384778	-0.26884	-0.318514	-0.202577	0.115938	19.3229	2.59873	0.0847759	0.662981
RAB6A	0.132695	0.118946	0.590784	0.172028	-0.0393322	-0.053082	0.418756	-0.0137498	0.458089	0.471838	22.609	2.59785	0.0848468	0.662981
TEX10	-0.191325	0.0427619	1.19319	-0.369766	0.178441	0.412528	1.56295	0.234087	1.38451	1.15042	18.5306	2.59581	0.085013	0.662981
WRNIP1	-0.560225	0.217173	0.318004	-0.0683365	-0.491888	0.28551	0.386341	0.777398	0.878229	0.100831	18.9935	2.59555	0.0850342	0.662981
TMED5	-0.764332	-0.515887	-0.91526	-0.770668	0.00633656	0.254781	-0.144591	0.248445	-0.150928	-0.399373	21.1898	2.5994	0.0855468	0.665358
PPP6R2	1.11303	0.327868	0.156596	2.5229	-1.40987	-2.19504	-2.36631	-0.785167	-0.956439	-0.171272	18.3454	2.60396	0.0855786	0.665358
NOP9	-0.892649	-0.714664	0.604464	-0.132281	-0.760368	-0.582383	0.736745	0.177984	1.49711	1.31913	16.99	2.58533	0.0858708	0.665511
IARS1	-0.302881	-0.0498637	-0.157281	-0.27581	-0.0270714	0.225946	0.118529	0.253018	0.1456	-0.107418	22.343	2.58384	0.0859928	0.665511
L1RE1	-1.10144	-1.1147	0.262447	-0.711272	-0.390169	-0.403427	0.973719	-0.0132576	1.36389	1.37715	17.0753	2.58082	0.0862428	0.665511
PPP1R35	0.115222	0.119033	-0.707667	0.155983	-0.0407607	-0.0369493	-0.863649	0.00381145	-0.822889	-0.8267	15.9666	2.57451	0.0867664	0.665511
MFGE8	0.56225	0.239944	0.827292	0.335892	0.226358	-0.0959479	0.491401	-0.322306	0.265042	0.587348	21.2608	2.57801	0.0869992	0.665511
TMX3	0.214393	-0.0662793	0.228989	0.0395016	0.174891	-0.105781	0.189487	-0.280672	0.014596	0.295268	20.9783	2.57157	0.0870112	0.665511
MAN1A2	1.94094	0.261591	0.490419	0.823591	1.11735	-0.562001	-0.333172	-1.67935	-1.45052	0.228828	17.1217	2.57131	0.0870334	0.665511
PPIG	-0.316228	0.264398	0.796785	-0.116634	-0.199594	0.381032	0.91342	0.580626	1.11301	0.532387	20.0859	2.57721	0.0872442	0.665511
APPL1	-0.0295694	-0.196585	-0.000749569	0.233508	-0.263077	-0.430093	-0.234258	-0.167016	0.0288199	0.195836	20.0994	2.56729	0.0873699	0.665511
ERBB2	0.115222	-1.04996	-0.615503	-0.202446	0.317668	-0.847514	-0.413057	-1.16518	-0.730725	0.434457	16.2537	2.56569	0.0875036	0.665511
FOXK2	0.280998	-0.166652	0.172358	0.164764	0.116233	-0.331416	0.00759318	-0.447649	-0.10864	0.339009	20.4127	2.56506	0.087557	0.665511
PSME2	-0.194205	-0.0570245	0.00329833	-0.081295	-0.11291	0.0242705	0.0845933	0.137181	0.197503	0.0603229	24.1239	2.56431	0.0876201	0.665511
SLC39A14	-0.278916	0.177111	0.00687692	-0.562029	0.283113	0.739139	0.568905	0.456026	0.285792	-0.170234	18.811	2.56111	0.0878899	0.665511
CERKL	1.51795	4.325	1.59609	1.44874	0.0692051	2.87626	0.147348	2.80705	0.078143	-2.72891	18.3316	2.59927	0.0879634	0.665511
SDCBP	0.41386	-0.237926	-0.0402747	0.195935	0.217925	-0.433861	-0.23621	-0.651786	-0.454134	0.197651	21.353	2.55861	0.088101	0.665511
CAVIN2	-0.513605	-1.40035	-1.82038	-1.28991	0.776309	-0.110434	-0.530468	-0.886743	-1.30678	-0.420035	18.0754	2.5579	0.088161	0.665511
TRADD	-1.02208	-0.929038	-0.907646	-0.782193	-0.239891	-0.146844	-0.125452	0.0930471	0.114439	0.0213922	18.3997	2.55729	0.0882131	0.665511
P3H2	-0.666303	0.247918	-0.70414	0.155983	-0.822286	0.0919353	-0.860123	0.914221	-0.037837	-0.952058	16.0965	2.55609	0.0883148	0.665511
LNPEP	-0.608743	-0.356608	-0.280783	-0.575653	-0.0330896	0.219045	0.29487	0.252135	0.327959	0.0758247	19.8783	2.5543	0.0884675	0.665511
SMC6	-0.191288	0.326398	1.18891	-0.0627638	-0.128524	0.389161	1.25167	0.517685	1.38019	0.862508	18.8751	2.55301	0.0885771	0.665511
GDI1	0.0415265	0.176898	0.109388	-0.0804094	0.121936	0.257307	0.189797	0.135372	0.0678611	-0.0675106	22.7729	2.55211	0.0886538	0.665511
UTP23	-0.797803	-0.102689	-0.335429	-0.312633	-0.485169	0.209944	-0.022796	0.695113	0.462373	-0.23274	19.4641	2.54826	0.0889824	0.665511
SERPINF2	-1.44927	-0.826748	-0.0704877	-1.30862	-0.140654	0.48187	1.23813	0.622524	1.37878	0.756261	17.4711	2.54794	0.0890098	0.665511
NDC80	-0.246856	0.0465273	-0.0901517	-0.0976048	-0.149251	0.144132	0.0074531	0.293383	0.156704	-0.136679	21.0605	2.54649	0.0891345	0.665511
ACSF2	-0.705756	-0.114351	-1.02621	0.025602	-0.731358	-0.139953	-1.05181	0.591405	-0.320454	-0.911859	18.3418	2.54635	0.0891464	0.665511
CTSL	0.413349	-0.123056	-0.204364	0.21627	0.197079	-0.339326	-0.420634	-0.536405	-0.617713	-0.0813076	19.6563	2.54426	0.0893263	0.665511
SCRIB	-0.0544504	0.00112109	-0.170978	0.0335525	-0.0880029	-0.0324314	-0.20453	0.0555715	-0.116527	-0.172099	21.9029	2.54269	0.0894608	0.665511
IGSF3	-0.118458	-0.302145	1.31697	-0.139505	0.0210471	-0.16264	1.45648	-0.183687	1.43543	1.61912	18.6061	2.54324	0.0894673	0.665511
TIGAR	-0.259538	-0.511976	-0.463017	0.0396987	-0.299237	-0.551675	-0.502715	-0.252438	-0.203478	0.0489599	20.998	2.54029	0.0896679	0.665511
RPRD1A	-0.698931	-0.848288	-0.683321	-0.191172	-0.50776	-0.657117	-0.492149	-0.149357	0.0156107	0.164968	18.1776	2.53687	0.089964	0.665511
HNRNPD	-0.00879615	-0.115911	-0.207968	-0.0578289	0.0490327	-0.0580822	-0.150139	-0.107115	-0.199172	-0.0920573	25.5843	2.53594	0.0900446	0.665511
WDR13	-0.245652	0.622489	0.705067	1.1325	-1.37815	-0.510015	-0.427436	0.86814	0.950719	0.0825782	18.1327	2.53482	0.0901423	0.665511
SNX15	-0.364367	-0.540162	-0.382759	-0.629331	0.264964	0.0891695	0.246572	-0.175794	-0.0183917	0.157403	18.9555	2.53218	0.0903718	0.665511
COA4	1.60364	-0.241579	-0.657301	0.458659	1.14498	-0.700239	-1.11596	-1.84521	-2.26094	-0.415722	17.1589	2.53211	0.0903781	0.665511
RAP2C	-0.352156	0.0190905	0.404058	-0.163298	-0.188859	0.182388	0.567356	0.371247	0.756215	0.384968	18.7118	2.53129	0.0904491	0.665511
EGR1	-0.0244834	-0.668979	0.940435	0.417336	-0.44182	-1.08632	0.523098	-0.644496	0.964918	1.60941	16.4295	2.5305	0.0905181	0.665511
GRPEL2	-1.09187	-0.929144	-1.51406	-0.968012	-0.123858	0.0388679	-0.546044	0.162726	-0.422186	-0.584912	17.2294	2.52754	0.0907774	0.665511
ASPH	-0.0374506	0.0906737	0.247151	-0.0257082	-0.0117424	0.116382	0.272859	0.128124	0.284601	0.156477	21.5412	2.52701	0.0908237	0.665511
WDR12	-0.250003	0.101174	0.087424	-0.161366	-0.0886367	0.26254	0.24879	0.351176	0.337427	-0.0137496	21.2569	2.52564	0.0909436	0.665511
KRT9	0.222042	1.0469	0.129857	0.0290623	0.19298	1.01784	0.100794	0.824859	-0.0921858	-0.917045	22.3775	2.56051	0.0909696	0.665511
NPC2	0.129939	0.249989	0.307024	0.730873	-0.600934	-0.480884	-0.42385	0.12005	0.177084	0.0570345	21.0328	2.52432	0.0910597	0.665511
RNF25	0.223426	0.424132	-0.135637	0.341581	-0.118155	0.0825512	-0.477218	0.200706	-0.359063	-0.559769	19.4021	2.52326	0.0911529	0.665511
MED1	0.486155	-0.797732	0.614577	1.34141	-0.855258	-2.13915	-0.726837	-1.28389	0.128421	1.41231	16.6367	2.5193	0.0915016	0.665511
MRPL57	0.200612	0.243159	-0.288792	-0.381708	0.582319	0.624867	0.0929161	0.0425476	-0.489403	-0.531951	19.5824	2.51861	0.0915632	0.665511
TMEM181	0.0450608	0.0981785	1.29974	0.0876618	-0.042601	0.0105167	1.21207	0.0531177	1.25468	1.20156	18.1697	2.51642	0.0917565	0.665511
PUM3	-0.271957	-0.157628	-0.245231	-0.327018	0.0550612	0.16939	0.0817869	0.114328	0.0267257	-0.0876027	20.8466	2.51238	0.0921155	0.665511
PLXNB2	0.0976667	-0.0511968	0.00656517	0.213907	-0.11624	-0.265103	-0.207341	-0.148864	-0.0911015	0.057762	22.5783	2.51168	0.0921778	0.665511
CDCA8	-0.457513	0.315843	-0.447767	-0.392293	-0.0652206	0.708136	-0.0554744	0.773356	0.00974613	-0.76361	18.6555	2.51148	0.0921959	0.665511
NCAPG2	-1.34435	-1.36098	-1.29882	-1.62521	0.280859	0.264231	0.326394	-0.0166281	0.0455348	0.0621629	17.7555	2.51099	0.0922395	0.665511
HTRA2	0.173173	-0.0157619	0.40887	-0.253045	0.426218	0.237283	0.661914	-0.188935	0.235697	0.424632	19.859	2.51092	0.092246	0.665511
EGFR	0.875541	1.54842	1.46427	0.290772	0.584769	1.25765	1.1735	0.672883	0.588726	-0.0841564	17.6417	2.51044	0.0922884	0.665511
GLG1	0.865324	-0.433004	-0.643202	0.683009	0.182316	-1.11601	-1.32621	-1.29833	-1.50853	-0.210198	17.5406	2.50863	0.0924502	0.665511
NDFIP1	0.870643	-0.478222	1.72237	0.322155	0.548488	-0.800377	1.40021	-1.34886	0.851724	2.20059	17.0017	2.50784	0.0925206	0.665511
EMC4	0.545354	-0.0179926	0.446588	0.0948773	0.450477	-0.11287	0.351711	-0.563347	-0.0987661	0.464581	19.6747	2.50762	0.0925405	0.665511
TMCC1	-0.291069	-0.330109	0.136787	-1.15291	0.861843	0.822803	1.2897	-0.0390398	0.427857	0.466897	16.2306	2.50654	0.0926371	0.665511
LUC7L2	0.249114	-0.169562	-0.0332216	0.101515	0.147599	-0.271078	-0.134737	-0.418677	-0.282336	0.136341	21.3597	2.50613	0.0926743	0.665511
IGFBP7	0.870034	0.570197	1.97417	1.87913	-1.0091	-1.30893	0.0950372	-0.299837	1.10413	1.40397	19.6393	2.54269	0.0927417	0.665511
CCDC85C	-0.131334	-0.759843	-1.7185	-0.187255	0.0559207	-0.572589	-1.53124	-0.628509	-1.58717	-0.958656	16.6382	2.50531	0.0927475	0.665511
ASAP1	0.0100929	0.185081	0.362095	0.108963	-0.0988706	0.0761175	0.253131	0.174988	0.352002	0.177014	20.3428	2.50474	0.0927984	0.665511
RPLP2	0.385208	0.185364	-0.025891	0.364083	0.0211249	-0.178719	-0.389974	-0.199844	-0.411099	-0.211255	24.9749	2.50393	0.0928744	0.665511
SEMA7A	-0.361075	-0.518141	-0.183846	-1.62536	1.26428	1.10721	1.44151	-0.157066	0.177229	0.334294	16.729	2.50256	0.0929945	0.665511
RSAD1	-1.48697	-0.482696	-0.758996	-1.18662	-0.300341	0.703928	0.427628	1.00427	0.727969	-0.2763	16.6862	2.50191	0.0930528	0.665511
MPC1	0.835267	-0.469206	-1.30106	-0.0592852	0.894552	-0.409921	-1.24178	-1.30447	-2.13633	-0.831855	17.0044	2.49799	0.0934065	0.665511
CLDND1	-0.287417	-0.24928	0.485459	0.0699796	-0.357396	-0.319259	0.41548	0.0381369	0.772876	0.734739	18.7546	2.49786	0.0934187	0.665511
GAA	-0.267362	0.00344019	-0.327032	-0.225671	-0.0416905	0.229111	-0.101361	0.270802	-0.0596707	-0.330473	20.8594	2.49626	0.0935636	0.665511
TRIAP1	0.115222	-1.50862	-1.6812	-0.533844	0.649065	-0.974781	-1.14735	-1.62385	-1.79642	-0.172573	16.6248	2.49624	0.0935646	0.665511
NCK1	0.0389714	-0.376975	-0.136213	-0.179036	0.218007	-0.197939	0.0428227	-0.415946	-0.175185	0.240762	20.1241	2.49564	0.0936192	0.665511
NSMCE2	-0.339368	0.105222	-0.132603	0.108758	-0.448126	-0.00353616	-0.241361	0.44459	0.206765	-0.237825	19.7664	2.49147	0.0939982	0.66669
PTCD1	-1.19224	-1.53439	-0.661767	-0.393707	-0.798532	-1.14068	-0.268061	-0.342152	0.530471	0.872623	16.902	2.48913	0.0942117	0.66669
DDX27	-0.24314	-0.0887754	-0.0533371	-0.268725	0.0255854	0.17995	0.215388	0.154365	0.189803	0.0354383	21.0217	2.48897	0.0942261	0.66669
ZC3H13	0.416861	0.289238	0.121322	-0.0351934	0.452054	0.324431	0.156516	-0.127623	-0.295538	-0.167915	20.0075	2.48806	0.094309	0.66669
LDLR	0.36583	0.224837	0.563117	0.311391	0.0544391	-0.0865536	0.251726	-0.140993	0.197286	0.338279	19.0278	2.48666	0.0944375	0.66669
WDR6	0.134044	-1.67131	-1.61013	-0.928825	1.06287	-0.742488	-0.681308	-1.80536	-1.74418	0.0611805	17.3087	2.48407	0.0946746	0.66669
TOR1B	0.447753	0.222772	0.747123	0.111898	0.335855	0.110875	0.635225	-0.224981	0.29937	0.52435	18.4804	2.48327	0.0947486	0.66669
BEND3	-0.339755	0.00820816	-0.354069	-0.403481	0.0637261	0.411689	0.0494126	0.347963	-0.0143135	-0.362277	21.0872	2.4807	0.0949846	0.66669
TPM2	-0.19747	-0.395377	-0.275579	-0.108565	-0.088905	-0.286812	-0.167014	-0.197907	-0.0781089	0.119798	22.9017	2.47841	0.095196	0.66669
CLU	-0.249884	-0.170686	-0.365921	-0.0126034	-0.237281	-0.158083	-0.353318	0.0791977	-0.116037	-0.195235	20.1545	2.47799	0.0952346	0.66669
PFN3	1.3795	0.463633	-0.826309	-0.674563	2.05406	1.1382	-0.151746	-0.915869	-2.20581	-1.28994	18.2257	2.483	0.0953103	0.66669
MEPCE	-0.320215	0.448569	0.241272	-0.259658	-0.0605572	0.708227	0.50093	0.768784	0.561487	-0.207297	18.9967	2.4771	0.0953169	0.66669
PYGL	-0.106027	0.0941721	0.173195	-0.133149	0.0271223	0.227321	0.306345	0.200199	0.279222	0.0790234	21.4232	2.47584	0.0954335	0.66669
DNAJA3	-0.332031	-0.089124	-0.182608	-0.194439	-0.137592	0.105315	0.0118315	0.242907	0.149423	-0.0934837	21.4778	2.47551	0.0954641	0.66669
ATP6V0D1	0.110577	-0.126503	-0.0807651	0.136408	-0.0258313	-0.262911	-0.217173	-0.23708	-0.191342	0.0457382	21.0321	2.47239	0.0957536	0.667353
FAM234A	0.0784894	0.0485773	-0.470493	0.339944	-0.261454	-0.291366	-0.810436	-0.0299121	-0.548982	-0.51907	18.2072	2.47132	0.0958536	0.667353
RBM33	-0.420403	-0.500485	-0.512172	-0.381392	-0.0390113	-0.119093	-0.13078	-0.0800813	-0.0917685	-0.0116873	19.138	2.46843	0.0961225	0.667353
ASDURF	-0.158629	0.679922	0.10801	-0.180023	0.0213943	0.859945	0.288033	0.838551	0.266639	-0.571912	18.3554	2.46634	0.0963174	0.667353
PAK1IP1	0.161982	0.756016	0.114904	-0.0414719	0.203454	0.797488	0.156376	0.594034	-0.0470781	-0.641112	18.9368	2.4662	0.0963307	0.667353
PARP12	0.528319	0.81217	0.889188	2.19965	-1.67133	-1.38748	-1.31046	0.283851	0.360869	0.0770176	17.061	2.46579	0.0963691	0.667353
KIAA1755	-2.09956	-6.03354	-1.82002	-3.71087	1.6113	-2.32268	1.89084	-3.93398	0.279541	4.21352	18.6359	2.53891	0.0964631	0.667353
ZYX	0.133317	-0.236889	-0.120412	0.0586993	0.074618	-0.295589	-0.179111	-0.370207	-0.253729	0.116478	23.2489	2.46263	0.0966655	0.667353
RAB3GAP2	0.0447203	0.312951	0.212442	0.205336	-0.160615	0.107616	0.00710649	0.268231	0.167722	-0.100509	20.6005	2.46153	0.0967687	0.667353
ADO	-0.479034	-0.30029	-0.465825	-0.0895511	-0.389483	-0.210739	-0.376274	0.178744	0.0132087	-0.165535	19.662	2.46136	0.0967851	0.667353
INTS14	-0.223915	-0.115257	0.770002	0.111784	-0.335699	-0.227041	0.658218	0.108657	0.993917	0.885259	18.6809	2.46036	0.0968796	0.667353
MICU1	0.0842781	-0.446092	0.443302	0.259508	-0.17523	-0.705599	0.183794	-0.53037	0.359024	0.889394	18.6441	2.45649	0.0972445	0.668394
IGLON5	0.546951	0.663185	0.182562	1.05854	-0.511591	-0.395357	-0.87598	0.116234	-0.364389	-0.480623	16.0282	2.45351	0.0975265	0.668394
EPHB3	1.37003	0.332321	0.509923	0.827483	0.542544	-0.495162	-0.31756	-1.03771	-0.860104	0.177602	17.8504	2.45124	0.0977425	0.668394
C11orf98	-0.296951	-0.105842	-0.249217	-0.261879	-0.0350726	0.156036	0.012662	0.191109	0.0477347	-0.143374	21.2247	2.45032	0.0978301	0.668394
KIAA1549	1.55985	0.823751	0.397163	0.0735856	1.48627	0.750165	0.323578	-0.736104	-1.16269	-0.426587	19.3364	2.46372	0.0982232	0.668394
PELP1	0.083522	-0.215461	-0.187818	-0.0909615	0.174483	-0.124499	-0.0968569	-0.298983	-0.27134	0.0276423	21.0475	2.44548	0.098292	0.668394
GATB	-0.810493	-0.360315	-0.654146	-0.527759	-0.282734	0.167444	-0.126387	0.450178	0.156347	-0.293831	19.1037	2.4442	0.0984146	0.668394
NOL9	0.374444	1.03941	1.72618	0.731472	-0.357028	0.307934	0.994711	0.664962	1.35174	0.686778	18.2529	2.44311	0.0985187	0.668394
DNAAF5	-0.336918	-0.147151	-0.311042	-0.411727	0.0748086	0.264576	0.100685	0.189767	0.0258765	-0.163891	19.8011	2.44227	0.0985994	0.668394
POLR1E	-0.47442	-0.450854	-0.371687	-0.593024	0.118604	0.14217	0.221337	0.0235663	0.102733	0.0791663	19.4671	2.4408	0.098741	0.668394
TPI1	0.187547	0.204774	0.213158	0.116629	0.0709176	0.088145	0.0965289	0.0172273	0.0256113	0.00838391	26.3499	2.43885	0.098929	0.668394
TTLL12	-0.233519	-0.139586	-0.322144	-0.37575	0.142232	0.236164	0.0536062	0.0939324	-0.0886255	-0.182558	20.8638	2.43868	0.0989449	0.668394
PHF3	0.0570928	0.245437	0.372364	0.228907	-0.171814	0.0165298	0.143456	0.188344	0.315271	0.126927	19.5724	2.43156	0.0996347	0.668394
TFRC	-0.0514449	-0.20427	-0.172659	-0.35408	0.302635	0.14981	0.181421	-0.152825	-0.121214	0.0316115	24.6505	2.43108	0.0996811	0.668394
PURB	-0.399026	-0.0344181	-0.184545	-1.70865	1.30962	1.67423	1.5241	0.364608	0.21448	-0.150127	16.6745	2.43108	0.0996813	0.668394
TRABD	-0.612641	-0.455605	-1.40427	-1.32659	0.713946	0.870982	-0.0776839	0.157036	-0.79163	-0.948666	17.6092	2.43094	0.0996949	0.668394
YRDC	-0.146327	-0.131934	-0.501466	-1.07707	0.930743	0.945136	0.575605	0.0143927	-0.355138	-0.369531	16.2745	2.43048	0.099739	0.668394
ATE1	0.222576	0.606036	0.532719	-0.138075	0.360651	0.744111	0.670794	0.38346	0.310143	-0.073317	18.5309	2.42996	0.0997895	0.668394
MRRF	0.04949	-0.179545	-0.339988	-0.225588	0.275078	0.0460423	-0.1144	-0.229035	-0.389478	-0.160442	20.1489	2.42993	0.0997929	0.668394
GULP1	1.48248	-1.71611	-3.01287	-1.9086	3.39108	0.192487	-1.10427	-3.19859	-4.49534	-1.29676	18.3014	2.46919	0.0998646	0.668394
MYEF2	0.132392	-0.028935	-0.209624	0.134138	-0.00174511	-0.163073	-0.343762	-0.161328	-0.342017	-0.180689	20.7915	2.42777	0.100003	0.668394
BRCC3	-0.00809453	0.0596843	0.177879	-0.236496	0.228402	0.296181	0.414375	0.0677788	0.185973	0.118195	20.0547	2.42752	0.100027	0.668394
TIMELESS	-1.70935	-1.34398	-1.59534	-1.46445	-0.244894	0.120469	-0.130892	0.365363	0.114002	-0.251361	17.7889	2.42685	0.100093	0.668394
NDUFC2	0.306261	-0.13877	0.260633	0.142865	0.163396	-0.281635	0.117768	-0.445031	-0.0456279	0.399403	20.7424	2.42663	0.100115	0.668394
CIC	-0.265511	-0.889982	-0.395227	0.963664	-1.22918	-1.85365	-1.35889	-0.624471	-0.129715	0.494755	17.3751	2.42628	0.100149	0.668394
SLC16A1	-0.212107	0.0764076	-0.0947493	-0.150538	-0.0615694	0.226945	0.0557886	0.288515	0.117358	-0.171157	22.3526	2.42478	0.100296	0.668394
MYO1B	-0.136357	0.100563	-0.0339718	-0.217742	0.081385	0.318305	0.18377	0.23692	0.102385	-0.134535	20.1337	2.42415	0.100357	0.668394
NGDN	-0.22926	-0.123731	-0.203971	-0.288825	0.0595651	0.165094	0.0848539	0.105529	0.0252888	-0.0802406	20.8869	2.42316	0.100454	0.668394
IFT74	4.5261e-05	0.72864	0.360534	0.271223	-0.271178	0.457417	0.0893106	0.728595	0.360488	-0.368106	19.0001	2.41929	0.100835	0.668394
ELAVL1	0.0914018	0.165279	0.264196	0.0574237	0.0339781	0.107855	0.206772	0.0738769	0.172794	0.098917	23.3854	2.41896	0.100867	0.668394
TAF6L	1.06157	1.33717	0.367001	0.993792	0.0677815	0.343378	-0.626791	0.275596	-0.694573	-0.970169	16.3736	2.41784	0.100978	0.668394
SIN3B	1.15207	-2.13154	-1.1879	-0.0149453	1.16701	-2.11659	-1.17295	-3.28361	-2.33997	0.943641	17.3765	2.42361	0.100985	0.668394
AARS1	-0.133934	0.0995201	-0.0156675	-0.151258	0.0173244	0.250779	0.135591	0.233454	0.118267	-0.115188	23.4938	2.41763	0.100999	0.668394
SLC29A1	-1.10526	-0.706637	0.0988997	-0.664795	-0.440462	-0.0418422	0.763695	0.398619	1.20416	0.805537	18.6593	2.41202	0.101553	0.671265
PCMT1	-0.104784	0.115695	0.0220445	0.0149254	-0.11971	0.10077	0.00711906	0.220479	0.126829	-0.0936505	22.4615	2.41071	0.101683	0.671326
CIAO2B	0.222777	-0.0914955	-0.162607	0.280673	-0.0578961	-0.372168	-0.44328	-0.314272	-0.385384	-0.0711117	20.8191	2.4086	0.101894	0.671642
SPTLC1	-0.489951	-0.431391	-0.621138	-0.498412	0.00846114	0.0670203	-0.122726	0.0585591	-0.131188	-0.189747	20.2783	2.40781	0.101973	0.671642
HIBCH	-0.18933	0.0666775	0.428965	0.129222	-0.318552	-0.0625445	0.299743	0.256008	0.618296	0.362288	19.3923	2.40246	0.102508	0.673536
EXOC2	-0.557982	-0.437178	-0.430402	-0.552629	-0.00535391	0.11545	0.122227	0.120804	0.127581	0.00677638	19.4926	2.39895	0.10286	0.673536
HINT1	0.303134	-0.0251735	-0.341797	0.128559	0.174574	-0.153733	-0.470356	-0.328307	-0.64493	-0.316623	23.1478	2.40427	0.102874	0.673536
DSP	1.80576	2.45565	-0.690039	1.52981	0.275952	0.925846	-2.21984	0.649893	-2.4958	-3.14569	17.5268	2.40571	0.103038	0.673536
GFPT1	-0.139686	0.105451	0.18641	-0.133049	-0.00663654	0.2385	0.31946	0.245137	0.326096	0.0809592	22.0301	2.39626	0.103131	0.673536
GLA	-0.727871	-0.198195	-0.101623	-0.00328863	-0.724583	-0.194907	-0.098334	0.529676	0.626249	0.0965728	18.2287	2.39562	0.103196	0.673536
RANBP10	0.0916306	-0.107108	0.884131	0.0929972	-0.00136668	-0.200105	0.791134	-0.198739	0.792501	0.991239	17.988	2.39544	0.103214	0.673536
CCDC124	0.262034	-0.0777504	-0.156476	0.0832629	0.178771	-0.161013	-0.239738	-0.339784	-0.418509	-0.0787251	21.9616	2.39529	0.103229	0.673536
MEAF6	-0.144311	0.145247	-0.437137	-0.14788	0.00356952	0.293127	-0.289257	0.289558	-0.292826	-0.582384	19.6589	2.39407	0.103352	0.673547
PPP4C	-0.197476	-0.116944	0.15518	0.00997961	-0.207456	-0.126924	0.1452	0.080532	0.352656	0.272124	21.038	2.39121	0.103643	0.673765
DSN1	-0.428688	-0.283822	0.94508	-0.14337	-0.285318	-0.140452	1.08845	0.144866	1.37377	1.2289	18.2696	2.39043	0.103722	0.673765
GTF2E1	-0.00182916	0.252767	0.465797	0.171825	-0.173654	0.0809416	0.293972	0.254596	0.467626	0.213031	19.2408	2.39016	0.103749	0.673765
VPS45	-0.370583	0.0482466	-0.308124	-0.405845	0.0352619	0.454092	0.0977212	0.41883	0.0624594	-0.35637	19.4122	2.38792	0.103977	0.674455
TNFAIP8	-0.454878	-0.94325	-0.889686	-1.33757	0.882689	0.394316	0.447881	-0.488372	-0.434808	0.0535645	17.5189	2.38579	0.104194	0.674811
IMPDH1	0.436891	0.233232	0.247246	0.0958709	0.34102	0.137361	0.151375	-0.203659	-0.189646	0.0140136	19.2234	2.38439	0.104338	0.674811
NRBP2	0.045547	0.148388	0.147597	1.35718	-1.31163	-1.20879	-1.20958	0.102841	0.10205	-0.000791112	18.3976	2.38382	0.104396	0.674811
HNRNPL	-0.0213314	0.0169821	0.252622	-0.0527637	0.0314322	0.0697457	0.305386	0.0383135	0.273954	0.23564	23.7578	2.38145	0.104639	0.675593
VIPAS39	-0.213287	-0.0199777	-0.564767	-0.112038	-0.101248	0.0920607	-0.452729	0.193309	-0.35148	-0.544789	19.983	2.37977	0.104812	0.675846
ARMC1	-0.316564	0.0109552	1.06237	-0.341298	0.0247332	0.352253	1.40367	0.32752	1.37894	1.05142	18.2363	2.37871	0.104921	0.675846
TRMT61A	-0.205327	-0.187935	-0.669731	-1.21865	1.01333	1.03072	0.548924	0.0173919	-0.464404	-0.481796	16.3595	2.37616	0.105184	0.676755
TRMT1	-0.178191	0.163531	-0.120413	-0.247796	0.069605	0.411326	0.127382	0.341721	0.0577774	-0.283944	19.9921	2.37408	0.105398	0.677025
NSMCE4A	-0.13834	0.24705	0.431932	-0.100897	-0.0374428	0.347947	0.532829	0.38539	0.570271	0.184882	19.2865	2.37187	0.105627	0.677025
CLIC4	0.0216492	0.0810314	0.247263	-0.021827	0.0434762	0.102858	0.26909	0.0593822	0.225613	0.166231	23.0634	2.37149	0.105667	0.677025
LSM2	0.0419052	0.302253	-0.123933	0.0515324	-0.00962725	0.250721	-0.175465	0.260348	-0.165838	-0.426186	19.7287	2.37023	0.105797	0.677025
MGMT	-0.117146	0.469777	-0.434159	-0.219742	0.102597	0.68952	-0.214416	0.586923	-0.317013	-0.903936	18.3976	2.36866	0.10596	0.677025
YY1	-0.117591	-0.11523	0.28712	0.0181006	-0.135692	-0.133331	0.269019	0.00236094	0.404711	0.40235	20.3772	2.36637	0.106199	0.677025
MRPS9	0.308877	0.0133679	0.0399763	-0.0414907	0.350368	0.0548586	0.081467	-0.295509	-0.268901	0.0266084	19.8838	2.36601	0.106237	0.677025
RTN4IP1	-0.929635	-0.906647	0.0956574	-1.23313	0.303492	0.32648	1.32878	0.022988	1.02529	1.0023	16.6769	2.36556	0.106284	0.677025
YPEL5	0.6917	0.873896	1.38389	-0.118023	0.809722	0.991918	1.50192	0.182196	0.692193	0.509997	16.5843	2.3652	0.106322	0.677025
RFTN1	0.0234421	0.432861	0.307885	-0.022772	0.0462141	0.455633	0.330657	0.409419	0.284443	-0.124975	18.9948	2.36237	0.106617	0.677722
GNL3	-0.53617	-0.517623	-0.41819	-0.446055	-0.0901148	-0.0715686	0.0278649	0.0185462	0.11798	0.0994335	20.0456	2.36182	0.106675	0.677722
SLC12A7	-0.416422	-0.0732727	0.216456	-0.246165	-0.170257	0.172892	0.46262	0.343149	0.632878	0.289728	19.7369	2.35589	0.1073	0.680911
WBP1L	0.585184	0.676068	1.70515	1.05653	-0.471344	-0.38046	0.648627	0.0908841	1.11997	1.02909	16.7181	2.3489	0.108039	0.684824
NFU1	0.00704729	-0.0871656	-0.361219	0.001	0.00604728	-0.0881656	-0.362219	-0.0942128	-0.368266	-0.274053	21.1504	2.3464	0.108305	0.685729
MTHFD2	-0.396138	-0.092366	-0.387455	-0.352295	-0.0438421	0.259929	-0.0351599	0.303772	0.00868216	-0.295089	23.2121	2.34321	0.108647	0.686437
ZSCAN18	0.239387	0.243131	1.03288	1.80182	-1.56243	-1.55869	-0.768944	0.00374329	0.793488	0.789745	16.5307	2.34231	0.108743	0.686437
RIOX1	-0.349538	0.0447733	-0.196206	-0.128196	-0.221341	0.17297	-0.0680099	0.394311	0.153331	-0.24098	19.5818	2.34103	0.10888	0.686437
KARS1	-0.124777	0.00848192	-0.0378332	-0.202277	0.0774997	0.210759	0.164444	0.133259	0.0869441	-0.0463152	22.0872	2.34074	0.108911	0.686437
NDUFA8	0.565479	0.0893101	0.0874935	0.358222	0.207257	-0.268912	-0.270729	-0.476169	-0.477985	-0.0018166	22.32	2.34037	0.109168	0.687126
SMU1	0.0387338	0.167352	0.707628	0.113185	-0.0744515	0.0541663	0.594442	0.128618	0.668894	0.540276	21.215	2.34259	0.109268	0.687126
PCDH7	0.436501	0.624657	-0.0296679	1.43729	-1.00079	-0.812629	-1.46695	0.188157	-0.466168	-0.654325	17.1033	2.336	0.109421	0.687313
OSBPL5	0.761766	0.407028	0.820105	0.252608	0.509158	0.15442	0.567497	-0.354738	0.0583385	0.413077	17.5548	2.33337	0.109705	0.687325
SSU72	0.261009	0.146472	0.685116	0.291179	-0.0301704	-0.144707	0.393937	-0.114537	0.424107	0.538644	18.6301	2.33086	0.109977	0.687325
SIRPA	0.876848	-0.450452	-0.216368	0.181811	0.695037	-0.632263	-0.398179	-1.3273	-1.09322	0.234085	19.3642	2.33426	0.110165	0.687325
OSBPL8	0.041762	-0.335243	0.07053	-0.283787	0.325549	-0.0514565	0.354317	-0.377005	0.0287679	0.405773	19.7898	2.32907	0.110171	0.687325
RTCA	-0.837088	-0.178827	-0.877193	-0.747627	-0.089461	0.568801	-0.129566	0.658262	-0.0401046	-0.698366	18.0123	2.32844	0.11024	0.687325
BAP1	0.183623	-0.447297	0.242849	0.195913	-0.0122903	-0.64321	0.0469359	-0.63092	0.0592262	0.690146	18.2734	2.32763	0.110328	0.687325
PON2	0.306236	-0.0314193	0.330229	0.235971	0.0702647	-0.26739	0.0942584	-0.337655	0.0239937	0.361649	21.9762	2.32751	0.110342	0.687325
SNF8	-0.171133	0.158838	0.350235	0.0293461	-0.200479	0.129491	0.320889	0.32997	0.521368	0.191398	20.0479	2.32686	0.110412	0.687325
GPAT3	0.488006	1.63913	1.63326	0.395974	0.0920328	1.24316	1.23728	1.15113	1.14525	-0.00587855	17.3158	2.32547	0.110564	0.687421
C1orf122	0.852913	-0.896346	-0.238744	0.260821	0.592091	-1.15717	-0.499565	-1.74926	-1.09166	0.657602	17.6028	2.32369	0.110758	0.687421
STK24	-0.0199653	0.0054488	-0.0782565	0.251357	-0.271323	-0.245909	-0.329614	0.0254141	-0.0582911	-0.0837053	20.4002	2.32102	0.11105	0.687421
PLPP3	1.04907	-0.246768	-0.194105	0.275608	0.773462	-0.522376	-0.469714	-1.29584	-1.24318	0.0526626	17.5516	2.31964	0.111202	0.687421
AKAP10	0.0410952	-1.42966	-1.08525	-1.34731	1.38841	-0.0823445	0.262067	-1.47075	-1.12634	0.344411	17.1697	2.31948	0.111219	0.687421
AMPD2	-0.253205	-0.157149	-0.273071	-0.198414	-0.0547914	0.0412653	-0.0746569	0.0960567	-0.0198654	-0.115922	22.247	2.31888	0.111285	0.687421
OSMR	1.12622	0.207847	1.39173	1.3844	-0.258177	-1.17655	0.00733295	-0.918373	0.26551	1.18388	16.8456	2.31881	0.111293	0.687421
PGAM1	0.218792	0.0274228	0.0508893	0.129644	0.0891474	-0.102221	-0.0787549	-0.191369	-0.167902	0.0234664	23.3521	2.31666	0.11153	0.687712
NPLOC4	-0.082002	-0.00326714	0.190663	0.00904461	-0.0910467	-0.0123118	0.181618	0.0787349	0.272665	0.19393	20.7766	2.31613	0.111588	0.687712
THBS1	0.783375	0.0802306	0.882911	0.215879	0.567496	-0.135648	0.667032	-0.703144	0.0995359	0.80268	21.8741	2.33844	0.111923	0.688652
OSBPL6	-0.524818	0.350592	0.309171	-0.564928	0.0401101	0.91552	0.8741	0.87541	0.833989	-0.0414208	16.6163	2.31145	0.112106	0.688652
OGT	0.0990148	-0.0174967	0.228695	0.0151861	0.0838286	-0.0326828	0.213509	-0.116511	0.12968	0.246192	21.5719	2.31139	0.112112	0.688652
FYCO1	-0.0163114	0.156536	0.317891	0.316031	-0.332343	-0.159495	0.00186012	0.172848	0.334203	0.161355	19.0041	2.30892	0.112386	0.688663
HSPBP1	-0.496171	-0.188464	-0.0163454	-0.365989	-0.130182	0.177524	0.349643	0.307707	0.479825	0.172119	20.4725	2.30826	0.11246	0.688663
DERA	-0.303151	0.163189	0.267084	-0.0974516	-0.2057	0.260641	0.364536	0.466341	0.570236	0.103895	19.7807	2.30803	0.112485	0.688663
RPSA	0.0100428	0.0553107	-0.18429	-0.190674	0.200717	0.245985	0.00638412	0.0452679	-0.194333	-0.239601	24.7165	2.30612	0.112697	0.689201
NPTN	-0.43043	-0.585102	0.150093	-0.428175	-0.00225471	-0.156927	0.578268	-0.154672	0.580523	0.735195	19.9672	2.29584	0.113849	0.695066
CAMK4	-0.126579	0.154315	0.592325	0.184978	-0.311557	-0.0306633	0.407346	0.280893	0.718903	0.43801	18.0457	2.29395	0.114064	0.695066
DEK	0.0584471	-0.242826	-0.19509	0.0247739	0.0336732	-0.2676	-0.219864	-0.301273	-0.253537	0.0477357	22.5135	2.29249	0.114228	0.695066
NADK2	-0.399764	0.169494	1.06047	0.199366	-0.59913	-0.0298718	0.861107	0.569258	1.46024	0.890979	17.4099	2.29236	0.114243	0.695066
ADRM1	0.67512	0.181859	0.210994	0.0897907	0.58533	0.0920684	0.121203	-0.493261	-0.464127	0.0291347	20.5046	2.29202	0.114281	0.695066
PDIA3	0.149029	0.0647129	0.160052	0.160071	-0.0110417	-0.0953578	-1.83666e-05	-0.0843161	0.0110233	0.0953395	25.6237	2.28961	0.114554	0.695493
HMGN1	-1.61264	-0.665745	-0.991774	-2.61032	0.997673	1.94457	1.61854	0.946898	0.620869	-0.32603	17.0792	2.28919	0.114602	0.695493
RGS10	-0.179868	-0.506811	-1.32194	-1.24569	1.06582	0.738882	-0.0762439	-0.326943	-1.14207	-0.815125	16.538	2.28791	0.114748	0.695539
KHSRP	0.181081	0.038949	-0.0118234	0.108622	0.0724593	-0.0696726	-0.120445	-0.142132	-0.192904	-0.0507724	23.7057	2.28479	0.115103	0.695539
SMAP1	0.0489873	-0.187212	-0.206336	0.181854	-0.132867	-0.369066	-0.38819	-0.236199	-0.255324	-0.0191244	20.3987	2.2845	0.115136	0.695539
PPAT	-0.387628	-0.0897404	-0.438864	-0.0358811	-0.351747	-0.0538593	-0.402983	0.297887	-0.0512368	-0.349124	20.822	2.28354	0.115246	0.695539
RPS6	-0.0759972	0.142367	0.00744043	-0.0518054	-0.0241918	0.194172	0.0592458	0.218364	0.0834376	-0.134926	25.3127	2.28307	0.115299	0.695539
UBA3	-0.362306	0.0601898	-0.168063	-0.314593	-0.0477126	0.374783	0.14653	0.422496	0.194243	-0.228253	20.4237	2.28161	0.115466	0.695539
NKAPD1	0.188479	1.0476	0.122005	-0.14775	0.336229	1.19535	0.269754	0.85912	-0.0664741	-0.925594	17.8948	2.28089	0.115549	0.695539
DDX56	-0.146777	-0.070588	-0.206277	-0.289204	0.142426	0.218616	0.0829266	0.0761893	-0.0594997	-0.135689	20.3199	2.27817	0.115861	0.695539
MLLT1	0.265937	-0.00214771	0.957931	0.46215	-0.196213	-0.464298	0.49578	-0.268085	0.691994	0.960078	18.8102	2.27755	0.115933	0.695539
TGFBR2	1.81755	0.259535	1.15829	1.36262	0.454931	-1.10308	-0.204334	-1.55802	-0.659264	0.898751	17.2527	2.27752	0.115936	0.695539
MARCKSL1	-0.145363	-0.230024	0.336607	0.282973	-0.428336	-0.512997	0.0536342	-0.0846612	0.48197	0.566632	22.0051	2.28129	0.116064	0.695539
SPAG5	-0.597304	0.574366	0.410147	0.378443	-0.975746	0.195923	0.0317042	1.17167	1.00745	-0.164219	16.6157	2.276	0.116111	0.695539
SLC5A6	-0.868175	-0.643739	0.300642	-1.80023	0.932059	1.15649	2.10088	0.224436	1.16882	0.944381	17.0583	2.27473	0.116257	0.695666
TASOR2	1.59957	2.34947	-0.0284843	-0.0130169	1.61259	2.36248	-0.0154675	0.749894	-1.62806	-2.37795	18.691	2.29959	0.116762	0.696255
PPAN	-0.0821579	-0.23017	-0.258732	-0.231536	0.149378	0.00136587	-0.0271957	-0.148012	-0.176574	-0.0285616	19.8335	2.27012	0.116791	0.696255
MYADM	-0.0520007	0.425873	0.452737	-0.521696	0.469695	0.947568	0.974433	0.477873	0.504738	0.0268648	17.8734	2.26968	0.116841	0.696255
TRIM56	0.00501443	0.28777	0.0681965	0.0490398	-0.0440254	0.23873	0.0191567	0.282756	0.0631821	-0.219574	19.5232	2.26955	0.116857	0.696255
RPL37	-0.228657	-0.357974	-3.04548	-2.62216	2.3935	2.26418	-0.423322	-0.129317	-2.81682	-2.68751	18.2213	2.29466	0.117447	0.698141
VPS26B	0.408006	0.527433	-0.0643386	0.544281	-0.136275	-0.0168475	-0.60862	0.119428	-0.472344	-0.591772	17.4993	2.26387	0.117518	0.698141
PPP2R2A	-0.301053	-0.131608	-0.0439198	-0.304448	0.00339495	0.17284	0.260528	0.169445	0.257133	0.0876884	19.9545	2.2636	0.11755	0.698141
TJAP1	-0.0146025	-0.551391	-0.675662	-0.392926	0.378324	-0.158465	-0.282736	-0.536789	-0.66106	-0.124271	18.6011	2.26169	0.117773	0.698719
RUVBL1	-0.119253	0.0767617	0.0112994	-0.105954	-0.0132995	0.182715	0.117253	0.196015	0.130553	-0.0654623	22.9821	2.25967	0.11801	0.699065
NIF3L1	-0.0873395	0.00863837	0.661092	0.142542	-0.229881	-0.133903	0.518551	0.0959778	0.748432	0.652454	20.4909	2.26017	0.118083	0.699065
HNRNPA2B1	0.0313287	0.178773	0.160961	-0.0305533	0.0618819	0.209326	0.191514	0.147444	0.129632	-0.0178121	26.9128	2.25527	0.118527	0.700243
IMP4	0.395388	-0.0298197	0.0648828	-0.293453	0.688841	0.263633	0.358336	-0.425208	-0.330505	0.0947025	20.7058	2.25418	0.118655	0.700243
NIT2	-0.22352	0.222302	0.335283	-0.239919	0.0163986	0.462221	0.575202	0.445822	0.558803	0.112981	20.7324	2.25333	0.118756	0.700243
FAM50A	0.0839097	0.204248	0.290535	0.179622	-0.0957121	0.0246263	0.110913	0.120338	0.206626	0.0862871	21.0928	2.25294	0.118802	0.700243
PES1	-0.0945131	-0.0529935	-0.109268	-0.273942	0.179429	0.220948	0.164674	0.0415195	-0.0147548	-0.0562743	21.6415	2.25201	0.118912	0.700243
RPS6KB2	0.30665	-0.196563	-0.29372	-0.756417	1.06307	0.559854	0.462697	-0.503213	-0.60037	-0.0971569	16.8676	2.25017	0.11913	0.700786
CHTF18	0.151147	0.332331	0.451346	0.0772352	0.0739121	0.255096	0.374111	0.181184	0.300199	0.119016	19.4846	2.24432	0.119826	0.70378
UNG	-0.354982	-0.14876	-0.741427	0.157092	-0.512074	-0.305851	-0.898519	0.206223	-0.386444	-0.592667	18.2223	2.24376	0.119892	0.70378
HSP90B1	0.0443091	0.0536415	0.154038	0.0325471	0.011762	0.0210944	0.12149	0.00933244	0.109728	0.100396	24.5497	2.24048	0.120284	0.704614
SPTBN5	0.961176	0.617797	0.341273	-0.19029	1.15147	0.808087	0.531563	-0.343378	-0.619903	-0.276524	17.1799	2.23845	0.120528	0.704614
PHACTR4	0.183491	-0.173188	-0.209394	-0.0939249	0.277416	-0.079263	-0.115469	-0.356679	-0.392885	-0.0362056	19.5395	2.23802	0.120579	0.704614
RTN4	0.0761823	-0.343008	-0.285152	-0.367798	0.44398	0.0247904	0.0826457	-0.41919	-0.361335	0.0578553	24.3573	2.24231	0.12063	0.704614
TATDN1	-0.169177	0.156673	0.0657598	-0.0488416	-0.120335	0.205515	0.114601	0.32585	0.234936	-0.0909135	21.4069	2.23667	0.120742	0.704614
PLEKHO2	-0.0119744	0.0112302	-0.169956	0.318665	-0.33064	-0.307435	-0.488621	0.0232045	-0.157981	-0.181186	19.2831	2.23455	0.120997	0.704614
YEATS4	0.717092	0.933427	1.87892	1.69244	-0.975349	-0.759014	0.186477	0.216335	1.16183	0.945491	16.8034	2.23447	0.121007	0.704614
MYBBP1A	-0.184573	0.0566535	0.0815636	-0.0809565	-0.103617	0.13761	0.16252	0.241226	0.266137	0.0249101	20.2298	2.23373	0.121096	0.704614
HSP90AA1	-0.120247	0.0139851	0.0880382	-0.132532	0.0122856	0.146518	0.220571	0.134232	0.208285	0.0740531	24.9409	2.23227	0.121273	0.704614
EIF2B1	-0.398198	-0.0634163	0.0679794	-0.527794	0.129596	0.464378	0.595774	0.334782	0.466178	0.131396	19.6921	2.23	0.121548	0.704614
LIN7C	0.0849955	-0.0245533	-0.233958	0.0621306	0.0228649	-0.0866838	-0.296089	-0.109549	-0.318954	-0.209405	20.5447	2.22962	0.121594	0.704614
FHL3	0.133161	-0.294118	-0.0831792	0.222926	-0.0897648	-0.517044	-0.306105	-0.427279	-0.21634	0.210939	20.919	2.22906	0.121662	0.704614
STX6	0.247244	-0.502697	-0.162557	0.0681592	0.179084	-0.570856	-0.230717	-0.74994	-0.409801	0.340139	19.0185	2.22852	0.121728	0.704614
EMG1	-0.448244	-0.316685	-0.048656	-0.327145	-0.121099	0.0104594	0.278489	0.131558	0.399588	0.26803	20.9179	2.22745	0.121858	0.704614
STARD3NL	-1.4872	-1.75758	-2.35057	-2.06477	0.577567	0.307188	-0.285804	-0.270379	-0.86337	-0.592992	18.6441	2.2441	0.122004	0.704614
FSTL1	0.253407	-0.447715	-0.391158	0.158377	0.0950299	-0.606092	-0.549535	-0.701122	-0.644565	0.0565568	19.0792	2.22577	0.122062	0.704614
GNA13	-0.0343183	0.2888	0.047264	0.0118655	-0.0461838	0.276935	0.0353985	0.323119	0.0815823	-0.241536	20.4277	2.22324	0.12237	0.704674
TMEM168	0.751999	0.207831	1.19004	1.12521	-0.373215	-0.917382	0.0648248	-0.544167	0.438039	0.982207	16.6975	2.22042	0.122715	0.704674
HYOU1	-0.041401	0.0611333	0.147818	-0.0249827	-0.0164183	0.086116	0.172801	0.102534	0.189219	0.0866848	23.4025	2.22034	0.122725	0.704674
DPYSL2	0.133472	0.0570125	0.0994558	0.229156	-0.0956833	-0.172143	-0.1297	-0.0764598	-0.0340165	0.0424433	23.1674	2.21995	0.122773	0.704674
LTBP2	0.216374	-0.0535578	0.712697	0.0134891	0.202885	-0.0670469	0.699208	-0.269932	0.496323	0.766255	17.5905	2.2196	0.122816	0.704674
PPIH	-0.225755	-0.106306	-0.178097	-0.218807	-0.00694871	0.1125	0.0407098	0.119449	0.0476585	-0.0717903	21.7264	2.21922	0.122862	0.704674
SLC7A6OS	-0.154964	0.00605372	0.0133188	0.847034	-1.002	-0.84098	-0.833715	0.161017	0.168283	0.00726505	18.5905	2.21842	0.12296	0.704674
ATP7A	0.324616	0.720477	1.18506	0.606879	-0.282263	0.113598	0.578178	0.395861	0.860441	0.46458	16.3844	2.21568	0.123298	0.705673
FTSJ3	-0.120002	0.051173	-0.085305	-0.166551	0.0465486	0.217724	0.0812456	0.171175	0.034697	-0.136478	21.9604	2.21394	0.123512	0.705673
SLC25A24	-0.116043	-0.315041	-0.0260659	0.00612139	-0.122164	-0.321163	-0.0321873	-0.198998	0.0899769	0.288975	21.481	2.213	0.123628	0.705673
CLTA	0.398548	0.0516003	0.165838	0.34383	0.0547188	-0.292229	-0.177992	-0.346948	-0.232711	0.114238	24.1954	2.21289	0.123642	0.705673
NECAP2	0.393725	0.0223175	0.0382523	0.254321	0.139405	-0.232003	-0.216068	-0.371408	-0.355473	0.0159348	19.2205	2.21158	0.123803	0.705869
PEX19	-0.519956	0.0252507	-0.289341	-0.194228	-0.325727	0.219479	-0.0951121	0.545206	0.230615	-0.314591	19.9114	2.20969	0.124038	0.706481
RAD50	-0.191444	-0.00463366	-0.116153	-0.102344	-0.0891	0.0977099	-0.0138096	0.18681	0.0752905	-0.11152	21.2035	2.20732	0.124331	0.707429
P4HB	0.138239	0.0658052	0.109271	0.122468	0.0157715	-0.0566625	-0.0131967	-0.072434	-0.0289683	0.0434658	25.3365	2.20466	0.124663	0.708589
PNKD	0.344759	0.0922185	0.393737	0.288203	0.0565557	-0.195985	0.105534	-0.25254	0.0489778	0.301518	20.6027	2.20237	0.124948	0.70868
INTS13	-0.0800852	0.149492	0.218118	-0.0194293	-0.0606559	0.168921	0.237547	0.229577	0.298203	0.0686258	19.94	2.20167	0.125036	0.70868
CSRP1	0.23853	0.226727	0.15028	0.0345991	0.203931	0.192128	0.115681	-0.0118036	-0.0882502	-0.0764466	23.0667	2.20147	0.125061	0.70868
SLC44A2	-0.0104396	0.310107	1.60705	0.0539195	-0.0643591	0.256187	1.55313	0.320546	1.61749	1.29694	19.5558	2.22215	0.125754	0.711015
ZNF148	0.472955	0.221699	0.349749	0.215995	0.25696	0.00570459	0.133754	-0.251255	-0.123206	0.12805	18.9731	2.1947	0.125911	0.711015
ABCB10	-0.783361	-0.278879	-0.823436	-0.103797	-0.679564	-0.175082	-0.719639	0.504482	-0.0400757	-0.544557	17.8465	2.19347	0.126066	0.711015
LSM14A	-0.245249	-0.390751	-0.471431	-0.0964139	-0.148835	-0.294337	-0.375017	-0.145502	-0.226182	-0.0806801	19.7536	2.19292	0.126135	0.711015
RAB33B	-0.121478	0.291421	0.879477	-0.0504331	-0.0710454	0.341854	0.92991	0.4129	1.00096	0.588055	18.4215	2.19273	0.12616	0.711015
CRACR2A	-0.937708	-0.322551	0.585128	-0.193195	-0.744514	-0.129357	0.778322	0.615157	1.52284	0.907679	16.7073	2.19111	0.126365	0.711015
VARS2	-0.20032	-0.125576	-0.480648	-0.0691428	-0.131178	-0.0564333	-0.411505	0.0747442	-0.280328	-0.355072	20.2638	2.19064	0.126424	0.711015
N4BP2	-0.621142	-0.132668	-0.366682	-1.45109	0.829945	1.31842	1.08441	0.488474	0.25446	-0.234014	16.8439	2.18954	0.126563	0.711015
NOL10	-0.0166784	-0.147459	-0.16292	-0.295327	0.278648	0.147868	0.132407	-0.130781	-0.146241	-0.0154609	20.7749	2.18906	0.126624	0.711015
CDC34	0.910853	-0.855464	0.033321	0.651638	0.259216	-1.5071	-0.618317	-1.76632	-0.877532	0.888785	16.7427	2.18663	0.126933	0.711625
CAV1	0.449032	0.0690354	0.0894062	0.0526856	0.396347	0.0163498	0.0367206	-0.379997	-0.359626	0.0203708	22.0232	2.18546	0.127082	0.711625
EXOG	0.554447	0.313918	1.57712	0.251845	0.302602	0.0620731	1.32528	-0.240529	1.02268	1.26321	18.8402	2.18966	0.127117	0.711625
EPHB2	0.0356183	-0.374742	-0.476029	-0.0663272	0.101945	-0.308415	-0.409702	-0.41036	-0.511647	-0.101287	18.2771	2.18113	0.127635	0.711882
HMG20A	0.322891	2.17883	0.35581	0.0879032	0.234988	2.09092	0.267907	1.85594	0.0329194	-1.82302	19.9806	2.22322	0.12785	0.711882
EMB	-0.32465	0.119033	-0.472449	-1.20671	0.882056	1.32574	0.734257	0.443683	-0.147799	-0.591482	16.2801	2.17936	0.127862	0.711882
KIFAP3	0.111974	0.179109	1.09209	-0.432326	0.5443	0.611435	1.52441	0.0671348	0.980112	0.912977	17.1693	2.17877	0.127937	0.711882
WDR19	0.231527	0.930929	0.320643	0.633252	-0.401724	0.297677	-0.312609	0.699401	0.0891156	-0.610286	17.1362	2.17705	0.128158	0.711882
A2M	-0.14026	-0.0291	0.206075	0.0564903	-0.196751	-0.0855903	0.149584	0.11116	0.346335	0.235175	25.4086	2.17691	0.128175	0.711882
PTPN21	1.18875	0.472205	1.30258	1.35815	-0.169397	-0.885944	-0.0555683	-0.716547	0.113829	0.830375	16.4436	2.17623	0.128263	0.711882
VAMP4	0.117572	1.26882	0.147193	0.181799	-0.0642271	1.08702	-0.0346057	1.15125	0.0296214	-1.12163	16.3798	2.17461	0.128471	0.711882
NKTR	-2.5035	-2.52717	-2.63648	3.00321	-5.50672	-5.53039	-5.63969	-0.023671	-0.132978	-0.109307	22.4032	2.25911	0.128626	0.711882
ERMP1	-0.0085819	0.19313	0.507585	-0.428808	0.420226	0.621938	0.936393	0.201712	0.516167	0.314455	19.0755	2.17331	0.128639	0.711882
ARFGEF1	0.135091	0.289317	-1.16848	-1.84155	1.97664	2.13086	0.673065	0.154226	-1.30357	-1.4578	17.1575	2.17291	0.128691	0.711882
MT-ND4	1.35476	0.846304	-0.626339	-0.764083	2.11884	1.61039	0.137744	-0.508456	-1.9811	-1.47264	18.0479	2.17727	0.1287	0.711882
STAT6	0.252189	-0.743775	-1.35942	-1.33844	1.59062	0.594661	-0.0209878	-0.995964	-1.61161	-0.615649	17.2584	2.1696	0.129119	0.713491
PEBP1	0.154262	0.169491	0.254997	0.141864	0.0123977	0.0276272	0.113133	0.0152295	0.100735	0.0855056	23.4805	2.16658	0.129512	0.71495
COMMD7	1.23869	0.509291	0.941433	-0.356419	1.59511	0.865711	1.29785	-0.729395	-0.297253	0.432141	17.179	2.16447	0.129786	0.715753
CDCA3	-0.00869147	-0.388864	-0.574358	0.00960344	-0.0182949	-0.398467	-0.583962	-0.380172	-0.565667	-0.185495	18.5805	2.16321	0.129951	0.715856
C17orf80	0.0440502	0.670733	0.681778	0.501633	-0.457583	0.1691	0.180145	0.626683	0.637728	0.0110456	19.1034	2.16236	0.130062	0.715856
ALCAM	0.222206	-0.0777622	0.196935	0.0969178	0.125288	-0.17468	0.100017	-0.299968	-0.0252714	0.274697	22.1064	2.15966	0.130415	0.716097
CLP1	0.395563	0.347012	1.74554	0.412228	-0.0166645	-0.0652158	1.33331	-0.0485514	1.34997	1.39853	17.7181	2.15945	0.130443	0.716097
SOD1	-0.265794	0.141201	-0.126814	0.0506397	-0.316433	0.0905616	-0.177454	0.406995	0.13898	-0.268015	23.9759	2.15907	0.130492	0.716097
ENDOD1	0.152981	0.430851	0.448633	0.0429939	0.109987	0.387857	0.405639	0.27787	0.295652	0.0177819	19.4652	2.15513	0.13101	0.718227
PABPN1	0.0259282	-0.0536652	-0.16691	0.0484405	-0.0225123	-0.102106	-0.215351	-0.0795935	-0.192839	-0.113245	22.1363	2.15277	0.131321	0.719225
TAGLN	-0.0106017	-0.00311149	0.219794	-0.320493	0.309891	0.317381	0.540287	0.00749021	0.230396	0.222906	21.6684	2.14977	0.131717	0.720686
FAM98B	-0.163427	0.136803	0.0696846	0.0226597	-0.186086	0.114143	0.0470249	0.300229	0.233111	-0.067118	21.6255	2.14794	0.131961	0.72081
PRR36	-1.4935	-1.18931	-0.66571	-1.38646	-0.107048	0.197145	0.720745	0.304193	0.827793	0.5236	17.5016	2.14765	0.131999	0.72081
DUT	-0.0913962	0.0351467	-0.211578	-0.0716432	-0.019753	0.10679	-0.139935	0.126543	-0.120182	-0.246725	22.7301	2.14447	0.132422	0.722406
FOXJ3	-1.26621	-1.12684	-1.07674	-0.58683	-0.679383	-0.540011	-0.489908	0.139372	0.189474	0.0501021	16.1728	2.14305	0.132612	0.722581
SUN2	-0.15149	-0.437786	-0.403325	-0.422924	0.271434	-0.0148623	0.0195988	-0.286296	-0.251835	0.034461	19.3531	2.14229	0.132714	0.722581
SIRT5	-1.35847	-0.537643	-0.0856148	-0.587534	-0.770933	0.0498907	0.501919	0.820823	1.27285	0.452028	16.7147	2.14121	0.132857	0.722656
STMN2	4.02688	2.28539	0.541176	0.103624	3.92326	2.18177	0.437551	-1.74149	-3.48571	-1.74422	20.4146	2.22245	0.133072	0.722799
TSPAN9	0.849407	0.0800085	0.835384	0.427217	0.422191	-0.347208	0.408168	-0.769399	-0.0140232	0.755376	18.6467	2.1382	0.13326	0.722799
DDI2	-0.484213	-0.232212	-0.443413	-0.469652	-0.0145604	0.23744	0.0262392	0.252	0.0407996	-0.211201	19.2733	2.13733	0.133377	0.722799
ARL4C	0.600813	1.25841	0.539838	0.380296	0.220517	0.878116	0.159542	0.657599	-0.060975	-0.718574	15.8329	2.13623	0.133525	0.722799
FARSB	-0.0775739	0.0150756	-0.111633	-0.195886	0.118312	0.210961	0.0842531	0.0926495	-0.0340587	-0.126708	21.2932	2.13324	0.133928	0.722799
ALKBH5	0.983939	-0.139968	-0.529885	-0.0392203	1.02316	-0.100748	-0.490664	-1.12391	-1.51382	-0.389917	18.5571	2.13321	0.133933	0.722799
UQCRQ	1.94376	-0.113967	1.93123	-0.0712192	2.01498	-0.0427478	2.00245	-2.05773	-0.0125293	2.0452	19.55	2.17857	0.133983	0.722799
H3-2	0.0474312	0.15607	0.557208	0.015084	0.0323472	0.140986	0.542124	0.108639	0.509776	0.401138	23.4211	2.13652	0.134059	0.722799
NAF1	-0.456734	-0.477317	0.868743	0.0230341	-0.479768	-0.500352	0.845709	-0.0205839	1.32548	1.34606	16.4515	2.13065	0.134278	0.722799
JAK1	0.715705	0.431231	0.727492	0.633218	0.082487	-0.201987	0.0942738	-0.284474	0.0117868	0.296261	18.0128	2.13023	0.134336	0.722799
SGTB	-0.434934	0.137858	0.0648934	-0.18188	-0.253054	0.319738	0.246774	0.572792	0.499827	-0.0729646	20.4583	2.1296	0.134421	0.722799
GIPC1	0.0790265	-0.14842	0.0675802	0.0406692	0.0383573	-0.189089	0.026911	-0.227446	-0.0114463	0.216	20.5018	2.12895	0.134509	0.722799
COX19	1.19761	0.0898963	1.07826	0.164562	1.03305	-0.0746653	0.913694	-1.10772	-0.119358	0.988359	17.5913	2.12847	0.134574	0.722799
NOA1	-0.28568	-0.184825	-0.379453	-0.0461092	-0.239571	-0.138716	-0.333344	0.100855	-0.0937722	-0.194627	19.899	2.12606	0.134902	0.723859
SUN1	0.00357499	0.25642	0.307467	0.00453395	-0.000958962	0.251886	0.302933	0.252845	0.303892	0.0510466	20.212	2.12407	0.135172	0.724203
PRCP	-0.326278	-0.382192	-0.511051	-0.315314	-0.0109632	-0.0668778	-0.195737	-0.0559146	-0.184774	-0.128859	20.9386	2.12361	0.135235	0.724203
WIPI2	0.767715	0.196762	0.724623	0.275802	0.491913	-0.0790398	0.448821	-0.570953	-0.0430917	0.527861	19.0454	2.12231	0.135412	0.724203
KIF14	0.419156	-0.0461511	0.609908	-0.112645	0.531801	0.0664937	0.722553	-0.465307	0.190751	0.656059	17.8277	2.12176	0.135487	0.724203
TTL	1.07242	-0.553431	1.09067	-0.710619	1.78304	0.157188	1.80129	-1.62585	0.018248	1.6441	17.417	2.12003	0.135724	0.724592
LRRC47	-0.232335	-0.0420266	-0.130255	-0.185478	-0.0468573	0.143451	0.0552223	0.190308	0.10208	-0.0882287	20.8586	2.11838	0.13595	0.724592
TUBB	0.0285213	0.134987	0.196214	0.0425536	-0.0140324	0.0924334	0.15366	0.106466	0.167692	0.0612266	26.6142	2.11789	0.136017	0.724592
BCL2L13	-0.250182	-0.477115	0.115048	0.148943	-0.399124	-0.626057	-0.0338948	-0.226933	0.36523	0.592163	19.174	2.11483	0.136439	0.724592
PHF6	-0.294332	1.45888	0.207429	-0.249985	-0.0443475	1.70887	0.457415	1.75322	0.501762	-1.25145	19.1849	2.1305	0.136648	0.724592
HEATR3	1.21216	0.776193	0.949489	-0.00663809	1.2188	0.782831	0.956127	-0.435967	-0.262671	0.173296	16.9777	2.11129	0.136927	0.724592
NUDT11	-0.94164	-0.466871	-0.328914	-0.748815	-0.192825	0.281945	0.419901	0.474769	0.612726	0.137957	18.3014	2.10887	0.137262	0.724592
CCDC180	-0.0940585	-0.487208	-0.101184	-0.558214	0.464156	0.0710068	0.457031	-0.393149	-0.00712515	0.386024	18.3913	2.10767	0.137429	0.724592
TAB2	-0.225742	0.23418	-0.567138	-0.00469299	-0.221049	0.238873	-0.562445	0.459922	-0.341395	-0.801317	18.2187	2.10728	0.137483	0.724592
PGLS	0.0455264	0.0219903	-0.209422	0.0910192	-0.0454929	-0.0690289	-0.300441	-0.023536	-0.254948	-0.231412	21.2632	2.1051	0.137785	0.724592
TIMM17B	0.0918304	0.325681	0.53216	0.00121916	0.0906112	0.324461	0.530941	0.23385	0.44033	0.206479	20.041	2.10376	0.137972	0.724592
RRP15	-0.25178	-0.408014	-0.678514	-0.0433954	-0.208385	-0.364619	-0.635118	-0.156234	-0.426734	-0.270499	18.6044	2.10363	0.137991	0.724592
EGLN1	0.904637	0.0967689	0.179825	0.582356	0.322281	-0.485588	-0.402531	-0.807868	-0.724812	0.0830561	18.4527	2.1036	0.137995	0.724592
C6orf120	-0.342732	0.129803	-0.60999	-0.189439	-0.153293	0.319242	-0.420551	0.472535	-0.267258	-0.739793	18.3433	2.10108	0.138347	0.724592
CDC42EP4	-0.171557	0.00316558	-0.379152	-0.115802	-0.0557544	0.118968	-0.263349	0.174722	-0.207595	-0.382317	20.8299	2.10012	0.138481	0.724592
CD109	-0.0255597	-0.595645	-0.407219	-0.0705809	0.0450212	-0.525064	-0.336638	-0.570085	-0.381659	0.188426	18.709	2.09983	0.138522	0.724592
DNAJB2	0.39463	-0.314035	-0.204905	-0.00420955	0.39884	-0.309825	-0.200696	-0.708665	-0.599535	0.10913	18.8981	2.09875	0.138674	0.724592
PSMB3	0.0742029	0.352177	0.705836	-0.0298125	0.104015	0.38199	0.735648	0.277974	0.631633	0.353658	19.6025	2.09793	0.138789	0.724592
AAGAB	-0.497037	0.0223519	1.14599	-0.300096	-0.196941	0.322448	1.44609	0.519389	1.64303	1.12364	18.9924	2.10327	0.138965	0.724592
BORCS7	-1.13111	-1.99493	-2.1282	-1.23895	0.107835	-0.755979	-0.889254	-0.863814	-0.997089	-0.133275	18.7525	2.11264	0.138983	0.724592
KRT75	0.388617	-0.254697	0.421496	-0.107018	0.495635	-0.147679	0.528513	-0.643314	0.0328784	0.676192	20.9026	2.10051	0.139001	0.724592
ANAPC7	-0.16002	0.0675577	0.00364932	-0.149484	-0.0105354	0.217042	0.153134	0.227577	0.163669	-0.0639083	20.3961	2.09628	0.13902	0.724592
PIGS	-0.624966	-0.128682	-0.9577	-0.908037	0.283072	0.779356	-0.0496629	0.496284	-0.332735	-0.829019	18.5201	2.09608	0.139048	0.724592
FAHD2A	0.611803	0.182395	0.327365	0.224414	0.387389	-0.0420189	0.102951	-0.429408	-0.284438	0.14497	20.1082	2.09506	0.139191	0.724592
PSMG2	0.154553	0.481305	0.326242	-0.279692	0.434244	0.760996	0.605934	0.326752	0.17169	-0.155063	19.315	2.09308	0.139471	0.724592
FCHSD1	0.692096	0.51425	1.12426	0.387236	0.30486	0.127014	0.737021	-0.177846	0.43216	0.610007	16.3474	2.09306	0.139474	0.724592
THOP1	-0.0941003	0.0996247	-0.21868	0.136934	-0.231034	-0.0373094	-0.355614	0.193725	-0.12458	-0.318305	19.9457	2.09259	0.139541	0.724592
PACSIN2	-0.143908	-0.276009	-0.277898	-0.344735	0.200827	0.068726	0.066837	-0.132101	-0.13399	-0.00188903	21.3156	2.09241	0.139566	0.724592
STEAP3	0.426576	-0.18879	0.118394	0.156417	0.270158	-0.345207	-0.0380233	-0.615365	-0.308181	0.307184	22.2903	2.09392	0.139629	0.724592
TACC3	-0.0471654	0.056668	-0.374675	-0.0864606	0.0392952	0.143129	-0.288215	0.103833	-0.32751	-0.431343	19.1188	2.09193	0.139634	0.724592
PARN	-0.34158	0.0212425	0.0582649	-0.17786	-0.16372	0.199103	0.236125	0.362823	0.399845	0.0370223	19.7286	2.0915	0.139694	0.724592
ISCA2	-0.297918	-0.0774196	-0.56987	0.320425	-0.618343	-0.397845	-0.890296	0.220498	-0.271952	-0.492451	18.9402	2.08806	0.140181	0.724592
SBF1	-0.974166	-1.24165	-1.11701	-0.711958	-0.262208	-0.529689	-0.405055	-0.267481	-0.142847	0.124634	18.2445	2.08746	0.140266	0.724592
IFIT3	1.20752	0.133009	2.63342	2.62837	-1.42085	-2.49536	0.00505332	-1.07451	1.42591	2.50041	18.3115	2.11091	0.140275	0.724592
AMIGO2	0.28437	-0.114867	0.188033	-0.0520973	0.336467	-0.0627693	0.240131	-0.399236	-0.0963362	0.3029	19.6577	2.08647	0.140407	0.724592
CSN2	0.676373	-0.930389	-1.00177	-0.528424	1.2048	-0.401965	-0.473341	-1.60676	-1.67814	-0.0713766	19.1898	2.10193	0.140518	0.724592
UBQLN1	0.280917	0.126101	2.10541	0.433903	-0.152986	-0.307802	1.67151	-0.154816	1.82449	1.97931	19.7349	2.11919	0.140541	0.724592
NR2C2	0.361828	-0.0264023	0.625595	0.0779845	0.283843	-0.104387	0.54761	-0.38823	0.263767	0.651997	18.4992	2.08505	0.140608	0.724592
CNN1	-0.508019	-0.584688	-0.751634	-0.335131	-0.172888	-0.249557	-0.416502	-0.0766694	-0.243615	-0.166945	18.7056	2.08283	0.140926	0.724592
GAPDH	0.101464	-0.0416689	0.132154	-0.0956664	0.197131	0.0539975	0.22782	-0.143133	0.0306893	0.173823	29.4572	2.08228	0.141004	0.724592
OSTM1	0.863205	0.355467	1.36361	0.12069	0.742515	0.234778	1.24292	-0.507737	0.5004	1.00814	18.2769	2.08214	0.141025	0.724592
TUBGCP2	-0.154927	-0.0374956	0.00104372	-0.315793	0.160866	0.278297	0.316836	0.117431	0.155971	0.0385393	19.2628	2.08207	0.141034	0.724592
MRPL11	0.0825675	-0.0181681	-0.165757	-0.0565712	0.139139	0.0384031	-0.109186	-0.100736	-0.248325	-0.147589	21.3691	2.07957	0.141391	0.72514
AKR1B1	0.101897	-0.184538	-0.178141	0.0118705	0.090027	-0.196409	-0.190012	-0.286436	-0.280039	0.00639687	22.4719	2.0782	0.141588	0.72514
ATG5	-0.140103	-0.205069	0.319487	-0.0382187	-0.101884	-0.16685	0.357706	-0.0649663	0.45959	0.524556	18.642	2.07751	0.141688	0.72514
SWAP70	0.0777376	0.186439	0.317513	0.0626719	0.0150656	0.123768	0.254841	0.108702	0.239775	0.131073	21.1289	2.07709	0.141748	0.72514
SEC23A	0.132861	-0.268528	-0.128193	-0.00652397	0.139385	-0.262004	-0.121669	-0.401389	-0.261054	0.140335	21.4086	2.07653	0.141828	0.72514
H1-2	0.226806	0.276495	0.644337	0.289288	-0.0624817	-0.0127932	0.355049	0.0496885	0.417531	0.367842	20.4628	2.07554	0.141971	0.72514
PDLIM3	0.180599	0.0244887	-0.039108	0.351325	-0.170727	-0.326837	-0.390434	-0.15611	-0.219707	-0.0635967	19.8775	2.07496	0.142054	0.72514
TAGLN2	0.195804	-0.121173	-0.164804	0.0131208	0.182683	-0.134293	-0.177925	-0.316977	-0.360608	-0.0436318	25.1367	2.07366	0.142242	0.725435
OSBPL3	-0.171691	-1.01951	-0.858707	-0.0187161	-0.152975	-1.00079	-0.839991	-0.847819	-0.687017	0.160802	16.9518	2.06949	0.142844	0.726617
PHC3	0.664261	0.572903	0.688116	-0.00390953	0.668171	0.576812	0.692025	-0.0913585	0.0238545	0.115213	17.5407	2.06907	0.142905	0.726617
POLDIP3	0.271079	0.0733566	0.0884463	0.136119	0.13496	-0.0627624	-0.0476727	-0.197722	-0.182633	0.0150897	20.8821	2.06794	0.143068	0.726617
CMAS	0.141158	0.336903	1.07885	0.0028698	0.138288	0.334034	1.07598	0.195746	0.937694	0.741948	19.8036	2.07521	0.143086	0.726617
TMEM87A	0.335144	-0.00483539	1.23323	0.309137	0.0260069	-0.313972	0.92409	-0.339979	0.898083	1.23806	18.2028	2.06638	0.143295	0.726617
KRT16	-1.43269	1.31217	0.161901	-0.0175165	-1.41517	1.32969	0.179418	2.74486	1.59459	-1.15027	17.1113	2.06536	0.143447	0.726617
TRIR	1.48452	0.0894952	0.970789	0.141035	1.34348	-0.0515397	0.829754	-1.39502	-0.513728	0.881294	16.6582	2.06455	0.143562	0.726617
PPP1CC	0.132547	0.375264	0.0406602	0.101174	0.031373	0.27409	-0.0605139	0.242717	-0.0918869	-0.334604	20.8849	2.06422	0.14361	0.726617
MDH1	0.0254087	0.192413	0.185839	0.157053	-0.131644	0.0353605	0.0287864	0.167004	0.16043	-0.00657411	24.3273	2.06302	0.143785	0.726617
GLIPR2	0.108482	0.172748	0.381046	0.196428	-0.0879456	-0.0236796	0.184619	0.064266	0.272564	0.208298	21.0713	2.06281	0.143816	0.726617
VRK1	0.0628011	0.303899	0.278525	0.415925	-0.353124	-0.112026	-0.1374	0.241098	0.215724	-0.0253738	19.4457	2.06215	0.143912	0.726617
DCAF6	0.184994	0.200457	-0.0209936	0.502691	-0.317697	-0.302235	-0.523685	0.0154623	-0.205988	-0.22145	19.091	2.05914	0.144353	0.726668
LRCH1	0.530448	-0.419891	0.434911	-0.277105	0.807553	-0.142787	0.712015	-0.95034	-0.0955379	0.854802	17.1063	2.05809	0.144506	0.726668
BZW2	-0.219552	-0.39016	-0.371215	-0.381569	0.162017	-0.008591	0.0103538	-0.170608	-0.151663	0.0189448	20.8386	2.05775	0.144556	0.726668
ATP5PB	0.395011	0.00402193	0.00672575	0.121263	0.273747	-0.117242	-0.114538	-0.390989	-0.388285	0.00270382	21.1794	2.05761	0.144577	0.726668
YAP1	0.332979	0.0706917	0.22646	0.401077	-0.0680985	-0.330385	-0.174617	-0.262287	-0.106519	0.155768	21.6216	2.05627	0.144774	0.726668
ZMYM3	0.194079	0.316536	1.12132	0.171254	0.0228248	0.145282	0.950067	0.122457	0.927243	0.804785	18.5134	2.0556	0.144872	0.726668
FUS	0.0715794	0.0231145	-0.0314507	0.180372	-0.108793	-0.157258	-0.211823	-0.0484649	-0.10303	-0.0545652	23.5792	2.05501	0.14496	0.726668
PLOD2	0.451053	0.21383	0.420832	0.173389	0.277664	0.0404409	0.247443	-0.237223	-0.0302211	0.207002	20.9552	2.05495	0.144968	0.726668
MRPS36	0.150855	0.0305419	0.061104	0.44481	-0.293955	-0.414268	-0.383706	-0.120313	-0.0897513	0.0305621	20.2119	2.05377	0.145142	0.726886
TUBGCP6	0.291103	0.258499	0.0419836	0.636892	-0.345789	-0.378392	-0.594908	-0.0326032	-0.249119	-0.216516	18.7288	2.0508	0.14558	0.72804
MTPN	0.258141	-0.158843	-0.0530513	0.384178	-0.126037	-0.543021	-0.43723	-0.416984	-0.311193	0.105792	21.3222	2.05044	0.145634	0.72804
MANF	0.403404	0.0268666	0.320988	0.427509	-0.0241052	-0.400643	-0.106521	-0.376537	-0.0824158	0.294122	20.8924	2.04753	0.146065	0.728884
DSG1	-1.13793	-1.45835	-1.6671	-0.550066	-0.587859	-0.908279	-1.11704	-0.32042	-0.52918	-0.20876	16.2471	2.04697	0.146149	0.728884
FTSJ1	0.165589	-0.157312	0.54899	-0.139883	0.305472	-0.0174287	0.688873	-0.322901	0.383401	0.706302	18.8691	2.04543	0.146377	0.728884
SAFB	0.177605	-0.0541776	-0.0962014	0.13685	0.0407544	-0.191028	-0.233052	-0.231782	-0.273806	-0.0420238	21.8614	2.04445	0.146523	0.728884
POP7	-0.161382	0.0163558	1.31416	-0.219314	0.0579321	0.23567	1.53347	0.177738	1.47554	1.2978	18.8598	2.04856	0.146687	0.728884
TBCD	-0.0550561	0.232493	0.228224	-0.0699985	0.0149424	0.302491	0.298223	0.287549	0.28328	-0.0042688	19.9168	2.04304	0.146734	0.728884
NDUFAF4	-0.242918	0.419804	-0.395793	-0.0732855	-0.169632	0.49309	-0.322508	0.662722	-0.152875	-0.815597	19.3496	2.03968	0.147237	0.728884
MAP7D1	-0.00736586	-0.15676	-0.334347	-0.0509569	0.043591	-0.105804	-0.28339	-0.149395	-0.326981	-0.177586	20.5465	2.03794	0.147497	0.728884
DSTYK	-1.4227	-0.479802	0.730876	-1.03809	-0.384608	0.55829	1.76897	0.942898	2.15358	1.21068	16.6932	2.03746	0.147569	0.728884
TNIP3	-0.0313719	-0.788904	-0.230284	0.537202	-0.568574	-1.32611	-0.767486	-0.757532	-0.198912	0.558619	15.5368	2.03611	0.147772	0.728884
ZPR1	-0.261955	0.00115992	-0.166731	-0.312583	0.0506288	0.313743	0.145853	0.263115	0.0952238	-0.167891	20.0002	2.03524	0.147903	0.728884
TRAPPC3	0.258636	0.116482	0.246836	0.292147	-0.0335112	-0.175665	-0.0453113	-0.142153	-0.0118001	0.130353	21.0232	2.0346	0.147999	0.728884
LAMTOR3	-0.250979	0.081361	-0.0406298	0.565849	-0.816828	-0.484488	-0.606479	0.33234	0.210349	-0.121991	19.6664	2.0344	0.148029	0.728884
FUCA1	-0.442111	-0.369579	-0.193918	1.08093	-1.52304	-1.45051	-1.27485	0.0725321	0.248193	0.175661	18.2042	2.03348	0.148169	0.728884
ASH2L	0.215381	0.17452	0.341091	-0.154422	0.369803	0.328942	0.495514	-0.0408616	0.12571	0.166572	21.4156	2.03328	0.148198	0.728884
CTPS1	-0.148874	-0.14278	-0.316064	-0.228879	0.0800049	0.0860986	-0.0871852	0.00609371	-0.16719	-0.173284	23.0002	2.03265	0.148294	0.728884
XRCC5	0.14903	0.0531519	0.00433615	0.114654	0.0343758	-0.061502	-0.110318	-0.0958779	-0.144694	-0.0488158	24.1485	2.03086	0.148564	0.728884
SNRPB2	1.04179	-1.37957	-1.356	-0.487371	1.52916	-0.892203	-0.868634	-2.42136	-2.39779	0.0235699	17.8885	2.03414	0.148687	0.728884
CD70	1.00784	0.0599717	-0.411815	0.662038	0.345798	-0.602066	-1.07385	-0.947864	-1.41965	-0.471787	17.8367	2.02969	0.148741	0.728884
PRAG1	0.791695	0.223409	1.15725	-0.00225708	0.793952	0.225666	1.15951	-0.568286	0.365553	0.933839	17.4205	2.0287	0.148891	0.728884
COX20	0.409289	0.335254	0.298755	0.223813	0.185476	0.11144	0.0749416	-0.0740354	-0.110534	-0.0364987	21.5675	2.02773	0.149039	0.728884
MRPL21	0.296607	0.181446	-0.419392	-0.244951	0.541558	0.426397	-0.174441	-0.115161	-0.716	-0.600838	19.9779	2.02723	0.149115	0.728884
LCLAT1	0.125887	0.695813	0.581944	0.281067	-0.15518	0.414747	0.300877	0.569927	0.456057	-0.11387	19.0125	2.02624	0.149265	0.728884
PACSIN3	0.0194911	-0.0237519	-0.292515	-0.172091	0.191582	0.148339	-0.120424	-0.0432431	-0.312006	-0.268763	20.2424	2.02576	0.149337	0.728884
CLTB	0.245019	-0.0561301	0.164944	0.254414	-0.00939581	-0.310545	-0.0894709	-0.301149	-0.0800751	0.221074	21.5412	2.0248	0.149484	0.728884
DDR2	-0.194196	0.0659197	0.777315	-0.183582	-0.0106142	0.249501	0.960896	0.260115	0.97151	0.711395	19.5565	2.02849	0.1495	0.728884
BLOC1S5	1.1727	-0.599188	-0.0776087	0.898084	0.274617	-1.49727	-0.975693	-1.77189	-1.25031	0.52158	17.0901	2.02348	0.149685	0.728884
EFR3A	0.0691484	-0.0254171	0.548304	0.171115	-0.101967	-0.196532	0.377189	-0.0945655	0.479156	0.573722	18.6211	2.02271	0.149803	0.728884
SPDL1	1.84794	0.453188	0.978653	0.265254	1.58268	0.187934	0.7134	-1.39475	-0.869285	0.525466	18.0131	2.02268	0.149807	0.728884
SAE1	-0.184153	0.0857661	0.0497383	-0.0992411	-0.0849118	0.185007	0.148979	0.269919	0.233891	-0.0360278	21.5434	2.02029	0.150173	0.728884
TNFRSF1A	0.666029	-0.235074	0.964052	0.281941	0.384089	-0.517015	0.682111	-0.901103	0.298023	1.19913	17.7777	2.0198	0.150248	0.728884
UPP1	-1.60559	-1.21573	-1.59876	-2.07581	0.470216	0.860081	0.477047	0.389865	0.00683143	-0.383034	19.7771	2.04547	0.150443	0.728884
MED12	-0.0061786	-0.153031	0.504694	-0.245808	0.239629	0.0927763	0.750502	-0.146853	0.510873	0.657725	18.6351	2.01752	0.150598	0.728884
WBP2	0.254491	0.136252	0.331984	0.156828	0.0976631	-0.0205758	0.175156	-0.118239	0.0774929	0.195732	21.2775	2.01718	0.150649	0.728884
FLCN	-0.0896226	0.403084	0.829743	0.144712	-0.234335	0.258372	0.685031	0.492707	0.919365	0.426659	17.7434	2.01581	0.15086	0.728884
OXSM	-1.54503	0.135789	-0.647039	-0.585739	-0.959293	0.721528	-0.0612998	1.68082	0.897993	-0.782828	16.0154	2.01556	0.150899	0.728884
NOC4L	-0.0811655	0.00438929	1.09557	-0.551184	0.470018	0.555573	1.64675	0.0855548	1.17674	1.09118	18.8423	2.01917	0.150922	0.728884
POMGNT2	1.26536	0.149796	-1.13373	-0.966109	2.23147	1.1159	-0.167617	-1.11556	-2.39909	-1.28352	18.0357	2.01848	0.151225	0.728884
ARHGEF10	0.907869	0.200642	1.53987	0.198683	0.709186	0.00195903	1.34118	-0.707227	0.631997	1.33922	17.9524	2.01329	0.151248	0.728884
APOA1	-1.06736	-0.139278	0.330317	-1.16829	0.100924	1.02901	1.4986	0.928085	1.39768	0.469595	17.3104	2.01327	0.151251	0.728884
HJURP	-0.508019	0.211112	-0.87504	-1.1654	0.657383	1.37651	0.290363	0.719131	-0.367021	-1.08615	16.9186	2.01191	0.151461	0.728884
THUMPD1	0.0867576	0.256516	0.419546	-0.0871718	0.173929	0.343688	0.506718	0.169759	0.332789	0.16303	20.1332	2.01133	0.151552	0.728884
TSC22D1	0.0764298	0.327179	0.348171	1.35575	-1.27932	-1.02857	-1.00758	0.25075	0.271742	0.020992	16.6814	2.01089	0.151619	0.728884
SARNP	0.287684	0.0335612	0.0394503	0.196026	0.0916579	-0.162464	-0.156575	-0.254122	-0.248233	0.00588913	22.7064	2.00767	0.152119	0.728884
ROBO1	1.65398	1.35396	0.604659	0.194924	1.45906	1.15904	0.409735	-0.300018	-1.04932	-0.749304	17.5847	2.00712	0.152204	0.728884
BRD8	0.335972	-0.233757	-0.214009	-0.0310471	0.367019	-0.202709	-0.182962	-0.569729	-0.549981	0.0197473	18.8444	2.00693	0.152233	0.728884
SPTLC2	0.131015	0.440407	0.882613	0.566011	-0.434996	-0.125604	0.316602	0.309392	0.751598	0.442206	18.6592	2.00657	0.152289	0.728884
KPNA6	-0.204587	-0.0248606	0.172186	0.233409	-0.437996	-0.258269	-0.0612223	0.179726	0.376773	0.197047	20.9197	2.00652	0.152297	0.728884
CWC22	0.190345	0.45711	0.0325677	-0.0444453	0.23479	0.501555	0.0770129	0.266765	-0.157777	-0.424542	18.951	2.00528	0.152489	0.728884
PACS1	0.282235	-1.02795	-1.03452	-0.480803	0.763038	-0.547144	-0.553715	-1.31018	-1.31675	-0.00657051	16.9489	2.00372	0.152734	0.728884
NDUFS6	-0.0472783	-0.254077	0.748727	0.156437	-0.203715	-0.410514	0.59229	-0.206798	0.796005	1.0028	19.7639	2.00718	0.152773	0.728884
FKBP4	-0.116301	0.0521958	-0.0420785	-0.156045	0.0397443	0.208241	0.113966	0.168496	0.074222	-0.0942743	24.3082	2.00324	0.152809	0.728884
TSEN54	1.27245	1.45109	0.492071	0.294738	0.97771	1.15635	0.197333	0.178639	-0.780377	-0.959016	17.7773	2.00182	0.15303	0.728884
TFE3	1.11067	-0.574727	0.146554	0.0750296	1.03564	-0.649757	0.071524	-1.68539	-0.964112	0.721281	17.0891	2.00168	0.153052	0.728884
MAGED2	-0.0585517	0.125333	0.0661759	-0.0484826	-0.0100691	0.173816	0.114659	0.183885	0.124728	-0.0591575	23.2731	2.00059	0.153222	0.728884
PSMD9	0.0401431	-0.18844	-0.273728	0.157624	-0.117481	-0.346064	-0.431352	-0.228583	-0.313871	-0.0852878	22.0786	1.99943	0.153404	0.728884
ACAT1	-0.114867	0.0645887	0.0103745	-0.172669	0.0578019	0.237258	0.183044	0.179456	0.125242	-0.0542142	21.8904	1.99849	0.153552	0.728884
JMJD1C	0.27212	0.176556	1.09988	0.589725	-0.317604	-0.413169	0.510159	-0.0955646	0.827763	0.923328	17.632	1.99819	0.153598	0.728884
ZNF609	0.510901	-0.174937	-0.319137	1.02847	-0.517569	-1.20341	-1.34761	-0.685838	-0.830038	-0.144201	18.2225	1.99691	0.1538	0.728884
VAV2	1.01382	0.297699	-0.234819	-0.0866728	1.1005	0.384372	-0.148146	-0.716125	-1.24864	-0.532517	16.3285	1.99685	0.153809	0.728884
DHX40	-1.10114	-0.0529819	-0.184055	-0.531689	-0.569454	0.478707	0.347634	1.04816	0.917087	-0.131073	18.1883	1.99653	0.153859	0.728884
POLD1	-0.346243	-0.0233555	-0.229304	0.0969037	-0.443146	-0.120259	-0.326208	0.322887	0.116939	-0.205949	20.3348	1.99597	0.153947	0.728884
CFL2	0.119215	0.198012	0.144626	0.555783	-0.436568	-0.357771	-0.411157	0.0787973	0.0254109	-0.0533865	21.4485	1.99255	0.154486	0.728884
DESI2	-0.284578	0.627775	-1.87487	0.113673	-0.398251	0.514102	-1.98854	0.912353	-1.59029	-2.50264	17.965	1.99478	0.154713	0.728884
MYO19	0.59564	0.466445	0.898699	0.784651	-0.189011	-0.318206	0.114048	-0.129195	0.303059	0.432254	15.7143	1.99022	0.154855	0.728884
TPX2	-0.217379	-0.198663	-0.461438	-0.349391	0.132012	0.150728	-0.112047	0.0187167	-0.244058	-0.262775	20.2104	1.98971	0.154935	0.728884
PCYT2	-0.0100815	0.0889936	0.350528	0.310392	-0.320474	-0.221399	0.0401355	0.0990751	0.360609	0.261534	20.7613	1.98923	0.155011	0.728884
MAP2K6	-0.731629	-0.820994	-0.55973	0.221195	-0.952824	-1.04219	-0.780924	-0.0893644	0.1719	0.261264	17.2439	1.98904	0.155042	0.728884
CASP3	-0.208128	0.0754802	-0.131309	-0.184024	-0.0241039	0.259504	0.0527148	0.283608	0.0768187	-0.206789	21.3731	1.9885	0.155127	0.728884
NFYC	0.0667321	0.0711495	-0.103036	0.173884	-0.107152	-0.102735	-0.27692	0.00441735	-0.169768	-0.174185	21.0791	1.98836	0.155149	0.728884
MKKS	0.0724488	0.0819009	0.547701	-0.131828	0.204277	0.213729	0.679528	0.00945211	0.475252	0.4658	20.5335	1.98793	0.155218	0.728884
NDUFS5	0.599758	-0.189713	-0.0863729	-0.0227717	0.62253	-0.166941	-0.0636012	-0.78947	-0.686131	0.10334	20.1298	1.98919	0.155244	0.728884
CENPB	0.0084223	0.145395	0.637121	0.72154	-0.713117	-0.576145	-0.084419	0.136973	0.628698	0.491726	17.8297	1.98603	0.15552	0.729185
FBXO28	-0.0194846	0.361964	0.184954	0.583407	-0.602892	-0.221443	-0.398453	0.381449	0.204439	-0.17701	18.648	1.98505	0.155676	0.729185
REL	0.060215	1.16549	0.650533	0.209152	-0.148937	0.956333	0.441381	1.10527	0.590318	-0.514952	17.1638	1.98489	0.155701	0.729185
ALDH5A1	-1.19666	-1.0177	-0.889038	-0.781299	-0.415365	-0.236399	-0.10774	0.178966	0.307625	0.128659	18.2704	1.98341	0.155938	0.729221
INPP4B	-0.596784	-0.0948432	-0.180821	-0.358521	-0.238263	0.263678	0.1777	0.50194	0.415963	-0.0859775	18.7032	1.98293	0.156013	0.729221
FOXK1	-0.048474	-0.187371	-0.235417	-0.166753	0.118279	-0.0206179	-0.0686643	-0.138897	-0.186943	-0.0480464	21.727	1.98238	0.156102	0.729221
CSNK1G3	1.04131	0.0850911	1.14277	0.464615	0.5767	-0.379524	0.678157	-0.956224	0.101457	1.05768	16.9526	1.98105	0.156314	0.72924
ANAPC5	-1.12966	0.448519	-0.165346	-0.607347	-0.522317	1.05587	0.442002	1.57818	0.964319	-0.613865	17.4853	1.98036	0.156425	0.72924
MRPS6	0.0816638	0.516432	-0.310681	-0.0603644	0.142028	0.576796	-0.250316	0.434768	-0.392344	-0.827113	19.9765	1.9798	0.156514	0.72924
WDR4	-1.22174	-1.08889	-0.512464	-0.152516	-1.06922	-0.936373	-0.359948	0.13285	0.709275	0.576425	16.9556	1.97731	0.156913	0.72924
STK25	1.26602	0.317295	0.149327	-0.0340225	1.30005	0.351317	0.18335	-0.948729	-1.1167	-0.167967	18.4861	1.97707	0.156952	0.72924
MRPL13	-0.232734	-0.0330654	-0.1658	-0.167402	-0.0653323	0.134337	0.00160211	0.199669	0.0669344	-0.132735	21.0389	1.9745	0.157365	0.72924
QTRT2	-0.271994	0.3507	0.360851	-0.00997497	-0.262019	0.360675	0.370826	0.622693	0.632845	0.0101514	18.474	1.9745	0.157365	0.72924
RPS7	0.178994	0.20901	0.226495	0.123657	0.0553374	0.0853533	0.102838	0.030016	0.047501	0.0174851	23.948	1.97386	0.15747	0.72924
EMSY	0.412015	-0.991981	0.194238	-0.239113	0.651128	-0.752868	0.433351	-1.404	-0.217777	1.18622	16.3899	1.97195	0.157778	0.72924
TMCO1	0.908091	-0.303318	-0.220996	-0.160396	1.06849	-0.142922	-0.0605998	-1.21141	-1.12909	0.0823219	19.8168	1.98529	0.157792	0.72924
APOL2	0.074262	-0.241387	-0.211291	0.0301428	0.0441192	-0.27153	-0.241433	-0.315649	-0.285553	0.0300967	20.4129	1.9718	0.157801	0.72924
POLR3D	-0.173594	0.447896	0.310714	0.275025	-0.44862	0.17287	0.0356888	0.62149	0.484308	-0.137182	19.769	1.97111	0.157914	0.72924
SUGP2	0.0213574	-0.0159402	-0.106705	0.186982	-0.165625	-0.202922	-0.293687	-0.0372976	-0.128063	-0.0907649	20.131	1.97068	0.157982	0.72924
DTD1	0.143989	0.524111	0.432951	-0.359081	0.503069	0.883191	0.792031	0.380122	0.288962	-0.0911599	18.4857	1.96916	0.158229	0.72924
DDX55	-0.598972	-0.420318	0.0851586	-0.618857	0.0198848	0.198539	0.704015	0.178654	0.684131	0.505476	17.3873	1.96903	0.15825	0.72924
COL12A1	0.0160684	-0.137775	-0.423274	-0.107825	0.123894	-0.0299493	-0.315449	-0.153843	-0.439343	-0.2855	19.1452	1.96775	0.158457	0.72924
POFUT1	-0.101546	0.0931769	-0.30412	-0.323564	0.222018	0.416741	0.0194438	0.194723	-0.202574	-0.397297	20.4843	1.96717	0.158552	0.72924
SEC63	-0.304855	-0.0586622	-0.0788257	-0.201416	-0.10344	0.142754	0.12259	0.246193	0.22603	-0.0201635	19.994	1.96701	0.158578	0.72924
ACOT7	0.0844622	0.2209	0.126796	0.167209	-0.0827469	0.0536912	-0.0404133	0.136438	0.0423336	-0.0941044	23.127	1.96589	0.15876	0.72924
STX5	-0.132917	0.157957	0.618264	0.00283316	-0.13575	0.155124	0.615431	0.290874	0.751181	0.460307	19.2232	1.96549	0.158826	0.72924
ESYT2	0.454973	-0.0651618	0.0262412	-0.101186	0.556159	0.0360242	0.127427	-0.520134	-0.428731	0.0914031	19.4175	1.96451	0.158985	0.72924
CIAPIN1	-0.305302	-0.161394	-0.181606	-0.0305571	-0.274745	-0.130836	-0.151048	0.143908	0.123697	-0.020212	21.0742	1.96227	0.15935	0.72924
RB1	-0.262979	-0.0789481	-0.129031	-0.278922	0.0159433	0.199974	0.149891	0.184031	0.133947	-0.0500832	20.447	1.96168	0.159447	0.72924
RNF220	0.0181497	-0.248936	-0.271148	0.128117	-0.109967	-0.377054	-0.399265	-0.267086	-0.289298	-0.0222118	19.1441	1.96132	0.159506	0.72924
MIER1	0.137926	-0.477837	-0.529557	-0.254762	0.392688	-0.223075	-0.274795	-0.615763	-0.667483	-0.0517196	18.1034	1.96123	0.159521	0.72924
PHLDB1	0.306238	-0.0341331	0.0513969	0.332566	-0.0263285	-0.366699	-0.281169	-0.340371	-0.254841	0.08553	20.5701	1.96042	0.159652	0.72924
MRPL38	0.0760519	0.171977	-0.0157283	-0.093138	0.16919	0.265115	0.0774096	0.0959248	-0.0917802	-0.187705	21.4742	1.95968	0.159775	0.72924
MINK1	-0.298432	-0.622998	0.136431	0.155983	-0.454415	-0.778981	-0.0195514	-0.324566	0.434864	0.759429	16.029	1.95965	0.159779	0.72924
SRFBP1	0.0195883	0.319679	0.268337	0.123155	-0.103567	0.196524	0.145182	0.300091	0.248748	-0.0513427	19.891	1.95762	0.160112	0.730158
MAP4K2	0.174366	-0.223887	0.932857	0.0817631	0.0926027	-0.30565	0.851094	-0.398253	0.758492	1.15674	17.5933	1.95501	0.160541	0.730434
ERO1A	-0.059231	-0.0810501	0.069656	-0.329721	0.27049	0.248671	0.399377	-0.0218191	0.128887	0.150706	22.4521	1.95459	0.160611	0.730434
PSAP	0.167734	0.102515	-0.00833641	0.281058	-0.113324	-0.178543	-0.289394	-0.0652187	-0.17607	-0.110851	22.563	1.95395	0.160716	0.730434
PLEKHA5	-0.00629101	-0.158214	-0.231508	-0.0189353	0.0126443	-0.139279	-0.212573	-0.151923	-0.225217	-0.0732939	19.9863	1.95348	0.160794	0.730434
CHD8	-0.114854	-0.119446	0.342165	0.182921	-0.297775	-0.302367	0.159244	-0.00459203	0.457019	0.461611	18.4953	1.95088	0.161223	0.730434
RPS10	-0.84657	-0.86726	-1.14115	-0.971569	0.124998	0.104308	-0.169586	-0.0206901	-0.294584	-0.273894	20.7151	1.96646	0.161549	0.730434
ELOB	0.190694	-0.0439415	0.00517715	0.229255	-0.0385608	-0.273196	-0.224077	-0.234635	-0.185517	0.0491187	20.8541	1.9489	0.161552	0.730434
KIAA1217	0.541892	0.118555	0.202048	0.255513	0.286379	-0.136959	-0.0534649	-0.423338	-0.339844	0.0834937	19.1681	1.94876	0.161574	0.730434
PLCD3	-0.0942513	-0.279431	-0.466651	-0.216676	0.122425	-0.0627548	-0.249974	-0.18518	-0.372399	-0.18722	19.9057	1.94872	0.161581	0.730434
EXOSC4	-0.528267	-0.222964	-0.422056	-0.581639	0.0533719	0.358675	0.159583	0.305303	0.106211	-0.199091	19.2831	1.94849	0.16162	0.730434
SELENOH	-0.80906	-0.672966	-0.8852	-0.945084	0.136024	0.272118	0.0598849	0.136094	-0.0761393	-0.212234	19.2019	1.94747	0.16179	0.730434
TIMM10	1.89573	-0.0364238	0.0258702	0.889948	1.00578	-0.926372	-0.864078	-1.93216	-1.86986	0.062294	20.0138	1.98042	0.162004	0.730434
PKM	0.135004	0.0773463	0.158495	0.0899187	0.0450853	-0.0125724	0.0685768	-0.0576577	0.0234915	0.0811492	27.676	1.94569	0.162084	0.730434
AARSD1	-0.307283	-0.260218	-0.439132	-0.259238	-0.0480449	-0.000979862	-0.179893	0.0470651	-0.131848	-0.178913	20.5549	1.94484	0.162226	0.730434
FHL2	0.0636439	-0.683726	-0.517533	-0.594322	0.657965	-0.0894049	0.0767889	-0.74737	-0.581176	0.166194	22.1405	1.96005	0.162255	0.730434
ZMYM2	0.136366	0.367923	-0.119047	0.17546	-0.0390937	0.192463	-0.294507	0.231557	-0.255413	-0.48697	18.8796	1.94384	0.162394	0.730434
GTPBP4	-0.265086	-0.0806407	-0.0934723	-0.301749	0.036663	0.221108	0.208277	0.184445	0.171614	-0.0128316	20.6597	1.94215	0.162675	0.730434
MRPS11	-0.486257	-0.142393	-0.662385	-0.393774	-0.0924821	0.251382	-0.26861	0.343864	-0.176128	-0.519992	20.7716	1.94343	0.162688	0.730434
LENG1	0.138869	1.09028	-0.274985	1.60655	-1.46768	-0.516268	-1.88154	0.951415	-0.413854	-1.36527	18.5283	1.94826	0.162731	0.730434
COA6	-0.167268	0.187786	-0.238831	0.45737	-0.624638	-0.269585	-0.696201	0.355053	-0.0715632	-0.426617	20.2461	1.94135	0.16281	0.730434
DVL2	1.44195	0.215941	0.206499	0.634401	0.807545	-0.41846	-0.427902	-1.226	-1.23545	-0.00944169	18.4097	1.94062	0.162932	0.730434
TMEM184C	-0.18549	0.664838	0.0313577	0.0676236	-0.253114	0.597215	-0.0362658	0.850329	0.216848	-0.63348	18.806	1.93942	0.163132	0.730742
MTX1	0.514487	-0.0889431	0.152307	0.0612166	0.45327	-0.15016	0.09109	-0.60343	-0.36218	0.24125	20.008	1.93851	0.163285	0.73084
METTL1	-0.47048	-1.00529	-1.11128	0.73218	-1.20266	-1.73747	-1.84345	-0.534815	-0.640795	-0.105981	17.8715	1.93524	0.163835	0.731076
TUFT1	-0.0832	0.114714	-0.282729	-0.415333	0.332133	0.530047	0.132604	0.197914	-0.199529	-0.397444	18.4895	1.93515	0.16385	0.731076
BCAR1	0.86562	-0.133877	0.399028	0.388145	0.477474	-0.522023	0.0108823	-0.999497	-0.466592	0.532905	18.0362	1.93434	0.163987	0.731076
LRRC57	0.252035	0.828485	0.744227	0.0641264	0.187908	0.764359	0.680101	0.57645	0.492193	-0.0842576	18.7374	1.93391	0.16406	0.731076
CHMP6	-0.158998	-0.143523	0.41844	0.0590921	-0.21809	-0.202615	0.359348	0.0154749	0.577438	0.561963	20.0207	1.93376	0.164083	0.731076
CNPY4	0.522886	0.396986	0.440233	0.623051	-0.100165	-0.226065	-0.182817	-0.1259	-0.0826529	0.0432475	19.8259	1.93213	0.164359	0.731076
MUS81	-0.365299	-2.58205e-05	0.136431	-0.912711	0.547412	0.912685	1.04914	0.365273	0.50173	0.136457	16.1315	1.93211	0.164363	0.731076
GPKOW	-0.0238473	0.0839676	-0.213268	0.2011	-0.224947	-0.117132	-0.414368	0.107815	-0.189421	-0.297236	21.0334	1.93195	0.16439	0.731076
DEGS1	0.370975	0.196667	1.11615	0.0586461	0.312329	0.13802	1.05751	-0.174309	0.745178	0.919487	17.4179	1.92896	0.164896	0.731998
RUVBL2	-0.157037	0.0333504	-0.0443211	-0.144009	-0.0130279	0.17736	0.0996882	0.190388	0.112716	-0.0776715	23.2453	1.92815	0.165033	0.731998
CELSR2	1.32537	-0.490907	-0.172053	0.61875	0.706616	-1.10966	-0.790803	-1.81627	-1.49742	0.318854	16.8571	1.92805	0.165052	0.731998
NCKIPSD	0.710003	-0.398921	-0.312027	-0.178254	0.888257	-0.220668	-0.133773	-1.10892	-1.02203	0.0868946	16.8917	1.92745	0.165153	0.731998
TM7SF3	0.863252	-1.09729	-0.861342	-0.397363	1.26062	-0.699927	-0.463979	-1.96054	-1.72459	0.235948	17.9562	1.92684	0.165256	0.731998
KIF1A	0.122543	0.328099	0.704273	-0.145665	0.268208	0.473764	0.849938	0.205556	0.58173	0.376174	18.4266	1.92283	0.16594	0.732218
CKAP4	0.110446	-0.0803328	-0.0250079	0.0438583	0.0665874	-0.124191	-0.0688662	-0.190779	-0.135454	0.055325	22.798	1.92206	0.166071	0.732218
FADS1	0.205407	0.319441	0.296022	0.360426	-0.155019	-0.040985	-0.0644044	0.114034	0.0906147	-0.0234194	19.638	1.92156	0.166156	0.732218
CDK4	0.930892	-0.511329	-0.69897	-0.175281	1.10617	-0.336048	-0.523688	-1.44222	-1.62986	-0.187641	18.7201	1.92486	0.166173	0.732218
MAP4K4	0.468547	0.330256	0.654272	0.48736	-0.0188133	-0.157104	0.166912	-0.13829	0.185725	0.324016	18.7997	1.92104	0.166246	0.732218
CSNK1D	0.227718	0.00065906	-0.0460675	0.163866	0.0638519	-0.163207	-0.209934	-0.227059	-0.273786	-0.0467266	20.2875	1.92067	0.16631	0.732218
CENPC	-0.00238754	0.282757	0.479488	-0.0440464	0.0416589	0.326803	0.523534	0.285144	0.481875	0.196731	18.2982	1.92016	0.166397	0.732218
RNPS1	0.166512	0.0541129	0.0743296	0.199141	-0.0326285	-0.145028	-0.124811	-0.112399	-0.0921827	0.0202166	23.144	1.91876	0.166636	0.732218
ASCC3	0.116733	-0.469878	-0.874336	-0.473153	0.589887	0.00327499	-0.401182	-0.586612	-0.991069	-0.404457	18.6192	1.91849	0.166683	0.732218
SRP14	0.056973	0.104307	0.200719	0.330253	-0.27328	-0.225946	-0.129534	0.047334	0.143746	0.0964116	22.2185	1.91773	0.166814	0.732218
RBM22	0.129926	0.145024	-0.0489184	-0.0297167	0.159642	0.174741	-0.0192017	0.0150982	-0.178844	-0.193942	21.1015	1.91724	0.166897	0.732218
CXADR	0.519604	0.383603	0.56149	0.420824	0.0987797	-0.0372209	0.140666	-0.136001	0.041886	0.177887	21.1505	1.91689	0.166957	0.732218
SH3PXD2B	0.101128	0.130845	0.349189	0.105863	-0.00473487	0.0249821	0.243326	0.029717	0.248061	0.218344	21.3379	1.91654	0.167018	0.732218
AP5Z1	-1.22428	-0.707262	-0.765318	-1.32997	0.10569	0.622708	0.564653	0.517018	0.458963	-0.0580553	16.9033	1.91405	0.167446	0.733146
NUMA1	0.119087	-0.0191117	0.0757182	0.186494	-0.0674072	-0.205606	-0.110776	-0.138199	-0.0433691	0.0948299	21.8821	1.91378	0.167493	0.733146
MRPL37	-0.272735	-0.178315	-0.430756	-0.452165	0.179431	0.273851	0.0214091	0.0944204	-0.158021	-0.252442	20.1504	1.91228	0.167753	0.733705
AXL	0.153231	-0.142226	-0.151877	-0.0665295	0.219761	-0.0756969	-0.0853473	-0.295458	-0.305108	-0.0096504	20.3086	1.9106	0.168043	0.733799
RPS24	-0.0424499	-0.148592	0.384543	-0.327142	0.284692	0.17855	0.711686	-0.106142	0.426993	0.533136	21.9557	1.91384	0.168143	0.733799
POGLUT1	0.00719217	-0.0949254	-0.248021	-0.338478	0.34567	0.243552	0.0904567	-0.102118	-0.255213	-0.153096	20.535	1.90986	0.168171	0.733799
DFFA	-0.546605	-0.409744	-0.441448	-0.462473	-0.0841326	0.0527285	0.0210248	0.136861	0.105157	-0.0317037	20.794	1.90838	0.168427	0.734343
TSPAN3	0.448738	0.067507	0.225895	0.242453	0.206286	-0.174946	-0.0165574	-0.381231	-0.222843	0.158388	21.7218	1.90564	0.168904	0.734855
PTPRJ	0.583018	1.23484	1.67464	1.38619	-0.803177	-0.151357	0.288445	0.65182	1.09162	0.439802	17.4866	1.905	0.169015	0.734855
BMI1	0.656168	0.259772	0.73596	0.445421	0.210747	-0.185649	0.290539	-0.396396	0.0797917	0.476188	17.7527	1.90429	0.169139	0.734855
DRP2	1.19915	0.417486	0.529658	0.412225	0.786928	0.00526031	0.117433	-0.781668	-0.669495	0.112173	19.415	1.90751	0.169158	0.734855
TRMT5	-0.166818	0.242362	-0.201867	-0.0993006	-0.0675172	0.341663	-0.102566	0.40918	-0.0350489	-0.444229	20.157	1.90367	0.169247	0.734855
BCKDK	0.0589509	0.417703	0.521903	0.615489	-0.556538	-0.197786	-0.0935859	0.358752	0.462952	0.1042	18.026	1.90267	0.169423	0.734855
ZHX1	-0.707942	-0.357338	0.51569	-0.496555	-0.211387	0.139217	1.01224	0.350604	1.22363	0.873028	17.0181	1.9024	0.16947	0.734855
FBL	-0.176169	-0.0300071	-0.0135273	-0.191836	0.0156664	0.161829	0.178308	0.146162	0.162642	0.0164798	23.3053	1.90095	0.169723	0.735106
HSBP1	-0.0928481	-0.334489	-0.181405	0.302424	-0.395272	-0.636914	-0.48383	-0.241641	-0.0885573	0.153084	20.5789	1.90055	0.169792	0.735106
ABL2	-0.772656	0.746901	0.290595	0.162368	-0.935024	0.584533	0.128227	1.51956	1.06325	-0.456306	16.8824	1.89691	0.170433	0.73608
MYH11	0.295924	0.109345	0.372466	0.302339	-0.00641477	-0.192994	0.0701276	-0.186579	0.0765424	0.263121	21.5303	1.89639	0.170524	0.73608
SELENOS	0.0617382	0.196668	0.856167	0.142416	-0.0806778	0.0542524	0.713752	0.13493	0.794429	0.659499	18.3067	1.8959	0.17061	0.73608
ATP5IF1	0.6686	0.134455	0.118507	0.801928	-0.133328	-0.667473	-0.683422	-0.534145	-0.550094	-0.0159483	21.003	1.9074	0.170617	0.73608
RPL11	0.0904209	0.0414522	-0.0925763	-0.109118	0.199539	0.15057	0.0165416	-0.0489687	-0.182997	-0.134029	24.1563	1.89423	0.170905	0.73608
HSDL2	-0.115873	0.16186	0.098002	0.126975	-0.242847	0.0348857	-0.0289726	0.277733	0.213875	-0.0638583	20.9247	1.89393	0.170957	0.73608
DPM1	0.0451385	-0.423093	-0.469475	-0.276422	0.321561	-0.14667	-0.193053	-0.468231	-0.514614	-0.0463827	22.0716	1.89629	0.171119	0.73608
RPL14	-0.200032	0.11006	-0.140036	-0.075378	-0.124654	0.185438	-0.0646579	0.310093	0.0599963	-0.250096	23.952	1.89268	0.171177	0.73608
ABHD10	-0.341674	-0.410034	-0.475211	-0.305545	-0.0361282	-0.104489	-0.169666	-0.0683604	-0.133537	-0.0651769	20.2116	1.8925	0.171209	0.73608
ZRANB2	-0.0528579	-0.520467	-0.45448	-0.217693	0.164835	-0.302774	-0.236788	-0.467609	-0.401622	0.0659866	19.6012	1.8909	0.171492	0.736727
THEM6	-0.581056	0.661627	0.203932	0.0608363	-0.641893	0.600791	0.143095	1.24268	0.784988	-0.457695	18.7187	1.88992	0.171666	0.736905
STOML2	-0.175616	-0.0413659	-0.219862	-0.140936	-0.0346791	0.0995705	-0.0789259	0.13425	-0.0442468	-0.178496	23.5795	1.88781	0.172041	0.737639
BOP1	-0.182122	0.0232948	-0.110754	-0.239082	0.0569599	0.262377	0.128329	0.205417	0.0713688	-0.134048	21.6002	1.88672	0.172234	0.737639
NACC1	0.0602279	-0.083444	-0.0704321	0.28943	-0.229202	-0.372874	-0.359863	-0.143672	-0.13066	0.0130118	21.1477	1.88672	0.172235	0.737639
HNRNPH1	0.11441	0.201022	0.0349125	0.347782	-0.233372	-0.14676	-0.31287	0.0866122	-0.0794976	-0.16611	21.9842	1.8836	0.172791	0.739161
TK1	0.271006	0.798098	-0.128255	0.0517118	0.219295	0.746386	-0.179967	0.527092	-0.399261	-0.926353	20.0224	1.88667	0.172856	0.739161
SYF2	0.439585	0.013345	-0.443054	0.0306492	0.408936	-0.0173043	-0.473703	-0.42624	-0.882639	-0.456399	18.2062	1.88183	0.173107	0.739663
RRS1	-0.153803	-0.178106	-0.223131	-0.267025	0.113221	0.0889189	0.043894	-0.0243022	-0.0693272	-0.045025	21.2549	1.88077	0.173297	0.739763
FAF1	0.228488	0.0585018	0.00659537	-0.0385505	0.267038	0.0970522	0.0451458	-0.169986	-0.221893	-0.0519064	20.951	1.88021	0.173397	0.739763
ENY2	-0.264694	-0.637021	-0.63028	-0.0102556	-0.254439	-0.626765	-0.620024	-0.372327	-0.365586	0.00674092	20.361	1.88153	0.173738	0.740653
RPN1	0.0903134	0.147786	0.202262	0.0942909	-0.00397748	0.0534956	0.107971	0.0574731	0.111949	0.0544758	23.5349	1.87668	0.17403	0.74133
NT5DC2	1.11435	-0.0596323	-0.380254	0.0998954	1.01445	-0.159528	-0.48015	-1.17398	-1.4946	-0.320622	18.7961	1.87727	0.174502	0.741871
P4HA1	0.205958	-0.103504	0.0771221	-0.0450376	0.250996	-0.0584664	0.12216	-0.309462	-0.128836	0.180626	21.8562	1.87401	0.174512	0.741871
CCDC9	-0.0161283	-0.0501046	-0.439181	0.0459055	-0.0620338	-0.0960101	-0.485087	-0.0339763	-0.423053	-0.389077	20.2214	1.87225	0.17483	0.741871
ADAM17	-0.0571182	-0.407786	-0.217163	0.0354725	-0.0925907	-0.443259	-0.252636	-0.350668	-0.160045	0.190623	19.1193	1.8713	0.175002	0.741871
PMF1	-0.216945	0.257898	1.24954	0.150353	-0.367298	0.107545	1.09918	0.474843	1.46648	0.991638	18.8171	1.87445	0.175011	0.741871
UROD	-0.146094	-0.00874378	0.226269	-0.257706	0.111613	0.248962	0.483976	0.13735	0.372363	0.235013	20.5884	1.87089	0.175076	0.741871
COL6A3	0.322104	0.354965	1.48461	0.43662	-0.114516	-0.0816544	1.04799	0.0328613	1.16251	1.12965	18.4144	1.8708	0.175092	0.741871
GOLT1B	-1.07878	-2.70385	-1.05884	-0.420309	-0.658467	-2.28354	-0.638536	-1.62507	0.0199317	1.645	17.5471	1.86994	0.175825	0.742573
RRP36	0.0585946	0.0238332	0.387952	0.179463	-0.120869	-0.15563	0.208489	-0.0347614	0.329358	0.364119	19.7585	1.86667	0.175841	0.742573
PAICS	-0.163084	0.0427863	0.00242651	-0.0956774	-0.0674061	0.138464	0.0981039	0.20587	0.16551	-0.0403598	24.0738	1.86629	0.175912	0.742573
CCDC97	-0.52911	-0.512529	-0.602947	0.17045	-0.69956	-0.682979	-0.773397	0.0165808	-0.073837	-0.0904178	17.4335	1.86608	0.17595	0.742573
TTYH3	0.381684	-0.0199919	0.00698179	0.253533	0.128151	-0.273525	-0.246551	-0.401676	-0.374703	0.0269736	21.3095	1.86549	0.176057	0.742573
GART	-0.101284	0.118929	-0.027166	-0.0923685	-0.0089154	0.211297	0.0652024	0.220213	0.0741178	-0.146095	22.2239	1.86548	0.176059	0.742573
POLR2H	-0.348031	-0.22752	0.460209	-0.153574	-0.194457	-0.0739461	0.613783	0.120511	0.80824	0.687729	18.8984	1.86472	0.176197	0.74259
SLC7A1	1.01074	1.4349	2.01001	0.172961	0.837775	1.26194	1.83705	0.424167	0.99927	0.575103	17.7211	1.8631	0.176496	0.742949
MARS1	-0.22636	0.0191229	-0.0278718	-0.221793	-0.00456729	0.240916	0.193921	0.245483	0.198488	-0.0469948	22.0128	1.86247	0.176608	0.742949
UTP20	-0.522389	-0.278486	-0.31897	-0.591366	0.0689765	0.312879	0.272396	0.243903	0.203419	-0.0404837	18.889	1.86206	0.176683	0.742949
WDR61	-0.0779021	0.195659	0.035659	0.0696048	-0.147507	0.126054	-0.0339458	0.273561	0.113561	-0.16	21.8575	1.8606	0.17695	0.74351
TRIM3	0.120319	-1.03939	-1.85606	0.114006	0.00631245	-1.1534	-1.97007	-1.15971	-1.97638	-0.816674	17.1572	1.85869	0.177301	0.743548
NOC3L	-0.11161	-0.109265	-0.151972	-0.271258	0.159648	0.161994	0.119287	0.00234522	-0.0403616	-0.0427068	21.0003	1.85801	0.177425	0.743548
LASP1	0.117004	0.223652	0.266358	0.218453	-0.101449	0.00519919	0.0479052	0.106648	0.149354	0.042706	24.112	1.85783	0.177458	0.743548
NOP58	-0.278253	-0.0715216	-0.171797	-0.224121	-0.054132	0.1526	0.052324	0.206732	0.106456	-0.100276	22.4011	1.85764	0.177494	0.743548
GEMIN4	0.467084	-0.0463348	-0.1737	-0.113444	0.580528	0.0671096	-0.0602561	-0.513418	-0.640784	-0.127366	20.456	1.85604	0.177787	0.743897
PAPSS2	0.179518	-0.0453962	-0.0568677	0.0923603	0.0871581	-0.137757	-0.149228	-0.224915	-0.236386	-0.0114715	21.2832	1.85573	0.177845	0.743897
TUT4	-0.331328	-0.901538	-0.845701	-0.364618	0.0332908	-0.53692	-0.481082	-0.57021	-0.514373	0.0558375	17.5968	1.85344	0.178268	0.744051
IKBIP	-0.0220664	-0.313919	-0.249151	-0.0738105	0.0517441	-0.240108	-0.17534	-0.291852	-0.227084	0.0647679	20.0173	1.85342	0.178271	0.744051
CIAO2A	-0.333609	-0.297778	-0.54509	-0.319394	-0.0142157	0.0216154	-0.225697	0.0358311	-0.211481	-0.247312	19.713	1.8527	0.178403	0.744051
PPP3R1	0.324801	-0.469449	-0.726809	-0.05661	0.381411	-0.412839	-0.670199	-0.794249	-1.05161	-0.257361	17.9534	1.85263	0.178417	0.744051
DPYSL4	1.10738	-0.116266	-0.169902	0.283833	0.823542	-0.400099	-0.453735	-1.22364	-1.27728	-0.0536355	18.5056	1.8519	0.178551	0.744051
MALT1	0.456839	0.0854811	-0.0546453	0.606037	-0.149198	-0.520556	-0.660682	-0.371358	-0.511484	-0.140126	17.7025	1.85017	0.178871	0.74475
SELENOF	-0.286277	-0.0245654	0.359129	-0.146656	-0.139621	0.12209	0.505784	0.261712	0.645406	0.383694	18.9783	1.84955	0.178986	0.74475
STAM	0.216136	0.00448137	0.168595	0.272075	-0.0559389	-0.267594	-0.10348	-0.211655	-0.0475408	0.164114	19.9204	1.84794	0.179286	0.745439
SEPTIN10	-0.141607	0.0542114	0.227088	-0.171866	0.0302597	0.226078	0.398954	0.195818	0.368694	0.172876	20.519	1.8463	0.17959	0.74593
MAOA	-0.170717	1.19493	1.03407	1.99153	-2.16224	-0.796599	-0.957459	1.36564	1.20478	-0.160859	17.8512	1.84897	0.179673	0.74593
MTSS2	0.495677	0.249975	0.643349	1.30015	-0.804475	-1.05018	-0.656803	-0.245702	0.147672	0.393373	15.8341	1.84456	0.179915	0.746379
MSRA	0.694136	0.496021	0.624157	0.0891804	0.604955	0.406841	0.534976	-0.198114	-0.0699787	0.128136	18.8444	1.84372	0.180072	0.746472
CUL3	-0.481731	-0.332396	-0.381246	-0.285741	-0.19599	-0.0466558	-0.0955056	0.149334	0.100485	-0.0488498	19.5395	1.84268	0.180266	0.746721
SNRPC	0.162768	0.296782	0.198591	0.286333	-0.123564	0.0104499	-0.0877414	0.134014	0.035823	-0.0981914	21.3055	1.84064	0.180648	0.747503
PIN4	-0.395861	0.278625	0.377005	-0.179909	-0.215952	0.458535	0.556914	0.674486	0.772866	0.0983793	20.404	1.84332	0.180724	0.747503
ISOC1	-0.0293907	0.21278	-0.0350367	-0.0912608	0.0618701	0.304041	0.0562241	0.242171	-0.00564595	-0.247817	21.159	1.83867	0.181018	0.748164
PPME1	0.155927	0.012852	0.0302225	0.158181	-0.00225357	-0.145329	-0.127959	-0.143075	-0.125705	0.0173704	21.2693	1.83465	0.181775	0.750732
ACTR1B	-0.271799	0.0348892	-0.0855497	-0.0795189	-0.19228	0.114408	-0.00603087	0.306688	0.186249	-0.120439	21.2164	1.83263	0.182155	0.750995
NAPA	0.020198	0.0849042	0.185743	0.268132	-0.247934	-0.183228	-0.0823888	0.0647062	0.165545	0.100839	21.905	1.83077	0.182509	0.750995
UHRF1BP1	-0.198592	0.344227	-0.0683315	0.209325	-0.407916	0.134903	-0.277656	0.542819	0.13026	-0.412559	19.2484	1.8303	0.182598	0.750995
ITGA7	0.0243439	0.726727	0.548242	0.192595	-0.168251	0.534132	0.355647	0.702383	0.523898	-0.178485	17.8408	1.82898	0.182847	0.750995
TYMS	-0.336492	0.12684	-0.248502	-0.155932	-0.18056	0.282772	-0.0925697	0.463332	0.0879906	-0.375342	24.0282	1.83069	0.183054	0.750995
MED4	0.660408	-0.0254421	0.812007	1.24856	-0.588155	-1.27401	-0.436556	-0.68585	0.151599	0.837449	18.2818	1.82707	0.183211	0.750995
EIF4A1	-0.196176	0.127689	-0.00646316	-0.183346	-0.0128298	0.311036	0.176883	0.323866	0.189713	-0.134152	23.6044	1.82631	0.183355	0.750995
SCLY	-0.978443	-0.0388732	-0.481297	-0.564488	-0.413955	0.525615	0.0831912	0.93957	0.497146	-0.442423	17.4397	1.82607	0.1834	0.750995
CCNT2	0.524096	0.31907	-0.163695	0.746735	-0.222639	-0.427665	-0.91043	-0.205025	-0.68779	-0.482765	17.3681	1.82551	0.183508	0.750995
C2orf49	0.217223	-0.48856	-0.5868	-0.261434	0.478657	-0.227126	-0.325367	-0.705783	-0.804023	-0.0982408	19.8097	1.82752	0.183558	0.750995
CDC20	1.22166	1.21529	-0.14387	0.211828	1.00983	1.00346	-0.355697	-0.00637048	-1.36553	-1.35916	17.77	1.82523	0.183562	0.750995
SNX27	0.199988	0.310033	0.63864	0.0961827	0.103805	0.21385	0.542458	0.110045	0.438653	0.328608	20.1391	1.82522	0.183562	0.750995
RPS5	-0.487089	-0.281141	-0.168957	-0.523199	0.0361101	0.242059	0.354242	0.205949	0.318132	0.112184	20.8867	1.82449	0.183702	0.750995
CDAN1	-0.100837	0.429512	0.193395	-0.00904268	-0.0917946	0.438555	0.202437	0.530349	0.294232	-0.236117	18.6886	1.82435	0.18373	0.750995
CCDC47	-0.173496	0.112802	0.26406	-0.0945349	-0.0789607	0.207337	0.358595	0.286298	0.437555	0.151257	20.4885	1.82225	0.184131	0.752081
RALA	-0.0131316	0.121874	0.376861	0.193128	-0.206259	-0.0712535	0.183734	0.135006	0.389993	0.254987	20.2233	1.82097	0.184376	0.752532
UNC13D	0.183226	-0.29242	-0.0416991	0.0876048	0.0956213	-0.380025	-0.129304	-0.475646	-0.224925	0.250721	20.2194	1.81885	0.184781	0.753631
THY1	1.78511	1.08558	1.83766	0.645664	1.13945	0.439917	1.192	-0.699533	0.0525454	0.752079	17.9909	1.81823	0.185126	0.754482
NDE1	0.273231	0.0794254	-0.0605194	0.1901	0.0831307	-0.110675	-0.25062	-0.193806	-0.33375	-0.139945	19.7452	1.81456	0.185607	0.755457
DDAH2	-0.34618	-0.113341	-0.16085	-0.128835	-0.217345	0.015494	-0.0320149	0.232839	0.18533	-0.047509	21.3963	1.81311	0.185887	0.755457
GSTP1	0.106444	-0.0847176	-0.202007	0.0380573	0.0683866	-0.122775	-0.240064	-0.191161	-0.308451	-0.117289	24.6221	1.81212	0.18608	0.755457
LRRC59	-0.0477094	0.106259	0.00658278	-0.0934497	0.0457403	0.199709	0.100032	0.153969	0.0542921	-0.0996766	24.1253	1.81147	0.186206	0.755457
AIMP2	-0.141929	0.132029	0.0634396	-0.0909041	-0.0510252	0.222933	0.154344	0.273958	0.205369	-0.0685894	21.2346	1.81114	0.186268	0.755457
GRSF1	-0.12435	-0.084541	-0.286806	-0.0704993	-0.0538506	-0.0140416	-0.216306	0.0398089	-0.162456	-0.202265	22.0893	1.81094	0.186309	0.755457
OBSL1	-0.115055	1.40682	1.38279	-0.196996	0.0819409	1.60382	1.57978	1.52188	1.49784	-0.024036	18.6408	1.82159	0.186443	0.755457
HTATIP2	-0.0518607	0.210465	0.332538	0.101936	-0.153797	0.108528	0.230602	0.262325	0.384399	0.122073	20.1261	1.8102	0.186452	0.755457
MRPL18	-0.154088	-0.37479	-0.759305	-0.208749	0.0546605	-0.166041	-0.550556	-0.220702	-0.605217	-0.384515	20.2543	1.81072	0.186627	0.755614
PDCD5	0.319263	-0.173408	-0.207175	0.376292	-0.0570298	-0.549701	-0.583468	-0.492671	-0.526438	-0.033767	21.663	1.81245	0.186852	0.755974
RPL12	0.13471	0.155148	-0.0726238	-0.0407359	0.175446	0.195883	-0.031888	0.0204373	-0.207334	-0.227771	24.9542	1.80532	0.1874	0.757305
UBE2I	0.200411	-0.156809	-0.303539	0.0266214	0.173789	-0.18343	-0.330161	-0.35722	-0.50395	-0.14673	23.0587	1.80518	0.187563	0.757305
SNX12	0.264169	-0.0565456	-0.0279144	0.106942	0.157226	-0.163488	-0.134857	-0.320714	-0.292083	0.0286312	21.9075	1.80435	0.187589	0.757305
UBE2D3	0.714327	0.62866	0.418805	0.331411	0.382916	0.297249	0.0873939	-0.0856676	-0.295522	-0.209855	22.9033	1.81161	0.188117	0.758709
IPO9	-0.174931	0.0263297	0.0129444	-0.240015	0.0650841	0.266345	0.25296	0.201261	0.187876	-0.0133853	21.8812	1.80116	0.188214	0.758709
RAVER1	-0.130942	-0.491677	-0.173548	-0.168379	0.0374366	-0.323298	-0.0051687	-0.360734	-0.0426053	0.318129	19.2845	1.80019	0.188404	0.758709
ARHGAP12	0.233767	-1.45074	0.148206	0.00437506	0.229392	-1.45512	0.143831	-1.68451	-0.0855614	1.59895	17.4473	1.79936	0.188566	0.758709
SRP54	-0.135053	0.202635	0.0623307	0.0155929	-0.150646	0.187042	0.0467378	0.337688	0.197384	-0.140304	19.9022	1.79909	0.188619	0.758709
FADS2	0.214479	-0.185836	-0.100187	0.232984	-0.0185043	-0.41882	-0.33317	-0.400316	-0.314666	0.0856494	21.5043	1.79659	0.189111	0.760137
EPHX2	-0.809729	0.326823	-0.426153	-0.362018	-0.447711	0.688841	-0.0641352	1.13655	0.383576	-0.752977	18.1788	1.79587	0.189254	0.76016
ALDH18A1	0.0660405	-0.0992047	-0.207695	-0.0905386	0.156579	-0.00866613	-0.117156	-0.165245	-0.273735	-0.10849	22.5051	1.79118	0.19018	0.763318
SYNGR3	0.0722566	0.778301	2.46839	1.5012	-1.42894	-0.722897	0.967194	0.706045	2.39614	1.69009	18.6264	1.80829	0.190347	0.763318
NUSAP1	-0.0445516	0.00689144	-0.405235	0.223987	-0.268539	-0.217096	-0.629222	0.0514431	-0.360683	-0.412126	19.6763	1.78981	0.190452	0.763318
ABCF2	0.0541203	-0.19203	-0.174994	0.111349	-0.0572289	-0.303379	-0.286343	-0.24615	-0.229114	0.0170363	20.1171	1.78661	0.191089	0.765318
PGM2	-0.341909	-0.0790103	-0.179957	-0.377748	0.0358395	0.298738	0.197791	0.262898	0.161951	-0.100947	21.4042	1.78256	0.191896	0.76739
KLC2	-0.0373499	0.239649	0.145078	0.0255836	-0.0629335	0.214065	0.119495	0.276999	0.182428	-0.0945707	21.1169	1.78231	0.191947	0.76739
FHL1	-0.202008	0.0599532	-0.102216	-0.277751	0.075743	0.337704	0.175535	0.261961	0.0997922	-0.162169	20.4067	1.78003	0.192403	0.76739
RO60	-0.395158	-1.3689	-0.978771	-1.34672	0.951558	-0.0221805	0.367945	-0.973738	-0.583613	0.390125	17.8538	1.77979	0.192451	0.76739
H1-1	0.770828	-0.250765	0.149759	0.393517	0.377311	-0.644282	-0.243758	-1.02159	-0.621069	0.400524	22.991	1.79748	0.192484	0.76739
SLTM	0.199609	-0.098381	-0.113975	0.0828986	0.11671	-0.18128	-0.196874	-0.29799	-0.313584	-0.0155942	21.6065	1.77928	0.192554	0.76739
PSMB8	-0.471942	-0.159979	-0.136519	-0.439451	-0.0324913	0.279472	0.302932	0.311963	0.335423	0.0234601	20.8956	1.77919	0.192572	0.76739
CUX1	0.150936	-0.0264176	-0.0112012	0.355424	-0.204488	-0.381842	-0.366625	-0.177353	-0.162137	0.0152164	19.0204	1.77809	0.192792	0.767716
CLEC16A	-0.536825	0.899865	-0.157285	1.15523	-1.69206	-0.255367	-1.31252	1.43669	0.379541	-1.05715	15.903	1.77526	0.193363	0.769107
SUSD5	0.412803	-0.198799	0.366409	-0.501098	0.913902	0.3023	0.867507	-0.611602	-0.0463945	0.565207	15.8061	1.77499	0.193418	0.769107
NAPG	-0.171648	0.146479	0.0468425	-0.0501501	-0.121498	0.196629	0.0969925	0.318126	0.21849	-0.0996361	21.3593	1.77362	0.193694	0.769175
VAPB	-0.189619	0.00424242	0.00626028	0.000728846	-0.190348	0.00351357	0.00553143	0.193862	0.19588	0.00201786	21.5322	1.77317	0.193786	0.769175
RAB21	-0.214754	0.0300616	0.0858857	-0.213035	-0.0017188	0.243096	0.298921	0.244815	0.300639	0.0558241	21.0085	1.77247	0.193926	0.769175
SPPL2B	-0.452204	-0.218477	0.303935	0.593227	-1.04543	-0.811704	-0.289292	0.233728	0.756139	0.522412	16.156	1.77216	0.193989	0.769175
ETFB	-0.0636802	0.0177413	-0.123899	0.0619847	-0.125665	-0.0442434	-0.185884	0.0814215	-0.0602191	-0.141641	24.0252	1.77067	0.194292	0.769827
ANKLE2	0.44707	0.0768538	-0.0178774	0.39237	0.0546997	-0.315516	-0.410247	-0.370216	-0.464947	-0.0947312	18.3703	1.76838	0.194757	0.77112
VDAC1	0.177298	0.0645588	0.0495436	0.124577	0.0527208	-0.0600186	-0.0750338	-0.112739	-0.127755	-0.0150152	22.6689	1.76711	0.195016	0.77141
MRPS34	-0.0555923	-0.0118429	0.252428	-0.132033	0.0764408	0.12019	0.384462	0.0437494	0.308021	0.264271	21.0356	1.76659	0.19512	0.77141
LANCL1	-0.201951	-0.00933304	-0.0685351	-0.188497	-0.0134535	0.179164	0.119962	0.192618	0.133416	-0.059202	21.5293	1.76553	0.195337	0.77141
CLTC	0.0975948	0.128873	0.182671	0.00717845	0.0904164	0.121694	0.175493	0.0312779	0.0850764	0.0537985	24.6754	1.7643	0.195588	0.77141
SUPV3L1	-0.605962	-0.511254	-0.323872	-0.27518	-0.330782	-0.236073	-0.048692	0.0947082	0.28209	0.187381	19.6463	1.76395	0.19566	0.77141
CTDP1	0.734897	-0.0140231	0.0721262	0.404593	0.330305	-0.418616	-0.332467	-0.748921	-0.662771	0.0861493	18.598	1.76393	0.195663	0.77141
ATP6V1E1	0.0970088	0.00928692	0.164282	0.20756	-0.110551	-0.198273	-0.0432777	-0.0877219	0.0672736	0.154995	21.8878	1.7631	0.195834	0.771539
PCIF1	-1.54651	-1.06496	-1.02001	-1.07158	-0.474933	0.00661443	0.0515719	0.481547	0.526505	0.0449575	17.9686	1.7616	0.196139	0.771887
CRACD	-0.985303	-0.72213	0.251242	-0.3407	-0.644603	-0.38143	0.591941	0.263173	1.23654	0.973371	17.5112	1.76131	0.1962	0.771887
ELFN2	-0.0670038	-0.766536	-1.1945	-0.851074	0.78407	0.0845379	-0.343426	-0.699532	-1.1275	-0.427964	17.7934	1.76004	0.19646	0.772363
CDC42SE2	0.35403	-0.0801484	1.08478	0.380765	-0.0267348	-0.460914	0.704019	-0.434179	0.730754	1.16493	18.0764	1.75917	0.196638	0.772517
SLC4A2	0.485026	-0.729416	-0.00431548	-0.280073	0.765099	-0.449343	0.275757	-1.21444	-0.489341	0.7251	16.6522	1.75732	0.19702	0.772559
PAM16	-0.00383373	0.128478	1.21193	-0.0752004	0.0713667	0.203679	1.28713	0.132312	1.21576	1.08345	18.7895	1.75841	0.197366	0.772559
ANXA5	-0.025293	-0.00235934	0.118707	-0.0160831	-0.00920996	0.0137237	0.13479	0.0229337	0.144	0.121066	26.2854	1.75515	0.197467	0.772559
MTIF2	-0.749106	-0.697549	-0.682393	-0.567733	-0.181373	-0.129816	-0.11466	0.0515569	0.0667124	0.0151555	18.3382	1.75353	0.197802	0.772559
CDC26	0.133593	0.0195413	0.111374	1.29092	-1.15733	-1.27138	-1.17955	-0.114052	-0.0222191	0.0918329	18.8707	1.75627	0.197807	0.772559
UBAP2	-0.196965	-0.244825	-0.28261	0.0921923	-0.289158	-0.337018	-0.374802	-0.0478599	-0.0856443	-0.0377844	20.8539	1.75311	0.197889	0.772559
CDKAL1	0.110229	0.641666	-0.232741	0.280576	-0.170347	0.36109	-0.513317	0.531437	-0.34297	-0.874407	18.637	1.75305	0.197901	0.772559
HS1BP3	0.146626	0.18594	0.327033	0.121882	0.0247439	0.0640578	0.205152	0.0393139	0.180408	0.141094	21.3229	1.75282	0.197947	0.772559
UPF1	-0.106589	-0.124692	-0.227454	-0.200249	0.0936599	0.0755569	-0.0272044	-0.0181031	-0.120864	-0.102761	21.6334	1.75197	0.198125	0.772559
ABR	-0.0110484	-1.26564	-0.361034	-1.66617	1.65512	0.400527	1.30513	-1.25459	-0.349986	0.904606	16.9417	1.75191	0.198137	0.772559
BMS1	-0.185967	0.048331	-0.0856141	-0.038625	-0.147342	0.0869561	-0.046989	0.234298	0.100353	-0.133945	21.0471	1.75171	0.198178	0.772559
VPS28	-0.489824	-0.678696	-0.760075	-0.507722	0.0178978	-0.170974	-0.252353	-0.188872	-0.270251	-0.0813785	19.0948	1.74999	0.198535	0.772812
GLMN	1.26268	0.686323	-0.239711	0.62576	0.636916	0.0605629	-0.86547	-0.576353	-1.50239	-0.926033	16.5836	1.74831	0.198883	0.772812
EFNB1	0.206699	0.0432763	-0.385766	0.0800313	0.126668	-0.036755	-0.465797	-0.163423	-0.592465	-0.429042	18.7993	1.74812	0.198922	0.772812
ELOC	0.376179	0.226362	0.0404693	0.198972	0.177207	0.0273901	-0.158502	-0.149817	-0.33571	-0.185892	20.1284	1.74812	0.198923	0.772812
STAT2	0.138328	0.0415411	-0.236821	0.37213	-0.233803	-0.330589	-0.608951	-0.0967865	-0.375148	-0.278362	18.6678	1.74805	0.198938	0.772812
GNPNAT1	0.0970525	0.0942825	0.750165	0.0233582	0.0736943	0.0709243	0.726806	-0.00276996	0.653112	0.655882	21.1059	1.75094	0.199659	0.77456
CETN2	0.39539	0.0197002	-0.126683	0.636282	-0.240892	-0.616582	-0.762965	-0.37569	-0.522074	-0.146384	18.5142	1.74377	0.19983	0.77456
RPIA	0.132324	-0.310434	-0.41186	-0.23701	0.369334	-0.0734233	-0.17485	-0.442757	-0.544183	-0.101426	19.9147	1.74374	0.199837	0.77456
FEN1	0.142384	0.131307	0.150517	0.201458	-0.0590738	-0.0701515	-0.050941	-0.0110777	0.00813277	0.0192105	23.8125	1.74322	0.199945	0.77456
PRKCA	0.0620161	0.0632404	0.305344	-0.067354	0.12937	0.130594	0.372698	0.00122431	0.243328	0.242104	19.9263	1.74208	0.200185	0.774594
PCNP	-0.0059155	0.0309689	-0.0658915	0.206539	-0.212454	-0.17557	-0.27243	0.0368844	-0.059976	-0.0968604	22.3269	1.73997	0.200627	0.774594
ATG9A	-0.0286341	-0.22412	-0.313287	0.0522395	-0.0808736	-0.276359	-0.365527	-0.195486	-0.284653	-0.0891672	19.9331	1.73934	0.200759	0.774594
CYFIP1	0.0456552	0.0641154	0.242055	-0.0753979	0.121053	0.139513	0.317453	0.0184601	0.1964	0.17794	21.2732	1.73838	0.20096	0.774594
STK38	0.40975	-0.0282805	-0.317504	-0.0304728	0.440223	0.00219238	-0.287032	-0.43803	-0.727254	-0.289224	18.0653	1.73787	0.201068	0.774594
DOCK6	0.894689	-0.92058	0.422399	0.219549	0.67514	-1.14013	0.20285	-1.81527	-0.47229	1.34298	16.5594	1.73675	0.201303	0.774594
GATAD2A	0.243154	0.21142	0.245843	0.428184	-0.185031	-0.216764	-0.182341	-0.0317338	0.00268967	0.0344235	19.7705	1.73633	0.201393	0.774594
SLC7A6	0.992582	-0.467766	0.260783	0.323081	0.669501	-0.790846	-0.0622972	-1.46035	-0.731798	0.728549	16.4006	1.73551	0.201565	0.774594
GPAT4	-0.720167	-0.553247	0.475082	-0.697706	-0.022461	0.144459	1.17279	0.16692	1.19525	1.02833	18.2523	1.73485	0.201706	0.774594
OXSR1	-0.289358	0.00987064	-0.113234	0.0467867	-0.336145	-0.0369161	-0.160021	0.299229	0.176124	-0.123105	21.898	1.73479	0.201718	0.774594
NUF2	-0.167563	0.159241	0.054636	0.0952712	-0.262834	0.0639698	-0.0406351	0.326804	0.222199	-0.104605	19.4266	1.73468	0.201741	0.774594
RBBP4	-0.0285007	0.0850975	0.395195	0.0847862	-0.113287	0.000311312	0.310409	0.113598	0.423696	0.310098	23.1661	1.73448	0.201783	0.774594
PARVA	0.0188609	0.148027	0.300885	-0.000807938	0.0196688	0.148835	0.301693	0.129166	0.282024	0.152858	20.1666	1.73429	0.201822	0.774594
ADPRS	-0.259555	-0.0741924	-0.116245	-0.161245	-0.0983096	0.0870529	0.0450006	0.185362	0.14331	-0.0420523	20.8525	1.7315	0.202413	0.774594
COA3	0.0892617	-0.193689	-0.232762	0.369132	-0.27987	-0.56282	-0.601893	-0.28295	-0.322023	-0.0390732	20.1597	1.73143	0.202428	0.774594
SENP5	0.792828	1.08848	0.897926	0.764402	0.0284263	0.324083	0.133524	0.295656	0.105098	-0.190559	15.6114	1.73084	0.202553	0.774594
POLR2C	-0.0776652	0.189974	-0.0116862	-0.0374913	-0.040174	0.227465	0.025805	0.267639	0.065979	-0.20166	21.3159	1.7307	0.202582	0.774594
CORO1A	-0.0902485	-0.618292	-0.212682	-0.0189697	-0.0712788	-0.599322	-0.193712	-0.528044	-0.122433	0.405611	18.5099	1.73067	0.202589	0.774594
ACYP1	-0.226235	-0.438877	0.126364	0.206736	-0.432971	-0.645613	-0.0803723	-0.212642	0.352599	0.565241	19.1693	1.73061	0.202601	0.774594
SEZ6L2	0.827673	0.270682	0.264257	-0.0280256	0.855698	0.298708	0.292282	-0.55699	-0.563416	-0.00642589	19.0931	1.72916	0.202909	0.775239
MAX	0.217689	-0.0337828	-0.318121	0.708089	-0.4904	-0.741872	-1.02621	-0.251472	-0.535811	-0.284338	20.2281	1.7339	0.203447	0.775304
FNDC3A	0.603254	0.231973	0.289524	0.669639	-0.0663857	-0.437666	-0.380115	-0.37128	-0.31373	0.0575505	18.7496	1.72591	0.203603	0.775304
STX12	0.290862	-0.345847	0.0559045	0.377108	-0.0862461	-0.722956	-0.321204	-0.63671	-0.234958	0.401752	20.2092	1.7267	0.203656	0.775304
PDCD10	-0.0954484	0.0181165	0.176008	-0.000921144	-0.0945272	0.0190377	0.176929	0.113565	0.271457	0.157892	20.7875	1.72511	0.203772	0.775304
ARL1	-0.360473	0.137752	0.0492722	0.17026	-0.530733	-0.0325072	-0.120987	0.498226	0.409746	-0.0884802	19.3589	1.72495	0.203806	0.775304
CWF19L1	0.132727	0.215643	0.230117	-0.0516714	0.184398	0.267314	0.281789	0.0829159	0.0973905	0.0144745	19.86	1.72493	0.20381	0.775304
COX4I1	-0.124428	-0.00810195	-0.133829	-0.0251979	-0.0992302	0.0170959	-0.108631	0.116326	-0.00940126	-0.125727	23.8157	1.72387	0.204037	0.775304
SEPTIN9	0.113653	0.154223	0.120986	0.122054	-0.00840097	0.032169	-0.00106845	0.04057	0.00733252	-0.0332374	23.0125	1.7222	0.204394	0.775304
GNS	-0.120248	0.0909845	0.00884157	-0.0374966	-0.0827515	0.128481	0.0463381	0.211233	0.12909	-0.082143	21.5659	1.72123	0.204603	0.775304
SAP130	0.1818	0.147005	0.264331	0.171709	0.0100905	-0.0247045	0.0926225	-0.034795	0.0825319	0.117327	20.4959	1.72031	0.204801	0.775304
RAP1GDS1	-0.290001	-0.132951	-0.090869	-0.101035	-0.188966	-0.0319167	0.0101658	0.157049	0.199132	0.0420825	20.4889	1.71898	0.205087	0.775304
POLR2I	0.081958	-1.37861	-1.8288	-0.85621	0.938168	-0.522399	-0.97259	-1.46057	-1.91076	-0.450191	17.4968	1.71819	0.205256	0.775304
FXR1	-0.181808	0.057881	0.00718781	-0.00904662	-0.172761	0.0669276	0.0162344	0.239689	0.188996	-0.0506932	21.979	1.71645	0.20563	0.775304
CCDC28A	-1.12435	-0.0322064	-0.3999	-0.0605528	-1.06379	0.0283464	-0.339347	1.09214	0.724447	-0.367693	16.2266	1.71615	0.205696	0.775304
TSTA3	0.140654	0.182594	-0.0770001	-0.119417	0.26007	0.302011	0.0424164	0.0419407	-0.217654	-0.259595	22.1753	1.71572	0.205789	0.775304
SUMO2	-1.70367	0.177853	-2.7802	-2.70532	1.00165	2.88317	-0.074881	1.88152	-1.07653	-2.95805	18.782	1.74371	0.205851	0.775304
ASAH1	-0.0631064	0.307815	1.55262	0.244878	-0.307985	0.0629365	1.30774	0.370921	1.61573	1.24481	19.3481	1.73032	0.20589	0.775304
MCCC1	0.00382989	0.282945	0.0841118	0.170632	-0.166802	0.112312	-0.0865206	0.279115	0.0802819	-0.198833	20.1142	1.71483	0.205981	0.775304
RAB6B	0.298682	0.381068	0.322792	0.379814	-0.0811327	0.00125356	-0.0570227	0.0823863	0.02411	-0.0582763	19.8226	1.71418	0.206121	0.775304
ERGIC1	-0.456946	-0.484303	-0.428433	-0.500969	0.0440228	0.0166654	0.0725357	-0.0273574	0.028513	0.0558704	19.6673	1.71414	0.206129	0.775304
NANS	-0.179557	-0.0457254	-0.0853294	-0.245835	0.0662781	0.20011	0.160506	0.133831	0.0942275	-0.039604	21.4227	1.71369	0.206226	0.775304
RPP30	0.16143	1.44881	-0.497229	0.996035	-0.834604	0.452778	-1.49326	1.28738	-0.65866	-1.94604	17.2589	1.71259	0.206465	0.775304
TDRD5	1.63347	2.42597	2.46799	-0.19691	1.83038	2.62288	2.6649	0.792497	0.834521	0.0420243	18.4164	1.72847	0.20657	0.775304
NRAS	0.341798	0.275669	0.806904	-0.0294054	0.371203	0.305074	0.836309	-0.0661289	0.465106	0.531235	20.3991	1.71608	0.2066	0.775304
FBXO3	-1.12887	0.0219188	-0.666158	-0.654033	-0.474841	0.675952	-0.0121246	1.15079	0.462716	-0.688077	17.9047	1.71186	0.206623	0.775304
C2CD5	-0.11616	0.0550899	-0.344742	-0.255842	0.139682	0.310932	-0.0889001	0.17125	-0.228582	-0.399832	19.8095	1.71175	0.206647	0.775304
COPZ1	0.09558	0.219737	0.109298	0.132452	-0.0368716	0.0872859	-0.0231538	0.124158	0.0137178	-0.11044	21.8946	1.71154	0.206692	0.775304
IDH1	0.0911959	0.17315	0.230679	0.197711	-0.106515	-0.0245613	0.0329682	0.081954	0.139484	0.0575295	23.1599	1.70903	0.207238	0.77676
EEF1E1	0.122214	0.262061	-0.128669	-0.234473	0.356687	0.496534	0.105804	0.139847	-0.250883	-0.39073	20.3686	1.70815	0.207429	0.77676
GGCX	0.356689	0.177165	0.302114	-0.0157525	0.372441	0.192917	0.317867	-0.179524	-0.0545748	0.12495	20.1437	1.70763	0.207543	0.77676
HINT3	0.465226	0.411388	0.562264	0.837801	-0.372575	-0.426413	-0.275538	-0.0538379	0.0970377	0.150876	18.21	1.70718	0.207639	0.77676
HSP90AA4P	0.510568	0.421735	0.293093	-0.372766	0.883334	0.794501	0.665859	-0.088833	-0.217476	-0.128643	21.6084	1.71854	0.208004	0.777339
TMBIM1	0.290786	-0.0969866	0.73218	0.281342	0.00944348	-0.378329	0.450838	-0.387772	0.441394	0.829167	18.6315	1.70356	0.208431	0.777339
ATAD1	0.0221755	-1.156	-2.65254	-2.50073	2.52291	1.34474	-0.151806	-1.17817	-2.67471	-1.49654	18.5181	1.72162	0.208463	0.777339
PSME3	-0.433179	-0.263919	-0.411798	-0.294518	-0.138661	0.0305988	-0.117281	0.16926	0.0213803	-0.14788	20.4633	1.70299	0.208555	0.777339
PRDX5	0.00575389	-0.165176	-0.139405	0.102637	-0.0968827	-0.267813	-0.242041	-0.17093	-0.145159	0.0257714	24.2799	1.70252	0.208657	0.777339
CCDC110	-0.00693154	-0.517713	-0.536907	-1.16851	1.16158	0.650796	0.631602	-0.510782	-0.529975	-0.0191937	16.6678	1.70242	0.20868	0.777339
LRRC40	-0.164878	-0.0152516	-0.236964	-0.0779152	-0.0869627	0.0626636	-0.159048	0.149626	-0.0720858	-0.221712	20.1158	1.70168	0.208842	0.777339
SLC7A11	-0.554	-0.445809	-0.605578	-0.969976	0.415975	0.524166	0.364398	0.108191	-0.0515773	-0.159769	18.6616	1.70136	0.208912	0.777339
PHB	-0.0410309	0.057445	-0.026279	-0.12468	0.0836488	0.182125	0.0984008	0.098476	0.014752	-0.083724	24.2465	1.6987	0.209496	0.778989
MSI1	0.59063	-0.306307	-0.088268	-0.493423	1.08405	0.187117	0.405155	-0.896937	-0.678898	0.218038	16.2886	1.69712	0.209845	0.779766
PSMD8	-0.545191	-0.410162	-0.556104	-0.472386	-0.0728046	0.0622239	-0.0837177	0.135029	-0.0109131	-0.145942	21.1792	1.69617	0.210215	0.779927
TIMM50	-0.329288	0.0194291	-0.124145	-0.279089	-0.0501997	0.298518	0.154944	0.348718	0.205143	-0.143574	20.4737	1.69513	0.210283	0.779927
AP1S1	-0.134965	-0.164197	0.0104354	0.160745	-0.29571	-0.324942	-0.15031	-0.0292318	0.1454	0.174632	19.9309	1.69501	0.21031	0.779927
SUPT16H	-0.163828	-0.00648842	0.0428414	-0.0419073	-0.121921	0.0354189	0.0847488	0.15734	0.20667	0.0493298	21.711	1.69369	0.210602	0.78049
WDR82	0.115163	-0.141247	-0.296986	-0.113938	0.229102	-0.0273088	-0.183048	-0.25641	-0.41215	-0.155739	21.5266	1.69207	0.21096	0.781298
NOP14	-0.156372	-0.0879284	-0.00827142	-0.236256	0.0798838	0.148327	0.227984	0.0684437	0.148101	0.079657	20.0431	1.69126	0.211141	0.781448
CABIN1	0.428897	0.216912	1.2979	0.442104	-0.0132063	-0.225191	0.855799	-0.211985	0.869006	1.08099	16.7858	1.69035	0.211343	0.781673
AP1G1	0.0630189	-0.0478191	1.24925	0.0379519	0.025067	-0.0857709	1.2113	-0.110838	1.18623	1.29707	18.7696	1.69175	0.211596	0.782089
PLXNA1	0.359155	0.726344	-0.103969	-0.309876	0.669032	1.03622	0.205908	0.367189	-0.463124	-0.830313	19.3586	1.6911	0.211741	0.782107
ECD	0.450378	-0.504355	1.07015	-0.540766	0.991144	0.0364108	1.61091	-0.954733	0.619768	1.5745	17.4246	1.68609	0.21229	0.782571
NBAS	-0.2646	0.23521	0.141327	0.052123	-0.316723	0.183087	0.0892043	0.49981	0.405927	-0.0938827	18.3123	1.68568	0.212383	0.782571
MPHOSPH10	-0.288382	-0.400098	-0.383276	-0.441456	0.153074	0.0413575	0.05818	-0.111717	-0.0948942	0.0168225	19.2935	1.68563	0.212394	0.782571
WDR48	-0.383439	-0.49134	-0.710905	-0.481264	0.097825	-0.0100755	-0.229641	-0.1079	-0.327465	-0.219565	18.8063	1.68499	0.212537	0.782571
PRAF2	0.268597	0.175728	-0.00165093	0.346974	-0.078377	-0.171246	-0.348625	-0.0928686	-0.270248	-0.177379	22.0496	1.68483	0.212571	0.782571
UBXN7	-0.119885	0.0998539	-0.146905	0.166752	-0.286638	-0.0668985	-0.313657	0.219739	-0.0270195	-0.246759	19.6873	1.68179	0.213252	0.784557
LMNB2	0.0272304	-0.151187	-0.12439	-0.0594007	0.0866311	-0.0917861	-0.0649891	-0.178417	-0.15162	0.0267971	23.918	1.68009	0.213635	0.784594
JMJD6	-0.151654	0.0430008	0.517284	-0.115003	-0.036651	0.158004	0.632287	0.194655	0.668938	0.474283	19.3063	1.67975	0.21371	0.784594
YKT6	0.61716	-0.00669679	0.0758774	-0.110212	0.727372	0.103515	0.18609	-0.623857	-0.541282	0.0825742	19.1691	1.6786	0.213968	0.784594
PPP3CA	0.377494	0.00242706	0.0614545	0.0958003	0.281693	-0.0933733	-0.0343458	-0.375067	-0.316039	0.0590275	21.4305	1.67823	0.214052	0.784594
GCLM	0.00440446	-0.0614022	-0.333609	-0.0379498	0.0423542	-0.0234524	-0.295659	-0.0658067	-0.338013	-0.272206	20.0912	1.67621	0.214507	0.784594
SRSF2	-0.0086936	0.131139	-0.160118	0.119482	-0.128175	0.011657	-0.279599	0.139832	-0.151424	-0.291256	23.4706	1.67618	0.214514	0.784594
DNAJB11	0.0965216	0.0090274	0.141313	0.215011	-0.11849	-0.205984	-0.0736979	-0.0874942	0.0447918	0.132286	22.0947	1.67541	0.214689	0.784594
NTPCR	-0.157295	-0.0216419	-0.364475	-0.262097	0.104802	0.240455	-0.102378	0.135653	-0.20718	-0.342833	21.0137	1.675	0.214781	0.784594
DNAJC21	-0.0761281	0.186348	0.621774	0.00706071	-0.0831888	0.179288	0.614713	0.262476	0.697902	0.435425	18.2896	1.67483	0.21482	0.784594
IMPDH2	-0.028139	-0.0202886	-0.156329	-0.0954677	0.0673287	0.0751792	-0.060861	0.00785043	-0.12819	-0.13604	24.2429	1.67447	0.214901	0.784594
SLC30A7	0.00224487	-1.46712	-1.375	-0.320267	0.322512	-1.14685	-1.05473	-1.46937	-1.37724	0.0921241	16.7875	1.67423	0.214954	0.784594
SV2A	0.00716128	-0.220099	0.241233	0.0468705	-0.0397092	-0.26697	0.194363	-0.227261	0.234072	0.461332	20.7637	1.67395	0.215019	0.784594
GCC1	0.461545	0.513609	1.5432	0.389854	0.0716908	0.123755	1.15334	0.0520643	1.08165	1.02959	16.9363	1.6736	0.215096	0.784594
NAA10	-0.248816	0.0643163	-0.121602	-0.0440728	-0.204743	0.108389	-0.0775296	0.313132	0.127214	-0.185919	20.1812	1.66775	0.216426	0.788926
PPP1R14B	0.344474	0.099488	-0.343815	0.412114	-0.0676401	-0.312626	-0.755929	-0.244986	-0.688289	-0.443303	20.8967	1.6674	0.217386	0.790909
MTX3	-0.991874	-1.05768	-1.08162	-1.2425	0.250631	0.184824	0.16088	-0.0658067	-0.0897509	-0.0239442	16.9432	1.66326	0.21745	0.790909
CKB	0.062913	0.00614848	0.304554	0.0702664	-0.00735342	-0.0641179	0.234288	-0.0567645	0.241641	0.298406	19.7213	1.66279	0.217559	0.790909
GNA12	-0.77852	-1.16296	-0.728276	0.232829	-1.01135	-1.39579	-0.961105	-0.384442	0.050244	0.434686	16.8356	1.66252	0.21762	0.790909
KIF5C	0.0907817	-0.137541	0.772686	0.124649	-0.0338677	-0.26219	0.648037	-0.228323	0.681904	0.910227	18.14	1.66226	0.217681	0.790909
MAGT1	0.147524	0.0230831	0.275169	-0.134574	0.282098	0.157657	0.409742	-0.124441	0.127645	0.252086	21.2798	1.66053	0.218077	0.791827
PPP4R3A	0.19397	-0.138237	1.09375	-0.0150631	0.209033	-0.123174	1.10882	-0.332207	0.899783	1.23199	18.0223	1.65776	0.218714	0.792831
PPIC	0.0830844	-0.274639	-0.159572	-0.00598391	0.0890683	-0.268655	-0.153588	-0.357723	-0.242656	0.115067	20.324	1.65774	0.218719	0.792831
DIS3L	0.0822229	-0.259132	0.674662	-0.157485	0.239708	-0.101648	0.832147	-0.341355	0.592439	0.933795	16.0538	1.65747	0.218781	0.792831
SART3	0.000107599	0.182725	0.152232	-0.0760919	0.0761995	0.258816	0.228324	0.182617	0.152124	-0.0304927	19.7403	1.65668	0.218963	0.792974
TXNDC5	0.121116	0.041682	0.0473636	0.207549	-0.0864327	-0.165867	-0.160186	-0.0794345	-0.0737528	0.00568165	22.4066	1.6559	0.219143	0.79311
DDX47	-0.133104	0.0524708	-0.0840475	-0.157362	0.0242574	0.209832	0.0733141	0.185575	0.0490567	-0.136518	21.84	1.65479	0.2194	0.793525
IRS1	0.130485	-0.227565	-0.347135	0.0412745	0.0892105	-0.268839	-0.38841	-0.35805	-0.47762	-0.119571	19.3452	1.65211	0.220021	0.795137
INTS3	-0.0951463	0.235798	1.57056	-0.0306793	-0.064467	0.266478	1.60124	0.330945	1.66571	1.33476	19.3626	1.66628	0.22023	0.795137
ANP32E	-0.0326577	-0.0010453	0.0655584	0.233568	-0.266226	-0.234613	-0.16801	0.0316124	0.0982161	0.0666037	21.4156	1.65099	0.22028	0.795137
TM9SF4	-0.00170064	0.186052	0.125173	-0.24412	0.242419	0.430172	0.369293	0.187753	0.126873	-0.0608795	19.9859	1.6504	0.220418	0.795137
NNMT	0.266054	-0.0913364	0.14758	-0.0411165	0.30717	-0.0502199	0.188696	-0.35739	-0.118474	0.238916	23.3603	1.64885	0.220778	0.79517
HTATSF1	0.197464	0.600968	-0.00607187	0.206038	-0.00857368	0.39493	-0.21211	0.403504	-0.203536	-0.60704	19.1831	1.64868	0.220818	0.79517
RFX5	0.21342	-0.132099	1.15969	-0.112052	0.325472	-0.0200471	1.27174	-0.345519	0.946268	1.29179	18.2222	1.64761	0.221067	0.79517
CCT3	-0.158069	0.0136071	-0.00213717	-0.106196	-0.0518727	0.119803	0.104059	0.171676	0.155931	-0.0157443	24.3902	1.64753	0.221086	0.79517
NME3	0.706321	-0.228508	-0.366479	-0.323477	1.0298	0.0949691	-0.0430022	-0.934829	-1.0728	-0.137971	20.6082	1.6606	0.221276	0.79517
RALYL	0.671049	-0.315235	-0.180514	-0.0614111	0.73246	-0.253824	-0.119103	-0.986284	-0.851564	0.134721	20.5905	1.65489	0.221562	0.79517
CACNA2D1	-0.0395821	0.000700634	0.132821	-0.322816	0.283234	0.323517	0.455637	0.0402827	0.172403	0.13212	19.7968	1.6447	0.221746	0.79517
NDRG1	0.0962263	0.0412525	0.618761	0.138236	-0.0420094	-0.0969831	0.480526	-0.0549738	0.522535	0.577509	22.0307	1.64838	0.221762	0.79517
SOD2	-0.0225888	0.0945879	-0.112419	0.00740231	-0.0299911	0.0871856	-0.119821	0.117177	-0.0898303	-0.207007	22.1202	1.6444	0.221816	0.79517
TRIM47	0.00364904	-0.561264	-0.647997	-0.288153	0.291802	-0.273112	-0.359844	-0.564914	-0.651646	-0.0867329	18.4799	1.64422	0.221858	0.79517
CNDP2	-0.0871139	0.0683294	0.0390488	0.00441264	-0.0915265	0.0639167	0.0346362	0.155443	0.126163	-0.0292805	23.651	1.64343	0.222042	0.795318
OTUB1	-0.144816	-0.26208	-0.309615	-0.173765	0.0289491	-0.0883152	-0.13585	-0.117264	-0.164799	-0.047535	21.1624	1.64107	0.222597	0.795448
ARHGAP17	-0.00300959	-0.416683	-0.501766	-0.241264	0.238254	-0.175419	-0.260502	-0.413674	-0.498756	-0.0850824	20.3793	1.64055	0.222718	0.795448
TOR1AIP1	0.149922	0.0793593	0.24963	0.0614928	0.0884296	0.0178665	0.188138	-0.0705631	0.0997081	0.170271	21.8654	1.63931	0.223009	0.795448
APPL2	-0.00907576	-0.170936	-0.130709	0.477454	-0.48653	-0.64839	-0.608164	-0.16186	-0.121634	0.0402269	18.3913	1.63926	0.223023	0.795448
TUBB6	0.0424179	0.176833	0.0677214	0.0344063	0.00801165	0.142426	0.0333151	0.134415	0.0253035	-0.109111	24.2745	1.63874	0.223145	0.795448
ANKMY2	0.438581	1.09334	0.255808	1.18092	-0.742335	-0.0875756	-0.925109	0.65476	-0.182774	-0.837533	16.8267	1.63795	0.223331	0.795448
INO80B	1.31108	2.74688	0.342101	1.30705	0.0040236	1.43983	-0.964951	1.4358	-0.968974	-2.40478	17.3896	1.64091	0.223433	0.795448
MRPL48	-0.469568	-0.149366	-0.285104	-0.389809	-0.0797588	0.240443	0.104705	0.320201	0.184464	-0.135738	19.7541	1.6354	0.223931	0.795448
IFT27	0.304422	0.700124	0.0305588	0.0494156	0.255007	0.650709	-0.0188568	0.395702	-0.273863	-0.669565	19.3203	1.63492	0.224045	0.795448
CLCN7	0.395067	-0.0658799	0.666947	0.225864	0.169203	-0.291744	0.441082	-0.460947	0.27188	0.732827	18.6858	1.63492	0.224045	0.795448
TFB1M	0.0698956	0.29811	-0.182146	-0.0625898	0.132485	0.3607	-0.119557	0.228215	-0.252042	-0.480257	20.1194	1.63322	0.224449	0.795448
RPL31	0.0976496	-0.00401784	-0.10739	-0.035195	0.132845	0.0311772	-0.0721949	-0.101667	-0.205039	-0.103372	24.6069	1.63251	0.224618	0.795448
SLC29A2	0.663621	0.581688	0.276933	0.767989	-0.104369	-0.186302	-0.491056	-0.081933	-0.386688	-0.304755	18.49	1.63241	0.224641	0.795448
JPT1	0.124128	-0.152243	-0.128926	0.354535	-0.230406	-0.506777	-0.483461	-0.276371	-0.253054	0.0233166	23.4558	1.63476	0.224642	0.795448
U2SURP	-0.21768	-0.0145856	-0.060399	-0.0553803	-0.1623	0.0407946	-0.00501873	0.203095	0.157281	-0.0458133	21.3712	1.62978	0.225266	0.795448
MTERF4	-1.02998	-0.783262	-0.849032	-0.208381	-0.821603	-0.574881	-0.640652	0.246722	0.180951	-0.0657707	18.568	1.62955	0.22532	0.795448
DDX21	0.00966283	0.0581572	0.000300821	-0.203284	0.212947	0.261441	0.203585	0.0484944	-0.00936201	-0.0578564	23.0437	1.62897	0.225456	0.795448
FERMT1	-1.40763	-0.958333	-0.680747	-1.76057	0.352938	0.802233	1.07982	0.449295	0.726881	0.277586	16.6392	1.62777	0.225744	0.795448
B4GALT6	1.03214	0.00659449	0.157033	-0.594998	1.62714	0.601593	0.752031	-1.02555	-0.875112	0.150438	18.7768	1.62986	0.22588	0.795448
OLA1	-0.123173	0.0258086	-0.105317	-0.120704	-0.00246908	0.146513	0.0153869	0.148982	0.017856	-0.131126	23.0442	1.62675	0.225987	0.795448
PDHA1	-0.088574	-0.0813627	-0.178226	-0.299762	0.211188	0.218399	0.121536	0.00721127	-0.0896522	-0.0968635	21.0817	1.62591	0.226188	0.795448
ACSF3	-0.104643	0.816056	1.09953	-0.0271935	-0.0774498	0.843249	1.12672	0.920699	1.20417	0.283474	17.5184	1.62383	0.226684	0.795448
MYO5A	-0.905103	-0.128132	-0.623643	-0.254322	-0.650782	0.12619	-0.369321	0.776972	0.281461	-0.495511	18.6257	1.6232	0.226834	0.795448
SRRT	-0.235499	-0.174456	-0.136379	-0.11758	-0.117919	-0.0568758	-0.0187988	0.0610427	0.0991198	0.038077	22.4697	1.62303	0.226877	0.795448
LMF2	0.701775	0.394054	0.705081	0.072125	0.62965	0.321929	0.632956	-0.307721	0.00330668	0.311027	20.2278	1.62639	0.226923	0.795448
USP24	0.0937747	0.48906	0.214169	0.13503	-0.0412554	0.35403	0.0791387	0.395286	0.120394	-0.274892	18.9601	1.62243	0.22702	0.795448
CRYZL1	-0.849737	-0.16766	-0.0585833	-0.947781	0.0980441	0.780121	0.889197	0.682077	0.791153	0.109077	17.0744	1.61999	0.227605	0.795448
EXOSC1	-0.216047	0.0543937	0.488349	-0.17649	-0.0395569	0.230884	0.664839	0.270441	0.704396	0.433955	19.2543	1.61973	0.227668	0.795448
VKORC1L1	0.60494	-0.636199	0.319169	-0.785552	1.39049	0.149353	1.10472	-1.24114	-0.285771	0.955368	17.1536	1.61899	0.227847	0.795448
RPL13	0.0552573	-0.12948	-0.245072	-0.140257	0.195514	0.0107769	-0.104815	-0.184737	-0.300329	-0.115592	25.2433	1.61867	0.227924	0.795448
NAV1	0.185865	-0.758453	0.878696	0.44356	-0.257695	-1.20201	0.435135	-0.944318	0.692831	1.63715	16.17	1.61857	0.227947	0.795448
FOSL2	0.183555	-1.17821	-0.33579	-0.902634	1.08619	-0.275576	0.566844	-1.36177	-0.519345	0.84242	16.3558	1.61829	0.228016	0.795448
NDUFA11	0.619733	-0.275411	1.00175	-0.453538	1.07327	0.178126	1.45529	-0.895144	0.382021	1.27717	17.1621	1.61823	0.22803	0.795448
CUTA	0.389444	0.0109167	0.0554915	0.223785	0.165659	-0.212868	-0.168293	-0.378527	-0.333952	0.0445748	20.5844	1.61757	0.228188	0.795448
EHD1	0.0803921	-0.170253	-0.102568	-0.0293691	0.109761	-0.140884	-0.0731992	-0.250645	-0.18296	0.0676845	20.5508	1.61738	0.228234	0.795448
SURF6	0.10104	0.000362987	-0.239673	-0.47506	0.576101	0.475423	0.235387	-0.100677	-0.340714	-0.240036	19.1391	1.61684	0.228365	0.795448
CLDN12	-0.800869	1.06167	-0.39581	-0.418597	-0.382272	1.48026	0.0227874	1.86254	0.405059	-1.45748	17.8346	1.61672	0.228393	0.795448
IMPAD1	-0.275186	-1.09061	-1.25393	-0.358003	0.0828164	-0.732607	-0.895928	-0.815423	-0.978745	-0.163322	17.5487	1.6163	0.228495	0.795448
PPIA	0.0213886	0.172609	0.302051	0.0979458	-0.0765572	0.0746627	0.204105	0.15122	0.280662	0.129443	28.0311	1.61622	0.228513	0.795448
PTGES2	0.193032	-0.162681	0.201231	-0.14648	0.339512	-0.0162012	0.347711	-0.355713	0.00819877	0.363912	19.8275	1.61571	0.228638	0.795448
TRIM26	-0.111507	-0.193661	0.22803	-0.0383477	-0.0731593	-0.155313	0.266377	-0.0821537	0.339537	0.42169	19.1103	1.6151	0.228785	0.795448
FKBP9	0.205899	0.038027	0.0851791	0.217415	-0.0115156	-0.179388	-0.132236	-0.167872	-0.12072	0.0471521	20.8801	1.61503	0.228802	0.795448
PSMG1	0.0134582	0.309773	1.37836	-0.270056	0.283515	0.57983	1.64842	0.296315	1.3649	1.06859	19.365	1.62812	0.228846	0.795448
DPP7	-1.53813	-0.544203	-0.957928	-0.820825	-0.717308	0.276622	-0.137103	0.99393	0.580205	-0.413725	18.2635	1.61398	0.229055	0.795448
PSME1	-0.219919	-0.141582	-0.125659	0.0239605	-0.24388	-0.165543	-0.149619	0.0783366	0.0942603	0.0159236	22.9103	1.61357	0.229156	0.795448
TNK2	-0.141758	-0.780659	0.677383	-0.378767	0.237009	-0.401892	1.05615	-0.638901	0.819142	1.45804	16.5689	1.61325	0.229232	0.795448
YARS2	-0.262793	-0.0725697	-0.112734	-0.127765	-0.135029	0.0551951	0.015031	0.190224	0.15006	-0.040164	21.0078	1.61291	0.229315	0.795448
PRORP	1.04068	0.259792	-0.247745	0.0281602	1.01252	0.231632	-0.275905	-0.780887	-1.28842	-0.507537	17.2297	1.61289	0.22932	0.795448
RBM15	0.106375	0.190938	0.319378	0.154453	-0.0480775	0.036485	0.164925	0.0845624	0.213002	0.12844	20.074	1.61156	0.229642	0.795448
ERCC5	-0.193267	-0.921716	-0.849557	-1.02437	0.831099	0.102649	0.174808	-0.728449	-0.65629	0.0721589	17.1098	1.61143	0.229673	0.795448
YIF1A	-0.24663	-0.228041	0.181251	-0.561751	0.315122	0.333711	0.743003	0.0185888	0.427881	0.409292	18.366	1.61142	0.229677	0.795448
RRP8	0.121593	0.125691	0.187751	-0.200758	0.32235	0.326448	0.388508	0.00409801	0.0661577	0.0620597	19.6804	1.61098	0.229783	0.795448
COG8	0.989579	-0.22444	-0.181778	-0.119182	1.10876	-0.105258	-0.0625962	-1.21402	-1.17136	0.0426623	18.6019	1.61083	0.229819	0.795448
DDX42	-0.116907	-0.071594	-0.212106	-0.170047	0.0531401	0.0984531	-0.0420589	0.045313	-0.095199	-0.140512	21.7821	1.61053	0.229892	0.795448
PARD6B	0.123786	-0.124097	0.991678	0.279476	-0.155689	-0.403573	0.712203	-0.247883	0.867892	1.11578	17.8314	1.60939	0.230171	0.795448
THOC3	-0.239551	-0.131857	-0.206546	0.0127727	-0.252324	-0.14463	-0.219318	0.107694	0.0330057	-0.0746883	21.3919	1.60835	0.230424	0.795448
C1orf43	-0.0718754	0.35073	-0.751544	0.462319	-0.534194	-0.111589	-1.21386	0.422605	-0.679669	-1.10227	16.1369	1.60826	0.230445	0.795448
TMEM106B	0.0885297	0.0675995	0.179636	0.30979	-0.221261	-0.242191	-0.130155	-0.0209301	0.0911061	0.112036	20.2165	1.60818	0.230464	0.795448
DAZAP1	0.449154	-0.152328	-0.284881	0.21331	0.235844	-0.365638	-0.498191	-0.601482	-0.734035	-0.132553	22.9064	1.61638	0.230747	0.795448
DDX10	-0.115884	-0.0284451	-0.1621	-0.298576	0.182692	0.270131	0.136476	0.0874384	-0.0462168	-0.133655	20.4323	1.6062	0.230948	0.795448
ING2	0.281408	0.603698	1.12442	0.404593	-0.123186	0.199105	0.719825	0.322291	0.84301	0.52072	16.503	1.60568	0.231076	0.795448
UBE2Z	-0.509818	-0.130592	-0.333602	-0.386672	-0.123146	0.25608	0.0530702	0.379226	0.176217	-0.203009	20.7296	1.60527	0.231175	0.795448
ANKRD50	0.681914	0.959245	-0.730446	0.749395	-0.0674806	0.20985	-1.47984	0.277331	-1.41236	-1.68969	16.8283	1.60506	0.231227	0.795448
RAB22A	0.948796	-0.487626	-0.186211	-0.499423	1.44822	0.0117967	0.313211	-1.43642	-1.13501	0.301415	17.4928	1.60377	0.231542	0.795448
FAM160A2	-0.0386028	0.312721	1.37188	0.702706	-0.741309	-0.389985	0.66917	0.351323	1.41048	1.05916	16.8999	1.60241	0.231875	0.795448
DCAF13	-0.0220136	0.0367112	-0.16834	-0.27213	0.250116	0.308841	0.103789	0.0587247	-0.146327	-0.205052	20.44	1.60219	0.23193	0.795448
STAG1	-0.210211	-0.301422	-0.199266	-0.252903	0.0426918	-0.0485192	0.0536372	-0.091211	0.0109455	0.102156	20.732	1.60215	0.231939	0.795448
CAPRIN1	0.0209479	0.08682	-0.137825	0.109546	-0.0885977	-0.0227256	-0.24737	0.0658721	-0.158773	-0.224645	21.8667	1.60163	0.232066	0.795448
ZNF574	-0.283058	-0.222474	0.593613	0.494959	-0.778016	-0.717432	0.0986543	0.0605842	0.876671	0.816087	18.136	1.60103	0.232215	0.795448
HNRNPUL2	0.195139	-0.0182827	0.199585	0.100736	0.0944032	-0.119019	0.0988491	-0.213422	0.00444587	0.217868	21.5151	1.60098	0.232225	0.795448
POR	0.417858	-0.13166	0.159767	0.0449789	0.372879	-0.176639	0.114788	-0.549518	-0.258091	0.291428	21.6789	1.60133	0.232271	0.795448
VPS33A	-0.194437	1.46047	-0.063705	0.328852	-0.523289	1.13162	-0.392557	1.6549	0.130732	-1.52417	19.3372	1.61316	0.232533	0.795448
OIP5	-0.553612	0.272794	-0.229321	-0.493287	-0.0603251	0.766081	0.263966	0.826406	0.324291	-0.502115	17.9851	1.5995	0.232591	0.795448
PSRC1	0.170064	0.209243	-0.141115	0.941169	-0.771105	-0.731926	-1.08228	0.0391787	-0.311179	-0.350358	17.8279	1.59769	0.233035	0.795448
TRA2A	0.0256099	-0.145439	0.340112	-0.11347	0.13908	-0.0319692	0.453582	-0.171049	0.314502	0.485551	20.7291	1.59767	0.233041	0.795448
GPC1	0.283808	-0.0477313	-0.11077	0.113821	0.169987	-0.161553	-0.224591	-0.331539	-0.394578	-0.0630387	21.0596	1.59669	0.233283	0.795448
PTAR1	-0.498177	-0.621352	-0.709034	-0.315299	-0.182878	-0.306053	-0.393734	-0.123175	-0.210857	-0.0876814	18.8245	1.59649	0.233332	0.795448
CPOX	0.163339	-0.121855	-0.0779471	-0.105903	0.269242	-0.015952	0.027956	-0.285194	-0.241286	0.043908	21.6452	1.59606	0.233439	0.795448
BAZ1B	-0.0861444	0.0845189	0.163377	0.0698292	-0.155974	0.0146897	0.0935473	0.170663	0.249521	0.0788576	21.4333	1.5951	0.233677	0.795448
SPOUT1	-0.244631	0.0569707	0.37177	-0.599104	0.354472	0.656074	0.970874	0.301602	0.616401	0.314799	17.8282	1.59491	0.233723	0.795448
LIG1	-0.0562232	0.178975	0.0195552	0.13495	-0.191174	0.0440244	-0.115395	0.235198	0.0757784	-0.15942	21.173	1.59456	0.23381	0.795448
TRMT1L	0.0327283	0.263458	0.339982	-0.00596992	0.0386982	0.269428	0.345952	0.23073	0.307253	0.0765233	18.9822	1.59455	0.233812	0.795448
PLK1	0.328201	0.431576	-0.148526	0.524118	-0.195918	-0.0925426	-0.672644	0.103375	-0.476726	-0.580101	19.8105	1.59373	0.234014	0.795602
POLR1B	0.227592	1.32842	0.0808394	0.307413	-0.0798207	1.021	-0.226574	1.10083	-0.146753	-1.24758	18.8612	1.5951	0.234227	0.795602
CNOT3	-0.109425	-0.149248	-0.334902	-0.104726	-0.00469871	-0.0445223	-0.230176	-0.0398236	-0.225477	-0.185653	20.0963	1.59156	0.234554	0.795602
MED21	-1.81379	0.138387	-0.528457	-1.04876	-0.765032	1.18715	0.520301	1.95218	1.28533	-0.666845	17.2649	1.5914	0.234593	0.795602
CNPY3	0.0316184	0.126399	0.267532	0.110153	-0.0785344	0.0162467	0.15738	0.0947811	0.235914	0.141133	20.9949	1.59107	0.234674	0.795602
ASL	-0.104549	0.037537	-0.0798757	-0.304998	0.200449	0.342535	0.225122	0.142086	0.0246729	-0.117413	19.6584	1.59077	0.23475	0.795602
ARHGEF1	-0.135578	0.0159936	0.122523	-0.0841006	-0.0514773	0.100094	0.206624	0.151572	0.258101	0.106529	20.7704	1.59033	0.234859	0.795602
CHAF1B	0.128049	-0.166167	-0.332719	-0.0716017	0.19965	-0.0945651	-0.261117	-0.294215	-0.460767	-0.166552	18.6947	1.58717	0.235646	0.797329
NAA40	-0.119837	0.0145123	-0.282578	-0.452619	0.332782	0.467132	0.170042	0.134349	-0.162741	-0.29709	18.9569	1.5851	0.236164	0.797329
MTAP	-0.050765	0.175752	0.00436953	0.0166442	-0.0674092	0.159107	-0.0122746	0.226517	0.0551346	-0.171382	22.0566	1.58353	0.236555	0.797329
SMAP	-0.188724	0.217771	0.105293	0.0937209	-0.282445	0.12405	0.0115717	0.406495	0.294017	-0.112478	21.3278	1.58251	0.236811	0.797329
SLK	0.188891	0.192553	0.250832	0.241141	-0.0522497	-0.0485877	0.00969111	0.00366195	0.0619408	0.0582788	21.0807	1.58184	0.236979	0.797329
DNAJC7	0.0743206	0.154754	0.0564557	-0.0664037	0.140724	0.221158	0.122859	0.0804338	-0.0178649	-0.0982987	21.7282	1.5817	0.237015	0.797329
ACTR1A	0.0219414	0.172554	0.122392	0.0372073	-0.0152659	0.135346	0.085185	0.150612	0.100451	-0.0501612	22.9767	1.58128	0.23712	0.797329
GNA11	0.216705	-0.407929	0.197546	0.00770585	0.208999	-0.415634	0.18984	-0.624633	-0.0191591	0.605474	19.6369	1.58107	0.237172	0.797329
ZNF580	0.711513	-0.599151	-0.403579	-0.0630749	0.774588	-0.536076	-0.340505	-1.31066	-1.11509	0.195572	18.4545	1.581	0.237191	0.797329
SPRYD7	0.348827	-0.741475	0.380534	-0.918282	1.26711	0.176806	1.29882	-1.0903	0.0317071	1.12201	16.6841	1.58042	0.237337	0.797329
GPR180	-0.258738	1.03051	0.961195	0.551222	-0.80996	0.479285	0.409973	1.28924	1.21993	-0.0693113	16.686	1.57858	0.237801	0.797329
NDUFS7	-0.274195	0.0470289	-0.060186	-0.276507	0.00231154	0.323536	0.216321	0.321224	0.214009	-0.107215	20.8768	1.57833	0.237863	0.797329
FSD1	-0.114982	0.296988	0.159822	-0.215863	0.100881	0.512851	0.375684	0.41197	0.274804	-0.137166	19.9778	1.57828	0.237876	0.797329
ALG1	-0.509297	-0.538924	0.524851	-1.2323	0.723007	0.693379	1.75715	-0.0296279	1.03415	1.06378	17.3409	1.57803	0.237938	0.797329
AGRN	0.245107	0.0435175	-0.056663	0.278832	-0.0337251	-0.235314	-0.335495	-0.201589	-0.30177	-0.10018	19.8872	1.57733	0.238116	0.797329
USP5	-0.13572	0.0352368	0.0333604	-0.0756032	-0.0601165	0.11084	0.108964	0.170956	0.16908	-0.00187645	24.0542	1.57693	0.238216	0.797329
NFKB2	-0.0571554	-0.182474	-0.18744	-0.259277	0.202122	0.0768034	0.0718378	-0.125318	-0.130284	-0.00496564	20.2254	1.57608	0.238431	0.797329
SSR1	-0.149706	-0.249904	-0.105853	-0.163402	0.0136963	-0.0865023	0.0575486	-0.100199	0.0438523	0.144051	22.3232	1.57607	0.238433	0.797329
PARVG	-0.523167	-0.0261832	0.0516749	-0.298434	-0.224733	0.272251	0.350109	0.496984	0.574842	0.0778582	20.4995	1.5758	0.238505	0.797329
DDHD1	-0.986275	-1.50516	0.0823631	-0.787704	-0.198571	-0.717458	0.870067	-0.518887	1.06864	1.58752	17.0374	1.5748	0.238753	0.797329
LYPLA2	0.669305	-0.0929679	0.0227263	0.503217	0.166088	-0.596185	-0.480491	-0.762273	-0.646579	0.115694	20.4992	1.58027	0.238814	0.797329
GOLPH3L	-0.662809	-0.287878	-0.328715	0.63425	-1.29706	-0.922128	-0.962965	0.37493	0.334093	-0.040837	17.1324	1.57431	0.238879	0.797329
SERPINA1	1.17411	0.575597	0.695594	0.224858	0.949251	0.350739	0.470736	-0.598512	-0.478515	0.119997	16.428	1.5741	0.238932	0.797329
C16orf70	0.466906	0.725175	0.269891	0.440037	0.0268692	0.285138	-0.170146	0.258268	-0.197016	-0.455284	18.1797	1.57281	0.239259	0.797329
PPP1R10	0.160387	0.0204158	0.239268	0.186701	-0.0263143	-0.166285	0.0525672	-0.139971	0.0788815	0.218852	20.8514	1.5721	0.23944	0.797329
SPG21	0.463173	0.176258	0.880913	0.439577	0.0235961	-0.263318	0.441336	-0.286914	0.41774	0.704655	19.2833	1.57144	0.239606	0.797329
RNASEH2A	-0.0991544	0.152454	0.167589	-0.118601	0.0194464	0.271055	0.28619	0.251608	0.266744	0.0151354	20.0455	1.5712	0.239667	0.797329
PBXIP1	0.344548	0.136971	0.374697	0.37024	-0.0256921	-0.233269	0.00445672	-0.207576	0.0301488	0.237725	20.105	1.56889	0.240254	0.797329
MACROD1	-0.920388	0.216357	-0.85256	-0.216054	-0.704334	0.432411	-0.636506	1.13674	0.0678281	-1.06892	17.3996	1.56888	0.240258	0.797329
TFIP11	0.120584	0.021831	-0.113744	-0.155918	0.276502	0.177749	0.0421736	-0.0987529	-0.234328	-0.135575	19.7943	1.56881	0.240275	0.797329
FRA10AC1	-0.0209363	1.01167	0.79964	1.24655	-1.26748	-0.234883	-0.446908	1.0326	0.820576	-0.212025	17.0872	1.56794	0.240497	0.797329
HMGA1	1.30052	0.0157831	-0.177617	0.00592726	1.29459	0.00985583	-0.183544	-1.28474	-1.47814	-0.1934	22.5966	1.59345	0.240569	0.797329
SLC7A5	-0.242375	0.089366	-0.0883673	-0.171544	-0.0708316	0.26091	0.0831764	0.331741	0.154008	-0.177733	21.8163	1.56746	0.24062	0.797329
CUEDC2	-0.315416	1.0495	0.645215	0.0541609	-0.369577	0.995343	0.591054	1.36492	0.960631	-0.404289	17.6742	1.56729	0.240663	0.797329
H6PD	0.329193	-0.15067	0.640702	0.518797	-0.189604	-0.669467	0.121906	-0.479863	0.31151	0.791372	17.9923	1.56726	0.240669	0.797329
RPL23A	-0.115933	-0.127561	-0.231353	-0.0917048	-0.0242278	-0.0358558	-0.139648	-0.011628	-0.11542	-0.103792	24.1523	1.56598	0.240997	0.797329
NFS1	0.154234	0.0381573	-0.560691	-0.223444	0.377678	0.261601	-0.337247	-0.116076	-0.714925	-0.598848	18.4455	1.56562	0.241089	0.797329
ALDOA	0.12422	0.150716	0.19041	0.044988	0.0792325	0.105729	0.145422	0.026496	0.0661891	0.039693	26.7799	1.56483	0.241292	0.797329
ANOS1	-0.892368	-1.51768	-0.383568	-0.722593	-0.169774	-0.795084	0.339025	-0.625309	0.5088	1.13411	16.6064	1.56475	0.241312	0.797329
NFKBIB	-0.885959	-0.415662	0.265756	-0.816729	-0.0692301	0.401067	1.08248	0.470297	1.15172	0.681418	18.2561	1.56449	0.241379	0.797329
NFIA	-0.69326	-0.254042	0.209135	0.586754	-1.28001	-0.840797	-0.377619	0.439218	0.902395	0.463177	17.2333	1.56447	0.241385	0.797329
CLCC1	-0.103621	0.11446	-0.125088	-0.0537157	-0.0499055	0.168175	-0.0713725	0.218081	-0.021467	-0.239548	20.842	1.564	0.241504	0.797329
ZC3H11A	0.0495328	0.168965	0.187072	0.112849	-0.0633161	0.0561159	0.0742226	0.119432	0.137539	0.0181068	20.7418	1.56387	0.241536	0.797329
PI4KB	0.346347	-0.217948	-0.137778	0.683347	-0.336999	-0.901294	-0.821125	-0.564295	-0.484125	0.0801696	15.7684	1.56216	0.241975	0.798304
TOM1	-0.112844	-0.2602	0.0275042	-0.0779752	-0.0348691	-0.182225	0.105479	-0.147356	0.140349	0.287704	21.112	1.5614	0.24217	0.798471
ZHX2	-0.180308	-0.594253	-0.322456	0.0712638	-0.251572	-0.665517	-0.39372	-0.413945	-0.142148	0.271797	18.3634	1.55938	0.24269	0.799514
CCT6B	-0.354172	-0.0319635	0.622168	-0.0414444	-0.312727	0.00948083	0.663612	0.322208	0.97634	0.654132	21.8237	1.5713	0.242774	0.799514
EIF2S3	0.0558499	-0.050349	0.0655084	-0.191389	0.247239	0.14104	0.256898	-0.106199	0.00965851	0.115857	20.8655	1.55747	0.243182	0.799955
CCN2	0.285973	0.278387	0.330675	0.602533	-0.31656	-0.324146	-0.271858	-0.00758573	0.0447021	0.0522879	19.2775	1.55702	0.243299	0.799955
UBA6	-0.0973456	0.162691	-0.0325251	-0.183127	0.0857811	0.345818	0.150602	0.260037	0.0648205	-0.195216	20.766	1.55662	0.243402	0.799955
FMNL3	-0.915152	-0.783358	0.103481	-0.30537	-0.609782	-0.477987	0.408851	0.131794	1.01863	0.886839	17.1371	1.55631	0.243483	0.799955
ZNF806	0.115222	-0.506526	-0.246552	-1.17389	1.28911	0.667363	0.927337	-0.621748	-0.361774	0.259974	16.2655	1.55389	0.244109	0.800524
CDK11B	-0.570074	0.0123781	-0.975135	0.374285	-0.944358	-0.361907	-1.34942	0.582452	-0.405061	-0.987513	16.6029	1.55313	0.244304	0.800524
SMAP2	1.02971	-0.0149516	0.285357	0.199702	0.830009	-0.214654	0.0856547	-1.04466	-0.744354	0.300309	17.8889	1.55289	0.244367	0.800524
SIN3A	-0.0224113	0.118251	0.124645	-0.0245128	0.00210146	0.142764	0.149158	0.140662	0.147057	0.00639448	20.8953	1.55255	0.244457	0.800524
UFSP2	-1.20217	-0.405459	0.136431	-0.441626	-0.760542	0.0361665	0.578057	0.796709	1.3386	0.54189	16.2857	1.55199	0.2446	0.800524
MDC1	0.0465894	-0.139809	-0.233328	0.0573399	-0.0107505	-0.197149	-0.290667	-0.186398	-0.279917	-0.0935188	20.6379	1.55191	0.244623	0.800524
COG7	-0.550687	-0.0237756	0.191259	-0.893016	0.342329	0.86924	1.08427	0.526911	0.741946	0.215034	17.4724	1.55147	0.244736	0.800524
LRRC8A	0.267218	-0.181036	0.0439453	0.157608	0.10961	-0.338644	-0.113663	-0.448254	-0.223272	0.224982	19.681	1.55119	0.244808	0.800524
NDUFA4	0.514855	0.0531683	-0.140516	0.0701932	0.444662	-0.0170249	-0.210709	-0.461687	-0.655371	-0.193684	21.9541	1.55278	0.245246	0.801483
ABI2	0.100083	-0.28377	-0.0897501	0.0511429	0.0489397	-0.334913	-0.140893	-0.383853	-0.189833	0.19402	19.8121	1.5479	0.245665	0.80238
PCBP1	0.201907	0.200413	0.121636	0.208007	-0.00609978	-0.00759364	-0.086371	-0.00149386	-0.0802712	-0.0787773	23.734	1.54671	0.245976	0.802662
TMSB4X	-0.186325	0.20439	0.23053	-0.0159291	-0.170396	0.220319	0.246459	0.390715	0.416855	0.0261396	24.5095	1.54854	0.24604	0.802662
FDFT1	0.0358271	-0.20449	-0.452919	0.14121	-0.105382	-0.3457	-0.594129	-0.240317	-0.488746	-0.248429	21.1187	1.54771	0.246258	0.802901
SNU13	0.12854	0.313253	0.312192	-0.144899	0.273439	0.458152	0.457091	0.184713	0.183652	-0.00106091	21.215	1.54489	0.246452	0.803065
STX17	-0.365683	0.977153	0.041642	-0.312018	-0.053665	1.28917	0.35366	1.34284	0.407325	-0.935511	17.1381	1.54161	0.247312	0.804201
RAB27A	0.161165	-0.328143	-0.255551	0.126305	0.03486	-0.454448	-0.381855	-0.489308	-0.416715	0.0725925	19.2713	1.54061	0.247575	0.804201
MSRB3	-1.9744	-2.17598	-2.28201	-1.07082	-0.903584	-1.10517	-1.21119	-0.201582	-0.30761	-0.106028	18.7465	1.55234	0.247863	0.804201
RHEB	0.0426119	-0.224672	-0.11747	0.065107	-0.022495	-0.289779	-0.182577	-0.267284	-0.160082	0.107202	19.7501	1.53865	0.24809	0.804201
VGF	-0.15008	-0.595363	-0.792619	-0.0278737	-0.122207	-0.567489	-0.764745	-0.445282	-0.642538	-0.197256	18.674	1.53864	0.248093	0.804201
PMPCB	0.041618	0.264617	0.0653345	-0.0430886	0.0847066	0.307706	0.108423	0.222999	0.0237165	-0.199283	20.2042	1.53825	0.248198	0.804201
PBX1	-0.111044	0.490788	0.463877	0.303881	-0.414925	0.186907	0.159996	0.601832	0.574921	-0.0269109	18.396	1.53733	0.248441	0.804201
COPG2	0.30582	-0.0424815	0.362107	0.17965	0.12617	-0.222132	0.182457	-0.348302	0.0562863	0.404588	19.5063	1.53693	0.248545	0.804201
RPE	0.591207	1.33384	0.702254	1.32054	-0.729336	0.0132966	-0.618289	0.742632	0.111047	-0.631585	17.6823	1.53691	0.248549	0.804201
TPPP	0.823702	-0.210908	-0.0385583	-0.0797863	0.903488	-0.131122	0.041228	-1.03461	-0.86226	0.17235	17.8316	1.53684	0.24857	0.804201
CNOT9	-0.090327	-0.225929	-0.217307	0.375365	-0.465692	-0.601294	-0.592672	-0.135602	-0.12698	0.00862226	18.9414	1.53667	0.248614	0.804201
YIPF4	0.458738	0.00779997	0.222024	0.0858502	0.372888	-0.0780502	0.136174	-0.450938	-0.236714	0.214224	20.031	1.5364	0.248685	0.804201
NACA	-0.252397	0.0303728	-0.0789818	-0.11155	-0.140847	0.141923	0.0325679	0.28277	0.173415	-0.109355	24.5795	1.53471	0.249132	0.804201
CDKN1B	-0.292255	-0.38707	-1.15181	-0.523065	0.23081	0.135995	-0.628748	-0.0948149	-0.859558	-0.764743	16.374	1.53298	0.249592	0.804201
PSMB6	-0.113137	0.132263	0.578144	-0.0313799	-0.0817568	0.163643	0.609524	0.2454	0.691281	0.445881	22.9644	1.5407	0.24966	0.804201
MRPL30	0.986535	1.28658	0.301288	0.0458178	0.940718	1.24077	0.255471	0.300048	-0.685247	-0.985295	17.8829	1.5327	0.249665	0.804201
OS9	0.383704	0.282215	1.16339	0.231228	0.152477	0.0509876	0.932167	-0.101489	0.779691	0.88118	18.0471	1.53232	0.249764	0.804201
PLEK2	-0.123423	-0.357477	-0.73753	0.166418	-0.289841	-0.523894	-0.903948	-0.234053	-0.614107	-0.380053	17.5672	1.53169	0.249932	0.804201
ATP5MPL	-0.236462	-1.27129	-1.29268	-0.257103	0.020641	-1.01418	-1.03558	-1.03482	-1.05622	-0.0213959	17.5385	1.53168	0.249936	0.804201
CUL5	-0.20089	-0.125277	0.0494568	-0.467836	0.266946	0.342558	0.517292	0.0756129	0.250347	0.174734	19.1003	1.53141	0.250008	0.804201
USP3	0.0494953	0.496365	-0.260576	0.00285058	0.0466447	0.493514	-0.263427	0.44687	-0.310072	-0.756941	17.7571	1.53067	0.250204	0.804201
ACO1	-0.0698343	0.0825666	0.201373	0.0521767	-0.122011	0.0303899	0.149196	0.152401	0.271207	0.118807	21.7574	1.53041	0.250273	0.804201
DAP	0.299368	0.257455	1.5999	0.122575	0.176793	0.134879	1.47732	-0.0419135	1.30053	1.34244	18.3417	1.53221	0.250334	0.804201
MARK2	-0.162188	-0.0958685	-0.37904	-0.209919	0.0477308	0.114051	-0.169121	0.06632	-0.216852	-0.283172	20.1012	1.53012	0.250349	0.804201
ARAF	0.111422	0.359711	0.887619	0.245299	-0.133877	0.114412	0.64232	0.248289	0.776197	0.527908	17.9876	1.52951	0.250511	0.804201
EXOSC7	-0.0903762	-0.0310827	0.46022	-0.11862	0.0282442	0.0875376	0.57884	0.0592934	0.550596	0.491303	19.4602	1.52825	0.250847	0.804201
USP32	-0.0930316	0.145235	0.187787	-0.0557011	-0.0373305	0.200936	0.243488	0.238267	0.280819	0.0425524	19.5494	1.52745	0.251062	0.804201
HPRT1	-0.205132	0.00108291	-0.14012	-0.103336	-0.101796	0.104419	-0.0367834	0.206215	0.0650126	-0.141203	21.3387	1.52714	0.251144	0.804201
ETFA	-0.109477	0.0289809	-0.143135	0.00520394	-0.114681	0.023777	-0.148339	0.138458	-0.0336583	-0.172116	21.6919	1.52691	0.251205	0.804201
CHMP5	0.211711	-0.08339	-0.149816	0.358342	-0.146631	-0.441732	-0.508158	-0.295101	-0.361527	-0.066426	20.1646	1.52555	0.251571	0.804201
FTO	-0.458675	0.0124587	-0.179827	-0.0728892	-0.385786	0.0853479	-0.106938	0.471134	0.278848	-0.192286	19.5944	1.52528	0.251642	0.804201
ASXL2	0.637663	-0.244646	0.121395	-0.421606	1.05927	0.17696	0.543001	-0.882309	-0.516268	0.366041	16.0836	1.52446	0.251861	0.804201
HNRNPH2	0.236956	0.125685	0.307889	0.181853	0.0551027	-0.0561679	0.126036	-0.111271	0.070933	0.182204	20.4591	1.5241	0.251959	0.804201
BCAP29	0.364241	-0.210732	-0.137492	-0.0443947	0.408636	-0.166338	-0.0930975	-0.574973	-0.501733	0.07324	18.3506	1.52405	0.251971	0.804201
BAIAP2L1	0.257615	0.247369	0.187893	0.220411	0.037204	0.0269581	-0.032518	-0.0102459	-0.069722	-0.0594761	20.0258	1.52338	0.252152	0.804201
MRPL23	0.0885402	-0.274211	-0.311485	-0.4625	0.55104	0.188289	0.151014	-0.362751	-0.400026	-0.0372743	20.6824	1.52276	0.252316	0.804201
DLAT	0.00181868	-0.061378	-0.164832	0.0127671	-0.0109484	-0.0741451	-0.177599	-0.0631967	-0.166651	-0.103454	22.5398	1.52244	0.252402	0.804201
MEAK7	0.33326	0.274861	0.294299	0.300372	0.0328873	-0.0255109	-0.00607313	-0.0583982	-0.0389604	0.0194378	19.0671	1.52138	0.252687	0.804201
UBP1	0.969159	2.05284	1.71331	1.59405	-0.624889	0.458789	0.119266	1.08368	0.744155	-0.339523	16.9271	1.52131	0.252707	0.804201
TRIOBP	-0.0714892	-0.0295249	-0.151064	0.17321	-0.2447	-0.202735	-0.324274	0.0419644	-0.079575	-0.121539	19.9882	1.52121	0.252732	0.804201
ECI2	-0.167905	-0.0460673	1.22707	0.0942389	-0.262144	-0.140306	1.13283	0.121838	1.39497	1.27314	19.0995	1.52755	0.252751	0.804201
ITPKA	1.31051	-0.304097	0.777558	0.277506	1.033	-0.581603	0.500052	-1.6146	-0.532948	1.08166	16.9686	1.52068	0.252877	0.804201
UBE2A	0.0739851	-0.0379077	0.12065	-0.343354	0.417339	0.305446	0.464004	-0.111893	0.0466647	0.158557	19.3682	1.5201	0.253032	0.804233
MAP4K3	-0.267652	0.39846	0.612789	-0.0667711	-0.200881	0.465231	0.67956	0.666112	0.880441	0.214329	17.837	1.51851	0.253461	0.805136
MYH9	0.119496	-0.0268236	0.0198576	0.112947	0.00654926	-0.13977	-0.0930889	-0.146319	-0.0996382	0.0466812	25.1311	1.51797	0.253606	0.805137
STRBP	0.982978	0.108414	-0.0666713	0.219867	0.76311	-0.111453	-0.286539	-0.874563	-1.04965	-0.175086	18.1373	1.51702	0.253863	0.805493
PLBD2	-0.624628	-0.696729	0.993062	-0.660948	0.0363196	-0.0357808	1.65401	-0.0721004	1.61769	1.68979	18.6695	1.52253	0.254251	0.806131
ATN1	-0.607682	0.0948245	-0.556861	0.00433816	-0.61202	0.0904863	-0.561199	0.702506	0.0508208	-0.651685	18.5486	1.5152	0.254354	0.806131
VPS36	-0.0672937	0.157775	0.354325	0.18873	-0.256024	-0.0309549	0.165594	0.225069	0.421618	0.196549	18.6557	1.51447	0.254552	0.8063
GSDMD	0.257627	0.041941	0.0260586	-0.112614	0.370241	0.154555	0.138673	-0.215686	-0.231568	-0.0158824	21.3953	1.51293	0.25497	0.807162
PIK3IP1	0.156433	-0.614841	0.892446	1.06079	-0.904352	-1.67563	-0.168339	-0.771274	0.736013	1.50729	16.77	1.51031	0.25568	0.808751
SLC35B2	0.587289	-0.0489945	0.00246281	0.115003	0.472286	-0.163997	-0.11254	-0.636283	-0.584826	0.0514574	20.5107	1.51198	0.255763	0.808751
CHD1	0.012516	0.683226	0.55394	0.135139	-0.122623	0.548087	0.418801	0.67071	0.541424	-0.129286	18.0511	1.50918	0.255989	0.808789
CTDSPL2	0.14499	0.200507	0.293304	0.211418	-0.0664284	-0.0109112	0.0818854	0.0555172	0.148314	0.0927966	19.6622	1.50868	0.256125	0.808789
RBM12B	-0.486931	-0.310534	-0.720627	-0.57424	0.0873088	0.263706	-0.146387	0.176397	-0.233696	-0.410093	19.4134	1.5074	0.256475	0.808789
ZWINT	-0.108294	0.331856	-0.196748	0.42904	-0.537334	-0.0971842	-0.625788	0.44015	-0.0884542	-0.528604	19.6589	1.50721	0.256527	0.808789
APOE	0.108903	-0.103992	1.28743	0.0908246	0.0180785	-0.194817	1.1966	-0.212895	1.17853	1.39142	18.8851	1.51029	0.256546	0.808789
SNTB1	-1.05012	-1.08432	-0.204928	-0.34368	-0.706439	-0.740638	0.138751	-0.0341992	0.84519	0.87939	17.1907	1.5052	0.257077	0.808789
MFSD1	0.688454	-0.0615079	0.108392	-0.142243	0.830697	0.0807351	0.250635	-0.749962	-0.580062	0.1699	18.0925	1.50508	0.257109	0.808789
PIK3CB	0.165448	0.281469	0.928827	0.0011301	0.164318	0.280339	0.927697	0.116021	0.763379	0.647359	15.9146	1.50475	0.257199	0.808789
IRGQ	0.00950718	-0.180744	-0.1584	0.0561075	-0.0466003	-0.236851	-0.214508	-0.190251	-0.167907	0.0223436	20.9796	1.50332	0.257592	0.808789
CDK5RAP3	-0.333819	-0.138137	-0.11918	-0.120227	-0.213592	-0.0179098	0.00104754	0.195682	0.214639	0.0189574	20.0051	1.50295	0.257691	0.808789
RNF216	0.928771	0.408357	0.0815911	0.814129	0.114641	-0.405772	-0.732538	-0.520414	-0.84718	-0.326766	16.0157	1.50287	0.257713	0.808789
USP14	-0.212801	-0.034995	-0.100128	-0.162689	-0.0501121	0.127694	0.0625603	0.177806	0.112672	-0.0651333	22.5278	1.50286	0.257716	0.808789
CCDC6	-0.10807	-0.122968	-0.191794	0.0147604	-0.122831	-0.137728	-0.206554	-0.0148977	-0.0837238	-0.0688261	21.597	1.50281	0.257732	0.808789
MAGEC1	-1.75503	0.119033	-0.484299	-1.04198	-0.713041	1.16102	0.557685	1.87406	1.27073	-0.603332	16.5356	1.50252	0.257812	0.808789
DCPS	-0.218467	-0.0835257	-0.22321	-0.0542396	-0.164227	-0.0292861	-0.168971	0.134941	-0.00474359	-0.139685	20.8017	1.50078	0.258289	0.809461
VPS18	-0.0493535	-0.124599	0.862479	-0.294339	0.244986	0.16974	1.15682	-0.0752454	0.911833	0.987078	18.0177	1.50038	0.258399	0.809461
GPD1L	-0.503202	0.303021	-0.301068	-1.05166	0.548457	1.35468	0.750591	0.806223	0.202135	-0.604089	17.4257	1.49976	0.25857	0.809461
SMC2	-0.0933825	0.0520326	0.046488	-0.0372803	-0.0561022	0.0893129	0.0837683	0.145415	0.139871	-0.00554457	22.0274	1.49935	0.258684	0.809461
SNX3	0.241092	-0.00395658	0.143492	0.189001	0.0520913	-0.192957	-0.045509	-0.245049	-0.0976003	0.147448	21.798	1.49888	0.258812	0.809461
KNOP1	-0.0449401	0.186571	0.361671	-0.0916999	0.0467598	0.278271	0.453371	0.231511	0.406611	0.1751	19.859	1.49856	0.258899	0.809461
RPTOR	-0.539501	-0.516344	-0.413417	-0.878429	0.338927	0.362084	0.465012	0.0231573	0.126085	0.102927	17.8792	1.49681	0.259385	0.809757
PHIP	-0.293282	-0.117697	-0.0608313	-0.004913	-0.288369	-0.112784	-0.0559183	0.175584	0.23245	0.0568659	19.4916	1.49664	0.259429	0.809757
EHBP1L1	0.152241	0.14467	0.0402331	0.306032	-0.153791	-0.161362	-0.265799	-0.0075713	-0.112008	-0.104437	20.0344	1.49664	0.259431	0.809757
CTSD	0.0761929	0.137702	0.235545	0.179425	-0.103232	-0.0417232	0.0561205	0.061509	0.159353	0.0978436	22.2607	1.49562	0.259713	0.810181
ENO2	0.165808	0.14535	0.251773	0.0906354	0.0751729	0.0547149	0.161138	-0.020458	0.0859647	0.106423	22.0797	1.49419	0.260108	0.810251
POLA2	-0.730708	0.188858	-0.511514	-0.312406	-0.418302	0.501264	-0.199108	0.919566	0.219193	-0.700372	17.9512	1.49337	0.260336	0.810251
LSR	0.40326	0.156652	0.141466	0.274551	0.128709	-0.117899	-0.133085	-0.246608	-0.261794	-0.0151859	21.2547	1.49304	0.260426	0.810251
ABCC1	-0.0550132	-0.247381	1.07599	0.0498367	-0.10485	-0.297218	1.02615	-0.192368	1.131	1.32337	18.8318	1.49451	0.26055	0.810251
INTS5	-0.170116	-0.454308	0.349622	-0.621497	0.451381	0.167189	0.971119	-0.284193	0.519738	0.80393	18.1265	1.49252	0.260572	0.810251
RBM14	0.259547	-0.0299077	0.0298547	-0.00890889	0.268456	-0.0209988	0.0387636	-0.289455	-0.229692	0.0597625	22.961	1.49238	0.26061	0.810251
MITD1	0.367929	-0.253802	0.389138	0.506181	-0.138252	-0.759983	-0.117043	-0.621731	0.0212093	0.642941	15.954	1.48953	0.261403	0.812263
GOLGA7	1.18608	0.0562532	1.9664	0.965755	0.220321	-0.909502	1.00064	-1.12982	0.780322	1.91014	17.9332	1.49039	0.261693	0.81271
ILVBL	-0.323184	-0.277579	-0.39746	-0.473067	0.149883	0.195488	0.075607	0.0456055	-0.0742756	-0.119881	18.8918	1.48687	0.262146	0.813284
ILF2	-0.12899	-0.117968	0.311668	-0.203015	0.074025	0.085047	0.514683	0.011022	0.440658	0.429636	22.4086	1.48867	0.26217	0.813284
DHX36	-0.0994373	0.0403462	0.199917	0.180061	-0.279499	-0.139715	0.0198558	0.139784	0.299355	0.159571	19.3603	1.48559	0.262502	0.813473
SAP30L	0.901533	0.201882	0.633782	-0.0692989	0.970832	0.271181	0.703081	-0.699651	-0.267751	0.4319	18.395	1.48518	0.262618	0.813473
STK26	-0.421937	-0.593771	-0.573613	-0.469987	0.0480496	-0.123785	-0.103626	-0.171834	-0.151676	0.0201583	18.8768	1.48499	0.26267	0.813473
TCEAL1	0.356805	-0.728407	-0.625582	-0.367685	0.724491	-0.360721	-0.257897	-1.08521	-0.982388	0.102824	16.5793	1.48385	0.262989	0.814007
ILKAP	0.265381	0.0782265	-0.085236	0.0195247	0.245857	0.0587017	-0.104761	-0.187155	-0.350617	-0.163462	21.3533	1.48239	0.2634	0.814277
UBAC1	-1.63055	-0.908961	-0.744903	-1.11154	-0.519006	0.20258	0.366637	0.721586	0.885643	0.164058	16.9192	1.48233	0.263417	0.814277
EXD2	0.0537147	-0.152164	-0.605599	-1.39815	1.45187	1.24599	0.792553	-0.205879	-0.659314	-0.453435	16.7569	1.48193	0.263529	0.814277
CCT2	-0.0679257	0.097962	0.0132385	-0.0163074	-0.0516183	0.114269	0.0295459	0.165888	0.0811643	-0.0847234	23.4379	1.48118	0.263741	0.814277
RPL17	-0.192883	-0.0566001	-0.236353	-0.18576	-0.00712291	0.12916	-0.0505923	0.136283	-0.0434694	-0.179753	24.6864	1.48087	0.263828	0.814277
ECI1	-0.147618	0.021478	-0.0838585	-0.128752	-0.0188662	0.15023	0.0448934	0.169096	0.0637596	-0.105337	22.7599	1.48041	0.263955	0.814277
GTF2E2	0.226962	0.352416	0.352862	0.178505	0.0484566	0.173911	0.174357	0.125455	0.1259	0.000445447	19.428	1.47928	0.264273	0.814659
USP15	-0.0330937	-0.322748	-0.443267	-0.273272	0.240178	-0.0494758	-0.169995	-0.289654	-0.410173	-0.120519	19.6559	1.47893	0.264372	0.814659
RBBP6	0.831761	-0.400564	0.278731	0.227404	0.604358	-0.627968	0.051327	-1.23233	-0.553031	0.679295	17.9768	1.47827	0.26456	0.814736
PCLAF	-0.095257	0.089368	-0.288725	0.442746	-0.538003	-0.353378	-0.73147	0.184625	-0.193468	-0.378093	20.7946	1.47857	0.265029	0.814736
CCNK	-0.204318	0.403143	0.587401	0.0726954	-0.277014	0.330447	0.514706	0.607461	0.79172	0.184259	19.1238	1.47606	0.265184	0.814736
SPEN	-0.0260568	-0.731367	-0.624325	0.215766	-0.241823	-0.947133	-0.840091	-0.70531	-0.598268	0.107041	16.6453	1.47476	0.265551	0.814736
PHF10	-0.405163	-0.0426437	0.0589201	0.00191945	-0.407082	-0.0445632	0.0570006	0.362519	0.464083	0.101564	19.4679	1.47448	0.265631	0.814736
SUZ12	0.0547428	0.137219	0.45136	0.1687	-0.113958	-0.0314819	0.282659	0.0824758	0.396617	0.314141	19.2185	1.47349	0.265911	0.814736
MCEE	-0.465335	-0.548986	-0.98711	0.264878	-0.730213	-0.813863	-1.25199	-0.0836502	-0.521774	-0.438124	17.004	1.4731	0.266021	0.814736
GBE1	-0.0806232	0.0772412	-0.206523	-0.228806	0.148183	0.306047	0.0222832	0.157864	-0.1259	-0.283764	20.2401	1.47306	0.266033	0.814736
NDUFS1	0.156713	-0.0435766	0.0950192	-0.0516732	0.208386	0.00809656	0.146692	-0.200289	-0.0616936	0.138596	21.5199	1.47237	0.26623	0.814736
ISG20L2	0.719834	0.0484484	-0.312356	-0.602753	1.32259	0.651202	0.290397	-0.671385	-1.03219	-0.360805	18.447	1.47184	0.26638	0.814736
KIN	-0.0735171	0.458753	-0.167929	0.189554	-0.263071	0.269199	-0.357482	0.53227	-0.0944115	-0.626682	20.9523	1.47349	0.266437	0.814736
CAP2	0.084271	0.0361326	0.177357	0.00769619	0.0765749	0.0284364	0.169661	-0.0481384	0.0930864	0.141225	21.2954	1.47154	0.266465	0.814736
TMEM50A	-0.216864	0.570165	-0.735291	0.151507	-0.368371	0.418658	-0.886798	0.787029	-0.518427	-1.30546	16.6283	1.47125	0.266548	0.814736
COPE	0.0298677	0.00619832	-0.113889	0.295005	-0.265138	-0.288807	-0.408894	-0.0236693	-0.143756	-0.120087	21.4369	1.47054	0.266749	0.814736
THOC1	0.139731	-0.213644	-0.0487289	-0.00378253	0.143513	-0.209862	-0.0449463	-0.353375	-0.18846	0.164916	19.6299	1.47042	0.266783	0.814736
DCP1B	0.0461835	-0.292645	-0.420993	0.276667	-0.230484	-0.569312	-0.697661	-0.338828	-0.467177	-0.128349	18.1501	1.46987	0.266941	0.814736
CALCOCO1	0.40568	0.0603713	0.629396	0.725323	-0.319643	-0.664952	-0.0959268	-0.345309	0.223716	0.569025	19.1122	1.46963	0.267007	0.814736
TUBB3	0.345594	-0.154296	-0.35419	0.0180554	0.327538	-0.172352	-0.372245	-0.49989	-0.699783	-0.199893	19.8651	1.46938	0.26708	0.814736
TXNDC9	-0.235695	-0.0378535	0.0145715	0.219706	-0.455401	-0.25756	-0.205135	0.197841	0.250267	0.0524251	19.6882	1.46785	0.267516	0.814736
MRPS35	-0.176636	0.0340602	0.224932	-0.20763	0.0309944	0.24169	0.432562	0.210696	0.401568	0.190872	19.1101	1.46762	0.267581	0.814736
DHFR	-0.546974	-0.142174	-0.266181	-0.135694	-0.41128	-0.00648051	-0.130488	0.4048	0.280793	-0.124007	19.3422	1.46757	0.267597	0.814736
DHCR7	0.504121	-0.0806034	1.19561	0.105752	0.398368	-0.186356	1.08986	-0.584724	0.691492	1.27622	22.1254	1.48713	0.26763	0.814736
FST	2.03627	0.384181	0.774844	1.31454	0.721729	-0.930357	-0.539694	-1.65209	-1.26142	0.390663	16.1314	1.46697	0.267768	0.814736
LSM8	-0.11588	-0.219584	-0.690941	-0.452513	0.336633	0.232929	-0.238428	-0.103704	-0.575061	-0.471357	19.3526	1.46588	0.26808	0.814867
TMSB10	-0.0868486	0.180062	0.262557	0.182891	-0.26974	-0.00282937	0.0796662	0.26691	0.349406	0.0824956	23.2992	1.46579	0.268104	0.814867
KIF7	0.393374	0.807048	0.794097	0.291823	0.101551	0.515225	0.502275	0.413674	0.400724	-0.0129502	17.6999	1.46514	0.268291	0.814988
PCYOX1L	0.467919	0.650856	0.446504	-0.101983	0.569901	0.752839	0.548487	0.182938	-0.0214141	-0.204352	17.7407	1.46417	0.268568	0.815285
HEXIM1	0.166719	0.14445	0.0861848	0.388243	-0.221525	-0.243794	-0.302059	-0.0222692	-0.080534	-0.0582648	21.0094	1.46283	0.268952	0.815285
ENSA	0.15353	0.084733	0.105378	0.549918	-0.396388	-0.465185	-0.444539	-0.0687968	-0.0481517	0.0206451	21.416	1.46464	0.268955	0.815285
AKAP1	-0.0262451	0.567368	0.0435073	-0.0581033	0.0318582	0.625471	0.101611	0.593613	0.0697524	-0.52386	19.0187	1.46275	0.268975	0.815285
NOP16	0.0341858	-0.148009	-0.549601	-0.204043	0.238229	0.0560343	-0.345557	-0.182195	-0.583786	-0.401592	19.6391	1.46199	0.269195	0.815507
AK4	0.324699	0.0232316	0.0395703	-0.110921	0.43562	0.134152	0.150491	-0.301468	-0.285129	0.0163387	21.1288	1.46073	0.269556	0.816156
KXD1	0.603733	-0.300539	0.526414	0.236686	0.367047	-0.537225	0.289728	-0.904272	-0.0773188	0.826953	15.9647	1.45954	0.269899	0.816748
AFDN	-0.143525	0.145874	0.0868904	-0.0532209	-0.0903036	0.199095	0.140111	0.289398	0.230415	-0.0589832	20.6933	1.45846	0.270211	0.816748
RICTOR	-1.7324	0.377249	-0.673527	-0.469101	-1.2633	0.846349	-0.204426	2.10965	1.05887	-1.05078	16.4166	1.4579	0.270371	0.816748
ELF1	0.40937	-0.502403	0.18552	-0.0994997	0.508869	-0.402903	0.28502	-0.911773	-0.22385	0.687923	18.0417	1.45746	0.270499	0.816748
ATAD2	-0.184096	0.152489	0.0935481	-0.130538	-0.053558	0.283028	0.224087	0.336586	0.277645	-0.0589411	20.5235	1.45737	0.270524	0.816748
CBX8	0.580045	0.089061	0.0989449	0.0581128	0.521932	0.0309483	0.0408321	-0.490984	-0.4811	0.00988382	19.8313	1.45618	0.270868	0.816748
ABCF1	-0.0590106	0.0275517	0.177485	0.0445819	-0.103593	-0.0170302	0.132903	0.0865624	0.236496	0.149933	22.0011	1.45593	0.270941	0.816748
HEATR6	-0.390963	-0.135201	-0.445793	-0.204409	-0.186554	0.0692084	-0.241384	0.255762	-0.05483	-0.310592	18.6942	1.45574	0.270997	0.816748
RPL5	-0.0550784	0.107721	-0.0202444	-0.0386955	-0.0163829	0.146417	0.0184511	0.1628	0.034834	-0.127966	24.425	1.45547	0.271074	0.816748
CRIP2	0.137044	0.151537	0.209867	0.299383	-0.162339	-0.147846	-0.0895155	0.0144928	0.0728231	0.0583304	20.4618	1.45363	0.271607	0.817444
TCERG1	0.171538	-0.124181	-0.0426792	0.0408544	0.130684	-0.165035	-0.0835336	-0.295719	-0.214218	0.0815015	21.5551	1.4535	0.271644	0.817444
MAP1S	-0.374186	-0.268585	-0.339772	-0.391121	0.0169356	0.122536	0.0513499	0.105601	0.0344143	-0.0711865	19.0492	1.45264	0.271895	0.817444
TXNDC17	0.571197	-0.17579	0.407474	0.0198264	0.55137	-0.195617	0.387648	-0.746987	-0.163723	0.583264	22.2979	1.46116	0.272025	0.817444
PDCD2L	-0.456688	0.00244396	0.698612	-0.413478	-0.0432103	0.415922	1.11209	0.459132	1.1553	0.696168	17.2487	1.45185	0.272123	0.817444
LIN54	-0.298271	0.0294974	0.317828	-0.254642	-0.0436289	0.284139	0.572469	0.327768	0.616098	0.28833	18.2707	1.45163	0.272187	0.817444
CTTNBP2NL	0.167277	0.0341126	-0.124127	0.0293425	0.137935	0.00477017	-0.153469	-0.133165	-0.291404	-0.158239	20.1919	1.45106	0.272352	0.817494
LRRC8E	0.800811	-0.157331	0.509694	0.506377	0.294435	-0.663708	0.00331689	-0.958142	-0.291118	0.667024	16.766	1.45015	0.272617	0.817494
RBMX2	0.174511	-0.0045646	-0.101035	0.310672	-0.136161	-0.315236	-0.411707	-0.179075	-0.275546	-0.0964708	19.1455	1.45006	0.272645	0.817494
HMOX2	0.192793	0.114547	0.0430384	0.0363828	0.15641	0.0781644	0.00665562	-0.0782456	-0.149754	-0.0715088	21.3716	1.44849	0.273102	0.818084
TBC1D13	0.0534352	0.245615	0.379191	0.176901	-0.123466	0.0687145	0.20229	0.19218	0.325756	0.133576	18.9537	1.44837	0.273136	0.818084
PFDN6	0.158507	0.103761	-0.0521357	0.266165	-0.107658	-0.162404	-0.3183	-0.0547459	-0.210643	-0.155897	21.3567	1.44719	0.273481	0.81809
MIDEAS	0.117668	-0.22892	-0.113132	0.0424077	0.0752598	-0.271327	-0.155539	-0.346587	-0.230799	0.115788	19.173	1.44536	0.274016	0.81809
RPL9P8	0.0291046	0.117011	-0.110059	-0.0212536	0.0503582	0.138264	-0.0888052	0.0879062	-0.139163	-0.22707	24.2616	1.44485	0.274166	0.81809
TSC2	0.299872	0.152476	0.348868	0.573789	-0.273918	-0.421314	-0.224921	-0.147396	0.0489965	0.196393	18.1318	1.44452	0.274261	0.81809
CRELD2	0.0394508	-0.304807	-0.110074	0.0240443	0.0154065	-0.328851	-0.134118	-0.344258	-0.149524	0.194733	19.468	1.44411	0.274383	0.81809
NELFB	-0.316034	-0.150998	-0.131384	-0.277726	-0.0383084	0.126727	0.146341	0.165036	0.18465	0.019614	19.3043	1.44352	0.274555	0.81809
HMG20B	-1.18301	-0.943759	-0.588807	-1.29559	0.112583	0.351834	0.706785	0.23925	0.594202	0.354951	16.1779	1.44259	0.274829	0.81809
SNX17	-0.0239977	0.18139	0.164888	0.216719	-0.240717	-0.0353289	-0.0518311	0.205388	0.188886	-0.0165022	20.1109	1.44259	0.27483	0.81809
RRP12	-0.119134	0.0570004	-0.047439	-0.129883	0.0107492	0.186883	0.0824438	0.176134	0.0716946	-0.104439	20.7319	1.44214	0.274961	0.81809
NFAT5	0.252138	0.478445	1.1975	0.36582	-0.113682	0.112625	0.831681	0.226307	0.945363	0.719056	18.1185	1.44177	0.275071	0.81809
OGDHL	0.23979	0.256052	0.802101	0.303919	-0.0641293	-0.0478668	0.498182	0.0162625	0.562311	0.546049	18.9284	1.44081	0.275353	0.81809
TMEM59	0.88516	-0.126206	0.411282	0.445218	0.439943	-0.571424	-0.0339359	-1.01137	-0.473879	0.537488	18.8524	1.43974	0.275667	0.81809
CKMT1B	0.252951	-0.120459	-0.069821	0.161203	0.0917478	-0.281662	-0.231024	-0.37341	-0.322772	0.0506379	19.973	1.43962	0.275701	0.81809
FUT8	-0.0383642	-0.229934	-0.3111	-0.178605	0.14024	-0.0513289	-0.132496	-0.191569	-0.272736	-0.0811667	19.0778	1.43924	0.275813	0.81809
MCM7	0.052668	0.186187	0.125697	0.0257646	0.0269034	0.160423	0.0999319	0.133519	0.0730285	-0.0604906	23.038	1.43824	0.27611	0.81809
NAA30	-0.169515	-0.316618	-0.198517	-0.302905	0.13339	-0.0137132	0.104388	-0.147103	-0.0290015	0.118101	19.0126	1.43735	0.276373	0.81809
CRMP1	0.187013	-0.0526628	-0.00498814	0.137943	0.0490698	-0.190606	-0.142931	-0.239676	-0.192001	0.0476747	20.8281	1.43693	0.276495	0.81809
PPP2R1B	0.167892	0.28625	-0.32428	-0.182997	0.350889	0.469247	-0.141283	0.118358	-0.492172	-0.61053	18.9027	1.43649	0.276627	0.81809
ITGA6	0.2226	0.0904765	0.177751	0.0761363	0.146463	0.0143402	0.101614	-0.132123	-0.0448492	0.0872741	20.5986	1.43597	0.27678	0.81809
AP1S2	-0.186685	0.254184	0.133177	-0.0177315	-0.168953	0.271916	0.150908	0.440869	0.319862	-0.121007	19.1698	1.4354	0.276949	0.81809
AASDHPPT	-0.411594	-0.0991866	-0.174784	-0.198612	-0.212981	0.0994259	0.0238288	0.312407	0.23681	-0.075597	20.6701	1.43525	0.276994	0.81809
KIF20A	-0.623311	-0.453765	-0.742868	-0.0572725	-0.566039	-0.396492	-0.685595	0.169547	-0.119557	-0.289103	18.6986	1.43501	0.277064	0.81809
GRB2	0.150002	0.0939538	-0.0212005	0.121277	0.0287253	-0.0273227	-0.142477	-0.056048	-0.171202	-0.115154	21.25	1.43496	0.277078	0.81809
LMNB1	0.0502226	0.0707251	0.170236	0.114201	-0.0639783	-0.0434758	0.0560355	0.0205025	0.120014	0.0995113	25.5743	1.4343	0.277275	0.81809
AGFG1	0.201239	-0.28809	-0.182498	0.119994	0.081245	-0.408084	-0.302492	-0.489329	-0.383737	0.105592	19.7689	1.43405	0.27735	0.81809
NSRP1	-0.844185	-1.11656	-1.45531	-1.19631	0.352125	0.079751	-0.259004	-0.272374	-0.611129	-0.338755	16.8256	1.43399	0.277365	0.81809
ATOX1	0.141492	-0.0724419	-0.0291556	0.238728	-0.0972358	-0.31117	-0.267883	-0.213934	-0.170647	0.0432864	21.935	1.43394	0.277382	0.81809
APOO	-0.171137	0.160932	-0.0278872	0.0611759	-0.232313	0.0997561	-0.089063	0.332069	0.14325	-0.188819	20.3822	1.43392	0.277386	0.81809
UBE4B	0.129879	0.309529	0.266685	0.330559	-0.200679	-0.0210301	-0.0638744	0.179649	0.136805	-0.0428443	19.8882	1.43334	0.277559	0.81809
BLOC1S1	0.39443	0.0845145	0.0274654	1.38516	-0.990726	-1.30064	-1.35769	-0.309916	-0.366965	-0.0570492	16.6716	1.43318	0.277605	0.81809
SHTN1	0.0667478	0.321535	0.255029	0.287132	-0.220384	0.0344028	-0.0321033	0.254787	0.188281	-0.0665061	19.4394	1.43286	0.2777	0.81809
ANXA2	0.112204	0.11529	0.217423	0.103505	0.00869951	0.0117859	0.113919	0.00308636	0.105219	0.102133	26.2664	1.43196	0.27797	0.818451
FKBP3	0.136688	-0.0343725	0.0397106	0.203254	-0.066566	-0.237626	-0.163543	-0.17106	-0.0969771	0.0740831	23.4371	1.43129	0.278169	0.818604
UFD1	0.194285	-0.0108116	-0.0882314	0.0141393	0.180146	-0.0249508	-0.102371	-0.205097	-0.282517	-0.0774198	21.2738	1.42938	0.278738	0.819731
RPA2	0.370412	-0.274236	0.224836	0.0239176	0.346494	-0.298154	0.200918	-0.644648	-0.145576	0.499072	21.2867	1.43083	0.278847	0.819731
ANGPT1	1.33797	2.33226	2.07805	0.938917	0.399054	1.39334	1.13914	0.994289	0.740082	-0.254207	19.1306	1.44223	0.279156	0.819755
F5	-0.568128	-0.833453	-0.675576	-1.47987	0.91174	0.646416	0.804293	-0.265325	-0.107447	0.157877	16.2653	1.42787	0.279186	0.819755
NME6	-0.278017	-0.227893	-0.235473	0.216554	-0.494571	-0.444447	-0.452027	0.0501241	0.0425441	-0.00758006	18.3706	1.4275	0.279298	0.819755
CDK9	-0.105261	0.0594252	0.148619	0.221333	-0.326594	-0.161908	-0.072714	0.164686	0.25388	0.0891939	20.6313	1.42547	0.279904	0.820366
TOMM40	0.0228239	0.0377089	0.167144	-0.277236	0.30006	0.314945	0.44438	0.014885	0.14432	0.129435	20.8484	1.42481	0.280101	0.820366
ANKS1B	1.64331	0.826826	0.770793	0.229154	1.41416	0.597672	0.541639	-0.816487	-0.87252	-0.0560327	18.3959	1.42612	0.280223	0.820366
TMEM179B	-0.113134	0.176706	0.0181683	0.244346	-0.35748	-0.0676401	-0.226177	0.289839	0.131302	-0.158537	19.3828	1.42398	0.280351	0.820366
SMARCD1	-0.450767	-0.33904	0.233155	0.250419	-0.701186	-0.589458	-0.0172638	0.111727	0.683922	0.572195	18.3916	1.42396	0.280356	0.820366
ATP6V1B2	0.190514	0.0813969	0.136033	0.145929	0.0445841	-0.0645326	-0.00989617	-0.109117	-0.0544803	0.0546364	21.9033	1.42323	0.280574	0.820366
LEMD3	0.393885	-0.142047	0.109971	0.0439362	0.349949	-0.185983	0.0660344	-0.535932	-0.283915	0.252018	19.7066	1.42309	0.280618	0.820366
COQ8B	0.395623	-0.257597	-0.232931	-0.00820006	0.403823	-0.249396	-0.224731	-0.653219	-0.628554	0.0246655	18.0245	1.4228	0.280704	0.820366
MAPK7	1.41073	0.706397	-0.404313	0.275271	1.13546	0.431126	-0.679584	-0.70433	-1.81504	-1.11071	17.6714	1.42223	0.280877	0.820366
TTC4	-0.235104	-0.221421	-0.403269	-0.314701	0.0795975	0.0932807	-0.0885679	0.0136832	-0.168165	-0.181849	20.3275	1.42188	0.280982	0.820366
DPAGT1	0.0963731	-0.28205	-0.632882	-0.534901	0.631274	0.252851	-0.0979809	-0.378423	-0.729255	-0.350832	16.1738	1.421	0.281246	0.820706
SLC25A5	0.396581	-0.00907863	-0.0912091	0.0811542	0.315427	-0.0902328	-0.172363	-0.40566	-0.48779	-0.0821305	24.5706	1.42214	0.281701	0.820851
JAGN1	0.268773	0.42866	1.06981	-0.182018	0.450791	0.610678	1.25182	0.159887	0.801033	0.641147	17.9528	1.41931	0.281755	0.820851
TECR	0.0686055	-0.125725	-0.141822	-0.398196	0.466801	0.272471	0.256374	-0.19433	-0.210427	-0.0160971	21.1774	1.419	0.281848	0.820851
TRIP11	-0.273593	-0.152718	0.0965614	0.011413	-0.285006	-0.164131	0.0851483	0.120875	0.370155	0.24928	19.12	1.41792	0.282172	0.820851
GGA3	0.398663	-0.345817	-0.18639	0.149598	0.249065	-0.495415	-0.335988	-0.74448	-0.585053	0.159428	17.3447	1.41749	0.282302	0.820851
CCDC12	0.119977	0.434081	0.131114	0.37958	-0.259602	0.0545012	-0.248466	0.314103	0.0111367	-0.302967	18.7219	1.41743	0.28232	0.820851
SLC20A1	0.232988	0.222613	0.268083	0.435635	-0.202647	-0.213022	-0.167552	-0.0103753	0.0350945	0.0454697	20.0595	1.4174	0.282329	0.820851
MIOS	-0.436386	0.0939586	-0.0867269	-0.413135	-0.0232517	0.507093	0.326408	0.530345	0.34966	-0.180686	18.1591	1.41623	0.282684	0.821427
NXF1	-0.0266023	-0.114354	0.104362	-0.0497343	0.023132	-0.0646201	0.154096	-0.0877521	0.130964	0.218716	20.821	1.41577	0.282823	0.821427
VIRMA	-0.817819	-0.532959	-0.461997	-0.453649	-0.364169	-0.0793098	-0.00834707	0.28486	0.355822	0.0709627	17.7643	1.41516	0.283007	0.821532
PUM2	-0.216646	-0.340553	-0.194634	0.0546988	-0.271345	-0.395252	-0.249333	-0.123907	0.022012	0.145919	19.3065	1.41312	0.283627	0.822904
SPATS2L	-0.148794	-0.0530327	-0.221732	0.0505752	-0.199369	-0.103608	-0.272308	0.0957615	-0.0729381	-0.1687	20.4409	1.41224	0.283892	0.823242
ACTL6A	-0.2269	-0.0293727	0.0817768	-0.167672	-0.0592277	0.1383	0.249449	0.197527	0.308677	0.111149	21.8478	1.41096	0.284283	0.823667
IMPA2	-1.08376	-0.613588	0.588878	0.247489	-1.33125	-0.861077	0.341389	0.470172	1.67264	1.20247	17.1607	1.41079	0.284335	0.823667
CPSF7	0.209116	0.0831915	0.107129	0.252346	-0.0432303	-0.169155	-0.145218	-0.125925	-0.101987	0.0239372	22.4022	1.41017	0.284522	0.823781
ACY1	-0.170269	-0.12775	-0.232293	-0.0993326	-0.0709363	-0.0284178	-0.13296	0.0425186	-0.0620239	-0.104542	20.7208	1.40924	0.284805	0.823977
TRIP4	0.716136	0.233664	0.224186	0.798007	-0.0818711	-0.564343	-0.573822	-0.482472	-0.491951	-0.00947881	17.8606	1.40882	0.284935	0.823977
RAB3IL1	-0.161177	-0.608772	-0.0566039	0.416162	-0.577339	-1.02493	-0.472766	-0.447595	0.104573	0.552168	15.7088	1.40849	0.285035	0.823977
PDCD11	-0.05139	0.022932	0.0662879	-0.16981	0.11842	0.192742	0.236098	0.074322	0.117678	0.0433559	20.3707	1.4062	0.285735	0.824134
FRYL	-0.441664	-0.135111	0.080278	-0.427999	-0.0136655	0.292888	0.508277	0.306554	0.521942	0.215389	18.9243	1.40557	0.285926	0.824134
SENP3	0.106837	0.124505	0.461724	0.116648	-0.00981126	0.00785698	0.345076	0.0176682	0.354888	0.337219	20.4432	1.40522	0.286033	0.824134
DPCD	0.213288	-0.290503	-0.664711	-0.174563	0.387852	-0.11594	-0.490148	-0.503792	-0.877999	-0.374208	19.2426	1.40479	0.286166	0.824134
SLFN5	0.346325	0.145929	0.0853607	0.710557	-0.364233	-0.564628	-0.625197	-0.200395	-0.260964	-0.0605688	15.597	1.40409	0.286379	0.824134
ZADH2	0.700606	0.78971	0.626348	-0.123255	0.823861	0.912965	0.749603	0.0891038	-0.0742577	-0.163362	17.8475	1.40269	0.286809	0.824134
MTHFR	0.508649	-0.0507156	0.657535	0.152432	0.356217	-0.203148	0.505102	-0.559364	0.148886	0.70825	20.3139	1.40494	0.286925	0.824134
RYBP	0.251332	0.353196	0.446961	0.545798	-0.294466	-0.192602	-0.0988367	0.101864	0.195629	0.0937648	19.4971	1.40226	0.286941	0.824134
DPM3	0.13984	-0.0317617	-0.0648594	0.471148	-0.331307	-0.502909	-0.536007	-0.171602	-0.2047	-0.0330977	19.4316	1.40173	0.287105	0.824134
NAA15	-0.0574947	0.085654	0.0604981	-0.157979	0.100485	0.243633	0.218478	0.143149	0.117993	-0.0251559	21.1828	1.40171	0.287111	0.824134
RNASEH2C	1.14008	0.202918	-0.454748	-0.0821311	1.22221	0.28505	-0.372617	-0.937163	-1.59483	-0.657666	19.1959	1.40896	0.287195	0.824134
ITIH2	-1.42695	-0.991209	-0.595252	-1.27829	-0.148669	0.287077	0.683034	0.435746	0.831702	0.395957	19.1804	1.40777	0.287236	0.824134
COX7C	-0.419778	0.961152	-0.474835	-0.325755	-0.0940227	1.28691	-0.149081	1.38093	-0.0550579	-1.43599	19.1215	1.4079	0.287238	0.824134
MCM4	-0.0659039	0.0719836	-0.0634007	0.00841784	-0.0743217	0.0635658	-0.0718185	0.137887	0.00250323	-0.135384	22.5928	1.40125	0.287252	0.824134
FGF2	-0.910457	-1.8472	-1.11757	-1.82582	0.915363	-0.0213832	0.708245	-0.936746	-0.207118	0.729628	17.8754	1.4027	0.287313	0.824134
ATP1B1	0.265054	-0.19169	-0.11065	0.0130444	0.25201	-0.204735	-0.123694	-0.456745	-0.375704	0.0810405	21.3325	1.40022	0.287569	0.824442
RHBDF2	0.701049	0.683204	1.30741	0.786865	-0.0858163	-0.103661	0.52054	-0.0178443	0.606356	0.624201	16.1135	1.39951	0.287787	0.824442
CHMP2A	1.85349	0.269328	0.207509	0.208662	1.64483	0.060666	-0.00115331	-1.58417	-1.64599	-0.0618193	20.2547	1.41752	0.288293	0.824442
PGM2L1	-0.350332	0.137538	-0.270347	-0.0236352	-0.326696	0.161173	-0.246712	0.48787	0.0799847	-0.407885	20.1357	1.39726	0.288482	0.824442
PGM1	0.179598	0.169837	0.26389	0.260412	-0.0808135	-0.0905743	0.00347843	-0.00976075	0.0842919	0.0940527	21.9392	1.39699	0.288565	0.824442
DMAP1	-0.228687	-0.287906	-0.152941	-0.123203	-0.105484	-0.164702	-0.0297373	-0.0592187	0.0757462	0.134965	19.7048	1.39612	0.288834	0.824442
AP1G2	-2.00548	-1.10602	0.159577	-0.708528	-1.29695	-0.397491	0.868105	0.899458	2.16505	1.2656	17.5894	1.39775	0.288835	0.824442
ARHGEF11	-0.286381	-0.945547	0.247985	-0.505361	0.21898	-0.440186	0.753346	-0.659166	0.534366	1.19353	16.5006	1.39594	0.28889	0.824442
NT5C	-0.182191	0.0831833	-0.214015	-0.0175597	-0.164632	0.100743	-0.196455	0.265375	-0.0318234	-0.297198	20.0582	1.39513	0.289141	0.824442
CWC27	0.0400301	-0.0290535	-0.267396	-0.0457856	0.0858157	0.0167321	-0.22161	-0.0690836	-0.307426	-0.238342	20.273	1.39495	0.289195	0.824442
UBE2Q1	0.704027	0.761205	0.441796	0.278958	0.425069	0.482248	0.162838	0.0571782	-0.262231	-0.31941	18.5474	1.39366	0.289596	0.824442
RHOA	0.0458993	0.150644	1.18366	0.150388	-0.104489	0.000255135	1.03327	0.104744	1.13776	1.03302	22.0712	1.40946	0.289625	0.824442
PNPT1	0.000842919	-0.18382	-0.218698	-0.156218	0.157061	-0.0276018	-0.0624803	-0.184663	-0.219541	-0.0348785	21.8248	1.39329	0.289709	0.824442
MAP4K5	0.142745	0.350308	-0.138717	0.196432	-0.0536871	0.153877	-0.335149	0.207564	-0.281462	-0.489025	18.4857	1.39316	0.28975	0.824442
GPN1	-0.224448	0.300025	0.0689543	-0.00359625	-0.220851	0.303621	0.0725506	0.524473	0.293402	-0.231071	19.1677	1.39292	0.289827	0.824442
SMARCC1	-0.0259904	0.0478723	0.164767	4.69301e-05	-0.0260373	0.0478253	0.16472	0.0738626	0.190757	0.116895	22.2868	1.39258	0.289929	0.824442
BBX	0.704747	0.166223	0.332848	0.104939	0.599808	0.0612835	0.227909	-0.538524	-0.371899	0.166625	18.8267	1.39235	0.290004	0.824442
NOP2	0.0839087	0.0435203	0.030113	-0.0887982	0.172707	0.132318	0.118911	-0.0403885	-0.0537958	-0.0134073	22.3556	1.39173	0.290196	0.824442
SRPRA	-0.114876	-0.145521	-0.168918	-0.0669651	-0.0479106	-0.0785562	-0.101953	-0.0306456	-0.0540428	-0.0233972	21.4681	1.39159	0.290238	0.824442
ITGB5	0.237088	-0.105177	-0.17779	0.0914011	0.145687	-0.196578	-0.269191	-0.342265	-0.414879	-0.0726132	20.1822	1.39111	0.290388	0.824448
IST1	0.111135	0.0683887	0.158982	0.220151	-0.109015	-0.151762	-0.0611686	-0.0427466	0.0478467	0.0905934	20.8547	1.38982	0.290791	0.824635
CTBP2	-0.337252	0.0219969	1.27254	-0.082475	-0.254777	0.104472	1.35501	0.359249	1.60979	1.25054	19.4934	1.39961	0.290869	0.824635
XPNPEP3	-0.665464	-0.743702	0.610753	-0.713444	0.0479799	-0.0302584	1.3242	-0.0782383	1.27622	1.35446	19.063	1.39556	0.29097	0.824635
HCFC1	0.164977	-0.0912176	0.0863326	0.0666038	0.0983728	-0.157821	0.0197288	-0.256194	-0.078644	0.17755	22.6711	1.38899	0.291048	0.824635
ZZEF1	1.43627	0.479978	0.965541	1.4364	-0.000128772	-0.95642	-0.470857	-0.956291	-0.470728	0.485563	16.5385	1.38661	0.291791	0.825486
BSG	-0.117102	-0.117935	-0.238849	-0.194478	0.0773758	0.0765433	-0.0443709	-0.000832514	-0.121747	-0.120914	23.5067	1.38619	0.291921	0.825486
LGALS8	0.491599	0.450743	0.211863	0.523141	-0.0315428	-0.0723982	-0.311279	-0.0408553	-0.279736	-0.238881	19.7044	1.38613	0.291942	0.825486
UBE2M	0.00923966	0.0150685	0.21827	-0.0697232	0.0789628	0.0847917	0.287993	0.00582885	0.20903	0.203201	21.4781	1.38613	0.291942	0.825486
AKAP9	-0.459701	-0.35399	-0.310966	-0.236495	-0.223205	-0.117495	-0.0744707	0.10571	0.148735	0.0430242	18.3631	1.38463	0.29241	0.826258
ARL6IP5	0.153134	-0.186024	-0.0313886	0.0180862	0.135048	-0.20411	-0.0494747	-0.339158	-0.184523	0.154635	20.6278	1.38324	0.292847	0.826258
DYNLL1	2.88488	0.38907	0.458684	0.641648	2.24324	-0.252578	-0.182964	-2.49581	-2.4262	0.0696138	22.3591	1.41369	0.29289	0.826258
PTGFRN	-0.085751	-0.185576	-0.271341	0.0666497	-0.152401	-0.252226	-0.337991	-0.0998254	-0.18559	-0.0857648	20.3015	1.38191	0.293263	0.826258
CMTR1	-0.292471	-0.180288	-0.386505	-0.392399	0.0999283	0.212112	0.00589407	0.112183	-0.0940342	-0.206218	19.2842	1.38119	0.29349	0.826258
STRIP1	-0.0693278	0.0962296	0.156215	0.0790387	-0.148366	0.0171909	0.0771767	0.165557	0.225543	0.0599857	20.0251	1.38031	0.293767	0.826258
MGAT2	0.292669	0.0191098	0.0505808	-0.0919527	0.384621	0.111062	0.142534	-0.273559	-0.242088	0.0314711	21.0024	1.37972	0.293952	0.826258
PINX1	-0.482997	0.139246	-0.217034	-0.233607	-0.24939	0.372854	0.0165738	0.622243	0.265963	-0.35628	19.3187	1.37963	0.293981	0.826258
CYBC1	-1.75149	-0.693556	0.175133	0.659588	-2.41107	-1.35314	-0.484455	1.05793	1.92662	0.868689	17.3327	1.38093	0.294069	0.826258
DIABLO	-0.0632	-0.291067	-0.0471857	0.0541936	-0.117394	-0.34526	-0.101379	-0.227867	0.0160143	0.243881	21.0473	1.37923	0.294106	0.826258
DARS1	-0.0219202	0.0976589	0.0477916	-0.161753	0.139833	0.259412	0.209545	0.119579	0.0697118	-0.0498673	23.3755	1.37921	0.294112	0.826258
CLN3	-0.145247	-0.942238	-0.357295	0.344379	-0.489626	-1.28662	-0.701674	-0.796991	-0.212048	0.584943	17.3511	1.37852	0.294332	0.826258
LARP4	-0.124619	0.0397427	-0.215127	0.0370746	-0.161694	0.0026681	-0.252201	0.164362	-0.0905077	-0.254869	20.7927	1.37835	0.294384	0.826258
PDXK	0.0648906	-0.133263	-0.0246313	-0.0369967	0.101887	-0.0962662	0.0123655	-0.198154	-0.0895218	0.108632	21.9474	1.37834	0.294388	0.826258
TUT7	-2.28266	-4.1913	-2.26846	-4.13074	1.84809	-0.0605539	1.86228	-1.90864	0.0141994	1.92284	20.2728	1.40729	0.294801	0.826258
MED23	-0.862135	0.352875	0.170655	-0.0279623	-0.834173	0.380837	0.198617	1.21501	1.03279	-0.18222	16.8298	1.37574	0.295207	0.826258
PA2G4	-0.0939993	0.0352012	-0.071203	-0.0819631	-0.0120362	0.117164	0.0107601	0.129201	0.0227963	-0.106404	23.7388	1.3753	0.295348	0.826258
FGFR1OP	-0.26429	0.106246	-0.141799	0.0450472	-0.309337	0.0611986	-0.186846	0.370536	0.122491	-0.248044	19.591	1.37486	0.295488	0.826258
LRP12	0.682281	0.93523	1.00693	0.796564	-0.114283	0.138666	0.210371	0.252949	0.324654	0.0717049	16.1275	1.37468	0.295545	0.826258
NELFA	-0.00941354	-0.185445	-0.221881	-0.224086	0.214673	0.0386414	0.00220486	-0.176031	-0.212468	-0.0364366	19.9284	1.37447	0.295612	0.826258
CREBBP	0.0682759	-0.180003	0.154126	0.297707	-0.229431	-0.477709	-0.14358	-0.248279	0.0858504	0.334129	18.6265	1.37433	0.295654	0.826258
MB21D2	-0.449643	-0.26504	-0.450299	-0.459938	0.0102943	0.194897	0.00963901	0.184603	-0.000655309	-0.185258	19.3772	1.37414	0.295715	0.826258
CSTB	0.341934	-0.0206006	0.373926	0.330155	0.0117795	-0.350756	0.0437714	-0.362535	0.0319919	0.394527	21.9555	1.37549	0.295785	0.826258
FOXRED1	-0.38365	-0.415457	-0.454587	0.159474	-0.543124	-0.574931	-0.614061	-0.031807	-0.0709372	-0.0391302	20.3376	1.37519	0.295879	0.826258
APP	0.305928	0.0643393	0.362766	0.216283	0.0896443	-0.151944	0.146483	-0.241588	0.0568384	0.298427	20.8743	1.37346	0.295931	0.826258
CD99L2	-0.102427	-0.00235611	-0.616568	0.106662	-0.209089	-0.109018	-0.72323	0.100071	-0.514141	-0.614212	18.2912	1.37271	0.296168	0.826505
SMOC1	-0.354061	0.119033	0.136431	-0.781072	0.427011	0.900105	0.917503	0.473094	0.490492	0.0173979	16.0791	1.37207	0.296373	0.826663
SPECC1L	-0.258322	-0.12387	-0.18605	-0.100842	-0.15748	-0.0230281	-0.0852073	0.134452	0.0722725	-0.0621791	19.9793	1.37142	0.296577	0.826816
ALDH16A1	-0.123677	0.0572708	-0.15169	-0.0587373	-0.0649397	0.116008	-0.0929528	0.180948	-0.028013	-0.208961	20.9208	1.37001	0.297028	0.827113
ARIH1	-0.548184	0.224147	0.093184	-0.240189	-0.307995	0.464336	0.333373	0.772331	0.641368	-0.130963	19.1508	1.36974	0.297113	0.827113
TAF15	1.14118	0.0912174	-0.207043	0.5102	0.630981	-0.418983	-0.717243	-1.04996	-1.34822	-0.29826	18.4889	1.37044	0.29713	0.827113
KDM2A	0.971853	-0.0681119	0.503239	-0.00463943	0.976492	-0.0634725	0.507878	-1.03996	-0.468614	0.57135	18.2324	1.36905	0.297332	0.827134
TMX4	-0.369097	0.0765231	0.0511087	-0.161506	-0.207591	0.238029	0.212614	0.44562	0.420205	-0.0254144	19.9969	1.36873	0.297435	0.827134
[truncated: 3,560 more rows]
