# Supplementary material for: Genome-wide CRISPRi screening identifies OCIAD1 as a prohibitin client and regulatory determinant of mitochondrial Complex III assembly in human cells
Source: eLife. 2021 May 26;10:e67624. doi: 10.7554/eLife.67624 (PMC8154037; doi:10.7554/eLife.67624)
Supplement: Figure 5—source data 1. [file elife-67624-fig5-data1.xlsx]

## Sheet: WT rescue vs F102A rescue
Genes	log2FC	AveExpr	t	P.Value	adj.P.Val	-LOG10(adj.P.value)
CYC1	5.31072	18.047	15.8021	8.74e-06	0.00418308	2.3785
MRPS27	4.43743	19.0453	2.92167	0.0295076	0.166357	0.778958
IDH3A	3.99432	17.3888	13.4673	2.06e-05	0.0049264	2.30747
MRPS14	3.77381	18.8425	2.90378	0.0301659	0.166376	0.778908
UQCRQ	3.37093	17.0771	10.6004	7.35e-05	0.0107913	1.96693
HSPB1	3.21681	18.9859	2.03402	0.0925904	0.253387	0.596216
CYB5R3	3.18823	18.5476	2.71017	0.0384138	0.184928	0.732998
CS	3.0644	16.9239	10.5519	7.53e-05	0.0107913	1.96693
DNAJA3	3.01733	18.0074	3.23318	0.0202508	0.138284	0.859228
BCKDHA	2.95534	16.8693	9.70182	0.000116897	0.0111668	1.95207
SUPV3L1	2.9103	16.8468	9.39139	0.000138507	0.0111668	1.95207
C1QBP	2.81119	20.8644	1.46413	0.197984	0.376537	0.424193
MRPL15	2.7843	17.563	5.19838	0.00264105	0.0548803	1.26058
MAIP1	2.74951	18.0333	2.56926	0.0459511	0.191994	0.716712
CLIC1	2.73206	18.358	2.25238	0.0693478	0.218081	0.661383
MRPL37	2.72445	17.4005	4.81925	0.00374936	0.0629509	1.201
MRPS15	2.64967	17.7772	2.99647	0.0269212	0.16358	0.786269
COX4I1	2.56595	16.6746	6.19282	0.00114213	0.037223	1.42919
UQCRB	2.48976	17.1181	3.61167	0.0130791	0.117018	0.931746
BAX	2.48661	19.4293	1.78086	0.129836	0.298514	0.525035
RAN	2.48254	22.2601	0.960122	0.377372	0.534781	0.271824
ATAD3B	2.43577	20.6281	1.28038	0.251873	0.420963	0.375756
NIPSNAP1	2.43401	19.7316	1.57352	0.171246	0.346852	0.459856
RHOT1	2.39734	19.261	1.73347	0.138332	0.314668	0.502147
MRPL50	2.38849	20.2252	1.46672	0.197308	0.376249	0.424525
HINT2	2.3859	17.2077	2.91013	0.0299304	0.166357	0.778958
DNAJC19	2.3778	17.7434	2.32479	0.0630636	0.207658	0.682651
DAP3	2.32004	17.4368	5.47539	0.00206769	0.0502077	1.29923
MRPS18B	2.30789	19.5956	1.54331	0.178264	0.352108	0.453324
PDK1	2.30445	16.5439	7.78425	0.000364298	0.0208822	1.68022
APOO	2.24059	17.5434	2.60159	0.0440905	0.190439	0.720244
LAP3	2.20626	16.4948	5.14011	0.00278388	0.0554457	1.25613
ALDH4A1	2.13563	17.7809	2.56293	0.0463249	0.191994	0.716712
MRPL49	2.12196	17.4821	2.35661	0.0604955	0.206094	0.685935
SAMM50	2.08681	19.9281	1.23949	0.265549	0.435826	0.360687
ABCF1	2.0578	16.4206	6.73997	0.000752276	0.0293184	1.53286
TIMM50	2.0484	19.4325	1.49677	0.189617	0.367101	0.435215
FDXR	2.02882	18.1222	2.12579	0.081965	0.23602	0.627052
ARMCX3	2.00787	17.6308	2.71811	0.038031	0.184928	0.732998
MRPL34	2.00014	18.3635	7.29647	0.000505639	0.0226589	1.64476
ECI2	1.99419	17.0478	2.0954	0.085336	0.240889	0.618182
PTCD3	1.97007	18.053	2.11128	0.0835571	0.239642	0.620438
MRPL51	1.95974	16.3715	5.36709	0.00227283	0.0502077	1.29923
MRPS36	1.95451	17.1417	3.63089	0.0127997	0.117018	0.931746
VWA8	1.95166	18.4779	1.98441	0.0989173	0.262728	0.580494
HADH	1.81011	18.728	1.61523	0.161993	0.337642	0.471544
MRPS10	1.79613	18.0259	2.88038	0.0310512	0.167396	0.776255
MTFR1L	1.75394	18.4766	1.67817	0.148942	0.325583	0.487338
H1-10	1.74476	16.264	3.7956	0.0106617	0.114227	0.942233
DECR1	1.74339	16.6757	2.62526	0.0427795	0.18703	0.728089
TOMM40	1.74257	17.9794	2.13582	0.080883	0.23479	0.629321
MRPS34	1.73377	18.6956	2.41576	0.0560114	0.202712	0.69312
DBN1	1.70147	16.4456	1.60969	0.163192	0.338627	0.470278
SLC25A5	1.67598	19.3469	1.10169	0.316564	0.478853	0.319798
OXCT1	1.6525	17.7716	2.20621	0.0736957	0.22678	0.644394
VPS35	1.65223	19.4992	1.02359	0.349025	0.504653	0.297007
CLPB	1.62617	18.4958	1.54039	0.178957	0.352506	0.452833
GCAT	1.62116	18.0805	2.44125	0.0541899	0.202712	0.69312
MTHFD1L	1.59365	18.5393	2.16747	0.0775653	0.232319	0.633914
PDHA1	1.58981	18.5701	1.42275	0.209094	0.387149	0.412121
OPA1	1.57751	23.9445	9.44834	0.000134213	0.0111668	1.95207
ATXN2L	1.55536	18.7901	1.17542	0.288302	0.453936	0.343005
MARS1	1.55334	19.3322	1.09003	0.321245	0.481868	0.317072
OAT	1.53205	16.9926	2.51073	0.0495377	0.199127	0.700871
MRPL28	1.52292	18.0477	1.50949	0.186446	0.363266	0.439775
PDIA4	1.52177	19.2142	1.09426	0.319539	0.481322	0.317564
SDF2L1	1.50223	16.4005	2.75603	0.0362592	0.180004	0.744718
GTF2I	1.49215	16.7946	1.59191	0.167103	0.34429	0.463075
RPL10A	1.48727	17.9551	1.42844	0.207532	0.385494	0.413983
NSDHL	1.48685	16.1351	4.94423	0.00333352	0.0606545	1.21714
BCKDK	1.48232	17.0448	1.89409	0.111593	0.280658	0.551822
RCC1L	1.47752	17.7559	1.86106	0.116631	0.286384	0.543051
SLC25A24	1.45998	18.8192	1.15279	0.296736	0.461518	0.335811
STOM	1.41805	18.1389	1.46789	0.197003	0.376249	0.424525
RRBP1	1.41523	16.8964	2.45507	0.0532286	0.202712	0.69312
MRPL20	1.40901	18.3448	2.3938	0.0576338	0.203564	0.6913
CHCHD3	1.40498	18.528	1.14159	0.300989	0.463137	0.334291
PNPT1	1.40048	18.4777	7.94951	0.000327295	0.0208822	1.68022
PSMD6	1.3998	19.4378	0.930747	0.391101	0.545563	0.263155
SUB1	1.39939	17.2259	1.62524	0.159845	0.337084	0.472262
BUB3	1.39497	19.6545	0.80952	0.451884	0.598893	0.222651
PPOX	1.38511	17.7721	2.68623	0.039594	0.184928	0.732998
SCCPDH	1.36883	17.4151	1.71791	0.141239	0.317456	0.498316
STT3B	1.35376	17.1012	1.81616	0.12385	0.292106	0.53446
BCS1L	1.30488	17.8716	2.35466	0.0606497	0.206094	0.685935
FKBP8	1.29338	18.5762	1.31689	0.240201	0.415383	0.381551
ACADS	1.28173	17.3797	1.62182	0.160575	0.337631	0.471557
ALDH1B1	1.26038	17.3679	1.86287	0.116349	0.286384	0.543051
MRM2	1.25734	17.3382	3.56185	0.0138362	0.118764	0.925313
PSMA5	1.2511	18.4653	1.00798	0.35583	0.511283	0.291338
MRPL17	1.24221	20.4368	5.56531	0.00191349	0.0493088	1.30708
SLC25A46	1.23697	16.8072	1.11422	0.311599	0.475237	0.32309
SARNP	1.23518	19.5682	0.961526	0.376725	0.534781	0.271824
MFN1	1.23218	19.7667	2.19541	0.0747535	0.228078	0.641917
GFM1	1.22481	18.3292	4.19178	0.00698723	0.091088	1.04054
FSCN1	1.22257	18.2183	1.19169	0.282366	0.450104	0.346687
RPS25	1.2046	18.6328	1.28832	0.249293	0.420336	0.376404
PCCA	1.1701	17.7823	1.30467	0.244051	0.41564	0.381282
PDE12	1.15762	18.7648	1.19673	0.280551	0.449006	0.347748
MRPL47	1.14394	20.7911	5.85258	0.00150299	0.0431057	1.36547
MRPL57	1.13785	19.1414	7.08664	0.00058556	0.0246969	1.60736
SUPT16H	1.10723	18.6946	0.813547	0.449758	0.598594	0.222868
TIMM10B	1.08989	16.8579	2.48034	0.0515178	0.199488	0.700084
RAB10	1.07652	17.4747	1.41408	0.211494	0.388824	0.410247
UQCRC1	1.06468	22.5057	4.6456	0.00442987	0.069798	1.15616
MRPS23	1.04537	19.6647	6.34018	0.00101779	0.036251	1.44068
POLR1D	1.04186	17.5014	1.16206	0.293257	0.457098	0.33999
MRPL18	1.03943	20.3466	4.99813	0.00317074	0.0601522	1.22075
CLN6	1.03104	18.2331	1.23031	0.26871	0.436882	0.359636
MFN2	1.0303	20.6628	3.97761	0.00875449	0.102901	0.98758
VDAC1	1.02813	21.2409	2.92248	0.029478	0.166357	0.778958
EDC4	1.02588	17.7194	0.955873	0.379334	0.535398	0.271323
PTPN1	1.02461	17.4349	1.31352	0.241257	0.415383	0.381551
HYOU1	1.01748	18.5893	0.753487	0.482225	0.625236	0.203956
TRA2A	1.00471	18.0379	0.844329	0.43375	0.583487	0.233969
HSD17B12	0.995103	18.399	0.830699	0.440785	0.590734	0.228608
UQCRC2	0.990231	21.3049	5.37604	0.00225501	0.0502077	1.29923
SUCLG2	0.986471	16.7079	3.30776	0.0185463	0.131661	0.880544
SPTBN1	0.981544	16.6781	1.36223	0.22639	0.405804	0.391684
MRPL45	0.979722	20.2895	5.18257	0.00267896	0.0548803	1.26058
KIAA1143	0.967436	16.9212	1.44301	0.203583	0.384054	0.415608
PITRM1	0.963584	18.8436	2.53976	0.0477227	0.196651	0.706305
MRPL39	0.961247	20.3174	4.49915	0.00511528	0.0737687	1.13213
MRPL22	0.954521	18.1502	1.83035	0.12152	0.291404	0.535504
IMPDH2	0.954279	18.213	0.869904	0.420776	0.57466	0.240589
PCMT1	0.951923	18.1459	0.811171	0.451012	0.598843	0.222687
MRPL13	0.948144	20.9161	5.74061	0.00164952	0.0454888	1.3421
EMC4	0.944388	17.399	1.0347	0.344245	0.503151	0.298301
MRPL2	0.940614	20.5869	6.6964	0.000776916	0.0293184	1.53286
EIF4ENIF1	0.930342	16.7424	1.03397	0.344557	0.503151	0.298301
RPL17	0.923231	19.556	0.682034	0.522947	0.659032	0.181094
NDUFB10	0.922924	19.167	2.43076	0.0549319	0.202712	0.69312
CSN1S2	0.911145	19.1018	0.668144	0.531124	0.662288	0.178953
MRPL9	0.901874	19.9126	5.55796	0.00192559	0.0493088	1.30708
MRPL11	0.898847	21.5485	5.34827	0.00231082	0.0502077	1.29923
MRPS21	0.891133	18.5294	1.92569	0.10698	0.272971	0.563883
TALDO1	0.889738	18.4948	0.73067	0.494983	0.636027	0.196525
MRPL48	0.884723	19.336	4.47356	0.00524715	0.0737687	1.13213
MRPL27	0.882561	21.101	4.52208	0.00500037	0.0737687	1.13213
ACADM	0.877267	21.063	3.55691	0.0139138	0.118764	0.925313
MRPS22	0.876186	19.4195	4.83872	0.00368083	0.0629509	1.201
DLST	0.864622	18.4401	1.95987	0.102209	0.266918	0.573622
DNAJC11	0.858889	21.4355	3.41496	0.0163696	0.125417	0.901643
MRPS31	0.855196	20.2589	3.75474	0.0111518	0.114227	0.942233
TRAP1	0.85065	22.8156	6.02398	0.00130688	0.0407405	1.38997
HADHB	0.843041	21.2618	3.0025	0.0267238	0.16358	0.786269
GCDH	0.834015	18.8391	3.62102	0.0129423	0.117018	0.931746
CDC42EP1	0.833006	17.8338	1.23926	0.265629	0.435826	0.360687
MRPS11	0.826143	18.1443	3.31607	0.0183665	0.131661	0.880544
PCK2	0.823281	21.7173	3.25426	0.0197521	0.137419	0.861952
ANAPC1	0.822075	17.9762	0.814723	0.449139	0.598594	0.222868
MRPS9	0.81874	19.4648	3.44752	0.0157661	0.124223	0.905797
ETFB	0.815144	20.496	4.27322	0.00642452	0.0869128	1.06092
RTF1	0.805691	17.3877	0.848148	0.431794	0.583043	0.234299
MRPL41	0.803672	22.3963	4.99227	0.00318798	0.0601522	1.22075
ALYREF	0.800691	17.8583	0.798229	0.457884	0.603914	0.219025
MRPL4	0.799773	17.8248	0.716779	0.502863	0.643845	0.191219
GADD45GIP1	0.782553	21.3009	4.92819	0.00338379	0.0606545	1.21714
SNX2	0.781928	17.3859	1.01597	0.352335	0.508298	0.293882
AP3B1	0.780592	17.8991	0.689771	0.518429	0.656738	0.182608
ATP5PD	0.771144	21.3596	4.11157	0.00759676	0.0954514	1.02022
MRPL55	0.76799	18.6746	3.6734	0.0122051	0.116847	0.932381
MRPL24	0.761396	20.125	5.38865	0.00223017	0.0502077	1.29923
PPP1CA	0.759755	16.779	1.16348	0.292726	0.457098	0.33999
SHMT2	0.758398	22.3517	3.75701	0.011124	0.114227	0.942233
TOMM70	0.755056	20.4877	1.82216	0.12286	0.292106	0.53446
LARS2	0.744785	18.2814	3.40199	0.0166173	0.125417	0.901643
RAB14	0.743196	17.9406	2.43869	0.0543696	0.202712	0.69312
GFER	0.736295	17.0686	0.899948	0.405913	0.559692	0.252051
OGDH	0.733863	21.3224	2.14624	0.0797743	0.232513	0.633553
SDHA	0.732606	20.3841	4.77201	0.00392182	0.0639079	1.19445
YARS2	0.731949	20.0668	2.33758	0.0620175	0.206821	0.684405
SIRT2	0.729496	15.8942	1.61646	0.161726	0.337642	0.471544
NDUFB1	0.726887	20.1321	1.9654	0.101458	0.266918	0.573622
RMDN1	0.725968	18.5433	1.50692	0.187084	0.36352	0.439471
YME1L1	0.725649	22.5749	2.62568	0.0427566	0.18703	0.728089
MRPS35	0.724705	20.2328	4.22938	0.00672071	0.0892361	1.04946
MRPL14	0.724266	19.5192	3.81831	0.0103999	0.114227	0.942233
ENDOG	0.72176	21.0268	2.42762	0.0551559	0.202712	0.69312
VDAC3	0.720407	20.7919	2.79623	0.0344782	0.179137	0.746815
NDUFAF2	0.71994	20.4126	3.33916	0.0178771	0.12985	0.886557
TIMM10	0.715579	18.6123	4.0764	0.00788299	0.0957984	1.01864
SUPT5H	0.714025	18.0073	0.681949	0.522997	0.659032	0.181094
DNM1L	0.713449	23.7477	2.41233	0.0562618	0.202712	0.69312
ACAT1	0.701067	20.0194	3.76071	0.0110786	0.114227	0.942233
ATP5MG	0.684813	20.9318	3.24656	0.0199325	0.137419	0.861952
FOXRED1	0.682878	20.4536	4.6345	0.00447797	0.069798	1.15616
ACAA2	0.674821	18.172	3.40273	0.0166029	0.125417	0.901643
LONP1	0.674033	19.206	2.75289	0.0364025	0.180004	0.744718
MRPL23	0.671513	20.9763	3.45047	0.0157128	0.124223	0.905797
TOMM20	0.671091	19.1311	3.74094	0.0113231	0.114347	0.941774
IGF2BP2	0.664569	16.786	0.758769	0.479304	0.624838	0.204232
RAB7A	0.659281	18.9593	3.05823	0.024973	0.154359	0.811469
PMPCB	0.652387	18.348	2.10305	0.0844747	0.240351	0.619155
RAB1A	0.65221	17.4605	0.790014	0.462286	0.608181	0.215967
DTYMK	0.65017	18.1164	1.98427	0.0989351	0.262728	0.580494
ABCB10	0.649996	16.7985	1.72948	0.139072	0.314668	0.502147
HSPA4	0.645613	17.3104	0.684325	0.521607	0.659032	0.181094
VDAC2	0.639238	23.6653	2.68176	0.0398186	0.184928	0.732998
PDHB	0.635086	20.6085	2.92833	0.0292666	0.166357	0.778958
ATP5F1B	0.632886	24.9805	3.36718	0.0173026	0.127897	0.893141
SART3	0.630737	17.9755	0.523494	0.621086	0.734849	0.133802
ARMC1	0.630082	19.5639	1.83833	0.120231	0.289602	0.538198
COX6B1	0.627807	19.3304	1.0234	0.349104	0.504653	0.297007
HK1	0.626094	19.5092	2.17442	0.0768554	0.232319	0.633914
CLPX	0.62396	19.6067	1.70497	0.143704	0.319618	0.495368
RHOT2	0.623922	20.3769	2.23943	0.0705397	0.218948	0.659659
ACO2	0.62361	21.2276	4.47788	0.0052246	0.0737687	1.13213
HSD17B10	0.623406	21.7372	3.80273	0.0105787	0.114227	0.942233
MRPL12	0.620912	19.5585	4.30055	0.00624739	0.0861419	1.06479
ALDH18A1	0.619574	21.6605	1.05995	0.333582	0.493923	0.306341
ATP5PO	0.61785	23.6985	3.19279	0.0212459	0.143566	0.842948
TPD52L2	0.617658	16.7727	0.846515	0.432629	0.583074	0.234276
TIMM29	0.611806	19.3509	1.69888	0.144877	0.320608	0.494026
IARS2	0.610482	21.17	2.02636	0.0935397	0.254719	0.593938
HADHA	0.607186	24.682	3.12157	0.0231356	0.149444	0.825523
MRPS28	0.599132	21.2867	3.76397	0.0110389	0.114227	0.942233
PYCR1	0.589003	21.3986	2.66582	0.0406308	0.184928	0.732998
PCCB	0.58804	19.0888	2.77649	0.0353404	0.180004	0.744718
ECHS1	0.586228	19.7205	1.71381	0.142015	0.318203	0.497296
EPB41	0.585589	18.2321	0.678216	0.525187	0.659409	0.180845
EXOC7	0.584646	16.3024	1.22331	0.271138	0.439833	0.356712
MDH2	0.582129	22.9266	2.63409	0.0423016	0.18703	0.728089
TSFM	0.577818	20.3867	1.95866	0.102374	0.266918	0.573622
ATP5ME	0.575055	22.4066	2.92731	0.0293032	0.166357	0.778958
ATP5MF	0.573187	18.4639	1.80835	0.125149	0.294204	0.531352
UBXN1	0.571824	17.3431	0.674217	0.527539	0.660114	0.180381
CRKL	0.561356	17.4918	0.566382	0.593523	0.71306	0.146874
HSPD1	0.560808	24.0589	2.91579	0.0297219	0.166357	0.778958
FH	0.557434	21.0491	2.31038	0.0642647	0.208497	0.680901
NDUFA2	0.550701	19.2165	2.52742	0.0484851	0.19865	0.701911
ATP5F1A	0.55041	23.7281	3.4317	0.0160562	0.125134	0.902625
AARS2	0.544911	19.3435	2.85345	0.0321054	0.169457	0.77094
IMMP2L	0.541634	19.1414	1.79635	0.127175	0.296053	0.528631
ATP5F1C	0.539468	22.2263	3.56684	0.0137581	0.118764	0.925313
TARS2	0.537441	19.5297	2.66336	0.0407577	0.184928	0.732998
IDH3B	0.53709	19.5771	2.65316	0.0412886	0.184928	0.732998
CCDC51	0.533085	19.3001	2.05286	0.0902982	0.249976	0.602101
CFL1	0.528907	18.4578	1.1877	0.283815	0.450104	0.346687
ALDH6A1	0.523415	18.5924	1.55506	0.175501	0.351314	0.454304
PC	0.518623	21.1496	1.81725	0.123668	0.292106	0.53446
AK4	0.506962	18.352	1.65108	0.154428	0.329744	0.481823
RPL22	0.499082	22.802	1.0373	0.343132	0.503121	0.298328
ACOT7	0.498148	17.8698	0.669809	0.530139	0.662213	0.179003
MCCC2	0.491291	19.9574	2.51801	0.0490753	0.199127	0.700871
NNT	0.489876	19.6187	2.23971	0.0705135	0.218948	0.659659
MTHFD2	0.479592	18.9926	1.82505	0.122385	0.292106	0.53446
TIMM44	0.474994	19.2203	1.43701	0.205201	0.385155	0.414365
HSPA9	0.474194	24.2456	3.24939	0.0198659	0.137419	0.861952
ETFA	0.472211	20.4282	2.69398	0.0392074	0.184928	0.732998
PAM16	0.469237	19.3703	1.66247	0.152098	0.327666	0.484568
NDUFS2	0.466076	21.3838	3.33667	0.0179291	0.12985	0.886557
MT-CO2	0.452312	22.0354	2.89215	0.0306024	0.167062	0.777122
PYCR2	0.449404	19.4881	2.95093	0.0284647	0.166357	0.778958
PRDX3	0.446566	20.0153	1.69399	0.145827	0.32073	0.49386
NDUFA10	0.444506	20.8354	2.4776	0.0516999	0.199488	0.700084
IMMT	0.441213	23.3306	2.37238	0.0592636	0.206094	0.685935
DDX20	0.440972	17.3796	0.473705	0.653967	0.767823	0.114739
APOOL	0.438499	21.3798	1.85653	0.117339	0.287141	0.541904
STOML2	0.436003	22.2427	2.508	0.0497122	0.199127	0.700871
SLC25A6	0.43523	18.6973	1.34383	0.231904	0.411572	0.385554
PRMT5	0.433241	17.7324	0.421238	0.68958	0.792354	0.101081
RAB5A	0.429814	18.3408	1.88131	0.113516	0.280658	0.551822
AK2	0.427951	23.5856	2.78141	0.0351233	0.180004	0.744718
DPYSL2	0.427161	17.3971	1.3356	0.23441	0.412954	0.384098
UGGT1	0.420109	15.6017	1.00514	0.357079	0.512052	0.290686
HSPE1	0.418962	21.6764	2.2971	0.0653924	0.20956	0.678692
CCDC58	0.418518	21.5358	1.63867	0.157006	0.332864	0.477733
DHX30	0.409619	21.4925	1.0967	0.318559	0.480857	0.317984
SLC30A9	0.38957	19.5003	1.92899	0.10651	0.272742	0.564247
GPD2	0.382396	20.7931	2.69408	0.0392028	0.184928	0.732998
NDUFA8	0.380109	19.2969	2.28914	0.0660788	0.210571	0.676601
NDUFA13	0.368588	22.6904	2.2605	0.0686108	0.216713	0.664114
PCM1	0.367002	17.823	0.318519	0.761864	0.846909	0.0721633
HTRA2	0.363225	21.4576	2.06726	0.0885865	0.247146	0.607046
ACADVL	0.359031	19.3071	1.14	0.301597	0.463137	0.334291
COX5A	0.353836	20.7436	1.4304	0.206997	0.385494	0.413983
CANX	0.346803	17.4766	0.586822	0.580645	0.704461	0.152143
ATAD3A	0.34044	25.2324	1.47062	0.196293	0.376249	0.424525
ABCB8	0.339169	19.3292	1.5735	0.171249	0.346852	0.459856
LRPPRC	0.335433	21.9211	1.94906	0.103694	0.266971	0.573536
AFG3L2	0.33276	23.8582	1.45238	0.20108	0.380408	0.41975
SYNCRIP	0.327691	19.1383	1.18615	0.284375	0.450104	0.346687
NDUFS3	0.323741	20.949	1.60652	0.163882	0.338627	0.470278
SLC25A11	0.32335	18.3004	1.00798	0.355829	0.511283	0.291338
NDUFA4	0.322816	18.6543	0.86086	0.42533	0.577579	0.238389
PDCD6IP	0.31835	18.0559	1.2137	0.274511	0.442303	0.35428
RPS4X	0.311669	20.3162	1.78051	0.129897	0.298514	0.525035
LETM1	0.306812	20.3118	1.20902	0.276163	0.442973	0.353623
NDUFS7	0.301607	21.2054	2.24849	0.0697033	0.218241	0.661063
SFXN1	0.29821	20.6074	1.64337	0.156025	0.331958	0.478917
PRRC2A	0.287068	18.5505	1.21154	0.275272	0.442534	0.354053
BMP2K	0.286125	18.9495	1.07324	0.328083	0.489056	0.310642
HSD17B8	0.283645	19.5474	1.66153	0.152289	0.327666	0.484568
PABPC4	0.281721	18.2239	0.614638	0.563394	0.691701	0.160082
NDUFS1	0.276968	21.7369	2.02437	0.0937878	0.254719	0.593938
EHD1	0.276779	18.0508	1.40434	0.214222	0.390832	0.40801
COX5B	0.271784	19.8369	1.24453	0.263828	0.434862	0.361649
ZNRD2	0.256138	19.6439	0.616407	0.562307	0.691551	0.160176
TUFM	0.25572	23.7527	1.38099	0.220893	0.398943	0.39909
PHB2	0.254251	28.1329	1.17263	0.289329	0.453936	0.343005
NDUFA5	0.253861	19.2318	0.943965	0.384876	0.540154	0.267482
RAB5C	0.245431	17.2886	1.23034	0.268699	0.436882	0.359636
PHB	0.242589	28.0383	1.30223	0.244827	0.415973	0.380935
VARS1	0.241411	18.2081	1.51437	0.185245	0.362177	0.441079
TIMM13	0.240293	21.626	0.778444	0.468537	0.615276	0.21093
VCP	0.212519	18.879	0.742956	0.488085	0.629419	0.20106
HSD17B4	0.212342	19.7914	0.339662	0.746733	0.836574	0.0774957
RPS29	0.212124	19.1632	1.0587	0.334104	0.493923	0.306341
FLNC	0.207289	18.7004	0.759295	0.479014	0.624838	0.204232
SPG7	0.204593	21.8116	0.916899	0.397708	0.551561	0.258407
PSMD5	0.202803	18.7684	0.944185	0.384773	0.540154	0.267482
GTF3C3	0.198945	16.8781	0.422234	0.688895	0.792354	0.101081
RPL9P8	0.197785	23.4786	1.39865	0.21583	0.392766	0.405866
HUWE1	0.184523	17.8602	0.943777	0.384964	0.540154	0.267482
COX7A2	0.173967	18.7099	0.532244	0.615404	0.730538	0.136357
MSN	0.17246	19.0764	0.705072	0.509571	0.648957	0.187784
SNAP29	0.167601	19.7527	0.958435	0.37815	0.534781	0.271824
NDUFA7	0.166377	21.4585	0.871654	0.419899	0.574556	0.240668
NDUFA12	0.164353	21.8036	0.979952	0.368323	0.525082	0.279773
MACF1	0.163748	17.862	0.549535	0.604264	0.720894	0.142129
PRDX5	0.159813	19.7496	0.676736	0.526056	0.659409	0.180845
TFB1M	0.156688	19.2986	0.690982	0.517725	0.656738	0.182608
BOLA2B	0.156247	18.1317	0.799347	0.457288	0.603914	0.219025
RPL15	0.152815	20.0047	0.571863	0.590053	0.712236	0.147376
MCCC1	0.144834	18.4925	0.384388	0.715144	0.810223	0.0913956
NDUFA9	0.140735	19.6657	0.864614	0.423435	0.576828	0.238954
EEF2	0.118342	21.7527	0.468681	0.657335	0.768857	0.114155
RPS3A	0.112594	23.4929	0.451512	0.668914	0.779856	0.107986
NFS1	0.105964	17.1329	0.230979	0.825701	0.897011	0.047202
SCAMP3	0.0981864	19.6775	0.535418	0.613351	0.729308	0.137089
RPL24	0.0917993	23.2603	0.594196	0.57604	0.701224	0.154143
RPL10	0.0892927	20.638	0.60718	0.567988	0.694139	0.158554
RPL12	0.0851364	21.5779	0.384163	0.715301	0.810223	0.0913956
RPL27A	0.0848883	24.1446	0.46093	0.662549	0.773694	0.111431
HAX1	0.0838986	21.7888	0.423747	0.687856	0.792354	0.101081
PLIN3	0.0791104	18.8916	0.577228	0.586669	0.710543	0.14841
NECAP2	0.0781072	18.9821	0.220869	0.833182	0.902325	0.0446371
RPL23	0.0766484	21.5742	0.471547	0.655412	0.767861	0.114718
RPL14	0.0756866	22.2473	0.437543	0.678411	0.788364	0.103273
PABPC1	0.0748082	17.6222	0.158225	0.879941	0.935968	0.028739
RPL6	0.0722393	24.8431	0.403126	0.70209	0.802869	0.0953554
NDUFB4	0.0675019	22.7126	0.34888	0.740174	0.832939	0.079387
RANBP1	0.063312	21.3679	0.396049	0.707008	0.807204	0.0930165
SLC25A12	0.062762	19.7177	0.189354	0.856624	0.918086	0.0371168
CTPS1	0.0524487	19.1087	0.134785	0.897589	0.943653	0.0251879
RPL11	0.0520867	22.9083	0.344159	0.74353	0.834289	0.0786832
DDX3X	0.0511028	19.7162	0.127529	0.903066	0.945253	0.0244519
ATP6V1B2	0.0509124	18.4684	0.264404	0.801117	0.875611	0.0576887
RPSA	0.0487877	20.847	0.24862	0.812697	0.885568	0.0527782
RPL37A	0.0472305	15.7944	0.0833445	0.936534	0.970202	0.0131381
RPL23A	0.0466326	21.7061	0.311789	0.766705	0.849524	0.0708241
RPL35A	0.0437014	24.0762	0.129655	0.901461	0.944952	0.0245902
ZC3HAV1	0.0364133	20.8439	0.142508	0.891767	0.940033	0.0268568
FLOT2	0.0356071	23.521	0.0764318	0.941786	0.970202	0.0131381
RBM3	0.0354151	19.3807	0.0971621	0.926049	0.965083	0.0154355
PGAM5	0.0346064	20.6102	0.144969	0.889912	0.939716	0.0270034
RPS19	0.0297338	19.4908	0.166734	0.873553	0.932049	0.0305611
RPL7	0.0257919	23.4538	0.168763	0.872031	0.931812	0.0306716
RPL21	0.0244908	23.5304	0.14109	0.892835	0.940033	0.0268568
RPS6	0.023703	22.9627	0.146465	0.888786	0.939716	0.0270034
EEF1B2	0.0159364	19.6137	0.0421909	0.967839	0.983667	0.00715207
NDUFB6	0.0158426	20.7089	0.038146	0.970921	0.984654	0.00671639
RPS14	0.0157528	22.9762	0.113342	0.913791	0.953695	0.0205906
RPS15A	0.0147968	23.6504	0.0846654	0.935531	0.970202	0.0131381
EIF4G2	0.00972412	18.2449	0.0235038	0.98208	0.992053	0.00346496
SEPTIN7	0.00952312	19.0127	0.0480616	0.963368	0.982553	0.0076438
PSMA1	0.00653488	18.5217	0.0196925	0.984985	0.993297	0.0029208
TFIP11	0.00489034	18.0193	0.00367237	0.9972	0.998632	0.000594329
RPL32	0.00261242	21.3606	0.0138937	0.989406	0.996354	0.00158627
NPEPPS	-0.00073698	17.027	-0.000824457	0.999371	0.999371	0.000273115
AIFM1	-0.000946797	22.9451	-0.00448739	0.996578	0.998632	0.000594329
SRM	-0.00199919	21.1199	-0.00713092	0.994563	0.998632	0.000594329
KRT10	-0.0030971	21.8503	-0.00362	0.99724	0.998632	0.000594329
PRDX6	-0.00458473	20.9539	-0.0231254	0.982368	0.992053	0.00346496
RPL4	-0.00688459	24.2395	-0.04377	0.966637	0.983667	0.00715207
RPS9	-0.00750554	22.2575	-0.0412247	0.968575	0.983667	0.00715207
TCP1	-0.009836	20.3714	-0.0667878	0.949117	0.973558	0.0116382
RPS21	-0.0104173	18.9007	-0.0494971	0.962275	0.982553	0.0076438
NDUFV2	-0.0117563	20.2614	-0.0642483	0.951049	0.974146	0.0113762
PARK7	-0.0117833	20.6356	-0.0689235	0.947493	0.973558	0.0116382
RPS8	-0.0117882	23.8777	-0.0853335	0.935024	0.970202	0.0131381
SCO1	-0.0126387	23.0837	-0.0556355	0.957602	0.979459	0.00901374
TOMM22	-0.0160508	20.0639	-0.0765363	0.941706	0.970202	0.0131381
PTGES2	-0.0162223	18.8274	-0.0683483	0.94793	0.973558	0.0116382
ACAA1	-0.0183158	19.7897	-0.0252305	0.980763	0.992053	0.00346496
JPT2	-0.019132	18.6788	-0.0768563	0.941463	0.970202	0.0131381
RPL38	-0.0196683	22.1137	-0.132585	0.899249	0.944014	0.0250218
PSMC5	-0.0213761	18.5826	-0.078275	0.940385	0.970202	0.0131381
PA2G4	-0.0260429	20.163	-0.164629	0.875132	0.932347	0.0304226
PSMA6	-0.0306379	18.6521	-0.084546	0.935622	0.970202	0.0131381
ATP6V1A	-0.0339882	18.9006	-0.169193	0.871708	0.931812	0.0306716
PFKM	-0.0367053	18.2699	-0.191164	0.855273	0.91801	0.0371525
RPS24	-0.0390014	21.7971	-0.232327	0.824705	0.897011	0.047202
LRRC47	-0.041083	19.2453	-0.145404	0.889585	0.939716	0.0270034
ALDOA	-0.0425987	20.4313	-0.201862	0.847298	0.913553	0.0392661
TMEM109	-0.0427573	19.8047	-0.219269	0.834367	0.902325	0.0446371
RPS16	-0.0465553	23.2592	-0.354437	0.736232	0.829997	0.0809233
SND1	-0.0512788	21.1151	-0.282638	0.787811	0.866603	0.06218
TLN1	-0.0513742	20.0758	-0.256949	0.80658	0.88024	0.0553989
ESYT1	-0.0514667	19.1822	-0.156627	0.881141	0.935968	0.028739
MIF	-0.0540251	22.3182	-0.282323	0.78804	0.866603	0.06218
SFXN2	-0.0550083	18.8379	-0.31031	0.767771	0.849524	0.0708241
DDOST	-0.0613651	21.2741	-0.271218	0.796135	0.871495	0.0597352
CYRIB	-0.0620412	18.7322	-0.288716	0.783393	0.864143	0.0634146
TUBA1C	-0.0622468	19.9621	-0.412493	0.695607	0.798001	0.0979968
LASP1	-0.0637019	20.0859	-0.220937	0.833132	0.902325	0.0446371
SRSF10	-0.0648691	18.1626	-0.196001	0.851665	0.916883	0.0376862
CCT3	-0.0649438	21.3426	-0.428698	0.684459	0.791798	0.101386
SEC22B	-0.065242	18.2761	-0.307223	0.769997	0.850675	0.0702364
GART	-0.0663544	20.8074	-0.347486	0.741164	0.832939	0.079387
LARP1	-0.0691328	19.8041	-0.427433	0.685326	0.791798	0.101386
PHGDH	-0.0708799	21.1423	-0.276668	0.792159	0.868468	0.061246
SLC25A13	-0.0708987	21.7345	-0.311919	0.766612	0.849524	0.0708241
RPL3	-0.0714763	20.9446	-0.392102	0.709756	0.80777	0.0927122
RPS20	-0.0716433	18.3993	-0.33293	0.751537	0.839152	0.0761595
STMN1	-0.0738349	21.0185	-0.359267	0.732813	0.827445	0.0822611
RPS7	-0.0743446	23.0865	-0.516454	0.625679	0.738446	0.131681
RPL13	-0.0751743	23.5297	-0.515678	0.626186	0.738446	0.131681
FLOT1	-0.0762745	22.33	-0.193578	0.853472	0.91745	0.0374176
PRKCSH	-0.0784721	18.631	-0.394341	0.708196	0.807276	0.0929779
SLC25A10	-0.0879504	18.0416	-0.327802	0.755205	0.840811	0.0753017
ENO1	-0.0890412	21.639	-0.658663	0.536753	0.666987	0.175883
MDH1	-0.0958483	19.6289	-0.433173	0.681396	0.790552	0.10207
RPL5	-0.0976035	21.5707	-0.426766	0.685783	0.791798	0.101386
PGD	-0.0977196	18.2527	-0.445455	0.673024	0.783373	0.106031
GAPDH	-0.112318	21.2941	-0.663165	0.534075	0.664812	0.177301
DDX50	-0.112809	16.9998	-0.1257	0.904447	0.945319	0.0244218
SCP2	-0.116956	19.8918	-0.217141	0.835945	0.90267	0.0444711
CCT8	-0.119627	21.4305	-0.567594	0.592755	0.71306	0.146874
DARS1	-0.121377	18.9547	-0.853487	0.42907	0.581556	0.235409
CLTC	-0.12941	21.5329	-0.607632	0.567708	0.694139	0.158554
RPS3	-0.131185	23.616	-0.919568	0.396428	0.550851	0.258966
ELF1	-0.132848	17.7858	-0.33152	0.752545	0.839152	0.0761595
MVD	-0.133003	18.726	-0.718541	0.501859	0.643709	0.191311
ABCF2	-0.133075	18.102	-0.28016	0.789615	0.867004	0.0619788
EIF3A	-0.14117	19.7503	-0.361862	0.73098	0.826676	0.0826649
HSP90AA1	-0.147947	22.0831	-0.863548	0.423973	0.576828	0.238954
MLEC	-0.148605	23.1782	-0.337592	0.748208	0.836919	0.0773166
MAP4	-0.151613	17.8969	-0.754403	0.481718	0.625236	0.203956
RPN2	-0.152599	18.1705	-0.632165	0.552689	0.683238	0.165428
TTLL12	-0.159023	18.7269	-0.58679	0.580665	0.704461	0.152143
COPG1	-0.164075	17.9534	-0.7448	0.487055	0.629222	0.201196
PFN1	-0.165084	20.0186	-0.639172	0.548446	0.679164	0.168025
RPL19	-0.165421	25.4011	-0.62816	0.555124	0.68389	0.165014
NSF	-0.166807	18.8555	-0.526875	0.618887	0.733458	0.134625
CCT4	-0.169958	20.0458	-1.03971	0.342109	0.502648	0.298736
GCN1	-0.169963	19.8861	-0.6067	0.568284	0.694139	0.158554
FKBP4	-0.170267	19.7549	-0.83451	0.43881	0.589188	0.229746
CCT7	-0.17234	19.5311	-0.797638	0.4582	0.603914	0.219025
COPB1	-0.175514	19.0835	-0.602729	0.57074	0.695954	0.15742
CDK1	-0.179934	18.9652	-0.473193	0.65431	0.767823	0.114739
TUBB	-0.18031	22.2275	-1.10573	0.314955	0.477427	0.321093
HSP90AB1	-0.182662	23.3897	-0.979863	0.368363	0.525082	0.279773
TIMM8A	-0.185575	18.2495	-0.495779	0.639275	0.752644	0.12341
PKM	-0.19059	22.4313	-1.21928	0.27255	0.441125	0.355438
SRSF2	-0.191495	18.9978	-0.556023	0.600114	0.717136	0.144398
RPL7A	-0.192179	22.1966	-1.28954	0.248899	0.420336	0.376404
KARS1	-0.193157	19.7922	-0.823755	0.444402	0.59447	0.22587
RPL36	-0.196741	23.4481	-1.08688	0.322518	0.482767	0.316263
FASN	-0.197565	21.9021	-0.564397	0.594783	0.713127	0.146833
MCM2	-0.199527	20.7201	-1.25018	0.261911	0.432696	0.363818
EEF1D	-0.201891	20.977	-0.981761	0.367506	0.525082	0.279773
PSMC3	-0.205648	21.5476	-1.17363	0.288961	0.453936	0.343005
PPP1R7	-0.20854	19.5677	-1.14025	0.301501	0.463137	0.334291
EIF4A2	-0.210744	18.6457	-0.679611	0.524368	0.659409	0.180845
ACTL6A	-0.214216	17.9552	-0.152667	0.884119	0.937741	0.027917
SNRNP27	-0.217503	24.1273	-1.32398	0.237993	0.415383	0.381551
ADAR	-0.219828	18.6327	-0.735629	0.492191	0.633574	0.198203
MTHFD1	-0.220512	19.2236	-1.17014	0.290251	0.454389	0.342572
SLC12A2	-0.221567	18.1427	-1.43107	0.206814	0.385494	0.413983
CCT6A	-0.222437	22.3556	-1.33667	0.234084	0.412954	0.384098
ERP29	-0.222633	20.1259	-0.749764	0.48429	0.62678	0.202885
CLNS1A	-0.223488	18.7522	-0.91141	0.400351	0.554154	0.25637
RPS23	-0.224677	21.0056	-0.754483	0.481673	0.625236	0.203956
AHCY	-0.224737	20.1646	-1.2594	0.25881	0.429553	0.366983
GANAB	-0.225854	22.0522	-1.07671	0.326658	0.487946	0.311629
PSMD2	-0.226391	18.2108	-0.876236	0.417609	0.572516	0.242212
ACLY	-0.229425	20.9262	-1.61713	0.161582	0.337642	0.471544
CCT5	-0.232203	20.7879	-1.37304	0.223208	0.40211	0.395655
KPNB1	-0.23479	20.9886	-1.4141	0.211487	0.388824	0.410247
RPN1	-0.235163	21.6565	-1.13455	0.303689	0.465267	0.332298
HSP90B1	-0.236225	21.8445	-1.35839	0.227532	0.406834	0.390583
MCM5	-0.237045	20.9954	-1.69581	0.145474	0.32073	0.49386
FLNB	-0.239162	19.3599	-0.775406	0.470188	0.615933	0.210466
HSPA8	-0.240373	23.5439	-1.04601	0.339437	0.499746	0.301251
TRMT1	-0.24228	18.5912	-0.630515	0.553691	0.683299	0.165389
EIF4G1	-0.24882	20.0087	-0.774364	0.470755	0.615933	0.210466
SEPTIN2	-0.249025	16.5276	-0.562852	0.595765	0.713127	0.146833
LARS1	-0.249892	20.1144	-1.55035	0.176604	0.351314	0.454304
RPL18	-0.253482	25.1317	-1.39185	0.217765	0.395285	0.403089
RUVBL1	-0.255816	19.943	-1.66416	0.151755	0.327666	0.484568
RUVBL2	-0.262438	20.8061	-1.83807	0.120273	0.289602	0.538198
PDIA6	-0.263947	23.1154	-1.11107	0.312842	0.475237	0.32309
PAFAH1B3	-0.266077	19.4944	-1.88395	0.113116	0.280658	0.551822
RPA3	-0.269852	17.2049	-0.698777	0.513203	0.652424	0.18547
NONO	-0.270812	20.4307	-1.11106	0.312848	0.475237	0.32309
IPO4	-0.270843	18.046	-0.81311	0.449989	0.598594	0.222868
TKT	-0.272548	19.4738	-0.712087	0.505545	0.646124	0.189684
TPD52	-0.277723	20.2511	-1.36436	0.225758	0.405685	0.391811
PRDX1	-0.279469	20.6356	-1.3293	0.236345	0.415341	0.381595
PCNA	-0.284366	19.4706	-0.539894	0.610461	0.727077	0.138419
DDX1	-0.287168	19.3411	-1.40666	0.213569	0.390636	0.408228
LUC7L2	-0.295532	26.1262	-1.77079	0.131598	0.301456	0.520777
HSPA5	-0.295621	22.4388	-1.47063	0.196291	0.376249	0.424525
SLC2A1	-0.295785	18.5255	-0.644349	0.545325	0.676467	0.169754
GLUL	-0.296552	18.8596	-2.18881	0.075408	0.2291	0.639975
PPIA	-0.301129	22.4553	-1.45528	0.200313	0.37996	0.420262
POLR1C	-0.309325	20.4759	-2.06166	0.0892479	0.248026	0.605502
TBCA	-0.310977	19.7908	-2.15049	0.0793272	0.232513	0.633553
MAT2A	-0.311621	19.3343	-1.05093	0.337361	0.497711	0.303023
NOP58	-0.318545	19.7186	-1.55885	0.174619	0.351314	0.454304
SMN2	-0.323824	20.826	-1.94769	0.103884	0.266971	0.573536
CCT2	-0.324548	20.9315	-1.55164	0.176302	0.351314	0.454304
HP1BP3	-0.331959	18.7898	-0.88683	0.412353	0.56748	0.24605
DYNC1H1	-0.332661	19.3667	-1.72725	0.139488	0.314668	0.502147
ILF3	-0.335344	20.3829	-1.70351	0.143984	0.319618	0.495368
SRSF3	-0.337306	22.4226	-2.39982	0.0571841	0.202991	0.692524
HSPA1A	-0.342595	22.3635	-1.57875	0.170057	0.346852	0.459856
COPA	-0.345304	20.2337	-2.19963	0.0743391	0.227783	0.64248
NCL	-0.34537	21.5119	-1.05941	0.333807	0.493923	0.306341
C11orf98	-0.346263	18.9227	-1.95056	0.103486	0.266971	0.573536
PCBP1	-0.352977	17.9696	-1.2952	0.247075	0.4188	0.377993
UBA1	-0.357033	17.8295	-1.13035	0.305308	0.46675	0.330916
MCM3	-0.358413	20.6897	-2.34112	0.0617319	0.206821	0.684405
P4HB	-0.360525	18.3926	-1.28208	0.251318	0.420963	0.375756
XRCC6	-0.364338	21.4631	-1.6786	0.148856	0.325583	0.487338
EBAG9	-0.366094	18.1621	-1.14359	0.300226	0.463137	0.334291
RPLP1	-0.367273	19.8692	-1.09252	0.320241	0.481368	0.317523
TNPO1	-0.368089	19.5577	-2.43461	0.0546582	0.202712	0.69312
CAPZA1	-0.370669	19.3294	-1.54708	0.177372	0.351314	0.454304
PRDX2	-0.371643	20.3096	-2.03695	0.0922301	0.253387	0.596216
OCIAD1	-0.375278	26.9442	-2.41742	0.0558909	0.202712	0.69312
ZPR1	-0.377809	17.2338	-0.388025	0.712601	0.809723	0.0916635
PPM1F	-0.378268	20.2708	-2.00193	0.0966336	0.258531	0.587488
MGST1	-0.38034	17.3311	-0.40509	0.700729	0.802592	0.0955052
SRSF4	-0.382365	22.6318	-2.33844	0.0619478	0.206821	0.684405
MCM6	-0.382932	21.0492	-2.26901	0.0678481	0.215252	0.667052
PRPF38A	-0.385609	20.9202	-1.78707	0.128763	0.297817	0.526051
KIF2A	-0.389484	18.1817	-1.30838	0.242876	0.415614	0.381309
EPRS1	-0.392247	20.457	-2.88809	0.0307562	0.167062	0.777122
EEF1G	-0.392521	21.3108	-1.31979	0.239296	0.415383	0.381551
RTCB	-0.392594	20.4282	-1.76065	0.133395	0.304599	0.516272
VIM	-0.395398	20.4368	-0.88281	0.414341	0.569124	0.244793
SNRPE	-0.399115	21.0305	-1.60814	0.16353	0.338627	0.470278
FARSB	-0.402306	18.9279	-2.64867	0.0415249	0.184928	0.732998
GAPVD1	-0.403643	17.9267	-0.940989	0.38627	0.540929	0.266859
PSMC6	-0.409009	18.3204	-1.7986	0.126792	0.296053	0.528631
SF3A3	-0.409614	18.6563	-0.566073	0.593719	0.71306	0.146874
COLGALT1	-0.411562	18.025	-1.49336	0.190473	0.367122	0.435189
HNRNPU	-0.416059	23.1755	-2.65775	0.0410486	0.184928	0.732998
CAD	-0.420651	20.6174	-2.42196	0.0555625	0.202712	0.69312
prpL	-0.424056	25.897	-2.0956	0.0853135	0.240889	0.618182
PDIA3	-0.432272	20.5026	-1.97824	0.0997347	0.263874	0.578604
PAICS	-0.43377	18.9826	-1.63689	0.157379	0.332864	0.477733
RO60	-0.434224	18.6666	-2.41732	0.055898	0.202712	0.69312
STIP1	-0.435748	21.3795	-2.36153	0.0601082	0.206094	0.685935
NSUN2	-0.448207	18.3581	-1.83934	0.120069	0.289602	0.538198
SNRPA	-0.449322	21.9791	-2.14866	0.0795196	0.232513	0.633553
CEPT1	-0.453598	19.6212	-1.31402	0.2411	0.415383	0.381551
PSMC1	-0.458274	18.6323	-1.13985	0.301652	0.463137	0.334291
POLDIP3	-0.461769	19.6444	-1.14583	0.299371	0.463137	0.334291
SERPINH1	-0.46229	21.1026	-1.57716	0.170417	0.346852	0.459856
MCM4	-0.462394	20.2486	-2.94508	0.0286699	0.166357	0.778958
MCM7	-0.463913	21.517	-3.16089	0.0220703	0.146522	0.834096
HNRNPM	-0.465477	23.0838	-1.88264	0.113315	0.280658	0.551822
GMPS	-0.46634	20.3568	-3.08401	0.0242065	0.153593	0.813628
XRCC5	-0.467533	20.3117	-2.65218	0.0413401	0.184928	0.732998
PPIG	-0.468903	19.9917	-1.35125	0.229667	0.409631	0.387608
DHX9	-0.473739	20.6269	-2.69026	0.0393925	0.184928	0.732998
SAP30BP	-0.477994	20.8951	-2.36985	0.0594599	0.206094	0.685935
TRIM28	-0.484122	21.9801	-2.76578	0.0358181	0.180004	0.744718
RABL6	-0.485892	22.324	-1.56763	0.172592	0.348587	0.457689
POLR2E	-0.488241	18.6019	-1.261	0.258274	0.429553	0.366983
PARP2	-0.49066	18.7964	-2.47685	0.05175	0.199488	0.700084
IARS1	-0.491325	19.0051	-3.37912	0.0170641	0.127447	0.89467
LUC7L3	-0.492479	22.0388	-1.43304	0.206278	0.385494	0.413983
HNRNPUL2	-0.493623	20.2479	-1.88431	0.113061	0.280658	0.551822
NOP56	-0.501651	19.5907	-2.4276	0.0551572	0.202712	0.69312
CHRAC1	-0.513437	18.4632	-2.16395	0.0779267	0.232319	0.633914
HNRNPL	-0.5152	18.8664	-1.31159	0.241862	0.415383	0.381551
FUBP1	-0.517389	22.0917	-3.05997	0.0249204	0.154359	0.811469
TUBB6	-0.5198	18.7539	-0.848297	0.431717	0.583043	0.234299
PARP1	-0.525296	21.3233	-1.94801	0.103839	0.266971	0.573536
NCLN	-0.528697	18.9481	-3.12803	0.0229566	0.149444	0.825523
SCFD1	-0.52967	16.997	-0.932807	0.390126	0.545263	0.263394
DDX46	-0.536074	25.6825	-1.81719	0.123679	0.292106	0.53446
SSRP1	-0.543406	18.4716	-1.34193	0.232482	0.411579	0.385547
NPM1	-0.546935	22.5149	-2.82837	0.0331227	0.17335	0.761076
SNX1	-0.548509	16.9783	-0.572935	0.589376	0.712236	0.147376
SRSF5	-0.54968	18.8249	-2.03653	0.0922824	0.253387	0.596216
CKB	-0.555035	20.3283	-2.65536	0.0411736	0.184928	0.732998
MAPK1	-0.564923	17.6151	-1.28149	0.251511	0.420963	0.375756
THRAP3	-0.565422	20.1226	-2.93992	0.0288522	0.166357	0.778958
PRKDC	-0.567448	20.0627	-2.15893	0.0784462	0.232421	0.633724
SAFB	-0.574184	19.5702	-1.96095	0.102062	0.266918	0.573622
RSL1D1	-0.581324	19.2317	-2.93436	0.0290502	0.166357	0.778958
FUS	-0.582029	19.0947	-1.27247	0.254469	0.424313	0.372314
HNRNPK	-0.586278	21.0144	-3.71107	0.011704	0.114956	0.93947
DIS3	-0.586922	19.6187	-1.23062	0.268602	0.436882	0.359636
UBR5	-0.594856	18.4328	-1.51381	0.185382	0.362177	0.441079
MSH6	-0.595998	19.8619	-3.61541	0.0130242	0.117018	0.931746
COPE	-0.598314	18.9801	-2.01427	0.0950579	0.256264	0.591313
SF3B3	-0.603302	22.3495	-1.21469	0.274161	0.442303	0.35428
RCC2	-0.613491	20.151	-1.65982	0.152637	0.327666	0.484568
KHSRP	-0.616205	22.3699	-3.65182	0.0125029	0.117018	0.931746
MSH2	-0.619312	18.3682	-2.96144	0.0280999	0.166357	0.778958
RPRD1A	-0.621356	18.782	-3.46809	0.0153977	0.124047	0.906415
ARL6IP4	-0.628401	19.4345	-1.54891	0.176942	0.351314	0.454304
DDX39B	-0.632963	18.8206	-2.4802	0.0515272	0.199488	0.700084
RBM39	-0.640797	22.2756	-1.70491	0.143715	0.319618	0.495368
RARS1	-0.646877	19.5617	-3.99706	0.00857464	0.102467	0.989416
SON	-0.655145	20.013	-1.88774	0.112544	0.280658	0.551822
RBM27	-0.655175	18.9432	-3.51132	0.0146545	0.123451	0.908507
H4C8	-0.656593	19.5306	-1.28694	0.249739	0.420336	0.376404
NOP10	-0.660182	19.653	-2.44041	0.0542489	0.202712	0.69312
PTBP1	-0.664574	18.1232	-1.2535	0.260791	0.431841	0.364676
TRA2B	-0.667693	19.1144	-2.08705	0.0862871	0.241671	0.616775
SF3B2	-0.670378	22.6266	-3.18575	0.0214248	0.143566	0.842948
SRSF11	-0.684835	24.2884	-3.14365	0.0225305	0.148205	0.829137
XRN2	-0.699533	18.6833	-1.88379	0.113141	0.280658	0.551822
PABPN1	-0.703369	18.4074	-1.18236	0.285757	0.451295	0.34554
PUF60	-0.708819	25.4139	-1.89624	0.111273	0.280658	0.551822
MMTAG2	-0.713809	19.8108	-3.83137	0.0102526	0.114227	0.942233
TFRC	-0.722349	22.5579	-3.08884	0.0240658	0.153593	0.813628
NCBP1	-0.727111	19.1129	-1.55602	0.175278	0.351314	0.454304
PSME3	-0.728364	17.8788	-1.8375	0.120365	0.289602	0.538198
RARS2	-0.743564	16.5621	-1.34652	0.231092	0.411149	0.386001
MTA2	-0.743969	18.2141	-2.15554	0.078799	0.232506	0.633566
KIF4A	-0.748723	18.4084	-3.67212	0.0122225	0.116847	0.932381
CHD1L	-0.76492	20.897	-3.7187	0.0116054	0.114956	0.93947
DDX17	-0.768905	20.3001	-2.85581	0.0320116	0.169457	0.77094
EFTUD2	-0.782106	19.9292	-3.46977	0.0153681	0.124047	0.906415
SF3A1	-0.782752	19.9517	-2.6988	0.0389693	0.184928	0.732998
NUMA1	-0.782974	18.6689	-2.39976	0.0571884	0.202991	0.692524
SF1	-0.790406	20.1227	-3.50224	0.0148072	0.123451	0.908507
RSRC1	-0.795479	17.2722	-1.49544	0.18995	0.367101	0.435215
FARSA	-0.802563	18.6541	-4.09609	0.00772131	0.0954514	1.02022
SF3B1	-0.805196	20.867	-3.063	0.0248292	0.154359	0.811469
SMC2	-0.808399	18.6663	-2.17043	0.0772622	0.232319	0.633914
SNRPD3	-0.827915	19.9801	-2.29766	0.0653445	0.20956	0.678692
HNRNPD	-0.859979	18.3791	-2.56331	0.0463025	0.191994	0.716712
TXNL1	-0.865438	17.4971	-0.928085	0.392365	0.546263	0.262598
SRRM2	-0.888129	26.1655	-2.76457	0.0358725	0.180004	0.744718
DDX42	-0.890578	19.6636	-3.47684	0.015244	0.124047	0.906415
MFAP1	-0.897138	16.9504	-1.58515	0.168616	0.346411	0.460408
RBM7	-0.899612	18.2188	-0.95863	0.37806	0.534781	0.271824
RBM4	-0.905631	17.6122	-2.56539	0.046179	0.191994	0.716712
AHNAK	-0.922507	20.3569	-2.29621	0.0654692	0.20956	0.678692
HNRNPC	-0.937564	21.8501	-6.28581	0.00106174	0.036251	1.44068
RBBP6	-0.948991	22.5313	-2.68661	0.0395746	0.184928	0.732998
DDX28	-0.960947	18.1471	-0.705643	0.509243	0.648957	0.187784
CPSF6	-0.98856	19.7887	-2.50963	0.0496077	0.199127	0.700871
TCOF1	-1.00588	21.4709	-2.75879	0.0361334	0.180004	0.744718
GPATCH1	-1.00685	19.6317	-2.08968	0.0859869	0.241671	0.616775
GTF3C5	-1.01405	18.3861	-3.79303	0.0106918	0.114227	0.942233
ACIN1	-1.02362	17.9873	-1.44117	0.204079	0.384054	0.415608
RBBP4	-1.02956	18.3426	-4.10347	0.00766164	0.0954514	1.02022
COA7	-1.03056	18.1305	-0.901315	0.405247	0.559692	0.252051
SRRT	-1.04097	21.7039	-2.34167	0.0616868	0.206821	0.684405
EXOSC9	-1.05276	17.4687	-1.23634	0.26663	0.43647	0.360045
HNRNPA2B1	-1.10024	17.8935	-1.02476	0.348518	0.504653	0.297007
TOP1MT	-1.13476	17.9651	-1.66824	0.15093	0.327666	0.484568
WDR77	-1.13971	18.0356	-1.06709	0.330618	0.491811	0.308202
SREK1	-1.1498	20.2629	-2.36688	0.0596905	0.206094	0.685935
SNRNP200	-1.17484	18.3372	-2.31984	0.0634734	0.207658	0.682651
KRT1	-1.19251	21.7466	-2.35863	0.060336	0.206094	0.685935
YARS1	-1.19831	17.4139	-2.49655	0.0504509	0.199488	0.700084
KRT5	-1.21518	18.5851	-1.65061	0.154524	0.329744	0.481823
PDCD5	-1.26564	17.5943	-1.18697	0.284078	0.450104	0.346687
CHCHD1	-1.27965	18.0822	-2.31692	0.0637165	0.207658	0.682651
ETF1	-1.30964	18.0991	-1.02982	0.346339	0.504653	0.297007
USP5	-1.33683	16.279	-2.13014	0.0814936	0.235608	0.627809
PPP2R1A	-1.33939	17.7301	-1.80308	0.126036	0.295319	0.529709
MYH10	-1.34065	17.3996	-1.32686	0.2371	0.415383	0.381551
MTREX	-1.36543	18.3729	-2.48956	0.0509084	0.199488	0.700084
PRPF8	-1.39796	19.6535	-2.58458	0.0450588	0.191167	0.718588
GDI2	-1.4071	17.6827	-1.30585	0.243677	0.41564	0.381282
SSB	-1.41464	16.2628	-1.89998	0.110719	0.280658	0.551822
SART1	-1.53181	17.6971	-1.72686	0.13956	0.314668	0.502147
DDX21	-1.5549	17.9684	-1.31064	0.242162	0.415383	0.381551
SPATA5L1	-1.58538	16.8282	-2.21407	0.0729359	0.22541	0.647027
MCL1	-1.61268	18.2215	-1.18762	0.28384	0.450104	0.346687
FEN1	-1.65504	16.9632	-2.00491	0.0962504	0.25847	0.587589
PRPF40A	-1.68115	18.182	-2.59672	0.0443654	0.190479	0.720153
VASP	-1.71812	16.9884	-1.38968	0.218386	0.39541	0.402952
LMNB1	-1.72413	16.5298	-2.85252	0.0321425	0.169457	0.77094
TAF1	-1.73019	18.1032	-1.78789	0.128622	0.297817	0.526051
ZCCHC8	-1.75397	18.305	-1.58171	0.16939	0.346852	0.459856
FKBP1A	-1.76579	19.0189	-1.31593	0.2405	0.415383	0.381551
SRSF7	-1.78492	18.6585	-1.42126	0.209503	0.387149	0.412121
HEATR3	-1.81614	17.194	-2.10579	0.0841673	0.240351	0.619155
CHD4	-1.81663	18.9153	-1.41149	0.212215	0.389151	0.409882
FIP1L1	-1.88264	18.1756	-1.84061	0.119864	0.289602	0.538198
KLC1	-1.8944	16.7418	-1.53361	0.180575	0.354718	0.450117
PRPF31	-1.90537	17.5487	-2.61161	0.04353	0.189158	0.723176
OSBPL11	-1.90598	18.0605	-9.3699	0.000140169	0.0111668	1.95207
SLC25A3	-1.93337	20.3671	-1.0242	0.348758	0.504653	0.297007
YJU2	-1.97598	17.736	-7.65376	0.000396995	0.0208822	1.68022
ATXN2	-2.05854	19.1607	-1.32311	0.238263	0.415383	0.381551
CARM1	-2.11795	16.7935	-2.33278	0.0624078	0.207159	0.683696
ATP2A2	-2.12084	17.9882	-2.01416	0.0950713	0.256264	0.591313
KRT9	-2.13276	19.4412	-3.60218	0.0132197	0.117018	0.931746
XRCC1	-2.1339	19.0547	-1.6686	0.150857	0.327666	0.484568
ACP1	-2.34915	16.6001	-4.81198	0.0037753	0.0629509	1.201
SNW1	-2.43364	17.2235	-2.16239	0.0780879	0.232319	0.633914
QARS1	-2.57106	16.645	-7.55413	0.000424283	0.0208822	1.68022
RFC4	-2.64222	17.3056	-2.48941	0.0509178	0.199488	0.700084
THOC1	-2.72243	18.7548	-2.59044	0.0447228	0.190871	0.719261
U2SURP	-2.92895	17.7597	-2.37122	0.0593535	0.206094	0.685935
P4HA1	-3.1486	16.5702	-7.51068	0.000436865	0.0208822	1.68022
DDX23	-3.18966	16.5907	-7.5944	0.000412998	0.0208822	1.68022
FRYL	-3.26031	20.0545	-14.9756	1.17e-05	0.00418308	2.3785
TAF15	-3.53238	16.9681	-5.89129	0.00145587	0.0431057	1.36547
DDX5	-3.56522	18.2425	-2.4042	0.0568591	0.202991	0.692524
GSTP1	-3.92519	19.1585	-2.32305	0.0632072	0.207658	0.682651
HOMER1	-5.3341	18.7877	-4.53146	0.0049542	0.0737687	1.13213
