# Supplementary material for: Genome-wide CRISPRi screening identifies OCIAD1 as a prohibitin client and regulatory determinant of mitochondrial Complex III assembly in human cells
Source: eLife journal article supplement (doi:10.7554/elife.67624), 2021-05-25
Supplement: supp2 [file HHpred_analysis.xlsx]

## Sheet: HHpred_analysis
OCIAD1 (S. cerevisiae database)
Rank	Hit	Name	Probability	E-value	Score	SS	Aligned cols	Target Length
1	NP_012188.3	hypothetical protein YIL077C [Saccharomyces cerevisiae S288c]	80.9	1.2	36.05	8.4	77	320
2	NP_010517.1	Cox20p [Saccharomyces cerevisiae S288c]	60.75	2.1	32.58	4.8	52	205
3	NP_116328.4	hypothetical protein YBR255C-A [Saccharomyces cerevisiae S288c]	50.97	17	24.19	9.3	85	120
4	NP_014415.1	Rcf2p [Saccharomyces cerevisiae S288c]	45.4	11	27.86	7	65	224
5	NP_012991.3	Pam17p [Saccharomyces cerevisiae S288c]	39.26	35	24.78	8.9	76	197
6	NP_013682.1	Rcf1p [Saccharomyces cerevisiae S288c]	23.56	35	23.61	6.1	64	159
OCIAD2 (S. cerevisiae database)
Rank	Hit	Name	Probability	E-value	Score	SS	Aligned cols	Target Length
1	NP_012188.3	hypothetical protein YIL077C [Saccharomyces cerevisiae S288c]	69.09	5.9	29.2	9.1	76	320
2	NP_065435.1	Mic10p [Saccharomyces cerevisiae S288c]	61	8.4	23.75	8	88	97
3	NP_014415.1	Rcf2p [Saccharomyces cerevisiae S288c]	56.48	9.4	26.34	7.7	65	224
4	NP_012991.3	Pam17p [Saccharomyces cerevisiae S288c]	38.62	30	23.58	10.8	93	197
5	NP_010517.1	Cox20p [Saccharomyces cerevisiae S288c]	36.43	17	25.17	6.1	55	205
6	NP_012427.1	pheromone-regulated protein PRM10 [Saccharomyces cerevisiae S288c]	34.69	29	24.68	7.7	64	383
7	NP_010124.1	hypothetical protein YDL157C [Saccharomyces cerevisiae S288c]	20.53	22	22.29	3.8	66	118
