# Supplementary material for: Genome-wide CRISPRi screening identifies OCIAD1 as a prohibitin client and regulatory determinant of mitochondrial Complex III assembly in human cells
Source: eLife. 2021 May 26;10:e67624. doi: 10.7554/eLife.67624 (PMC8154037; doi:10.7554/eLife.67624)
Supplement: Supplementary file 1. — Read counts and phenotypes for individual sgRNAs as well as gene-level phenotypes. [file elife-67624-supp1.xlsx]

## Sheet: sgRNA sequences
sgId	sublibrary	gene	transcripts	sequence
A1BG_+_58858549.23-P1	h3_top5	A1BG	P1	GGCGAGGAACCGCCCAGCAA
A1BG_+_58858791.23-P1	h3_supp5	A1BG	P1	GCCAGCACGCCGGCAACTAC
A1BG_+_58858964.23-P1	h3_top5	A1BG	P1	GCTCCGGGCGACGTGGAGTG
A1BG_+_58864367.23-P2	h3_top5	A1BG	P2	GTGCTGACGGGTGACACCCA
A1BG_+_58864705.23-P2	h3_supp5	A1BG	P2	GGGGAACAGGAGCCTTACGG
A1BG_-_58858562.23-P1	h3_supp5	A1BG	P1	GCTGCAGGGCCTTTGCTGGG
A1BG_-_58858617.23-P1	h3_top5	A1BG	P1	GGAGACCCAGCGCTAACCAG
A1BG_-_58858630.23-P1	h3_top5	A1BG	P1	GAACCAGGGGTGCCCAAGGG
A1BG_-_58858788.23-P1	h3_top5	A1BG	P1	GGGGCACCCAGGAGCGGTAG
A1BG_-_58858915.23-P1	h3_supp5	A1BG	P1	GAGCAGCTCGAAGGTGACGT
A1BG_-_58858950.23-P1	h3_supp5	A1BG	P1	GGCAGCGCAGGACGGCATCT
A1BG_-_58858991.23-P1	h3_supp5	A1BG	P1	GTCCACGTCGCCCGGAGCTG
A1BG_-_58864354.23-P2	h3_top5	A1BG	P2	GTCCTGTGGACAAGCCCGAG
A1BG_-_58864360.23-P2	h3_top5	A1BG	P2	GGGACAAGCCCGAGCGGCAG
A1BG_-_58864420.23-P2	h3_supp5	A1BG	P2	GCTTGATGGCAGGTGAGTCA
A1BG_-_58864428.23-P2	h3_supp5	A1BG	P2	GCAGGTGAGTCAAGGTGCAC
A1BG_-_58864436.23-P2	h3_supp5	A1BG	P2	GTCAAGGTGCACAGGCTCCT
A1BG_-_58864715.23-P2	h3_supp5	A1BG	P2	GTGCGGAGACAGCCCCCGTA
A1BG_-_58864822.23-P2	h3_top5	A1BG	P2	GATGATGGTCGCGCTCACTC
A1BG_-_58864840.23-P2	h3_top5	A1BG	P2	GCCGGTGCAGTGAGTGTCTG
A1CF_+_52645000.23-P1P2	h3_top5	A1CF	P1P2	GGAGTGCCTGTCCCAATCCT
A1CF_+_52645034.23-P1P2	h3_supp5	A1CF	P1P2	GTAGCTCTAACCAGACAGCA
A1CF_+_52645080.23-P1P2	h3_top5	A1CF	P1P2	GACCACGGAGGGTTCAAGAG
A1CF_+_52645091.23-P1P2	h3_supp5	A1CF	P1P2	GTCTGTAGACTTACCACGGA
A1CF_+_52645339.23-P1P2	h3_top5	A1CF	P1P2	GGGGATCTCTGAAATTACTC
A1CF_+_52645358.23-P1P2	h3_supp5	A1CF	P1P2	GAGGAAACCTTTTCCGGGTG
A1CF_+_52645377.23-P1P2	h3_supp5	A1CF	P1P2	GGTTGAATTCGCCATAATCA
A1CF_-_52645011.23-P1P2	h3_top5	A1CF	P1P2	GTTCTCAGGGTCCTAGGATT
A1CF_-_52645249.23-P1P2	h3_supp5	A1CF	P1P2	GTAGGCTCGATAACAGAAGA
A1CF_-_52645373.23-P1P2	h3_top5	A1CF	P1P2	GAGAGATCCCCACCCGGAAA
A2ML1_+_8975211.23-P1P2	h7_top5	A2ML1	P1P2	GCAGATTTTTCCAGGGTCAG
A2ML1_+_8975278.23-P1P2	h7_top5	A2ML1	P1P2	GTCTGCAATGGCTGGTGATA
A2ML1_+_8975452.23-P1P2	h7_supp5	A2ML1	P1P2	GAGCCTCCCTCTCTGGGTAA
A2ML1_-_8975403.23-P1P2	h7_supp5	A2ML1	P1P2	GGAGATGGGGAGATCAACTT
A2ML1_-_8975471.23-P1P2	h7_supp5	A2ML1	P1P2	GATCCTTTACCCAGAGAGGG
A2ML1_-_8975487.23-P1P2	h7_supp5	A2ML1	P1P2	GGGGAGGCTGACGCATGAAG
A2ML1_-_8975582.23-P1P2	h7_top5	A2ML1	P1P2	GAGGCATGTGTGCTCGGTGA
A2ML1_-_8975593.23-P1P2	h7_top5	A2ML1	P1P2	GCTCGGTGAGGGCCTCCTGA
A2ML1_-_8975664.23-P1P2	h7_top5	A2ML1	P1P2	Gaaaatgaggtgcataagga
A2ML1_-_8975669.23-P1P2	h7_supp5	A2ML1	P1P2	Ggaggtgcataaggaaggca
A2M_+_9268141.23-P1P2	h2_top5	A2M	P1P2	GAAtatgcaaagccttccta
A2M_+_9268487.23-P1P2	h2_top5	A2M	P1P2	GAGATGGATTGTAGGGAGTA
A2M_+_9268495.23-P1P2	h2_top5	A2M	P1P2	GTTGGGACCAGATGGATTGT
A2M_+_9268524.23-P1P2	h2_supp5	A2M	P1P2	GGCATAAAGCCCAGTTGCTT
A2M_-_9268044.23-P1P2	h2_supp5	A2M	P1P2	Gaaatggacccttgagaaag
A2M_-_9268273.23-P1P2	h2_top5	A2M	P1P2	GAAGAAGATGACAGTATCAT
A2M_-_9268326.23-P1P2	h2_supp5	A2M	P1P2	GGCAATAAATGAAGGACTCT
A2M_-_9268360.23-P1P2	h2_supp5	A2M	P1P2	GGCTCTCTGTGTGGAACTCA
A2M_-_9268387.23-P1P2	h2_top5	A2M	P1P2	GCAGAGACTGAGGCGTCTGT
A2M_-_9268427.23-P1P2	h2_supp5	A2M	P1P2	GAAGAACCAGACTTGGATGA
A3GALT2_+_33786262.23-ENST00000442999.3	h6_supp5	A3GALT2	ENST00000442999.3	GGTGCCCCCTTAAGACCTAA
A3GALT2_+_33786358.23-ENST00000442999.3	h6_supp5	A3GALT2	ENST00000442999.3	GCCGGAAAGCAGAGACCCGG
A3GALT2_+_33786467.23-ENST00000442999.3	h6_supp5	A3GALT2	ENST00000442999.3	GTCCGTGTGCATGGACACCG
A3GALT2_+_33786635.23-ENST00000442999.3	h6_supp5	A3GALT2	ENST00000442999.3	GTGGAGAGGAAGAAAGCTTG
A3GALT2_+_33786649.23-ENST00000442999.3	h6_top5	A3GALT2	ENST00000442999.3	GGGGGGACAATGGTATGGAG
A3GALT2_+_33786659.23-ENST00000442999.3	h6_top5	A3GALT2	ENST00000442999.3	GCTCAGGTGAGGGGGGACAA
A3GALT2_+_33786675.23-ENST00000442999.3	h6_top5	A3GALT2	ENST00000442999.3	GGGCTCTCAAGGAGGGACTC
A3GALT2_+_33786682.23-ENST00000442999.3	h6_top5	A3GALT2	ENST00000442999.3	GCCCATATGGCTCTCAAGGA
A3GALT2_-_33786237.23-ENST00000442999.3	h6_supp5	A3GALT2	ENST00000442999.3	GCCCTGCTCCCCACTCTCGT
A3GALT2_-_33786280.23-ENST00000442999.3	h6_top5	A3GALT2	ENST00000442999.3	GCAGCCATTAGGTCTTAAGG
A4GALT_+_43116425.23-P1P2	h2_top5	A4GALT	P1P2	GGGCTCTGCCCGGCCACCGT
A4GALT_+_43116792.23-P1P2	h2_top5	A4GALT	P1P2	GcTGGAGCTAGAGGTACGAG
A4GALT_-_43116413.23-P1P2	h2_supp5	A4GALT	P1P2	GCCAGGCTTCCCCCGGACGG
A4GALT_-_43116431.23-P1P2	h2_top5	A4GALT	P1P2	GGAGGAGCGCGACTCACCCA
A4GALT_-_43116434.23-P1P2	h2_top5	A4GALT	P1P2	GGAGCGCGACTCACCCACGG
A4GALT_-_43116460.23-P1P2	h2_supp5	A4GALT	P1P2	GGCAGAGCCTGCCTCGAACC
A4GALT_-_43116503.23-P1P2	h2_supp5	A4GALT	P1P2	GCCAGCCCCGGGACCCAACC
A4GALT_-_43116683.23-P1P2	h2_supp5	A4GALT	P1P2	GGAACAGGTGGCCCGGGCTA
A4GALT_-_43116819.23-P1P2	h2_top5	A4GALT	P1P2	GGTACCTCTAGCTCCAgcgg
A4GALT_-_43116823.23-P1P2	h2_supp5	A4GALT	P1P2	GCTCTAGCTCCAgcggcggc
A4GNT_+_137850764.23-P1P2	h7_supp5	A4GNT	P1P2	Gatgtcagtgacaatgacaa
A4GNT_+_137850968.23-P1P2	h7_top5	A4GNT	P1P2	Gcttgctaatcgtgtgatct
A4GNT_+_137851024.23-P1P2	h7_top5	A4GNT	P1P2	Gttcagagcctggactttgg
A4GNT_+_137851046.23-P1P2	h7_supp5	A4GNT	P1P2	GAGGAAAGCACTGCAGGtaa
A4GNT_+_137851070.23-P1P2	h7_supp5	A4GNT	P1P2	GTGGTTAGAGCTAACATTTT
A4GNT_+_137851178.23-P1P2	h7_top5	A4GNT	P1P2	GGCATTTGCAGCTAGAAGTT
A4GNT_-_137850791.23-P1P2	h7_supp5	A4GNT	P1P2	Gtcattgtcactgacatcat
A4GNT_-_137850879.23-P1P2	h7_supp5	A4GNT	P1P2	Gaagaggcaaaagtatctct
A4GNT_-_137851117.23-P1P2	h7_top5	A4GNT	P1P2	GGAACACAGATCTCACGTCT
A4GNT_-_137851121.23-P1P2	h7_top5	A4GNT	P1P2	GACAGATCTCACGTCTTGGC
AAAS_+_53714942.23-P1P2	h4_supp5	AAAS	P1P2	GTGGGATTGGAGTATAACGG
AAAS_+_53714983.23-P1P2	h4_top5	AAAS	P1P2	GCCCCGGCAGGAGGCTAGAA
AAAS_+_53715016.23-P1P2	h4_supp5	AAAS	P1P2	GGTCACAGAGTCTGGCGGAG
AAAS_+_53715355.23-P1P2	h4_top5	AAAS	P1P2	GCCTCGCCGTTTGTCCCTTG
AAAS_-_53715347.23-P1P2	h4_supp5	AAAS	P1P2	GCCCGGGCTAGATTCGTATG
AAAS_-_53715352.23-P1P2	h4_supp5	AAAS	P1P2	GGCTAGATTCGTATGCGGAC
AAAS_-_53715363.23-P1P2	h4_supp5	AAAS	P1P2	GATGCGGACGGGTACCGCAA
AAAS_-_53715371.23-P1P2	h4_top5	AAAS	P1P2	GGGGTACCGCAAGGGACAAA
AAAS_-_53715389.23-P1P2	h4_top5	AAAS	P1P2	GACGGCGAGGCGGAACTCAA
AAAS_-_53715438.23-P1P2	h4_top5	AAAS	P1P2	GAGGACGAGTACGCGGTCCC
AACS_+_125549974.23-P1P2	h2_supp5	AACS	P1P2	GCGGGGAACAAGGGACTGAA
AACS_+_125549983.23-P1P2	h2_top5	AACS	P1P2	GCGGCGGCGGCGGGGAACAA
AACS_+_125549999.23-P1P2	h2_top5	AACS	P1P2	GCGGGCTGGGTCAGCGACGG
AACS_+_125550002.23-P1P2	h2_top5	AACS	P1P2	GTGGCGGGCTGGGTCAGCGA
AACS_+_125550035.23-P1P2	h2_top5	AACS	P1P2	GctgggaccggagGAAGCGA
AACS_+_125550369.23-P1P2	h2_supp5	AACS	P1P2	GAGGCCTCCCCGCCATCAAG
AACS_+_125550406.23-P1P2	h2_supp5	AACS	P1P2	GGATGTTCCCCAAGACTGGG
AACS_-_125550169.23-P1P2	h2_top5	AACS	P1P2	GCCCGGTCGGGAGGAGATCC
AACS_-_125550187.23-P1P2	h2_supp5	AACS	P1P2	GCTGGAGTGCCAGGTGATGT
AACS_-_125550379.23-P1P2	h2_supp5	AACS	P1P2	GGGCTGGAGGAGCCACTTGA
AADACL2_+_151451732.23-P1P2	h1_top5	AADACL2	P1P2	GGTAGAGCAATTGTAGACTT
AADACL2_+_151451892.23-P1P2	h1_supp5	AADACL2	P1P2	GAGCTTTCTTCAATGTTGTC
AADACL2_+_151451926.23-P1P2	h1_top5	AADACL2	P1P2	GGTTTTAGCGATGGCATCCA
AADACL2_+_151451935.23-P1P2	h1_supp5	AADACL2	P1P2	GAATGTACAAGTTTTAGCGA
AADACL2_+_151452057.23-P1P2	h1_supp5	AADACL2	P1P2	GAGCAATGGTTCTTTCAAAA
AADACL2_+_151452121.23-P1P2	h1_top5	AADACL2	P1P2	GACTGTTACTCACAGATATA
AADACL2_-_151451828.23-P1P2	h1_top5	AADACL2	P1P2	GTGGAAAAAGGGATATTATG
AADACL2_-_151451931.23-P1P2	h1_supp5	AADACL2	P1P2	GAGCTGGAAAATAATGGCCT
AADACL2_-_151451961.23-P1P2	h1_top5	AADACL2	P1P2	GGCTAAAACTTGTACATTTA
AADACL2_-_151452019.23-P1P2	h1_supp5	AADACL2	P1P2	GATGACTTATTGACTAAAAA
AADACL3_+_12776115.23-P1P2	h6_top5	AADACL3	P1P2	GGTGGAAACCATTTAGGACA
AADACL3_+_12776121.23-P1P2	h6_supp5	AADACL3	P1P2	GTGCGCAGTGGAAACCATTT
AADACL3_+_12776133.23-P1P2	h6_top5	AADACL3	P1P2	GGAGAGGAAGCTGTGCGCAG
AADACL3_+_12776213.23-P1P2	h6_top5	AADACL3	P1P2	GACCCCTAGTGAGAACACTC
AADACL3_+_12776313.23-P1P2	h6_top5	AADACL3	P1P2	GCAGCTGGAAGATGCAATGG
AADACL3_+_12776369.23-P1P2	h6_supp5	AADACL3	P1P2	GCCTTAATGGTCAGCTGGAG
AADACL3_+_12776495.23-P1P2	h6_top5	AADACL3	P1P2	GGGCTGAGAACCACCTAATA
AADACL3_-_12776129.23-P1P2	h6_supp5	AADACL3	P1P2	GCTCTGAACCATGTCCTAAA
AADACL3_-_12776233.23-P1P2	h6_supp5	AADACL3	P1P2	GGCCTGAGTGTTCTCACTAG
AADACL3_-_12776507.23-P1P2	h6_supp5	AADACL3	P1P2	GGTGCATAATCCCTATTAGG
AADACL4_+_12704492.23-P1P2	h6_supp5	AADACL4	P1P2	GATGTGAAGAGGACCTGGCT
AADACL4_+_12704556.23-P1P2	h6_supp5	AADACL4	P1P2	GAGGGGACAGCCATGTTCCT
AADACL4_+_12704573.23-P1P2	h6_top5	AADACL4	P1P2	GCAAGAGTAGCACTAGCCAG
AADACL4_+_12704601.23-P1P2	h6_top5	AADACL4	P1P2	GAGACCCCCAGGAAAAAGAT
AADACL4_+_12704653.23-P1P2	h6_top5	AADACL4	P1P2	GAAGGTAGCAGGGATATCCG
AADACL4_+_12704686.23-P1P2	h6_supp5	AADACL4	P1P2	GCAATGCAGGAATCTCAACT
AADACL4_+_12704714.23-P1P2	h6_top5	AADACL4	P1P2	GCACCAAAGTGACCAGGTAG
AADACL4_+_12704720.23-P1P2	h6_supp5	AADACL4	P1P2	GTAAACTCACCAAAGTGACC
AADACL4_+_12704750.23-P1P2	h6_supp5	AADACL4	P1P2	GAAGCCCCCAGGTTACGACG
AADACL4_-_12704768.23-P1P2	h6_top5	AADACL4	P1P2	GAGGCCACGTCGTAACCTGG
AADAC_+_151532013.23-P1P2	h3_top5	AADAC	P1P2	GCCTCAACGTTATCTGGGAG
AADAC_+_151532125.23-P1P2	h3_supp5	AADAC	P1P2	GAATTCTCTGGGTCAAATGG
AADAC_+_151532371.23-P1P2	h3_top5	AADAC	P1P2	GCCTAAGATAAGAATTTCAA
AADAC_-_151531905.23-P1P2	h3_top5	AADAC	P1P2	GCTATTCAGGCATATCATGT
AADAC_-_151531939.23-P1P2	h3_top5	AADAC	P1P2	GGTTTCTAGAGACCAAGAAG
AADAC_-_151531954.23-P1P2	h3_top5	AADAC	P1P2	GGAAGCGGGACGTTCACCAT
AADAC_-_151531985.23-P1P2	h3_supp5	AADAC	P1P2	GGCTGTACCTTCTGATTGTG
AADAC_-_151532317.23-P1P2	h3_supp5	AADAC	P1P2	GAGCAAGGAGTCATTTGAAT
AADAC_-_151532366.23-P1P2	h3_supp5	AADAC	P1P2	GAGCTTTAATATCACGATAG
AADAC_-_151532397.23-P1P2	h3_supp5	AADAC	P1P2	GGAAATTCTTATCTTAGGTA
AADAT_+_171010904.23-P1P2	h1_top5	AADAT	P1P2	GTAGCAGGCAGGACTTGACG
AADAT_+_171010929.23-P1P2	h1_top5	AADAT	P1P2	GCGGTGGCGTTGCCAGAGTG
AADAT_+_171011005.23-P1P2	h1_supp5	AADAT	P1P2	GTCCAGCCGGGGAGTTTCGG
AADAT_+_171011279.23-P1P2	h1_supp5	AADAT	P1P2	GCGGCGAGGTCAAGAGTCAT
AADAT_+_171011325.23-P1P2	h1_supp5	AADAT	P1P2	GGCGCCTAGGCCGGCCAACG
AADAT_+_171011392.23-P1P2	h1_top5	AADAT	P1P2	GTCCCGAGGATTAGGATCAC
AADAT_-_171011321.23-P1P2	h1_top5	AADAT	P1P2	GGCTGGGAATCACCGCAACC
AADAT_-_171011333.23-P1P2	h1_supp5	AADAT	P1P2	GCGCAACCCGGCGTCCGCGT
AADAT_-_171011368.23-P1P2	h1_top5	AADAT	P1P2	GCGGCCCAGAGGCTAGCCCA
AADAT_-_171011381.23-P1P2	h1_supp5	AADAT	P1P2	GAGCCCAGGGGCTGACCGAG
AAED1_+_99417117.23-P1P2	h7_top5	AAED1	P1P2	GTCACGCACGGCGAAGTACA
AAED1_+_99417228.23-P1P2	h7_supp5	AAED1	P1P2	GCCGCTTCCCAACTAGGGCG
AAED1_+_99417233.23-P1P2	h7_top5	AAED1	P1P2	GCGCGGCCGCTTCCCAACTA
AAED1_+_99417483.23-P1P2	h7_supp5	AAED1	P1P2	GCCCCGAGCGGCCCCGACAG
AAED1_+_99417525.23-P1P2	h7_top5	AAED1	P1P2	GCGGTCACGCGGCAGGTTAG
AAED1_+_99417589.23-P1P2	h7_top5	AAED1	P1P2	GccggtccgcgctgACAGAG
AAED1_-_99417150.23-P1P2	h7_supp5	AAED1	P1P2	GCCGTGCGTGACGCGAGCAA
AAED1_-_99417451.23-P1P2	h7_supp5	AAED1	P1P2	GGCCCGCGGGCGTCCAGCAC
AAED1_-_99417574.23-P1P2	h7_top5	AAED1	P1P2	GGCGCGGCCATGACGCGGGG
AAED1_-_99417581.23-P1P2	h7_supp5	AAED1	P1P2	GCATGACGCGGGGCGGCCGA
AAGAB_+_67546560.23-P1P2	h7_supp5	AAGAB	P1P2	Ggctaggttacaggagtgta
AAGAB_+_67546965.23-P1P2	h7_top5	AAGAB	P1P2	GCGGCTCGCGAGCGCAGCTA
AAGAB_+_67546984.23-P1P2	h7_supp5	AAGAB	P1P2	GAGCGGCTGCCTGACGGAAC
AAGAB_-_67546617.23-P1P2	h7_supp5	AAGAB	P1P2	Ggccttcaggttcatctcaa
AAGAB_-_67546714.23-P1P2	h7_top5	AAGAB	P1P2	GACGCCGAAGAAGGCCGAGT
AAGAB_-_67546743.23-P1P2	h7_supp5	AAGAB	P1P2	GGCACGAGATTAAGAGATAG
AAGAB_-_67546780.23-P1P2	h7_supp5	AAGAB	P1P2	GACTGGGCGCCTCCACTGAC
AAGAB_-_67546928.23-P1P2	h7_top5	AAGAB	P1P2	GTGGTCTCCTGAGAAGACGG
AAGAB_-_67546952.23-P1P2	h7_top5	AAGAB	P1P2	GCAGCTGGTGACTAACGCAC
AAGAB_-_67546997.23-P1P2	h7_top5	AAGAB	P1P2	GCTCGCGAGCCGGTTCCGTC
AAK1_+_69870290.23-P1P2	h1_top5	AAK1	P1P2	GCCCCACGGCCGGATTCGGG
AAK1_+_69870701.23-P1P2	h1_top5	AAK1	P1P2	GCCGCCGAGCCGTCTCAAGT
AAK1_+_69870743.23-P1P2	h1_supp5	AAK1	P1P2	GGGCGGCCGTGACAATGTCG
AAK1_-_69870339.23-P1P2	h1_supp5	AAK1	P1P2	GGCTGAGGGAGGATGCCTAT
AAK1_-_69870541.23-P1P2	h1_top5	AAK1	P1P2	GCCCGGCGAGAAAAACCGTG
AAK1_-_69870640.23-P1P2	h1_supp5	AAK1	P1P2	GCGGCAGCGCCGACCCTCCC
AAK1_-_69870719.23-P1P2	h1_supp5	AAK1	P1P2	GGCACCCACTTGAGACGGCT
AAK1_-_69870759.23-P1P2	h1_supp5	AAK1	P1P2	GCAGCCCCGCGACATTGTCA
AAK1_-_69870791.23-P1P2	h1_top5	AAK1	P1P2	GGGCCTGCGACGCAGAGAAG
AAK1_-_69870794.23-P1P2	h1_top5	AAK1	P1P2	GCTGCGACGCAGAGAAGAGG
AAMDC_+_77532426.23-P1P2	h7_top5	AAMDC	P1P2	GCAGCCCAGCCCCTAATTAA
AAMDC_-_77532187.23-P1P2	h7_top5	AAMDC	P1P2	GTGCAGGGCGTATTCCCGGA
AAMDC_-_77532195.23-P1P2	h7_supp5	AAMDC	P1P2	GGTATTCCCGGAGGGCAGTT
AAMDC_-_77532222.23-P1P2	h7_top5	AAMDC	P1P2	GCAGATCCCGAAGCAGCGCT
AAMDC_-_77532236.23-P1P2	h7_top5	AAMDC	P1P2	GGCGCTGGGAGCGTAAGTGC
AAMDC_-_77532439.23-P1P2	h7_supp5	AAMDC	P1P2	GGAGGTGTGCCCTTAATTAG
AAMDC_-_77532634.23-P1P2	h7_top5	AAMDC	P1P2	GGAGACCAGGCTCTGCTAGG
AAMDC_-_77532649.23-P1P2	h7_supp5	AAMDC	P1P2	GTAGGGGGCCATGGTGTGAG
AAMDC_-_77532686.23-P1P2	h7_supp5	AAMDC	P1P2	GGGGACCAGAATCGGAGTGT
AAMDC_-_77532705.23-P1P2	h7_supp5	AAMDC	P1P2	GGGGCTGGGACTCCATTGAG
AAMP_+_219134841.23-P1P2	h3_top5	AAMP	P1P2	GGCTGACTCTGGGAGGCGTT
AAMP_+_219134851.23-P1P2	h3_top5	AAMP	P1P2	GGTCGCGCAGAGCTGACTCT
AAMP_-_219134310.23-P1P2	h3_supp5	AAMP	P1P2	GCGGGAGGCGGTAAGAGGTA
AAMP_-_219134415.23-P1P2	h3_top5	AAMP	P1P2	GGGCGCGCGGGACACAGGAC
AAMP_-_219134418.23-P1P2	h3_supp5	AAMP	P1P2	GGCGCGGGACACAGGACGGG
AAMP_-_219134424.23-P1P2	h3_top5	AAMP	P1P2	GGACACAGGACGGGAGGCCA
AAMP_-_219134443.23-P1P2	h3_supp5	AAMP	P1P2	GCGGCTGGCCAGAGACCGTG
AAMP_-_219134449.23-P1P2	h3_supp5	AAMP	P1P2	GGCCAGAGACCGTGCGGTAA
AAMP_-_219134453.23-P1P2	h3_supp5	AAMP	P1P2	GGAGACCGTGCGGTAAGGGA
AAMP_-_219134469.23-P1P2	h3_top5	AAMP	P1P2	GGGAGGGCCAAGGGGATGAT
AANAT_+_74463710.23-P1P2	h1_supp5	AANAT	P1P2	GCAGTAAAATCCGGGACTCC
AANAT_+_74463718.23-P1P2	h1_top5	AANAT	P1P2	GACGGGAACCAGTAAAATCC
AANAT_+_74463735.23-P1P2	h1_top5	AANAT	P1P2	GGGGGCCTGTCCGCAGGCAC
AANAT_+_74463793.23-P1P2	h1_supp5	AANAT	P1P2	GACCTACCTGGACTGTGGAG
AANAT_+_74464038.23-P1P2	h1_supp5	AANAT	P1P2	GGCAGGCAAGGAGAGTGCAT
AANAT_+_74464088.23-P1P2	h1_top5	AANAT	P1P2	GGGAGGTTAGAGGGAGCCGG
AANAT_+_74464143.23-P1P2	h1_supp5	AANAT	P1P2	GATCCAGATGGCCTCAGACT
AANAT_-_74463789.23-P1P2	h1_supp5	AANAT	P1P2	GGCTTTGTGGAGGGAACACT
AANAT_-_74464175.23-P1P2	h1_top5	AANAT	P1P2	GGCCATCTGGATAGAAGTAG
AANAT_-_74464185.23-P1P2	h1_top5	AANAT	P1P2	GTAGAAGTAGAGGCTCCCTA
AAR2_+_34824386.23-P1P2	h7_top5	AAR2	P1P2	GCGGTACAGCGGAAACGCAC
AAR2_+_34824405.23-P1P2	h7_supp5	AAR2	P1P2	GACCGCCTCGCCCCACGTTC
AAR2_+_34824485.23-P1P2	h7_supp5	AAR2	P1P2	GTCTGAGCCGAGAAGAGGGG
AAR2_+_34824488.23-P1P2	h7_top5	AAR2	P1P2	GGACTCTGAGCCGAGAAGAG
AAR2_+_34824655.23-P1P2	h7_supp5	AAR2	P1P2	Ggccaggtcgagtgcaatca
AAR2_+_34824681.23-P1P2	h7_top5	AAR2	P1P2	Gggaagtcacgcagagagta
AAR2_-_34824417.23-P1P2	h7_top5	AAR2	P1P2	GTCCGCTGTACCGGAACGTG
AAR2_-_34824425.23-P1P2	h7_top5	AAR2	P1P2	GACCGGAACGTGGGGCGAGG
AAR2_-_34824434.23-P1P2	h7_supp5	AAR2	P1P2	GTGGGGCGAGGCGGTGAGTG
AAR2_-_34824937.23-P1P2	h7_supp5	AAR2	P1P2	Ggagacctgacctagcccca
AARD_+_117950477.23-P1P2	h7_top5	AARD	P1P2	GAAGTCCCCGGGGCCCATCG
AARD_+_117950489.23-P1P2	h7_top5	AARD	P1P2	GCTGCAGCGGCGGAAGTCCC
AARD_+_117950882.23-P1P2	h7_top5	AARD	P1P2	Gaggcgtcgggtgggctacg
AARD_+_117950890.23-P1P2	h7_top5	AARD	P1P2	Ggccccccaaggcgtcgggt
AARD_+_117950901.23-P1P2	h7_supp5	AARD	P1P2	Gagacctgaggggcccccca
AARD_+_117950911.23-P1P2	h7_supp5	AARD	P1P2	Gcgccgtgtccagacctgag
AARD_-_117950494.23-P1P2	h7_top5	AARD	P1P2	GGTCTCCGCGATGGGCCCCG
AARD_-_117950667.23-P1P2	h7_supp5	AARD	P1P2	GGCTGGAGGACCTCAGACGA
AARD_-_117950692.23-P1P2	h7_supp5	AARD	P1P2	GACGCGCGCCTTCCAGTGGG
AARD_-_117950728.23-P1P2	h7_supp5	AARD	P1P2	GTCGAGGCGCGTGCAGGAgg
AARS2_+_44280645.23-P1P2	h1_supp5	AARS2	P1P2	GGGCGCTCAGAGTATAGGGA
AARS2_+_44280650.23-P1P2	h1_top5	AARS2	P1P2	GGGTACGGCGCTCAGAGTAT
AARS2_+_44280670.23-P1P2	h1_supp5	AARS2	P1P2	GTGGTTGGGTAAAGTGATGG
AARS2_+_44281006.23-P1P2	h1_top5	AARS2	P1P2	GGCTGCGGCGGGCCATTCGA
AARS2_+_44281027.23-P1P2	h1_top5	AARS2	P1P2	GAGTGGCAGCTGCAGCCCGG
AARS2_+_44281044.23-P1P2	h1_top5	AARS2	P1P2	GGCTACGATGGCAGCGTCAG
AARS2_+_44281056.23-P1P2	h1_top5	AARS2	P1P2	GTCACTGCCCGGAGCTACGA
AARS2_-_44280878.23-P1P2	h1_supp5	AARS2	P1P2	GCCGCGGGGCCGCACGGAAG
AARS2_-_44281001.23-P1P2	h1_supp5	AARS2	P1P2	GTGGCTGAGGCCCCGCCATG
AARS2_-_44281016.23-P1P2	h1_supp5	AARS2	P1P2	GCATGCGGGCGACCTTCGAA
AARSD1_+_41116203.23-P1	h5_top5	AARSD1	P1	GCGCGGAGCTGCAGACTGAA
AARSD1_+_41116343.23-P1	h5_supp5	AARSD1	P1	GGGAAGAGGGCGCCACGTGT
AARSD1_+_41116412.23-P1	h5_top5	AARSD1	P1	GCAGTTATGCCCGAGAGGTA
AARSD1_+_41116417.23-P1	h5_top5	AARSD1	P1	GCGTGACAGTTATGCCCGAG
AARSD1_+_41132061.23-P2	h5_top5	AARSD1	P2	GAGCGGGAGCCGCAATGGCA
AARSD1_+_41132078.23-P2	h5_top5	AARSD1	P2	GTCTAAATGCCACCCTGGAG
AARSD1_-_41116054.23-P1	h5_supp5	AARSD1	P1	GCATTATGGCTGAGAAAAAA
AARSD1_-_41116243.23-P1	h5_top5	AARSD1	P1	GGCGGGACAGCAGGAGACCA
AARSD1_-_41116425.23-P1	h5_top5	AARSD1	P1	GCCGTGACGCCGTACCTCTC
AARSD1_-_41116465.23-P1	h5_supp5	AARSD1	P1	GACCAGAACGCCATACCTGC
AARSD1_-_41116499.23-P1	h5_supp5	AARSD1	P1	GCGCACGCGCAGAGAAGCCT
AARSD1_-_41116508.23-P1	h5_supp5	AARSD1	P1	GAGAGAAGCCTGGGAGCGAA
AARSD1_-_41131671.23-P2	h5_supp5	AARSD1	P2	GCTGTCGTACCACAAGGTCC
AARSD1_-_41131701.23-P2	h5_supp5	AARSD1	P2	GCTGAAGAGAAGTTGAGGTG
AARSD1_-_41131712.23-P2	h5_top5	AARSD1	P2	GTTGAGGTGTGGCTTCATAG
AARSD1_-_41131716.23-P2	h5_supp5	AARSD1	P2	GGGTGTGGCTTCATAGGGGT
AARSD1_-_41132004.23-P2	h5_supp5	AARSD1	P2	GCTGGAGCGCCCAGAAGACT
AARSD1_-_41132022.23-P2	h5_supp5	AARSD1	P2	GTTGGAGCAGGGAATCTCCA
AARSD1_-_41132037.23-P2	h5_top5	AARSD1	P2	GTCCAGGGAAAAGGGCCAGG
AARSD1_-_41132088.23-P2	h5_top5	AARSD1	P2	GCATTGCGGCTCCCGCTCCA
AARS_+_70323296.23-P1P2	h1_supp5	AARS	P1P2	GCCGCCCTCGGAGAGCTCTG
AARS_+_70323318.23-P1P2	h1_top5	AARS	P1P2	GCGGCGACCCTAGGAGAGGT
AARS_+_70323322.23-P1P2	h1_top5	AARS	P1P2	GGGGACGGCGACCCTAGGAG
AARS_+_70323353.23-P1P2	h1_top5	AARS	P1P2	GCCCTTGGCGGGGGACTCTG
AARS_+_70323362.23-P1P2	h1_top5	AARS	P1P2	GTGCAGCGGGCCCTTGGCGG
AARS_+_70323368.23-P1P2	h1_supp5	AARS	P1P2	GAATAGGTGCAGCGGGCCCT
AARS_+_70323376.23-P1P2	h1_supp5	AARS	P1P2	GTCTGCGGGAATAGGTGCAG
AARS_-_70322952.23-P1P2	h1_supp5	AARS	P1P2	GGGTCTCGGTGCGCCTGGAC
AARS_-_70323314.23-P1P2	h1_supp5	AARS	P1P2	GGCACCGCAGAGCTCTCCGA
AARS_-_70323332.23-P1P2	h1_top5	AARS	P1P2	GAGGGCGGCCTACCTCTCCT
AASDHPPT_+_105948405.23-P1P2	h3_top5	AASDHPPT	P1P2	GCGGACCTCGCCGCTATCTC
AASDHPPT_+_105948450.23-P1P2	h3_top5	AASDHPPT	P1P2	GGGCACCAAGCAGAACCGTT
AASDHPPT_+_105948470.23-P1P2	h3_supp5	AASDHPPT	P1P2	GAGCGCACGCCCTCCATGGA
AASDHPPT_+_105948804.23-P1P2	h3_supp5	AASDHPPT	P1P2	GGCCTCCAAGGCGGTTACAA
AASDHPPT_+_105948813.23-P1P2	h3_top5	AASDHPPT	P1P2	GGCCATCGCGGCCTCCAAGG
AASDHPPT_+_105948816.23-P1P2	h3_supp5	AASDHPPT	P1P2	GACAGCCATCGCGGCCTCCA
AASDHPPT_-_105948374.23-P1P2	h3_top5	AASDHPPT	P1P2	GACGGACGCCGGGAAGAAGG
AASDHPPT_-_105948417.23-P1P2	h3_top5	AASDHPPT	P1P2	GGCCATCAGGCCCGAGATAG
AASDHPPT_-_105948422.23-P1P2	h3_supp5	AASDHPPT	P1P2	GCAGGCCCGAGATAGCGGCG
AASDHPPT_-_105948779.23-P1P2	h3_supp5	AASDHPPT	P1P2	GGCCGGCGCTGCGGAGTTGT
AASDH_+_57253516.23-P1P2	h4_supp5	AASDH	P1P2	GAGACTTGCTAAGTGAGTCG
AASDH_+_57253570.23-P1P2	h4_top5	AASDH	P1P2	GTATCCGCGACGAGCTATCC
AASDH_+_57253636.23-P1P2	h4_supp5	AASDH	P1P2	GTACGTATGGTGCCTCGCTC
AASDH_+_57253649.23-P1P2	h4_supp5	AASDH	P1P2	GGACGCGGAAGATTTACGTA
AASDH_-_57253280.23-P1P2	h4_top5	AASDH	P1P2	Gtcttcgaaaccactctagg
AASDH_-_57253356.23-P1P2	h4_top5	AASDH	P1P2	GGACGCAGGAGTGTACACAC
AASDH_-_57253362.23-P1P2	h4_top5	AASDH	P1P2	GGGAGTGTACACACAGGTCA
AASDH_-_57253574.23-P1P2	h4_supp5	AASDH	P1P2	GATCGCATTCGGCCCTTTCC
AASDH_-_57253588.23-P1P2	h4_top5	AASDH	P1P2	GTTTCCCGGATAGCTCGTCG
AASDH_-_57253646.23-P1P2	h4_supp5	AASDH	P1P2	GGTAAAGCTATCCCAGAGCG
AASS_+_121784000.23-P1P2	h1_top5	AASS	P1P2	GCCTCCCTGCGAGGAATGGA
AASS_+_121784213.23-P1P2	h1_supp5	AASS	P1P2	GCGGCGCCCCAGAGCGGACG
AASS_+_121784219.23-P1P2	h1_top5	AASS	P1P2	GACAAGTCGGCGCCCCAGAG
AASS_+_121784247.23-P1P2	h1_top5	AASS	P1P2	GCGACTCGGAAGATTCGAGG
AASS_+_121784250.23-P1P2	h1_supp5	AASS	P1P2	GCAGCGACTCGGAAGATTCG
AASS_-_121784091.23-P1P2	h1_supp5	AASS	P1P2	GTCGCGGCGCCGGGACCCGA
AASS_-_121784229.23-P1P2	h1_supp5	AASS	P1P2	GCCTCACCTCGTCCGCTCTG
AASS_-_121784277.23-P1P2	h1_top5	AASS	P1P2	GATCTTCCGAGTCGCTGCAG
AASS_-_121784313.23-P1P2	h1_supp5	AASS	P1P2	GTAGAAGAAACTGGGATGGA
AASS_-_121784328.23-P1P2	h1_top5	AASS	P1P2	GTGGAAGGCCGGGAAGTAGG
AATF_+_35306366.23-P1P2	h2_supp5	AATF	P1P2	GAAATGTGCGGCCCAACCCC
AATF_+_35306650.23-P1P2	h2_supp5	AATF	P1P2	GGAGGCCGGGACCACCCTCG
AATF_-_35306286.23-P1P2	h2_top5	AATF	P1P2	GAGTGGCCGGTCCAGAGCTG
AATF_-_35306312.23-P1P2	h2_top5	AATF	P1P2	GGCCTCCGCGCGGTCTCTGG
AATF_-_35306320.23-P1P2	h2_supp5	AATF	P1P2	GGCGGTCTCTGGCGGAGTCG
AATF_-_35306333.23-P1P2	h2_top5	AATF	P1P2	GGAGTCGGGGAATCGGATCA
AATF_-_35306340.23-P1P2	h2_top5	AATF	P1P2	GGGAATCGGATCAAGGCGAG
AATF_-_35306346.23-P1P2	h2_top5	AATF	P1P2	GGGATCAAGGCGAGAGGATC
AATF_-_35306351.23-P1P2	h2_supp5	AATF	P1P2	GAAGGCGAGAGGATCCGGCA
AATF_-_35306747.23-P1P2	h2_supp5	AATF	P1P2	GGATGGGCGGAACAGATCGA
AATK_+_79139544.23-ENST00000326724.4	h1_supp5	AATK	ENST00000326724.4	GCCTGGGCCCCAGCACAAAC
AATK_+_79139571.23-ENST00000326724.4	h1_top5	AATK	ENST00000326724.4	GGCGGCCCCAGATCTCGGAG
AATK_+_79139589.23-ENST00000326724.4	h1_top5	AATK	ENST00000326724.4	GAAGCAGCCGGACCCCCTGG
AATK_+_79139592.23-ENST00000326724.4	h1_top5	AATK	ENST00000326724.4	GCAGAAGCAGCCGGACCCCC
AATK_-_79139586.23-ENST00000326724.4	h1_top5	AATK	ENST00000326724.4	GGGCCTGCCCCTCCGAGATC
AATK_-_79139702.23-ENST00000326724.4	h1_supp5	AATK	ENST00000326724.4	GTCACGTCCGCAGCGGAGGG
AATK_-_79139880.23-ENST00000326724.4	h1_supp5	AATK	ENST00000326724.4	GgagccgccgcATCACCCAG
AATK_-_79139956.23-ENST00000326724.4	h1_top5	AATK	ENST00000326724.4	GCGCAGAGCCCGCACCGGTG
AATK_-_79139960.23-ENST00000326724.4	h1_supp5	AATK	ENST00000326724.4	GGAGCCCGCACCGGTGGGGG
AATK_-_79139975.23-ENST00000326724.4	h1_supp5	AATK	ENST00000326724.4	GGGGGCGGCGGCGACAGACG
ABAT_+_8768492.23-P1	h1_top5	ABAT	P1	GGGATGCGCGCCCCGAGTTC
ABAT_+_8768526.23-P1	h1_supp5	ABAT	P1	GCTGCGGGATCCGATCCGCC
ABAT_+_8768542.23-P1	h1_supp5	ABAT	P1	GAGGCCCCGTCTCCGATCTG
ABAT_+_8768682.23-P1	h1_top5	ABAT	P1	GCCGCGTCTTGGGAAGATGA
ABAT_+_8768874.23-P1	h1_supp5	ABAT	P1	GAGTCTCCCAAGAGGTGAGG
ABAT_+_8807437.23-P2	h1_supp5	ABAT	P2	GGCGCAAGGGAGAGGGACGG
ABAT_+_8807445.23-P2	h1_top5	ABAT	P2	GCGGCAAGTGCGCAAGGGAG
ABAT_+_8807450.23-P2	h1_top5	ABAT	P2	GGTACCCGGCAAGTGCGCAA
ABAT_+_8807464.23-P2	h1_top5	ABAT	P2	GGATGCACTCAGCTGGTACC
ABAT_+_8807492.23-P2	h1_top5	ABAT	P2	GCTTGGAAGCAGAGCAGGTT
ABAT_+_8807600.23-P2	h1_supp5	ABAT	P2	GCATCCTAAGAGGTGCCGTT
ABAT_+_8807610.23-P2	h1_supp5	ABAT	P2	GTGGCTGGGTTCATCCTAAG
ABAT_+_8807696.23-P2	h1_top5	ABAT	P2	GCCTGGTAGTCGGAGTCCTG
ABAT_+_8807706.23-P2	h1_supp5	ABAT	P2	GACTCACGGTGCCTGGTAGT
ABAT_+_8807798.23-P2	h1_supp5	ABAT	P2	GAACAGGCACTGACAGACAC
ABAT_-_8768466.23-P1	h1_supp5	ABAT	P1	GGGAGTCCGGCGAGTCGCTG
ABAT_-_8768504.23-P1	h1_top5	ABAT	P1	GCCAGCGCTGCCGGAACTCG
ABAT_-_8768523.23-P1	h1_top5	ABAT	P1	GGGGCGCGCATCCCGCAAGT
ABAT_-_8768530.23-P1	h1_supp5	ABAT	P1	GCATCCCGCAAGTCGGAACC
ABAT_-_8768533.23-P1	h1_top5	ABAT	P1	GCCCGCAAGTCGGAACCCGG
ABCA10_+_67224502.23-P1P2	h6_supp5	ABCA10	P1P2	GGAAAGATGGCTAGATTCAG
ABCA10_+_67224811.23-P1P2	h6_top5	ABCA10	P1P2	GAAGAGGCAACCATTTGTAG
ABCA10_+_67224827.23-P1P2	h6_supp5	ABCA10	P1P2	GATCAAAACAGTTTTAAAAG
ABCA10_+_67224916.23-P1P2	h6_supp5	ABCA10	P1P2	GTGGACAAGGAGAAAAACAT
ABCA10_+_67224929.23-P1P2	h6_top5	ABCA10	P1P2	GTCTGAAGAGTAACTGGACA
ABCA10_-_67224447.23-P1P2	h6_top5	ABCA10	P1P2	GAACCATACAAATTCTCAAA
ABCA10_-_67224767.23-P1P2	h6_top5	ABCA10	P1P2	GTTGAAGCACTTGGATCCAC
ABCA10_-_67224823.23-P1P2	h6_top5	ABCA10	P1P2	GTCAAGGACTCCTCTACAAA
ABCA10_-_67224857.23-P1P2	h6_supp5	ABCA10	P1P2	GAAACTGTTTTGATTCAGCT
ABCA10_-_67224969.23-P1P2	h6_supp5	ABCA10	P1P2	GAGAGAGTGTAATGAATTGT
ABCA12_+_216002868.23-P1P2	h3_supp5	ABCA12	P1P2	GAAATTGGCTAGGTGTAAAA
ABCA12_+_216002883.23-P1P2	h3_supp5	ABCA12	P1P2	GGATCCTGGTCTGGAAAAAT
ABCA12_+_216002996.23-P1P2	h3_top5	ABCA12	P1P2	GACATACAGCAAGTTGGACG
ABCA12_+_216003308.23-P1P2	h3_top5	ABCA12	P1P2	GCATGGAGAGTAGGAGGTGT
ABCA12_+_216003314.23-P1P2	h3_top5	ABCA12	P1P2	GTAATTTCATGGAGAGTAGG
ABCA12_+_216003317.23-P1P2	h3_supp5	ABCA12	P1P2	GAATTAATTTCATGGAGAGT
ABCA12_+_216003325.23-P1P2	h3_supp5	ABCA12	P1P2	GGGATAGGCAATTAATTTCA
ABCA12_+_216003340.23-P1P2	h3_top5	ABCA12	P1P2	GTGTTCTCTAAGGTGTGGAT
ABCA12_-_216002923.23-P1P2	h3_top5	ABCA12	P1P2	GATCTGAAGCTGATGAAACA
ABCA12_-_216003059.23-P1P2	h3_supp5	ABCA12	P1P2	GCACGGCATAGCTTCCTTGA
ABCA13_+_48211090.23-P1P2	h2_top5	ABCA13	P1P2	GAGGGCTTTGAACTGGCACC
ABCA13_+_48211097.23-P1P2	h2_top5	ABCA13	P1P2	GCCACAGCAGGGCTTTGAAC
ABCA13_+_48211145.23-P1P2	h2_top5	ABCA13	P1P2	GACCAAGGCAAGCACTCACC
ABCA13_+_48211160.23-P1P2	h2_top5	ABCA13	P1P2	GGGAACCCTATGGAAAACCA
ABCA13_+_48211170.23-P1P2	h2_supp5	ABCA13	P1P2	GAGACCTCACTGGAACCCTA
ABCA13_-_48211093.23-P1P2	h2_top5	ABCA13	P1P2	GCAGCAGGCATGGGGCATGC
ABCA13_-_48211142.23-P1P2	h2_supp5	ABCA13	P1P2	GGAATTGGCTCTGCAGACTC
ABCA13_-_48211206.23-P1P2	h2_supp5	ABCA13	P1P2	GGAGGTCTGGAGCAAGATCA
ABCA13_-_48211352.23-P1P2	h2_supp5	ABCA13	P1P2	GAATGACCAGGATGAAATCA
ABCA13_-_48211482.23-P1P2	h2_supp5	ABCA13	P1P2	GAACTGAACAGTGAATTCTC
ABCA1_+_107689930.23-P1P2	h2_supp5	ABCA1	P1P2	GCGCAGTACCCCGGGCTCAG
ABCA1_+_107689978.23-P1P2	h2_supp5	ABCA1	P1P2	GTGCCCGACGGTGGAGACCG
ABCA1_+_107690410.23-P1P2	h2_supp5	ABCA1	P1P2	GTTGCGAGCGAGAGTGAGTG
ABCA1_-_107689997.23-P1P2	h2_top5	ABCA1	P1P2	GCTCCCCGGTCTCCACCGTC
ABCA1_-_107690031.23-P1P2	h2_top5	ABCA1	P1P2	GGCAGCAGCGCAGAGTCCTG
ABCA1_-_107690202.23-P1P2	h2_supp5	ABCA1	P1P2	GTAACGCCCAAGTAAGTCAC
ABCA1_-_107690338.23-P1P2	h2_supp5	ABCA1	P1P2	GCCCTGAGAACCGGCTCTGT
ABCA1_-_107690385.23-P1P2	h2_top5	ABCA1	P1P2	GGCCGCAGCCCGGGAGAGAA
ABCA1_-_107690389.23-P1P2	h2_top5	ABCA1	P1P2	GCAGCCCGGGAGAGAAGGGT
ABCA1_-_107690394.23-P1P2	h2_top5	ABCA1	P1P2	GCGGGAGAGAAGGGTCGGCT
ABCA2_+_139922190.23-P1P2	h3_top5	ABCA2	P1P2	GCAGGACTCTGGCTCGAGGG
ABCA2_+_139922193.23-P1P2	h3_supp5	ABCA2	P1P2	GGCTCAGGACTCTGGCTCGA
ABCA2_+_139922201.23-P1P2	h3_top5	ABCA2	P1P2	GCAAGCGGCGCTCAGGACTC
ABCA2_+_139922272.23-P1P2	h3_top5	ABCA2	P1P2	GGCGGTGCTCGGCTGAGTCA
ABCA2_+_139922290.23-P1P2	h3_supp5	ABCA2	P1P2	GCCCGCGTCCGCTGACATCG
ABCA2_+_139922669.23-P1P2	h3_top5	ABCA2	P1P2	GCCgcgcgggcgatgcccag
ABCA2_-_139922262.23-P1P2	h3_supp5	ABCA2	P1P2	GCCCAGCGAGCGCGCTGCAG
ABCA2_-_139922304.23-P1P2	h3_supp5	ABCA2	P1P2	GCCGAGCACCGCGATGTCAG
ABCA2_-_139922347.23-P1P2	h3_supp5	ABCA2	P1P2	GGACCGAGCCACCTCCCCGG
ABCA2_-_139922596.23-P1P2	h3_top5	ABCA2	P1P2	GTGGTGCAGGAAGCCCATGG
ABCA3_+_2390336.23-P1P2	h2_top5	ABCA3	P1P2	GGGTGCCGCTCCCTCAGCGT
ABCA3_+_2390611.23-P1P2	h2_top5	ABCA3	P1P2	GGGGAGGGGACCCCGCGAGA
ABCA3_+_2390721.23-P1P2	h2_supp5	ABCA3	P1P2	GCCGCTGCGTCCGCCAGTAG
ABCA3_-_2390323.23-P1P2	h2_top5	ABCA3	P1P2	GGCAGTGCGGGACACGCCCA
ABCA3_-_2390333.23-P1P2	h2_top5	ABCA3	P1P2	GACACGCCCAAGGCTCGGAT
ABCA3_-_2390500.23-P1P2	h2_supp5	ABCA3	P1P2	Gcgagctggccggcgagggt
ABCA3_-_2390670.23-P1P2	h2_supp5	ABCA3	P1P2	GCGCTCCAGCCTCGCAGTGG
ABCA3_-_2390673.23-P1P2	h2_supp5	ABCA3	P1P2	GTCCAGCCTCGCAGTGGCGG
ABCA3_-_2390704.23-P1P2	h2_top5	ABCA3	P1P2	GCTGCGTGGCCGCCCTGGAG
ABCA3_-_2390733.23-P1P2	h2_supp5	ABCA3	P1P2	GGCCTGCAACCCGCTACTGG
ABCA4_+_94586620.23-P1P2	h2_supp5	ABCA4	P1P2	GGCCTCAGCTCTGACCAATC
ABCA4_+_94586668.23-P1P2	h2_top5	ABCA4	P1P2	GGAGCCAGAGGCGCTCTTAA
ABCA4_+_94586689.23-P1P2	h2_supp5	ABCA4	P1P2	GAGGAGAAGGACACAGCGTC
ABCA4_-_94586219.23-P1P2	h2_top5	ABCA4	P1P2	GGCGTGGATGCCCTAGAGAG
ABCA4_-_94586232.23-P1P2	h2_top5	ABCA4	P1P2	GAGAGAGCGGTAGACTGGAC
ABCA4_-_94586250.23-P1P2	h2_top5	ABCA4	P1P2	GCAGGCAGGTGTAAAACGGG
ABCA4_-_94586284.23-P1P2	h2_supp5	ABCA4	P1P2	GGGGCAGGCAATGGATTGAC
ABCA4_-_94586293.23-P1P2	h2_supp5	ABCA4	P1P2	GATGGATTGACAGGCACGGT
ABCA4_-_94586628.23-P1P2	h2_supp5	ABCA4	P1P2	GGACCACACGAAGACCAGAT
ABCA4_-_94586658.23-P1P2	h2_top5	ABCA4	P1P2	GGAGGCCCCTCAGACAGCAA
ABCA5_+_67322884.23-P1P2	h2_supp5	ABCA5	P1P2	GGGCTCCGCGAGGCTCCCCT
ABCA5_+_67323191.23-P1P2	h2_supp5	ABCA5	P1P2	GCTCTGCGGCTCGGGCCCTG
ABCA5_+_67323221.23-P1P2	h2_supp5	ABCA5	P1P2	GCAACAGACTGAGCGCGTCC
ABCA5_-_67322845.23-P1P2	h2_supp5	ABCA5	P1P2	GGGGTGGAACGACAGCGTCC
ABCA5_-_67322851.23-P1P2	h2_top5	ABCA5	P1P2	GAACGACAGCGTCCAGGCAA
ABCA5_-_67322872.23-P1P2	h2_top5	ABCA5	P1P2	GGCAGTGTCCCGAAGTCCCA
ABCA5_-_67322891.23-P1P2	h2_top5	ABCA5	P1P2	GCGGCCGGACCCGGTCCCAG
ABCA5_-_67323220.23-P1P2	h2_top5	ABCA5	P1P2	GCCCGAGCCGCAGAGCTGTC
ABCA5_-_67323267.23-P1P2	h2_supp5	ABCA5	P1P2	GCAGTGCGGGTGACCCAGCT
ABCA5_-_67323280.23-P1P2	h2_top5	ABCA5	P1P2	GCCAGCTGGGATCTGTGCGA
ABCA6_+_67137671.23-P1P2	h2_supp5	ABCA6	P1P2	GTTTGCTTCTGTGCTAGCTG
ABCA6_+_67137842.23-P1P2	h2_top5	ABCA6	P1P2	GTGTGCTGTGCCAAATATGT
ABCA6_+_67138008.23-P1P2	h2_top5	ABCA6	P1P2	GCAGGCTGTGTAAGAGCTGC
ABCA6_+_67138026.23-P1P2	h2_top5	ABCA6	P1P2	GACACCCCTTTTCAGAAACC
ABCA6_+_67138050.23-P1P2	h2_top5	ABCA6	P1P2	GCATCATGTACAGCTTGGTC
ABCA6_+_67138055.23-P1P2	h2_supp5	ABCA6	P1P2	GAAGTTCATCATGTACAGCT
ABCA6_-_67137744.23-P1P2	h2_supp5	ABCA6	P1P2	GCAATCTACACAATAAAAAG
ABCA6_-_67137748.23-P1P2	h2_supp5	ABCA6	P1P2	GCTACACAATAAAAAGTGGT
ABCA6_-_67137854.23-P1P2	h2_top5	ABCA6	P1P2	GCAGTGTCCACCCACATATT
ABCA6_-_67137948.23-P1P2	h2_supp5	ABCA6	P1P2	GACCAGTTCTCTGTTTGTCT
ABCA7_+_1040413.23-P1	h2_top5	ABCA7	P1	GGGAGTGCAGGAGTTCTAAC
ABCA7_+_1040474.23-P1	h2_supp5	ABCA7	P1	GAGCGGGACTTAGGATCTGG
ABCA7_+_1040513.23-P1	h2_top5	ABCA7	P1	Ggacccagacccttacgcca
ABCA7_+_1040541.23-P1	h2_supp5	ABCA7	P1	Gaggtgaccaggccggaact
ABCA7_+_1040560.23-P1	h2_supp5	ABCA7	P1	Gaggggcaggaagttgctaa
ABCA7_+_1040577.23-P1	h2_top5	ABCA7	P1	Ggaatctgacgctgacagag
ABCA7_+_1041292.23-P2	h2_top5	ABCA7	P2	GGGGCTGAAGACGTGCGGTG
ABCA7_+_1041297.23-P2	h2_top5	ABCA7	P2	GCGGTCGGGCTGAAGACGTG
ABCA7_+_1041311.23-P2	h2_top5	ABCA7	P2	GAGAGGTCAGGACAACGGTC
ABCA7_+_1041348.23-P2	h2_supp5	ABCA7	P2	GAGAAGGCCATGGTGAGACT
ABCA7_+_1041432.23-P2	h2_supp5	ABCA7	P2	GCGGCCCTGGTCTCACACTG
ABCA7_+_1041489.23-P2	h2_supp5	ABCA7	P2	GGACCTGGGGGAGAATAGGT
ABCA7_+_1041673.23-P2	h2_supp5	ABCA7	P2	GGGCTCCCTGACATGCACGG
ABCA7_-_1040133.23-P1	h2_top5	ABCA7	P1	GGCGCACTTGGCTTAAGGGG
ABCA7_-_1040209.23-P1	h2_top5	ABCA7	P1	GCTGGAAGGTGAGAAGGACT
ABCA7_-_1040214.23-P1	h2_supp5	ABCA7	P1	GAGGTGAGAAGGACTCGGAG
ABCA7_-_1040526.23-P1	h2_supp5	ABCA7	P1	Gggaaagaaccctggcgtaa
ABCA7_-_1041459.23-P2	h2_top5	ABCA7	P2	GTGTGAGACCAGGGCCGGGT
ABCA7_-_1041690.23-P2	h2_supp5	ABCA7	P2	GGAATCCCCCGTGCATGTCA
ABCA7_-_1041717.23-P2	h2_top5	ABCA7	P2	GTCACCAGGCCGCCAATACA
ABCA8_+_66950951.23-P1P2	h4_supp5	ABCA8	P1P2	GACAATAATGTAGGGCATTT
ABCA8_+_66950959.23-P1P2	h4_top5	ABCA8	P1P2	GTTGATTGCACAATAATGTA
ABCA8_+_66951172.23-P1P2	h4_supp5	ABCA8	P1P2	GACTTTAAAGATTTTATATC
ABCA8_+_66951401.23-P1P2	h4_top5	ABCA8	P1P2	GTTCTAAACAAGGAGCTCAG
ABCA8_-_66951365.23-P1P2	h4_supp5	ABCA8	P1P2	GATACAGTGAACTTACTTCT
ABCA8_-_66951372.23-P1P2	h4_top5	ABCA8	P1P2	GGAACTTACTTCTGGGAAAA
ABCA8_-_66951390.23-P1P2	h4_supp5	ABCA8	P1P2	GATGGAAGCAAGGAATCTAG
ABCA8_-_66951447.23-P1P2	h4_supp5	ABCA8	P1P2	GAGTTATTCATATTTTCTCC
ABCA8_-_66951525.23-P1P2	h4_top5	ABCA8	P1P2	GGTGAAGACTGCTTTCAGAG
ABCA8_-_66951528.23-P1P2	h4_top5	ABCA8	P1P2	GAAGACTGCTTTCAGAGTGG
ABCA9_+_67056924.23-P1P2	h2_supp5	ABCA9	P1P2	GATAGGCATGCCAGACGTTT
ABCA9_+_67056982.23-P1P2	h2_supp5	ABCA9	P1P2	GAAGTTAACCTCTAAAATTG
ABCA9_+_67057085.23-P1P2	h2_top5	ABCA9	P1P2	GGATGTAGTAGTGACCCAAA
ABCA9_-_67056649.23-P1P2	h2_top5	ABCA9	P1P2	GGCAATGCTTACAATTCCTC
ABCA9_-_67056810.23-P1P2	h2_supp5	ABCA9	P1P2	GCAAAAATGTTTTAGTTACG
ABCA9_-_67056917.23-P1P2	h2_supp5	ABCA9	P1P2	GAATAACTTACTGCTTTTAA
ABCA9_-_67056936.23-P1P2	h2_supp5	ABCA9	P1P2	GTGGTTTCTACCTAAACGTC
ABCA9_-_67057012.23-P1P2	h2_top5	ABCA9	P1P2	GTAGAGGTTAACTTACTCTC
ABCA9_-_67057053.23-P1P2	h2_top5	ABCA9	P1P2	GAGAAACACAGTTCATCCAT
ABCA9_-_67057069.23-P1P2	h2_top5	ABCA9	P1P2	GCATGGGTCTCTGCATGTTC
ABCB10_+_229694012.23-P1P2	h2_supp5	ABCB10	P1P2	GCGCAGCCGCTGCCTGGGCA
ABCB10_+_229694285.23-P1P2	h2_top5	ABCB10	P1P2	GCGCGGCCAGCCGCGTTCCC
ABCB10_+_229694391.23-P1P2	h2_supp5	ABCB10	P1P2	GTCGCACGCAGCGCCATGCG
ABCB10_+_229694413.23-P1P2	h2_top5	ABCB10	P1P2	GCCGGCGGGCTGAGGCGTAC
ABCB10_-_229694283.23-P1P2	h2_supp5	ABCB10	P1P2	GAGGCCAGTGAACGGCGATA
ABCB10_-_229694290.23-P1P2	h2_supp5	ABCB10	P1P2	GTGAACGGCGATAGGGACCC
ABCB10_-_229694297.23-P1P2	h2_top5	ABCB10	P1P2	GCGATAGGGACCCGGGAACG
ABCB10_-_229694400.23-P1P2	h2_supp5	ABCB10	P1P2	GCAGGCAGGGGGGCCTCGCA
ABCB10_-_229694457.23-P1P2	h2_top5	ABCB10	P1P2	GCAGGCGCGCGCAAAGCCCG
ABCB10_-_229694467.23-P1P2	h2_top5	ABCB10	P1P2	GCAAAGCCCGAGGACCCTCC
ABCB11_+_169887409.23-P1P2	h2_top5	ABCB11	P1P2	GTCAAAGTAAAAATACCAGT
ABCB11_+_169887589.23-P1P2	h2_supp5	ABCB11	P1P2	GTACTTGGATAGAAACTTAC
ABCB11_+_169887604.23-P1P2	h2_supp5	ABCB11	P1P2	GTAAACAACGCTACAATACT
ABCB11_+_169887776.23-P1P2	h2_supp5	ABCB11	P1P2	GACCTTTTAACTCTCCACAG
ABCB11_+_169887811.23-P1P2	h2_top5	ABCB11	P1P2	GGAATGATGAAAACCGAGGT
ABCB11_+_169887815.23-P1P2	h2_supp5	ABCB11	P1P2	GTTTAGAATGATGAAAACCG
ABCB11_-_169887416.23-P1P2	h2_top5	ABCB11	P1P2	GAGTTAAAAAAGAAGCCCAC
ABCB11_-_169887692.23-P1P2	h2_supp5	ABCB11	P1P2	GCCACAAAGTAAGAGTTAAA
ABCB11_-_169887784.23-P1P2	h2_top5	ABCB11	P1P2	GGAAATAATGGACTCCACTG
ABCB11_-_169887796.23-P1P2	h2_top5	ABCB11	P1P2	GTCCACTGTGGAGAGTTAAA
ABCB1_+_87342475.23-ENST00000265724.3	h2_supp5	ABCB1	ENST00000265724.3	GCAGGAAGCAACCAGATAAA
ABCB1_+_87342641.23-ENST00000265724.3	h2_supp5	ABCB1	ENST00000265724.3	GTAGCTCCTCCTCTGGTACT
ABCB1_-_87342245.23-ENST00000265724.3	h2_supp5	ABCB1	ENST00000265724.3	GGCTTTGGAACTCTTAAGAA
ABCB1_-_87342256.23-ENST00000265724.3	h2_top5	ABCB1	ENST00000265724.3	GCTTAAGAAAGGAAGTAAGT
ABCB1_-_87342302.23-ENST00000265724.3	h2_top5	ABCB1	ENST00000265724.3	GAGAAGTTAACTAAAAAATG
ABCB1_-_87342654.23-ENST00000265724.3	h2_top5	ABCB1	ENST00000265724.3	GGTGTTTATCCCAGTACCAG
ABCB1_-_87342657.23-ENST00000265724.3	h2_top5	ABCB1	ENST00000265724.3	GTTTATCCCAGTACCAGAGG
ABCB1_-_87342674.23-ENST00000265724.3	h2_top5	ABCB1	ENST00000265724.3	GGGAGGAGCTACATGAACTA
ABCB1_-_87342678.23-ENST00000265724.3	h2_supp5	ABCB1	ENST00000265724.3	GGAGCTACATGAACTAAGGC
ABCB1_-_87342682.23-ENST00000265724.3	h2_supp5	ABCB1	ENST00000265724.3	GTACATGAACTAAGGCAGGC
ABCB4_+_87104635.23-P1P2	h4_supp5	ABCB4	P1P2	GGCAGGACTAAGTTCACCCT
ABCB4_+_87104755.23-P1P2	h4_supp5	ABCB4	P1P2	GATCTTGAGGCGGCAAAGAA
ABCB4_+_87104897.23-P1P2	h4_supp5	ABCB4	P1P2	GAAGGGAGACCCGGGACGTG
ABCB4_+_87104933.23-P1P2	h4_top5	ABCB4	P1P2	GTTCGAGGTGAGAGAGGTCC
ABCB4_+_87104939.23-P1P2	h4_top5	ABCB4	P1P2	GGCGAGGTTCGAGGTGAGAG
ABCB4_+_87104948.23-P1P2	h4_supp5	ABCB4	P1P2	GCAGACACGCGCGAGGTTCG
ABCB4_+_87105008.23-P1P2	h4_top5	ABCB4	P1P2	GgCCGCGGCGAGCAAAGTCC
ABCB4_-_87104608.23-P1P2	h4_top5	ABCB4	P1P2	GCCAAAACAAAGGTCTTCAA
ABCB4_-_87104975.23-P1P2	h4_top5	ABCB4	P1P2	GACCTCGCGCGTGTCTGGCA
ABCB4_-_87104991.23-P1P2	h4_supp5	ABCB4	P1P2	GGCAGGGCCTCTGGACGCGC
ABCB5_+_20687051.23-P1P2	h6_top5	ABCB5	P1P2	GGCTCACAGAGAGATATTAG
ABCB5_+_20687204.23-P1P2	h6_supp5	ABCB5	P1P2	GTGCGAAGGTTTCAAAGTGA
ABCB5_+_20687218.23-P1P2	h6_top5	ABCB5	P1P2	GGCTCCTCGGGCTATTGCGA
ABCB5_+_20687242.23-P1P2	h6_top5	ABCB5	P1P2	GATAACCTGGAAAATATGAA
ABCB5_+_20687409.23-P1P2	h6_top5	ABCB5	P1P2	GCCTCTTAGAAAAGAATTAA
ABCB5_+_20687450.23-P1P2	h6_supp5	ABCB5	P1P2	GTGCATTGAGTTAGACATGA
ABCB5_-_20687157.23-P1P2	h6_supp5	ABCB5	P1P2	GTCACTTTGTTTGTTCCTGT
ABCB5_-_20687194.23-P1P2	h6_supp5	ABCB5	P1P2	GTCCATAGCAGTTATTGCAT
ABCB5_-_20687236.23-P1P2	h6_supp5	ABCB5	P1P2	GAAACCTTCGCAATAGCCCG
ABCB5_-_20687396.23-P1P2	h6_top5	ABCB5	P1P2	GATGTTGGCCAGTTGTTTAT
ABCB6_+_220083287.23-P1P2	h3_supp5	ABCB6	P1P2	GCACGCTCGTGCCCTCGACG
ABCB6_+_220083500.23-P1P2	h3_top5	ABCB6	P1P2	GCCCGCAGCTTGGCGCCCAG
ABCB6_+_220083584.23-P1P2	h3_supp5	ABCB6	P1P2	GGCCCTGCGTGAGTGCGTGG
ABCB6_+_220083613.23-P1P2	h3_supp5	ABCB6	P1P2	GCAGCGGGGCCGTGCTGAGA
ABCB6_+_220083669.23-P1P2	h3_supp5	ABCB6	P1P2	GCAACACCGAGCATTCCCGT
ABCB6_-_220083181.23-P1P2	h3_top5	ABCB6	P1P2	GGAAGCAGCTGCAGCACGTA
ABCB6_-_220083194.23-P1P2	h3_top5	ABCB6	P1P2	GCACGTAGGGAGAGATGCGA
ABCB6_-_220083298.23-P1P2	h3_supp5	ABCB6	P1P2	GCCAGAGCCATCCGCGTCGA
ABCB6_-_220083468.23-P1P2	h3_top5	ABCB6	P1P2	GGGACTGGTCACTCGGAGAG
ABCB6_-_220083604.23-P1P2	h3_top5	ABCB6	P1P2	GGCCGCCACGCACTCACGCA
ABCB7_+_74375695.23-P1P2	h3_supp5	ABCB7	P1P2	GAGGACACCTGGAGCGCTGG
ABCB7_+_74375720.23-P1P2	h3_supp5	ABCB7	P1P2	GAAACGGGGCAGGAGGTTCT
ABCB7_+_74375885.23-P1P2	h3_top5	ABCB7	P1P2	GAAGGGCAAGGGGACCTGTA
ABCB7_+_74375896.23-P1P2	h3_supp5	ABCB7	P1P2	GAGAATAGGGTGAAGGGCAA
ABCB7_+_74376070.23-P1P2	h3_top5	ABCB7	P1P2	GATGCATTCTTGGCGCTGGG
ABCB7_-_74375871.23-P1P2	h3_supp5	ABCB7	P1P2	GCTCTCTCTGCCCCGAGGTC
ABCB7_-_74375964.23-P1P2	h3_top5	ABCB7	P1P2	GTAGGCTCGAGCGGTTCCCA
ABCB7_-_74376019.23-P1P2	h3_top5	ABCB7	P1P2	GAGCCGCTAACAGAGACTAA
ABCB7_-_74376036.23-P1P2	h3_supp5	ABCB7	P1P2	GAAAGGCCGGATCAGAATCG
ABCB7_-_74376044.23-P1P2	h3_top5	ABCB7	P1P2	GGATCAGAATCGCGGAGTGC
ABCB8_+_150725531.23-P1P2	h2_supp5	ABCB8	P1P2	GCCCACTGAGGGCTCTATGT
ABCB8_+_150725592.23-P1P2	h2_supp5	ABCB8	P1P2	GATGCACCAGCATGCTGACG
ABCB8_+_150725958.23-P1P2	h2_supp5	ABCB8	P1P2	GGGACCCCCGGTCGGGAGTG
ABCB8_+_150725965.23-P1P2	h2_top5	ABCB8	P1P2	GGGAAAGGGGACCCCCGGTC
ABCB8_-_150725551.23-P1P2	h2_top5	ABCB8	P1P2	GGCCAACATAGAGCCCTCAG
ABCB8_-_150725580.23-P1P2	h2_top5	ABCB8	P1P2	GGTGAAACTGCTATTGCCGG
ABCB8_-_150725890.23-P1P2	h2_supp5	ABCB8	P1P2	GCACTCCAGTCGCCAGCAGG
ABCB8_-_150725928.23-P1P2	h2_top5	ABCB8	P1P2	GCGCGTGTCAGCCAGAAGGA
ABCB8_-_150725938.23-P1P2	h2_supp5	ABCB8	P1P2	GCCAGAAGGAGGGGACGCTC
ABCB8_-_150725975.23-P1P2	h2_top5	ABCB8	P1P2	GCAGTCCGCACTCCCGACCG
ABCB9_+_123450501.23-P1	h3_supp5	ABCB9	P1	GGGGCTGGCGCGCCTTCTGA
ABCB9_+_123450542.23-P1	h3_supp5	ABCB9	P1	GGTGTTGGAGGATCCTGGGA
ABCB9_+_123450546.23-P1	h3_top5	ABCB9	P1	GGGAGGTGTTGGAGGATCCT
ABCB9_+_123450566.23-P1	h3_top5	ABCB9	P1	GGCTGCCTCTTGGAAAATGT
ABCB9_+_123450826.23-P1	h3_top5	ABCB9	P1	GGGTGCCAGGTAACAGGTAA
ABCB9_+_123450970.23-P1	h3_top5	ABCB9	P1	GGCAGCGGCGCAGCGCGGGT
ABCB9_+_123465380.23-P2	h3_supp5	ABCB9	P2	GCCGCCGCGAGTGGCGTCTG
ABCB9_+_123465415.23-P2	h3_supp5	ABCB9	P2	GCACCCGGCTCCAAACCCCT
ABCB9_+_123465727.23-P2	h3_top5	ABCB9	P2	GCGACCCCCGTCCCCGGGAC
ABCB9_+_123465780.23-P2	h3_supp5	ABCB9	P2	GGAGGCCGAGCAGTTCCTCG
ABCB9_-_123450530.23-P1	h3_supp5	ABCB9	P1	GAGGCGCGCCAGCCCCGTCC
ABCB9_-_123450533.23-P1	h3_supp5	ABCB9	P1	GCGCGCCAGCCCCGTCCTGG
ABCB9_-_123450551.23-P1	h3_supp5	ABCB9	P1	GGGGGAACGACAGCCATCCC
ABCB9_-_123450999.23-P1	h3_top5	ABCB9	P1	GCGCTGCGCCGCTGCAAGGT
ABCB9_-_123465296.23-P2	h3_supp5	ABCB9	P2	GCCCGCAGGGCGGTCGAGGT
ABCB9_-_123465398.23-P2	h3_supp5	ABCB9	P2	GGCGCCCCAGACGCCACTCG
ABCB9_-_123465422.23-P2	h3_top5	ABCB9	P2	GGACGGCGGCCAGTTCCCAG
ABCB9_-_123465699.23-P2	h3_top5	ABCB9	P2	GGCGGCGCCATGGCTCACGT
ABCB9_-_123465738.23-P2	h3_top5	ABCB9	P2	GGGAGTCGCAGCCGGTCCCG
ABCB9_-_123465787.23-P2	h3_top5	ABCB9	P2	GGAGCAGGAAAGACACCTCG
ABCC10_+_43395315.23-P1P2	h6_top5	ABCC10	P1P2	GTGGCACCCCACCTAGAGGT
ABCC10_+_43395533.23-P1P2	h6_supp5	ABCC10	P1P2	GTACCAAGGGTAAAAACGGG
ABCC10_+_43395536.23-P1P2	h6_supp5	ABCC10	P1P2	GCGGTACCAAGGGTAAAAAC
ABCC10_+_43395660.23-P1P2	h6_supp5	ABCC10	P1P2	GGGCTGTGCAGGGTAACAGC
ABCC10_-_43395326.23-P1P2	h6_supp5	ABCC10	P1P2	GGCTAGGTCTTCCAACCTCT
ABCC10_-_43395330.23-P1P2	h6_top5	ABCC10	P1P2	GGGTCTTCCAACCTCTAGGT
ABCC10_-_43395343.23-P1P2	h6_top5	ABCC10	P1P2	GCTAGGTGGGGTGCCAGCCG
ABCC10_-_43395719.23-P1P2	h6_supp5	ABCC10	P1P2	GCCTTCAGGTGAGGCGTCCA
ABCC10_-_43395891.23-P1P2	h6_top5	ABCC10	P1P2	GCCCCGAGGTGGGTAGAGAC
ABCC10_-_43395984.23-P1P2	h6_top5	ABCC10	P1P2	Gtagcgaggtctctggagta
ABCC11_+_48277846.23-P1	h6_supp5	ABCC11	P1	Gtgcaatggcgcgataccca
ABCC11_+_48278091.23-P1	h6_supp5	ABCC11	P1	GCTTGAGCGTCCTACCTATG
ABCC11_+_48278130.23-P1	h6_top5	ABCC11	P1	GTGGCTTCGCGCTGCTCTCT
ABCC11_+_48278163.23-P1	h6_supp5	ABCC11	P1	GCGCGCTACGGTCCGTCCCC
ABCC11_+_48281001.23-P2	h6_top5	ABCC11	P2	GTACTTCTAGGATAACTAGA
ABCC11_+_48281042.23-P2	h6_top5	ABCC11	P2	GTGGTACAATCTTTCCACAT
ABCC11_+_48281160.23-P2	h6_supp5	ABCC11	P2	GGCTATGGATTACTCAGTAT
ABCC11_+_48281175.23-P2	h6_supp5	ABCC11	P2	GTGGAAACAGGCTAATGCTA
ABCC11_+_48281194.23-P2	h6_supp5	ABCC11	P2	GGGAAGGACAGACTTGTGCG
ABCC11_+_48281284.23-P2	h6_supp5	ABCC11	P2	GCGTCACCTGGATAGCGCAA
ABCC11_+_48281345.23-P2	h6_top5	ABCC11	P2	GTCTGTGTGGCAAAGAACGC
ABCC11_+_48281428.23-P2	h6_top5	ABCC11	P2	GGCACACTAACGTGCAGAAA
ABCC11_-_48277852.23-P1	h6_top5	ABCC11	P1	Gggcagaggctgcaagccgt
ABCC11_-_48278103.23-P1	h6_top5	ABCC11	P1	GCACGTCTTTCCGCATAGGT
ABCC11_-_48278122.23-P1	h6_top5	ABCC11	P1	GAGGACGCTCAAGTCTTACC
ABCC11_-_48278125.23-P1	h6_top5	ABCC11	P1	GACGCTCAAGTCTTACCGGG
ABCC11_-_48278197.23-P1	h6_supp5	ABCC11	P1	GCGTAGCGCGTAGCCGGAAG
ABCC11_-_48278200.23-P1	h6_supp5	ABCC11	P1	GAGCGCGTAGCCGGAAGCGG
ABCC11_-_48280980.23-P2	h6_top5	ABCC11	P2	GAAAAGTCTTCATAGAAGTC
ABCC11_-_48281374.23-P2	h6_supp5	ABCC11	P2	GCTTTGCCACACAGAGTGGC
ABCC12_+_48180281.23-ENST00000311303.3	h4_supp5	ABCC12	ENST00000311303.3	GTCTGGACCAGCGAGGCCGG
ABCC12_+_48180331.23-ENST00000311303.3	h4_supp5	ABCC12	ENST00000311303.3	GCTCCAGGCTGCCATCAGGA
ABCC12_+_48180353.23-ENST00000311303.3	h4_supp5	ABCC12	ENST00000311303.3	GTCCCCAGGCCAAAAGCCCA
ABCC12_+_48180599.23-ENST00000311303.3	h4_supp5	ABCC12	ENST00000311303.3	GCAACCCAACATGAGAAAAG
ABCC12_+_48180636.23-ENST00000311303.3	h4_top5	ABCC12	ENST00000311303.3	GCAACCAAAACCACACCATA
ABCC12_-_48180314.23-ENST00000311303.3	h4_top5	ABCC12	ENST00000311303.3	GCTGGTCCAGATCTGAGATA
ABCC12_-_48180571.23-ENST00000311303.3	h4_supp5	ABCC12	ENST00000311303.3	GGTCCCTTAATGCTACGCTG
ABCC12_-_48180643.23-ENST00000311303.3	h4_top5	ABCC12	ENST00000311303.3	GCCAAGAGCAGAAAACCCTA
ABCC12_-_48180648.23-ENST00000311303.3	h4_top5	ABCC12	ENST00000311303.3	GAGCAGAAAACCCTATGGTG
ABCC12_-_48180679.23-ENST00000311303.3	h4_top5	ABCC12	ENST00000311303.3	GGGAGCCGGTCCAATGACCA
ABCC1_+_16043482.23-P1P2	h2_top5	ABCC1	P1P2	GCTGGCGCTAGCGCTggcgg
ABCC1_+_16043647.23-P1P2	h2_supp5	ABCC1	P1P2	GCCCCGGCACGTACCCAGAG
ABCC1_+_16043887.23-P1P2	h2_supp5	ABCC1	P1P2	GCCGACCCTCCAAAACCCCA
ABCC1_+_16043921.23-P1P2	h2_top5	ABCC1	P1P2	GCAGGAAGGCCTCCTCACGG
ABCC1_+_16043939.23-P1P2	h2_supp5	ABCC1	P1P2	GCAGACGGGAACCCCAAAAC
ABCC1_-_16043841.23-P1P2	h2_supp5	ABCC1	P1P2	GCAAGGCATGGGGGAAACTT
ABCC1_-_16043871.23-P1P2	h2_top5	ABCC1	P1P2	GTTCCTGCGGAGCAGAGCGT
ABCC1_-_16043934.23-P1P2	h2_top5	ABCC1	P1P2	GGGTCAGAGCCGCCGTGAGG
ABCC1_-_16043999.23-P1P2	h2_supp5	ABCC1	P1P2	GGGAAGGGGACGCTAGAGAT
ABCC1_-_16044002.23-P1P2	h2_top5	ABCC1	P1P2	GAGGGGACGCTAGAGATGGG
ABCC2_+_101542376.23-P1P2	h1_supp5	ABCC2	P1P2	GCTAAAAAGCCCTAGGGACA
ABCC2_+_101542515.23-P1P2	h1_top5	ABCC2	P1P2	GCTTGTTTCATCAAAGAAAG
ABCC2_+_101542910.23-P1P2	h1_top5	ABCC2	P1P2	GTCACACGGATTAAATTGGA
ABCC2_+_101542914.23-P1P2	h1_top5	ABCC2	P1P2	GTTCCTCACACGGATTAAAT
ABCC2_+_101542981.23-P1P2	h1_top5	ABCC2	P1P2	GTCTCAGCAAGACTCAGTCA
ABCC2_-_101542463.23-P1P2	h1_supp5	ABCC2	P1P2	GGGTTAACGATTAAATGGTT
ABCC2_-_101542705.23-P1P2	h1_supp5	ABCC2	P1P2	GGTGGTAGTTAGTTAACTTA
ABCC2_-_101542708.23-P1P2	h1_supp5	ABCC2	P1P2	GGTAGTTAGTTAACTTAGGG
ABCC2_-_101542808.23-P1P2	h1_top5	ABCC2	P1P2	GCTCCAGAGGATATAAGATC
ABCC2_-_101542903.23-P1P2	h1_supp5	ABCC2	P1P2	GGCCTTCTCTAAAGAGAAAC
ABCC3_+_48712245.23-P1P2	h2_supp5	ABCC3	P1P2	GGCGCGGTCGGACCCAGCGG
ABCC3_+_48712248.23-P1P2	h2_top5	ABCC3	P1P2	GCGAGCGCGGTCGGACCCAG
ABCC3_+_48712270.23-P1P2	h2_top5	ABCC3	P1P2	GCGAGGCGCGGCTGCAAGGA
ABCC3_+_48712294.23-P1P2	h2_supp5	ABCC3	P1P2	GAACCGCACAGGGCGTCCAT
ABCC3_+_48712450.23-P1P2	h2_top5	ABCC3	P1P2	GGGCGCCCAGGCCGTCTCAG
ABCC3_+_48712559.23-P1P2	h2_top5	ABCC3	P1P2	GCCAGTGCTGCAGCCGGGAA
ABCC3_+_48712662.23-P1P2	h2_top5	ABCC3	P1P2	GCCTTCCGCACCCGACGGAG
ABCC3_+_48712738.23-P1P2	h2_supp5	ABCC3	P1P2	GGCAACCGAGTCCTAACCTG
ABCC3_-_48712163.23-P1P2	h2_supp5	ABCC3	P1P2	GGCAGGGAGACCGGACCCAG
ABCC3_-_48712673.23-P1P2	h2_supp5	ABCC3	P1P2	GTCCATCCCAGCCCCTCCGT
ABCC4_+_95953430.23-P1P2	h2_top5	ABCC4	P1P2	GCGCCGCGGACGCACTCTCC
ABCC4_+_95953641.23-P1P2	h2_top5	ABCC4	P1P2	GGCCCCAGCATCCCTGCTTG
ABCC4_+_95953668.23-P1P2	h2_top5	ABCC4	P1P2	GGCCGAGCGGACAGGCGTGG
ABCC4_+_95953676.23-P1P2	h2_supp5	ABCC4	P1P2	GAGGCTCCAGCCGAGCGGAC
ABCC4_+_95953681.23-P1P2	h2_supp5	ABCC4	P1P2	GTTCACAGGCTCCAGCCGAG
ABCC4_+_95953695.23-P1P2	h2_supp5	ABCC4	P1P2	GCCGGAAGCGGCTGCTTCAC
ABCC4_-_95953458.23-P1P2	h2_supp5	ABCC4	P1P2	GAGTGCGTCCGCGGCGCCAG
ABCC4_-_95953561.23-P1P2	h2_supp5	ABCC4	P1P2	GGCTTCACCTCCTGGTACAC
ABCC4_-_95953614.23-P1P2	h2_top5	ABCC4	P1P2	GcggggTCGCGCTGATCAGG
ABCC4_-_95953652.23-P1P2	h2_top5	ABCC4	P1P2	GCGCTCCTGGACCTCAAGCA
ABCC5_+_183735202.23-P1P2	h3_supp5	ABCC5	P1P2	GAGAGAAACGCCCACCTGGG
ABCC5_+_183735246.23-P1P2	h3_supp5	ABCC5	P1P2	GTGGGAACGCCCTAGGGCCC
ABCC5_+_183735252.23-P1P2	h3_supp5	ABCC5	P1P2	GGGGCTGTGGGAACGCCCTA
ABCC5_+_183735285.23-P1P2	h3_supp5	ABCC5	P1P2	GGTGTGGGTCGCGCTCGCCT
ABCC5_+_183735648.23-P1P2	h3_top5	ABCC5	P1P2	GGCTCGGGAGCGTGGTTGAG
ABCC5_+_183735692.23-P1P2	h3_top5	ABCC5	P1P2	GGCGGCCGATGCCGCTATAA
ABCC5_-_183735259.23-P1P2	h3_top5	ABCC5	P1P2	GCTGGGATGCCCGGGCCCTA
ABCC5_-_183735312.23-P1P2	h3_top5	ABCC5	P1P2	GCGAGCGCGACCCACACCCA
ABCC5_-_183735467.23-P1P2	h3_top5	ABCC5	P1P2	GGGCGGCGGCAGGAGACCAG
ABCC5_-_183735588.23-P1P2	h3_supp5	ABCC5	P1P2	GCCGTGACAACCGAGCTGGA
ABCC6_+_16316894.23-ENST00000205557.7	h6_supp5	ABCC6	ENST00000205557.7	GAGTGGAGTTCATGGAGTGG
ABCC6_+_16316916.23-ENST00000205557.7	h6_top5	ABCC6	ENST00000205557.7	GCTCTTAGCAAAGGACTCCA
ABCC6_+_16317287.23-ENST00000205557.7	h6_top5	ABCC6	ENST00000205557.7	GCGACGACAGAAGGCGCCGA
ABCC6_+_16317296.23-ENST00000205557.7	h6_top5	ABCC6	ENST00000205557.7	GTGGGACCCACGACGACAGA
ABCC6_-_16316877.23-ENST00000205557.7	h6_supp5	ABCC6	ENST00000205557.7	GTCCCTGGCCCTCGAAATGC
ABCC6_-_16317049.23-ENST00000205557.7	h6_supp5	ABCC6	ENST00000205557.7	GCCCTAGTAGCTGGGAGGTC
ABCC6_-_16317052.23-ENST00000205557.7	h6_supp5	ABCC6	ENST00000205557.7	GTAGTAGCTGGGAGGTCTGG
ABCC6_-_16317235.23-ENST00000205557.7	h6_top5	ABCC6	ENST00000205557.7	GAGCCTGGAAAAGGAGAGTG
ABCC6_-_16317247.23-ENST00000205557.7	h6_top5	ABCC6	ENST00000205557.7	GGAGAGTGGGGCGCGATGGG
ABCC6_-_16317344.23-ENST00000205557.7	h6_supp5	ABCC6	ENST00000205557.7	GTGTCTGTCGCTAAGTCTCT
ABCC8_+_17497824.23-P1P2	h1_supp5	ABCC8	P1P2	GGGTCGGGCCTCACCCTCCG
ABCC8_+_17497953.23-P1P2	h1_top5	ABCC8	P1P2	GGATCCCGCGCCAAACACAG
ABCC8_+_17498249.23-P1P2	h1_supp5	ABCC8	P1P2	GACCAGGGGGTCCTCAACAA
ABCC8_+_17498387.23-P1P2	h1_top5	ABCC8	P1P2	Ggcggagctgcaagggacag
ABCC8_+_17498394.23-P1P2	h1_supp5	ABCC8	P1P2	Gccgggcggcggagctgcaa
ABCC8_-_17497979.23-P1P2	h1_top5	ABCC8	P1P2	GGTGTTTGGCGCGGGATCGG
ABCC8_-_17497997.23-P1P2	h1_top5	ABCC8	P1P2	GGGGGCACCGGGGGAGTGAA
ABCC8_-_17498066.23-P1P2	h1_supp5	ABCC8	P1P2	GGGGGACCCCGGGAACGAGG
ABCC8_-_17498220.23-P1P2	h1_top5	ABCC8	P1P2	GTGAAGAGTAGGAAGACGTG
ABCC8_-_17498282.23-P1P2	h1_supp5	ABCC8	P1P2	GACCCCCTGGTCCACCCGGT
ABCC9_+_22093672.23-P1P2	h1_top5	ABCC9	P1P2	GAGCTCAAGTGCACCGGCAG
ABCC9_+_22093678.23-P1P2	h1_top5	ABCC9	P1P2	GGAAGGTAGCTCAAGTGCAC
ABCC9_+_22093937.23-P1P2	h1_top5	ABCC9	P1P2	GGCTCGAGAAGTGAAGGGGT
ABCC9_+_22093941.23-P1P2	h1_top5	ABCC9	P1P2	GCCCGGCTCGAGAAGTGAAG
ABCC9_+_22094148.23-P1P2	h1_supp5	ABCC9	P1P2	GTGCGTGCTTCGCCTAGGGG
ABCC9_+_22094152.23-P1P2	h1_supp5	ABCC9	P1P2	GGCACTGCGTGCTTCGCCTA
ABCC9_+_22094309.23-P1P2	h1_top5	ABCC9	P1P2	GAGGTCTCCGGCCCCAGGCG
ABCC9_-_22093906.23-P1P2	h1_supp5	ABCC9	P1P2	GAGTTGATTTGAGTAGGAGA
ABCC9_-_22094032.23-P1P2	h1_supp5	ABCC9	P1P2	GGAAGTGCGAGAGAGTGCGA
ABCC9_-_22094122.23-P1P2	h1_supp5	ABCC9	P1P2	GGGCATTCATGTAAAAGACA
ABCD1_+_152990414.23-P1P2	h3_top5	ABCD1	P1P2	GGAGAGGTCTCGGGCAGAGG
ABCD1_+_152990694.23-P1P2	h3_supp5	ABCD1	P1P2	GCTGGGCTGGCTGCCGCGTA
ABCD1_+_152990711.23-P1P2	h3_top5	ABCD1	P1P2	GGAGCACCGGCATGTCACCT
ABCD1_-_152990333.23-P1P2	h3_supp5	ABCD1	P1P2	GTGTCGCTTCAGCCAGGCTG
ABCD1_-_152990338.23-P1P2	h3_top5	ABCD1	P1P2	GCTTCAGCCAGGCTGCGGAG
ABCD1_-_152990342.23-P1P2	h3_supp5	ABCD1	P1P2	GAGCCAGGCTGCGGAGCGGA
ABCD1_-_152990379.23-P1P2	h3_top5	ABCD1	P1P2	GCGGGGAGGGGCGCCACCgg
ABCD1_-_152990498.23-P1P2	h3_supp5	ABCD1	P1P2	GGAGCCAAGTTCCTCCACTT
ABCD1_-_152990703.23-P1P2	h3_top5	ABCD1	P1P2	GACCAGCCCCAGTCCCTACG
ABCD1_-_152990727.23-P1P2	h3_supp5	ABCD1	P1P2	GGCCAGCCCAGGTGACATGC
ABCD2_+_40013099.23-P1P2	h2_top5	ABCD2	P1P2	GTGTGACCACTGAAACAGGG
ABCD2_+_40013295.23-P1P2	h2_supp5	ABCD2	P1P2	GAAACCCTCTATCCCATCAT
ABCD2_+_40013504.23-P1P2	h2_supp5	ABCD2	P1P2	GGCAGACTATGGGACGCTGT
ABCD2_+_40013514.23-P1P2	h2_top5	ABCD2	P1P2	GGAGAAACGCTGCAGACTAT
ABCD2_+_40013594.23-P1P2	h2_top5	ABCD2	P1P2	GTCATTCCCGGTAGATGCAG
ABCD2_-_40013191.23-P1P2	h2_top5	ABCD2	P1P2	GCTGCATTCACTCCAGGCGA
ABCD2_-_40013313.23-P1P2	h2_supp5	ABCD2	P1P2	GTTGCCAATGATGGGATAGA
ABCD2_-_40013342.23-P1P2	h2_supp5	ABCD2	P1P2	GAGCATATGCCGCAGCCACC
ABCD2_-_40013373.23-P1P2	h2_supp5	ABCD2	P1P2	GCTCTTAGCAGCACTCGATC
ABCD2_-_40013610.23-P1P2	h2_top5	ABCD2	P1P2	GAGACTCCGCTGCATCTACC
ABCD3_+_94884002.23-P1P2	h4_top5	ABCD3	P1P2	GGTACCAGCGAGCCGGCGAG
ABCD3_+_94884009.23-P1P2	h4_top5	ABCD3	P1P2	GACTGCCGGTACCAGCGAGC
ABCD3_+_94884032.23-P1P2	h4_top5	ABCD3	P1P2	GTACTTGCTGAAGGCCGCCA
ABCD3_+_94884210.23-P1P2	h4_supp5	ABCD3	P1P2	GAGAGACCTGTCGGCCGGGT
ABCD3_+_94884219.23-P1P2	h4_supp5	ABCD3	P1P2	GGTCGGGCAAAGAGACCTGT
ABCD3_+_94884473.23-P1P2	h4_top5	ABCD3	P1P2	GCACAGAAGGGGGTGATGTA
ABCD3_-_94883974.23-P1P2	h4_top5	ABCD3	P1P2	GCCCCGCGCTGCGTGCAGTA
ABCD3_-_94884061.23-P1P2	h4_supp5	ABCD3	P1P2	GGCCTTCAGCAAGTACTTGA
ABCD3_-_94884365.23-P1P2	h4_supp5	ABCD3	P1P2	GGGCGACCTCGCTCCACCCC
ABCD3_-_94884436.23-P1P2	h4_supp5	ABCD3	P1P2	GCAGGCAGCGGCCTCCAGTT
ABCD4_+_74769232.23-P1P2	h2_supp5	ABCD4	P1P2	Gcaccctgtgggccaatgca
ABCD4_+_74769429.23-P1P2	h2_supp5	ABCD4	P1P2	GGAAAGAGGAGCTCTCGAAG
ABCD4_+_74769611.23-P1P2	h2_top5	ABCD4	P1P2	GTCCCTCGGGTCTCAGGTCA
ABCD4_+_74769625.23-P1P2	h2_supp5	ABCD4	P1P2	GGCTGGGCTCCAGAGTCCCT
ABCD4_+_74769649.23-P1P2	h2_top5	ABCD4	P1P2	GCTACCCAGTACTGAACTAG
ABCD4_-_74769174.23-P1P2	h2_supp5	ABCD4	P1P2	Gagagtggctgtctgaaaag
ABCD4_-_74769631.23-P1P2	h2_top5	ABCD4	P1P2	GGCCATGACCTGAGACCCGA
ABCD4_-_74769666.23-P1P2	h2_supp5	ABCD4	P1P2	GGCTGCCCCTAGTTCAGTAC
ABCD4_-_74769682.23-P1P2	h2_top5	ABCD4	P1P2	GTACTGGGTAGAGTCCGAGG
ABCD4_-_74769729.23-P1P2	h2_top5	ABCD4	P1P2	GCGGCGTTTGATAGAGAGGA
ABCE1_+_146019317.23-P1P2	h1_top5	ABCE1	P1P2	GCGTTGGCGAAGCCAGCTGC
ABCE1_+_146019463.23-P1P2	h1_top5	ABCE1	P1P2	GCGGCCACCGGCCAAAATGG
ABCE1_+_146019466.23-P1P2	h1_supp5	ABCE1	P1P2	GTCACGGCCACCGGCCAAAA
ABCE1_+_146019482.23-P1P2	h1_supp5	ABCE1	P1P2	GGCCACACAGCGTGTTCTCA
ABCE1_+_146019651.23-P1P2	h1_supp5	ABCE1	P1P2	GCCACCTAAGGCCTAACCAA
ABCE1_+_146019792.23-P1P2	h1_supp5	ABCE1	P1P2	GCGGGTGTGGCAGGCAACAG
ABCE1_+_146019842.23-P1P2	h1_top5	ABCE1	P1P2	GAAAGGGGGAGTGGAGACTA
ABCE1_-_146019439.23-P1P2	h1_supp5	ABCE1	P1P2	GGCGCGCGCACTACGTCCTA
ABCE1_-_146019502.23-P1P2	h1_top5	ABCE1	P1P2	GGCCGTGAGAACACGCTGTG
ABCE1_-_146019516.23-P1P2	h1_top5	ABCE1	P1P2	GCTGTGTGGCTGAAAAGTGA
ABCF1_+_30539238.23-P1	h4_top5	ABCF1	P1	GGTGGCAGTTACAGCTACTG
ABCF1_+_30539434.23-P1	h4_supp5	ABCF1	P1	GTGCGCAGTAACTCCCGCAG
ABCF1_+_30539469.23-P1	h4_top5	ABCF1	P1	GTCCCCGGCAAACTCCTCCC
ABCF1_+_30539647.23-P1	h4_top5	ABCF1	P1	GCCTGGTGGAATACAGTGTA
ABCF1_+_30539664.23-P1	h4_supp5	ABCF1	P1	GGGCAGGGCTCATATATTCC
ABCF1_+_30546312.23-P2	h4_top5	ABCF1	P2	GCCGGCTTGGCAGGCTTAGG
ABCF1_+_30546315.23-P2	h4_top5	ABCF1	P2	GTCTCCGGCTTGGCAGGCTT
ABCF1_+_30546387.23-P2	h4_supp5	ABCF1	P2	GATGGCCAGAAGGTGCTAAA
ABCF1_+_30546397.23-P2	h4_supp5	ABCF1	P2	GTTACTCCACCATGGCCAGA
ABCF1_+_30546405.23-P2	h4_supp5	ABCF1	P2	GGCGGGAAATTACTCCACCA
ABCF1_-_30539219.23-P1	h4_supp5	ABCF1	P1	GGGTTCCCCGCCGCCGGAAG
ABCF1_-_30539232.23-P1	h4_top5	ABCF1	P1	GCGGAAGCGGAAATAGCACC
ABCF1_-_30539559.23-P1	h4_supp5	ABCF1	P1	GACGTGACCTAAGTGAGACT
ABCF1_-_30539602.23-P1	h4_top5	ABCF1	P1	GTGGCACCGAGGGAGAGATG
ABCF1_-_30539728.23-P1	h4_supp5	ABCF1	P1	GGCGCGCATACACACACCTT
ABCF1_-_30546344.23-P2	h4_top5	ABCF1	P2	GTGCCAAGCCGGAGAAGAAT
ABCF1_-_30546354.23-P2	h4_top5	ABCF1	P2	GGAGAAGAATCGGATCAATA
ABCF1_-_30546366.23-P2	h4_top5	ABCF1	P2	GATCAATAAGGTGACAGTGG
ABCF1_-_30546413.23-P2	h4_supp5	ABCF1	P2	GTAGCACCTTCTGGCCATGG
ABCF1_-_30546502.23-P2	h4_supp5	ABCF1	P2	GTAGAATACATGCCCAggct
ABCF2_+_150923872.23-P1P2	h4_top5	ABCF2	P1P2	GGACGGAGACCTCCGCTGAG
ABCF2_+_150923902.23-P1P2	h4_top5	ABCF2	P1P2	GTGCGGAGCGCCAAGTTGTA
ABCF2_+_150923936.23-P1P2	h4_supp5	ABCF2	P1P2	GGGAGGAAGCCCGGAAAGTG
ABCF2_+_150923959.23-P1P2	h4_supp5	ABCF2	P1P2	GGAAGAGGCCCGAGACGGAC
ABCF2_+_150924059.23-P1P2	h4_supp5	ABCF2	P1P2	GCGAGCGTGGAGACTCGGAG
ABCF2_+_150924236.23-P1P2	h4_top5	ABCF2	P1P2	GGCGAGGCCCAGTGAGTTAG
ABCF2_+_150924287.23-P1P2	h4_top5	ABCF2	P1P2	GCCGCACGCGGAGGATCCTA
ABCF2_+_150924296.23-P1P2	h4_supp5	ABCF2	P1P2	GGTGAGCCGGCCGCACGCGG
ABCF2_+_150924331.23-P1P2	h4_supp5	ABCF2	P1P2	GGCGCGCCGAGAACCACCCG
ABCF2_-_150923882.23-P1P2	h4_top5	ABCF2	P1P2	GACCAGGTTCTGCCCCTCAG
ABCF3_+_183904140.23-P1P2	h5_supp5	ABCF3	P1P2	GGAGGCCTGGCAACAGTCCC
ABCF3_-_183903980.23-P1P2	h5_top5	ABCF3	P1P2	GTCACAGCGACTGCGCGGAC
ABCF3_-_183903991.23-P1P2	h5_top5	ABCF3	P1P2	GGCGCGGACGGGTTCCTGAG
ABCF3_-_183904021.23-P1P2	h5_top5	ABCF3	P1P2	GGACTTGCGCCGAAATCCTG
ABCF3_-_183904044.23-P1P2	h5_supp5	ABCF3	P1P2	GGCGAGTTCCCCGAAATTGA
ABCF3_-_183904344.23-P1P2	h5_supp5	ABCF3	P1P2	GGAGTCTGTGGATGACCTGG
ABCF3_-_183904356.23-P1P2	h5_top5	ABCF3	P1P2	GGACCTGGTGGAAGCTGTAG
ABCF3_-_183904380.23-P1P2	h5_top5	ABCF3	P1P2	GCTATTGCAAGAGGTGTCCG
ABCF3_-_183904399.23-P1P2	h5_supp5	ABCF3	P1P2	GGGGACAGCAAGGATGACGC
ABCF3_-_183904495.23-P1P2	h5_supp5	ABCF3	P1P2	GGAAGGGACGGCGAACGGTC
ABCG1_+_43639503.23-P1P2	h1_supp5	ABCG1	P1P2	GGAGGACGCGCTCCTGGGAG
ABCG1_+_43639544.23-P1P2	h1_top5	ABCG1	P1P2	GGGAGCCGGGCGCCACTCTA
ABCG1_+_43639681.23-P1P2	h1_top5	ABCG1	P1P2	GGCCATCGGTCCAACTTGTA
ABCG1_-_43639282.23-P1P2	h1_top5	ABCG1	P1P2	GCAGCCCGCACCCCGCGCAG
ABCG1_-_43639541.23-P1P2	h1_top5	ABCG1	P1P2	GTCCTCTGGGCGCTGACCCA
ABCG1_-_43639554.23-P1P2	h1_supp5	ABCG1	P1P2	GGACCCAGGGCACCCTAGAG
ABCG1_-_43639626.23-P1P2	h1_top5	ABCG1	P1P2	GCTCGGGATGCCCCTTGCAC
ABCG1_-_43639644.23-P1P2	h1_supp5	ABCG1	P1P2	GCCGGCAGAGAGCACGGACT
ABCG1_-_43639647.23-P1P2	h1_supp5	ABCG1	P1P2	GGCAGAGAGCACGGACTAGG
ABCG1_-_43639652.23-P1P2	h1_supp5	ABCG1	P1P2	GGAGCACGGACTAGGTGGAG
ABCG2_+_89079727.23-P1P2	h2_supp5	ABCG2	P1P2	GGGCAGCCTGTGGAGGAACT
ABCG2_+_89079755.23-P1P2	h2_supp5	ABCG2	P1P2	GCCACTGAGATTGAGAGACG
ABCG2_+_89079974.23-P1P2	h2_top5	ABCG2	P1P2	GGCTCGTCCCCTGGATGTCC
ABCG2_+_89080025.23-P1P2	h2_top5	ABCG2	P1P2	GCGGTCCACAGCCCGAAGCG
ABCG2_+_89080044.23-P1P2	h2_top5	ABCG2	P1P2	GCCACTGCGTTCAGCTCTGG
ABCG2_-_89079568.23-P1P2	h2_supp5	ABCG2	P1P2	GAGAGCTCGGTCTTAACCAA
ABCG2_-_89079599.23-P1P2	h2_supp5	ABCG2	P1P2	GTCAGGATGCGTGCGCTCGG
ABCG2_-_89079947.23-P1P2	h2_supp5	ABCG2	P1P2	GTGCGGCTGGAGGTCACGAT
ABCG2_-_89079989.23-P1P2	h2_top5	ABCG2	P1P2	GGGGAGACCCGGACATCCAG
ABCG2_-_89080000.23-P1P2	h2_top5	ABCG2	P1P2	GACATCCAGGGGACGAGCTC
ABCG4_+_119019794.23-P1P2	h6_top5	ABCG4	P1P2	GGCTTCCCAGAGCCTGGTCC
ABCG4_+_119019855.23-P1P2	h6_top5	ABCG4	P1P2	GCGGCAAGGATGGTGAGAGG
ABCG4_+_119020113.23-P1P2	h6_supp5	ABCG4	P1P2	GCTCAAAACTAAGCGCCCCA
ABCG4_-_119019755.23-P1P2	h6_supp5	ABCG4	P1P2	GCCGGCGAGCAGTAGCTGGT
ABCG4_-_119019776.23-P1P2	h6_supp5	ABCG4	P1P2	GGAGAGCGCAGTCGCCCCGC
ABCG4_-_119019784.23-P1P2	h6_top5	ABCG4	P1P2	GAGTCGCCCCGCGGGCTCGG
ABCG4_-_119019798.23-P1P2	h6_top5	ABCG4	P1P2	GCTCGGAGGACACAGCGTCC
ABCG4_-_119019811.23-P1P2	h6_top5	ABCG4	P1P2	GGCGTCCGGGACCAGGCTCT
ABCG4_-_119020171.23-P1P2	h6_supp5	ABCG4	P1P2	GTGGCTTTGGGGACAgcccg
ABCG4_-_119020232.23-P1P2	h6_supp5	ABCG4	P1P2	GGGCGTCGCGCCAAGGGATG
ABCG5_+_44065447.23-P1P2	h6_top5	ABCG5	P1P2	GGGCCTGGGCATAAACAAAG
ABCG5_+_44065537.23-P1P2	h6_supp5	ABCG5	P1P2	GTAGTGGATCGGGTGGAGAG
ABCG5_+_44065669.23-P1P2	h6_supp5	ABCG5	P1P2	GCCTCCTACAGCGTCAGGTA
ABCG5_+_44065862.23-P1P2	h6_supp5	ABCG5	P1P2	GAACTGAAGCCACTCTGGGG
ABCG5_+_44065865.23-P1P2	h6_top5	ABCG5	P1P2	GCCCAACTGAAGCCACTCTG
ABCG5_-_44065428.23-P1P2	h6_top5	ABCG5	P1P2	GGAGGGCAGGCCGTAGACAC
ABCG5_-_44065433.23-P1P2	h6_top5	ABCG5	P1P2	GCAGGCCGTAGACACTGGGT
ABCG5_-_44065438.23-P1P2	h6_supp5	ABCG5	P1P2	GCGTAGACACTGGGTTGGCA
ABCG5_-_44065586.23-P1P2	h6_supp5	ABCG5	P1P2	GGAGCCCGAAGTGCCCAGAC
ABCG5_-_44065840.23-P1P2	h6_top5	ABCG5	P1P2	GGCCAACAGGCAGCAAAGCT
ABCG8_+_44066166.23-P1P2	h6_top5	ABCG8	P1P2	GCCCACAGGTCTGTGACCCT
ABCG8_+_44066180.23-P1P2	h6_top5	ABCG8	P1P2	GTCCCGGCCATGGGGCCCAC
ABCG8_+_44066240.23-P1P2	h6_supp5	ABCG8	P1P2	GCACTCACCGAGGTATCCTG
ABCG8_+_44066323.23-P1P2	h6_top5	ABCG8	P1P2	GTAGGACAGAAGGCTCCTGA
ABCG8_+_44066333.23-P1P2	h6_top5	ABCG8	P1P2	GCGGGTGGTGCTAGGACAGA
ABCG8_-_44066172.23-P1P2	h6_top5	ABCG8	P1P2	GCTAAGAGAGCTGCAGCCCA
ABCG8_-_44066199.23-P1P2	h6_supp5	ABCG8	P1P2	GGACCTGTGGGCCCCATGGC
ABCG8_-_44066213.23-P1P2	h6_supp5	ABCG8	P1P2	GATGGCCGGGAAGGCGGCAG
ABCG8_-_44066292.23-P1P2	h6_supp5	ABCG8	P1P2	GAAGTCGGCCCAGGCCTGGT
ABCG8_-_44066373.23-P1P2	h6_supp5	ABCG8	P1P2	GCCGGACATCAAGCAGTGTG
ABHD10_+_111697851.23-P1P2	h4_top5	ABHD10	P1P2	GTGAGGGACACGCTACGCAA
ABHD10_+_111697939.23-P1P2	h4_supp5	ABHD10	P1P2	GCAGCTCCGACAAGGTACCC
ABHD10_+_111698093.23-P1P2	h4_top5	ABHD10	P1P2	GCGGTAACTGACGGAACCCG
ABHD10_+_111698102.23-P1P2	h4_supp5	ABHD10	P1P2	GGCACAGGCACGGTAACTGA
ABHD10_+_111698117.23-P1P2	h4_supp5	ABHD10	P1P2	GCGCCAAAGACGCACTGCAC
ABHD10_+_111698316.23-P1P2	h4_top5	ABHD10	P1P2	GGTGTTGGCCTTTAATGCAG
ABHD10_-_111697877.23-P1P2	h4_top5	ABHD10	P1P2	GGCGTAGCGTGTCCCTCAGT
ABHD10_-_111697911.23-P1P2	h4_supp5	ABHD10	P1P2	GGCGGGGACAACTACGAAGA
ABHD10_-_111697914.23-P1P2	h4_top5	ABHD10	P1P2	GGGGACAACTACGAAGATGG
ABHD10_-_111697938.23-P1P2	h4_supp5	ABHD10	P1P2	GGCGCGCTTGGCAGCTGTGG
ABHD11_+_73152640.23-P1P2	h4_supp5	ABHD11	P1P2	GGTAGGGTGAGCTTTCGAGT
ABHD11_+_73152656.23-P1P2	h4_top5	ABHD11	P1P2	GGCCCAGCAGACAGGCCGTA
ABHD11_+_73152963.23-P1P2	h4_top5	ABHD11	P1P2	GCCGAGCCGAGGTCAGTCAA
ABHD11_+_73153163.23-P1P2	h4_supp5	ABHD11	P1P2	Gtgggcggggctgcgagcta
ABHD11_-_73152688.23-P1P2	h4_top5	ABHD11	P1P2	GGTCTGCTGGGCCAAGATCT
ABHD11_-_73153052.23-P1P2	h4_supp5	ABHD11	P1P2	GCGCGAAGCTAGGGCCGTGG
ABHD11_-_73153080.23-P1P2	h4_supp5	ABHD11	P1P2	GCCCTCACGCGGGAGCCTCC
ABHD11_-_73153094.23-P1P2	h4_top5	ABHD11	P1P2	GCCTCCAGGCTCGGGTCCAG
ABHD11_-_73153115.23-P1P2	h4_supp5	ABHD11	P1P2	GGAGCATGCTTGCAAGCTGT
ABHD11_-_73153135.23-P1P2	h4_top5	ABHD11	P1P2	GGGCCGGCTCGCATCTCACA
ABHD12B_+_51339177.23-P1P2	h7_top5	ABHD12B	P1P2	GTTGAGGCTGAGGATAGCAA
ABHD12B_-_51338832.23-P1P2	h7_top5	ABHD12B	P1P2	GCGCCGGGGCGGGAAGGTCG
ABHD12B_-_51338864.23-P1P2	h7_top5	ABHD12B	P1P2	GCGGACTGCAGCTCCCGCGG
ABHD12B_-_51338879.23-P1P2	h7_supp5	ABHD12B	P1P2	GGCGGCGGTGGCGGCGTATC
ABHD12B_-_51338885.23-P1P2	h7_top5	ABHD12B	P1P2	GGTGGCGGCGTATCGGGACA
ABHD12B_-_51338895.23-P1P2	h7_supp5	ABHD12B	P1P2	GATCGGGACACGGCGCGGGA
ABHD12B_-_51338913.23-P1P2	h7_supp5	ABHD12B	P1P2	GATGGACGCGCAGGACTGCC
ABHD12B_-_51338916.23-P1P2	h7_supp5	ABHD12B	P1P2	GGACGCGCAGGACTGCCAGG
ABHD12B_-_51339227.23-P1P2	h7_top5	ABHD12B	P1P2	GCTGGACCAGCGAGACTCTC
ABHD12B_-_51339232.23-P1P2	h7_supp5	ABHD12B	P1P2	GCCAGCGAGACTCTCAGGTT
ABHD12_+_25371025.23-P1P2	h6_supp5	ABHD12	P1P2	GTGGCCGTCCGCCCGATCCG
ABHD12_+_25371393.23-P1P2	h6_top5	ABHD12	P1P2	GTGGCGGCGGCTGTGAGCGG
ABHD12_+_25371436.23-P1P2	h6_top5	ABHD12	P1P2	GCTGGGATGTGAGGAGCGGC
ABHD12_-_25371009.23-P1P2	h6_supp5	ABHD12	P1P2	GCGGGCCAAATGCGGGACAC
ABHD12_-_25371014.23-P1P2	h6_supp5	ABHD12	P1P2	GCAAATGCGGGACACAGGCG
ABHD12_-_25371024.23-P1P2	h6_supp5	ABHD12	P1P2	GACACAGGCGCGGACGGGGG
ABHD12_-_25371053.23-P1P2	h6_top5	ABHD12	P1P2	GTCGGGCGGACGGCCACTCT
ABHD12_-_25371057.23-P1P2	h6_top5	ABHD12	P1P2	GGCGGACGGCCACTCTGGGA
ABHD12_-_25371074.23-P1P2	h6_supp5	ABHD12	P1P2	GGAGGGGCTGGGAGGTACCG
ABHD12_-_25371489.23-P1P2	h6_top5	ABHD12	P1P2	GTGCGCCGGCTACGAACCAG
ABHD13_+_108870795.23-P1P2	h3_top5	ABHD13	P1P2	GCGCCGGCAAATGCCCCCGC
ABHD13_+_108870811.23-P1P2	h3_top5	ABHD13	P1P2	GGCCCCCGCTCGGGTGTCGC
ABHD13_+_108871155.23-P1P2	h3_supp5	ABHD13	P1P2	GGCCCCCGCACGACCCCCAG
ABHD13_+_108871228.23-P1P2	h3_top5	ABHD13	P1P2	GTGAGTGGTGAGCGGAGTCG
ABHD13_+_108871236.23-P1P2	h3_supp5	ABHD13	P1P2	GTCCCCTGGTGAGTGGTGAG
ABHD13_-_108870880.23-P1P2	h3_top5	ABHD13	P1P2	GGGAGCTCCGGGCTAGACCG
ABHD13_-_108870892.23-P1P2	h3_supp5	ABHD13	P1P2	GTAGACCGTGGCGCCGGCAG
ABHD13_-_108870927.23-P1P2	h3_supp5	ABHD13	P1P2	GGGAGGATGATGAGGAGCGA
ABHD13_-_108871256.23-P1P2	h3_top5	ABHD13	P1P2	GTCCGCTCACCACTCACCAG
ABHD13_-_108871313.23-P1P2	h3_supp5	ABHD13	P1P2	GAAGGTGCGCGCATTGCCAG
ABHD14A_+_52009088.23-P1P2	h3_supp5	ABHD14A	P1P2	GGCCAGGAGCGCGGCCATCT
ABHD14A_+_52009119.23-P1P2	h3_supp5	ABHD14A	P1P2	GGCAGCTCCGCGGGCCGCTC
ABHD14A_+_52009149.23-P1P2	h3_top5	ABHD14A	P1P2	GCCGCACAGCGCCCCGACCA
ABHD14A_+_52009194.23-P1P2	h3_top5	ABHD14A	P1P2	GCCCAACGGGATGAGCGGGC
ABHD14A_+_52009199.23-P1P2	h3_supp5	ABHD14A	P1P2	GCCGGGCCCAACGGGATGAG
ABHD14A_+_52009255.23-P1P2	h3_top5	ABHD14A	P1P2	GGGTAAAGACGGCCCTCCCC
ABHD14A_-_52009122.23-P1P2	h3_top5	ABHD14A	P1P2	GGCTCCTGGCCGCCTAGAGC
ABHD14A_-_52009154.23-P1P2	h3_supp5	ABHD14A	P1P2	GGGAGCTGCGGAGGCAGCCA
ABHD14A_-_52009160.23-P1P2	h3_top5	ABHD14A	P1P2	GGCGGAGGCAGCCATGGTCG
ABHD14A_-_52009315.23-P1P2	h3_supp5	ABHD14A	P1P2	GGCCCCGGGGCAGAGTCCCG
ABHD14B_+_52007815.23-P1	h3_top5	ABHD14B	P1	GGAGCCAGAACCGTAGTCCG
ABHD14B_+_52016945.23-P2	h3_top5	ABHD14B	P2	GGCCCACACTGAACTCCAGG
ABHD14B_+_52017055.23-P2	h3_supp5	ABHD14B	P2	GCTCCTCGGCAAGTCTCCAA
ABHD14B_+_52017325.23-P2	h3_top5	ABHD14B	P2	GAGATCCGGATCCCGTcccc
ABHD14B_+_52017350.23-P2	h3_top5	ABHD14B	P2	GGCCTCAGCGAGATTACTGG
ABHD14B_+_52017353.23-P2	h3_supp5	ABHD14B	P2	GCGGGCCTCAGCGAGATTAC
ABHD14B_-_52007690.23-P1	h3_supp5	ABHD14B	P1	GcacaggcgcgcTTCCACAC
ABHD14B_-_52007852.23-P1	h3_supp5	ABHD14B	P1	GTGGCTCGCTAGCTCTGGAA
ABHD14B_-_52007865.23-P1	h3_supp5	ABHD14B	P1	GCTGGAAGGGAGCACCGGGA
ABHD14B_-_52007985.23-P1	h3_top5	ABHD14B	P1	GAGTGCAGGGCGGGTACCTG
ABHD14B_-_52007995.23-P1	h3_top5	ABHD14B	P1	GGGGTACCTGGGGAGCTGCG
ABHD14B_-_52008010.23-P1	h3_supp5	ABHD14B	P1	GTGCGTGGACTCGCGCAGAC
ABHD14B_-_52008027.23-P1	h3_top5	ABHD14B	P1	GACGGGAAGCAGGCGCGTGC
ABHD14B_-_52008030.23-P1	h3_supp5	ABHD14B	P1	GGGAAGCAGGCGCGTGCTGG
ABHD14B_-_52008040.23-P1	h3_top5	ABHD14B	P1	GGCGTGCTGGCGGTGACCTG
ABHD14B_-_52016935.23-P2	h3_supp5	ABHD14B	P2	GGGCAGAACCTTGCAGGAAG
ABHD14B_-_52016965.23-P2	h3_top5	ABHD14B	P2	GGCCTCCTGGAGTTCAGTGT
ABHD14B_-_52017160.23-P2	h3_supp5	ABHD14B	P2	GTTCCTCCCGCCCTATCCGG
ABHD14B_-_52017383.23-P2	h3_top5	ABHD14B	P2	GTCGCTGAGGCCCGAACCAG
ABHD14B_-_52017387.23-P2	h3_supp5	ABHD14B	P2	GTGAGGCCCGAACCAGAGGC
ABHD15_+_27893596.23-P1P2	h7_supp5	ABHD15	P1P2	GGCCCGGGAGTACCTGCAGT
ABHD15_+_27893970.23-P1P2	h7_supp5	ABHD15	P1P2	GGCTTCGCCATGCCGCCGTG
ABHD15_-_27893577.23-P1P2	h7_top5	ABHD15	P1P2	GGGTCCTACCACCCAGTCCA
ABHD15_-_27893616.23-P1P2	h7_supp5	ABHD15	P1P2	GGCCAACTGCAGGTACTCCC
ABHD15_-_27893641.23-P1P2	h7_top5	ABHD15	P1P2	GGCTCAGGCCCAGGCGCTAC
ABHD15_-_27893654.23-P1P2	h7_top5	ABHD15	P1P2	GCGCTACGGGCAGGACGAAG
ABHD15_-_27893937.23-P1P2	h7_supp5	ABHD15	P1P2	GGGGCCGAGCAGGCCGAGAA
ABHD15_-_27893964.23-P1P2	h7_supp5	ABHD15	P1P2	GACGGCCAAGATGAGCGCGA
ABHD15_-_27893980.23-P1P2	h7_top5	ABHD15	P1P2	GCGAGGGCGGCGCCCCACGG
ABHD15_-_27894008.23-P1P2	h7_top5	ABHD15	P1P2	GGAAGCTGGAGAgccccggc
ABHD16A_+_31670831.23-P1P2	h6_supp5	ABHD16A	P1P2	GGCCCATAATGGGAAATAAG
ABHD16A_+_31671120.23-P1P2	h6_top5	ABHD16A	P1P2	GAGGGCACACAACACCTCAG
ABHD16A_+_31671138.23-P1P2	h6_top5	ABHD16A	P1P2	GCGGTACGGGCTGACGTCAA
ABHD16A_-_31670442.23-P1P2	h6_supp5	ABHD16A	P1P2	GCGGGTCTCCAGGCTAGGTT
ABHD16A_-_31670645.23-P1P2	h6_supp5	ABHD16A	P1P2	GCGGGACTCAAGACTCAACT
ABHD16A_-_31670650.23-P1P2	h6_supp5	ABHD16A	P1P2	GCTCAAGACTCAACTGGGAC
ABHD16A_-_31670671.23-P1P2	h6_top5	ABHD16A	P1P2	GGCACGAACCACGACACACA
ABHD16A_-_31670675.23-P1P2	h6_supp5	ABHD16A	P1P2	GGAACCACGACACACAGGGT
ABHD16A_-_31670679.23-P1P2	h6_top5	ABHD16A	P1P2	GCACGACACACAGGGTCGGG
ABHD16A_-_31670764.23-P1P2	h6_top5	ABHD16A	P1P2	GAAGGAGGCGGCCAGTCCGT
ABHD16B_+_62492825.23-P1P2	h7_top5	ABHD16B	P1P2	GAGGCACAGGGCAGTCTTAG
ABHD16B_+_62492837.23-P1P2	h7_top5	ABHD16B	P1P2	GGATCGCCGCGAGAGGCACA
ABHD16B_+_62492887.23-P1P2	h7_top5	ABHD16B	P1P2	GAGCAGATGACGCACATGAG
ABHD16B_+_62493200.23-P1P2	h7_supp5	ABHD16B	P1P2	GAGCCAGCGGCCCAGCGAGT
ABHD16B_+_62493236.23-P1P2	h7_top5	ABHD16B	P1P2	GGCGCGCGTCATCAGGGACA
ABHD16B_+_62493242.23-P1P2	h7_supp5	ABHD16B	P1P2	GAGCAGCGCGCGCGTCATCA
ABHD16B_+_62493291.23-P1P2	h7_supp5	ABHD16B	P1P2	GGCCGTGGTAGCGCTCCACG
ABHD16B_-_62492870.23-P1P2	h7_top5	ABHD16B	P1P2	GCGCGGCGATCCCGGCCCAG
ABHD16B_-_62493095.23-P1P2	h7_supp5	ABHD16B	P1P2	GTGCTGCGGGACGAGACGCT
ABHD16B_-_62493298.23-P1P2	h7_supp5	ABHD16B	P1P2	GCAGGGCCAAGAGCGCCTCG
ABHD17A_+_1885071.23-P1P2	h2_supp5	ABHD17A	P1P2	GGGAGCACCCGTCCGAGCCG
ABHD17A_+_1885470.23-P1P2	h2_top5	ABHD17A	P1P2	GGCTCACTTCCGTCCGTggg
ABHD17A_-_1885045.23-P1P2	h2_top5	ABHD17A	P1P2	GGAAGCGTTTGTCGGACTGG
ABHD17A_-_1885067.23-P1P2	h2_supp5	ABHD17A	P1P2	GCAGTTTCGGGGCAAAAGAG
ABHD17A_-_1885076.23-P1P2	h2_top5	ABHD17A	P1P2	GGGCAAAAGAGCGGAATCCG
ABHD17A_-_1885086.23-P1P2	h2_supp5	ABHD17A	P1P2	GCGGAATCCGCGGCTCGGAC
ABHD17A_-_1885099.23-P1P2	h2_top5	ABHD17A	P1P2	GTCGGACGGGTGCTCCCCGA
ABHD17A_-_1885105.23-P1P2	h2_supp5	ABHD17A	P1P2	GGGGTGCTCCCCGAAGGCAA
ABHD17A_-_1885122.23-P1P2	h2_supp5	ABHD17A	P1P2	GAAGGGCCGCGTCCGCAGGA
ABHD17A_-_1885483.23-P1P2	h2_top5	ABHD17A	P1P2	GccgcagctccccccACGGA
ABHD17B_+_74525655.23-P1P2	h7_top5	ABHD17B	P1P2	GGTCTGCAGGCGGAGAGAGT
ABHD17B_+_74525744.23-P1P2	h7_supp5	ABHD17B	P1P2	GAGCGTGAGCGGGGCCCCTG
ABHD17B_+_74525862.23-P1P2	h7_top5	ABHD17B	P1P2	GAGGCCCGAGAGCAACCGAC
ABHD17B_+_74526081.23-P1P2	h7_supp5	ABHD17B	P1P2	GTGGCCAACTCCTGGCTCAG
ABHD17B_+_74526089.23-P1P2	h7_top5	ABHD17B	P1P2	GCCAGTCAGTGGCCAACTCC
ABHD17B_+_74526100.23-P1P2	h7_supp5	ABHD17B	P1P2	GGGCACCTTCCTCCAGTCAG
ABHD17B_-_74525630.23-P1P2	h7_supp5	ABHD17B	P1P2	GCGACGCGCTGTCCTCCACA
ABHD17B_-_74525690.23-P1P2	h7_top5	ABHD17B	P1P2	GCTGCAGACTGGCCCGACAG
ABHD17B_-_74525704.23-P1P2	h7_top5	ABHD17B	P1P2	GGACAGAGGAGCGGGGACCA
ABHD17B_-_74526135.23-P1P2	h7_supp5	ABHD17B	P1P2	GAAGGTGCCAAAGCTGACCC
ABHD17C_+_80987662.23-P1P2	h7_top5	ABHD17C	P1P2	Ggctggcaggcgagcgcgga
ABHD17C_+_80987691.23-P1P2	h7_supp5	ABHD17C	P1P2	Gaggacggaggacggacgcg
ABHD17C_+_80987703.23-P1P2	h7_top5	ABHD17C	P1P2	GggctggcCcgggaggacgg
ABHD17C_+_80987878.23-P1P2	h7_top5	ABHD17C	P1P2	GCCGTGTAGGTGGGCTCGGG
ABHD17C_+_80987887.23-P1P2	h7_top5	ABHD17C	P1P2	GgcgccagcACCGTGTAGGT
ABHD17C_+_80988086.23-P1P2	h7_top5	ABHD17C	P1P2	GCGCGAGAAGAAGACCTCGA
ABHD17C_+_80988162.23-P1P2	h7_supp5	ABHD17C	P1P2	GCGAGAAGAGCAGCGTGTAG
ABHD17C_-_80987718.23-P1P2	h7_supp5	ABHD17C	P1P2	Ggtccgtcctccgtcctccc
ABHD17C_-_80988060.23-P1P2	h7_supp5	ABHD17C	P1P2	GCCTCAGCGAGCGCGCCGAC
ABHD17C_-_80988126.23-P1P2	h7_supp5	ABHD17C	P1P2	GGCGCACGGCCCGGGACAAC
ABHD1_+_27346724.23-P1P2	h3_supp5	ABHD1	P1P2	GACCCGCCGCCCGCCATAGG
ABHD1_+_27346727.23-P1P2	h3_supp5	ABHD1	P1P2	GCCCACCCGCCGCCCGCCAT
ABHD1_+_27347051.23-P1P2	h3_supp5	ABHD1	P1P2	GGAGCCGACTCTCCATTCGG
ABHD1_+_27347075.23-P1P2	h3_top5	ABHD1	P1P2	GGGATGCAGAGGCACTAGAG
ABHD1_+_27347086.23-P1P2	h3_top5	ABHD1	P1P2	GGGGATCACATGGGATGCAG
ABHD1_+_27347095.23-P1P2	h3_top5	ABHD1	P1P2	GGCTGGCATGGGGATCACAT
ABHD1_+_27347132.23-P1P2	h3_top5	ABHD1	P1P2	GTATAGGGAGCAGCACCCTC
ABHD1_-_27346733.23-P1P2	h3_top5	ABHD1	P1P2	GGACCTGCACAGGCCGCCTA
ABHD1_-_27346736.23-P1P2	h3_supp5	ABHD1	P1P2	GCTGCACAGGCCGCCTATGG
ABHD1_-_27347069.23-P1P2	h3_supp5	ABHD1	P1P2	GCTACCACCGAATGGAGAGT
ABHD2_+_89631693.23-P1P2	h3_top5	ABHD2	P1P2	GGATATACAGCCGGAACCCC
ABHD2_+_89632075.23-P1P2	h3_top5	ABHD2	P1P2	GCAGGAGTGAGCACCAATGG
ABHD2_+_89632196.23-P1P2	h3_supp5	ABHD2	P1P2	GgaGGCCTCTCGGGTATCTC
ABHD2_-_89631662.23-P1P2	h3_supp5	ABHD2	P1P2	GGGCGTGGCGGCAGTTACTT
ABHD2_-_89631738.23-P1P2	h3_top5	ABHD2	P1P2	GTGAGCGCCGCTGGCAGCCG
ABHD2_-_89631760.23-P1P2	h3_top5	ABHD2	P1P2	GAGCTGCAGGAACCAGACTG
ABHD2_-_89631921.23-P1P2	h3_supp5	ABHD2	P1P2	GCGCAGCCTGAGGGGATCCT
ABHD2_-_89631993.23-P1P2	h3_supp5	ABHD2	P1P2	GGTGGGGACAGCCCAGATCG
ABHD2_-_89632047.23-P1P2	h3_supp5	ABHD2	P1P2	GCCTTCTGCCCGAGGAACCG
ABHD2_-_89632154.23-P1P2	h3_top5	ABHD2	P1P2	GGGCTCGGCGAAGAAGGTCC
ABHD3_+_19284354.23-P1P2	h7_top5	ABHD3	P1P2	GCGGCAGCCCCGGGGATAGG
ABHD3_+_19284534.23-P1P2	h7_top5	ABHD3	P1P2	GGGGTGGGGTTCTTCGGCTC
ABHD3_+_19284717.23-P1P2	h7_top5	ABHD3	P1P2	GAGACACTGTGGTCGGGAGT
ABHD3_+_19284728.23-P1P2	h7_top5	ABHD3	P1P2	GCGCCAGGCAGGAGACACTG
ABHD3_-_19284369.23-P1P2	h7_supp5	ABHD3	P1P2	GAGCTCGCCGCCTATCCCCG
ABHD3_-_19284492.23-P1P2	h7_supp5	ABHD3	P1P2	GATGCTGCTCAGGTAGTAGA
ABHD3_-_19284521.23-P1P2	h7_supp5	ABHD3	P1P2	GGACGCTGAAGCCCAGGATA
ABHD3_-_19284683.23-P1P2	h7_supp5	ABHD3	P1P2	GGGAGAGCCGGCTGGCgagc
ABHD3_-_19284708.23-P1P2	h7_supp5	ABHD3	P1P2	GgagcgggcgagagcggACG
ABHD3_-_19284770.23-P1P2	h7_top5	ABHD3	P1P2	GGGAGCGCGGCTTCCGACAA
ABHD4_+_23067144.23-P1P2	h3_supp5	ABHD4	P1P2	GCAGCACCAGCTGACCCGGG
ABHD4_+_23067433.23-P1P2	h3_supp5	ABHD4	P1P2	GCGGGCGAGCGCGTCTCCCA
ABHD4_+_23067458.23-P1P2	h3_supp5	ABHD4	P1P2	GGTAGAAAGCCAGGATCCCC
ABHD4_+_23067515.23-P1P2	h3_top5	ABHD4	P1P2	GCAACATGGAATCTCTCCAG
ABHD4_+_23067613.23-P1P2	h3_top5	ABHD4	P1P2	GCCACGACTGCCGTTCTGGG
ABHD4_-_23067199.23-P1P2	h3_top5	ABHD4	P1P2	GGGGCGGGCTCGCCAGGACC
ABHD4_-_23067580.23-P1P2	h3_supp5	ABHD4	P1P2	GAGCTTGTGGGACGCGGGTG
ABHD4_-_23067583.23-P1P2	h3_supp5	ABHD4	P1P2	GTTGTGGGACGCGGGTGCGG
ABHD4_-_23067625.23-P1P2	h3_top5	ABHD4	P1P2	GCTCGACTTGCCCCCCAGAA
ABHD4_-_23067680.23-P1P2	h3_top5	ABHD4	P1P2	GGCCCGGCAAAGAGAAGATG
ABHD5_+_43732395.23-P1P2	h3_top5	ABHD5	P1P2	GGCTGGCGCGGCACTTAAGG
ABHD5_+_43732435.23-P1P2	h3_supp5	ABHD5	P1P2	GTATCTCGAAGCCGGCTGAC
ABHD5_+_43732515.23-P1P2	h3_supp5	ABHD5	P1P2	GGCTTACCTCTCTCCGGTGT
ABHD5_+_43732521.23-P1P2	h3_top5	ABHD5	P1P2	GGGCTGCGCTTACCTCTCTC
ABHD5_+_43732806.23-P1P2	h3_top5	ABHD5	P1P2	GGGTGGCTTATACAACAACG
ABHD5_+_43732860.23-P1P2	h3_supp5	ABHD5	P1P2	GGGCAGAGCCCGAGCCGGTG
ABHD5_-_43732422.23-P1P2	h3_top5	ABHD5	P1P2	GTAAGTGCCGCGCCAGCCCG
ABHD5_-_43732446.23-P1P2	h3_supp5	ABHD5	P1P2	GGCCCAGTCGGCCTGTCAGC
ABHD5_-_43732464.23-P1P2	h3_top5	ABHD5	P1P2	GCCGGCTTCGAGATAAGTCC
ABHD5_-_43732886.23-P1P2	h3_supp5	ABHD5	P1P2	GCCGGCTCGGGCTCTGCCAA
ABHD6_+_58223718.23-P1P2	h4_top5	ABHD6	P1P2	GCCGCTGCAGGGAGACACTG
ABHD6_+_58223924.23-P1P2	h4_supp5	ABHD6	P1P2	GGGGGAGGCGAAGTAGAAAG
ABHD6_+_58223966.23-P1P2	h4_top5	ABHD6	P1P2	GCACTGCGAGGGGCGCCTAA
ABHD6_+_58223976.23-P1P2	h4_supp5	ABHD6	P1P2	GATCCTCTCGGCACTGCGAG
ABHD6_+_58223988.23-P1P2	h4_supp5	ABHD6	P1P2	GCAGGACCCCAAAATCCTCT
ABHD6_-_58223553.23-P1P2	h4_top5	ABHD6	P1P2	GAGCTGGGAGCGGCGCGGGT
ABHD6_-_58223594.23-P1P2	h4_top5	ABHD6	P1P2	GGCCCGGGGCTAGAGACCGA
ABHD6_-_58223751.23-P1P2	h4_supp5	ABHD6	P1P2	GCCTGCAGCGGCGCATCGAG
ABHD6_-_58223761.23-P1P2	h4_supp5	ABHD6	P1P2	GCGCATCGAGTGGAAAGAGT
ABHD6_-_58223914.23-P1P2	h4_top5	ABHD6	P1P2	GGGACAGAGTGAGGACGGGT
ABHD8_+_17413753.23-P1P2	h4_top5	ABHD8	P1P2	GGCCACTGCGGCTCAGTCTC
ABHD8_+_17413810.23-P1P2	h4_supp5	ABHD8	P1P2	GATTAGGGCCCCACTCGAGG
ABHD8_+_17413933.23-P1P2	h4_supp5	ABHD8	P1P2	GGAAGCCACGGAGCCCCAGT
ABHD8_+_17414242.23-P1P2	h4_supp5	ABHD8	P1P2	GCGTGGCTCCGCCTACTCGG
ABHD8_-_17413788.23-P1P2	h4_top5	ABHD8	P1P2	GGCAGTGGCCCCAGACATAC
ABHD8_-_17413792.23-P1P2	h4_supp5	ABHD8	P1P2	GTGGCCCCAGACATACTGGA
ABHD8_-_17413858.23-P1P2	h4_supp5	ABHD8	P1P2	GATTGTGGAGGGCAACGCAC
ABHD8_-_17414169.23-P1P2	h4_top5	ABHD8	P1P2	GAGGCCGGGTGCGTCTACGC
ABHD8_-_17414173.23-P1P2	h4_top5	ABHD8	P1P2	GCGGGTGCGTCTACGCGGGC
ABHD8_-_17414201.23-P1P2	h4_top5	ABHD8	P1P2	GCCCCTGGCGGTCAGCGCAG
ABI1_+_27149446.23-P1P2	h2_top5	ABI1	P1P2	GTGGTGGAAACCGATAGAAG
ABI1_+_27149474.23-P1P2	h2_top5	ABI1	P1P2	GCGGGCTGCGATACAGGAAG
ABI1_+_27149511.23-P1P2	h2_supp5	ABI1	P1P2	GcaaccGGGGACAGAGCGAG
ABI1_+_27149704.23-P1P2	h2_supp5	ABI1	P1P2	GTACCAGAACCTGACTCGGG
ABI1_+_27149800.23-P1P2	h2_top5	ABI1	P1P2	GGCGAGAGGAAGCGATGCAG
ABI1_+_27149865.23-P1P2	h2_supp5	ABI1	P1P2	GGGTTTGTATCCGGGCTGTG
ABI1_-_27149345.23-P1P2	h2_supp5	ABI1	P1P2	GGGACTGGAGGCTACCTGGG
ABI1_-_27149590.23-P1P2	h2_supp5	ABI1	P1P2	GgTGGCAGCCGCTGAGGTCA
ABI1_-_27149837.23-P1P2	h2_top5	ABI1	P1P2	GTCTCGCGTTAAAGAGACAG
ABI1_-_27149855.23-P1P2	h2_top5	ABI1	P1P2	GGAGGCAGCAAGGTCCGCCG
ABI2_+_204193030.23-P1P2	h5_top5	ABI2	P1P2	GACTCCGAGGACGGTCAccg
ABI2_+_204193039.23-P1P2	h5_supp5	ABI2	P1P2	GAGCCGACGGACTCCGAGGA
ABI2_+_204193043.23-P1P2	h5_supp5	ABI2	P1P2	GCGCGAGCCGACGGACTCCG
ABI2_+_204193079.23-P1P2	h5_top5	ABI2	P1P2	GCAGCGCGCGACAGGGGAGG
ABI2_+_204193085.23-P1P2	h5_supp5	ABI2	P1P2	GCAGCCCCAGCGCGCGACAG
ABI2_+_204193116.23-P1P2	h5_supp5	ABI2	P1P2	GACGGCGGCGGTAACTCGGA
ABI2_+_204193458.23-P1P2	h5_top5	ABI2	P1P2	GAGCTCCCCACCCCCATCGG
ABI2_-_204193048.23-P1P2	h5_supp5	ABI2	P1P2	GtcgccgcggTGACCGTCCT
ABI2_-_204193058.23-P1P2	h5_top5	ABI2	P1P2	GGACCGTCCTCGGAGTCCGT
ABI2_-_204193288.23-P1P2	h5_top5	ABI2	P1P2	GGAAATCCCGGGGGGCCGCC
ABI3BP_+_100711811.23-P1P2	h7_supp5	ABI3BP	P1P2	GTCTGTTAGAAAGAGTTGTT
ABI3BP_+_100712193.23-P1P2	h7_supp5	ABI3BP	P1P2	GTGGGGTGTCTACTTCTCTG
ABI3BP_+_100712238.23-P1P2	h7_top5	ABI3BP	P1P2	GCATCATTCCCCATGCGAGG
ABI3BP_+_100712278.23-P1P2	h7_supp5	ABI3BP	P1P2	GCCACTTAAATGCAGCTCCA
ABI3BP_+_100712307.23-P1P2	h7_top5	ABI3BP	P1P2	GGCCGCCCGCCTCTGTCACT
ABI3BP_-_100712220.23-P1P2	h7_top5	ABI3BP	P1P2	GAGAAGTAGACACCCCAAAC
ABI3BP_-_100712267.23-P1P2	h7_top5	ABI3BP	P1P2	GCATGGGGAATGATGCTGGT
ABI3BP_-_100712283.23-P1P2	h7_supp5	ABI3BP	P1P2	GGGTGGGTGCCTCGCAACCC
ABI3BP_-_100712320.23-P1P2	h7_top5	ABI3BP	P1P2	GGACTGTCTCCCAGTGACAG
ABI3BP_-_100712323.23-P1P2	h7_supp5	ABI3BP	P1P2	GTGTCTCCCAGTGACAGAGG
ABI3_+_47287730.23-P1P2	h7_supp5	ABI3	P1P2	GGGGATGGGGTCGGAGACTG
ABI3_+_47287798.23-P1P2	h7_top5	ABI3	P1P2	GGCAGAGGAAGCCAAGGTCG
ABI3_+_47288056.23-P1P2	h7_supp5	ABI3	P1P2	GGCCTCTGTCTGGCTCCCCA
ABI3_+_47288122.23-P1P2	h7_top5	ABI3	P1P2	GTCAGAGCCTCCCGGCCAGT
ABI3_+_47288159.23-P1P2	h7_top5	ABI3	P1P2	GTAGTCAGCGACCCGCAGCA
ABI3_+_47288453.23-P1P2	h7_supp5	ABI3	P1P2	GGTGACACCTGAGAACAGGA
ABI3_+_47288474.23-P1P2	h7_supp5	ABI3	P1P2	GACTCAGAAGGATGAACCTG
ABI3_+_47288486.23-P1P2	h7_supp5	ABI3	P1P2	GTGACCCGTGGGAACTCAGA
ABI3_+_47288524.23-P1P2	h7_top5	ABI3	P1P2	GAGCATCTGTGTGAGGACGG
ABI3_-_47288028.23-P1P2	h7_top5	ABI3	P1P2	GAGGCAGAGCAACCAATCAA
ABL1_+_133589362.23-ENST00000372348.2	h1_supp5	ABL1	ENST00000372348.2	GTCACAGGGGATGCTGAAAA
ABL1_+_133589617.23-ENST00000372348.2	h1_top5	ABL1	ENST00000372348.2	GAGGGAAATGGCATATACGT
ABL1_+_133589629.23-ENST00000372348.2	h1_top5	ABL1	ENST00000372348.2	GCAGCGAGCGTAGAGGGAAA
ABL1_+_133589636.23-ENST00000372348.2	h1_top5	ABL1	ENST00000372348.2	GGAACGGTCAGCGAGCGTAG
ABL1_+_133589652.23-ENST00000372348.2	h1_supp5	ABL1	ENST00000372348.2	GGGTTCAAGATCTTCCAGAA
ABL1_-_133589216.23-ENST00000372348.2	h1_supp5	ABL1	ENST00000372348.2	GCAAAGCAGAGAAGCGAGAG
ABL1_-_133589228.23-ENST00000372348.2	h1_top5	ABL1	ENST00000372348.2	GGCGAGAGCGGCCACTAGTT
ABL1_-_133589268.23-ENST00000372348.2	h1_top5	ABL1	ENST00000372348.2	GATGAAGAAGCTAAGATAGG
ABL1_-_133589272.23-ENST00000372348.2	h1_supp5	ABL1	ENST00000372348.2	GAGAAGCTAAGATAGGGGGT
ABL1_-_133589804.23-ENST00000372348.2	h1_supp5	ABL1	ENST00000372348.2	GAGGGAAGAAGGAATCATCG
ABL2_+_179111875.23-P1	h1_supp5	ABL2	P1	GTACTGAATGGAAGAATGTA
ABL2_+_179111908.23-P1	h1_supp5	ABL2	P1	GTGGGGGAATATCTCATAGT
ABL2_+_179112036.23-P1	h1_supp5	ABL2	P1	GAGAGTTGATAGTTTCAGGG
ABL2_+_179112061.23-P1	h1_supp5	ABL2	P1	GCTACCCGACTTAACAGGTA
ABL2_+_179112138.23-P1	h1_supp5	ABL2	P1	GTCCTTCCACCTAATAGTTA
ABL2_+_179112168.23-P1	h1_top5	ABL2	P1	GTGGGCAGAGGTATGGTCCT
ABL2_+_179112186.23-P1	h1_top5	ABL2	P1	GGTTTAACTTTTGTGCTTCT
ABL2_+_179198340.23-P2	h1_top5	ABL2	P2	GGGAGCCGGCATGAGAGCGT
ABL2_+_179198398.23-P2	h1_top5	ABL2	P2	GCGGGGCGCACCACAGAGAC
ABL2_+_179198527.23-P2	h1_supp5	ABL2	P2	GAGTACGCGAGAGCAGGGAT
ABL2_+_179198561.23-P2	h1_supp5	ABL2	P2	GGAGGAATGTGACCAGGGGT
ABL2_+_179198565.23-P2	h1_top5	ABL2	P2	GCGAGGAGGAATGTGACCAG
ABL2_+_179198736.23-P2	h1_supp5	ABL2	P2	GCGGAGCCGCGACAGGAGGA
ABL2_+_179198740.23-P2	h1_top5	ABL2	P2	GGGCGCGGAGCCGCGACAGG
ABL2_+_179198799.23-P2	h1_supp5	ABL2	P2	GGCGCTCGGTGGTTTAAAGA
ABL2_-_179112151.23-P1	h1_top5	ABL2	P1	GGATCTCTGCCATAACTATT
ABL2_-_179112154.23-P1	h1_top5	ABL2	P1	GCTCTGCCATAACTATTAGG
ABL2_-_179112158.23-P1	h1_top5	ABL2	P1	GGCCATAACTATTAGGTGGA
ABL2_-_179198654.23-P2	h1_supp5	ABL2	P2	GCCCAGGCCCTGGCCCTGAG
ABL2_-_179198834.23-P2	h1_top5	ABL2	P2	GCCGAGCGCTGGGAAAGCGT
ABLIM1_+_116417743.23-ENST00000277895.5	h5_top5	ABLIM1	ENST00000277895.5	GCAAGGACTACTGCCCACGT
ABLIM1_+_116417800.23-ENST00000277895.5	h5_supp5	ABLIM1	ENST00000277895.5	GGACCTCCTTCACCGCTCAT
ABLIM1_+_116417821.23-ENST00000277895.5	h5_supp5	ABLIM1	ENST00000277895.5	GTGAGGACCGGAGGGTCTCT
ABLIM1_+_116417829.23-ENST00000277895.5	h5_top5	ABLIM1	ENST00000277895.5	GCTGATTGTTGAGGACCGGA
ABLIM1_+_116417833.23-ENST00000277895.5	h5_supp5	ABLIM1	ENST00000277895.5	GGAGACTGATTGTTGAGGAC
ABLIM1_+_116418018.23-ENST00000277895.5	h5_top5	ABLIM1	ENST00000277895.5	GGGGAACAGAGAGAATTGTG
ABLIM1_-_116417795.23-ENST00000277895.5	h5_top5	ABLIM1	ENST00000277895.5	GTACAGCAAATGAGTGATAG
ABLIM1_-_116417810.23-ENST00000277895.5	h5_top5	ABLIM1	ENST00000277895.5	GATAGTGGCACGCCTATGAG
ABLIM1_-_116417816.23-ENST00000277895.5	h5_supp5	ABLIM1	ENST00000277895.5	GGCACGCCTATGAGCGGTGA
ABLIM1_-_116417819.23-ENST00000277895.5	h5_supp5	ABLIM1	ENST00000277895.5	GCGCCTATGAGCGGTGAAGG
ABLIM2_+_8160016.23-P1P2	h2_top5	ABLIM2	P1P2	GAGCAGACCTAGGCACGCAG
ABLIM2_+_8160086.23-P1P2	h2_supp5	ABLIM2	P1P2	GTGTTCCAGGCTGCAGAAAG
ABLIM2_+_8160141.23-P1P2	h2_top5	ABLIM2	P1P2	GCTGCGCCAGGATGTCTGGA
ABLIM2_+_8160204.23-P1P2	h2_top5	ABLIM2	P1P2	GCCCGGAGCGCGTAGCTCAG
ABLIM2_+_8160328.23-P1P2	h2_supp5	ABLIM2	P1P2	GAGGGCTGGGTGGCATTCGG
ABLIM2_+_8160487.23-P1P2	h2_supp5	ABLIM2	P1P2	Gggcgggcggaggatagcgc
ABLIM2_+_8160523.23-P1P2	h2_top5	ABLIM2	P1P2	Gctggcgtgtgcgcaaggag
ABLIM2_-_8160138.23-P1P2	h2_top5	ABLIM2	P1P2	GCCCGTGAGAAGCAAAGAAG
ABLIM2_-_8160157.23-P1P2	h2_supp5	ABLIM2	P1P2	GGGGCGCCTTCCAGACATCC
ABLIM2_-_8160471.23-P1P2	h2_supp5	ABLIM2	P1P2	GCTGCGACAGCCAGACCCTC
ABLIM3_+_148521081.23-P1P2	h5_supp5	ABLIM3	P1P2	GGAGCTCGACATCCATGATG
ABLIM3_+_148521102.23-P1P2	h5_top5	ABLIM3	P1P2	GGGCTAGCAATGCGAAATAG
ABLIM3_+_148521122.23-P1P2	h5_supp5	ABLIM3	P1P2	GTCTGGGGTCTCGAATTCCA
ABLIM3_+_148521137.23-P1P2	h5_supp5	ABLIM3	P1P2	GGAATCCTGGTCCTCGTCTG
ABLIM3_+_148521279.23-P1P2	h5_supp5	ABLIM3	P1P2	GGGGGGTGTGGACCACAGGG
ABLIM3_+_148521297.23-P1P2	h5_supp5	ABLIM3	P1P2	GGCGGCTCCGGAGCCCAAAG
ABLIM3_+_148521451.23-P1P2	h5_top5	ABLIM3	P1P2	GTGAAGGCGCGTGGACTAAT
ABLIM3_-_148521229.23-P1P2	h5_top5	ABLIM3	P1P2	GGGCCGAGAGGTGGGTTCCG
ABLIM3_-_148521482.23-P1P2	h5_top5	ABLIM3	P1P2	GCACGCGCCTTCAAGGCCAG
ABLIM3_-_148521503.23-P1P2	h5_top5	ABLIM3	P1P2	GGCTACAGCCCAGACAGAGA
ABO_+_136130684.23-P2	h1_supp5	ABO	P2	GAATCGCAGATACGCCCTTC
ABO_+_136150190.23-P1	h1_top5	ABO	P1	GCCGACCCTGGACTAGGACA
ABO_+_136150541.23-P1	h1_supp5	ABO	P1	GCGGCCCCGGGTGCCCGCGA
ABO_+_136150587.23-P1	h1_supp5	ABO	P1	GAGCCATGGCCGAGGTGTTG
ABO_+_136150601.23-P1	h1_top5	ABO	P1	GGAGACCAGACGCGGAGCCA
ABO_-_136130683.23-P2	h1_supp5	ABO	P2	GgtgtAATGGTGTGTTTCTG
ABO_-_136130692.23-P2	h1_top5	ABO	P2	GTGTGTTTCTGTGGCCGGAA
ABO_-_136130896.23-P2	h1_supp5	ABO	P2	GtAATGGTGTCTCTGTGGTG
ABO_-_136130899.23-P2	h1_supp5	ABO	P2	GTGGTGTCTCTGTGGTGGGG
ABO_-_136130921.23-P2	h1_top5	ABO	P2	GGGGTGTGTGTGATTTGAGG
ABO_-_136130928.23-P2	h1_supp5	ABO	P2	GTGTGATTTGAGGTGGGGAC
ABO_-_136130955.23-P2	h1_top5	ABO	P2	GGGCTTCAGTTACTCACAAC
ABO_-_136130959.23-P2	h1_top5	ABO	P2	GTCAGTTACTCACAACAGGA
ABO_-_136130966.23-P2	h1_top5	ABO	P2	GCTCACAACAGGACGGACAA
ABO_-_136150162.23-P1	h1_supp5	ABO	P1	GGCCGCCGTGCCCGAGGGAA
ABO_-_136150207.23-P1	h1_supp5	ABO	P1	GAGAGCCTTGTCCTAGTCCA
ABO_-_136150219.23-P1	h1_top5	ABO	P1	GTAGTCCAGGGTCGGGCGGT
ABO_-_136150446.23-P1	h1_supp5	ABO	P1	GCCAGGACGCAGGGTCTCGG
ABO_-_136150600.23-P1	h1_top5	ABO	P1	GGCCAGCGTCCGCAACACCT
ABO_-_136150606.23-P1	h1_top5	ABO	P1	GGTCCGCAACACCTCGGCCA
ABRACL_+_139349873.23-P1P2	h7_supp5	ABRACL	P1P2	GAGAAAGACGGCTGTGGAGG
ABRACL_+_139349876.23-P1P2	h7_top5	ABRACL	P1P2	GAAGAGAAAGACGGCTGTGG
ABRACL_+_139349879.23-P1P2	h7_top5	ABRACL	P1P2	GGCAAAGAGAAAGACGGCTG
ABRACL_+_139349931.23-P1P2	h7_top5	ABRACL	P1P2	GTACCTTCTTCAGTGCACTG
ABRACL_+_139350209.23-P1P2	h7_top5	ABRACL	P1P2	GAAGTCGACCCGAGAGGTGG
ABRACL_+_139350231.23-P1P2	h7_supp5	ABRACL	P1P2	GACGTCACGTGAGCCGAGTG
ABRACL_-_139350061.23-P1P2	h7_supp5	ABRACL	P1P2	GTAGGTAGCAGGGATGGACT
ABRACL_-_139350119.23-P1P2	h7_top5	ABRACL	P1P2	GTGAGAGTCGGGTCAGGAGG
ABRACL_-_139350292.23-P1P2	h7_supp5	ABRACL	P1P2	GACTGGGAAGCCGGCAGAAA
ABRACL_-_139350417.23-P1P2	h7_supp5	ABRACL	P1P2	GGCTGCCCCGAGGAACGTGG
ABRA_+_107782019.23-P1P2	h5_top5	ABRA	P1P2	GCCTCAGCCACAGGTACGAG
ABRA_+_107782028.23-P1P2	h5_supp5	ABRA	P1P2	GCGTGAGCCACCTCAGCCAC
ABRA_+_107782269.23-P1P2	h5_supp5	ABRA	P1P2	GGGCAGGCCCAGGAGCCTAC
ABRA_+_107782392.23-P1P2	h5_top5	ABRA	P1P2	GCTCCGGGCGAAAAGGAAAG
ABRA_+_107782399.23-P1P2	h5_top5	ABRA	P1P2	GAGCATGGCTCCGGGCGAAA
ABRA_+_107782407.23-P1P2	h5_supp5	ABRA	P1P2	GAGGTGGGCAGCATGGCTCC
ABRA_+_107782422.23-P1P2	h5_top5	ABRA	P1P2	GTCAGCAGAGAAAGACAGGT
ABRA_-_107782347.23-P1P2	h5_supp5	ABRA	P1P2	GCGGGCCAAGCTGATGACCA
ABRA_-_107782350.23-P1P2	h5_top5	ABRA	P1P2	GGCCAAGCTGATGACCAGGG
ABRA_-_107782371.23-P1P2	h5_supp5	ABRA	P1P2	GGCTGTGCGTATCTTCCGGA
ABR_+_1082842.23-P1P2	h4_top5	ABR	P1P2	GGGATCGGGACCCAGGCACC
ABR_+_1082862.23-P1P2	h4_top5	ABR	P1P2	GGGATCGGGACCCCAAGATC
ABR_+_1082896.23-P1P2	h4_supp5	ABR	P1P2	GGGACCCCAGGATGGAGATC
ABR_+_1083212.23-P1P2	h4_supp5	ABR	P1P2	GGCTGGGGCCGGGAGGGTTC
ABR_+_1083246.23-P1P2	h4_supp5	ABR	P1P2	GGGTTCCGGGATCCGCAGCT
ABR_+_1083266.23-P1P2	h4_top5	ABR	P1P2	GcccCCGCGAAGTTGCTCAT
ABR_-_1082914.23-P1P2	h4_supp5	ABR	P1P2	GGGTCCCGATCTCCATCCTG
ABR_-_1083030.23-P1P2	h4_supp5	ABR	P1P2	GGAGCGGCTCCATCCCGCGG
ABR_-_1083256.23-P1P2	h4_top5	ABR	P1P2	GGCCGCGCCGAGCCCAGCTG
ABR_-_1083263.23-P1P2	h4_top5	ABR	P1P2	GCGAGCCCAGCTGCGGATCC
ABT1_+_26597184.23-P1P2	h5_top5	ABT1	P1P2	GACTGACACGAGCGGCACGA
ABT1_+_26597384.23-P1P2	h5_supp5	ABT1	P1P2	GGAAGGTTGCGGACGTGCAG
ABT1_+_26597401.23-P1P2	h5_supp5	ABT1	P1P2	GCTCGCCATAGGCGCTGAGA
ABT1_+_26597412.23-P1P2	h5_top5	ABT1	P1P2	GACGCGTCCGACCTCGCCAT
ABT1_-_26597183.23-P1P2	h5_supp5	ABT1	P1P2	GCAGTTGGCAAGGCACTTTA
ABT1_-_26597263.23-P1P2	h5_top5	ABT1	P1P2	GGGAGCAAGAGCCGCTGGAA
ABT1_-_26597427.23-P1P2	h5_top5	ABT1	P1P2	GTCAGCGCCTATGGCGAGGT
ABT1_-_26597485.23-P1P2	h5_supp5	ABT1	P1P2	GCCCTGACGGTGACAGGAGG
ABT1_-_26597617.23-P1P2	h5_top5	ABT1	P1P2	GGCTGGTGAATCAGTCTGTG
ABT1_-_26597649.23-P1P2	h5_supp5	ABT1	P1P2	GGGGCGGGCGGAGGGGATAT
ABTB1_+_127391808.23-P1P2	h2_top5	ABTB1	P1P2	GGGCGAAGCCGCGCACCCGG
ABTB1_+_127391828.23-P1P2	h2_top5	ABTB1	P1P2	GCGAGCCGAACGACCTCGGG
ABTB1_+_127391831.23-P1P2	h2_top5	ABTB1	P1P2	GACCCGAGCCGAACGACCTC
ABTB1_+_127391861.23-P1P2	h2_supp5	ABTB1	P1P2	GGTCGCTGGTGTCCATGGCG
ABTB1_+_127392211.23-P1P2	h2_supp5	ABTB1	P1P2	GGCCCTACCAGGGCGAACAG
ABTB1_+_127392221.23-P1P2	h2_top5	ABTB1	P1P2	GTGACGTCCGGGCCCTACCA
ABTB1_-_127391845.23-P1P2	h2_supp5	ABTB1	P1P2	GTTCGCCGCCCGAGGTCGTT
ABTB1_-_127392172.23-P1P2	h2_supp5	ABTB1	P1P2	GGTAAGAAGGGACTGCTCAG
ABTB1_-_127392198.23-P1P2	h2_top5	ABTB1	P1P2	GCCGAAGGCGCAGAAGTGGG
ABTB1_-_127392210.23-P1P2	h2_supp5	ABTB1	P1P2	GAAGTGGGCGGAGAGAAGGC
ABTB2_+_34379321.23-P1P2	h3_supp5	ABTB2	P1P2	GTCGGGACGCCGGGAGCGTG
ABTB2_+_34379353.23-P1P2	h3_supp5	ABTB2	P1P2	GGCGACGGGGTTCTTTCCAG
ABTB2_-_34379074.23-P1P2	h3_top5	ABTB2	P1P2	GGAGTCCCCGGCCCCATACC
ABTB2_-_34379083.23-P1P2	h3_supp5	ABTB2	P1P2	GGCCCCATACCCGGAGTCCA
ABTB2_-_34379146.23-P1P2	h3_top5	ABTB2	P1P2	GGCCATGGGGAGCCTGCCGA
ABTB2_-_34379166.23-P1P2	h3_supp5	ABTB2	P1P2	GGGCGGCGTCGCCGAGCGAG
ABTB2_-_34379310.23-P1P2	h3_top5	ABTB2	P1P2	GGGAAGGTGGCCGAGATCCG
ABTB2_-_34379384.23-P1P2	h3_supp5	ABTB2	P1P2	GGAACCCCGTCGCTACCCCC
ABTB2_-_34379465.23-P1P2	h3_top5	ABTB2	P1P2	GGAATCCCGGGAGAACAGGG
ABTB2_-_34379521.23-P1P2	h3_top5	ABTB2	P1P2	GCAGGGCGCAGCGCGAGTCC
ACAA1_+_38178110.23-P1P2	h3_supp5	ACAA1	P1P2	GTCTCAAGGACGTGAATCTG
ACAA1_+_38178133.23-P1P2	h3_supp5	ACAA1	P1P2	GCTCTCGGCAGTCATGACCG
ACAA1_+_38178488.23-P1P2	h3_top5	ACAA1	P1P2	GTAGTGCTGGGCCACCTGAG
ACAA1_+_38178517.23-P1P2	h3_top5	ACAA1	P1P2	GGTTGACCTGCGCAATGCAG
ACAA1_+_38178570.23-P1P2	h3_top5	ACAA1	P1P2	GCGGCTGTCTGTTAACTCCG
ACAA1_-_38178165.23-P1P2	h3_supp5	ACAA1	P1P2	GACTGCCGAGAGAAGCTCGT
ACAA1_-_38178168.23-P1P2	h3_top5	ACAA1	P1P2	GGCCGAGAGAAGCTCGTCGG
ACAA1_-_38178171.23-P1P2	h3_supp5	ACAA1	P1P2	GGAGAGAAGCTCGTCGGGGG
ACAA1_-_38178499.23-P1P2	h3_supp5	ACAA1	P1P2	GATCGGCCGGACCCCTCAGG
ACAA1_-_38178575.23-P1P2	h3_top5	ACAA1	P1P2	GCCAGTCCGGGAACTGACCG
ACAA2_+_47339402.23-P1P2	h3_supp5	ACAA2	P1P2	GCCCGGGTGAATCGATGGAG
ACAA2_+_47339407.23-P1P2	h3_supp5	ACAA2	P1P2	GGGCTCCCCGGGTGAATCGA
ACAA2_+_47339850.23-P1P2	h3_top5	ACAA2	P1P2	GGACGACCCAGCAGCCGCCA
ACAA2_-_47339441.23-P1P2	h3_supp5	ACAA2	P1P2	GCGGGGAGCCCTGACCACCG
ACAA2_-_47339449.23-P1P2	h3_top5	ACAA2	P1P2	GCCTGACCACCGAGGCCGAG
ACAA2_-_47339655.23-P1P2	h3_supp5	ACAA2	P1P2	GGCTAGCGCCTTACAAGTAA
ACAA2_-_47339855.23-P1P2	h3_top5	ACAA2	P1P2	GTCACCTCGGAGCAGAGCCA
ACAA2_-_47339858.23-P1P2	h3_top5	ACAA2	P1P2	GCCTCGGAGCAGAGCCATGG
ACAA2_-_47339876.23-P1P2	h3_top5	ACAA2	P1P2	GGCGGCTGCTGGGTCGTCGG
ACAA2_-_47339894.23-P1P2	h3_supp5	ACAA2	P1P2	GGCGGCGCGGGTCTGTGGTG
ACACA_+_35715534.23-P1P2	h1_top5	ACACA	P1P2	GGAGAGGGAGAAGACCACGT
ACACA_+_35715655.23-P1P2	h1_top5	ACACA	P1P2	GAGGGCTCCTCTAGGAAGGG
ACACA_+_35715673.23-P1P2	h1_supp5	ACACA	P1P2	GCTGGGAGGCGTACAGTTCA
ACACA_+_35715687.23-P1P2	h1_supp5	ACACA	P1P2	GTTCAGATCCCGGAACTGGG
ACACA_-_35715615.23-P1P2	h1_supp5	ACACA	P1P2	GATCAGACCACGCTGGAGCT
ACACA_-_35715847.23-P1P2	h1_top5	ACACA	P1P2	GGCCGCGTGCGGGTGAGCGG
ACACA_-_35715962.23-P1P2	h1_supp5	ACACA	P1P2	GCTCAGGGTGGCAACGTGTG
ACACA_-_35715992.23-P1P2	h1_top5	ACACA	P1P2	GTTCCGGAGCCCCTGCGTGG
ACACA_-_35716002.23-P1P2	h1_top5	ACACA	P1P2	GCCTGCGTGGAGGAACTGCT
ACACA_-_35716041.23-P1P2	h1_supp5	ACACA	P1P2	GGGCTCGGGCGATGGCTGAC
ACACB_+_109569160.23-P1	h1_top5	ACACB	P1	GGCGCCCACAGGGTGACTAA
ACACB_+_109569170.23-P1	h1_top5	ACACB	P1	GAGGCTGACAGGCGCCCACA
ACACB_+_109569423.23-P1	h1_supp5	ACACB	P1	GTAAGTGCTGGCCAGTCACC
ACACB_+_109569572.23-P1	h1_supp5	ACACB	P1	GCTTCGCTGAAATAACCCAG
ACACB_+_109592523.23-P2	h1_supp5	ACACB	P2	GGGGGTTCTGCTGCAGCCGG
ACACB_+_109592546.23-P2	h1_supp5	ACACB	P2	GTGCAGTCCTAGAGCGCCGC
ACACB_+_109592574.23-P2	h1_top5	ACACB	P2	GCAGCCAGGTCGCGACCCGG
ACACB_+_109592577.23-P2	h1_supp5	ACACB	P2	GGGACAGCCAGGTCGCGACC
ACACB_+_109592655.23-P2	h1_top5	ACACB	P2	GTCCCACCGGGCTCCCGCAG
ACACB_+_109592908.23-P2	h1_top5	ACACB	P2	GAGGCCAGCTAGAGTTTCCA
ACACB_-_109569178.23-P1	h1_top5	ACACB	P1	GGTTCCCTTAGTCACCCTGT
ACACB_-_109569213.23-P1	h1_supp5	ACACB	P1	GCACTCAAGAATGGAGCTGG
ACACB_-_109569231.23-P1	h1_top5	ACACB	P1	GGTGGCTGCATCCCCAGTGA
ACACB_-_109569253.23-P1	h1_supp5	ACACB	P1	GTAAGTGGCAACAAGTGCTG
ACACB_-_109569626.23-P1	h1_supp5	ACACB	P1	GGTCATGATAGCGTCCACAG
ACACB_-_109569639.23-P1	h1_top5	ACACB	P1	GCCACAGAGGTTCACTGGAA
ACACB_-_109592496.23-P2	h1_top5	ACACB	P2	GCGCAGGGTGCATTTCGGGA
ACACB_-_109592519.23-P2	h1_top5	ACACB	P2	GGCAAGCGCAGCGCGAAGTT
ACACB_-_109592529.23-P2	h1_supp5	ACACB	P2	GCGCGAAGTTGGGCGCCCGC
ACACB_-_109592941.23-P2	h1_supp5	ACACB	P2	GTAGCTGGCCTTGGCGGGAG
ACAD10_+_112123853.23-P1P2	h3_supp5	ACAD10	P1P2	GTTGCGTCCGGAAGAGCAGT
ACAD10_+_112123992.23-P1P2	h3_supp5	ACAD10	P1P2	GGCCGAGGTGGATTAGGACG
ACAD10_+_112124115.23-P1P2	h3_top5	ACAD10	P1P2	GAACAAAACCATCCAGACTA
ACAD10_-_112123838.23-P1P2	h3_supp5	ACAD10	P1P2	GACCGCGCACAGCGATTGGG
ACAD10_-_112123885.23-P1P2	h3_supp5	ACAD10	P1P2	GTCCGGACGCAATTTTGAGG
ACAD10_-_112123894.23-P1P2	h3_top5	ACAD10	P1P2	GAATTTTGAGGAGGTCGGAG
ACAD10_-_112123907.23-P1P2	h3_top5	ACAD10	P1P2	GTCGGAGCGGAAGGACGTCG
ACAD10_-_112123925.23-P1P2	h3_top5	ACAD10	P1P2	GGTGGAGATTGCTTGCGCTG
ACAD10_-_112124129.23-P1P2	h3_supp5	ACAD10	P1P2	GTCTCTAACCCTAGTCTGGA
ACAD10_-_112124210.23-P1P2	h3_top5	ACAD10	P1P2	Gtctaaggggccgtagagag
ACAD11_+_132378245.23-P1P2	h3_supp5	ACAD11	P1P2	GCCCAATTGGAGGGCGGTAA
ACAD11_+_132378251.23-P1P2	h3_supp5	ACAD11	P1P2	GGGGCTTCCCAATTGGAGGG
ACAD11_+_132378312.23-P1P2	h3_top5	ACAD11	P1P2	GGTCAGTGGACGCACCCTAC
ACAD11_+_132378627.23-P1P2	h3_supp5	ACAD11	P1P2	GCTTCGGCACTCGAGACCTG
ACAD11_+_132379379.23-P1P2	h3_top5	ACAD11	P1P2	GCGCTCCACAGACTCCGCCA
ACAD11_-_132378357.23-P1P2	h3_supp5	ACAD11	P1P2	GCAGGAAAAGCAATCAGGGT
ACAD11_-_132378588.23-P1P2	h3_supp5	ACAD11	P1P2	GCGGACTCGCCAGTAGCACC
ACAD11_-_132378623.23-P1P2	h3_top5	ACAD11	P1P2	GCCCGCAGGCCACAGCAACG
ACAD11_-_132378633.23-P1P2	h3_top5	ACAD11	P1P2	GACAGCAACGCGGCATCCAC
ACAD11_-_132379444.23-P1P2	h3_top5	ACAD11	P1P2	GCTGGAGCGGGAACTTGCCC
ACAD8_+_134123511.23-P1P2	h1_top5	ACAD8	P1P2	GGAGGCGCGCCCCGAAACGC
ACAD8_+_134123936.23-P1P2	h1_supp5	ACAD8	P1P2	GGAACCTGCGGGGGGATGAC
ACAD8_-_134123445.23-P1P2	h1_supp5	ACAD8	P1P2	GCCCGCCAGTGCGAGCGCAA
ACAD8_-_134123448.23-P1P2	h1_top5	ACAD8	P1P2	GGCCAGTGCGAGCGCAACGG
ACAD8_-_134123455.23-P1P2	h1_top5	ACAD8	P1P2	GCGAGCGCAACGGAGGTCGA
ACAD8_-_134123480.23-P1P2	h1_supp5	ACAD8	P1P2	GTCAGACTCTTAGCTGAACG
ACAD8_-_134123488.23-P1P2	h1_supp5	ACAD8	P1P2	GTTAGCTGAACGCGGAGCTG
ACAD8_-_134123502.23-P1P2	h1_top5	ACAD8	P1P2	GAGCTGCGGCGGCTATGCTG
ACAD8_-_134123507.23-P1P2	h1_top5	ACAD8	P1P2	GCGGCGGCTATGCTGTGGAG
ACAD8_-_134123648.23-P1P2	h1_supp5	ACAD8	P1P2	GGGACAGGTGTCCAGAACCC
ACAD9_+_128598584.23-P1P2	h4_supp5	ACAD9	P1P2	GGGTAGAGACCACCAGACCC
ACAD9_+_128598604.23-P1P2	h4_top5	ACAD9	P1P2	GCGCAGTAGCCGCCGGTTCG
ACAD9_+_128598694.23-P1P2	h4_supp5	ACAD9	P1P2	GGACAGCAAGGGTTCGCCCA
ACAD9_+_128598781.23-P1P2	h4_supp5	ACAD9	P1P2	GGCCGCAGGGTGTATCTCTC
ACAD9_-_128598499.23-P1P2	h4_top5	ACAD9	P1P2	GTCCCTGCGGCGCTAAGAAG
ACAD9_-_128598508.23-P1P2	h4_top5	ACAD9	P1P2	GCGCTAAGAAGGGGAGACTG
ACAD9_-_128598528.23-P1P2	h4_top5	ACAD9	P1P2	GGGCTGAGGCTGGGGAACAT
ACAD9_-_128598541.23-P1P2	h4_top5	ACAD9	P1P2	GGAACATCGGGCAGCATGAG
ACAD9_-_128598801.23-P1P2	h4_supp5	ACAD9	P1P2	GGCCAGAGAGATACACCCTG
ACAD9_-_128598823.23-P1P2	h4_supp5	ACAD9	P1P2	GCCGAGGCGTGTTAACACTC
ACADL_+_211089708.23-P1P2	h3_supp5	ACADL	P1P2	GCATCTGGGCGGAGGAAAAA
ACADL_+_211089722.23-P1P2	h3_top5	ACADL	P1P2	GCTGGGTGCAACCAGCATCT
ACADL_+_211090089.23-P1P2	h3_supp5	ACADL	P1P2	GTTTTTTGGGAGGACACCAC
ACADL_-_211089616.23-P1P2	h3_supp5	ACADL	P1P2	GGCCGCTGAACTAGACGGGT
ACADL_-_211089695.23-P1P2	h3_top5	ACADL	P1P2	GCGGCGGTCTGTTCTCGGGG
ACADL_-_211090002.23-P1P2	h3_supp5	ACADL	P1P2	GGGCCATGTCCGAAACACAG
ACADL_-_211090030.23-P1P2	h3_top5	ACADL	P1P2	GGGCGACGGAGGCGACTCTG
ACADL_-_211090048.23-P1P2	h3_top5	ACADL	P1P2	GGCGGCTACTCGGCGACTCG
ACADL_-_211090061.23-P1P2	h3_supp5	ACADL	P1P2	GGACTCGGGGCAGGGTCCCC
ACADL_-_211090095.23-P1P2	h3_top5	ACADL	P1P2	GCAGCTGAGGCGTCCACCTG
ACADM_+_76190107.23-P1P2	h2_top5	ACADM	P1P2	GCAGCGCGGAAAGAGAGCCA
ACADM_+_76190432.23-P1P2	h2_top5	ACADM	P1P2	GCACTCGGACAATAATACAC
ACADM_+_76190695.23-P1P2	h2_top5	ACADM	P1P2	GGTCGCCTGACGGGAGGATA
ACADM_+_76190716.23-P1P2	h2_supp5	ACADM	P1P2	GGAGGATGCCGGCTATAACG
ACADM_+_76190816.23-P1P2	h2_supp5	ACADM	P1P2	GTGGTTCTGACACAGAGACG
ACADM_-_76190463.23-P1P2	h2_supp5	ACADM	P1P2	GATTGTCCGAGTGGCCGGAA
ACADM_-_76190475.23-P1P2	h2_top5	ACADM	P1P2	GGCCGGAACGGGAGCCAACA
ACADM_-_76190620.23-P1P2	h2_supp5	ACADM	P1P2	GTGGGAAGTCGGGCTGAGGA
ACADM_-_76190633.23-P1P2	h2_top5	ACADM	P1P2	GTGAGGAAGGAGCCAGCCTA
ACADM_-_76190671.23-P1P2	h2_supp5	ACADM	P1P2	GCACGCCTCCTACCACCGGA
ACADSB_+_124768533.23-P1P2	h1_supp5	ACADSB	P1P2	GGGCCCTCCATCCTCGCCGC
ACADSB_+_124768710.23-P1P2	h1_supp5	ACADSB	P1P2	GCCCGCGGGTAAAGAGTCTG
ACADSB_+_124768874.23-P1P2	h1_top5	ACADSB	P1P2	GGGTGGCTCTCAGGACGCAA
ACADSB_+_124768891.23-P1P2	h1_top5	ACADSB	P1P2	GTCCAGAGATCCAGACTCGG
ACADSB_+_124768894.23-P1P2	h1_supp5	ACADSB	P1P2	GAGATCCAGAGATCCAGACT
ACADSB_+_124768941.23-P1P2	h1_top5	ACADSB	P1P2	GGTGCGTTAGGGCATCAGGG
ACADSB_+_124768944.23-P1P2	h1_top5	ACADSB	P1P2	GAAGGTGCGTTAGGGCATCA
ACADSB_+_124768952.23-P1P2	h1_supp5	ACADSB	P1P2	GACTCGGGAAAGGTGCGTTA
ACADSB_-_124768497.23-P1P2	h1_supp5	ACADSB	P1P2	GCTTGCTCGGGTAACTCCCA
ACADSB_-_124768552.23-P1P2	h1_top5	ACADSB	P1P2	GGGCCTGCGGCGAGGATGGA
ACADS_+_121163619.23-P1P2	h1_supp5	ACADS	P1P2	GGCTGTTCCGGAGTGCTGGG
ACADS_+_121163685.23-P1P2	h1_top5	ACADS	P1P2	GCGAGCAGCGCGGCGGCCAT
ACADS_+_121163695.23-P1P2	h1_supp5	ACADS	P1P2	GGAGGCCCGGGCGAGCAGCG
ACADS_+_121163865.23-P1P2	h1_supp5	ACADS	P1P2	GGCAAGGAGCAGCAGAACTG
ACADS_+_121164027.23-P1P2	h1_supp5	ACADS	P1P2	Gcaggcctggctccggaaga
ACADS_+_121164090.23-P1P2	h1_top5	ACADS	P1P2	Ggccaaccgaggctgaggag
ACADS_-_121163653.23-P1P2	h1_top5	ACADS	P1P2	GCGGAACAGCGCGCTCGCAG
ACADS_-_121163657.23-P1P2	h1_top5	ACADS	P1P2	GACAGCGCGCTCGCAGCGGG
ACADS_-_121163671.23-P1P2	h1_top5	ACADS	P1P2	GGCGGGAGGTCGCGAAGCCT
ACADS_-_121163758.23-P1P2	h1_supp5	ACADS	P1P2	GAGTGCGCTGGGGATCCGTA
ACADVL_+_7123231.23-P1P2	h3_supp5	ACADVL	P1P2	GGTCCTGCACGCCCACGTCC
ACADVL_+_7123718.23-P1P2	h3_supp5	ACADVL	P1P2	GGCTGTGTCAAGGGGAGAAC
ACADVL_-_7123221.23-P1P2	h3_top5	ACADVL	P1P2	GCACTGTGGACGATGAGTCA
ACADVL_-_7123242.23-P1P2	h3_supp5	ACADVL	P1P2	GGTTAGGGGCGCCAGGACGT
ACADVL_-_7123283.23-P1P2	h3_top5	ACADVL	P1P2	GGGGTCAGAGCTCGAGCCAG
ACADVL_-_7123300.23-P1P2	h3_supp5	ACADVL	P1P2	GAGCGGCGCCCGGAGAGATT
ACADVL_-_7123392.23-P1P2	h3_supp5	ACADVL	P1P2	GGTGTGACAAGAGGGACGGT
ACADVL_-_7123639.23-P1P2	h3_top5	ACADVL	P1P2	GGCTCAGTCGCCGAAAGTAG
ACADVL_-_7123665.23-P1P2	h3_top5	ACADVL	P1P2	GGGCAAGCCAGGGTGCCCTA
ACADVL_-_7123677.23-P1P2	h3_top5	ACADVL	P1P2	GTGCCCTAGGGCGAAACTAG
ACAN_+_89346671.23-P1P2	h1_supp5	ACAN	P1P2	GGAGCggcggggaggtaggt
ACAN_+_89347050.23-P1P2	h1_supp5	ACAN	P1P2	GGAGCCTCGCTCTGGAGGGA
ACAN_+_89347054.23-P1P2	h1_supp5	ACAN	P1P2	GGGGAGAGCCTCGCTCTGGA
ACAN_+_89347058.23-P1P2	h1_supp5	ACAN	P1P2	GCCCTGGGAGAGCCTCGCTC
ACAN_+_89347139.23-P1P2	h1_top5	ACAN	P1P2	GAGCTCTAGGGCGGAGACCA
ACAN_+_89347148.23-P1P2	h1_top5	ACAN	P1P2	GGGCACACATAGCTCTAGGG
ACAN_+_89347151.23-P1P2	h1_top5	ACAN	P1P2	GCCCGGCACACATAGCTCTA
ACAN_-_89346701.23-P1P2	h1_top5	ACAN	P1P2	GctccccgccGCTCCAGAGG
ACAN_-_89346738.23-P1P2	h1_supp5	ACAN	P1P2	GACGCGCGCAGCGCTGCTCA
ACAN_-_89347101.23-P1P2	h1_top5	ACAN	P1P2	GCGCCCGGCGAGCCAGGAAC
ACAP1_+_7239854.23-P1P2	h4_top5	ACAP1	P1P2	GGCTCTCACCCCACACTTCC
ACAP1_+_7239897.23-P1P2	h4_supp5	ACAP1	P1P2	GGGCACAATTCTTTCCCCAA
ACAP1_+_7239925.23-P1P2	h4_supp5	ACAP1	P1P2	GGAGGGACCTCCGCGGGGAA
ACAP1_+_7239956.23-P1P2	h4_top5	ACAP1	P1P2	GCCCAGGAAGGGGAGATGAG
ACAP1_+_7240302.23-P1P2	h4_supp5	ACAP1	P1P2	GGGGGTGAGGGAAACTGCAG
ACAP1_+_7240320.23-P1P2	h4_top5	ACAP1	P1P2	GGAGGGAATGCCAGCTCTAG
ACAP1_-_7239866.23-P1P2	h4_top5	ACAP1	P1P2	GCCAGCACTGCCTGGAAGTG
ACAP1_-_7240198.23-P1P2	h4_supp5	ACAP1	P1P2	GCAGGCCAGGTCTCCTTCCA
ACAP1_-_7240242.23-P1P2	h4_top5	ACAP1	P1P2	GGCGAGCCTGTGGGCCAAAG
ACAP1_-_7240264.23-P1P2	h4_supp5	ACAP1	P1P2	GTACCCCAGCTGTGAAAGCA
ACAP2_+_195163325.23-P1P2	h3_supp5	ACAP2	P1P2	GCGAGGGGCGACGAAGTGGC
ACAP2_+_195163701.23-P1P2	h3_supp5	ACAP2	P1P2	GCTGCTATGACCAGCGGGCG
ACAP2_+_195163707.23-P1P2	h3_top5	ACAP2	P1P2	GTCGCGGCTGCTATGACCAG
ACAP2_-_195163292.23-P1P2	h3_supp5	ACAP2	P1P2	GGGCGCTCCGCCCCGGCAGA
ACAP2_-_195163352.23-P1P2	h3_top5	ACAP2	P1P2	GACTTCGTCGCCCCTCGGGA
ACAP2_-_195163362.23-P1P2	h3_top5	ACAP2	P1P2	GCCCTCGGGAGGGCTCGGTG
ACAP2_-_195163382.23-P1P2	h3_supp5	ACAP2	P1P2	GGGACTGCAGTGCCCTCGCA
ACAP2_-_195163395.23-P1P2	h3_top5	ACAP2	P1P2	GCTCGCAGGGTGGGAAACGG
ACAP2_-_195163655.23-P1P2	h3_top5	ACAP2	P1P2	GGCTGGGACGCAGACGGCTA
ACAP2_-_195163749.23-P1P2	h3_supp5	ACAP2	P1P2	GAAGACGGCGACGACTAGTC
ACAP3_+_1242907.23-P1P2	h5_supp5	ACAP3	P1P2	GCGTGCGCGTGGGCAGCCGT
ACAP3_+_1243258.23-P1P2	h5_top5	ACAP3	P1P2	Gcgggcgggacgagcggtcc
ACAP3_+_1243301.23-P1P2	h5_supp5	ACAP3	P1P2	Ggcgcggcggcctcattccg
ACAP3_+_1243337.23-P1P2	h5_top5	ACAP3	P1P2	GGACGCTCCCCGGCGGTGAC
ACAP3_-_1242824.23-P1P2	h5_supp5	ACAP3	P1P2	GCCACGGACCCAGACGACCC
ACAP3_-_1242913.23-P1P2	h5_supp5	ACAP3	P1P2	GGACGGTCCCGAGGTGCCCA
ACAP3_-_1243095.23-P1P2	h5_top5	ACAP3	P1P2	GACCCCGCCGCCGGGCACAA
ACAP3_-_1243221.23-P1P2	h5_top5	ACAP3	P1P2	GCGGCGGCCGCGGCGCTCAC
ACAP3_-_1243228.23-P1P2	h5_supp5	ACAP3	P1P2	GCGCGGCGCTCACTGGCACG
ACAP3_-_1243235.23-P1P2	h5_top5	ACAP3	P1P2	GCTCACTGGCACGAGGACcg
ACAT1_+_107992288.23-P1P2	h1_top5	ACAT1	P1P2	GCTCCACAGGCGTAGACTAG
ACAT1_+_107992310.23-P1P2	h1_top5	ACAT1	P1P2	GGTCGCAGAGGGCTGAGTAT
ACAT1_+_107992321.23-P1P2	h1_top5	ACAT1	P1P2	GGCACAGCCATGGTCGCAGA
ACAT1_+_107992690.23-P1P2	h1_supp5	ACAT1	P1P2	GGGGCCAGCGCCAATCCTGG
ACAT1_+_107992693.23-P1P2	h1_supp5	ACAT1	P1P2	GGCCGGGCCAGCGCCAATCC
ACAT1_-_107992307.23-P1P2	h1_supp5	ACAT1	P1P2	GGGCCGCTAGTCTACGCCTG
ACAT1_-_107992336.23-P1P2	h1_supp5	ACAT1	P1P2	GACTCAGCCCTCTGCGACCA
ACAT1_-_107992364.23-P1P2	h1_top5	ACAT1	P1P2	GTGGCGGCACTTCTGCGCAG
ACAT1_-_107992702.23-P1P2	h1_supp5	ACAT1	P1P2	GCGGGCAGGACCGCCAGGAT
ACAT1_-_107992733.23-P1P2	h1_top5	ACAT1	P1P2	GGGCCTGAGCGGTGGGATCG
ACAT2_+_160183137.23-P1P2	h1_supp5	ACAT2	P1P2	GCCGCCGAGACGATGACCAC
ACAT2_+_160183421.23-P1P2	h1_supp5	ACAT2	P1P2	GGGAGAGGCAGGCCACGCGA
ACAT2_+_160183436.23-P1P2	h1_top5	ACAT2	P1P2	GCTACGCCAACCAATGGGAG
ACAT2_+_160183505.23-P1P2	h1_top5	ACAT2	P1P2	GCTGCCGCAGGCATTACCGA
ACAT2_-_160183042.23-P1P2	h1_supp5	ACAT2	P1P2	GCTACCTCAGGTCCCGCCCG
ACAT2_-_160183054.23-P1P2	h1_top5	ACAT2	P1P2	GCCGCCCGCGGCAGGCCTGT
ACAT2_-_160183095.23-P1P2	h1_top5	ACAT2	P1P2	GCTAGCTTGCAGGCAGCGCA
ACAT2_-_160183174.23-P1P2	h1_top5	ACAT2	P1P2	GCGGCGGCGCGGACCATCAT
ACAT2_-_160183545.23-P1P2	h1_supp5	ACAT2	P1P2	GCAGGGGCGGAACTGCTAGG
ACAT2_-_160183588.23-P1P2	h1_supp5	ACAT2	P1P2	GGGGTCGGGCTGTCACACAA
ACBD3_+_226374329.23-P1P2	h4_top5	ACBD3	P1P2	GGACTCGAGGTGTCCGTCGA
ACBD3_+_226374366.23-P1P2	h4_top5	ACBD3	P1P2	GCAGCAGCCGGAGATGGCGG
ACBD3_-_226373901.23-P1P2	h4_supp5	ACBD3	P1P2	GAAGGTTGCAGGCCCGTCAG
ACBD3_-_226373955.23-P1P2	h4_supp5	ACBD3	P1P2	GCTTCGGGTACCCCCAAGGA
ACBD3_-_226373992.23-P1P2	h4_top5	ACBD3	P1P2	GACCACAGCCCAGTATGAGT
ACBD3_-_226373998.23-P1P2	h4_supp5	ACBD3	P1P2	GGCCCAGTATGAGTGGGTGA
ACBD3_-_226374023.23-P1P2	h4_supp5	ACBD3	P1P2	GGTCTGGTCCAGTCACCCTG
ACBD3_-_226374064.23-P1P2	h4_supp5	ACBD3	P1P2	GTCCCGGGGCCGGGCAGAAG
ACBD3_-_226374403.23-P1P2	h4_top5	ACBD3	P1P2	GCTGCTGCACCTCCTCAGCG
ACBD3_-_226374411.23-P1P2	h4_top5	ACBD3	P1P2	GCCTCCTCAGCGGGGACAGA
ACBD4_+_43210021.23-P2	h6_top5	ACBD4	P2	GGAGACGGACTCACGAGCAG
ACBD4_+_43210042.23-P2	h6_top5	ACBD4	P2	GGAGGCTCGCCCGGACTAAG
ACBD4_+_43210060.23-P2	h6_top5	ACBD4	P2	GCCCTTGCGGCCAAGATCAG
ACBD4_+_43210408.23-P2	h6_top5	ACBD4	P2	GAGACTGTGGCTCTCCGAGG
ACBD4_+_43210421.23-P2	h6_supp5	ACBD4	P2	GTCCGTCAGCTCCGAGACTG
ACBD4_+_43213044.23-P1	h6_supp5	ACBD4	P1	GGCGGCTTCCTACTGACCCC
ACBD4_+_43213087.23-P1	h6_top5	ACBD4	P1	GCGCCCACTGCCAGGACACC
ACBD4_+_43213412.23-P1	h6_top5	ACBD4	P1	GCCCCCGGCACCATAAGCCA
ACBD4_-_43210055.23-P2	h6_top5	ACBD4	P2	GGTCCGTCTCCCCTTAGTCC
ACBD4_-_43210342.23-P2	h6_supp5	ACBD4	P2	GAGCGCGAACCCGAAGGGAT
ACBD4_-_43210377.23-P2	h6_supp5	ACBD4	P2	GAGGTTGGCAGTGACGTCAT
ACBD4_-_43210416.23-P2	h6_supp5	ACBD4	P2	GAGGCCAGGTGCTGCCCCCT
ACBD4_-_43210458.23-P2	h6_supp5	ACBD4	P2	GGACGGACCTGGGGAGCGTG
ACBD4_-_43213050.23-P1	h6_top5	ACBD4	P1	GCCGGCCCTGCTGGACCCCG
ACBD4_-_43213072.23-P1	h6_top5	ACBD4	P1	GTCAGTAGGAAGCCGCGGGG
ACBD4_-_43213075.23-P1	h6_top5	ACBD4	P1	GGTAGGAAGCCGCGGGGTGG
ACBD4_-_43213105.23-P1	h6_supp5	ACBD4	P1	GGACCCAGGTGTCCTGGCAG
ACBD4_-_43213242.23-P1	h6_supp5	ACBD4	P1	GCCTAAAGGAGGCGCATCTG
ACBD4_-_43213460.23-P1	h6_supp5	ACBD4	P1	GTGGAGGCCCCCTCACACGA
ACBD4_-_43213499.23-P1	h6_supp5	ACBD4	P1	GGCTCAAAAGTAGGGCCCCA
ACBD5_+_27529127.23-P1P2	h4_supp5	ACBD5	P1P2	GCTGTGTAGGAGCCATGTAG
ACBD5_+_27529290.23-P1P2	h4_supp5	ACBD5	P1P2	GGAGATCCGTGCACGAGACT
ACBD5_+_27529332.23-P1P2	h4_top5	ACBD5	P1P2	GTTGGGACCGGGGCCAACAC
ACBD5_+_27529682.23-P1P2	h4_top5	ACBD5	P1P2	GGGGTGTGGCTGCTCCGCCA
ACBD5_+_27529701.23-P1P2	h4_top5	ACBD5	P1P2	GCGGACTCCGGCGGAATGGG
ACBD5_+_27529710.23-P1P2	h4_top5	ACBD5	P1P2	GACTGACAGACGGACTCCGG
ACBD5_+_27529713.23-P1P2	h4_supp5	ACBD5	P1P2	GCGGACTGACAGACGGACTC
ACBD5_-_27529363.23-P1P2	h4_supp5	ACBD5	P1P2	GCCCCGGTCCCAAGGTCTGT
ACBD5_-_27529679.23-P1P2	h4_top5	ACBD5	P1P2	GGGAGCCGCTCTCCCACCCT
ACBD5_-_27529780.23-P1P2	h4_supp5	ACBD5	P1P2	GGAGTCACCGGAGGACCCAC
ACBD6_+_180471319.23-P1P2	h4_top5	ACBD6	P1P2	GTCAGGGGACGACTCCGGGG
ACBD6_+_180471324.23-P1P2	h4_supp5	ACBD6	P1P2	GTGAGCTCAGGGGACGACTC
ACBD6_+_180471354.23-P1P2	h4_top5	ACBD6	P1P2	GGGGCCATCACCGGCGACAG
ACBD6_+_180471478.23-P1P2	h4_supp5	ACBD6	P1P2	GGCTCGCGACCCAGACTGGT
ACBD6_+_180471539.23-P1P2	h4_supp5	ACBD6	P1P2	GAGGGAGCAGGGTCACGTGA
ACBD6_+_180471617.23-P1P2	h4_top5	ACBD6	P1P2	GGGAGGAGACCGGGTCGACT
ACBD6_-_180471311.23-P1P2	h4_supp5	ACBD6	P1P2	GCTCGATCTCAGGGCTATGG
ACBD6_-_180471491.23-P1P2	h4_supp5	ACBD6	P1P2	GAGGCCTGGCCCACCAGTCT
ACBD6_-_180471532.23-P1P2	h4_top5	ACBD6	P1P2	GTCGGACCCAAGCTCAGTCG
ACBD6_-_180471707.23-P1P2	h4_top5	ACBD6	P1P2	GCAACGGAACAGGAGTCGAG
ACBD7_+_15130458.23-P1P2	h3_supp5	ACBD7	P1P2	GAGGCAAGGCAGGAGCGCCG
ACBD7_+_15130520.23-P1P2	h3_top5	ACBD7	P1P2	GCGGCGAGCCAGGGCTCCCA
ACBD7_+_15130765.23-P1P2	h3_supp5	ACBD7	P1P2	GGCGAGAGGGGGCAGAGCAC
ACBD7_+_15130776.23-P1P2	h3_top5	ACBD7	P1P2	GAAGCGGTGGGTGCGAGAGG
ACBD7_-_15130379.23-P1P2	h3_top5	ACBD7	P1P2	GACACTAAGAGAGGTCCTGG
ACBD7_-_15130397.23-P1P2	h3_top5	ACBD7	P1P2	GGAGGTCCCAACGAGCGAAG
ACBD7_-_15130438.23-P1P2	h3_top5	ACBD7	P1P2	GCTCCCTCTCGGAGACGGAG
ACBD7_-_15130555.23-P1P2	h3_supp5	ACBD7	P1P2	GGCTCGCCGTCAGCAGGCAC
ACBD7_-_15130579.23-P1P2	h3_supp5	ACBD7	P1P2	GCGGTCTACACTGCCATCTG
ACBD7_-_15130633.23-P1P2	h3_supp5	ACBD7	P1P2	GCACCGCCGACCGCTCCCAG
ACCSL_+_44069556.23-ENST00000378832.1	h7_supp5	ACCSL	ENST00000378832.1	GTATCTTTACTGGCCTCTGA
ACCSL_+_44069616.23-ENST00000378832.1	h7_top5	ACCSL	ENST00000378832.1	GGGCCTCTCCTCTGACCAGA
ACCSL_+_44069971.23-ENST00000378832.1	h7_top5	ACCSL	ENST00000378832.1	GGATAGGTCGCGGTTGACAA
ACCSL_+_44069981.23-ENST00000378832.1	h7_top5	ACCSL	ENST00000378832.1	GCCCACGGATGGATAGGTCG
ACCSL_+_44069992.23-ENST00000378832.1	h7_supp5	ACCSL	ENST00000378832.1	GGAGATGTCAATCCCACGGA
ACCSL_-_44069582.23-ENST00000378832.1	h7_top5	ACCSL	ENST00000378832.1	GAGAGGCCAGTAAAGATACC
ACCSL_-_44069740.23-ENST00000378832.1	h7_supp5	ACCSL	ENST00000378832.1	GTGCAGCTGACGAGCAGACA
ACCSL_-_44069759.23-ENST00000378832.1	h7_supp5	ACCSL	ENST00000378832.1	GGGGCCTGTCGCTGGAGGAA
ACCSL_-_44069772.23-ENST00000378832.1	h7_supp5	ACCSL	ENST00000378832.1	GGAGGAAAGGAGGCACACTG
ACCSL_-_44069930.23-ENST00000378832.1	h7_top5	ACCSL	ENST00000378832.1	GGCAGAGGGCCCAACTCTCT
ACCS_+_44087946.23-P1P2	h1_top5	ACCS	P1P2	GCAAGGGATTCGAGATGGAA
ACCS_+_44088025.23-P1P2	h1_supp5	ACCS	P1P2	GGAAACGGCCTTCTACAGGG
ACCS_+_44088028.23-P1P2	h1_top5	ACCS	P1P2	GACCGAAACGGCCTTCTACA
ACCS_+_44088070.23-P1P2	h1_supp5	ACCS	P1P2	GGCCTTGGAATCCCGCAAGT
ACCS_+_44088091.23-P1P2	h1_top5	ACCS	P1P2	GCAGATACCCGCACTCGATG
ACCS_+_44088215.23-P1P2	h1_top5	ACCS	P1P2	GACAGCCCAGGTCCGAGGAA
ACCS_+_44088290.23-P1P2	h1_supp5	ACCS	P1P2	GCTCCGCAAAGTCTTCTCAG
ACCS_-_44088081.23-P1P2	h1_supp5	ACCS	P1P2	GCGGTAGCCGCCCCACTTGC
ACCS_-_44088090.23-P1P2	h1_top5	ACCS	P1P2	GCCCCACTTGCGGGATTCCA
ACCS_-_44088106.23-P1P2	h1_supp5	ACCS	P1P2	GCCAAGGCCTCATCGAGTGC
ACD_+_67693727.23-P1P2	h5_supp5	ACD	P1P2	GGCGGGCCTTGTGTTCAGGT
ACD_+_67693748.23-P1P2	h5_top5	ACD	P1P2	GCGGCAGGAGAGCGCGAGGT
ACD_+_67694105.23-P1P2	h5_supp5	ACD	P1P2	GGGGGATGGCAGGTTCGGGG
ACD_+_67694124.23-P1P2	h5_top5	ACD	P1P2	GATCCGCTGGGTGTAGCCGT
ACD_-_67693904.23-P1P2	h5_top5	ACD	P1P2	GCCGACGTCGGACGTATCAG
ACD_-_67693954.23-P1P2	h5_supp5	ACD	P1P2	GGGCGTCCTGTAGTACCTGA
ACD_-_67693957.23-P1P2	h5_top5	ACD	P1P2	GGTCCTGTAGTACCTGACGG
ACD_-_67694092.23-P1P2	h5_supp5	ACD	P1P2	GGAATCAGCTCCCGAATCCA
ACD_-_67694143.23-P1P2	h5_top5	ACD	P1P2	GTCCCCACGGCTACACCCAG
ACD_-_67694152.23-P1P2	h5_supp5	ACD	P1P2	GCTACACCCAGCGGATGCAA
ACE2_+_15618824.23-P1P2	h1_supp5	ACE2	P1P2	GGAGTTCTCATGGCTCTATT
ACE2_+_15618847.23-P1P2	h1_supp5	ACE2	P1P2	GGAAGAGAATGTCCAAAACA
ACE2_+_15619016.23-P1P2	h1_top5	ACE2	P1P2	GGACGATGTCAAGCTCTTCC
ACE2_+_15619047.23-P1P2	h1_supp5	ACE2	P1P2	GCATTCAGTGGATGTGATCT
ACE2_+_15619087.23-P1P2	h1_top5	ACE2	P1P2	GGAGAGAAAATCTCATGAGG
ACE2_-_15618591.23-P1P2	h1_supp5	ACE2	P1P2	GCTGACTGTGATGAGAATTA
ACE2_-_15618594.23-P1P2	h1_top5	ACE2	P1P2	GACTGTGATGAGAATTATGG
ACE2_-_15618975.23-P1P2	h1_top5	ACE2	P1P2	GGTCTTGGCCTGTTCCTCAA
ACE2_-_15618978.23-P1P2	h1_supp5	ACE2	P1P2	GTTGGCCTGTTCCTCAATGG
ACE2_-_15619013.23-P1P2	h1_top5	ACE2	P1P2	GTACAGCAACAAGGCTGAGA
ACER1_+_6333110.23-P1P2	h3_top5	ACER1	P1P2	Gggtgcccctgagctagagg
ACER1_+_6333137.23-P1P2	h3_top5	ACER1	P1P2	Gaggcagctgtggtaggggg
ACER1_+_6333164.23-P1P2	h3_top5	ACER1	P1P2	Ggcgatggtgccttcttgga
ACER1_+_6333525.23-P1P2	h3_supp5	ACER1	P1P2	GGCCTATCAGAGCTCCGAGG
ACER1_-_6333127.23-P1P2	h3_supp5	ACER1	P1P2	Gcccaccccctctagctcag
ACER1_-_6333176.23-P1P2	h3_supp5	ACER1	P1P2	Ggcctctgtgccctccaaga
ACER1_-_6333413.23-P1P2	h3_supp5	ACER1	P1P2	Gccagtaaggctgtatgggg
ACER1_-_6333545.23-P1P2	h3_top5	ACER1	P1P2	GTCCACCTCGGAGCTCTGAT
ACER1_-_6333558.23-P1P2	h3_top5	ACER1	P1P2	GTCTGATAGGCGAAGATGCT
ACER1_-_6333623.23-P1P2	h3_supp5	ACER1	P1P2	GAGAGAAGGCGAGCTTGGGA
ACER2_+_19409007.23-P1P2	h3_top5	ACER2	P1P2	GCTGCTGCGGAGGCAAAACG
ACER2_+_19409248.23-P1P2	h3_top5	ACER2	P1P2	GGTCCAGCTTCCAGACGCTG
ACER2_+_19409371.23-P1P2	h3_supp5	ACER2	P1P2	GAGCTGTCGGGAATGGGGAC
ACER2_+_19409376.23-P1P2	h3_top5	ACER2	P1P2	GAGCCCAGCTGTCGGGAATG
ACER2_+_19409383.23-P1P2	h3_top5	ACER2	P1P2	GGAAGATGAGCCCAGCTGTC
ACER2_+_19409433.23-P1P2	h3_supp5	ACER2	P1P2	GGGGGGCCAAACAAGACAAT
ACER2_+_19409493.23-P1P2	h3_supp5	ACER2	P1P2	GCCCCCAGCTGACCCAAACA
ACER2_-_19409274.23-P1P2	h3_supp5	ACER2	P1P2	GGCGTCTGGAAGCTGGACGT
ACER2_-_19409294.23-P1P2	h3_supp5	ACER2	P1P2	GGGTCTCTGCGCGCATCTGG
ACER2_-_19409474.23-P1P2	h3_top5	ACER2	P1P2	GCCACGCGTCCAGGAACCAG
ACER3_+_76571969.23-P1P2	h4_top5	ACER3	P1P2	GCCGCTCACTGTGCCGGGTT
ACER3_+_76572444.23-P1P2	h4_supp5	ACER3	P1P2	GCTGGCCCCACTCCGCTCTC
ACER3_-_76571770.23-P1P2	h4_supp5	ACER3	P1P2	GCCCGCCCAAGGGTGAAGAG
ACER3_-_76571978.23-P1P2	h4_top5	ACER3	P1P2	GccTGGTCGCCAGCCTAACC
ACER3_-_76572000.23-P1P2	h4_top5	ACER3	P1P2	GCACAGTGAGCGGAGCGCCT
ACER3_-_76572003.23-P1P2	h4_top5	ACER3	P1P2	GAGTGAGCGGAGCGCCTGGG
ACER3_-_76572006.23-P1P2	h4_supp5	ACER3	P1P2	GGAGCGGAGCGCCTGGGCGG
ACER3_-_76572045.23-P1P2	h4_supp5	ACER3	P1P2	GCTCCGGCCGCGGACCGAGA
ACER3_-_76572313.23-P1P2	h4_supp5	ACER3	P1P2	GGAGTCCAGTGTGTAGAGGG
ACER3_-_76572404.23-P1P2	h4_top5	ACER3	P1P2	GGAGCCCCTGCTGGACCTAA
ACE_+_61554448.23-P1	h1_top5	ACE	P1	GcgaggcggcccccATGACG
ACE_+_61554534.23-P1	h1_supp5	ACE	P1	GAGCCCGGGGTCCAACGCCA
ACE_+_61554651.23-P1	h1_supp5	ACE	P1	GGTGTCGTGCGCCCAGCTGG
ACE_+_61554816.23-P1	h1_supp5	ACE	P1	GCTGTCGGGGCGAGGGTCCG
ACE_+_61554829.23-P1	h1_top5	ACE	P1	GGCCCCGCGGCTGACTGTCG
ACE_+_61562226.23-P2	h1_supp5	ACE	P2	GGTAGCCCAACCCTGGCCCA
ACE_+_61562272.23-P2	h1_top5	ACE	P2	GGTGCCCGTAGCAGAGCAGC
ACE_+_61562293.23-P2	h1_top5	ACE	P2	GCTGGCTGGGGACCAGCAGA
ACE_+_61562404.23-P2	h1_supp5	ACE	P2	GTGGGCTCTGGGCTGATGTC
ACE_+_61562589.23-P2	h1_supp5	ACE	P2	GCATCAGTCACCAGGTCTGT
ACE_-_61554428.23-P1	h1_top5	ACE	P1	GGGCCGCGGCGCAGGAGAAG
ACE_-_61554458.23-P1	h1_top5	ACE	P1	GAGCACCGCGCACCGCGTCA
ACE_-_61554461.23-P1	h1_top5	ACE	P1	GACCGCGCACCGCGTCATgg
ACE_-_61554901.23-P1	h1_supp5	ACE	P1	GGCTCCCAGCATGCACGAGT
ACE_-_61554915.23-P1	h1_supp5	ACE	P1	GCGAGTTGGATGGATGAGGG
ACE_-_61562238.23-P2	h1_top5	ACE	P2	GCTCCTGCGGCCATGGGCCA
ACE_-_61562443.23-P2	h1_top5	ACE	P2	GCCCAAGTGGGACCATGCAG
ACE_-_61562505.23-P2	h1_supp5	ACE	P2	GGGGACAGGGCAGGGTACAA
ACE_-_61562601.23-P2	h1_supp5	ACE	P2	GGCACTCTGTCCCACAGACC
ACE_-_61562661.23-P2	h1_top5	ACE	P2	GTATGACCGGACATCCCAGG
ACHE_+_100493137.23-P1	h1_supp5	ACHE	P1	GCCGATCGCTCCCTAGTCCG
ACHE_+_100493329.23-P1	h1_supp5	ACHE	P1	GCCAGGCCCCCCTAACGGGA
ACHE_+_100493456.23-P1	h1_top5	ACHE	P1	GATCGGCCGCCTCCAGCTcc
ACHE_+_100493473.23-P1	h1_top5	ACHE	P1	GAGCCTGCGCCGGGGAACAT
ACHE_+_100494559.23-P2	h1_top5	ACHE	P2	GCTCCCACGCGGGGTCTCGG
ACHE_+_100494570.23-P2	h1_top5	ACHE	P2	GCGCCGGCCGCTCTCCCACG
ACHE_+_100494596.23-P2	h1_supp5	ACHE	P2	GgcgcacgcacgcccgACGC
ACHE_-_100493040.23-P1	h1_supp5	ACHE	P1	GTCTGCGGGGCGCTGCGCAG
ACHE_-_100493104.23-P1	h1_supp5	ACHE	P1	GCCGGGAACCTGCGCAGCTC
ACHE_-_100493122.23-P1	h1_top5	ACHE	P1	GCGGGTACCGCCCCAATTAG
ACHE_-_100493407.23-P1	h1_supp5	ACHE	P1	GCCTTAAGGAGAGTCCCGGG
ACHE_-_100493427.23-P1	h1_top5	ACHE	P1	GGGGGAGGGAGACTCACCTG
ACHE_-_100493486.23-P1	h1_top5	ACHE	P1	GGGAGGCGGCCGATGTTCCC
ACHE_-_100494233.23-P2	h1_top5	ACHE	P2	GCTGGGCGAGGCGCACTCCG
ACHE_-_100494236.23-P2	h1_top5	ACHE	P2	GGGCGAGGCGCACTCCGCGG
ACHE_-_100494326.23-P2	h1_supp5	ACHE	P2	GCGTCACCAGGGTCCGGTCG
ACHE_-_100494356.23-P2	h1_supp5	ACHE	P2	GCACCAGGCCTAGCATTCAT
ACHE_-_100494415.23-P2	h1_supp5	ACHE	P2	GGCCCCCAGCCTGCTCCGAG
ACHE_-_100494526.23-P2	h1_supp5	ACHE	P2	GTGCATGCGGCAATACCGCG
ACHE_-_100494578.23-P2	h1_top5	ACHE	P2	GAGCCCCCGAGACCCCGCGT
ACIN1_+_23540370.23-P2	h3_supp5	ACIN1	P2	GGGGATAAACAGCACTTCCA
ACIN1_+_23540783.23-P2	h3_supp5	ACIN1	P2	GCTCCCCCATCCGCACACAC
ACIN1_+_23563821.23-P1	h3_supp5	ACIN1	P1	GGGCGTTGCTGGCCTGAGGG
ACIN1_+_23563962.23-P1	h3_supp5	ACIN1	P1	GAGCGCGAGCCCAAATGGGA
ACIN1_+_23564097.23-P1	h3_supp5	ACIN1	P1	GCGGCGCAGGCGCAGTATCC
ACIN1_+_23564314.23-P1	h3_top5	ACIN1	P1	GAGTACCTCACGCAAGATGG
ACIN1_+_23564345.23-P1	h3_supp5	ACIN1	P1	GGAAGATGCCCGAAGCCGTC
ACIN1_-_23540292.23-P2	h3_top5	ACIN1	P2	GAGGAAGACGAAGGGAGCTA
ACIN1_-_23540315.23-P2	h3_supp5	ACIN1	P2	GGGCGGGGAAAAGGCATACA
ACIN1_-_23540722.23-P2	h3_top5	ACIN1	P2	GGTGGCTGGCTCTATTGTAT
ACIN1_-_23540725.23-P2	h3_supp5	ACIN1	P2	GGCTGGCTCTATTGTATTGG
ACIN1_-_23540730.23-P2	h3_top5	ACIN1	P2	GCTCTATTGTATTGGCGGAG
ACIN1_-_23540744.23-P2	h3_top5	ACIN1	P2	GCGGAGCGGCAGCGATCAGC
ACIN1_-_23540756.23-P2	h3_top5	ACIN1	P2	GGATCAGCCGGAGACATGCA
ACIN1_-_23540802.23-P2	h3_supp5	ACIN1	P2	GAGCCTGTGTGTGCGGATGG
ACIN1_-_23563847.23-P1	h3_top5	ACIN1	P1	GCTCAGGCCAGCAACGCCGT
ACIN1_-_23563913.23-P1	h3_top5	ACIN1	P1	GACAGATACAAACAAGGAGG
ACIN1_-_23564062.23-P1	h3_supp5	ACIN1	P1	GACCGTGCGCGCGGATCCAG
ACIN1_-_23564262.23-P1	h3_top5	ACIN1	P1	GTCCAGTGCGGCCTTCAGGT
ACIN1_-_23564284.23-P1	h3_top5	ACIN1	P1	GTCACCCGCAGCGCCTGAAG
ACKR2_+_42850956.23-P1P2	h6_top5	ACKR2	P1P2	Gtcccgtactgtatcctgaa
ACKR2_-_42850976.23-P1P2	h6_top5	ACKR2	P1P2	Gtcctttcaggatacagtac
ACKR2_-_42850987.23-P1P2	h6_supp5	ACKR2	P1P2	Gtacagtacgggatcctttc
ACKR2_-_42850992.23-P1P2	h6_top5	ACKR2	P1P2	Gtacgggatcctttctggaa
ACKR2_-_42851020.23-P1P2	h6_top5	ACKR2	P1P2	Gtatgagctgctattgaaca
ACKR2_-_42851024.23-P1P2	h6_supp5	ACKR2	P1P2	Gagctgctattgaacacggc
ACKR2_-_42851391.23-P1P2	h6_supp5	ACKR2	P1P2	Gtggggaagcttagaggttc
ACKR2_-_42851412.23-P1P2	h6_supp5	ACKR2	P1P2	Ggtttctgtaatcagccttg
ACKR2_-_42851475.23-P1P2	h6_supp5	ACKR2	P1P2	Ggagggtatgacagatagac
ACKR2_-_42851479.23-P1P2	h6_top5	ACKR2	P1P2	Ggtatgacagatagacagga
ACKR3_+_237476442.23-P2	h2_supp5	ACKR3	P2	GCAGGCGCCTGCGAGAATTC
ACKR3_+_237476473.23-P2	h2_top5	ACKR3	P2	GTCCGCACTCACGCACGGCC
ACKR3_+_237476736.23-P2	h2_supp5	ACKR3	P2	GGGACAGGATGCTAACGTAG
ACKR3_+_237476822.23-P2	h2_top5	ACKR3	P2	GCCCGGTGGAAACACAGAGT
ACKR3_+_237476887.23-P2	h2_supp5	ACKR3	P2	GGGCTGTAGCCGTGACTCCG
ACKR3_+_237478500.23-P1	h2_top5	ACKR3	P1	GTCCTGGCTGTGCTGTGCGC
ACKR3_+_237478916.23-P1	h2_top5	ACKR3	P1	GTCCCCATGCCAAATTGGTC
ACKR3_+_237478950.23-P1	h2_top5	ACKR3	P1	GAAGCAAAACAGGTAAACAG
ACKR3_-_237476457.23-P2	h2_supp5	ACKR3	P2	GCCGGGGCCAGAATTCTCGC
ACKR3_-_237476493.23-P2	h2_top5	ACKR3	P2	GGCCCGGCCGTGCGTGAGTG
ACKR3_-_237476505.23-P2	h2_top5	ACKR3	P2	GGTGAGTGCGGAACAAGTCT
ACKR3_-_237476881.23-P2	h2_supp5	ACKR3	P2	GTGCGGAGCGCGTTCTCTGA
ACKR3_-_237476900.23-P2	h2_top5	ACKR3	P2	GAGGACAGGCCCCGGAGTCA
ACKR3_-_237478572.23-P1	h2_supp5	ACKR3	P1	GcccagccagcccGGAGGTA
ACKR3_-_237478578.23-P1	h2_top5	ACKR3	P1	GcagcccGGAGGTAAGGAAA
ACKR3_-_237478586.23-P1	h2_supp5	ACKR3	P1	GAGGTAAGGAAACGGTGCTC
ACKR3_-_237478610.23-P1	h2_top5	ACKR3	P1	GGCAGCTCTGCTCGGAAAGA
ACKR3_-_237478615.23-P1	h2_supp5	ACKR3	P1	GTCTGCTCGGAAAGAAGGCA
ACKR3_-_237478884.23-P1	h2_supp5	ACKR3	P1	GTTTAAGCTCCAGTAAGCAG
ACKR3_-_237478929.23-P1	h2_supp5	ACKR3	P1	GCCATTCTGCCTGACCAATT
ACKR4_+_132316216.23-P1P2	h6_supp5	ACKR4	P1P2	GAGTAAATATACAAGATCTT
ACKR4_+_132316328.23-P1P2	h6_supp5	ACKR4	P1P2	GATATTAAGATTTTCATTTA
ACKR4_+_132316377.23-P1P2	h6_top5	ACKR4	P1P2	GAAGTTTTACCGACAAGTAA
ACKR4_+_132316545.23-P1P2	h6_supp5	ACKR4	P1P2	GGAGTAAAAAAGAGTAGAAA
ACKR4_-_132316111.23-P1P2	h6_top5	ACKR4	P1P2	GAACAAAAGTAGCTGGAGTT
ACKR4_-_132316167.23-P1P2	h6_top5	ACKR4	P1P2	GCCTCTCTGCCGACTACAAC
ACKR4_-_132316171.23-P1P2	h6_top5	ACKR4	P1P2	GTCTGCCGACTACAACAGGT
ACKR4_-_132316248.23-P1P2	h6_supp5	ACKR4	P1P2	GGTATATTTACTTATATAGA
ACKR4_-_132316406.23-P1P2	h6_supp5	ACKR4	P1P2	GTGTCGGTAAAACTTTGTTA
ACKR4_-_132316525.23-P1P2	h6_top5	ACKR4	P1P2	GTGTCTATATATCTGCCGGA
ACLY_+_40074710.23-P1P2	h3_supp5	ACLY	P1P2	GCGGGAAGTAGAGAAAGCGG
ACLY_+_40074807.23-P1P2	h3_top5	ACLY	P1P2	GGGCGCGCCTCACCCCTCCC
ACLY_+_40075121.23-P1P2	h3_top5	ACLY	P1P2	GCTTCGGCAGAGGTGAGCAC
ACLY_-_40074750.23-P1P2	h3_supp5	ACLY	P1P2	GCCGTCCCGGCATCCGATGG
ACLY_-_40074817.23-P1P2	h3_top5	ACLY	P1P2	GCGATAGCTGTGCCCGGGAG
ACLY_-_40075090.23-P1P2	h3_top5	ACLY	P1P2	GCGGAGGCAGGAAGCTCCTA
ACLY_-_40075168.23-P1P2	h3_supp5	ACLY	P1P2	GTGCGCGGCGCTTCTTCCAC
ACLY_-_40075192.23-P1P2	h3_supp5	ACLY	P1P2	GCGACGAACCCCGCAAAATC
ACLY_-_40075221.23-P1P2	h3_supp5	ACLY	P1P2	GCAGCAGCCGGTAGCTTCCC
ACLY_-_40075227.23-P1P2	h3_top5	ACLY	P1P2	GCCGGTAGCTTCCCGGGATC
ACMSD_+_135596183.23-P1P2	h6_top5	ACMSD	P1P2	GGAGACCTTTGTGAAAACTG
ACMSD_+_135596266.23-P1P2	h6_supp5	ACMSD	P1P2	GTTTTGGTAGAATATGACTA
ACMSD_-_135596118.23-P1P2	h6_supp5	ACMSD	P1P2	GGTTCTAATGGACCTAGACT
ACMSD_-_135596123.23-P1P2	h6_top5	ACMSD	P1P2	GAATGGACCTAGACTGGGTT
ACMSD_-_135596149.23-P1P2	h6_supp5	ACMSD	P1P2	GCCTACTGACTGCTGCCTGA
ACMSD_-_135596200.23-P1P2	h6_top5	ACMSD	P1P2	GAACTCCACAGTTTTCACAA
ACMSD_-_135596315.23-P1P2	h6_supp5	ACMSD	P1P2	GCCAGATCTAAAAAAGGTAA
ACMSD_-_135596354.23-P1P2	h6_top5	ACMSD	P1P2	GTATTTCTGAAACTTCTCCA
ACMSD_-_135596438.23-P1P2	h6_top5	ACMSD	P1P2	GGCGAGGGGGTTAAATCATT
ACMSD_-_135596683.23-P1P2	h6_supp5	ACMSD	P1P2	GAGTAGAAGACCATTAAAAA
ACN9_+_96747038.23-P1P2	h4_supp5	ACN9	P1P2	GCTCGAGAAACGTGCCGCCC
ACN9_+_96747061.23-P1P2	h4_supp5	ACN9	P1P2	GGACGCGCTTGTACAATGCC
ACN9_+_96747104.23-P1P2	h4_top5	ACN9	P1P2	GCCAGGGATTTGAGGTCCGG
ACN9_+_96747221.23-P1P2	h4_supp5	ACN9	P1P2	GAGGTCTTGGGCAAAGAGAA
ACN9_+_96747240.23-P1P2	h4_top5	ACN9	P1P2	GGGACACCGAGGAACCCCAA
ACN9_+_96747363.23-P1P2	h4_top5	ACN9	P1P2	GGCTCTAGTGAGAAACCCGT
ACN9_-_96747019.23-P1P2	h4_supp5	ACN9	P1P2	GTCTGCGCAGGCGCAGTCGG
ACN9_-_96747046.23-P1P2	h4_top5	ACN9	P1P2	GGTGGGGCGCTATGCCGGGG
ACN9_-_96747065.23-P1P2	h4_top5	ACN9	P1P2	GCGGCACGTTTCTCGAGTCC
ACN9_-_96747455.23-P1P2	h4_supp5	ACN9	P1P2	GGCAGATGCCAGGTGCTCAA
ACO1_+_32384680.23-P1P2	h3_top5	ACO1	P1P2	GGCGAACCTGACCCAAGCAG
ACO1_+_32384714.23-P1P2	h3_supp5	ACO1	P1P2	GCACCTCCGACTGCACGGCG
ACO1_+_32385057.23-P1P2	h3_top5	ACO1	P1P2	GGTGCGGGCCTCACACCCTC
ACO1_-_32384671.23-P1P2	h3_supp5	ACO1	P1P2	GCTGGAACCGCGCAGCGCAC
ACO1_-_32384696.23-P1P2	h3_supp5	ACO1	P1P2	GGCGTCCCGCTGCTTGGGTC
ACO1_-_32384733.23-P1P2	h3_top5	ACO1	P1P2	GAGCCCCGCCGTGCAGTCGG
ACO1_-_32384889.23-P1P2	h3_supp5	ACO1	P1P2	GGAGGCTGAGAGGAGAATCG
ACO1_-_32385047.23-P1P2	h3_top5	ACO1	P1P2	GAGGGTGTGCGGCCAGTCCT
ACO1_-_32385064.23-P1P2	h3_top5	ACO1	P1P2	GCTGGGAGTCCTAACCCCGA
ACO1_-_32385115.23-P1P2	h3_supp5	ACO1	P1P2	GAGGCCCGGCTGGCTGGATA
ACO2_+_41865203.23-P1P2	h2_top5	ACO2	P1P2	GCCCGCCCCCGTGAACCCAG
ACO2_+_41865228.23-P1P2	h2_top5	ACO2	P1P2	GCAGCCGCCGGCACAGTAGG
ACO2_+_41865231.23-P1P2	h2_supp5	ACO2	P1P2	GCCACAGCCGCCGGCACAGT
ACO2_+_41865345.23-P1P2	h2_top5	ACO2	P1P2	GCCGGGGACGCCTTGACCTA
ACO2_+_41865484.23-P1P2	h2_supp5	ACO2	P1P2	GGAATGGAAACACACCCCAC
ACO2_+_41865560.23-P1P2	h2_supp5	ACO2	P1P2	GAAGTGAGGCCTCAGGAACT
ACO2_-_41865209.23-P1P2	h2_top5	ACO2	P1P2	GGAGCGAGCTCAGGGACCTC
ACO2_-_41865357.23-P1P2	h2_supp5	ACO2	P1P2	GTCTCTGGTGCCCTAGGTCA
ACO2_-_41865534.23-P1P2	h2_top5	ACO2	P1P2	GTGAGGACAAGGTGACTAGG
ACO2_-_41865573.23-P1P2	h2_supp5	ACO2	P1P2	GCTTCTAGGCCCAGTTCCTG
ACOT11_+_55007947.23-P2	h4_top5	ACOT11	P2	GCTGCGGGCAGGCTGAAGGG
ACOT11_+_55007958.23-P2	h4_supp5	ACOT11	P2	GGAGGCGGGAAGCTGCGGGC
ACOT11_+_55007963.23-P2	h4_top5	ACOT11	P2	GAGCCAGAGGCGGGAAGCTG
ACOT11_+_55008024.23-P2	h4_supp5	ACOT11	P2	GCGTCCGGGGAGCGAGTCCG
ACOT11_+_55008184.23-P2	h4_supp5	ACOT11	P2	GGGTACAGGCTGATCTCCCC
ACOT11_+_55008406.23-P2	h4_top5	ACOT11	P2	GTCCGCAAATGAGTCAGCAG
ACOT11_+_55013888.23-P1	h4_top5	ACOT11	P1	GGACTCCAAATGAAGCCTGT
ACOT11_+_55013964.23-P1	h4_top5	ACOT11	P1	GTCATCGCGCCGGGTGGCCG
ACOT11_+_55013970.23-P1	h4_top5	ACOT11	P1	GTCTGGATCATCGCGCCGGG
ACOT11_+_55014110.23-P1	h4_supp5	ACOT11	P1	GATGGCCCGTGGAGAGTGTG
ACOT11_-_55008004.23-P2	h4_top5	ACOT11	P2	GCTGGGCTCGGGGACCTCGG
ACOT11_-_55008353.23-P2	h4_supp5	ACOT11	P2	GCTGGCCCGGCGCGCCGCAG
ACOT11_-_55008376.23-P2	h4_top5	ACOT11	P2	GTGGCTCCGGAGAAGACCTG
ACOT11_-_55008399.23-P2	h4_supp5	ACOT11	P2	GCGCAAGACTCAGAGGCCAG
ACOT11_-_55013905.23-P1	h4_supp5	ACOT11	P1	GGAGGCCCACAGGCTTCATT
ACOT11_-_55013950.23-P1	h4_top5	ACOT11	P1	GGTGACCAGCTTGTGTCTCT
ACOT11_-_55014024.23-P1	h4_supp5	ACOT11	P1	GCACCTGCGACGGGTATGGA
ACOT11_-_55014173.23-P1	h4_supp5	ACOT11	P1	GGAGAAATCGCAGAACCCCT
ACOT11_-_55014234.23-P1	h4_top5	ACOT11	P1	GGGGCTGTCAGATCCCCCAC
ACOT11_-_55014292.23-P1	h4_supp5	ACOT11	P1	GCGGCCTCTGGAATTCTATT
ACOT12_+_80689507.23-P1P2	h4_supp5	ACOT12	P1P2	GTGTTGTTGAGctctctccc
ACOT12_+_80689555.23-P1P2	h4_supp5	ACOT12	P1P2	GAGCCCAGAGAGCTTCTGCG
ACOT12_+_80689628.23-P1P2	h4_top5	ACOT12	P1P2	GTGGGCATGGCCGAGACCGG
ACOT12_+_80689672.23-P1P2	h4_top5	ACOT12	P1P2	GCCTGCGCAGCCAGGGATAG
ACOT12_+_80689920.23-P1P2	h4_supp5	ACOT12	P1P2	GGCCCTGGCCATGGAGCGGC
ACOT12_+_80689929.23-P1P2	h4_top5	ACOT12	P1P2	GAGCGCTCTCGCCCTGGCCA
ACOT12_+_80689961.23-P1P2	h4_supp5	ACOT12	P1P2	GGGGCATGGTGGGGTGTCGG
ACOT12_-_80689574.23-P1P2	h4_top5	ACOT12	P1P2	GAACCCCGCAGAAGCTCTCT
ACOT12_-_80689897.23-P1P2	h4_top5	ACOT12	P1P2	GGTGCGCCGGCTGGATGGCT
ACOT12_-_80689916.23-P1P2	h4_supp5	ACOT12	P1P2	GTGGCTCATGACCACCTCGC
ACOT13_+_24667341.23-P1P2	h1_top5	ACOT13	P1P2	GGCGCAAGAGGCCGGGAGTC
ACOT13_+_24667625.23-P1P2	h1_supp5	ACOT13	P1P2	GCTCACAACGGCACCAAGCA
ACOT13_-_24667290.23-P1P2	h1_supp5	ACOT13	P1P2	GCATGCGCGCTTCGTCACAA
ACOT13_-_24667329.23-P1P2	h1_top5	ACOT13	P1P2	GAGCAAATCGCGGACCACCG
ACOT13_-_24667371.23-P1P2	h1_top5	ACOT13	P1P2	GCGGCCTCTTGCGCTCCTAG
ACOT13_-_24667374.23-P1P2	h1_supp5	ACOT13	P1P2	GCCTCTTGCGCTCCTAGGGG
ACOT13_-_24667386.23-P1P2	h1_top5	ACOT13	P1P2	GCTAGGGGCGGAGAAGGGTG
ACOT13_-_24667473.23-P1P2	h1_top5	ACOT13	P1P2	GGTTCTTGCGCAAAGCCCAA
ACOT13_-_24667530.23-P1P2	h1_supp5	ACOT13	P1P2	GTCTCTGCGGGAGGTGATAA
ACOT13_-_24667815.23-P1P2	h1_supp5	ACOT13	P1P2	GACTCGTGGAGACAGTTCCA
ACOT1_+_74003818.23-P1P2	h4_top5	ACOT1	P1P2	GGGCCAGGACTGGTTCgtcc
ACOT1_+_74003838.23-P1P2	h4_supp5	ACOT1	P1P2	GCTGGCTCGCGGAATGGGCT
ACOT1_+_74003843.23-P1P2	h4_top5	ACOT1	P1P2	GGCTTGCTGGCTCGCGGAAT
ACOT1_+_74004100.23-P1P2	h4_top5	ACOT1	P1P2	GAGCAGGAACCCAAATAATC
ACOT1_-_74004062.23-P1P2	h4_top5	ACOT1	P1P2	GCAGCCCGAGAGGAAGAGTT
ACOT1_-_74004076.23-P1P2	h4_top5	ACOT1	P1P2	GGAGTTGGGCAGAGTTGCAG
ACOT1_-_74004103.23-P1P2	h4_supp5	ACOT1	P1P2	GACAGCTGAGGCAGTTTGGC
ACOT1_-_74004113.23-P1P2	h4_supp5	ACOT1	P1P2	GCAGTTTGGCCGGATTATTT
ACOT1_-_74004496.23-P1P2	h4_supp5	ACOT1	P1P2	GGCGGCTGCTGTGCCGGGTG
ACOT1_-_74004524.23-P1P2	h4_supp5	ACOT1	P1P2	GCGCTACTTCCTCCCGCCCG
ACOT2_+_74035740.23-P1P2	h3_top5	ACOT2	P1P2	GTCAGAAGCTTGCTGGCCTG
ACOT2_+_74035970.23-P1P2	h3_top5	ACOT2	P1P2	GCCTGAGAACAACTGAATGG
ACOT2_+_74036024.23-P1P2	h3_top5	ACOT2	P1P2	GGTACAGCCGGGACGCTCGA
ACOT2_+_74036035.23-P1P2	h3_supp5	ACOT2	P1P2	GAGGCTCCATTGGTACAGCC
ACOT2_+_74036054.23-P1P2	h3_supp5	ACOT2	P1P2	GGAACTGCGCCGAACTCTTC
ACOT2_-_74036039.23-P1P2	h3_supp5	ACOT2	P1P2	GTGCTGTCCTTCGAGCGTCC
ACOT2_-_74036051.23-P1P2	h3_top5	ACOT2	P1P2	GAGCGTCCCGGCTGTACCAA
ACOT2_-_74036080.23-P1P2	h3_supp5	ACOT2	P1P2	GAGAGTTCGGCGCAGTTCCT
ACOT2_-_74036118.23-P1P2	h3_supp5	ACOT2	P1P2	GCAGGTTGGTCAGATCATTA
ACOT2_-_74036501.23-P1P2	h3_top5	ACOT2	P1P2	GGCGGCTGCTGTGCCAGACG
ACOT4_+_74058581.23-P1P2	h3_supp5	ACOT4	P1P2	GAGCGCGCCGAATGTCCGGA
ACOT4_+_74058635.23-P1P2	h3_top5	ACOT4	P1P2	GGCCGGAGCGGGGAATTCAA
ACOT4_+_74058647.23-P1P2	h3_top5	ACOT4	P1P2	GTGACATCTTGGAGCCGGAG
ACOT4_+_74058687.23-P1P2	h3_supp5	ACOT4	P1P2	GTCCAGCAGCAGCGGCCTGG
ACOT4_+_74058910.23-P1P2	h3_top5	ACOT4	P1P2	GAAAGGCTTCTCGGGTTCCA
ACOT4_+_74058918.23-P1P2	h3_top5	ACOT4	P1P2	GAGCGCCAAAAAGGCTTCTC
ACOT4_+_74059053.23-P1P2	h3_supp5	ACOT4	P1P2	GACTGGCGCCGCACCCCTGG
ACOT4_+_74059070.23-P1P2	h3_supp5	ACOT4	P1P2	GCCGGCCCGCTCGCACCGAC
ACOT4_-_74059158.23-P1P2	h3_supp5	ACOT4	P1P2	GCGGGTGGTGTGAGCGTCAG
ACOT4_-_74059268.23-P1P2	h3_top5	ACOT4	P1P2	GGCCACTCTACCAAAATAGA
ACOT6_+_74077704.23-P1P2	h2_top5	ACOT6	P1P2	Gacagaagcctaagaatcat
ACOT6_+_74077926.23-P1P2	h2_top5	ACOT6	P1P2	GAGCTGGGAACATAGCAGGG
ACOT6_+_74078053.23-P1P2	h2_top5	ACOT6	P1P2	GCTTTTTTAGAAGGAACCTA
ACOT6_+_74078097.23-P1P2	h2_supp5	ACOT6	P1P2	GATCTGAAGGTTCAAGGGAA
ACOT6_+_74078110.23-P1P2	h2_supp5	ACOT6	P1P2	GTGTAGAACCCTGAATCTGA
ACOT6_-_74077642.23-P1P2	h2_supp5	ACOT6	P1P2	Gagggcagctgcagtgcaag
ACOT6_-_74077963.23-P1P2	h2_supp5	ACOT6	P1P2	GCCAGCTAGGTTGAGCTGTG
ACOT6_-_74077984.23-P1P2	h2_top5	ACOT6	P1P2	Ggttgggtttggccaaagag
ACOT6_-_74078059.23-P1P2	h2_top5	ACOT6	P1P2	GccttcctgccACAAACCAT
ACOT6_-_74078124.23-P1P2	h2_supp5	ACOT6	P1P2	GCCTTGAACCTTCAGATTCA
ACOT7_+_6453356.23-P1P2	h3_top5	ACOT7	P1P2	GGCCGCAGCCCCCAGCATGT
ACOT7_-_6453209.23-P1P2	h3_supp5	ACOT7	P1P2	GAGGCCGTGCGGGGAATCGG
ACOT7_-_6453318.23-P1P2	h3_supp5	ACOT7	P1P2	GCGCGCGGGCCCTCTCTTAC
ACOT7_-_6453331.23-P1P2	h3_supp5	ACOT7	P1P2	GTCTTACCGGCAGATCTGGA
ACOT7_-_6453334.23-P1P2	h3_top5	ACOT7	P1P2	GTACCGGCAGATCTGGATGG
ACOT7_-_6453354.23-P1P2	h3_supp5	ACOT7	P1P2	GGGACGGCGTCTCGACGTCT
ACOT7_-_6453369.23-P1P2	h3_top5	ACOT7	P1P2	GGTCTGGGCCCGACATGCTG
ACOT7_-_6453388.23-P1P2	h3_top5	ACOT7	P1P2	GGGGGCTGCGGCGGCGGATG
ACOT7_-_6453406.23-P1P2	h3_top5	ACOT7	P1P2	GGCGGCGGGCGGCTGCAGAA
ACOT7_-_6453466.23-P1P2	h3_supp5	ACOT7	P1P2	GCCGGGCCGCGCCATAAAGG
ACOT8_+_44485553.23-P1P2	h3_top5	ACOT8	P1P2	Gctgccctaagccttcacgg
ACOT8_+_44485579.23-P1P2	h3_supp5	ACOT8	P1P2	GTgacctgagagaccctgct
ACOT8_+_44485987.23-P1P2	h3_supp5	ACOT8	P1P2	GTATGTCTCCGCGTCTTCCG
ACOT8_+_44486016.23-P1P2	h3_top5	ACOT8	P1P2	GGCAATCTGCCGGAAGAGTC
ACOT8_+_44486037.23-P1P2	h3_supp5	ACOT8	P1P2	GAGGAGACTTCCGGTTACTA
ACOT8_-_44485597.23-P1P2	h3_top5	ACOT8	P1P2	Gctgccgagcagggtctctc
ACOT8_-_44485644.23-P1P2	h3_supp5	ACOT8	P1P2	GCAGACCTCGCAGCGCGGAG
ACOT8_-_44485808.23-P1P2	h3_supp5	ACOT8	P1P2	GCCCTAAAGGAGGGGATGCT
ACOT8_-_44485992.23-P1P2	h3_top5	ACOT8	P1P2	GGCCCTGCACACCCGCTCCG
ACOT8_-_44486001.23-P1P2	h3_top5	ACOT8	P1P2	GACCCGCTCCGCGGAAGACG
ACOT9_+_23761133.23-P1P2	h4_top5	ACOT9	P1P2	GGAAGAAGTGGGCCACGCAT
ACOT9_+_23761144.23-P1P2	h4_supp5	ACOT9	P1P2	GTGGCCCCGGCGGAAGAAGT
ACOT9_+_23761350.23-P1P2	h4_top5	ACOT9	P1P2	GCCTCAGCAAGGGCGCGGTC
ACOT9_+_23761355.23-P1P2	h4_supp5	ACOT9	P1P2	GGCTGTCCTCAGCAAGGGCG
ACOT9_+_23761360.23-P1P2	h4_top5	ACOT9	P1P2	GCCCGGGCTGTCCTCAGCAA
ACOT9_-_23760942.23-P1P2	h4_supp5	ACOT9	P1P2	GGCGGCTACCAACCACACCC
ACOT9_-_23761181.23-P1P2	h4_supp5	ACOT9	P1P2	GGGGCCAGCCCGAAGCTCTA
ACOT9_-_23761296.23-P1P2	h4_supp5	ACOT9	P1P2	GGTGCGCGCGATGGAGAACC
ACOT9_-_23761316.23-P1P2	h4_top5	ACOT9	P1P2	GGGCCCCGCGCGCTAGTCGG
ACOT9_-_23761394.23-P1P2	h4_top5	ACOT9	P1P2	GCAGCCCGGGAGCCGGACAG
ACOX1_+_73974830.23-P1P2	h1_supp5	ACOX1	P1P2	GGCCTATTGTGATTCAGGGA
ACOX1_+_73975184.23-P1P2	h1_supp5	ACOX1	P1P2	GTTGTCACTGCCACCTCGGT
ACOX1_+_73975227.23-P1P2	h1_top5	ACOX1	P1P2	GCTGCCTCCTAGGGTCCGGC
ACOX1_+_73975249.23-P1P2	h1_supp5	ACOX1	P1P2	GGGGGACTTGCGCCGTCCTG
ACOX1_-_73974792.23-P1P2	h1_supp5	ACOX1	P1P2	GTCTCTGAAAGGGGGTTAAA
ACOX1_-_73974876.23-P1P2	h1_supp5	ACOX1	P1P2	GAGAGTCGCGGACACACCTG
ACOX1_-_73975169.23-P1P2	h1_top5	ACOX1	P1P2	GGTTCATGGCGACGACCAGC
ACOX1_-_73975193.23-P1P2	h1_top5	ACOX1	P1P2	GGCGAAGTAAGCACCGACCG
ACOX1_-_73975196.23-P1P2	h1_top5	ACOX1	P1P2	GAAGTAAGCACCGACCGAGG
ACOX1_-_73975245.23-P1P2	h1_top5	ACOX1	P1P2	GGCGCCGGCCGGACCCTAGG
ACOX2_+_58512259.23-P2	h4_supp5	ACOX2	P2	GCTGAGTGGCCTGCCATCAC
ACOX2_+_58512291.23-P2	h4_supp5	ACOX2	P2	GGCAGGGCCTGTGGCGGACA
ACOX2_+_58512428.23-P2	h4_top5	ACOX2	P2	GTGCACAGGGTTGGTCCCTA
ACOX2_+_58512441.23-P2	h4_top5	ACOX2	P2	GGCTCAGTAAGTGGTGCACA
ACOX2_+_58522495.23-P1	h4_supp5	ACOX2	P1	Ggggcttggggttttaaaga
ACOX2_+_58522520.23-P1	h4_top5	ACOX2	P1	Gggaggacagggaatgccgg
ACOX2_+_58522693.23-P1	h4_supp5	ACOX2	P1	Gggccctgcactaagtgtta
ACOX2_+_58522852.23-P1	h4_top5	ACOX2	P1	GAGTGCGGACACAGGACAGA
ACOX2_+_58522860.23-P1	h4_top5	ACOX2	P1	GCGGCCTACAGTGCGGACAC
ACOX2_+_58522888.23-P1	h4_top5	ACOX2	P1	GGCGGCCTACAGCCGGGGAG
ACOX2_+_58522893.23-P1	h4_top5	ACOX2	P1	GAGGCTGCGGCCTACAGCCG
ACOX2_-_58512038.23-P2	h4_top5	ACOX2	P2	GgaggatggtggcctagaAG
ACOX2_-_58512043.23-P2	h4_top5	ACOX2	P2	GtggtggcctagaAGTGGAT
ACOX2_-_58512058.23-P2	h4_supp5	ACOX2	P2	GGGATAGGTTAGTCATACTG
ACOX2_-_58512157.23-P2	h4_supp5	ACOX2	P2	GAAGCTTGGTGGGTCCCCAA
ACOX2_-_58512421.23-P2	h4_supp5	ACOX2	P2	GGGGGTTGGGCGGTGTTAGG
ACOX2_-_58512435.23-P2	h4_top5	ACOX2	P2	GTTAGGGGGCCTCCACCATA
ACOX2_-_58522790.23-P1	h4_supp5	ACOX2	P1	GGCGGACAGGGTCATCATGG
ACOX2_-_58522878.23-P1	h4_supp5	ACOX2	P1	GTGTCCTGTGTCCGCACTGT
ACOX2_-_58522905.23-P1	h4_supp5	ACOX2	P1	GCTGGCCTCTCCCCGGCTGT
ACOX3_+_8429824.23-P1	h4_supp5	ACOX3	P1	GTAGGCAGCTGTTCACGAAA
ACOX3_+_8430042.23-P1	h4_supp5	ACOX3	P1	GTGCAGAGCAGCGAGGACCG
ACOX3_+_8430113.23-P1	h4_top5	ACOX3	P1	GTAGTCCCAGTACTCCGAGT
ACOX3_+_8430140.23-P1	h4_top5	ACOX3	P1	GCAGAGACAGCTGCGCTGTG
ACOX3_+_8430181.23-P1	h4_supp5	ACOX3	P1	GCGGAGGCCGAGAGGCGTGG
ACOX3_+_8430200.23-P1	h4_supp5	ACOX3	P1	GGCCCCGCCCATGGGACGGA
ACOX3_+_8442240.23-P2	h4_supp5	ACOX3	P2	GTGATTACCGATAAAAGTCA
ACOX3_+_8442373.23-P2	h4_top5	ACOX3	P2	GGTTGAACTGTGGAGTGTGT
ACOX3_+_8442383.23-P2	h4_top5	ACOX3	P2	GCCTGGCAGGGGTTGAACTG
ACOX3_+_8442429.23-P2	h4_supp5	ACOX3	P2	GGAAATGAGAATGGCGCCGC
ACOX3_+_8442463.23-P2	h4_supp5	ACOX3	P2	GGCGTTGACGTCATGGAGGC
ACOX3_+_8442467.23-P2	h4_top5	ACOX3	P2	GCGGCGCGTTGACGTCATGG
ACOX3_-_8429711.23-P1	h4_supp5	ACOX3	P1	GTGCCCAGGGTCTACCGTCT
ACOX3_-_8430094.23-P1	h4_top5	ACOX3	P1	GTCACCCAGCAGGCGCTCAG
ACOX3_-_8430121.23-P1	h4_top5	ACOX3	P1	GTGTCGGCCCGCGACCGACT
ACOX3_-_8430129.23-P1	h4_top5	ACOX3	P1	GCGCGACCGACTCGGAGTAC
ACOX3_-_8442139.23-P2	h4_supp5	ACOX3	P2	GGCTGCACTCAGACTTAGGA
ACOX3_-_8442145.23-P2	h4_supp5	ACOX3	P2	GCTCAGACTTAGGAAGGCAC
ACOX3_-_8442419.23-P2	h4_top5	ACOX3	P2	GTGCCAGGGAAACCAAAAGC
ACOX3_-_8442435.23-P2	h4_top5	ACOX3	P2	GAGCAGGAAAGGATCTCCAG
ACOXL_+_111490261.23-P1P2	h4_supp5	ACOXL	P1P2	GTCCAGGTAGCGGTGCAGGG
ACOXL_+_111490271.23-P1P2	h4_top5	ACOXL	P1P2	GGAAGTCGCCGTCCAGGTAG
ACOXL_+_111490383.23-P1P2	h4_supp5	ACOXL	P1P2	GACACGCTCGGCGGCTTCGG
ACOXL_+_111490544.23-P1P2	h4_supp5	ACOXL	P1P2	GAGGGGGCCGAAGAGGTCGG
ACOXL_+_111490547.23-P1P2	h4_top5	ACOXL	P1P2	GCTCAGGGGGCCGAAGAGGT
ACOXL_+_111490560.23-P1P2	h4_top5	ACOXL	P1P2	GGGAGAGGGCACCTCTCAGG
ACOXL_+_111490595.23-P1P2	h4_top5	ACOXL	P1P2	GTGCACCCGACTCTTCGTGG
ACOXL_-_111490250.23-P1P2	h4_supp5	ACOXL	P1P2	GGCAGCCGGCGCCGGGTCTG
ACOXL_-_111490612.23-P1P2	h4_top5	ACOXL	P1P2	GCCCTCCCCCACGAAGAGTC
ACOXL_-_111490664.23-P1P2	h4_supp5	ACOXL	P1P2	GGGTGTCTACGAAGACCGTG
ACP1_+_264980.23-P1P2	h1_top5	ACP1	P1P2	GCACACAAACAGCACGGACT
ACP1_+_265303.23-P1P2	h1_top5	ACP1	P1P2	GCCATTGGAGGGGAACGAGA
ACP1_-_264936.23-P1P2	h1_supp5	ACP1	P1P2	GGTCGGCGTGCGGAACGCCG
ACP1_-_264967.23-P1P2	h1_top5	ACP1	P1P2	GGCCTCTGCGCGCGGGAAGA
ACP1_-_264970.23-P1P2	h1_top5	ACP1	P1P2	GTCTGCGCGCGGGAAGATGG
ACP1_-_264976.23-P1P2	h1_supp5	ACP1	P1P2	GCGCGGGAAGATGGCGGAAC
ACP1_-_265107.23-P1P2	h1_top5	ACP1	P1P2	GCGGCCTAGGAACCATGAGG
ACP1_-_265135.23-P1P2	h1_supp5	ACP1	P1P2	GCCAGGGACTGGGAGGCCTA
ACP1_-_265335.23-P1P2	h1_supp5	ACP1	P1P2	GCCCTCCAATGGGCCCAGGT
ACP1_-_265360.23-P1P2	h1_supp5	ACP1	P1P2	GGGAGGTTGTCGGACTGATG
ACP2_+_47270142.23-P1P2	h1_supp5	ACP2	P1P2	GGAGGTCGAGGATCTCGGGA
ACP2_+_47270309.23-P1P2	h1_supp5	ACP2	P1P2	GAAGCGGTCCGGCTGGAGCC
ACP2_+_47270320.23-P1P2	h1_top5	ACP2	P1P2	GTGATGGCGGGCAAGCGGTC
ACP2_+_47270332.23-P1P2	h1_top5	ACP2	P1P2	GAGATTACAACGGTGATGGC
ACP2_-_47269906.23-P1P2	h1_supp5	ACP2	P1P2	GATAGGCAAAGCCAAGGTAC
ACP2_-_47269915.23-P1P2	h1_top5	ACP2	P1P2	GGCCAAGGTACAGGTAGGAA
ACP2_-_47269943.23-P1P2	h1_supp5	ACP2	P1P2	GGAAGTGAAAGCAACGTATG
ACP2_-_47269958.23-P1P2	h1_top5	ACP2	P1P2	GTATGTGGTGGGGACAACTG
ACP2_-_47270292.23-P1P2	h1_supp5	ACP2	P1P2	GCACCAGGTTCACGCCGAGA
ACP2_-_47270385.23-P1P2	h1_top5	ACP2	P1P2	GCAAGCTGGAACCCGCTGGG
ACP5_+_11688472.23-P1	h1_top5	ACP5	P1	GGGAATAAAGGCTCAGGGAC
ACP5_+_11688484.23-P1	h1_supp5	ACP5	P1	GCTTCCTCCTCAGGGAATAA
ACP5_+_11689300.23-P2	h1_supp5	ACP5	P2	GACAGCTGCTGAGACTATGA
ACP5_+_11689329.23-P2	h1_supp5	ACP5	P2	GCAGGCTGCGGTCCCGTGGA
ACP5_+_11689378.23-P2	h1_supp5	ACP5	P2	GGGTGAGGAGCAGGTCAGAC
ACP5_+_11689751.23-P2	h1_supp5	ACP5	P2	GGCCCTCGAGCAGGGCGGAT
ACP5_-_11688043.23-P1	h1_supp5	ACP5	P1	GACCCCTCCCCAGTCACCCA
ACP5_-_11688058.23-P1	h1_supp5	ACP5	P1	GCCCACGGCTACAAAGCGCA
ACP5_-_11688064.23-P1	h1_supp5	ACP5	P1	GGCTACAAAGCGCAGGGCAG
ACP5_-_11688086.23-P1	h1_top5	ACP5	P1	GTGGCACCATCAGCCAGGGA
ACP5_-_11688218.23-P1	h1_supp5	ACP5	P1	GCCGCCTGCCCTGAGATAGA
ACP5_-_11688414.23-P1	h1_top5	ACP5	P1	GTGCCCAGCACTCACCCAGG
ACP5_-_11688437.23-P1	h1_top5	ACP5	P1	GGACACAGGCCAGTCACCGG
ACP5_-_11688455.23-P1	h1_top5	ACP5	P1	GGAGGCTCTGAGAGGCTGGT
ACP5_-_11689356.23-P2	h1_top5	ACP5	P2	GACGGGACCGCAGCCTGGGA
ACP5_-_11689724.23-P2	h1_top5	ACP5	P2	GCCGCAGGCGATCGCACTCC
ACP5_-_11689727.23-P2	h1_top5	ACP5	P2	GCAGGCGATCGCACTCCTGG
ACP5_-_11689744.23-P2	h1_top5	ACP5	P2	GGGCGGCCCCAGCTTTAAGC
ACP5_-_11689771.23-P2	h1_top5	ACP5	P2	GGCCGATCCGCCCTGCTCGA
ACP5_-_11689778.23-P2	h1_supp5	ACP5	P2	GCGCCCTGCTCGAGGGCTCA
ACP6_+_147141933.23-P1P2	h1_supp5	ACP6	P1P2	GGCAGGTGAGAGGTCGGCCC
ACP6_+_147141956.23-P1P2	h1_top5	ACP6	P1P2	GCTCAAGCCGCTCCCGCTGG
ACP6_+_147142089.23-P1P2	h1_supp5	ACP6	P1P2	GGGCGTACTGCCTGCACCAG
ACP6_+_147142126.23-P1P2	h1_supp5	ACP6	P1P2	GTGCGCTTGTGGACCCCAGT
ACP6_+_147142159.23-P1P2	h1_top5	ACP6	P1P2	GGGCCTACCACCATGATCAC
ACP6_+_147142188.23-P1P2	h1_supp5	ACP6	P1P2	GCCTGCAGCCTCAACCCGGA
ACP6_-_147141887.23-P1P2	h1_supp5	ACP6	P1P2	GGCTCTGAAGATGTGTGTCA
ACP6_-_147142348.23-P1P2	h1_top5	ACP6	P1P2	GCCTGAGGGAGACCCCGAGT
ACP6_-_147142356.23-P1P2	h1_top5	ACP6	P1P2	GAGACCCCGAGTGGGAACGG
ACP6_-_147142393.23-P1P2	h1_top5	ACP6	P1P2	GGCAGCAGCGAAGAGTCCCT
ACPL2_+_140950667.23-P1P2	h7_supp5	ACPL2	P1P2	GCTCCTCCCGGCGCGAGGGG
ACPL2_+_140950939.23-P1P2	h7_supp5	ACPL2	P1P2	GAGCGCGGGGATAAAGGAGG
ACPL2_+_140950942.23-P1P2	h7_top5	ACPL2	P1P2	GGCGAGCGCGGGGATAAAGG
ACPL2_+_140950963.23-P1P2	h7_top5	ACPL2	P1P2	GgcgCAAGTCCTAGGCTCAG
ACPL2_+_140951037.23-P1P2	h7_top5	ACPL2	P1P2	Gctgggagaagggggctatg
ACPL2_+_140951054.23-P1P2	h7_supp5	ACPL2	P1P2	Ggtgagacggcgccagctct
ACPL2_+_140951088.23-P1P2	h7_supp5	ACPL2	P1P2	Gggcttggagacagagccgg
ACPL2_+_140951203.23-P1P2	h7_top5	ACPL2	P1P2	GAATCTCGGCTGGAATCCAG
ACPL2_-_140950647.23-P1P2	h7_top5	ACPL2	P1P2	Gggccccgcgagctccccgg
ACPL2_-_140951141.23-P1P2	h7_supp5	ACPL2	P1P2	Ggcagccccgcactctcccg
ACPP_+_132036268.23-P1P2	h1_top5	ACPP	P1P2	GGCTGTTTCTGGCAGGAGTT
ACPP_+_132036293.23-P1P2	h1_top5	ACPP	P1P2	GGGGTGCAGCTCTCATGTTG
ACPP_+_132036338.23-P1P2	h1_top5	ACPP	P1P2	GAAACAAGAAGCCAAGGCTA
ACPP_+_132036344.23-P1P2	h1_supp5	ACPP	P1P2	GAAGCAGAAACAAGAAGCCA
ACPP_+_132036504.23-P1P2	h1_top5	ACPP	P1P2	GGTCTCTGGGAAACAATCCA
ACPP_+_132036703.23-P1P2	h1_top5	ACPP	P1P2	GGACTGGTGTGGCTGTCAAA
ACPP_+_132036714.23-P1P2	h1_supp5	ACPP	P1P2	GGGTTTCTTCTGGACTGGTG
ACPP_+_132036719.23-P1P2	h1_supp5	ACPP	P1P2	GGCTGTGGTTTCTTCTGGAC
ACPP_-_132036256.23-P1P2	h1_supp5	ACPP	P1P2	GCCTCTACAGGCTTTTGAAG
ACPP_-_132036481.23-P1P2	h1_supp5	ACPP	P1P2	GTTCCCAGCAAAGTCTGATA
ACPT_+_51293697.23-ENST00000270593.1	h1_top5	ACPT	ENST00000270593.1	GcagcagGAGAGGTCCAGCA
ACPT_+_51293752.23-ENST00000270593.1	h1_supp5	ACPT	ENST00000270593.1	GCGAACACCAGGGGTCCTTC
ACPT_+_51293761.23-ENST00000270593.1	h1_top5	ACPT	ENST00000270593.1	GCCAGAGCCACGAACACCAG
ACPT_+_51294074.23-ENST00000270593.1	h1_top5	ACPT	ENST00000270593.1	GACTCAGGAAGGCCTCGTAG
ACPT_+_51294085.23-ENST00000270593.1	h1_supp5	ACPT	ENST00000270593.1	GCGGTACTCCGGACTCAGGA
ACPT_+_51294143.23-ENST00000270593.1	h1_supp5	ACPT	ENST00000270593.1	GTCACAGGTGGGAGGTCAGG
ACPT_-_51293907.23-ENST00000270593.1	h1_supp5	ACPT	ENST00000270593.1	GTACCCCATGGACCCACACA
ACPT_-_51293910.23-ENST00000270593.1	h1_top5	ACPT	ENST00000270593.1	GCCCATGGACCCACACAAGG
ACPT_-_51294111.23-ENST00000270593.1	h1_supp5	ACPT	ENST00000270593.1	GCTGAGTCCGGAGTACCGGC
ACPT_-_51294122.23-ENST00000270593.1	h1_top5	ACPT	ENST00000270593.1	GGTACCGGCGGGAGGAGGTA
ACRBP_+_6756117.23-P1P2	h5_supp5	ACRBP	P1P2	GCGACTCAGGCCTCCACTCC
ACRBP_+_6756534.23-P1P2	h5_supp5	ACRBP	P1P2	GGACGCGGGCGGATCTTCTC
ACRBP_+_6756555.23-P1P2	h5_top5	ACRBP	P1P2	GAGAGGCGGCTTGTGTCCAC
ACRBP_+_6756569.23-P1P2	h5_top5	ACRBP	P1P2	GCGGCTTGGCCCGTTAGAGG
ACRBP_+_6756572.23-P1P2	h5_top5	ACRBP	P1P2	GCTGCGGCTTGGCCCGTTAG
ACRBP_-_6756113.23-P1P2	h5_supp5	ACRBP	P1P2	GGTATTCGGTAGGAGAGAGA
ACRBP_-_6756126.23-P1P2	h5_top5	ACRBP	P1P2	GGAGAGAGGGCTGCCTGGAG
ACRBP_-_6756147.23-P1P2	h5_top5	ACRBP	P1P2	GGAGGCCTGAGTCGAATCCT
ACRBP_-_6756321.23-P1P2	h5_supp5	ACRBP	P1P2	GGGGGGGAGTCTAGAGACAG
ACRBP_-_6756581.23-P1P2	h5_supp5	ACRBP	P1P2	GGGACACAAGCCGCCTCTAA
ACRC_+_70798298.23-P1P2	h7_supp5	ACRC	P1P2	GTGGAGTGTGTGCAAAGATC
ACRC_-_70797923.23-P1P2	h7_top5	ACRC	P1P2	GGGTCTGGACAATTCAAGTA
ACRC_-_70798359.23-P1P2	h7_top5	ACRC	P1P2	GCTGCTGCCGGCCACGCCAG
ACRC_-_70798376.23-P1P2	h7_top5	ACRC	P1P2	GAGAGGCTGCAACACCAGGT
ACRC_-_70798668.23-P1P2	h7_supp5	ACRC	P1P2	Ggagcagctggtagtgccag
ACRC_-_70798671.23-P1P2	h7_supp5	ACRC	P1P2	Gcagctggtagtgccagtgg
ACRC_-_70798717.23-P1P2	h7_top5	ACRC	P1P2	GcgTCATTGCAGATAGTGGG
ACRC_-_70798728.23-P1P2	h7_supp5	ACRC	P1P2	GATAGTGGGGGGCCtggtgg
ACRC_-_70798784.23-P1P2	h7_top5	ACRC	P1P2	Gagagaagtaggggcaccag
ACRC_-_70798787.23-P1P2	h7_supp5	ACRC	P1P2	Ggaagtaggggcaccagtgg
ACRV1_+_125550253.23-P1P2	h7_top5	ACRV1	P1P2	GTAATGTGCCAAGGAAAGAT
ACRV1_+_125550289.23-P1P2	h7_supp5	ACRV1	P1P2	GGTCCCACCAATTAAATGTG
ACRV1_+_125550420.23-P1P2	h7_top5	ACRV1	P1P2	GTACAGTCAGAGGGTCCCAC
ACRV1_+_125550697.23-P1P2	h7_top5	ACRV1	P1P2	GGAAGCTGTGGCCCACACTG
ACRV1_-_125550304.23-P1P2	h7_supp5	ACRV1	P1P2	GAGGATCCCTCACATTTAAT
ACRV1_-_125550308.23-P1P2	h7_supp5	ACRV1	P1P2	GTCCCTCACATTTAATTGGT
ACRV1_-_125550324.23-P1P2	h7_top5	ACRV1	P1P2	GGGTGGGACAAACCTTCATT
ACRV1_-_125550488.23-P1P2	h7_supp5	ACRV1	P1P2	GGTTCAGGAGCTCTCCGAGT
ACRV1_-_125550545.23-P1P2	h7_supp5	ACRV1	P1P2	GGTTTGGGTGACTGAGAGAC
ACRV1_-_125550695.23-P1P2	h7_top5	ACRV1	P1P2	GTCTGGATTTAGGAAAAGAG
ACR_+_51176655.23-P1P2	h3_supp5	ACR	P1P2	GAGCATCTCAACCATACTCC
ACR_+_51176910.23-P1P2	h3_supp5	ACR	P1P2	GGTGCTGAGGGGTCCATCTC
ACR_+_51177042.23-P1P2	h3_supp5	ACR	P1P2	GGGGCTGTTGGGGGCAACCA
ACR_+_51177061.23-P1P2	h3_top5	ACR	P1P2	GGTGAAGCGATGATATCCTG
ACR_+_51177099.23-P1P2	h3_top5	ACR	P1P2	GAGTGAGAGAGCCTACTGGG
ACR_-_51176666.23-P1P2	h3_top5	ACR	P1P2	GCCAGGCAGTGCCAGGAGTA
ACR_-_51176714.23-P1P2	h3_top5	ACR	P1P2	GCTGGTCTTGGCAGTGTCCG
ACR_-_51176829.23-P1P2	h3_top5	ACR	P1P2	GTCCAGGGCTAGGGAAAAGG
ACR_-_51177047.23-P1P2	h3_supp5	ACR	P1P2	GAGACAGCTGTCCCAACCCG
ACR_-_51177126.23-P1P2	h3_supp5	ACR	P1P2	GAGTAGGCTCTCTCACTCCA
ACSBG1_+_78526451.23-P1P2	h2_supp5	ACSBG1	P1P2	GGCTGCAGTTGGAGACCAGT
ACSBG1_+_78526472.23-P1P2	h2_top5	ACSBG1	P1P2	GATCCCAGGGGTATGAGCTG
ACSBG1_+_78526497.23-P1P2	h2_top5	ACSBG1	P1P2	GAAAGGCTCATCAAAGAATG
ACSBG1_+_78526814.23-P1P2	h2_top5	ACSBG1	P1P2	GGCAATTCTGGAGCTGGATA
ACSBG1_+_78526826.23-P1P2	h2_supp5	ACSBG1	P1P2	GGGCAGATGCCACGCAATTC
ACSBG1_+_78526846.23-P1P2	h2_top5	ACSBG1	P1P2	GTGTCTTCAGTGGAAGCCCG
ACSBG1_+_78526895.23-P1P2	h2_supp5	ACSBG1	P1P2	GCACCCCCACTGCTCACTCA
ACSBG1_-_78526407.23-P1P2	h2_supp5	ACSBG1	P1P2	GAGTCCCCCTTGAGGAGACA
ACSBG1_-_78526679.23-P1P2	h2_supp5	ACSBG1	P1P2	Gagtctagaactcggcccac
[truncated: 207,071+ more rows]

## Sheet: individual sgRNA rho values
	Treated (read count)	Treated (read count)	Untreated (read count)	Untreated (read count)	rho	rho	rho
sgId	Rep1	Rep2	Rep1	Rep2	Rep1	Rep2	ave_Rep1_Rep2
A1BG_+_58858549.23-P1	11	45	21	50		-0.018137
A1BG_+_58858791.23-P1	350	416	472	515	-0.116615	-0.0713745	-0.0939948
A1BG_+_58858964.23-P1	188	198	163	196	0.0439121	0.0387401	0.0413261
A1BG_+_58864367.23-P2	579	521	439	423	0.092648	0.136344	0.114496
A1BG_+_58864705.23-P2	355	451	386	501	-0.0383657	-0.0180278	-0.0281967
A1BG_-_58858562.23-P1	147	266	146	307	-0.00546147	-0.0368433	-0.0211524
A1BG_-_58858617.23-P1	181	180	149	248	0.0627576	-0.124055	-0.0306488
A1BG_-_58858630.23-P1	177	203	281	230	-0.175907	-0.0277449	-0.101826
A1BG_-_58858788.23-P1	509	473	538	431	-0.0280782	0.079527	0.0257244
A1BG_-_58858915.23-P1	221	251	306	336	-0.1262	-0.109868	-0.118034
A1BG_-_58858950.23-P1	369	369	398	465	-0.0354351	-0.0801189	-0.057777
A1BG_-_58858991.23-P1	393	506	335	434	0.0500852	0.109319	0.079702
A1BG_-_58864354.23-P2	774	692	598	764	0.0858081	-0.0149962	0.0354059
A1BG_-_58864360.23-P2	899	869	890	1048	-0.00428566	-0.0584809	-0.0313833
A1BG_-_58864420.23-P2	196	238	263	310	-0.114796	-0.0963976	-0.105597
A1BG_-_58864428.23-P2	373	345	228	250	0.170935	0.192331	0.181633
A1BG_-_58864436.23-P2	465	585	415	546	0.0333979	0.0677124	0.0505551
A1BG_-_58864715.23-P2	540	679	653	594	-0.0769908	0.099594	0.0113016
A1BG_-_58864822.23-P2	755	793	764	896	-0.0122483	-0.0263878	-0.0193181
A1BG_-_58864840.23-P2	245	392	187	400	0.0902301	0.0237936	0.0570119
A1CF_+_52645000.23-P1P2	430	602	395	620	0.0229104	0.0192344	0.0210724
A1CF_+_52645034.23-P1P2	256	186	329	294	-0.0991117	-0.19169	-0.145401
A1CF_+_52645080.23-P1P2	54	71	46	106	0.0503264	-0.163588	-0.0566306
A1CF_+_52645091.23-P1P2	259	216	285	264	-0.0427052	-0.0650665	-0.0538859
A1CF_+_52645339.23-P1P2	442	541	467	711	-0.027936	-0.100805	-0.0643706
A1CF_+_52645358.23-P1P2	462	522	516	608	-0.0481129	-0.0413515	-0.0447322
A1CF_+_52645377.23-P1P2	1024	1096	991	1167	0.00396194	0.00283443	0.00339819
A1CF_-_52645011.23-P1P2	475	607	397	601	0.057244	0.0386325	0.0479382
A1CF_-_52645249.23-P1P2	315	311	366	463	-0.062474	-0.162197	-0.112335
A1CF_-_52645373.23-P1P2	310	452	348	462	-0.0499619	0.0229664	-0.0134978
A2ML1_+_8975211.23-P1P2	165	223	244	223	-0.150112	0.0337412	-0.0581855
A2ML1_+_8975278.23-P1P2	219	319	256	378	-0.0646707	-0.0498185	-0.0572446
A2ML1_+_8975452.23-P1P2	583	656	492	635	0.0537299	0.0497614	0.0517456
A2ML1_-_8975403.23-P1P2	366	317	289	409	0.0778953	-0.0917257	-0.00691521
A2ML1_-_8975471.23-P1P2	130	170	147	207	-0.0526031	-0.0632199	-0.0579115
A2ML1_-_8975487.23-P1P2	554	653	719	659	-0.102679	0.0292376	-0.0367207
A2ML1_-_8975582.23-P1P2	518	558	425	651	0.0639696	-0.0421607	0.0109045
A2ML1_-_8975593.23-P1P2	171	174	121	224	0.117748	-0.0906313	0.0135583
A2ML1_-_8975664.23-P1P2	588	688	555	806	0.0130475	-0.0442012	-0.0155769
A2ML1_-_8975669.23-P1P2	249	368	322	319	-0.101371	0.104099	0.00136392
A2M_+_9268141.23-P1P2	386	638	430	681	-0.0471702	0.00162569	-0.0227722
A2M_+_9268487.23-P1P2	556	634	521	636	0.0156856	0.0321903	0.023938
A2M_+_9268495.23-P1P2	372	384	441	434	-0.0697748	-0.026528	-0.0481514
A2M_+_9268524.23-P1P2	52	93	57	82	-0.0413048	0.095723	0.0272091
A2M_-_9268044.23-P1P2	1035	1106	950	1149	0.0231994	0.0149605	0.0190799
A2M_-_9268273.23-P1P2	1101	1004	942	1037	0.0487369	0.0178174	0.0332772
A2M_-_9268326.23-P1P2	773	786	836	785	-0.0364142	0.034368	-0.00102309
A2M_-_9268360.23-P1P2	6	18	20	1
A2M_-_9268387.23-P1P2	799	775	852	794	-0.0312816	0.0218153	-0.0047331
A2M_-_9268427.23-P1P2	444	450	303	526	0.13091	-0.0430977	0.0439061
A3GALT2_+_33786262.23-ENST00000442999.3	286	338	299	375	-0.0240958	-0.0174081	-0.0207519
A3GALT2_+_33786358.23-ENST00000442999.3	315	318	231	335	0.104768	0.00809806	0.0564331
A3GALT2_+_33786467.23-ENST00000442999.3	367	434	374	464	-0.0148081	0.000829996	-0.00698904
A3GALT2_+_33786635.23-ENST00000442999.3	453	532	403	585	0.0345595	-0.01302	0.0107697
A3GALT2_+_33786649.23-ENST00000442999.3	417	437	484	435	-0.062088	0.0359998	-0.0130441
A3GALT2_+_33786659.23-ENST00000442999.3	251	457	367	523	-0.146001	-0.0326809	-0.0893408
A3GALT2_+_33786675.23-ENST00000442999.3	123	62	164	129	-0.112485	-0.32702	-0.219753
A3GALT2_+_33786682.23-ENST00000442999.3	172	139	201	146	-0.0645634	0.00954886	-0.0275073
A3GALT2_-_33786237.23-ENST00000442999.3	202	359	181	314	0.0319486	0.0996863	0.0658174
A3GALT2_-_33786280.23-ENST00000442999.3	100	134	95	123	0.0106979	0.0759168	0.0433074
A4GALT_+_43116425.23-P1P2	254	400	215	453	0.0526353	-0.0275254	0.0125549
A4GALT_+_43116792.23-P1P2	505	382	467	405	0.0204864	0.00495303	0.0127197
A4GALT_-_43116413.23-P1P2	233	253	311	260	-0.112875	0.0203029	-0.0462862
A4GALT_-_43116431.23-P1P2	750	645	619	604	0.061819	0.0660793	0.0639491
A4GALT_-_43116434.23-P1P2	451	487	474	547	-0.0260175	-0.0234667	-0.0247421
A4GALT_-_43116460.23-P1P2	320	258	370	350	-0.0607011	-0.116424	-0.0885625
A4GALT_-_43116503.23-P1P2	272	201	251	216	0.0212568	-0.00169766	0.00977956
A4GALT_-_43116683.23-P1P2	271	378	363	326	-0.114158	0.106613	-0.00377244
A4GALT_-_43116819.23-P1P2	187	307	196	377	-0.025024	-0.0673939	-0.046209
A4GALT_-_43116823.23-P1P2	15	23	28	28
A4GNT_+_137850764.23-P1P2	413	516	391	462	0.0119505	0.0881706	0.0500605
A4GNT_+_137850968.23-P1P2	315	330	285	279	0.0284282	0.116404	0.0724159
A4GNT_+_137851024.23-P1P2	791	880	959	891	-0.0779302	0.0276245	-0.0251529
A4GNT_+_137851046.23-P1P2	515	631	509	546	-0.00368339	0.104983	0.0506499
A4GNT_+_137851070.23-P1P2	467	598	434	643	0.0186896	-0.00198348	0.00835305
A4GNT_+_137851178.23-P1P2	584	671	399	950	0.130491	-0.137458	-0.00348363
A4GNT_-_137850791.23-P1P2	363	344	461	398	-0.0947927	-0.038054	-0.0664234
A4GNT_-_137850879.23-P1P2	349	356	272	317	0.0826425	0.0908724	0.0867574
A4GNT_-_137851117.23-P1P2	400	521	448	597	-0.0491256	-0.0333058	-0.0412157
A4GNT_-_137851121.23-P1P2	185	247	173	277	0.0164291	-0.0227008	-0.00313586
AAAS_+_53714942.23-P1P2	245	244	191	250	0.0825389	0.0217798	0.0521593
AAAS_+_53714983.23-P1P2	348	319	272	296	0.0815997	0.0705873	0.0760935
AAAS_+_53715016.23-P1P2	172	208	127	140	0.10228	0.228675	0.165477
AAAS_+_53715355.23-P1P2	197	320	275	205	-0.12916	0.253007	0.0619233
AAAS_-_53715347.23-P1P2	156	171	165	176	-0.0283249	0.0195504	-0.00438727
AAAS_-_53715352.23-P1P2	172	97	127	105	0.10228	-0.00528021	0.0484997
AAAS_-_53715363.23-P1P2	278	285	260	305	0.0163837	0.000346187	0.00836496
AAAS_-_53715371.23-P1P2	625	787	540	789	0.0451806	0.0324915	0.038836
AAAS_-_53715389.23-P1P2	777	699	703	734	0.0284282	0.00968397	0.0190561
AAAS_-_53715438.23-P1P2	342	337	344	353	-0.010061	0.0109017	0.000420375
AACS_+_125549974.23-P1P2	75	130	70	104	0.0171299	0.143614	0.0803721
AACS_+_125549983.23-P1P2	164	173	148	156	0.0293624	0.0846716	0.057017
AACS_+_125549999.23-P1P2	568	484	466	505	0.0639877	0.0128278	0.0384077
AACS_+_125550002.23-P1P2	227	316	340	311	-0.154754	0.0415944	-0.0565797
AACS_+_125550035.23-P1P2	249	263	175	347	0.120217	-0.102734	0.00874133
AACS_+_125550369.23-P1P2	330	359	291	352	0.0377625	0.0434369	0.0405997
AACS_+_125550406.23-P1P2	302	328	315	281	-0.0232577	0.109893	0.0433178
AACS_-_125550169.23-P1P2	24	36	41	46
AACS_-_125550187.23-P1P2	89	83	73	141	0.0640753	-0.227184	-0.0815545
AACS_-_125550379.23-P1P2	268	355	297	333	-0.0452795	0.0652418	0.00998114
AADACL2_+_151451732.23-P1P2	1255	1345	1121	1618	0.033091	-0.0572504	-0.0120797
AADACL2_+_151451892.23-P1P2	99	122	144	135	-0.144105	-0.0161149	-0.0801101
AADACL2_+_151451926.23-P1P2	1145	1320	1061	1312	0.0197464	0.0367344	0.0282404
AADACL2_+_151451935.23-P1P2	167	149	193	128	-0.0605246	0.108543	0.0240091
AADACL2_+_151452057.23-P1P2	333	428	225	569	0.134526	-0.10647	0.014028
AADACL2_+_151452121.23-P1P2	1442	1531	1271	1609	0.0379288	0.00927359	0.0236012
AADACL2_-_151451828.23-P1P2	1200	1488	1330	1625	-0.0453203	-0.00962578	-0.0274731
AADACL2_-_151451931.23-P1P2	376	454	337	491	0.0318525	-0.00483586	0.0135083
AADACL2_-_151451961.23-P1P2	594	626	459	586	0.0857529	0.0662538	0.0760033
AADACL2_-_151452019.23-P1P2	1277	1298	1368	1557	-0.0329571	-0.0558419	-0.0443995
AADACL3_+_12776115.23-P1P2	610	508	412	727	0.134669	-0.142753	-0.00404193
AADACL3_+_12776121.23-P1P2	523	481	516	374	-0.00304533	0.157631	0.0772931
AADACL3_+_12776133.23-P1P2	684	665	624	618	0.0254208	0.0698325	0.0476266
AADACL3_+_12776213.23-P1P2	207	155	225	247	-0.0382428	-0.195693	-0.116968
AADACL3_+_12776313.23-P1P2	319	292	258	283	0.0691828	0.0491563	0.0591695
AADACL3_+_12776369.23-P1P2	137	213	145	266	-0.028566	-0.0756693	-0.0521176
AADACL3_+_12776495.23-P1P2	479	550	407	539	0.0512511	0.0436887	0.0474699
AADACL3_-_12776129.23-P1P2	26	14	29	22
AADACL3_-_12776233.23-P1P2	443	364	417	456	0.0140377	-0.0772129	-0.0315876
AADACL3_-_12776507.23-P1P2	340	462	254	437	0.0980293	0.0611335	0.0795814
AADACL4_+_12704492.23-P1P2	662	629	608	627	0.0229799	0.0353093	0.0291446
AADACL4_+_12704556.23-P1P2	566	626	486	594	0.0474347	0.0595773	0.053506
AADACL4_+_12704573.23-P1P2	422	350	394	399	0.0170069	-0.0307755	-0.00688427
AADACL4_+_12704601.23-P1P2	486	600	526	488	-0.0366842	0.135475	0.0493956
AADACL4_+_12704653.23-P1P2	468	564	465	518	-0.00560504	0.075633	0.035014
AADACL4_+_12704686.23-P1P2	613	698	637	725	-0.0218983	0.0150538	-0.00342223
AADACL4_+_12704714.23-P1P2	77	107	97	88	-0.0918529	0.129999	0.019073
AADACL4_+_12704720.23-P1P2	434	519	614	598	-0.134024	-0.0360236	-0.0850236
AADACL4_+_12704750.23-P1P2	368	480	397	608	-0.0355071	-0.0826537	-0.0590804
AADACL4_-_12704768.23-P1P2	665	599	486	731	0.106012	-0.0643187	0.0208467
AADAC_+_151532013.23-P1P2	373	281	354	281	0.011057	0.0337412	0.0223991
AADAC_+_151532125.23-P1P2	671	652	636	658	0.0115255	0.0292307	0.0203781
AADAC_+_151532371.23-P1P2	548	754	566	705	-0.0196866	0.0668269	0.0235701
AADAC_-_151531905.23-P1P2	210	260	208	317	-0.00446449	-0.0638599	-0.0341622
AADAC_-_151531939.23-P1P2	605	614	724	805	-0.0731951	-0.0996206	-0.0864078
AADAC_-_151531954.23-P1P2	288	352	227	298	0.0785508	0.115742	0.0971465
AADAC_-_151531985.23-P1P2	447	408	492	347	-0.0427993	0.11348	0.0353401
AADAC_-_151532317.23-P1P2	168	286	267	274	-0.176299	0.0548467	-0.0607263
AADAC_-_151532366.23-P1P2	222	195	195	288	0.0391828	-0.158271	-0.0595439
AADAC_-_151532397.23-P1P2	314	386	344	471	-0.0411017	-0.0642541	-0.0526779
AADAT_+_171010904.23-P1P2	840	723	814	760	0.0034838	0.00916651	0.00632516
AADAT_+_171010929.23-P1P2	254	379	245	314	0.00516799	0.126381	0.0657743
AADAT_+_171011005.23-P1P2	280	281	166	182	0.182044	0.247609	0.214826
AADAT_+_171011279.23-P1P2	285	333	335	385	-0.0666824	-0.0377046	-0.0521935
AADAT_+_171011325.23-P1P2	259	307	295	369	-0.0552375	-0.0568329	-0.0560352
AADAT_+_171011392.23-P1P2	446	481	469	444	-0.0262151	0.0731532	0.023469
AADAT_-_171011321.23-P1P2	471	554	525	498	-0.0473854	0.0862122	0.0194134
AADAT_-_171011333.23-P1P2	10	25	5	7
AADAT_-_171011368.23-P1P2	490	429	388	575	0.0768754	-0.110486	-0.0168051
AADAT_-_171011381.23-P1P2	207	195	150	145	0.109103	0.179619	0.144361
AAED1_+_99417117.23-P1P2	730	589	688	665	0.0135915	-0.0260154	-0.00621196
AAED1_+_99417228.23-P1P2	136	105	109	138	0.0724808	-0.100825	-0.0141721
AAED1_+_99417233.23-P1P2	147	219	175	214	-0.0713019	0.0451132	-0.0130943
AAED1_+_99417483.23-P1P2	170	129	118	150	0.12474	-0.0405221	0.042109
AAED1_+_99417525.23-P1P2	351	299	297	313	0.0527653	0.0112097	0.0319875
AAED1_+_99417589.23-P1P2	129	275	156	166	-0.0770037	0.28229	0.102643
AAED1_-_99417150.23-P1P2	311	307	374	453	-0.0749757	-0.157819	-0.116398
AAED1_-_99417451.23-P1P2	165	234	203	241	-0.0832603	0.0192277	-0.0320163
AAED1_-_99417574.23-P1P2	332	445	435	502	-0.106137	-0.0256042	-0.0658704
AAED1_-_99417581.23-P1P2	141	157	110	168	0.0822826	0.000397603	0.0413401
AAGAB_+_67546560.23-P1P2	466	513	314	614	0.135525	-0.0547502	0.0403875
AAGAB_+_67546965.23-P1P2	20	167	7	123		0.184318
AAGAB_+_67546984.23-P1P2	153	169	150	230	-0.000745764	-0.118003	-0.0593744
AAGAB_-_67546617.23-P1P2	416	479	554	472	-0.112048	0.0409899	-0.0355293
AAGAB_-_67546714.23-P1P2	197	258	287	303	-0.144681	-0.0454215	-0.0950514
AAGAB_-_67546743.23-P1P2	243	241	246	332	-0.012401	-0.123989	-0.0681951
AAGAB_-_67546780.23-P1P2	374	377	329	428	0.0386451	-0.028732	0.00495655
AAGAB_-_67546928.23-P1P2	259	285	300	319	-0.0613451	-0.0217518	-0.0415485
AAGAB_-_67546952.23-P1P2	153	123	150	62	-0.000745764	0.371051	0.185153
AAGAB_-_67546997.23-P1P2	5	25	8	5
AAK1_+_69870290.23-P1P2	213	292	220	344	-0.0196927	-0.0469551	-0.0333239
AAK1_+_69870701.23-P1P2	318	309	325	335	-0.0158546	-0.00603843	-0.0109465
AAK1_+_69870743.23-P1P2	130	308	270	277	-0.273546	0.0859748	-0.0937856
AAK1_-_69870339.23-P1P2	349	238	211	293	0.174925	-0.0686271	0.0531492
AAK1_-_69870541.23-P1P2	149	151	199	188	-0.113095	-0.0741715	-0.0936331
AAK1_-_69870640.23-P1P2	105	130	49	62	0.269019	0.398305	0.333662
AAK1_-_69870719.23-P1P2	321	360	364	291	-0.0536259	0.138512	0.0424429
AAK1_-_69870759.23-P1P2	234	204	241	308	-0.0186535	-0.169112	-0.093883
AAK1_-_69870791.23-P1P2	804	966	857	960	-0.0311409	0.036809	0.00283404
AAK1_-_69870794.23-P1P2	329	228	335	194	-0.0145097	0.113256	0.049373
AAMDC_+_77532426.23-P1P2	207	165	263	99	-0.0949526	0.285265	0.0951563
AAMDC_-_77532187.23-P1P2	463	446	563	519	-0.0790057	-0.0408973	-0.0599515
AAMDC_-_77532195.23-P1P2	217	253	184	255	0.0520049	0.0298641	0.0409345
AAMDC_-_77532222.23-P1P2	101	105	185	160	-0.227884	-0.173659	-0.200772
AAMDC_-_77532236.23-P1P2	208	292	264	296	-0.0945804	0.0270419	-0.0337692
AAMDC_-_77532439.23-P1P2	259	296	422	505	-0.185345	-0.229292	-0.207318
AAMDC_-_77532634.23-P1P2	238	283	178	285	0.0976208	0.0302736	0.0639472
AAMDC_-_77532649.23-P1P2	326	295	320	275	-0.00119138	0.0683089	0.0335587
AAMDC_-_77532686.23-P1P2	723	639	622	469	0.0467383	0.186037	0.116388
AAMDC_-_77532705.23-P1P2	301	299	298	308	-0.00430193	0.0191388	0.00741845
AAMP_+_219134841.23-P1P2	22	27	23	39
AAMP_+_219134851.23-P1P2	49	67	22	20		0.629018
AAMP_-_219134310.23-P1P2	247	324	242	364	-0.000510288	-0.0235778	-0.012044
AAMP_-_219134415.23-P1P2	386	374	303	375	0.0800386	0.0324264	0.0562325
AAMP_-_219134418.23-P1P2	167	274	176	144	-0.0270169	0.350501	0.161742
AAMP_-_219134424.23-P1P2	563	428	504	492	0.0322875	-0.0348757	-0.00129411
AAMP_-_219134443.23-P1P2	43	58	25	73		-0.079516
AAMP_-_219134449.23-P1P2	539	581	337	524	0.162722	0.0845846	0.123653
AAMP_-_219134453.23-P1P2	312	275	313	308	-0.0091049	-0.0220604	-0.0155827
AAMP_-_219134469.23-P1P2	540	776	517	927	0.00787539	-0.0538058	-0.0229652
AANAT_+_74463710.23-P1P2	436	500	487	552	-0.0481419	-0.0149756	-0.0315588
AANAT_+_74463718.23-P1P2	644	827	742	781	-0.0594177	0.0619203	0.00125128
AANAT_+_74463735.23-P1P2	1138	1153	1076	1038	0.0124163	0.085477	0.0489467
AANAT_+_74463793.23-P1P2	353	431	332	383	0.0143464	0.0918789	0.0531126
AANAT_+_74464038.23-P1P2	887	579	553	978	0.163759	-0.224372	-0.0303062
AANAT_+_74464088.23-P1P2	561	707	541	708	0.00524996	0.0330452	0.0191476
AANAT_+_74464143.23-P1P2	349	515	452	487	-0.101921	0.061267	-0.0203269
AANAT_-_74463789.23-P1P2	116	155	170	257	-0.146836	-0.215235	-0.181036
AANAT_-_74464175.23-P1P2	401	480	449	442	-0.0490285	0.0743514	0.0126615
AANAT_-_74464185.23-P1P2	715	871	708	818	-0.00436674	0.0646531	0.0301432
AAR2_+_34824386.23-P1P2	208	233	116	278	0.204264	-0.0532059	0.0755292
AAR2_+_34824405.23-P1P2	96	125	112	70	-0.0639603	0.319236	0.127638
AAR2_+_34824485.23-P1P2	367	444	341	365	0.0187603	0.130213	0.0744868
AAR2_+_34824488.23-P1P2	70	93	92	152	-0.107257	-0.208159	-0.157708
AAR2_+_34824655.23-P1P2	533	594	649	627	-0.0794994	0.00711916	-0.0361901
AAR2_+_34824681.23-P1P2	338	290	247	271	0.106041	0.0671064	0.0865736
AAR2_-_34824417.23-P1P2	109	77	60	113	0.209009	-0.15513	0.0269393
AAR2_-_34824425.23-P1P2	253	286	290	259	-0.0575429	0.0825682	0.0125126
AAR2_-_34824434.23-P1P2	23	25	11	33
AAR2_-_34824937.23-P1P2	597	668	515	664	0.0457503	0.0366985	0.0412244
AARD_+_117950477.23-P1P2	670	773	549	751	0.0644396	0.0479581	0.0561988
AARD_+_117950489.23-P1P2	208	331	236	279	-0.0538371	0.117893	0.0320282
AARD_+_117950882.23-P1P2	548	454	389	487	0.116593	-0.000808131	0.0578926
AARD_+_117950890.23-P1P2	170	231	179	285	-0.0266888	-0.0696954	-0.0481921
AARD_+_117950901.23-P1P2	114	114	47	148	0.314048	-0.0947787	0.109635
AARD_+_117950911.23-P1P2	575	358	413	434	0.112315	-0.0610491	0.0256329
AARD_-_117950494.23-P1P2	523	531	420	561	0.0717612	0.00668012	0.0392206
AARD_-_117950667.23-P1P2	362	486	421	516	-0.0628112	0.00424809	-0.0292815
AARD_-_117950692.23-P1P2	206	180	124	173	0.176517	0.0532719	0.114895
AARD_-_117950728.23-P1P2	173	223	233	175	-0.116143	0.153089	0.0184729
AARS2_+_44280645.23-P1P2	255	225	283	318	-0.0458022	-0.136601	-0.0912014
AARS2_+_44280650.23-P1P2	900	1094	786	1037	0.041276	0.0600882	0.0506821
AARS2_+_44280670.23-P1P2	79	117	88	80	-0.0471488	0.220921	0.0868861
AARS2_+_44281006.23-P1P2	64	100	40	70	0.162857	0.209363	0.18611
AARS2_+_44281027.23-P1P2	28	42	23	13
AARS2_+_44281044.23-P1P2	0	26	0	7
AARS2_+_44281056.23-P1P2	46	153	116	237	-0.344068	-0.181738	-0.262903
AARS2_-_44280878.23-P1P2	55	30	18	40	0.397961
AARS2_-_44281001.23-P1P2	54	63	54	53	-0.00794202	0.118847	0.0554524
AARS2_-_44281016.23-P1P2	113	126	123	167	-0.038757	-0.10497	-0.0718636
AARSD1_+_41116203.23-P1	803	645	697	893	0.0435042	-0.12645	-0.0414731
AARSD1_+_41116343.23-P1	264	238	336	315	-0.0955801	-0.104276	-0.0999281
AARSD1_+_41116412.23-P1	278	227	209	275	0.095731	-0.0607091	0.017511
AARSD1_+_41116417.23-P1	792	727	755	869	0.00944432	-0.0541089	-0.0223323
AARSD1_+_41132061.23-P2	2185	2023	2004	2086	0.0234813	0.0186412	0.0210613
AARSD1_+_41132078.23-P2	624	821	727	929	-0.0634607	-0.0271108	-0.0452858
AARSD1_-_41116054.23-P1	275	378	392	416	-0.136764	-0.0134251	-0.0750944
AARSD1_-_41116243.23-P1	828	760	607	919	0.104888	-0.0597965	0.0225456
AARSD1_-_41116425.23-P1	172	210	146	181	0.0516147	0.106915	0.0792649
AARSD1_-_41116465.23-P1	184	337	247	323	-0.114946	0.0546335	-0.0301562
AARSD1_-_41116499.23-P1	114	136	206	201	-0.222957	-0.15861	-0.190784
AARSD1_-_41116508.23-P1	305	294	189	332	0.165968	-0.0261111	0.0699285
AARSD1_-_41131671.23-P2	118	230	154	262	-0.104704	-0.0303998	-0.0675517
AARSD1_-_41131701.23-P2	498	432	425	538	0.0496607	-0.0743048	-0.0123221
AARSD1_-_41131712.23-P2	1962	1958	1700	1988	0.0441462	0.0262542	0.0352002
AARSD1_-_41131716.23-P2	824	837	831	1097	-0.0110161	-0.0994547	-0.0552354
AARSD1_-_41132004.23-P2	136	160	199	238	-0.14627	-0.161784	-0.154027
AARSD1_-_41132022.23-P2	166	228	236	161	-0.135802	0.205063	0.0346306
AARSD1_-_41132037.23-P2	1542	1822	1638	1678	-0.0298898	0.0742805	0.0221954
AARSD1_-_41132088.23-P2	1546	1689	1467	1706	0.0111188	0.02881	0.0199644
AARS_+_70323296.23-P1P2	15	9	0	20
AARS_+_70323318.23-P1P2	0	23	0	17
AARS_+_70323322.23-P1P2	9	112	3	100		0.0895428
AARS_+_70323353.23-P1P2	3	1	0	0
AARS_+_70323362.23-P1P2	0	19	0	7
AARS_+_70323368.23-P1P2	150	165	194	181	-0.101417	-0.01183	-0.0566233
AARS_+_70323376.23-P1P2	2	21	13	36
AARS_-_70322952.23-P1P2	38	37	33	71		-0.287178
AARS_-_70323314.23-P1P2	0	0	0	5
AARS_-_70323332.23-P1P2	11	23	0	10
AASDHPPT_+_105948405.23-P1P2	31	0	20	1
AASDHPPT_+_105948450.23-P1P2	55	193	49	80	0.0340353	0.467369	0.250702
AASDHPPT_+_105948470.23-P1P2	111	66	50	91	0.281871	-0.124416	0.0787277
AASDHPPT_+_105948804.23-P1P2	121	146	150	166	-0.0860164	-0.0294721	-0.0577443
AASDHPPT_+_105948813.23-P1P2	64	90	56	129	0.0405832	-0.14352	-0.0514682
AASDHPPT_+_105948816.23-P1P2	469	509	446	584	0.0103311	-0.0339389	-0.0118039
AASDHPPT_-_105948374.23-P1P2	254	226	311	343	-0.0815153	-0.171681	-0.126598
AASDHPPT_-_105948417.23-P1P2	39	121	35	90		0.179478
AASDHPPT_-_105948422.23-P1P2	35	30	42	56		-0.273585
AASDHPPT_-_105948779.23-P1P2	240	171	228	263	0.0106979	-0.178227	-0.0837645
AASDH_+_57253516.23-P1P2	199	167	155	232	0.0828641	-0.128128	-0.022632
AASDH_+_57253570.23-P1P2	910	1157	993	1036	-0.0396617	0.0881319	0.0242351
AASDH_+_57253636.23-P1P2	74	126	60	98	0.0682703	0.157485	0.112878
AASDH_+_57253649.23-P1P2	98	125	67	72	0.13025	0.305366	0.217808
AASDH_-_57253280.23-P1P2	143	152	121	142	0.0527653	0.0672498	0.0600076
AASDH_-_57253356.23-P1P2	547	578	617	607	-0.0517026	0.00963639	-0.0210331
AASDH_-_57253362.23-P1P2	820	1021	924	708	-0.0513347	0.214001	0.0813332
AASDH_-_57253574.23-P1P2	459	472	448	411	0.000872943	0.101881	0.0513768
AASDH_-_57253588.23-P1P2	202	287	151	326	0.0978027	-0.0289964	0.0344032
AASDH_-_57253646.23-P1P2	70	129	116	112	-0.191493	0.103322	-0.0440855
AASS_+_121784000.23-P1P2	193	163	255	108	-0.109175	0.236417	0.0636209
AASS_+_121784213.23-P1P2	423	463	436	475	-0.0189421	0.0211421	0.00109997
AASS_+_121784219.23-P1P2	603	692	621	628	-0.018631	0.0815253	0.0314471
AASS_+_121784247.23-P1P2	317	323	482	394	-0.160222	-0.0640955	-0.112159
AASS_+_121784250.23-P1P2	60	136	82	141	-0.121459	0.0159635	-0.0527476
AASS_-_121784091.23-P1P2	562	716	595	589	-0.0286774	0.129882	0.0506022
AASS_-_121784229.23-P1P2	184	131	246	183	-0.113472	-0.130858	-0.122165
AASS_-_121784277.23-P1P2	686	932	741	1000	-0.0359685	-0.000933955	-0.0184512
AASS_-_121784313.23-P1P2	704	619	795	655	-0.0521182	0.00590654	-0.0231058
AASS_-_121784328.23-P1P2	654	749	620	782	0.0114591	0.0125115	0.0119853
AATF_+_35306366.23-P1P2	390	447	535	562	-0.12282	-0.0789876	-0.100904
AATF_+_35306650.23-P1P2	504	472	522	402	-0.0206942	0.112783	0.0460442
AATF_-_35306286.23-P1P2	0	9	0	43
AATF_-_35306312.23-P1P2	329	381	432	589	-0.10692	-0.180756	-0.143838
AATF_-_35306320.23-P1P2	373	358	313	420	0.0557892	-0.0449038	0.00544271
AATF_-_35306333.23-P1P2	272	294	153	235	0.201145	0.144033	0.172589
AATF_-_35306340.23-P1P2	118	54	59	72	0.243947	-0.10791	0.0680186
AATF_-_35306346.23-P1P2	11	37	15	113		-0.515995
AATF_-_35306351.23-P1P2	121	147	98	184	0.0686709	-0.0768014	-0.00406521
AATF_-_35306747.23-P1P2	848	953	685	949	0.0696298	0.0358122	0.052721
AATK_+_79139544.23-ENST00000326724.4	285	258	270	268	0.011706	0.015017	0.0133615
AATK_+_79139571.23-ENST00000326724.4	230	316	331	296	-0.140234	0.0659348	-0.0371494
AATK_+_79139589.23-ENST00000326724.4	669	551	750	628	-0.0494746	-0.0306657	-0.0400702
AATK_+_79139592.23-ENST00000326724.4	525	644	570	837	-0.0378273	-0.095326	-0.0665767
AATK_-_79139586.23-ENST00000326724.4	359	408	443	355	-0.0843458	0.102257	0.00895541
AATK_-_79139702.23-ENST00000326724.4	267	337	176	354	0.14351	0.00950883	0.0765094
AATK_-_79139880.23-ENST00000326724.4	431	547	395	586	0.0237545	-0.000170027	0.0117922
AATK_-_79139956.23-ENST00000326724.4	360	409	316	415	0.0394314	0.0265704	0.0330009
AATK_-_79139960.23-ENST00000326724.4	196	152	238	170	-0.0784982	-0.0213658	-0.049932
AATK_-_79139975.23-ENST00000326724.4	220	247	315	285	-0.138382	-0.0367199	-0.0875511
ABAT_+_8768492.23-P1	325	432	483	400	-0.151918	0.0716358	-0.0401409
ABAT_+_8768526.23-P1	694	695	656	733	0.0125214	0.0075295	0.0100255
ABAT_+_8768542.23-P1	853	888	706	1042	0.0607929	-0.0450041	0.00789438
ABAT_+_8768682.23-P1	243	224	258	226	-0.029709	0.0293644	-0.000172296
ABAT_+_8768874.23-P1	168	266	205	290	-0.0802752	-0.00879352	-0.0445344
ABAT_+_8807437.23-P2	35	4	24	1
ABAT_+_8807445.23-P2	353	367	283	376	0.0723769	0.021812	0.0470944
ABAT_+_8807450.23-P2	320	549	375	483	-0.065579	0.096807	0.015614
ABAT_+_8807464.23-P2	1384	1356	1191	1299	0.0466349	0.0548865	0.0507607
ABAT_+_8807492.23-P2	491	443	411	457	0.0566889	0.0184212	0.037555
ABAT_+_8807600.23-P2	18	17	20	5
ABAT_+_8807610.23-P2	266	261	243	242	0.0249219	0.0709571	0.0479395
ABAT_+_8807696.23-P2	836	836	924	843	-0.0443123	0.0296355	-0.0073384
ABAT_+_8807706.23-P2	418	352	440	338	-0.026582	0.0537249	0.0135714
ABAT_+_8807798.23-P2	809	905	807	987	-0.00704252	-0.00896609	-0.0080043
ABAT_-_8768466.23-P1	444	728	391	537	0.0382522	0.183576	0.110914
ABAT_-_8768504.23-P1	181	233	160	184	0.0368735	0.149995	0.0934344
ABAT_-_8768523.23-P1	664	747	668	701	-0.0101246	0.065036	0.0274557
ABAT_-_8768530.23-P1	447	457	407	428	0.026125	0.0660222	0.0460736
ABAT_-_8768533.23-P1	254	246	207	187	0.0664151	0.168765	0.11759
ABCA10_+_67224502.23-P1P2	802	605	601	680	0.0969036	-0.0238013	0.0365511
ABCA10_+_67224811.23-P1P2	584	814	773	919	-0.109831	-0.0259981	-0.0679146
ABCA10_+_67224827.23-P1P2	343	514	390	512	-0.0546084	0.0356608	-0.0094738
ABCA10_+_67224916.23-P1P2	158	153	197	249	-0.0881111	-0.206059	-0.147085
ABCA10_+_67224929.23-P1P2	376	397	472	546	-0.0905753	-0.123174	-0.106875
ABCA10_-_67224447.23-P1P2	573	485	487	567	0.0511545	-0.0431749	0.00398984
ABCA10_-_67224767.23-P1P2	1145	1244	1075	1092	0.0149826	0.0979097	0.0564461
ABCA10_-_67224823.23-P1P2	204	229	134	281	0.144787	-0.0670174	0.0388851
ABCA10_-_67224857.23-P1P2	423	419	370	392	0.0407059	0.0665386	0.0536223
ABCA10_-_67224969.23-P1P2	625	692	618	752	-0.00384899	-0.00720101	-0.005525
ABCA12_+_216002868.23-P1P2	1056	914	1061	1126	-0.0096586	-0.068969	-0.0393138
ABCA12_+_216002883.23-P1P2	679	803	668	939	-0.00200664	-0.0432981	-0.0226524
ABCA12_+_216002996.23-P1P2	282	481	426	452	-0.157856	0.0643603	-0.0467478
ABCA12_+_216003308.23-P1P2	338	292	290	337	0.047718	-0.0368323	0.00544287
ABCA12_+_216003314.23-P1P2	1230	1256	1166	1370	0.0114762	-0.00903678	0.00121973
ABCA12_+_216003317.23-P1P2	1170	1421	1174	1380	-0.0091823	0.048157	0.0194873
ABCA12_+_216003325.23-P1P2	902	938	816	812	0.0284706	0.104768	0.0666193
ABCA12_+_216003340.23-P1P2	445	566	442	486	-0.00548385	0.108774	0.051645
ABCA12_-_216002923.23-P1P2	393	304	412	325	-0.0250995	0.000850941	-0.0121243
ABCA12_-_216003059.23-P1P2	124	123	224	175	-0.222843	-0.139875	-0.181359
ABCA13_+_48211090.23-P1P2	335	346	264	341	0.0786129	0.0409085	0.0597607
ABCA13_+_48211097.23-P1P2	343	170	199	339	0.189902	-0.306105	-0.0581018
ABCA13_+_48211145.23-P1P2	305	419	312	413	-0.0161881	0.040843	0.0123275
ABCA13_+_48211160.23-P1P2	350	461	367	446	-0.0251776	0.0500289	0.0124257
ABCA13_+_48211170.23-P1P2	773	805	762	1058	-0.00273361	-0.100825	-0.0517793
ABCA13_-_48211093.23-P1P2	594	671	619	869	-0.0229235	-0.0935774	-0.0582504
ABCA13_-_48211142.23-P1P2	687	918	728	981	-0.0290071	0.00105893	-0.0139741
ABCA13_-_48211206.23-P1P2	583	619	615	780	-0.0273603	-0.0800932	-0.0537267
ABCA13_-_48211352.23-P1P2	741	924	612	805	0.0615647	0.101627	0.0815956
ABCA13_-_48211482.23-P1P2	255	402	230	451	0.029555	-0.0228909	0.00333208
ABCA1_+_107689930.23-P1P2	178	174	179	260	-0.00997788	-0.164015	-0.0869962
ABCA1_+_107689978.23-P1P2	295	456	217	368	0.10365	0.139314	0.121482
ABCA1_+_107690410.23-P1P2	227	387	359	287	-0.174514	0.180937	0.00321124
ABCA1_-_107689997.23-P1P2	114	140	136	90	-0.0720662	0.251294	0.0896139
ABCA1_-_107690031.23-P1P2	766	1009	706	1092	0.0216993	-0.0051826	0.00825837
ABCA1_-_107690202.23-P1P2	450	324	249	340	0.207116	0.0100071	0.108561
ABCA1_-_107690338.23-P1P2	184	281	157	346	0.0497258	-0.0687168	-0.00949551
ABCA1_-_107690385.23-P1P2	10	1	4	13
ABCA1_-_107690389.23-P1P2	110	230	133	244	-0.0769402	0.00464654	-0.0361468
ABCA1_-_107690394.23-P1P2	381	445	349	627	0.0239381	-0.135085	-0.0555734
ABCA2_+_139922190.23-P1P2	354	413	346	413	0.000364606	0.0337412	0.0170529
ABCA2_+_139922193.23-P1P2	208	179	223	189	-0.0332469	0.0069744	-0.0131362
ABCA2_+_139922201.23-P1P2	291	260	334	271	-0.0580249	0.013338	-0.0223434
ABCA2_+_139922272.23-P1P2	494	562	432	584	0.0407934	0.0148339	0.0278137
ABCA2_+_139922290.23-P1P2	130	188	150	216	-0.0599448	-0.0346201	-0.0472824
ABCA2_+_139922669.23-P1P2	454	427	412	340	0.0273345	0.145926	0.0866302
ABCA2_-_139922262.23-P1P2	302	457	332	453	-0.0423588	0.0380699	-0.00214447
ABCA2_-_139922304.23-P1P2	129	240	197	227	-0.161802	0.0611617	-0.0503202
ABCA2_-_139922347.23-P1P2	376	314	415	331	-0.0438057	0.00777986	-0.0180129
ABCA2_-_139922596.23-P1P2	511	431	488	612	0.00879403	-0.138902	-0.0650539
ABCA3_+_2390336.23-P1P2	149	149	138	194	0.019928	-0.0962057	-0.0381388
ABCA3_+_2390611.23-P1P2	149	105	56	102	0.347679	0.0480143	0.197846
ABCA3_+_2390721.23-P1P2	263	263	227	161	0.0455518	0.27538	0.160466
ABCA3_-_2390323.23-P1P2	507	434	426	534	0.0553155	-0.068356	-0.00652025
ABCA3_-_2390333.23-P1P2	178	149	135	173	0.0925411	-0.0397946	0.0263733
ABCA3_-_2390500.23-P1P2	135	172	158	124	-0.0651121	0.194857	0.0648723
ABCA3_-_2390670.23-P1P2	160	128	210	159	-0.106763	-0.0730448	-0.0899037
ABCA3_-_2390673.23-P1P2	386	337	310	341	0.0717387	0.0279312	0.049835
ABCA3_-_2390704.23-P1P2	95	110	109	146	-0.0578989	-0.105667	-0.0817827
ABCA3_-_2390733.23-P1P2	323	412	236	409	0.1061	0.0373396	0.0717199
ABCA4_+_94586620.23-P1P2	304	300	282	292	0.0193568	0.0470498	0.0332033
ABCA4_+_94586668.23-P1P2	133	140	115	120	0.0449024	0.109643	0.0772727
ABCA4_+_94586689.23-P1P2	200	210	158	207	0.0777193	0.040826	0.0592727
ABCA4_-_94586219.23-P1P2	99	145	110	156	-0.04623	-0.0022633	-0.0242466
ABCA4_-_94586232.23-P1P2	478	557	447	413	0.0164247	0.181023	0.0987238
ABCA4_-_94586250.23-P1P2	253	347	293	241	-0.0612829	0.21323	0.0759736
ABCA4_-_94586284.23-P1P2	424	676	447	767	-0.0271386	-0.0284443	-0.0277914
ABCA4_-_94586293.23-P1P2	889	903	1067	917	-0.0742657	0.0261658	-0.0240499
ABCA4_-_94586628.23-P1P2	614	744	658	801	-0.0330929	-0.00260682	-0.0178499
ABCA4_-_94586658.23-P1P2	260	292	260	327	-0.00794202	-0.0220002	-0.0149711
ABCA5_+_67322884.23-P1P2	440	636	469	505	-0.0311371	0.147305	0.0580842
ABCA5_+_67323191.23-P1P2	121	74	152	100	-0.0908298	-0.114519	-0.102674
ABCA5_+_67323221.23-P1P2	135	133	132	70	0.000224595	0.349782	0.175003
ABCA5_-_67322845.23-P1P2	529	547	445	406	0.0548948	0.18052	0.117707
ABCA5_-_67322851.23-P1P2	269	373	319	386	-0.0698942	0.0168725	-0.0265109
ABCA5_-_67322872.23-P1P2	1035	939	889	890	0.0473163	0.0601302	0.0537232
ABCA5_-_67322891.23-P1P2	50	37	96	20	-0.244997
ABCA5_-_67323220.23-P1P2	352	370	373	316	-0.029	0.111421	0.0412103
ABCA5_-_67323267.23-P1P2	481	482	400	513	0.0590698	0.00304982	0.0310598
ABCA5_-_67323280.23-P1P2	330	399	306	335	0.0194974	0.119826	0.0696615
ABCA6_+_67137671.23-P1P2	447	451	482	456	-0.0353371	0.0283124	-0.00351235
ABCA6_+_67137842.23-P1P2	455	541	379	501	0.0584733	0.071563	0.0650181
ABCA6_+_67138008.23-P1P2	152	248	186	299	-0.0813	-0.0583426	-0.0698213
ABCA6_+_67138026.23-P1P2	436	559	588	557	-0.116629	0.035506	-0.0405616
ABCA6_+_67138050.23-P1P2	401	349	322	341	0.0717914	0.0451594	0.0584754
ABCA6_+_67138055.23-P1P2	423	635	389	575	0.0225082	0.0826131	0.0525606
ABCA6_-_67137744.23-P1P2	327	356	311	320	0.0102887	0.0862345	0.0482616
ABCA6_-_67137748.23-P1P2	362	447	462	422	-0.0965826	0.0620797	-0.0172515
ABCA6_-_67137854.23-P1P2	365	354	359	512	-0.00191869	-0.147963	-0.0749411
ABCA6_-_67137948.23-P1P2	567	476	538	584	0.0111367	-0.0669437	-0.0279035
ABCA7_+_1040413.23-P1	1072	1011	1092	1097	-0.0146594	-0.00645695	-0.0105582
ABCA7_+_1040474.23-P1	328	370	232	321	0.117895	0.103691	0.110793
ABCA7_+_1040513.23-P1	581	1076	775	786	-0.112642	0.188375	0.0378666
ABCA7_+_1040541.23-P1	1227	1398	1309	1365	-0.0314508	0.0455034	0.00702632
ABCA7_+_1040560.23-P1	380	482	478	470	-0.0913202	0.046155	-0.0225826
ABCA7_+_1040577.23-P1	738	687	620	677	0.055371	0.0409611	0.048166
ABCA7_+_1041292.23-P2	549	618	584	595	-0.030401	0.052416	0.0110075
ABCA7_+_1041297.23-P2	598	682	433	579	0.109383	0.114358	0.11187
ABCA7_+_1041311.23-P2	380	511	520	611	-0.121925	-0.0542619	-0.0880934
ABCA7_+_1041348.23-P2	331	367	352	304	-0.0302957	0.126475	0.0480894
ABCA7_+_1041432.23-P2	441	339	354	466	0.0719142	-0.122929	-0.0255076
ABCA7_+_1041489.23-P2	644	553	618	523	0.00703376	0.0612048	0.0341193
ABCA7_+_1041673.23-P2	455	490	580	634	-0.0961502	-0.0931193	-0.0946347
ABCA7_-_1040133.23-P1	78	143	96	138	-0.083398	0.0512657	-0.0160662
ABCA7_-_1040209.23-P1	461	363	472	468	-0.0165113	-0.0913575	-0.0539344
ABCA7_-_1040214.23-P1	276	351	346	306	-0.090084	0.101297	0.00560662
ABCA7_-_1040526.23-P1	441	389	444	686	-0.0104058	-0.245589	-0.127998
ABCA7_-_1041459.23-P2	850	876	853	897	-0.00922235	0.0220766	0.00642714
ABCA7_-_1041690.23-P2	295	549	272	573	0.0215563	0.0126733	0.0171148
ABCA7_-_1041717.23-P2	1114	964	1122	1101	-0.0105424	-0.0316887	-0.0211155
ABCA8_+_66950951.23-P1P2	423	538	409	418	0.00428891	0.158008	0.0811487
ABCA8_+_66950959.23-P1P2	948	1083	975	1017	-0.0181474	0.0647014	0.023277
ABCA8_+_66951172.23-P1P2	81	124	77	111	0.0104619	0.0882738	0.0493678
ABCA8_+_66951401.23-P1P2	97	147	155	167	-0.178272	-0.0290684	-0.10367
ABCA8_-_66951365.23-P1P2	308	447	306	460	-0.00557459	0.0196255	0.00702544
ABCA8_-_66951372.23-P1P2	499	527	539	606	-0.0359635	-0.0350352	-0.0354994
ABCA8_-_66951390.23-P1P2	413	425	417	333	-0.0114447	0.153857	0.0712064
ABCA8_-_66951447.23-P1P2	247	249	334	212	-0.117599	0.11295	-0.00232442
ABCA8_-_66951525.23-P1P2	814	792	877	964	-0.0350322	-0.0630277	-0.0490299
ABCA8_-_66951528.23-P1P2	485	527	475	713	-0.000370933	-0.115098	-0.0577345
ABCA9_+_67056924.23-P1P2	839	866	821	833	-6.08e-05	0.0528711	0.0264051
ABCA9_+_67056982.23-P1P2	336	378	359	384	-0.0320031	0.0259869	-0.00300812
ABCA9_+_67057085.23-P1P2	483	689	600	671	-0.086768	0.0467757	-0.0199962
ABCA9_-_67056649.23-P1P2	244	310	293	344	-0.0744457	-0.0175013	-0.0459735
ABCA9_-_67056810.23-P1P2	296	396	347	432	-0.0657099	-0.00910213	-0.037406
ABCA9_-_67056917.23-P1P2	545	685	619	805	-0.0542098	-0.0457417	-0.0499758
ABCA9_-_67056936.23-P1P2	277	297	304	550	-0.0417419	-0.269661	-0.155701
ABCA9_-_67057012.23-P1P2	280	285	420	448	-0.155288	-0.188968	-0.172128
ABCA9_-_67057053.23-P1P2	236	356	263	379	-0.0473062	0.00291503	-0.0221956
ABCA9_-_67057069.23-P1P2	363	439	294	555	0.0686709	-0.0817083	-0.00651867
ABCB10_+_229694012.23-P1P2	120	160	112	198	0.0171299	-0.0711832	-0.0270266
ABCB10_+_229694285.23-P1P2	0	0	5	0
ABCB10_+_229694391.23-P1P2	315	339	316	283	-0.00909384	0.122643	0.0567747
ABCB10_+_229694413.23-P1P2	291	433	303	375	-0.0226268	0.104552	0.0409627
ABCB10_-_229694283.23-P1P2	667	826	738	812	-0.0447012	0.0421583	-0.00127148
ABCB10_-_229694290.23-P1P2	292	340	321	356	-0.0423513	0.0110987	-0.0156263
ABCB10_-_229694297.23-P1P2	58	34	30	56	0.231627	-0.211956	0.00983578
ABCB10_-_229694400.23-P1P2	145	213	150	174	-0.0202618	0.13332	0.0565291
ABCB10_-_229694457.23-P1P2	376	471	358	528	0.00988495	-0.0225083	-0.00631166
ABCB10_-_229694467.23-P1P2	432	459	429	341	-0.00540962	0.180063	0.0873266
ABCB11_+_169887409.23-P1P2	535	592	602	497	-0.0508198	0.119868	0.0345241
ABCB11_+_169887589.23-P1P2	262	276	226	266	0.0457718	0.0519125	0.0488422
ABCB11_+_169887604.23-P1P2	366	503	426	454	-0.0631082	0.0842074	0.0105496
ABCB11_+_169887776.23-P1P2	117	234	122	119	-0.0231492	0.366692	0.171772
ABCB11_+_169887811.23-P1P2	611	874	845	891	-0.12577	0.0242558	-0.0507573
ABCB11_+_169887815.23-P1P2	676	708	661	977	0.000212377	-0.124829	-0.0623081
ABCB11_-_169887416.23-P1P2	622	729	613	827	-0.00264542	-0.0283641	-0.0155048
ABCB11_-_169887692.23-P1P2	273	375	295	289	-0.0361068	0.162008	0.0629505
ABCB11_-_169887784.23-P1P2	880	901	1027	1018	-0.0640782	-0.0263744	-0.0452263
ABCB11_-_169887796.23-P1P2	466	462	408	529	0.0403604	-0.0329397	0.00371039
ABCB1_+_87342475.23-ENST00000265724.3	123	221	245	220	-0.258351	0.0359742	-0.111188
ABCB1_+_87342641.23-ENST00000265724.3	341	540	494	454	-0.142637	0.119157	-0.0117402
ABCB1_-_87342245.23-ENST00000265724.3	71	74	128	85	-0.222112	-0.0344969	-0.128304
ABCB1_-_87342256.23-ENST00000265724.3	727	716	715	790	-0.00189363	-0.0146865	-0.00829006
ABCB1_-_87342302.23-ENST00000265724.3	175	302	186	312	-0.0300951	0.0177011	-0.00619701
ABCB1_-_87342654.23-ENST00000265724.3	690	723	719	657	-0.0229031	0.0808751	0.028986
ABCB1_-_87342657.23-ENST00000265724.3	454	378	443	413	0.000971225	-0.0098614	-0.00444509
ABCB1_-_87342674.23-ENST00000265724.3	376	541	466	594	-0.0859262	-0.0122774	-0.0491018
ABCB1_-_87342678.23-ENST00000265724.3	178	153	235	191	-0.108895	-0.0754878	-0.0921914
ABCB1_-_87342682.23-ENST00000265724.3	305	367	293	292	0.00664452	0.146305	0.0764747
ABCB4_+_87104635.23-P1P2	35	67	84	104	-0.326087	-0.182761	-0.254424
ABCB4_+_87104755.23-P1P2	220	209	268	192	-0.0796623	0.0755148	-0.00207376
ABCB4_+_87104897.23-P1P2	338	315	408	326	-0.0763415	0.0168401	-0.0297507
ABCB4_+_87104933.23-P1P2	671	641	637	623	0.0109545	0.0477658	0.0293602
ABCB4_+_87104939.23-P1P2	562	625	541	644	0.00589715	0.0189956	0.0124464
ABCB4_+_87104948.23-P1P2	127	172	118	208	0.0187687	-0.0598339	-0.0205326
ABCB4_+_87105008.23-P1P2	475	421	326	613	0.128848	-0.151265	-0.0112084
ABCB4_-_87104608.23-P1P2	268	310	258	332	0.0058771	-1.82e-05	0.00292944
ABCB4_-_87104975.23-P1P2	354	472	454	628	-0.0983559	-0.106866	-0.102611
ABCB4_-_87104991.23-P1P2	43	19	16	22
ABCB5_+_20687051.23-P1P2	257	327	227	389	0.0371653	-0.0517467	-0.00729071
ABCB5_+_20687204.23-P1P2	421	419	344	395	0.0654614	0.0627847	0.0641231
ABCB5_+_20687218.23-P1P2	75	73	62	74	0.0612324	0.0270419	0.0441372
ABCB5_+_20687242.23-P1P2	708	849	687	781	0.00299986	0.0748477	0.0389238
ABCB5_+_20687409.23-P1P2	72	93	59	156	0.0644212	-0.220949	-0.0782641
ABCB5_+_20687450.23-P1P2	521	442	794	545	-0.161054	-0.0694021	-0.115228
ABCB5_-_20687157.23-P1P2	414	522	415	451	-0.00881874	0.105728	0.0484548
ABCB5_-_20687194.23-P1P2	585	565	538	476	0.0224939	0.11814	0.0703171
ABCB5_-_20687236.23-P1P2	476	535	360	551	0.0935604	0.0192315	0.0563959
ABCB5_-_20687396.23-P1P2	770	849	546	832	0.116984	0.0437006	0.0803424
ABCB6_+_220083287.23-P1P2	102	135	109	83	-0.0320627	0.273255	0.120596
ABCB6_+_220083500.23-P1P2	412	319	400	384	0.00279962	-0.0575728	-0.0273866
ABCB6_+_220083584.23-P1P2	312	276	331	322	-0.0294244	-0.0421607	-0.0357926
ABCB6_+_220083613.23-P1P2	399	361	263	315	0.143525	0.100856	0.122191
ABCB6_+_220083669.23-P1P2	383	328	388	390	-0.0126554	-0.0515074	-0.0320814
ABCB6_-_220083181.23-P1P2	213	286	160	374	0.0960332	-0.0983486	-0.00115773
ABCB6_-_220083194.23-P1P2	259	199	258	215	-0.00653622	-0.00433672	-0.00543647
ABCB6_-_220083298.23-P1P2	108	132	125	143	-0.0610646	-0.00567084	-0.0333677
ABCB6_-_220083468.23-P1P2	813	799	682	765	0.0559078	0.0551527	0.0555302
ABCB6_-_220083604.23-P1P2	437	491	334	435	0.0897369	0.0933684	0.0915526
ABCB7_+_74375695.23-P1P2	8	22	21	70		-0.536174
ABCB7_+_74375720.23-P1P2	60	20	53	0	0.0371386
ABCB7_+_74375885.23-P1P2	8	13	8	12
ABCB7_+_74375896.23-P1P2	21	16	35	14
ABCB7_+_74376070.23-P1P2	27	93	6	126		-0.115788
ABCB7_-_74375871.23-P1P2	47	27	45	48
ABCB7_-_74375964.23-P1P2	81	64	46	58	0.197672	0.0822118	0.139942
ABCB7_-_74376019.23-P1P2	10	24	10	34
ABCB7_-_74376036.23-P1P2	15	32	25	16
ABCB7_-_74376044.23-P1P2	13	10	11	13
ABCB8_+_150725531.23-P1P2	66	86	98	27	-0.151598	0.604177	0.226289
ABCB8_+_150725592.23-P1P2	458	416	490	582	-0.0324846	-0.131595	-0.0820399
ABCB8_+_150725958.23-P1P2	333	278	267	368	0.0723306	-0.104355	-0.016012
ABCB8_+_150725965.23-P1P2	205	324	294	431	-0.138973	-0.106769	-0.122871
ABCB8_-_150725551.23-P1P2	124	70	151	103	-0.079531	-0.156435	-0.117983
ABCB8_-_150725580.23-P1P2	600	678	706	889	-0.0670618	-0.0996712	-0.0833665
ABCB8_-_150725890.23-P1P2	144	223	131	221	0.0264414	0.0381771	0.0323092
ABCB8_-_150725928.23-P1P2	192	234	245	295	-0.0965253	-0.0803224	-0.0884239
ABCB8_-_150725938.23-P1P2	57	126	67	99	-0.0666824	0.152486	0.042902
ABCB8_-_150725975.23-P1P2	559	594	479	745	0.0481846	-0.077787	-0.0148012
ABCB9_+_123450501.23-P1	536	678	510	676	0.0101274	0.0351958	0.0226616
ABCB9_+_123450542.23-P1	390	375	462	383	-0.0695085	0.0233474	-0.0230805
ABCB9_+_123450546.23-P1	594	659	514	689	0.0446259	0.0118212	0.0282235
ABCB9_+_123450566.23-P1	709	737	684	751	0.00510314	0.0244756	0.0147893
ABCB9_+_123450826.23-P1	714	793	829	713	-0.062211	0.0861025	0.0119457
ABCB9_+_123450970.23-P1	674	569	384	686	0.196502	-0.0583339	0.069084
ABCB9_+_123465380.23-P2	122	94	214	186	-0.212156	-0.30229	-0.257223
ABCB9_+_123465415.23-P2	66	120	78	170	-0.0686494	-0.137761	-0.103205
ABCB9_+_123465727.23-P2	53	92	38	126	0.112963	-0.121111	-0.00407419
ABCB9_+_123465780.23-P2	374	422	453	524	-0.0775825	-0.072854	-0.0752183
ABCB9_-_123450530.23-P1	576	706	616	592	-0.0323404	0.120455	0.0440572
ABCB9_-_123450533.23-P1	133	173	143	238	-0.0342868	-0.12332	-0.0788035
ABCB9_-_123450551.23-P1	748	704	749	575	-0.00842753	0.133404	0.0624885
ABCB9_-_123450999.23-P1	158	213	104	141	0.144033	0.236867	0.19045
ABCB9_-_123465296.23-P2	306	391	174	459	0.197208	-0.0452095	0.0759991
ABCB9_-_123465398.23-P2	194	258	292	321	-0.156534	-0.0738364	-0.115185
ABCB9_-_123465422.23-P2	1714	1545	1384	1492	0.0697716	0.0509287	0.0603501
ABCB9_-_123465699.23-P2	465	346	423	517	0.0264592	-0.164004	-0.0687722
ABCB9_-_123465738.23-P2	511	485	428	595	0.0564692	-0.066909	-0.00521989
ABCB9_-_123465787.23-P2	453	789	581	697	-0.0983771	0.0947878	-0.00179463
ABCC10_+_43395315.23-P1P2	314	316	367	384	-0.064621	-0.0622253	-0.0634231
ABCC10_+_43395533.23-P1P2	229	235	312	314	-0.120335	-0.108956	-0.114645
ABCC10_+_43395536.23-P1P2	162	177	96	315	0.182206	-0.250082	-0.0339381
ABCC10_+_43395660.23-P1P2	282	332	312	319	-0.0446803	0.053409	0.00436438
ABCC10_-_43395326.23-P1P2	290	300	237	297	0.0653995	0.0386898	0.0520447
ABCC10_-_43395330.23-P1P2	149	199	203	188	-0.120327	0.0617397	-0.0292935
ABCC10_-_43395343.23-P1P2	234	242	256	238	-0.0405957	0.0419478	0.000676039
ABCC10_-_43395719.23-P1P2	262	239	159	216	0.173554	0.0835635	0.128559
ABCC10_-_43395891.23-P1P2	173	196	178	208	-0.018296	0.00448183	-0.00690707
ABCC10_-_43395984.23-P1P2	506	383	329	463	0.148494	-0.0596608	0.0444164
ABCC11_+_48277846.23-P1	726	726	608	901	0.056516	-0.0725925	-0.00803825
ABCC11_+_48278091.23-P1	203	210	169	269	0.0586717	-0.0881758	-0.0147521
ABCC11_+_48278130.23-P1	544	627	524	647	0.00567003	0.0182803	0.0119752
ABCC11_+_48278163.23-P1	98	127	144	117	-0.147795	0.0741234	-0.0368356
ABCC11_+_48281001.23-P2	808	737	586	750	0.108797	0.0251316	0.0669644
ABCC11_+_48281042.23-P2	546	503	326	457	0.179471	0.0809645	0.130218
ABCC11_+_48281160.23-P2	592	678	672	760	-0.0540035	-0.0224753	-0.0382394
ABCC11_+_48281175.23-P2	491	482	478	573	0.00180921	-0.0514131	-0.0248019
ABCC11_+_48281194.23-P2	556	723	407	558	0.105422	0.161294	0.133358
ABCC11_+_48281284.23-P2	575	378	474	393	0.0622532	0.0145797	0.0384164
ABCC11_+_48281345.23-P2	464	398	453	256	0.000776806	0.251019	0.125898
ABCC11_+_48281428.23-P2	851	743	778	901	0.0246497	-0.0611956	-0.018273
ABCC11_-_48277852.23-P1	742	720	604	700	0.0668365	0.0476122	0.0572243
ABCC11_-_48278103.23-P1	267	509	373	394	-0.129437	0.15984	0.0152015
ABCC11_-_48278122.23-P1	652	693	515	595	0.0777757	0.108815	0.0932953
ABCC11_-_48278125.23-P1	302	269	258	391	0.0492815	-0.15041	-0.0505642
ABCC11_-_48278197.23-P1	356	392	273	455	0.0885256	-0.0396421	0.0244417
ABCC11_-_48278200.23-P1	71	108	34	68	0.259636	0.261531	0.260584
ABCC11_-_48280980.23-P2	492	493	423	647	0.04697	-0.100108	-0.026569
ABCC11_-_48281374.23-P2	31	65	45	62		0.0570079
ABCC12_+_48180281.23-ENST00000311303.3	58	28	33	25	0.196992
ABCC12_+_48180331.23-ENST00000311303.3	118	82	115	186	0.00141641	-0.369538	-0.184061
ABCC12_+_48180353.23-ENST00000311303.3	172	188	108	221	0.161171	-0.0458881	0.0576413
ABCC12_+_48180599.23-ENST00000311303.3	173	171	91	180	0.225517	0.00848501	0.117001
ABCC12_+_48180636.23-ENST00000311303.3	581	730	646	793	-0.0464801	-0.007018	-0.026749
ABCC12_-_48180314.23-ENST00000311303.3	433	417	419	378	0.00400175	0.0820897	0.0430457
ABCC12_-_48180571.23-ENST00000311303.3	152	132	143	172	0.0142384	-0.0965901	-0.0411759
ABCC12_-_48180643.23-ENST00000311303.3	434	515	689	366	-0.175904	0.201908	0.013002
ABCC12_-_48180648.23-ENST00000311303.3	201	248	172	304	0.0486794	-0.0665084	-0.0089145
ABCC12_-_48180679.23-ENST00000311303.3	820	1052	734	1070	0.0323209	0.0253876	0.0288542
ABCC1_+_16043482.23-P1P2	283	464	324	442	-0.0571087	0.0576587	0.000275009
ABCC1_+_16043647.23-P1P2	321	296	275	288	0.0482649	0.0472321	0.0477485
ABCC1_+_16043887.23-P1P2	231	435	311	358	-0.116008	0.129665	0.00682836
ABCC1_+_16043921.23-P1P2	671	665	551	618	0.0636601	0.0698325	0.0667463
ABCC1_+_16043939.23-P1P2	332	368	328	297	-0.00353713	0.139285	0.0678738
ABCC1_-_16043841.23-P1P2	205	338	254	281	-0.0858273	0.124681	0.0194267
ABCC1_-_16043871.23-P1P2	556	402	432	313	0.0837591	0.156961	0.12036
ABCC1_-_16043934.23-P1P2	406	535	521	547	-0.0985727	0.022819	-0.0378768
ABCC1_-_16043999.23-P1P2	602	715	421	640	0.122018	0.0883048	0.105162
ABCC1_-_16044002.23-P1P2	519	500	546	590	-0.0263719	-0.047756	-0.0370639
ABCC2_+_101542376.23-P1P2	91	160	143	77	-0.172193	0.393858	0.110832
ABCC2_+_101542515.23-P1P2	466	583	581	704	-0.0880952	-0.0591187	-0.073607
ABCC2_+_101542910.23-P1P2	836	852	693	888	0.0602312	0.0133636	0.0367974
ABCC2_+_101542914.23-P1P2	853	1116	995	1037	-0.0638994	0.0698917	0.00299617
ABCC2_+_101542981.23-P1P2	866	854	666	722	0.0874849	0.116416	0.10195
ABCC2_-_101542463.23-P1P2	457	665	511	476	-0.0485287	0.19838	0.0749258
ABCC2_-_101542705.23-P1P2	292	354	266	350	0.0259477	0.0393365	0.0326421
ABCC2_-_101542708.23-P1P2	234	282	238	235	-0.0141015	0.123514	0.0547063
ABCC2_-_101542808.23-P1P2	17	21	38	24
ABCC2_-_101542903.23-P1P2	274	211	239	315	0.0417218	-0.163566	-0.0609219
ABCC3_+_48712245.23-P1P2	129	148	143	218	-0.0453839	-0.156952	-0.101168
ABCC3_+_48712248.23-P1P2	326	202	256	287	0.0798988	-0.139192	-0.0296468
ABCC3_+_48712270.23-P1P2	358	485	465	465	-0.102973	0.0544763	-0.0242481
ABCC3_+_48712294.23-P1P2	411	370	352	358	0.0483711	0.0499752	0.0491731
ABCC3_+_48712450.23-P1P2	8	16	7	13
ABCC3_+_48712559.23-P1P2	677	671	560	609	0.0610073	0.0814786	0.071243
ABCC3_+_48712662.23-P1P2	467	444	376	610	0.0708212	-0.122658	-0.0259184
ABCC3_+_48712738.23-P1P2	456	506	469	385	-0.0181572	0.168307	0.0750751
ABCC3_-_48712163.23-P1P2	228	283	268	285	-0.0666824	0.0302736	-0.0182044
ABCC3_-_48712673.23-P1P2	677	743	583	836	0.0463804	-0.0243273	0.0110265
ABCC4_+_95953430.23-P1P2	464	500	453	489	0.000776806	0.0446946	0.0227357
ABCC4_+_95953641.23-P1P2	536	421	402	392	0.0966014	0.0688834	0.0827424
ABCC4_+_95953668.23-P1P2	643	740	500	594	0.0834662	0.141954	0.11271
ABCC4_+_95953676.23-P1P2	558	488	521	463	0.0169904	0.059635	0.0383127
ABCC4_+_95953681.23-P1P2	858	919	819	790	0.00896331	0.108216	0.0585898
ABCC4_+_95953695.23-P1P2	205	259	268	288	-0.105325	-0.0185171	-0.0619209
ABCC4_-_95953458.23-P1P2	665	633	548	658	0.06238	0.0146688	0.0385244
ABCC4_-_95953561.23-P1P2	799	833	553	833	0.12579	0.0337412	0.0797656
ABCC4_-_95953614.23-P1P2	426	451	293	416	0.128066	0.0735173	0.100792
ABCC4_-_95953652.23-P1P2	124	192	108	115	0.0422617	0.286121	0.164191
ABCC5_+_183735202.23-P1P2	379	364	304	415	0.0721906	-0.0308229	0.0206838
ABCC5_+_183735246.23-P1P2	598	593	586	640	-0.000575571	-0.00381507	-0.00219532
ABCC5_+_183735252.23-P1P2	605	527	551	622	0.0260335	-0.0478669	-0.0109167
ABCC5_+_183735285.23-P1P2	790	690	581	745	0.103724	-0.0040213	0.0498514
ABCC5_+_183735648.23-P1P2	181	71	125	93	0.126582	-0.0991638	0.0137092
ABCC5_+_183735692.23-P1P2	188	228	174	200	0.0201802	0.0982578	0.059219
ABCC5_-_183735259.23-P1P2	252	273	317	350	-0.0913322	-0.0885981	-0.0899651
ABCC5_-_183735312.23-P1P2	690	800	653	805	0.0120865	0.0306733	0.0213799
ABCC5_-_183735467.23-P1P2	531	865	557	822	-0.0253137	0.0588476	0.0167669
ABCC5_-_183735588.23-P1P2	266	274	183	278	0.127973	0.026605	0.077289
ABCC6_+_16316894.23-ENST00000205557.7	319	459	239	417	0.0969814	0.0809926	0.088987
ABCC6_+_16316916.23-ENST00000205557.7	41	40	36	53		-0.104823
ABCC6_+_16317287.23-ENST00000205557.7	397	264	312	420	0.0796129	-0.194877	-0.0576321
ABCC6_+_16317296.23-ENST00000205557.7	530	566	517	512	0.00108268	0.0831126	0.0420976
ABCC6_-_16316877.23-ENST00000205557.7	201	207	135	205	0.136702	0.0385217	0.0876118
ABCC6_-_16317049.23-ENST00000205557.7	109	139	110	164	-0.0112608	-0.047696	-0.0294784
ABCC6_-_16317052.23-ENST00000205557.7	168	116	128	76	0.0908785	0.241951	0.166415
ABCC6_-_16317235.23-ENST00000205557.7	282	353	315	433	-0.0481578	-0.0668386	-0.0574982
ABCC6_-_16317247.23-ENST00000205557.7	290	416	344	453	-0.0699963	-0.00821361	-0.039105
ABCC6_-_16317344.23-ENST00000205557.7	251	229	217	360	0.0449528	-0.189006	-0.0720266
ABCC8_+_17497824.23-P1P2	134	173	232	240	-0.207411	-0.127441	-0.167426
ABCC8_+_17497953.23-P1P2	680	589	539	759	0.0765037	-0.0911162	-0.00730628
ABCC8_+_17498249.23-P1P2	175	157	206	204	-0.0672089	-0.0952024	-0.0812056
ABCC8_+_17498387.23-P1P2	405	448	349	517	0.0461373	-0.0367931	0.00467208
ABCC8_+_17498394.23-P1P2	127	161	112	174	0.037733	-0.00449316	0.0166199
ABCC8_-_17497979.23-P1P2	880	1086	901	1069	-0.0165122	0.0415099	0.0124988
ABCC8_-_17497997.23-P1P2	211	303	301	319	-0.13704	0.00840376	-0.0643183
ABCC8_-_17498066.23-P1P2	392	301	323	272	0.0624155	0.0836241	0.0730198
ABCC8_-_17498220.23-P1P2	528	592	454	603	0.0469309	0.0246761	0.0358035
ABCC8_-_17498282.23-P1P2	62	83	99	45	-0.178008	0.33517	0.0785812
ABCC9_+_22093672.23-P1P2	124	173	55	121	0.287483	0.20977	0.248626
ABCC9_+_22093678.23-P1P2	510	514	492	713	0.00511564	-0.127397	-0.0611405
ABCC9_+_22093937.23-P1P2	208	220	265	233	-0.0959543	0.00547277	-0.0452408
ABCC9_+_22093941.23-P1P2	49	93	88	124	-0.220718	-0.10791	-0.164314
ABCC9_+_22094148.23-P1P2	376	394	420	408	-0.0481578	0.0165489	-0.0158045
ABCC9_+_22094152.23-P1P2	628	574	554	630	0.0376193	-0.0120954	0.012762
ABCC9_+_22094309.23-P1P2	381	264	229	283	0.177056	-0.000478659	0.0882888
ABCC9_-_22093906.23-P1P2	357	429	330	455	0.0206368	0.00476886	0.0127028
ABCC9_-_22094032.23-P1P2	569	549	518	593	0.0261831	-0.0042199	0.0109816
ABCC9_-_22094122.23-P1P2	317	388	245	376	0.0856855	0.0492101	0.0674478
ABCD1_+_152990414.23-P1P2	595	741	665	765	-0.0483613	0.0180462	-0.0151576
ABCD1_+_152990694.23-P1P2	171	252	185	185	-0.0365387	0.185925	0.0746931
ABCD1_+_152990711.23-P1P2	430	522	397	564	0.021075	-0.00436304	0.00835599
ABCD1_-_152990333.23-P1P2	344	352	446	384	-0.102309	-0.00910213	-0.0557053
ABCD1_-_152990338.23-P1P2	206	167	166	217	0.0705117	-0.0952168	-0.0123526
ABCD1_-_152990342.23-P1P2	314	401	365	365	-0.0626352	0.0800571	0.00871097
ABCD1_-_152990379.23-P1P2	168	274	210	204	-0.0890322	0.178999	0.0449836
ABCD1_-_152990498.23-P1P2	630	590	508	588	0.0702754	0.0354131	0.0528443
ABCD1_-_152990703.23-P1P2	544	604	490	682	0.0300491	-0.026062	0.00199359
ABCD1_-_152990727.23-P1P2	295	361	231	350	0.08093	0.048978	0.064954
ABCD2_+_40013099.23-P1P2	344	359	384	299	-0.0479163	0.123788	0.0379361
ABCD2_+_40013295.23-P1P2	494	432	395	527	0.0733321	-0.0641331	0.00459951
ABCD2_+_40013504.23-P1P2	514	451	386	671	0.0961304	-0.161885	-0.0328774
ABCD2_+_40013514.23-P1P2	774	991	663	922	0.048311	0.0692764	0.0587937
ABCD2_+_40013594.23-P1P2	829	837	883	848	-0.0308744	0.0273123	-0.00178103
ABCD2_-_40013191.23-P1P2	145	207	283	275	-0.250952	-0.106123	-0.178537
ABCD2_-_40013313.23-P1P2	578	723	534	795	0.0208312	-0.0130026	0.00391432
ABCD2_-_40013342.23-P1P2	398	589	395	656	-0.00519246	-0.019306	-0.0122492
ABCD2_-_40013373.23-P1P2	0	1	0	0
ABCD2_-_40013610.23-P1P2	928	798	739	787	0.0748163	0.0405757	0.057696
ABCD3_+_94884002.23-P1P2	576	637	723	808	-0.0905432	-0.0833448	-0.086944
ABCD3_+_94884009.23-P1P2	430	603	450	499	-0.024463	0.126956	0.0512463
ABCD3_+_94884032.23-P1P2	588	686	631	833	-0.0335903	-0.0618588	-0.0477246
ABCD3_+_94884210.23-P1P2	197	283	114	234	0.190839	0.127357	0.159098
ABCD3_+_94884219.23-P1P2	338	409	368	455	-0.0388444	-0.0187386	-0.0287915
ABCD3_+_94884473.23-P1P2	324	293	283	368	0.0412247	-0.078479	-0.0186272
ABCD3_-_94883974.23-P1P2	193	222	193	247	-0.00794202	-0.018802	-0.013372
ABCD3_-_94884061.23-P1P2	271	151	267	196	-0.00253822	-0.0946906	-0.0486144
ABCD3_-_94884365.23-P1P2	357	285	212	326	0.181443	-0.0324397	0.0745018
ABCD3_-_94884436.23-P1P2	143	73	133	100	0.0184028	-0.121218	-0.0514078
ABCD4_+_74769232.23-P1P2	49	73	51	112	-0.0224799	-0.17702	-0.09975
ABCD4_+_74769429.23-P1P2	146	127	131	124	0.0314538	0.045512	0.0384829
ABCD4_+_74769611.23-P1P2	497	468	372	487	0.0973333	0.0141462	0.0557398
ABCD4_+_74769625.23-P1P2	445	535	339	475	0.0909295	0.0923116	0.0916206
ABCD4_+_74769649.23-P1P2	239	354	259	390	-0.0371464	-0.0139465	-0.0255464
ABCD4_-_74769174.23-P1P2	286	272	184	308	0.152337	-0.0274614	0.062438
ABCD4_-_74769631.23-P1P2	718	812	698	921	0.00232417	-0.0282798	-0.0129778
ABCD4_-_74769666.23-P1P2	237	244	211	275	0.0342857	-0.0251498	0.00456797
ABCD4_-_74769682.23-P1P2	384	453	430	462	-0.049058	0.0240546	-0.0125017
ABCD4_-_74769729.23-P1P2	531	431	447	534	0.0546366	-0.0717714	-0.00856742
ABCE1_+_146019317.23-P1P2	37	54	17	80		-0.159788
ABCE1_+_146019463.23-P1P2	7	24	10	16
ABCE1_+_146019466.23-P1P2	170	171	183	165	-0.0347201	0.0513283	0.00830411
ABCE1_+_146019482.23-P1P2	26	74	29	79		0.00154753
ABCE1_+_146019651.23-P1P2	0	0	0	0
ABCE1_+_146019792.23-P1P2	4	27	17	24
ABCE1_+_146019842.23-P1P2	61	140	141	211	-0.312429	-0.168244	-0.240337
ABCE1_-_146019439.23-P1P2	39	53	6	10		0.854899
ABCE1_-_146019502.23-P1P2	0	8	0	5
ABCE1_-_146019516.23-P1P2	5	85	3	57		0.230499
ABCF1_+_30539238.23-P1	17	47	27	26
ABCF1_+_30539434.23-P1	171	235	177	378	-0.0204743	-0.200295	-0.110385
ABCF1_+_30539469.23-P1	83	136	210	281	-0.345274	-0.323584	-0.334429
ABCF1_+_30539647.23-P1	268	291	361	401	-0.116195	-0.124137	-0.120166
ABCF1_+_30539664.23-P1	262	236	257	253	-0.000939895	-0.000508148	-0.000724022
ABCF1_+_30546312.23-P2	113	204	169	225	-0.154214	-0.0145031	-0.0843587
ABCF1_+_30546315.23-P2	611	435	569	412	0.017938	0.060489	0.0392135
ABCF1_+_30546387.23-P2	619	675	615	585	-0.00558611	0.104202	0.0493081
ABCF1_+_30546397.23-P2	159	214	203	258	-0.0967211	-0.0583272	-0.0775241
ABCF1_+_30546405.23-P2	197	248	161	239	0.0653917	0.0519424	0.058667
ABCF1_-_30539219.23-P1	198	197	221	197	-0.047878	0.0337412	-0.00706842
ABCF1_-_30539232.23-P1	628	562	574	504	0.0247315	0.0873748	0.0560531
ABCF1_-_30539559.23-P1	381	379	429	291	-0.0510621	0.163836	0.0563871
ABCF1_-_30539602.23-P1	157	83	117	94	0.0989235	-0.0275385	0.0356925
ABCF1_-_30539728.23-P1	170	218	392	306	-0.311549	-0.133222	-0.222386
ABCF1_-_30546344.23-P2	354	489	552	488	-0.169383	0.0347491	-0.0673167
ABCF1_-_30546354.23-P2	856	930	847	1043	-0.00410101	-0.0227218	-0.0134114
ABCF1_-_30546366.23-P2	591	813	644	846	-0.0391517	0.0141499	-0.0125009
ABCF1_-_30546413.23-P2	297	293	224	267	0.0945678	0.0794958	0.0870318
ABCF1_-_30546502.23-P2	179	148	108	312	0.175667	-0.333477	-0.0789049
ABCF2_+_150923872.23-P1P2	558	574	632	563	-0.0531963	0.0432688	-0.00496377
ABCF2_+_150923902.23-P1P2	55	101	58	89	-0.0272421	0.0960204	0.0343891
ABCF2_+_150923936.23-P1P2	102	138	110	151	-0.0353814	-0.0105866	-0.022984
ABCF2_+_150923959.23-P1P2	163	328	175	347	-0.0337564	0.00601427	-0.0138711
ABCF2_+_150924059.23-P1P2	72	55	131	154	-0.225448	-0.47323	-0.349339
ABCF2_+_150924236.23-P1P2	209	176	205	212	-0.000919598	-0.0578932	-0.0294064
ABCF2_+_150924287.23-P1P2	520	402	498	498	0.00776727	-0.0717026	-0.0319677
ABCF2_+_150924296.23-P1P2	275	356	407	420	-0.15041	-0.0476623	-0.099036
ABCF2_+_150924331.23-P1P2	153	206	205	163	-0.114262	0.149022	0.0173797
ABCF2_-_150923882.23-P1P2	328	447	357	400	-0.03873	0.0884425	0.0248562
ABCF3_+_183904140.23-P1P2	101	96	139	300	-0.123995	-0.527302	-0.325648
ABCF3_-_183903980.23-P1P2	572	568	660	734	-0.0599448	-0.0925008	-0.0762228
ABCF3_-_183903991.23-P1P2	266	424	389	407	-0.146064	0.0538898	-0.0460871
ABCF3_-_183904021.23-P1P2	493	762	531	702	-0.0349255	0.0741234	0.019599
ABCF3_-_183904044.23-P1P2	333	345	275	334	0.0616022	0.0496962	0.0556492
ABCF3_-_183904344.23-P1P2	227	215	212	210	0.0169013	0.0453273	0.0311143
ABCF3_-_183904356.23-P1P2	468	527	364	647	0.0833855	-0.06727	0.00805773
ABCF3_-_183904380.23-P1P2	238	156	189	223	0.0758301	-0.142197	-0.0331832
ABCF3_-_183904399.23-P1P2	133	97	212	91	-0.177372	0.0651808	-0.0560957
ABCF3_-_183904495.23-P1P2	144	151	123	214	0.0493402	-0.137952	-0.0443061
ABCG1_+_43639503.23-P1P2	91	125	106	120	-0.0633893	0.0538414	-0.00477396
ABCG1_+_43639544.23-P1P2	468	685	480	497	-0.0171425	0.191713	0.0872854
ABCG1_+_43639681.23-P1P2	46	20	43	18
ABCG1_-_43639282.23-P1P2	375	589	615	609	-0.187714	0.0172993	-0.0852075
ABCG1_-_43639541.23-P1P2	482	428	452	596	0.0154107	-0.129297	-0.0569431
ABCG1_-_43639554.23-P1P2	302	287	390	236	-0.10087	0.130077	0.0146033
ABCG1_-_43639626.23-P1P2	212	240	150	252	0.117776	0.00971752	0.0637469
ABCG1_-_43639644.23-P1P2	340	451	379	457	-0.0474038	0.0272338	-0.010085
ABCG1_-_43639647.23-P1P2	304	313	356	437	-0.0653239	-0.130583	-0.0979536
ABCG1_-_43639652.23-P1P2	317	253	322	262	-0.0136291	0.0165298	0.00145031
ABCG2_+_89079727.23-P1P2	331	336	254	381	0.0882803	-0.0281461	0.0300671
ABCG2_+_89079755.23-P1P2	141	174	239	143	-0.199709	0.130353	-0.0346782
ABCG2_+_89079974.23-P1P2	296	277	219	449	0.101546	-0.204085	-0.0512694
ABCG2_+_89080025.23-P1P2	194	269	322	384	-0.192074	-0.141515	-0.166794
ABCG2_+_89080044.23-P1P2	78	67	32	54	0.315837	0.139953	0.227895
ABCG2_-_89079568.23-P1P2	213	304	164	316	0.0870599	0.0146786	0.0508693
ABCG2_-_89079599.23-P1P2	248	367	225	271	0.027427	0.183054	0.105241
ABCG2_-_89079947.23-P1P2	241	264	216	339	0.0318569	-0.0893808	-0.0287619
ABCG2_-_89079989.23-P1P2	902	910	780	900	0.0448674	0.039182	0.0420247
ABCG2_-_89080000.23-P1P2	0	3	0	0
ABCG4_+_119019794.23-P1P2	330	411	308	360	0.0171299	0.0989772	0.0580536
ABCG4_+_119019855.23-P1P2	250	292	181	476	0.109423	-0.206871	-0.048724
ABCG4_+_119020113.23-P1P2	19	7	3	6
ABCG4_-_119019755.23-P1P2	249	244	245	222	-0.00205689	0.0802673	0.0391052
ABCG4_-_119019776.23-P1P2	309	337	324	346	-0.025168	0.0207639	-0.00220204
ABCG4_-_119019784.23-P1P2	540	715	496	781	0.0229444	-0.00973299	0.00660573
ABCG4_-_119019798.23-P1P2	13	11	11	14
ABCG4_-_119019811.23-P1P2	62	34	33	52	0.221227	-0.175466	0.0228807
ABCG4_-_119020171.23-P1P2	214	318	251	332	-0.0658958	0.0125274	-0.0266842
ABCG4_-_119020232.23-P1P2	156	288	153	424	-0.000885506	-0.156701	-0.0787932
ABCG5_+_44065447.23-P1P2	359	356	394	341	-0.0417485	0.0549376	0.00659454
ABCG5_+_44065537.23-P1P2	294	340	242	296	0.0627907	0.101979	0.082385
ABCG5_+_44065669.23-P1P2	184	133	172	134	0.0165661	0.0300529	0.0233095
ABCG5_+_44065862.23-P1P2	247	237	241	210	0.000994473	0.0932967	0.0471456
ABCG5_+_44065865.23-P1P2	68	101	55	91	0.069162	0.085078	0.07712
ABCG5_-_44065428.23-P1P2	741	824	737	934	-0.00597504	-0.0279579	-0.0169665
ABCG5_-_44065433.23-P1P2	398	372	216	382	0.214158	0.0206797	0.117419
ABCG5_-_44065438.23-P1P2	167	208	197	199	-0.0679792	0.0555211	-0.00622905
ABCG5_-_44065586.23-P1P2	310	278	251	325	0.0687786	-0.0431717	0.0128034
ABCG5_-_44065840.23-P1P2	144	143	162	213	-0.0507443	-0.162449	-0.106597
ABCG8_+_44066166.23-P1P2	124	233	104	162	0.0559765	0.212695	0.134336
ABCG8_+_44066180.23-P1P2	222	280	141	253	0.157011	0.0836693	0.12034
ABCG8_+_44066240.23-P1P2	207	235	211	252	-0.0148972	-0.000648916	-0.00777308
ABCG8_+_44066323.23-P1P2	542	395	405	452	0.0979449	-0.0326309	0.032657
ABCG8_+_44066333.23-P1P2	350	331	430	324	-0.0827485	0.0442659	-0.0192413
ABCG8_-_44066172.23-P1P2	492	580	512	578	-0.022422	0.035442	0.00651
ABCG8_-_44066199.23-P1P2	68	48	74	28	-0.0386701
ABCG8_-_44066213.23-P1P2	68	81	99	117	-0.144439	-0.147322	-0.145881
ABCG8_-_44066292.23-P1P2	231	433	194	261	0.0554928	0.282996	0.169244
ABCG8_-_44066373.23-P1P2	324	179	234	181	0.110316	0.0282702	0.0692932
ABHD10_+_111697851.23-P1P2	567	576	498	550	0.0392124	0.0564842	0.0478483
ABHD10_+_111697939.23-P1P2	69	108	50	120	0.109103	-0.018137	0.0454829
ABHD10_+_111698093.23-P1P2	716	657	614	722	0.0479071	-0.0127112	0.0175979
ABHD10_+_111698102.23-P1P2	197	208	279	324	-0.134408	-0.184488	-0.159448
ABHD10_+_111698117.23-P1P2	38	43	40	61		-0.138434
ABHD10_+_111698316.23-P1P2	510	675	777	786	-0.160944	-0.0412219	-0.101083
ABHD10_-_111697877.23-P1P2	456	508	409	507	0.0315877	0.0347114	0.0331495
ABHD10_-_111697911.23-P1P2	108	80	95	51	0.0386655	0.255414	0.14704
ABHD10_-_111697914.23-P1P2	359	536	373	501	-0.0218442	0.0669911	0.0225735
ABHD10_-_111697938.23-P1P2	186	181	167	212	0.0312153	-0.0441	-0.00644234
ABHD11_+_73152640.23-P1P2	267	284	279	303	-0.0239182	0.00185488	-0.0110317
ABHD11_+_73152656.23-P1P2	617	680	616	769	-0.00735257	-0.0268216	-0.0170871
ABHD11_+_73152963.23-P1P2	553	669	445	631	0.0710187	0.0625351	0.0667769
ABHD11_+_73153163.23-P1P2	350	253	319	336	0.0257604	-0.10596	-0.0400997
ABHD11_-_73152688.23-P1P2	358	456	320	431	0.0328357	0.0615043	0.04717
ABHD11_-_73153052.23-P1P2	134	175	52	155	0.33605	0.0934977	0.214774
ABHD11_-_73153080.23-P1P2	19	33	21	23
ABHD11_-_73153094.23-P1P2	107	128	79	124	0.102306	0.0493738	0.0758401
ABHD11_-_73153115.23-P1P2	145	173	147	173	-0.0129202	0.0337412	0.0104105
ABHD11_-_73153135.23-P1P2	527	538	540	608	-0.0167976	-0.0264858	-0.0216417
ABHD12B_+_51339177.23-P1P2	453	683	382	576	0.0540072	0.117638	0.0858224
ABHD12B_-_51338832.23-P1P2	112	127	127	145	-0.053617	-0.0315231	-0.0425701
ABHD12B_-_51338864.23-P1P2	387	414	264	363	0.131049	0.098472	0.114761
ABHD12B_-_51338879.23-P1P2	105	187	107	180	-0.0147988	0.0525266	0.0188639
ABHD12B_-_51338885.23-P1P2	919	1090	1053	1103	-0.0574052	0.0279034	-0.0147509
ABHD12B_-_51338895.23-P1P2	291	315	280	426	0.00606108	-0.114894	-0.0544166
ABHD12B_-_51338913.23-P1P2	686	947	631	888	0.0224279	0.0654152	0.0439215
ABHD12B_-_51338916.23-P1P2	466	423	379	628	0.0671542	-0.160835	-0.0468402
ABHD12B_-_51339227.23-P1P2	70	90	49	167	0.121673	-0.270645	-0.0744858
ABHD12B_-_51339232.23-P1P2	454	508	413	341	0.0264536	0.230006	0.12823
ABHD12_+_25371025.23-P1P2	453	509	421	465	0.0186803	0.0782582	0.0484693
ABHD12_+_25371393.23-P1P2	366	482	431	444	-0.0673486	0.0741758	0.00341359
ABHD12_+_25371436.23-P1P2	176	214	221	299	-0.0906803	-0.130946	-0.110813
ABHD12_-_25371009.23-P1P2	161	191	188	233	-0.0642826	-0.0641282	-0.0642054
ABHD12_-_25371014.23-P1P2	551	552	459	441	0.0584454	0.144284	0.101365
ABHD12_-_25371024.23-P1P2	103	127	102	58	-0.00439664	0.419647	0.207625
ABHD12_-_25371053.23-P1P2	221	258	197	255	0.033834	0.0395002	0.0366671
ABHD12_-_25371057.23-P1P2	404	533	385	596	0.00956348	-0.021268	-0.00585224
ABHD12_-_25371074.23-P1P2	399	366	318	508	0.0745169	-0.127687	-0.0265851
ABHD12_-_25371489.23-P1P2	461	377	346	283	0.0963388	0.174957	0.135648
ABHD13_+_108870795.23-P1P2	25	35	42	62		-0.247799
ABHD13_+_108870811.23-P1P2	224	201	306	226	-0.1213	-0.0239814	-0.0726409
ABHD13_+_108871155.23-P1P2	166	195	145	192	0.0412092	0.0413752	0.0412922
ABHD13_+_108871228.23-P1P2	304	416	373	569	-0.0822756	-0.120472	-0.101374
ABHD13_+_108871236.23-P1P2	149	246	132	229	0.0360818	0.0690008	0.0525413
ABHD13_-_108870880.23-P1P2	258	372	229	308	0.0353888	0.126701	0.0810449
ABHD13_-_108870892.23-P1P2	268	290	334	337	-0.0879458	-0.0402164	-0.0640811
ABHD13_-_108870927.23-P1P2	284	212	104	215	0.357123	0.0268223	0.191973
ABHD13_-_108871256.23-P1P2	400	331	403	372	-0.0106573	-0.0237576	-0.0172075
ABHD13_-_108871313.23-P1P2	540	736	606	750	-0.0498459	0.0244631	-0.0126914
ABHD14A_+_52009088.23-P1P2	290	231	237	257	0.0653995	-0.0187761	0.0233117
ABHD14A_+_52009119.23-P1P2	44	56	33	21		0.516689
ABHD14A_+_52009149.23-P1P2	341	345	431	477	-0.0930594	-0.125779	-0.109419
ABHD14A_+_52009194.23-P1P2	207	175	191	232	0.0212918	-0.105088	-0.0418982
ABHD14A_+_52009199.23-P1P2	120	163	115	110	0.00752411	0.227382	0.117453
ABHD14A_+_52009255.23-P1P2	512	539	514	599	-0.00935879	-0.0182284	-0.0137936
ABHD14A_-_52009122.23-P1P2	25	40	39	52		-0.0954437
ABHD14A_-_52009154.23-P1P2	0	79	10	62		0.153053
ABHD14A_-_52009160.23-P1P2	142	263	136	364	0.00774671	-0.126285	-0.059269
ABHD14A_-_52009315.23-P1P2	118	143	106	167	0.0310309	-0.0426523	-0.0058107
ABHD14B_+_52007815.23-P1	1199	1401	1269	1384	-0.0285618	0.0397524	0.00559533
ABHD14B_+_52016945.23-P2	344	447	414	577	-0.0752524	-0.0919573	-0.0836048
ABHD14B_+_52017055.23-P2	97	148	101	172	-0.0226268	-0.0402559	-0.0314414
ABHD14B_+_52017325.23-P2	397	562	324	573	0.0658981	0.0241968	0.0450474
ABHD14B_+_52017350.23-P2	351	364	353	304	-0.0100068	0.122433	0.0562131
ABHD14B_+_52017353.23-P2	447	512	258	286	0.191782	0.320475	0.256128
ABHD14B_-_52007690.23-P1	506	479	379	496	0.0970805	0.016569	0.0568248
ABHD14B_-_52007852.23-P1	646	753	688	933	-0.0308323	-0.0717971	-0.0513147
ABHD14B_-_52007865.23-P1	345	434	415	600	-0.0750743	-0.125736	-0.100405
ABHD14B_-_52007985.23-P1	836	1092	889	1043	-0.0302797	0.0563465	0.0130334
ABHD14B_-_52007995.23-P1	957	949	1126	1090	-0.0670393	-0.0344664	-0.0507528
ABHD14B_-_52008010.23-P1	1312	1160	1187	1401	0.0284428	-0.0592049	-0.0153811
ABHD14B_-_52008027.23-P1	521	667	540	609	-0.0209587	0.0785345	0.0287879
ABHD14B_-_52008030.23-P1	885	964	819	831	0.0202227	0.106842	0.0635322
ABHD14B_-_52008040.23-P1	1383	1497	1427	1540	-0.0193234	0.0197971	0.000236839
ABHD14B_-_52016935.23-P2	501	416	448	476	0.0326907	-0.0325995	4.56e-05
ABHD14B_-_52016965.23-P2	251	342	265	312	-0.0276662	0.0789461	0.0256399
ABHD14B_-_52017160.23-P2	591	566	609	660	-0.0188448	-0.0419121	-0.0303784
ABHD14B_-_52017383.23-P2	438	383	419	476	0.008174	-0.0732954	-0.0325607
ABHD14B_-_52017387.23-P2	350	334	326	427	0.0178723	-0.0872103	-0.034669
ABHD15_+_27893596.23-P1P2	164	234	221	311	-0.116343	-0.106329	-0.111336
ABHD15_+_27893970.23-P1P2	392	342	387	446	-0.00327701	-0.0969917	-0.0501344
ABHD15_-_27893577.23-P1P2	859	929	876	941	-0.0150636	0.0274217	0.00617903
ABHD15_-_27893616.23-P1P2	179	216	131	219	0.105507	0.0269495	0.0662283
ABHD15_-_27893641.23-P1P2	138	148	106	289	0.087928	-0.295772	-0.103922
ABHD15_-_27893654.23-P1P2	314	427	201	305	0.154166	0.199416	0.176791
ABHD15_-_27893937.23-P1P2	294	331	319	357	-0.0375995	-0.00349188	-0.0205457
ABHD15_-_27893964.23-P1P2	298	348	250	452	0.0558827	-0.0950081	-0.0195627
ABHD15_-_27893980.23-P1P2	36	51	51	35	-0.134516	0.219114	0.0422988
ABHD15_-_27894008.23-P1P2	26	152	68	68	-0.357318	0.429804	0.036243
ABHD16A_+_31670831.23-P1P2	126	244	241	328	-0.243612	-0.111929	-0.177771
ABHD16A_+_31671120.23-P1P2	858	1102	899	1069	-0.0249051	0.0487113	0.0119031
ABHD16A_+_31671138.23-P1P2	424	396	554	481	-0.105126	-0.0620051	-0.0835657
ABHD16A_-_31670442.23-P1P2	230	317	333	238	-0.142423	0.174875	0.016226
ABHD16A_-_31670645.23-P1P2	493	473	464	513	0.0140889	-0.00623106	0.00392893
ABHD16A_-_31670650.23-P1P2	29	37	31	54		-0.152414
ABHD16A_-_31670671.23-P1P2	854	735	858	935	-0.00964015	-0.0847647	-0.0472024
ABHD16A_-_31670675.23-P1P2	480	414	500	451	-0.0227767	-0.00840786	-0.0155923
ABHD16A_-_31670679.23-P1P2	285	364	323	432	-0.0534262	-0.0505909	-0.0520085
ABHD16A_-_31670764.23-P1P2	1176	1019	1126	953	0.0078467	0.0667125	0.0372796
ABHD16B_+_62492825.23-P1P2	277	335	236	280	0.0502693	0.122046	0.0861579
ABHD16B_+_62492837.23-P1P2	527	713	434	676	0.0626141	0.0599797	0.0612969
ABHD16B_+_62492887.23-P1P2	603	738	594	707	-0.00247727	0.0548711	0.0261969
ABHD16B_+_62493200.23-P1P2	0	3	0	0
ABHD16B_+_62493236.23-P1P2	369	441	447	535	-0.0776282	-0.0613988	-0.0695135
ABHD16B_+_62493242.23-P1P2	564	466	573	540	-0.0136952	-0.0388286	-0.0262619
ABHD16B_+_62493291.23-P1P2	183	308	241	195	-0.10799	0.258812	0.0754109
ABHD16B_-_62492870.23-P1P2	290	306	163	354	0.201423	-0.0380055	0.081709
ABHD16B_-_62493095.23-P1P2	277	256	144	154	0.229795	0.283985	0.25689
ABHD16B_-_62493298.23-P1P2	69	57	68	50	-0.00263683	0.0982578	0.0478105
ABHD17A_+_1885071.23-P1P2	719	977	716	1280	-0.00642258	-0.0992668	-0.0528447
ABHD17A_+_1885470.23-P1P2	320	357	236	357	0.102709	0.0337412	0.0682251
ABHD17A_-_1885045.23-P1P2	797	839	913	987	-0.0573212	-0.0462517	-0.0517864
ABHD17A_-_1885067.23-P1P2	564	702	504	691	0.0329324	0.0415177	0.0372251
ABHD17A_-_1885076.23-P1P2	429	559	443	606	-0.0196118	-0.00600951	-0.0128107
ABHD17A_-_1885086.23-P1P2	230	211	280	276	-0.0794264	-0.0984859	-0.0889561
ABHD17A_-_1885099.23-P1P2	510	382	378	436	0.100902	-0.0313631	0.0347695
ABHD17A_-_1885105.23-P1P2	312	408	375	365	-0.0747794	0.0885783	0.00689941
ABHD17A_-_1885122.23-P1P2	509	732	541	878	-0.0300989	-0.0558074	-0.0429532
ABHD17A_-_1885483.23-P1P2	585	466	541	483	0.0204731	0.0160984	0.0182858
ABHD17B_+_74525655.23-P1P2	509	562	559	738	-0.0419931	-0.100406	-0.0711994
ABHD17B_+_74525744.23-P1P2	123	66	101	104	0.0636708	-0.190165	-0.0632472
ABHD17B_+_74525862.23-P1P2	964	957	863	1102	0.0322778	-0.0357241	-0.00172319
ABHD17B_+_74526081.23-P1P2	38	34	44	16
ABHD17B_+_74526089.23-P1P2	117	84	87	70	0.0997208	0.123514	0.111617
ABHD17B_+_74526100.23-P1P2	41	60	9	53		0.0948231
ABHD17B_-_74525630.23-P1P2	388	379	488	347	-0.0912731	0.0771754	-0.00704888
ABHD17B_-_74525690.23-P1P2	340	382	475	398	-0.129452	0.0135378	-0.0579569
ABHD17B_-_74525704.23-P1P2	274	207	221	221	0.0701762	0.00151742	0.0358468
ABHD17B_-_74526135.23-P1P2	389	548	318	495	0.0652931	0.0838256	0.0745593
ABHD17C_+_80987662.23-P1P2	362	427	312	269	0.046074	0.26126	0.153667
ABHD17C_+_80987691.23-P1P2	473	480	524	418	-0.0451528	0.101841	0.0283439
ABHD17C_+_80987703.23-P1P2	574	448	704	659	-0.0821296	-0.156286	-0.119208
ABHD17C_+_80987878.23-P1P2	145	154	135	178	0.0180261	-0.0375718	-0.00977282
ABHD17C_+_80987887.23-P1P2	113	175	83	162	0.104184	0.0717484	0.0879661
ABHD17C_+_80988086.23-P1P2	52	62	85	86	-0.186519	-0.127374	-0.156947
ABHD17C_+_80988162.23-P1P2	456	371	460	462	-0.0111158	-0.0742703	-0.0426931
ABHD17C_-_80987718.23-P1P2	435	377	422	513	0.00308377	-0.117929	-0.0574227
ABHD17C_-_80988060.23-P1P2	252	215	202	331	0.0724279	-0.178714	-0.0531432
ABHD17C_-_80988126.23-P1P2	244	320	249	305	-0.0153135	0.0573803	0.0210334
ABHD1_+_27346724.23-P1P2	238	297	269	421	-0.0524369	-0.138053	-0.095245
ABHD1_+_27346727.23-P1P2	658	868	719	896	-0.0401597	0.0181085	-0.0110256
ABHD1_+_27347051.23-P1P2	464	443	339	396	0.106123	0.0889652	0.0975443
ABHD1_+_27347075.23-P1P2	287	370	353	334	-0.0831605	0.0841429	0.000491209
ABHD1_+_27347086.23-P1P2	417	490	446	488	-0.0323743	0.035755	0.00169034
ABHD1_+_27347095.23-P1P2	82	126	49	88	0.179172	0.210481	0.194827
ABHD1_+_27347132.23-P1P2	1011	959	997	1004	-0.00287462	0.0111622	0.00414376
ABHD1_-_27346733.23-P1P2	409	512	412	438	-0.0105978	0.110606	0.0500039
ABHD1_-_27346736.23-P1P2	120	180	156	250	-0.103285	-0.12801	-0.115648
ABHD1_-_27347069.23-P1P2	250	260	312	249	-0.0884503	0.0550265	-0.0167119
ABHD2_+_89631693.23-P1P2	689	868	753	1043	-0.0402206	-0.056693	-0.0484568
ABHD2_+_89632075.23-P1P2	305	240	284	345	0.017982	-0.144949	-0.0634835
ABHD2_+_89632196.23-P1P2	582	504	663	549	-0.0552946	-0.00836886	-0.0318317
ABHD2_-_89631662.23-P1P2	423	443	419	480	-0.00448927	-0.00575633	-0.0051228
ABHD2_-_89631738.23-P1P2	705	768	648	936	0.0226951	-0.0636657	-0.0204853
ABHD2_-_89631760.23-P1P2	132	169	93	180	0.119321	0.00269215	0.0610067
ABHD2_-_89631921.23-P1P2	60	92	56	89	0.0171299	0.0500649	0.0335974
ABHD2_-_89631993.23-P1P2	622	490	393	542	0.158906	-0.0159213	0.0714922
ABHD2_-_89632047.23-P1P2	140	70	157	38	-0.0495888	0.334545	0.142478
ABHD2_-_89632154.23-P1P2	370	297	247	252	0.138913	0.114642	0.126777
ABHD3_+_19284354.23-P1P2	309	391	172	335	0.204954	0.109853	0.157404
ABHD3_+_19284534.23-P1P2	465	604	473	611	-0.0141409	0.0280675	0.00696332
ABHD3_+_19284717.23-P1P2	310	364	274	325	0.0369175	0.0895428	0.0632301
ABHD3_+_19284728.23-P1P2	290	184	163	212	0.201423	-0.0360058	0.0827089
ABHD3_-_19284369.23-P1P2	91	71	52	105	0.195422	-0.15892	0.0182508
ABHD3_-_19284492.23-P1P2	712	770	592	828	0.059131	-0.00201729	0.0285569
ABHD3_-_19284521.23-P1P2	286	351	361	478	-0.0925727	-0.11832	-0.105446
ABHD3_-_19284683.23-P1P2	509	468	415	468	0.066253	0.0337412	0.0499971
ABHD3_-_19284708.23-P1P2	552	627	505	565	0.0243967	0.085009	0.0547028
ABHD3_-_19284770.23-P1P2	10	2	14	27
ABHD4_+_23067144.23-P1P2	141	130	104	89	0.102665	0.220306	0.161486
ABHD4_+_23067433.23-P1P2	510	377	465	349	0.0256264	0.0717403	0.0486833
ABHD4_+_23067458.23-P1P2	299	291	213	287	0.115305	0.0405563	0.0779308
ABHD4_+_23067515.23-P1P2	72	171	55	212	0.0899334	-0.0720841	0.00892465
ABHD4_+_23067613.23-P1P2	176	248	158	293	0.0312647	-0.0483614	-0.00854833
ABHD4_-_23067199.23-P1P2	489	515	345	565	0.118818	-0.0118829	0.0534677
ABHD4_-_23067580.23-P1P2	369	441	546	544	-0.15033	-0.0696131	-0.109972
ABHD4_-_23067583.23-P1P2	527	551	482	531	0.0244937	0.0519461	0.0382199
ABHD4_-_23067625.23-P1P2	279	202	229	205	0.0638256	0.0264823	0.0451539
ABHD4_-_23067680.23-P1P2	254	280	231	323	0.0265506	-0.0366026	-0.00502602
ABHD5_+_43732395.23-P1P2	326	341	281	263	0.0460383	0.161628	0.103833
ABHD5_+_43732435.23-P1P2	480	397	391	541	0.0665834	-0.118644	-0.0260305
ABHD5_+_43732515.23-P1P2	225	302	307	381	-0.120867	-0.080676	-0.100772
ABHD5_+_43732521.23-P1P2	174	205	145	191	0.0583135	0.068571	0.0634422
ABHD5_+_43732806.23-P1P2	375	363	306	417	0.0659519	-0.0345448	0.0157036
ABHD5_+_43732860.23-P1P2	281	186	300	260	-0.0317184	-0.131177	-0.0814475
ABHD5_-_43732422.23-P1P2	1272	1295	1279	1485	-0.00993638	-0.0336687	-0.0218025
ABHD5_-_43732446.23-P1P2	146	104	95	123	0.148221	-0.0488782	0.0496716
ABHD5_-_43732464.23-P1P2	211	144	152	104	0.111245	0.193975	0.15261
ABHD5_-_43732886.23-P1P2	267	153	196	147	0.104397	0.0534393	0.0789182
ABHD6_+_58223718.23-P1P2	515	452	396	454	0.0875421	0.0315673	0.0595547
ABHD6_+_58223924.23-P1P2	100	129	83	157	0.05977	-0.0629802	-0.00160507
ABHD6_+_58223966.23-P1P2	259	235	213	315	0.0631156	-0.110522	-0.0237032
ABHD6_+_58223976.23-P1P2	391	393	381	523	0.00147299	-0.106969	-0.0527481
ABHD6_+_58223988.23-P1P2	90	212	150	183	-0.193576	0.106171	-0.0437021
ABHD6_-_58223553.23-P1P2	255	293	250	270	-0.000745764	0.0739942	0.0366242
ABHD6_-_58223594.23-P1P2	503	459	530	627	-0.026943	-0.119833	-0.0733878
ABHD6_-_58223751.23-P1P2	138	169	217	239	-0.172432	-0.136903	-0.154668
ABHD6_-_58223761.23-P1P2	108	122	98	144	0.0273672	-0.0478928	-0.0102628
ABHD6_-_58223914.23-P1P2	811	835	810	978	-0.00749366	-0.0440944	-0.025794
ABHD8_+_17413753.23-P1P2	91	148	58	205	0.155739	-0.126678	0.0145307
ABHD8_+_17413810.23-P1P2	420	575	413	669	-0.00183433	-0.0408132	-0.0213238
ABHD8_+_17413933.23-P1P2	204	222	120	238	0.184888	-0.000525681	0.0921811
ABHD8_+_17414242.23-P1P2	268	197	178	210	0.140762	0.00227575	0.071519
ABHD8_-_17413788.23-P1P2	390	333	441	500	-0.0526031	-0.166397	-0.1095
ABHD8_-_17413792.23-P1P2	308	377	380	379	-0.0842818	0.0311359	-0.0265729
ABHD8_-_17413858.23-P1P2	346	367	235	384	0.13264	0.0114455	0.0720428
ABHD8_-_17414169.23-P1P2	442	366	435	508	-0.00214077	-0.127687	-0.0649139
ABHD8_-_17414173.23-P1P2	299	346	287	294	0.0069433	0.113931	0.0604371
ABHD8_-_17414201.23-P1P2	205	351	243	260	-0.0697386	0.181509	0.0558851
ABI1_+_27149446.23-P1P2	351	453	398	553	-0.0536089	-0.0644733	-0.0590411
ABI1_+_27149474.23-P1P2	758	757	573	756	0.0937362	0.0343921	0.0640641
ABI1_+_27149511.23-P1P2	199	308	258	294	-0.1023	0.056647	-0.0228267
ABI1_+_27149704.23-P1P2	500	564	498	617	-0.00648551	-0.0104825	-0.008484
ABI1_+_27149800.23-P1P2	488	569	530	661	-0.0379448	-0.0400546	-0.0389997
ABI1_+_27149865.23-P1P2	602	533	574	510	0.00936597	0.0554607	0.0324134
ABI1_-_27149345.23-P1P2	385	472	406	475	-0.0272421	0.0306215	0.0016897
ABI1_-_27149590.23-P1P2	348	390	359	432	-0.019251	-0.0166196	-0.0179353
ABI1_-_27149837.23-P1P2	481	423	465	454	0.00435172	-0.00108293	0.0016344
ABI1_-_27149855.23-P1P2	306	294	328	426	-0.0331723	-0.148865	-0.0910188
ABI2_+_204193030.23-P1P2	451	436	441	651	0.000206283	-0.163641	-0.0817173
ABI2_+_204193039.23-P1P2	50	58	47	14	0.0145435	0.733614	0.374079
ABI2_+_204193043.23-P1P2	173	205	166	223	0.00706775	-0.00769903	-0.000315639
ABI2_+_204193079.23-P1P2	23	47	29	54		-0.0346201
ABI2_+_204193085.23-P1P2	168	113	135	207	0.0715295	-0.264316	-0.0963933
ABI2_+_204193116.23-P1P2	204	162	214	150	-0.0253329	0.0716358	0.0231515
ABI2_+_204193458.23-P1P2	154	78	108	60	0.121	0.162926	0.141963
ABI2_-_204193048.23-P1P2	123	46	90	50	0.105575	-0.00731487	0.0491299
ABI2_-_204193058.23-P1P2	980	900	930	967	0.0110885	-0.00161407	0.00473719
ABI2_-_204193288.23-P1P2	136	339	186	232	-0.121719	0.220485	0.049383
ABI3BP_+_100711811.23-P1P2	336	286	352	201	-0.0248474	0.2074	0.0912762
ABI3BP_+_100712193.23-P1P2	412	394	510	518	-0.0854868	-0.100988	-0.0932374
ABI3BP_+_100712238.23-P1P2	148	129	131	188	0.0363981	-0.151706	-0.0576542
ABI3BP_+_100712278.23-P1P2	125	98	53	76	0.303862	0.158923	0.231393
ABI3BP_+_100712307.23-P1P2	748	680	656	793	0.0397513	-0.0419537	-0.00110123
ABI3BP_-_100712220.23-P1P2	408	399	382	398	0.0159866	0.0349768	0.0254817
ABI3BP_-_100712267.23-P1P2	155	270	233	233	-0.156068	0.106311	-0.0248787
ABI3BP_-_100712283.23-P1P2	280	299	242	230	0.0450604	0.162926	0.103993
ABI3BP_-_100712320.23-P1P2	448	436	400	538	0.0332415	-0.0697667	-0.0182626
ABI3BP_-_100712323.23-P1P2	600	634	492	640	0.0641749	0.0291033	0.0466391
ABI3_+_47287730.23-P1P2	767	839	710	998	0.0201203	-0.051709	-0.0157943
ABI3_+_47287798.23-P1P2	373	575	396	590	-0.0296863	0.021061	-0.00431267
ABI3_+_47288056.23-P1P2	131	119	177	138	-0.117308	-0.0391963	-0.0782521
ABI3_+_47288122.23-P1P2	665	796	621	718	0.0169348	0.0845209	0.0507279
ABI3_+_47288159.23-P1P2	560	597	595	582	-0.029973	0.0462708	0.00814891
ABI3_+_47288453.23-P1P2	328	416	353	397	-0.0346353	0.0567598	0.0110622
ABI3_+_47288474.23-P1P2	949	978	896	1317	0.0129419	-0.112794	-0.0499262
ABI3_+_47288486.23-P1P2	441	414	534	512	-0.0774788	-0.0708708	-0.0741748
ABI3_+_47288524.23-P1P2	276	289	309	338	-0.0489845	-0.0433761	-0.0461803
ABI3_-_47288028.23-P1P2	267	569	237	435	0.035371	0.165964	0.100668
ABL1_+_133589362.23-ENST00000372348.2	357	577	403	427	-0.0519863	0.181978	0.0649961
ABL1_+_133589617.23-ENST00000372348.2	437	654	375	595	0.0476607	0.0802944	0.0639775
ABL1_+_133589629.23-ENST00000372348.2	365	312	373	295	-0.0158209	0.0613286	0.0227538
ABL1_+_133589636.23-ENST00000372348.2	436	731	465	548	-0.0313432	0.175617	0.0721368
ABL1_+_133589652.23-ENST00000372348.2	392	689	487	711	-0.0868005	0.0182649	-0.0342678
ABL1_-_133589216.23-ENST00000372348.2	173	309	230	311	-0.111434	0.0305645	-0.0404346
ABL1_-_133589228.23-ENST00000372348.2	693	750	660	984	0.00978829	-0.0999679	-0.0450898
ABL1_-_133589268.23-ENST00000372348.2	775	819	802	824	-0.0203868	0.0307443	0.00517872
ABL1_-_133589272.23-ENST00000372348.2	493	621	420	657	0.0502943	0.0059937	0.028144
ABL1_-_133589804.23-ENST00000372348.2	507	558	390	675	0.087401	-0.0599866	0.0137072
ABL2_+_179111875.23-P1	705	787	723	792	-0.0171038	0.0306228	0.00675949
ABL2_+_179111908.23-P1	237	324	183	263	0.0860236	0.136448	0.111236
ABL2_+_179112036.23-P1	227	211	223	372	-0.00148142	-0.24546	-0.123471
ABL2_+_179112061.23-P1	348	468	421	516	-0.0771443	-0.0143348	-0.0457395
ABL2_+_179112138.23-P1	154	157	170	82	-0.0438625	0.35356	0.154849
ABL2_+_179112168.23-P1	1328	1436	1296	1419	0.000921812	0.0396051	0.0202634
ABL2_+_179112186.23-P1	1882	2081	2033	1986	-0.0359883	0.0567485	0.0103801
ABL2_+_179198340.23-P2	605	578	561	464	0.0194974	0.141913	0.0807054
ABL2_+_179198398.23-P2	211	396	169	299	0.0727179	0.172088	0.122403
ABL2_+_179198527.23-P2	151	169	176	227	-0.0636163	-0.111538	-0.0875773
ABL2_+_179198561.23-P2	186	130	208	286	-0.0485669	-0.354485	-0.201526
ABL2_+_179198565.23-P2	153	220	201	211	-0.107102	0.0543079	-0.0263969
ABL2_+_179198736.23-P2	389	307	337	293	0.0442045	0.0567234	0.0504639
ABL2_+_179198740.23-P2	669	726	618	672	0.0208739	0.0717986	0.0463363
ABL2_+_179198799.23-P2	603	674	657	702	-0.0391096	0.0136994	-0.0127051
ABL2_-_179112151.23-P1	1094	1205	1021	1188	0.0171537	0.0407372	0.0289454
ABL2_-_179112154.23-P1	19	72	52	41	-0.373814	0.311002	-0.0314063
ABL2_-_179112158.23-P1	430	377	360	538	0.0566272	-0.141358	-0.0423656
ABL2_-_179198654.23-P2	179	188	160	234	0.0328357	-0.0740322	-0.0205982
ABL2_-_179198834.23-P2	235	215	145	203	0.167526	0.06202	0.114773
ABLIM1_+_116417743.23-ENST00000277895.5	323	452	372	542	-0.0592691	-0.0556684	-0.0574687
ABLIM1_+_116417800.23-ENST00000277895.5	114	100	38	122	0.391293	-0.0641705	0.163561
ABLIM1_+_116417821.23-ENST00000277895.5	177	276	184	247	-0.0220368	0.0884023	0.0331828
ABLIM1_+_116417829.23-ENST00000277895.5	573	689	675	708	-0.0674766	0.0203469	-0.0235649
ABLIM1_+_116417833.23-ENST00000277895.5	113	142	167	136	-0.149888	0.0549986	-0.0474447
ABLIM1_+_116418018.23-ENST00000277895.5	799	924	830	1114	-0.0217747	-0.0583354	-0.0400551
ABLIM1_-_116417795.23-ENST00000277895.5	661	579	699	692	-0.0282549	-0.0540434	-0.0411491
ABLIM1_-_116417810.23-ENST00000277895.5	669	697	584	721	0.0414378	0.017072	0.0292549
ABLIM1_-_116417816.23-ENST00000277895.5	230	222	165	240	0.112755	-0.0046461	0.0540545
ABLIM1_-_116417819.23-ENST00000277895.5	59	115	86	129	-0.144874	-0.0228244	-0.0838494
ABLIM2_+_8160016.23-P1P2	483	686	558	847	-0.0603959	-0.0700654	-0.0652307
ABLIM2_+_8160086.23-P1P2	739	805	667	704	0.0293093	0.0997526	0.0645309
ABLIM2_+_8160141.23-P1P2	350	432	383	375	-0.040685	0.103414	0.0313644
ABLIM2_+_8160204.23-P1P2	391	283	426	336	-0.0390969	-0.0507841	-0.0449405
ABLIM2_+_8160328.23-P1P2	454	715	567	688	-0.0887119	0.052695	-0.0180085
ABLIM2_+_8160487.23-P1P2	136	203	173	225	-0.0953892	-0.0169227	-0.056156
ABLIM2_+_8160523.23-P1P2	180	258	306	286	-0.200772	-0.0169906	-0.108881
ABLIM2_-_8160138.23-P1P2	361	349	333	324	0.0213972	0.0703395	0.0458684
ABLIM2_-_8160157.23-P1P2	649	909	755	898	-0.0629189	0.039736	-0.0115914
ABLIM2_-_8160471.23-P1P2	65	74	61	110	0.0151387	-0.161449	-0.073155
ABLIM3_+_148521081.23-P1P2	39	54	36	73		-0.114702
ABLIM3_+_148521102.23-P1P2	403	484	467	450	-0.0615044	0.0696054	0.00405047
ABLIM3_+_148521122.23-P1P2	316	474	338	442	-0.0324001	0.0681578	0.0178788
ABLIM3_+_148521137.23-P1P2	401	319	465	429	-0.0617527	-0.112136	-0.0869445
ABLIM3_+_148521279.23-P1P2	181	160	133	200	0.104039	-0.0761319	0.0139534
ABLIM3_+_148521297.23-P1P2	137	93	151	132	-0.0433004	-0.138694	-0.0909972
ABLIM3_+_148521451.23-P1P2	990	1087	1123	1321	-0.05375	-0.0622583	-0.0580041
ABLIM3_-_148521229.23-P1P2	217	360	195	264	0.0309046	0.186458	0.108681
ABLIM3_-_148521482.23-P1P2	438	301	366	493	0.0573192	-0.209202	-0.0759415
ABLIM3_-_148521503.23-P1P2	115	195	154	339	-0.114062	-0.238549	-0.176306
ABO_+_136130684.23-P2	243	228	334	215	-0.123532	0.0626481	-0.0304419
ABO_+_136150190.23-P1	246	243	218	279	0.0359699	-0.0342823	0.000843777
ABO_+_136150541.23-P1	63	48	94	83	-0.15336	-0.23591	-0.194635
ABO_+_136150587.23-P1	116	160	178	124	-0.163547	0.159247	-0.00215013
ABO_+_136150601.23-P1	887	906	793	1003	0.0327666	-0.0163403	0.00821316
ABO_-_136130683.23-P2	631	640	552	575	0.0406655	0.0864749	0.0635702
ABO_-_136130692.23-P2	1704	1784	1790	1627	-0.0258348	0.0791	0.0266326
ABO_-_136130896.23-P2	197	174	210	293	-0.0311646	-0.22285	-0.127008
ABO_-_136130899.23-P2	553	551	564	698	-0.0150996	-0.0827007	-0.0489002
ABO_-_136130921.23-P2	573	707	633	878	-0.044131	-0.0729178	-0.0585244
ABO_-_136130928.23-P2	290	502	271	531	0.0166827	0.00608777	0.0113852
ABO_-_136130955.23-P2	614	556	539	651	0.0394014	-0.0439287	-0.00226364
ABO_-_136130959.23-P2	350	391	332	479	0.0112448	-0.06621	-0.0274826
ABO_-_136130966.23-P2	459	632	558	643	-0.0789171	0.0252449	-0.0268361
ABO_-_136150162.23-P1	71	109	44	116	0.165941	0.00309385	0.0845174
ABO_-_136150207.23-P1	531	407	526	538	-0.00450397	-0.103657	-0.0540806
ABO_-_136150219.23-P1	825	930	725	1060	0.0390134	-0.0306826	0.00416542
ABO_-_136150446.23-P1	440	424	458	459	-0.0225123	-0.00531339	-0.0139129
ABO_-_136150600.23-P1	719	752	551	822	0.0887682	-0.0100833	0.0393424
ABO_-_136150606.23-P1	1394	1268	1429	1192	-0.0169534	0.0641748	0.0236107
ABRACL_+_139349873.23-P1P2	468	453	540	688	-0.0599448	-0.172026	-0.115985
ABRACL_+_139349876.23-P1P2	528	547	455	591	0.0461314	-0.00435346	0.020889
ABRACL_+_139349879.23-P1P2	577	466	585	412	-0.0129459	0.0943847	0.0407194
ABRACL_+_139349931.23-P1P2	856	784	668	881	0.0821745	-0.0236951	0.0292397
ABRACL_+_139350209.23-P1P2	599	587	619	858	-0.0198774	-0.153159	-0.0865181
ABRACL_+_139350231.23-P1P2	883	809	759	908	0.0470488	-0.0231027	0.011973
ABRACL_-_139350061.23-P1P2	799	724	787	872	-0.00244281	-0.0578419	-0.0301424
ABRACL_-_139350119.23-P1P2	453	565	463	423	-0.0158768	0.176264	0.0801938
ABRACL_-_139350292.23-P1P2	436	482	598	564	-0.122757	-0.0436179	-0.0831877
ABRACL_-_139350417.23-P1P2	225	229	194	319	0.0459291	-0.12947	-0.0417705
ABRA_+_107782019.23-P1P2	116	107	132	131	-0.0548975	-0.0659025	-0.0604
ABRA_+_107782028.23-P1P2	341	263	188	211	0.208441	0.142212	0.175326
ABRA_+_107782269.23-P1P2	191	183	202	147	-0.0282903	0.1416	0.056655
ABRA_+_107782392.23-P1P2	260	291	199	267	0.0892225	0.0761232	0.0826729
ABRA_+_107782399.23-P1P2	187	107	186	114	-0.0059935	0.00253878	-0.00172736
ABRA_+_107782407.23-P1P2	122	126	141	180	-0.06054	-0.141881	-0.101211
ABRA_+_107782422.23-P1P2	564	586	567	578	-0.00986988	0.0405095	0.0153198
ABRA_-_107782347.23-P1P2	93	69	74	166	0.0751072	-0.398516	-0.161705
ABRA_-_107782350.23-P1P2	268	252	182	327	0.132686	-0.094541	0.0190726
ABRA_-_107782371.23-P1P2	316	319	206	274	0.147544	0.108615	0.12808
ABR_+_1082842.23-P1P2	644	717	549	641	0.0500566	0.0889114	0.069484
ABR_+_1082862.23-P1P2	24	67	41	70		0.0121733
ABR_+_1082896.23-P1P2	250	132	202	194	0.0695322	-0.155856	-0.0431617
ABR_+_1083212.23-P1P2	84	54	37	47	0.290009	0.102102	0.196056
ABR_+_1083246.23-P1P2	152	298	186	354	-0.0813	-0.0510496	-0.0661748
ABR_+_1083266.23-P1P2	350	176	203	232	0.190011	-0.102282	0.0438645
ABR_-_1082914.23-P1P2	483	410	436	587	0.0292608	-0.142961	-0.05685
ABR_-_1083030.23-P1P2	303	259	240	216	0.0767641	0.123134	0.099949
ABR_-_1083256.23-P1P2	290	328	254	199	0.0402253	0.279791	0.160008
ABR_-_1083263.23-P1P2	425	603	519	593	-0.0805545	0.0419753	-0.0192896
ABT1_+_26597184.23-P1P2	450	516	442	589	-0.00142348	-0.0314112	-0.0164174
ABT1_+_26597384.23-P1P2	152	217	110	236	0.109581	-0.00758709	0.0509971
ABT1_+_26597401.23-P1P2	70	107	35	129	0.243947	-0.0583272	0.09281
ABT1_+_26597412.23-P1P2	116	80	111	80	0.00806934	0.0337412	0.0209053
ABT1_-_26597183.23-P1P2	47	100	80	51	-0.201226	0.365288	0.0820305
ABT1_-_26597263.23-P1P2	184	164	193	153	-0.0252959	0.0679269	0.0213155
ABT1_-_26597427.23-P1P2	452	530	413	545	0.0248492	0.0199992	0.0224242
ABT1_-_26597485.23-P1P2	75	104	77	53	-0.0175057	0.365659	0.174077
ABT1_-_26597617.23-P1P2	405	452	430	442	-0.029709	0.044757	0.00752403
ABT1_-_26597649.23-P1P2	183	215	217	180	-0.0698693	0.121229	0.0256799
ABTB1_+_127391808.23-P1P2	336	347	403	474	-0.0740172	-0.119826	-0.0969215
ABTB1_+_127391828.23-P1P2	219	208	133	151	0.173293	0.191432	0.182363
ABTB1_+_127391831.23-P1P2	473	458	484	384	-0.0162964	0.120513	0.0521083
ABTB1_+_127391861.23-P1P2	526	468	554	545	-0.0267892	-0.041258	-0.0340236
ABTB1_+_127392211.23-P1P2	218	335	310	388	-0.135887	-0.0385781	-0.0872324
ABTB1_+_127392221.23-P1P2	966	821	874	949	0.0284282	-0.0375987	-0.00458524
ABTB1_-_127391845.23-P1P2	521	621	448	599	0.0469156	0.0515013	0.0492085
ABTB1_-_127392172.23-P1P2	513	522	560	466	-0.0397979	0.0896183	0.0249102
ABTB1_-_127392198.23-P1P2	260	254	222	177	0.0494766	0.211584	0.13053
ABTB1_-_127392210.23-P1P2	50	172	99	143	-0.256179	0.12466	-0.0657592
ABTB2_+_34379321.23-P1P2	550	457	355	500	0.151154	-0.0105366	0.0703089
ABTB2_+_34379353.23-P1P2	210	399	279	338	-0.111185	0.115436	0.0021253
ABTB2_-_34379074.23-P1P2	580	544	494	552	0.0503809	0.0265529	0.0384669
ABTB2_-_34379083.23-P1P2	541	492	564	464	-0.0230721	0.0625922	0.01976
ABTB2_-_34379146.23-P1P2	475	426	441	569	0.0190476	-0.108776	-0.0448642
ABTB2_-_34379166.23-P1P2	676	585	489	637	0.109738	-0.00818945	0.0507742
ABTB2_-_34379310.23-P1P2	755	755	703	648	0.0179905	0.108991	0.0634909
ABTB2_-_34379384.23-P1P2	514	637	519	691	-0.01146	-0.00632447	-0.00889221
ABTB2_-_34379465.23-P1P2	307	426	278	353	0.0281169	0.126296	0.0772064
ABTB2_-_34379521.23-P1P2	389	501	376	461	0.00440999	0.0747118	0.0395609
ACAA1_+_38178110.23-P1P2	406	484	327	491	0.070695	0.0266709	0.048683
ACAA1_+_38178133.23-P1P2	0	2	20	0
ACAA1_+_38178488.23-P1P2	501	642	553	434	-0.0438284	0.226532	0.091352
ACAA1_+_38178517.23-P1P2	437	508	410	474	0.0152341	0.0678509	0.0415425
ACAA1_+_38178570.23-P1P2	224	245	196	271	0.0405832	-0.0159213	0.0123309
ACAA1_-_38178165.23-P1P2	290	290	252	278	0.0430981	0.0545494	0.0488237
ACAA1_-_38178168.23-P1P2	209	273	203	259	0.00264317	0.0596623	0.0311527
ACAA1_-_38178171.23-P1P2	428	361	339	366	0.0767747	0.0269682	0.0518715
ACAA1_-_38178499.23-P1P2	468	411	499	433	-0.0312497	0.00806588	-0.0115919
ACAA1_-_38178575.23-P1P2	255	187	208	257	0.0660917	-0.122822	-0.0283652
ACAA2_+_47339402.23-P1P2	174	315	169	236	0.00265346	0.175914	0.0892835
ACAA2_+_47339407.23-P1P2	491	469	513	362	-0.0238704	0.161249	0.0686893
ACAA2_+_47339850.23-P1P2	555	532	507	642	0.02493	-0.0588005	-0.0169352
ACAA2_-_47339441.23-P1P2	177	179	147	177	0.0595474	0.0392737	0.0494106
ACAA2_-_47339449.23-P1P2	419	381	408	324	0.00172576	0.113535	0.0576306
ACAA2_-_47339655.23-P1P2	337	305	325	382	0.00523401	-0.0770996	-0.0359328
ACAA2_-_47339855.23-P1P2	559	652	592	734	-0.0287856	-0.0245892	-0.0266874
ACAA2_-_47339858.23-P1P2	222	215	188	274	0.0524678	-0.0856579	-0.016595
ACAA2_-_47339876.23-P1P2	264	379	268	440	-0.0134068	-0.039742	-0.0265744
ACAA2_-_47339894.23-P1P2	174	193	135	202	0.0842816	0.0112994	0.0477905
ACACA_+_35715534.23-P1P2	416	417	539	526	-0.102073	-0.0805986	-0.091336
ACACA_+_35715655.23-P1P2	488	524	319	509	0.146548	0.0480419	0.0972949
ACACA_+_35715673.23-P1P2	190	212	191	158	-0.00984964	0.178499	0.0843246
ACACA_+_35715687.23-P1P2	393	335	538	467	-0.122067	-0.129829	-0.125948
ACACA_-_35715615.23-P1P2	1046	1275	845	1301	0.0696045	0.0238013	0.0467029
ACACA_-_35715847.23-P1P2	91	104	34	126	0.349824	-0.0607435	0.14454
ACACA_-_35715962.23-P1P2	234	195	130	222	0.205659	-0.0301105	0.0877743
ACACA_-_35715992.23-P1P2	534	607	317	426	0.181569	0.20809	0.194829
ACACA_-_35716002.23-P1P2	163	163	92	177	0.199908	-0.00683131	0.0965385
ACACA_-_35716041.23-P1P2	221	233	100	137	0.280231	0.295227	0.287729
ACACB_+_109569160.23-P1	547	400	336	412	0.169156	0.0191868	0.0941715
ACACB_+_109569170.23-P1	349	396	364	546	-0.0232346	-0.124416	-0.0738253
ACACB_+_109569423.23-P1	1231	1191	1221	1543	-0.0049779	-0.0937553	-0.0493666
ACACB_+_109569572.23-P1	245	292	195	320	0.075007	-0.0113454	0.0318308
ACACB_+_109592523.23-P2	877	946	795	988	0.027731	0.0123518	0.0200414
ACACB_+_109592546.23-P2	268	263	166	294	0.166126	-0.0211234	0.0725012
ACACB_+_109592574.23-P2	369	391	332	401	0.0304553	0.0213065	0.0258809
ACACB_+_109592577.23-P2	767	612	763	708	-0.00604189	-0.0380055	-0.0220237
ACACB_+_109592655.23-P2	164	181	120	319	0.105575	-0.245292	-0.0698586
ACACB_+_109592908.23-P2	857	930	842	1039	-0.00152516	-0.0208298	-0.0111775
ACACB_-_109569178.23-P1	1132	1058	1013	1399	0.0324206	-0.103821	-0.0357
ACACB_-_109569213.23-P1	350	267	282	250	0.0705617	0.0661342	0.068348
ACACB_-_109569231.23-P1	1077	1196	1070	1050	-0.00557239	0.0978463	0.046137
ACACB_-_109569253.23-P1	252	351	334	379	-0.110316	-0.00404954	-0.0571827
ACACB_-_109569626.23-P1	800	643	678	939	0.0521876	-0.152712	-0.0502619
ACACB_-_109569639.23-P1	416	496	338	408	0.067514	0.129909	0.0987114
ACACB_-_109592496.23-P2	179	342	221	397	-0.0845382	-0.0396864	-0.0621123
ACACB_-_109592519.23-P2	533	685	552	610	-0.0206707	0.0908384	0.0350838
ACACB_-_109592529.23-P2	155	188	192	109	-0.085735	0.302139	0.108202
ACACB_-_109592941.23-P2	221	354	189	276	0.0488993	0.156294	0.102597
ACAD10_+_112123853.23-P1P2	672	754	603	825	0.0314291	-0.0105693	0.0104299
ACAD10_+_112123992.23-P1P2	135	206	230	220	-0.201563	0.00136603	-0.100098
ACAD10_+_112124115.23-P1P2	604	609	631	626	-0.0238341	0.0201847	-0.00182468
ACAD10_-_112123838.23-P1P2	210	319	218	292	-0.0215286	0.0772866	0.027879
ACAD10_-_112123885.23-P1P2	290	250	175	370	0.175609	-0.159295	0.00815685
ACAD10_-_112123894.23-P1P2	311	424	346	399	-0.0466971	0.0636646	0.00848376
ACAD10_-_112123907.23-P1P2	511	455	491	634	0.00656686	-0.129609	-0.0615211
ACAD10_-_112123925.23-P1P2	361	316	399	368	-0.0443123	-0.0412695	-0.0427909
ACAD10_-_112124129.23-P1P2	50	45	68	90	-0.119682	-0.307556	-0.213619
ACAD10_-_112124210.23-P1P2	581	379	457	345	0.0792983	0.0800215	0.0796599
ACAD11_+_132378245.23-P1P2	253	108	176	92	0.123938	0.112692	0.118315
ACAD11_+_132378251.23-P1P2	104	59	46	49	0.288501	0.125186	0.206843
ACAD11_+_132378312.23-P1P2	658	580	534	538	0.067939	0.0707537	0.0693464
ACAD11_+_132378627.23-P1P2	385	518	268	395	0.123702	0.167222	0.145462
ACAD11_+_132379379.23-P1P2	127	77	92	138	0.109217	-0.253541	-0.072162
ACAD11_-_132378357.23-P1P2	344	266	228	227	0.141523	0.111807	0.126665
ACAD11_-_132378588.23-P1P2	84	163	207	138	-0.335693	0.115722	-0.109985
ACAD11_-_132378623.23-P1P2	90	124	95	151	-0.02759	-0.0632583	-0.0454241
ACAD11_-_132378633.23-P1P2	321	307	316	302	-0.00223705	0.0418265	0.0197947
ACAD11_-_132379444.23-P1P2	120	105	110	71	0.0236778	0.226403	0.12504
ACAD8_+_134123511.23-P1P2	382	416	438	542	-0.0576544	-0.096535	-0.0770947
ACAD8_+_134123936.23-P1P2	256	202	164	176	0.153884	0.101584	0.127734
ACAD8_-_134123445.23-P1P2	286	177	254	154	0.035178	0.10228	0.0687291
ACAD8_-_134123448.23-P1P2	542	511	472	553	0.0423114	-0.00515172	0.0185798
ACAD8_-_134123455.23-P1P2	214	249	230	374	-0.0341443	-0.166563	-0.100354
ACAD8_-_134123480.23-P1P2	300	322	356	346	-0.0701372	-0.00165519	-0.0358962
ACAD8_-_134123488.23-P1P2	154	119	176	175	-0.0564672	-0.156154	-0.106311
ACAD8_-_134123502.23-P1P2	505	515	595	581	-0.0675406	-0.0256328	-0.0465867
ACAD8_-_134123507.23-P1P2	402	462	363	434	0.0291426	0.0645254	0.046834
ACAD8_-_134123648.23-P1P2	604	588	627	464	-0.0215231	0.150359	0.0644181
ACAD9_+_128598584.23-P1P2	53	95	50	38	0.0132329	0.484911	0.249072
ACAD9_+_128598604.23-P1P2	357	399	242	339	0.133347	0.113981	0.123664
ACAD9_+_128598694.23-P1P2	23	21	19	14
ACAD9_+_128598781.23-P1P2	39	34	8	19
ACAD9_-_128598499.23-P1P2	14	18	5	8
ACAD9_-_128598508.23-P1P2	18	112	11	49		0.440787
ACAD9_-_128598528.23-P1P2	52	147	44	78	0.0527653	0.345779	0.199272
ACAD9_-_128598541.23-P1P2	42	225	30	145		0.25008
ACAD9_-_128598801.23-P1P2	71	86	45	60	0.157774	0.211002	0.184388
ACAD9_-_128598823.23-P1P2	54	96	31	60	0.193743	0.265165	0.229454
ACADL_+_211089708.23-P1P2	325	350	224	348	0.127308	0.0365629	0.0819352
ACADL_+_211089722.23-P1P2	89	95	94	146	-0.0278049	-0.177852	-0.102829
ACADL_+_211090089.23-P1P2	1100	1233	1106	1318	-0.00991882	0.000916069	-0.00450137
ACADL_-_211089616.23-P1P2	322	308	244	411	0.0928589	-0.108309	-0.00772524
ACADL_-_211089695.23-P1P2	172	197	147	138	0.0491342	0.209006	0.12907
ACADL_-_211090002.23-P1P2	744	493	552	621	0.10053	-0.0799126	0.0103087
ACADL_-_211090030.23-P1P2	392	377	239	273	0.171867	0.192671	0.182269
ACADL_-_211090048.23-P1P2	562	640	519	679	0.0209838	0.00461501	0.0127994
ACADL_-_211090061.23-P1P2	451	358	414	435	0.0231654	-0.0621823	-0.0195084
ACADL_-_211090095.23-P1P2	282	212	214	254	0.0923311	-0.0552569	0.0185371
ACADM_+_76190107.23-P1P2	622	770	761	876	-0.0812372	-0.0297648	-0.055501
ACADM_+_76190432.23-P1P2	387	468	450	468	-0.0627509	0.0337412	-0.0145049
ACADM_+_76190695.23-P1P2	454	432	389	421	0.0482096	0.0464412	0.0473254
ACADM_+_76190716.23-P1P2	618	646	618	780	-0.00794202	-0.0590711	-0.0335066
ACADM_+_76190816.23-P1P2	586	652	497	828	0.0519206	-0.0839239	-0.0160016
ACADM_-_76190463.23-P1P2	644	903	559	765	0.0434969	0.115402	0.0794494
ACADM_-_76190475.23-P1P2	260	247	246	241	0.0121722	0.0458497	0.0290109
ACADM_-_76190620.23-P1P2	540	617	498	670	0.0214821	-0.00683582	0.00732313
ACADM_-_76190633.23-P1P2	592	754	677	853	-0.0566974	-0.0270033	-0.0418503
ACADM_-_76190671.23-P1P2	296	209	260	282	0.0391828	-0.113765	-0.037291
ACADSB_+_124768533.23-P1P2	1043	1210	1043	1061	-0.00794202	0.0984451	0.0452515
ACADSB_+_124768710.23-P1P2	162	91	77	114	0.262351	-0.0772129	0.0925691
ACADSB_+_124768874.23-P1P2	757	910	843	813	-0.0470451	0.0892399	0.0210974
ACADSB_+_124768891.23-P1P2	514	515	399	730	0.0840931	-0.138042	-0.0269743
ACADSB_+_124768894.23-P1P2	197	213	254	238	-0.100293	-0.0209032	-0.0605981
ACADSB_+_124768941.23-P1P2	350	401	423	440	-0.076784	-0.0119589	-0.0443715
ACADSB_+_124768944.23-P1P2	1593	1691	1430	1766	0.031285	0.012373	0.021829
ACADSB_+_124768952.23-P1P2	228	356	198	302	0.0433258	0.114741	0.0790333
ACADSB_-_124768497.23-P1P2	157	241	221	198	-0.132194	0.13051	-0.000842173
ACADSB_-_124768552.23-P1P2	1059	1213	968	1216	0.0247088	0.0325249	0.0286168
ACADS_+_121163619.23-P1P2	342	351	335	350	-0.000426853	0.035146	0.0173596
ACADS_+_121163685.23-P1P2	681	605	577	588	0.0522805	0.047775	0.0500277
ACADS_+_121163695.23-P1P2	630	740	660	683	-0.0248474	0.0732087	0.0241806
ACADS_+_121163865.23-P1P2	430	442	483	654	-0.0501804	-0.159175	-0.104678
ACADS_+_121164027.23-P1P2	284	387	235	364	0.0608817	0.0639102	0.0623959
ACADS_+_121164090.23-P1P2	95	154	38	110	0.325037	0.199416	0.262227
ACADS_-_121163653.23-P1P2	230	174	198	230	0.0464996	-0.103647	-0.0285735
ACADS_-_121163657.23-P1P2	448	502	394	481	0.0387338	0.0547823	0.0467581
ACADS_-_121163671.23-P1P2	659	626	859	938	-0.104259	-0.16538	-0.13482
ACADS_-_121163758.23-P1P2	865	892	700	1024	0.0689711	-0.0342111	0.01738
ACADVL_+_7123231.23-P1P2	628	784	812	1019	-0.101321	-0.095347	-0.0983341
ACADVL_+_7123718.23-P1P2	308	264	296	354	0.00649958	-0.1107	-0.0521
ACADVL_-_7123221.23-P1P2	301	212	209	221	0.124617	0.0132695	0.0689434
ACADVL_-_7123242.23-P1P2	792	851	992	1106	-0.0897656	-0.0953101	-0.0925379
ACADVL_-_7123283.23-P1P2	693	866	887	824	-0.0976344	0.0582199	-0.0197072
ACADVL_-_7123300.23-P1P2	468	422	588	377	-0.090891	0.0892628	-0.000814103
ACADVL_-_7123392.23-P1P2	485	629	523	585	-0.0353542	0.0694488	0.0170473
ACADVL_-_7123639.23-P1P2	358	623	362	672	-0.0119798	-0.00353837	-0.0077591
ACADVL_-_7123665.23-P1P2	200	147	174	189	0.0426657	-0.0900029	-0.0236686
ACADVL_-_7123677.23-P1P2	401	399	390	462	0.00216581	-0.0384445	-0.0181394
ACAN_+_89346671.23-P1P2	298	394	369	414	-0.0856016	0.00936058	-0.0381205
ACAN_+_89347050.23-P1P2	455	511	339	353	0.0990054	0.215876	0.157441
ACAN_+_89347054.23-P1P2	947	727	883	997	0.0174864	-0.121767	-0.0521401
ACAN_+_89347058.23-P1P2	20	45	20	26
ACAN_+_89347139.23-P1P2	134	143	77	98	0.193394	0.219803	0.206598
ACAN_+_89347148.23-P1P2	49	50	27	123		-0.409487
ACAN_+_89347151.23-P1P2	30	43	36	46
ACAN_-_89346701.23-P1P2	87	63	128	67	-0.148259	0.00343085	-0.0724138
ACAN_-_89346738.23-P1P2	61	85	172	126	-0.384649	-0.160078	-0.272363
ACAN_-_89347101.23-P1P2	476	572	408	551	0.0480762	0.0521585	0.0501174
ACAP1_+_7239854.23-P1P2	261	290	166	302	0.156508	0.0137768	0.0851424
ACAP1_+_7239897.23-P1P2	155	106	117	97	0.0942644	0.0774298	0.0858471
ACAP1_+_7239925.23-P1P2	445	510	340	492	0.0898591	0.0514336	0.0706464
ACAP1_+_7239956.23-P1P2	153	88	132	189	0.0457088	-0.342645	-0.148468
ACAP1_+_7240302.23-P1P2	255	243	170	198	0.139404	0.134579	0.136992
ACAP1_+_7240320.23-P1P2	358	298	275	355	0.0879088	-0.0524386	0.0177351
ACAP1_-_7239866.23-P1P2	266	278	275	372	-0.0200341	-0.109678	-0.064856
ACAP1_-_7240198.23-P1P2	152	180	146	139	0.00669348	0.161015	0.0838542
ACAP1_-_7240242.23-P1P2	736	654	586	660	0.0748804	0.0292445	0.0520624
ACAP1_-_7240264.23-P1P2	281	264	189	293	0.136185	-0.0175772	0.0593039
ACAP2_+_195163325.23-P1P2	82	61	133	123	-0.183693	-0.311575	-0.247634
ACAP2_+_195163701.23-P1P2	95	245	109	209	-0.0578989	0.111993	0.0270472
ACAP2_+_195163707.23-P1P2	575	669	623	620	-0.0370781	0.0711944	0.0170582
ACAP2_-_195163292.23-P1P2	470	491	453	770	0.00544581	-0.187807	-0.0911805
ACAP2_-_195163352.23-P1P2	718	600	469	475	0.146818	0.14877	0.147794
ACAP2_-_195163362.23-P1P2	66	149	87	132	-0.108332	0.0933911	-0.00747058
ACAP2_-_195163382.23-P1P2	787	995	863	1036	-0.0414425	0.0138587	-0.0137919
ACAP2_-_195163395.23-P1P2	68	109	109	157	-0.179408	-0.14593	-0.162669
ACAP2_-_195163655.23-P1P2	325	331	310	436	0.00922964	-0.101923	-0.0463468
ACAP2_-_195163749.23-P1P2	606	751	508	454	0.0561611	0.281564	0.168862
ACAP3_+_1242907.23-P1P2	90	160	104	119	-0.0604827	0.179513	0.0595149
ACAP3_+_1243258.23-P1P2	422	360	303	461	0.112442	-0.0880233	0.0122094
ACAP3_+_1243301.23-P1P2	154	151	190	263	-0.0842818	-0.239472	-0.161877
ACAP3_+_1243337.23-P1P2	338	375	336	362	-0.00578535	0.0511135	0.0226641
ACAP3_-_1242824.23-P1P2	292	365	226	337	0.0851677	0.0730408	0.0791042
ACAP3_-_1242913.23-P1P2	175	150	159	122	0.0269013	0.135475	0.0811884
ACAP3_-_1243095.23-P1P2	127	276	222	349	-0.210897	-0.0818079	-0.146352
ACAP3_-_1243221.23-P1P2	48	86	16	77		0.0881706
ACAP3_-_1243228.23-P1P2	90	82	115	67	-0.0970193	0.133217	0.0180986
ACAP3_-_1243235.23-P1P2	14	5	8	9
ACAT1_+_107992288.23-P1P2	55	82	85	69	-0.166136	0.118734	-0.0237014
ACAT1_+_107992310.23-P1P2	520	380	426	553	0.064516	-0.150996	-0.04324
ACAT1_+_107992321.23-P1P2	672	642	658	572	-0.000291231	0.090587	0.0451479
ACAT1_+_107992690.23-P1P2	1142	1426	1145	1261	-0.00889541	0.0942892	0.0426969
ACAT1_+_107992693.23-P1P2	580	537	515	442	0.035252	0.129603	0.0824276
ACAT1_-_107992307.23-P1P2	816	881	880	955	-0.0353814	-0.00597169	-0.0206766
ACAT1_-_107992336.23-P1P2	704	751	710	943	-0.0110261	-0.078356	-0.044691
ACAT1_-_107992364.23-P1P2	683	821	730	886	-0.0321261	-0.00377571	-0.0179509
ACAT1_-_107992702.23-P1P2	223	98	122	122	0.211242	-0.074118	0.0685622
ACAT1_-_107992733.23-P1P2	718	685	653	911	0.0265418	-0.10665	-0.0400542
ACAT2_+_160183137.23-P1P2	119	93	123	151	-0.0199563	-0.204909	-0.112433
ACAT2_+_160183421.23-P1P2	140	171	132	191	0.0134406	-0.0207217	-0.00364058
ACAT2_+_160183436.23-P1P2	5	20	82	26	-1.02447
ACAT2_+_160183505.23-P1P2	156	145	151	146	0.00389613	0.0303571	0.0171266
ACAT2_-_160183042.23-P1P2	38	51	88	101	-0.313107	-0.302705	-0.307906
ACAT2_-_160183054.23-P1P2	86	130	107	140	-0.0873381	-0.00274865	-0.0450434
ACAT2_-_160183095.23-P1P2	69	72	100	145	-0.142786	-0.310963	-0.226875
ACAT2_-_160183174.23-P1P2	284	456	419	463	-0.149267	0.02624	-0.0615134
ACAT2_-_160183545.23-P1P2	320	289	381	395	-0.0713473	-0.12011	-0.0957285
ACAT2_-_160183588.23-P1P2	858	707	874	723	-0.0146563	0.0227223	0.00403299
ACBD3_+_226374329.23-P1P2	258	246	195	187	0.0937952	0.168765	0.13128
ACBD3_+_226374366.23-P1P2	443	525	487	484	-0.0423539	0.0737788	0.0157125
ACBD3_-_226373901.23-P1P2	294	397	296	410	-0.0104058	0.017876	0.00373513
ACBD3_-_226373955.23-P1P2	153	147	185	118	-0.076958	0.141942	0.0324921
ACBD3_-_226373992.23-P1P2	549	628	417	701	0.0919972	-0.0204055	0.0357958
ACBD3_-_226373998.23-P1P2	31	26	59	51	-0.241808	-0.297995	-0.269901
ACBD3_-_226374023.23-P1P2	105	211	201	185	-0.243913	0.0984913	-0.072711
ACBD3_-_226374064.23-P1P2	217	328	174	326	0.0723118	0.0367527	0.0545323
ACBD3_-_226374403.23-P1P2	403	409	443	218	-0.0423317	0.343561	0.150615
ACBD3_-_226374411.23-P1P2	294	365	345	382	-0.0660731	0.0113261	-0.0273735
ACBD4_+_43210021.23-P2	604	570	408	535	0.134622	0.0649436	0.0997828
ACBD4_+_43210042.23-P2	767	590	578	740	0.0948683	-0.0777982	0.00853507
ACBD4_+_43210060.23-P2	59	31	47	64	0.0746913	-0.323188	-0.124249
ACBD4_+_43210408.23-P2	161	207	163	167	-0.0124285	0.139469	0.0635203
ACBD4_+_43210421.23-P2	208	376	247	422	-0.0703923	-0.0230883	-0.0467403
ACBD4_+_43213044.23-P1	297	272	239	273	0.0710132	0.0319342	0.0514737
ACBD4_+_43213087.23-P1	356	234	281	230	0.0780295	0.0422308	0.0601302
ACBD4_+_43213412.23-P1	208	250	212	340	-0.0148641	-0.11766	-0.0662623
ACBD4_-_43210055.23-P2	569	731	617	696	-0.0373732	0.0578996	0.0102632
ACBD4_-_43210342.23-P2	172	128	118	175	0.12899	-0.120256	0.0043673
ACBD4_-_43210377.23-P2	316	265	297	334	0.0145924	-0.0802028	-0.0328052
ACBD4_-_43210416.23-P2	343	386	325	408	0.0116471	0.00644824	0.00904767
ACBD4_-_43210458.23-P2	435	410	427	390	-0.0011966	0.0583657	0.0285845
ACBD4_-_43213050.23-P1	129	193	142	205	-0.0428337	0.00404047	-0.0193966
ACBD4_-_43213072.23-P1	362	416	503	505	-0.127481	-0.0617195	-0.0946001
ACBD4_-_43213075.23-P1	395	523	571	681	-0.141856	-0.0962397	-0.119048
ACBD4_-_43213105.23-P1	165	337	220	234	-0.112485	0.213345	0.0504299
ACBD4_-_43213242.23-P1	98	72	84	107	0.0480762	-0.161324	-0.0566241
ACBD4_-_43213460.23-P1	157	207	181	151	-0.059636	0.189059	0.0647117
ACBD4_-_43213499.23-P1	239	278	298	405	-0.0881188	-0.151527	-0.119823
ACBD5_+_27529127.23-P1P2	106	177	94	188	0.0357183	0.00405404	0.0198862
ACBD5_+_27529290.23-P1P2	248	361	273	271	-0.042844	0.174938	0.0660469
ACBD5_+_27529332.23-P1P2	170	132	127	184	0.0980293	-0.129797	-0.015884
ACBD5_+_27529682.23-P1P2	441	672	410	692	0.0185453	0.0193006	0.018923
ACBD5_+_27529701.23-P1P2	308	397	406	441	-0.108332	-0.018013	-0.0631726
ACBD5_+_27529710.23-P1P2	860	1092	1009	1210	-0.0660069	-0.0167824	-0.0413947
ACBD5_+_27529713.23-P1P2	24	53	32	33		0.267027
ACBD5_-_27529363.23-P1P2	4	9	7	6
ACBD5_-_27529679.23-P1P2	393	498	343	413	0.041509	0.125893	0.0837009
ACBD5_-_27529780.23-P1P2	201	221	201	230	-0.00794202	0.0140867	0.00307236
ACBD6_+_180471319.23-P1P2	327	315	498	523	-0.160802	-0.215904	-0.188353
ACBD6_+_180471324.23-P1P2	201	165	261	141	-0.102868	0.111137	0.00413492
ACBD6_+_180471354.23-P1P2	429	441	390	430	0.0266936	0.0461787	0.0364362
ACBD6_+_180471478.23-P1P2	61	24	32	36	0.226501
ACBD6_+_180471539.23-P1P2	322	409	344	330	-0.0319591	0.139419	0.0537297
ACBD6_+_180471617.23-P1P2	986	864	885	1053	0.0313301	-0.0636657	-0.0161678
ACBD6_-_180471311.23-P1P2	0	2	10	17
ACBD6_-_180471491.23-P1P2	485	569	499	453	-0.0182834	0.146	0.0638582
ACBD6_-_180471532.23-P1P2	86	97	134	182	-0.169107	-0.276116	-0.222611
ACBD6_-_180471707.23-P1P2	702	798	616	822	0.0395493	0.0191509	0.0293501
ACBD7_+_15130458.23-P1P2	492	639	605	628	-0.0830747	0.0422911	-0.0203918
ACBD7_+_15130520.23-P1P2	308	325	307	350	-0.00676024	-0.00274865	-0.00475445
ACBD7_+_15130765.23-P1P2	223	256	269	169	-0.0760938	0.238219	0.0810627
ACBD7_+_15130776.23-P1P2	561	626	421	673	0.0963856	-0.00190519	0.0472402
ACBD7_-_15130379.23-P1P2	344	240	321	285	0.0172054	-0.0508757	-0.0168352
ACBD7_-_15130397.23-P1P2	36	88	126	121	-0.463195	-0.123061	-0.293128
ACBD7_-_15130438.23-P1P2	40	77	58	68	-0.142968	0.0949438	-0.0240121
ACBD7_-_15130555.23-P1P2	345	386	327	335	0.0115305	0.103516	0.0575231
ACBD7_-_15130579.23-P1P2	272	160	182	129	0.13807	0.139782	0.138926
ACBD7_-_15130633.23-P1P2	105	32	75	57	0.114332	-0.250522	-0.0680949
ACCSL_+_44069556.23-ENST00000378832.1	548	588	671	597	-0.0815281	0.0262617	-0.0276332
ACCSL_+_44069616.23-ENST00000378832.1	714	779	770	959	-0.0353814	-0.0686163	-0.0519989
ACCSL_+_44069971.23-ENST00000378832.1	1530	1627	1560	1741	-0.0149985	0.000395802	-0.00730137
ACCSL_+_44069981.23-ENST00000378832.1	238	210	238	221	-0.00794202	0.00860226	0.000330116
ACCSL_+_44069992.23-ENST00000378832.1	361	247	381	233	-0.027537	0.0624719	0.0174674
ACCSL_-_44069582.23-ENST00000378832.1	455	566	392	560	0.0462174	0.0389887	0.042603
ACCSL_-_44069740.23-ENST00000378832.1	504	585	415	560	0.0626656	0.0552462	0.0589559
ACCSL_-_44069759.23-ENST00000378832.1	428	405	404	355	0.0130291	0.0986227	0.0558259
ACCSL_-_44069772.23-ENST00000378832.1	1006	1067	859	880	0.0494636	0.128617	0.0890401
ACCSL_-_44069930.23-ENST00000378832.1	49	73	53	73	-0.0364586	0.0337412	-0.00135869
ACCS_+_44087946.23-P1P2	476	528	499	526	-0.0250902	0.0356098	0.00525981
ACCS_+_44088025.23-P1P2	524	528	633	551	-0.0766168	0.0127465	-0.0319351
ACCS_+_44088028.23-P1P2	506	555	506	534	-0.00794202	0.0527337	0.0223958
ACCS_+_44088070.23-P1P2	273	276	286	264	-0.0248474	0.0556287	0.0153907
ACCS_+_44088091.23-P1P2	443	411	391	436	0.0374328	0.00466618	0.0210495
ACCS_+_44088215.23-P1P2	456	489	463	416	-0.0134781	0.113349	0.0499354
ACCS_+_44088290.23-P1P2	91	132	88	174	0.0042401	-0.102282	-0.0490212
ACCS_-_44088081.23-P1P2	101	110	132	76	-0.105217	0.2158	0.0552914
ACCS_-_44088090.23-P1P2	400	673	468	731	-0.0649971	-0.00696357	-0.0359803
ACCS_-_44088106.23-P1P2	151	135	139	215	0.0221496	-0.195398	-0.0866241
ACD_+_67693727.23-P1P2	271	286	236	348	0.0423114	-0.0628705	-0.0102796
ACD_+_67693748.23-P1P2	201	314	236	203	-0.0662774	0.248514	0.0911184
ACD_+_67694105.23-P1P2	279	255	216	315	0.085064	-0.0703048	0.00737961
ACD_+_67694124.23-P1P2	789	828	664	872	0.0547386	0.0082472	0.0314929
ACD_-_67693904.23-P1P2	208	151	192	136	0.0211454	0.0852572	0.0532013
ACD_-_67693954.23-P1P2	281	292	272	293	0.00388757	0.0320578	0.0179727
ACD_-_67693957.23-P1P2	312	347	397	406	-0.0954969	-0.0435776	-0.0695373
ACD_-_67694092.23-P1P2	179	209	245	151	-0.122003	0.193794	0.0358954
ACD_-_67694143.23-P1P2	130	222	136	323	-0.0243388	-0.150892	-0.0876153
ACD_-_67694152.23-P1P2	96	132	114	56	-0.0703923	0.455939	0.192773
ACE2_+_15618824.23-P1P2	302	386	246	339	0.0665895	0.0976714	0.0821305
ACE2_+_15618847.23-P1P2	841	719	812	808	0.00481014	-0.0237208	-0.00945532
ACE2_+_15619016.23-P1P2	48	29	42	34
ACE2_+_15619047.23-P1P2	267	214	330	234	-0.084926	-0.0102512	-0.0475886
ACE2_+_15619087.23-P1P2	751	665	661	819	0.0384465	-0.0688217	-0.0151876
ACE2_-_15618591.23-P1P2	279	368	340	502	-0.0797984	-0.119154	-0.099476
ACE2_-_15618594.23-P1P2	817	989	815	1173	-0.00705134	-0.0502727	-0.028662
ACE2_-_15618975.23-P1P2	1338	1641	1213	1700	0.0276999	0.0163489	0.0220244
ACE2_-_15618978.23-P1P2	1812	2168	1646	2016	0.0269745	0.0695327	0.0482536
ACE2_-_15619013.23-P1P2	873	1137	787	1119	0.0297451	0.0415986	0.0356719
ACER1_+_6333110.23-P1P2	265	244	243	326	0.0235532	-0.108918	-0.0426823
ACER1_+_6333137.23-P1P2	380	495	454	468	-0.0726002	0.0613589	-0.00562063
ACER1_+_6333164.23-P1P2	359	362	285	312	0.0759426	0.10693	0.0914364
ACER1_+_6333525.23-P1P2	352	323	322	276	0.0244294	0.11117	0.0677996
ACER1_-_6333127.23-P1P2	199	220	132	208	0.141234	0.0613589	0.101297
ACER1_-_6333176.23-P1P2	125	121	100	66	0.0731482	0.332195	0.202671
ACER1_-_6333413.23-P1P2	65	74	68	96	-0.0243388	-0.0944189	-0.0593788
ACER1_-_6333545.23-P1P2	82	158	124	199	-0.15823	-0.0798574	-0.119044
ACER1_-_6333558.23-P1P2	437	483	373	580	0.049604	-0.0563714	-0.00338368
ACER1_-_6333623.23-P1P2	152	286	208	249	-0.121925	0.101956	-0.00998448
ACER2_+_19409007.23-P1P2	297	419	289	336	0.00198076	0.14244	0.0722106
ACER2_+_19409248.23-P1P2	461	597	488	499	-0.0286258	0.122032	0.046703
ACER2_+_19409371.23-P1P2	266	245	212	224	0.0745169	0.0778651	0.076191
ACER2_+_19409376.23-P1P2	615	681	688	766	-0.0487033	-0.0241734	-0.0364383
ACER2_+_19409383.23-P1P2	546	589	518	679	0.0111887	-0.0362738	-0.0125426
ACER2_+_19409433.23-P1P2	245	184	221	231	0.0295228	-0.0782681	-0.0243726
ACER2_+_19409493.23-P1P2	192	154	128	120	0.139404	0.156573	0.147988
ACER2_-_19409274.23-P1P2	503	500	466	584	0.0198233	-0.0427231	-0.0114499
ACER2_-_19409294.23-P1P2	514	552	583	423	-0.0537172	0.164803	0.0555428
ACER2_-_19409474.23-P1P2	328	391	309	400	0.0137429	0.0225359	0.0181394
ACER3_+_76571969.23-P1P2	397	493	420	589	-0.0284081	-0.0538629	-0.0411355
ACER3_+_76572444.23-P1P2	37	12	31	6
ACER3_-_76571770.23-P1P2	21	19	23	17
ACER3_-_76571978.23-P1P2	181	200	154	172	0.0507631	0.108004	0.0793838
ACER3_-_76572000.23-P1P2	405	392	281	352	0.124892	0.0867372	0.105815
ACER3_-_76572003.23-P1P2	438	570	312	565	0.115329	0.0380794	0.0767041
ACER3_-_76572006.23-P1P2	131	127	146	159	-0.0473379	-0.0769067	-0.0621223
ACER3_-_76572045.23-P1P2	177	142	72	168	0.31893	-0.0490473	0.134941
ACER3_-_76572313.23-P1P2	260	226	181	244	0.123676	-0.00399206	0.0598418
ACER3_-_76572404.23-P1P2	556	663	605	821	-0.0386348	-0.0715057	-0.0550702
ACE_+_61554448.23-P1	180	142	135	213	0.0966014	-0.165905	-0.0346516
ACE_+_61554534.23-P1	252	386	294	316	-0.0639603	0.132266	0.0341526
ACE_+_61554651.23-P1	688	742	736	839	-0.0324501	-0.0267543	-0.0296022
ACE_+_61554816.23-P1	139	74	105	94	0.0939964	-0.0840525	0.00497195
ACE_+_61554829.23-P1	542	689	547	705	-0.011279	0.0224377	0.00557931
ACE_+_61562226.23-P2	443	356	418	474	0.0131672	-0.107218	-0.0470253
ACE_+_61562272.23-P2	855	936	714	1077	0.0575492	-0.0353502	0.0110995
ACE_+_61562293.23-P2	521	651	550	661	-0.0276267	0.0262351	-0.000695797
ACE_+_61562404.23-P2	792	744	831	1033	-0.02541	-0.127851	-0.0766306
ACE_+_61562589.23-P2	714	892	773	913	-0.0367945	0.0222834	-0.00725553
ACE_-_61554428.23-P1	849	858	757	1030	0.0337384	-0.0562229	-0.0112423
ACE_-_61554458.23-P1	801	928	774	1090	0.0045186	-0.0454846	-0.020483
ACE_-_61554461.23-P1	671	664	631	657	0.0143937	0.0389596	0.0266766
ACE_-_61554901.23-P1	202	192	170	237	0.0547332	-0.0699383	-0.00760254
ACE_-_61554915.23-P1	109	154	165	233	-0.158606	-0.170149	-0.164378
ACE_-_61562238.23-P2	1	46	14	26
ACE_-_61562443.23-P2	314	284	171	369	0.212906	-0.0951769	0.0588648
ACE_-_61562505.23-P2	711	774	765	788	-0.0345441	0.0249145	-0.00481478
ACE_-_61562601.23-P2	60	188	64	232	-0.0313953	-0.0698056	-0.0506005
ACE_-_61562661.23-P2	1242	1225	1264	1584	-0.0143227	-0.0928085	-0.0535656
ACHE_+_100493137.23-P1	320	295	364	428	-0.0547598	-0.1495	-0.10213
ACHE_+_100493329.23-P1	78	187	26	198	0.391293	0.0055971	0.198445
ACHE_+_100493456.23-P1	980	1096	918	1010	0.015808	0.0739775	0.0448928
ACHE_+_100493473.23-P1	459	483	481	549	-0.0249553	-0.0293247	-0.02714
ACHE_+_100494559.23-P2	25	74	19	68		0.0753762
ACHE_+_100494570.23-P2	142	179	118	138	0.0593386	0.161827	0.110583
ACHE_+_100494596.23-P2	159	330	186	298	-0.0649385	0.0839643	0.00951291
ACHE_-_100493040.23-P1	280	322	239	332	0.0495935	0.0186823	0.0341379
ACHE_-_100493104.23-P1	0	0	0	0
ACHE_-_100493122.23-P1	243	264	168	324	0.126188	-0.067097	0.0295454
ACHE_-_100493407.23-P1	215	219	224	238	-0.0228443	-0.00722493	-0.0150346
ACHE_-_100493427.23-P1	479	588	485	760	-0.0124657	-0.0926012	-0.0525335
ACHE_-_100493486.23-P1	489	574	551	643	-0.0513218	-0.0221523	-0.0367371
ACHE_-_100494233.23-P2	261	384	273	262	-0.0242773	0.22198	0.0988513
ACHE_-_100494236.23-P2	663	681	672	799	-0.0128419	-0.0449417	-0.0288918
ACHE_-_100494326.23-P2	342	343	227	386	0.141001	-0.0244132	0.0582939
ACHE_-_100494356.23-P2	115	171	80	203	0.123938	-0.0507241	0.0366067
ACHE_-_100494415.23-P2	369	375	423	281	-0.0575735	0.17583	0.0591283
ACHE_-_100494526.23-P2	362	383	355	518	-0.000846137	-0.11493	-0.0578883
ACHE_-_100494578.23-P2	806	865	691	1046	0.0480011	-0.059812	-0.00590546
ACIN1_+_23540370.23-P2	804	773	556	874	0.126091	-0.0267246	0.0496831
ACIN1_+_23540783.23-P2	242	199	182	140	0.0956017	0.206895	0.151249
ACIN1_+_23563821.23-P1	538	610	727	766	-0.11735	-0.0783869	-0.0978684
ACIN1_+_23563962.23-P1	381	481	556	544	-0.145296	-0.0268628	-0.0860792
ACIN1_+_23564097.23-P1	892	958	986	1153	-0.0443511	-0.0574858	-0.0509184
ACIN1_+_23564314.23-P1	410	429	491	496	-0.0734582	-0.0377136	-0.0555859
ACIN1_+_23564345.23-P1	536	674	516	638	0.0058771	0.0607692	0.0333232
ACIN1_-_23540292.23-P2	63	89	126	170	-0.259831	-0.284913	-0.272372
ACIN1_-_23540315.23-P2	419	391	358	525	0.0492345	-0.111361	-0.0310632
ACIN1_-_23540722.23-P2	522	676	449	574	0.0468021	0.114278	0.08054
ACIN1_-_23540725.23-P2	470	336	348	433	0.10127	-0.0911413	0.00506454
ACIN1_-_23540730.23-P2	273	270	233	397	0.0496325	-0.156081	-0.0532243
ACIN1_-_23540744.23-P2	208	177	153	269	0.103658	-0.172353	-0.0343477
ACIN1_-_23540756.23-P2	580	455	423	356	0.106767	0.154557	0.130662
ACIN1_-_23540802.23-P2	274	280	319	333	-0.0632016	-0.0516156	-0.0574086
ACIN1_-_23563847.23-P1	117	178	149	145	-0.0958019	0.134705	0.0194516
ACIN1_-_23563913.23-P1	324	380	345	464	-0.0307638	-0.0645951	-0.0476795
ACIN1_-_23564062.23-P1	798	901	1051	1261	-0.108018	-0.131777	-0.119898
ACIN1_-_23564262.23-P1	222	249	202	279	0.0263664	-0.0222723	0.00204706
ACIN1_-_23564284.23-P1	312	427	457	485	-0.146644	-0.0289717	-0.087808
ACKR2_+_42850956.23-P1P2	197	273	169	369	0.0477689	-0.114627	-0.0334292
ACKR2_-_42850976.23-P1P2	168	193	287	147	-0.202549	0.167797	-0.0173758
ACKR2_-_42850987.23-P1P2	347	327	328	521	0.0125214	-0.195608	-0.0915432
ACKR2_-_42850992.23-P1P2	736	699	566	820	0.0874997	-0.0448702	0.0213147
ACKR2_-_42851020.23-P1P2	774	824	851	863	-0.0424069	0.0109711	-0.0157179
ACKR2_-_42851024.23-P1P2	191	190	170	155	0.0343849	0.133991	0.0841878
ACKR2_-_42851391.23-P1P2	228	270	213	308	0.0167886	-0.0310953	-0.00715338
ACKR2_-_42851412.23-P1P2	397	531	386	480	0.0022691	0.0834604	0.0428648
ACKR2_-_42851475.23-P1P2	555	521	586	570	-0.0276934	-0.0105177	-0.0191055
ACKR2_-_42851479.23-P1P2	445	494	503	518	-0.0524642	0.0103825	-0.0210409
ACKR3_+_237476442.23-P2	117	92	96	100	0.0639477	-0.00731487	0.0283164
ACKR3_+_237476473.23-P2	310	429	401	339	-0.101477	0.149677	0.0241001
ACKR3_+_237476736.23-P2	317	364	301	488	0.010879	-0.110608	-0.0498644
ACKR3_+_237476822.23-P2	229	215	190	248	0.0599039	-0.0365672	0.0116683
ACKR3_+_237476887.23-P2	825	1092	910	965	-0.0435774	0.094619	0.0255208
ACKR3_+_237478500.23-P1	303	320	394	371	-0.103377	-0.0390736	-0.0712254
ACKR3_+_237478916.23-P1	267	154	156	145	0.187346	0.0633922	0.125369
ACKR3_+_237478950.23-P1	419	407	281	421	0.137242	0.0170888	0.0771653
ACKR3_-_237476457.23-P2	83	117	78	128	0.0146366	-0.0105029	0.00206684
ACKR3_-_237476493.23-P2	620	556	538	530	0.0436101	0.0573222	0.0504662
ACKR3_-_237476505.23-P2	401	560	524	699	-0.105162	-0.075428	-0.0902951
ACKR3_-_237476881.23-P2	384	424	516	500	-0.115313	-0.047441	-0.0813773
ACKR3_-_237476900.23-P2	341	410	333	435	0.000685069	0.00459732	0.0026412
ACKR3_-_237478572.23-P1	7	10	3	5
ACKR3_-_237478578.23-P1	279	319	256	326	0.0233228	0.0230533	0.023188
ACKR3_-_237478586.23-P1	243	348	182	493	0.0971003	-0.137761	-0.0203302
ACKR3_-_237478610.23-P1	96	130	71	181	0.101684	-0.129221	-0.0137683
ACKR3_-_237478615.23-P1	476	550	506	618	-0.0301526	-0.0236565	-0.0269045
ACKR3_-_237478884.23-P1	573	653	402	584	0.120859	0.0887291	0.104794
ACKR3_-_237478929.23-P1	421	485	436	522	-0.0206644	-0.0024585	-0.0115615
ACKR4_+_132316216.23-P1P2	229	292	331	308	-0.141817	0.00747429	-0.0671714
ACKR4_+_132316328.23-P1P2	411	370	332	362	0.0696285	0.0445042	0.0570664
ACKR4_+_132316377.23-P1P2	179	189	191	302	-0.0315221	-0.197031	-0.114277
ACKR4_+_132316545.23-P1P2	609	686	549	732	0.0297497	0.00178382	0.0157667
ACKR4_-_132316111.23-P1P2	252	290	191	305	0.0927761	0.00890966	0.0508429
ACKR4_-_132316167.23-P1P2	418	273	198	295	0.263595	-0.0044206	0.129587
ACKR4_-_132316171.23-P1P2	93	113	36	94	0.336953	0.124386	0.23067
ACKR4_-_132316248.23-P1P2	262	384	240	378	0.0239301	0.0414955	0.0327128
ACKR4_-_132316406.23-P1P2	388	493	500	553	-0.100101	-0.0228089	-0.061455
ACKR4_-_132316525.23-P1P2	451	529	546	416	-0.0774064	0.152063	0.0373285
ACLY_+_40074710.23-P1P2	174	220	158	277	0.0271116	-0.0796999	-0.0262942
ACLY_+_40074807.23-P1P2	466	524	536	587	-0.0587992	-0.0221611	-0.0404802
ACLY_+_40075121.23-P1P2	190	302	153	308	0.0707652	0.0240546	0.0474099
ACLY_-_40074750.23-P1P2	170	88	70	92	0.314503	0.0118537	0.163178
ACLY_-_40074817.23-P1P2	46	71	71	124	-0.165671	-0.240815	-0.203243
ACLY_-_40075090.23-P1P2	125	88	158	87	-0.0930797	0.0393685	-0.0268556
ACLY_-_40075168.23-P1P2	419	466	402	381	0.00710955	0.132901	0.0700054
ACLY_-_40075192.23-P1P2	288	427	318	400	-0.0439516	0.0659037	0.010976
ACLY_-_40075221.23-P1P2	58	72	39	36	0.136284	0.375038	0.255661
ACLY_-_40075227.23-P1P2	68	34	53	68	0.0826228	-0.307556	-0.112466
ACMSD_+_135596183.23-P1P2	441	526	496	487	-0.0506527	0.0716733	0.0105103
ACMSD_+_135596266.23-P1P2	608	705	658	656	-0.0366615	0.0692113	0.0162749
ACMSD_-_135596118.23-P1P2	551	480	563	521	-0.0157714	-0.00661683	-0.0111941
ACMSD_-_135596123.23-P1P2	1008	990	792	911	0.0796961	0.0746891	0.0771926
ACMSD_-_135596149.23-P1P2	707	713	635	928	0.0310891	-0.0960277	-0.0324693
ACMSD_-_135596200.23-P1P2	406	485	329	537	0.0684792	-0.0164081	0.0260355
ACMSD_-_135596315.23-P1P2	466	479	440	422	0.0129211	0.0961243	0.0545227
ACMSD_-_135596354.23-P1P2	793	708	851	784	-0.033594	-0.0164651	-0.0250295
ACMSD_-_135596438.23-P1P2	407	416	419	491	-0.0185016	-0.0478764	-0.033189
ACMSD_-_135596683.23-P1P2	590	734	632	725	-0.0329318	0.0398159	0.00344205
ACN9_+_96747038.23-P1P2	26	52	54	61	-0.273546	-0.0448587	-0.159202
ACN9_+_96747061.23-P1P2	113	110	82	87	0.108589	0.149242	0.128915
ACN9_+_96747104.23-P1P2	444	502	439	499	-0.00382647	0.0366926	0.016433
ACN9_+_96747221.23-P1P2	635	394	422	454	0.14055	-0.0360529	0.0522486
ACN9_+_96747240.23-P1P2	466	459	364	495	0.0818291	-0.00343779	0.0391957
ACN9_+_96747363.23-P1P2	359	435	377	497	-0.0257205	-0.0318665	-0.0287935
ACN9_-_96747019.23-P1P2	135	170	188	256	-0.128288	-0.167832	-0.14806
ACN9_-_96747046.23-P1P2	593	572	539	657	0.0267549	-0.0344766	-0.00386087
ACN9_-_96747065.23-P1P2	659	542	657	680	-0.00683747	-0.0779455	-0.0423915
ACN9_-_96747455.23-P1P2	76	71	37	52	0.253638	0.187088	0.220363
ACO1_+_32384680.23-P1P2	127	153	95	254	0.0975565	-0.215848	-0.0591459
ACO1_+_32384714.23-P1P2	161	183	165	206	-0.0168602	-0.0245526	-0.0207064
ACO1_+_32385057.23-P1P2	873	575	655	577	0.0964627	0.0320315	0.0642471
ACO1_-_32384671.23-P1P2	231	255	154	218	0.139404	0.110932	0.125168
ACO1_-_32384696.23-P1P2	612	728	533	671	0.0422837	0.0738865	0.0580851
ACO1_-_32384733.23-P1P2	517	483	513	575	-0.00511949	-0.0521082	-0.0286139
ACO1_-_32384889.23-P1P2	522	554	509	574	0.00122275	0.0162788	0.00875078
ACO1_-_32385047.23-P1P2	864	922	865	899	-0.00836238	0.04618	0.0189088
ACO1_-_32385064.23-P1P2	381	398	330	387	0.0442809	0.0475415	0.0459112
ACO1_-_32385115.23-P1P2	307	261	304	358	-0.00437343	-0.121859	-0.0631164
ACO2_+_41865203.23-P1P2	398	489	410	470	-0.0187369	0.0532544	0.0172588
ACO2_+_41865228.23-P1P2	228	297	375	322	-0.188762	-0.00605328	-0.0974078
ACO2_+_41865231.23-P1P2	205	289	284	293	-0.126397	0.0269729	-0.0497122
ACO2_+_41865345.23-P1P2	238	264	296	236	-0.0871953	0.0889463	0.000875498
ACO2_+_41865484.23-P1P2	481	522	382	499	0.0758021	0.0559289	0.0658655
ACO2_+_41865560.23-P1P2	742	810	784	936	-0.0279507	-0.0374488	-0.0326998
ACO2_-_41865209.23-P1P2	185	184	120	189	0.14936	0.0205397	0.0849501
ACO2_-_41865357.23-P1P2	141	207	157	184	-0.0470023	0.0917361	0.0223669
ACO2_-_41865534.23-P1P2	249	353	208	382	0.0574389	-0.00513406	0.0261524
ACO2_-_41865573.23-P1P2	226	222	186	259	0.0628439	-0.0421607	0.0103416
ACOT11_+_55007947.23-P2	175	163	195	252	-0.0472668	-0.180782	-0.114024
ACOT11_+_55007958.23-P2	243	229	271	245	-0.0475734	0.000487202	-0.0235431
ACOT11_+_55007963.23-P2	90	76	37	37	0.315081	0.388169	0.351625
ACOT11_+_55008024.23-P2	99	58	115	167	-0.0623837	-0.486983	-0.274684
ACOT11_+_55008184.23-P2	468	458	463	428	-0.00403867	0.0670984	0.0315299
ACOT11_+_55008406.23-P2	836	808	922	771	-0.0435248	0.0568212	0.00664817
ACOT11_+_55013888.23-P1	445	476	380	548	0.0494398	-0.0356152	0.00691229
ACOT11_+_55013964.23-P1	246	386	364	372	-0.15033	0.0519317	-0.0491991
ACOT11_+_55013970.23-P1	508	401	476	680	0.015702	-0.226304	-0.105301
ACOT11_+_55014110.23-P1	10	97	7	44		0.422984
ACOT11_-_55008004.23-P2	116	129	95	67	0.0646336	0.356314	0.210474
ACOT11_-_55008353.23-P2	171	124	159	157	0.0184987	-0.0824446	-0.031973
ACOT11_-_55008376.23-P2	325	329	297	392	0.0247977	-0.0525271	-0.0138647
ACOT11_-_55008399.23-P2	65	98	74	132	-0.0550668	-0.112909	-0.0839878
ACOT11_-_55013905.23-P1	152	321	207	283	-0.120174	0.0957791	-0.0121972
ACOT11_-_55013950.23-P1	864	773	737	832	0.049833	-0.00247558	0.0236787
ACOT11_-_55014024.23-P1	98	102	87	123	0.0353241	-0.0584394	-0.0115577
ACOT11_-_55014173.23-P1	210	142	151	158	0.111917	-0.01883	0.0465435
ACOT11_-_55014234.23-P1	176	320	239	198	-0.119135	0.270114	0.0754895
ACOT11_-_55014292.23-P1	81	110	150	78	-0.231864	0.20301	-0.0144268
ACOT12_+_80689507.23-P1P2	348	345	354	364	-0.0141541	0.00734456	-0.00340478
ACOT12_+_80689555.23-P1P2	93	185	89	133	0.00803414	0.196232	0.102133
ACOT12_+_80689628.23-P1P2	373	349	317	397	0.0511745	-0.02971	0.0107323
ACOT12_+_80689672.23-P1P2	503	424	395	479	0.0798932	-0.0263139	0.0267896
ACOT12_+_80689920.23-P1P2	218	164	192	160	0.0382096	0.0458995	0.0420545
ACOT12_+_80689929.23-P1P2	156	281	117	370	0.0966014	-0.101738	-0.00256848
ACOT12_+_80689961.23-P1P2	149	229	221	263	-0.1512	-0.034421	-0.0928105
ACOT12_-_80689574.23-P1P2	242	378	283	305	-0.0648173	0.139399	0.0372908
ACOT12_-_80689897.23-P1P2	602	759	654	764	-0.0380496	0.0305082	-0.00377073
ACOT12_-_80689916.23-P1P2	54	123	55	138	-0.0146101	-0.0229175	-0.0187638
ACOT13_+_24667341.23-P1P2	473	484	342	502	0.109903	0.0157615	0.0628322
ACOT13_+_24667625.23-P1P2	0	0	7	9
ACOT13_-_24667290.23-P1P2	137	160	177	99	-0.101034	0.270114	0.0845401
ACOT13_-_24667329.23-P1P2	702	869	662	711	0.0133778	0.132549	0.0729634
ACOT13_-_24667371.23-P1P2	412	531	293	506	0.115923	0.0574867	0.0867048
ACOT13_-_24667374.23-P1P2	0	0	0	0
ACOT13_-_24667386.23-P1P2	277	311	182	293	0.14469	0.0630975	0.103894
ACOT13_-_24667473.23-P1P2	1026	1220	1261	1261	-0.0828885	0.0174657	-0.0327114
ACOT13_-_24667530.23-P1P2	62	88	63	86	-0.0137565	0.0450609	0.0156522
ACOT13_-_24667815.23-P1P2	555	380	401	405	0.110165	0.00236832	0.0562667
ACOT1_+_74003818.23-P1P2	672	722	662	899	-0.00249366	-0.0742186	-0.0383562
ACOT1_+_74003838.23-P1P2	79	126	65	133	0.0629428	0.00711916	0.035031
ACOT1_+_74003843.23-P1P2	477	533	513	571	-0.0343827	-0.000168451	-0.0172756
ACOT1_+_74004100.23-P1P2	771	728	806	823	-0.0240753	-0.0266527	-0.025364
ACOT1_-_74004062.23-P1P2	381	388	282	303	0.101402	0.155495	0.128449
ACOT1_-_74004076.23-P1P2	508	638	411	651	0.069058	0.0238091	0.0464335
ACOT1_-_74004103.23-P1P2	282	324	295	322	-0.0243198	0.03679	0.00623511
ACOT1_-_74004113.23-P1P2	131	155	134	193	-0.0161703	-0.0742222	-0.0451962
ACOT1_-_74004496.23-P1P2	99	169	52	167	0.226042	0.039603	0.132823
ACOT1_-_74004524.23-P1P2	47	55	42	58		0.00759057
ACOT2_+_74035740.23-P1P2	298	209	277	301	0.0186137	-0.14587	-0.0636281
ACOT2_+_74035970.23-P1P2	135	122	99	141	0.104768	-0.0375264	0.0336208
ACOT2_+_74036024.23-P1P2	519	564	526	572	-0.0128106	0.026806	0.00699771
ACOT2_+_74036035.23-P1P2	753	813	696	767	0.0206632	0.0624199	0.0415415
ACOT2_+_74036054.23-P1P2	322	286	348	329	-0.0361603	-0.0352255	-0.0356929
ACOT2_-_74036039.23-P1P2	573	573	487	544	0.0511545	0.059314	0.0552343
ACOT2_-_74036051.23-P1P2	287	511	249	451	0.0436713	0.0952415	0.0694564
ACOT2_-_74036080.23-P1P2	540	497	656	671	-0.0786565	-0.114063	-0.0963599
ACOT2_-_74036118.23-P1P2	413	489	407	460	-0.00262389	0.0638438	0.0306099
ACOT2_-_74036501.23-P1P2	573	720	624	747	-0.0389271	0.0156144	-0.0116563
ACOT4_+_74058581.23-P1P2	301	320	252	261	0.0566272	0.13409	0.0953586
ACOT4_+_74058635.23-P1P2	445	515	427	360	0.00706283	0.210047	0.108555
ACOT4_+_74058647.23-P1P2	30	97	0	65		0.230856
ACOT4_+_74058687.23-P1P2	326	422	354	493	-0.037886	-0.042827	-0.0403565
ACOT4_+_74058910.23-P1P2	1522	1600	1585	1617	-0.0226812	0.0285372	0.00292799
ACOT4_+_74058918.23-P1P2	276	246	131	231	0.262864	0.0647192	0.163792
ACOT4_+_74059053.23-P1P2	466	476	411	566	0.0376982	-0.0515286	-0.00691522
ACOT4_+_74059070.23-P1P2	300	214	282	205	0.0145435	0.0548971	0.0347203
ACOT4_-_74059158.23-P1P2	144	145	120	208	0.0583135	-0.143914	-0.0428004
ACOT4_-_74059268.23-P1P2	517	441	440	467	0.0506627	0.00553507	0.0280989
ACOT6_+_74077704.23-P1P2	475	656	712	773	-0.155033	-0.0470686	-0.101051
ACOT6_+_74077926.23-P1P2	648	642	769	676	-0.0701561	0.00833164	-0.0309122
ACOT6_+_74078053.23-P1P2	481	659	669	787	-0.127834	-0.0536599	-0.0907467
ACOT6_+_74078097.23-P1P2	427	419	391	361	0.0240649	0.107103	0.0655842
ACOT6_+_74078110.23-P1P2	849	785	756	1074	0.0342188	-0.120603	-0.0431923
ACOT6_-_74077642.23-P1P2	501	649	493	681	-0.00209241	0.0100428	0.00397518
ACOT6_-_74077963.23-P1P2	252	272	206	390	0.0653022	-0.143688	-0.0391929
ACOT6_-_74077984.23-P1P2	644	871	686	853	-0.0309012	0.0440234	0.00656112
ACOT6_-_74078059.23-P1P2	149	165	111	191	0.0990486	-0.0383089	0.0303699
ACOT6_-_74078124.23-P1P2	160	24	98	49	0.170199
ACOT7_+_6453356.23-P1P2	200	257	106	202	0.222772	0.152312	0.187542
ACOT7_-_6453209.23-P1P2	412	439	306	479	0.100147	-0.00919558	0.0454756
ACOT7_-_6453318.23-P1P2	7	24	77	28	-0.879335
ACOT7_-_6453331.23-P1P2	97	185	109	175	-0.0503278	0.0611031	0.00538764
ACOT7_-_6453334.23-P1P2	377	381	450	519	-0.0722646	-0.118458	-0.0953613
ACOT7_-_6453354.23-P1P2	681	592	697	784	-0.0163813	-0.104572	-0.0604764
ACOT7_-_6453369.23-P1P2	393	302	443	334	-0.0514628	-0.0158491	-0.0336559
ACOT7_-_6453388.23-P1P2	994	1023	720	953	0.109249	0.0686415	0.0889453
ACOT7_-_6453406.23-P1P2	344	339	337	355	-0.000470998	0.0110334	0.00528121
ACOT7_-_6453466.23-P1P2	167	174	148	68	0.0359499	0.496363	0.266156
ACOT8_+_44485553.23-P1P2	229	312	209	443	0.0252682	-0.138873	-0.0568026
ACOT8_+_44485579.23-P1P2	450	474	415	522	0.0214821	-0.0137546	0.00386372
ACOT8_+_44485987.23-P1P2	723	697	730	995	-0.0114435	-0.141528	-0.0764856
ACOT8_+_44486016.23-P1P2	247	176	140	196	0.198376	-0.0192548	0.0895608
ACOT8_+_44486037.23-P1P2	417	387	330	400	0.0770911	0.0174728	0.0472819
ACOT8_-_44485597.23-P1P2	54	49	64	40	-0.0696832
ACOT8_-_44485644.23-P1P2	201	274	215	291	-0.0324108	0.00410184	-0.0141545
ACOT8_-_44485808.23-P1P2	24	77	57	53	-0.322281	0.217655	-0.0523135
ACOT8_-_44485992.23-P1P2	325	510	356	557	-0.0410497	-0.00966499	-0.0253574
ACOT8_-_44486001.23-P1P2	439	570	364	505	0.0601392	0.0933584	0.0767488
ACOT9_+_23761133.23-P1P2	837	891	701	835	0.0564945	0.0657034	0.061099
ACOT9_+_23761144.23-P1P2	325	325	327	274	-0.0101715	0.11779	0.0538094
ACOT9_+_23761350.23-P1P2	247	318	235	337	0.0101563	0.00516718	0.00766173
ACOT9_+_23761355.23-P1P2	170	120	179	150	-0.0266888	-0.0761319	-0.0514104
ACOT9_+_23761360.23-P1P2	312	364	374	400	-0.0738091	-0.0126962	-0.0432526
ACOT9_-_23760942.23-P1P2	473	461	574	572	-0.0782721	-0.0724869	-0.0753795
ACOT9_-_23761181.23-P1P2	86	47	54	41	0.161171
ACOT9_-_23761296.23-P1P2	168	177	219	187	-0.104282	0.00668012	-0.0488009
ACOT9_-_23761316.23-P1P2	507	433	464	497	0.0242648	-0.0341356	-0.0049354
ACOT9_-_23761394.23-P1P2	583	422	491	598	0.0544693	-0.137898	-0.0417143
ACOX1_+_73974830.23-P1P2	369	507	436	582	-0.0685736	-0.0341883	-0.051381
ACOX1_+_73975184.23-P1P2	757	791	867	997	-0.0572465	-0.0802233	-0.0687349
ACOX1_+_73975227.23-P1P2	229	305	206	312	0.0305223	0.0225682	0.0265452
ACOX1_+_73975249.23-P1P2	978	1238	928	1248	0.0111284	0.0297799	0.0204541
ACOX1_-_73974792.23-P1P2	120	192	88	216	0.104768	-0.0242537	0.0402572
ACOX1_-_73974876.23-P1P2	715	842	618	846	0.0450394	0.0314076	0.0382235
ACOX1_-_73975169.23-P1P2	1143	1046	1163	1110	-0.0142457	0.00449994	-0.00487289
ACOX1_-_73975193.23-P1P2	519	461	577	458	-0.04644	0.0369559	-0.00474202
ACOX1_-_73975196.23-P1P2	633	563	760	816	-0.0743889	-0.149001	-0.111695
ACOX1_-_73975245.23-P1P2	425	486	340	445	0.0731482	0.0771374	0.0751428
ACOX2_+_58512259.23-P2	190	135	172	113	0.028227	0.12133	0.0747787
ACOX2_+_58512291.23-P2	268	226	259	187	0.0044713	0.127012	0.0657418
ACOX2_+_58512428.23-P2	738	812	612	951	0.0600905	-0.0440628	0.00801386
ACOX2_+_58512441.23-P2	387	280	373	303	0.00544788	-0.00512946	0.000159213
ACOX2_+_58522495.23-P1	145	169	138	242	0.010039	-0.143045	-0.0665031
ACOX2_+_58522520.23-P1	658	647	599	665	0.0261969	0.0202297	0.0232133
ACOX2_+_58522693.23-P1	109	119	59	229	0.215116	-0.288575	-0.0367293
ACOX2_+_58522852.23-P1	1302	1230	1117	1296	0.0477507	0.00800486	0.0278778
ACOX2_+_58522860.23-P1	310	353	405	475	-0.105084	-0.112422	-0.108753
ACOX2_+_58522888.23-P1	20	24	29	19
ACOX2_+_58522893.23-P1	390	425	406	345	-0.022553	0.136426	0.0569365
ACOX2_-_58512038.23-P2	709	632	649	676	0.0241908	0.000601694	0.0123962
ACOX2_-_58512043.23-P2	614	816	559	978	0.0261613	-0.0554279	-0.0146333
ACOX2_-_58512058.23-P2	316	431	346	414	-0.0409011	0.0535559	0.0063274
ACOX2_-_58512157.23-P2	115	138	157	135	-0.121073	0.0445633	-0.0382549
ACOX2_-_58512421.23-P2	235	222	312	290	-0.110936	-0.0978265	-0.104381
ACOX2_-_58512435.23-P2	338	348	391	398	-0.0608754	-0.0323616	-0.0466185
ACOX2_-_58522790.23-P1	113	227	202	219	-0.219033	0.0514072	-0.0838131
ACOX2_-_58522878.23-P1	353	505	317	459	0.0311475	0.0807682	0.0559579
ACOX2_-_58522905.23-P1	227	351	235	341	-0.0205285	0.047973	0.0137222
ACOX3_+_8429824.23-P1	464	465	570	506	-0.0827121	-0.00786519	-0.0452886
ACOX3_+_8430042.23-P1	90	85	73	43	0.0681357	0.369279	0.218707
ACOX3_+_8430113.23-P1	1043	892	901	1234	0.0452419	-0.126063	-0.0404106
ACOX3_+_8430140.23-P1	536	636	645	579	-0.0752131	0.0799744	0.00238067
ACOX3_+_8430181.23-P1	142	150	87	112	0.170094	0.177585	0.17384
ACOX3_+_8430200.23-P1	163	132	169	157	-0.0210784	-0.0516604	-0.0363694
ACOX3_+_8442240.23-P2	388	370	342	343	0.037917	0.0710506	0.0544838
ACOX3_+_8442373.23-P2	619	692	578	831	0.0169622	-0.0563873	-0.0197125
ACOX3_+_8442383.23-P2	390	341	385	384	-0.00325294	-0.0247348	-0.0139939
ACOX3_+_8442429.23-P2	185	201	187	201	-0.0118496	0.0337412	0.0109458
ACOX3_+_8442463.23-P2	92	97	98	91	-0.0309012	0.0651808	0.0171398
ACOX3_+_8442467.23-P2	439	399	394	369	0.0313591	0.0722285	0.0517938
ACOX3_-_8429711.23-P1	182	202	219	250	-0.0751945	-0.0712325	-0.0732135
ACOX3_-_8430094.23-P1	147	289	225	253	-0.162629	0.099247	-0.0316912
ACOX3_-_8430121.23-P1	447	478	412	393	0.0216878	0.130151	0.0759195
ACOX3_-_8430129.23-P1	381	463	461	612	-0.0772054	-0.103637	-0.0904215
ACOX3_-_8442139.23-P2	394	309	310	387	0.0791933	-0.0770871	0.00105314
ACOX3_-_8442145.23-P2	89	71	70	116	0.0793251	-0.207977	-0.0643259
ACOX3_-_8442419.23-P2	333	355	346	432	-0.0218589	-0.0629183	-0.0423886
ACOX3_-_8442435.23-P2	496	509	591	488	-0.0716241	0.0544867	-0.0085687
ACOXL_+_111490261.23-P1P2	71	78	43	96	0.174295	-0.0684978	0.0528988
ACOXL_+_111490271.23-P1P2	889	1010	927	835	-0.0231526	0.12743	0.0521385
ACOXL_+_111490383.23-P1P2	191	238	189	336	-0.00411673	-0.136054	-0.0700853
ACOXL_+_111490544.23-P1P2	308	500	411	488	-0.11278	0.0457026	-0.0335389
ACOXL_+_111490547.23-P1P2	386	458	278	633	0.111332	-0.125596	-0.00713224
ACOXL_+_111490560.23-P1P2	307	512	375	463	-0.0806503	0.0832742	0.00131192
ACOXL_+_111490595.23-P1P2	530	544	374	548	0.118747	0.0301339	0.0744403
ACOXL_-_111490250.23-P1P2	119	120	92	185	0.0855733	-0.179396	-0.0469112
ACOXL_-_111490612.23-P1P2	494	438	371	416	0.0961113	0.0591157	0.0776135
ACOXL_-_111490664.23-P1P2	174	239	232	184	-0.112485	0.162514	0.0250143
ACP1_+_264980.23-P1P2	138	176	83	120	0.176815	0.222322	0.199568
ACP1_+_265303.23-P1P2	288	390	182	383	0.158841	0.0426592	0.10075
ACP1_-_264936.23-P1P2	827	844	769	814	0.0184821	0.0515617	0.0350219
ACP1_-_264967.23-P1P2	512	524	472	549	0.0216189	0.0107926	0.0162058
ACP1_-_264970.23-P1P2	63	71	72	50	-0.0564672	0.2064	0.0749665
ACP1_-_264976.23-P1P2	508	575	370	385	0.107248	0.231251	0.169249
ACP1_-_265107.23-P1P2	107	119	98	103	0.0239867	0.104839	0.064413
ACP1_-_265135.23-P1P2	60	52	53	50	0.0371386	0.053053	0.0450958
ACP1_-_265335.23-P1P2	0	2	2	39
ACP1_-_265360.23-P1P2	427	579	395	601	0.0203661	0.0153788	0.0178725
ACP2_+_47270142.23-P1P2	263	377	267	413	-0.0134274	-0.0111657	-0.0122966
ACP2_+_47270309.23-P1P2	438	557	533	663	-0.0792782	-0.0520375	-0.0656579
ACP2_+_47270320.23-P1P2	804	979	805	1059	-0.00839373	-0.00493521	-0.00666447
ACP2_+_47270332.23-P1P2	419	420	503	358	-0.0743421	0.112386	0.019022
ACP2_-_47269906.23-P1P2	490	373	374	314	0.0902301	0.118523	0.104377
ACP2_-_47269915.23-P1P2	391	304	298	430	0.0907623	-0.136998	-0.0231178
ACP2_-_47269943.23-P1P2	640	532	607	641	0.0112961	-0.0580329	-0.0233684
ACP2_-_47269958.23-P1P2	1030	1369	1161	1562	-0.0514492	-0.0311981	-0.0413237
ACP2_-_47270292.23-P1P2	326	335	411	362	-0.0921401	-0.00442558	-0.0482828
ACP2_-_47270385.23-P1P2	185	262	206	343	-0.0470148	-0.0989011	-0.0729579
ACP5_+_11688472.23-P1	393	441	427	494	-0.0380949	-0.0221402	-0.0301175
ACP5_+_11688484.23-P1	441	383	315	376	0.114332	0.0428237	0.0785777
ACP5_+_11689300.23-P2	535	597	477	612	0.0337581	0.0215225	0.0276403
ACP5_+_11689329.23-P2	580	625	553	509	0.00938125	0.13483	0.0721057
ACP5_+_11689378.23-P2	509	345	416	605	0.0653784	-0.242825	-0.0887233
ACP5_+_11689751.23-P2	340	357	396	332	-0.063349	0.0694889	0.00306995
ACP5_-_11688043.23-P1	1315	1571	1302	1685	-0.00433161	-0.000752136	-0.00254187
ACP5_-_11688058.23-P1	41	67	50	63	-0.0800589	0.0640515	-0.00800372
ACP5_-_11688064.23-P1	9	0	12	0
ACP5_-_11688086.23-P1	567	640	418	658	0.10285	0.0200839	0.0614672
ACP5_-_11688218.23-P1	186	197	192	239	-0.0194795	-0.0614175	-0.0404485
ACP5_-_11688414.23-P1	478	512	620	706	-0.102465	-0.124458	-0.113462
ACP5_-_11688437.23-P1	731	892	895	890	-0.0814978	0.0348464	-0.0233257
ACP5_-_11688455.23-P1	519	671	642	707	-0.0852314	0.00800826	-0.0386116
ACP5_-_11689356.23-P2	779	692	583	880	0.0973798	-0.0845972	0.00639127
ACP5_-_11689724.23-P2	167	226	168	158	-0.0101116	0.209986	0.0999374
ACP5_-_11689727.23-P2	451	541	560	690	-0.0866069	-0.086043	-0.086325
ACP5_-_11689744.23-P2	160	252	118	205	0.102709	0.135379	0.119044
ACP5_-_11689771.23-P2	503	483	538	392	-0.0323873	0.136529	0.0520711
ACP5_-_11689778.23-P2	84	143	97	83	-0.0602331	0.301602	0.120684
ACP6_+_147141933.23-P1P2	278	175	288	247	-0.0207843	-0.135937	-0.0783605
ACP6_+_147141956.23-P1P2	252	211	277	264	-0.0423154	-0.0765984	-0.0594569
ACP6_+_147142089.23-P1P2	375	339	418	358	-0.047391	0.00688988	-0.0202506
ACP6_+_147142126.23-P1P2	425	609	562	648	-0.10948	0.0031775	-0.0531514
ACP6_+_147142159.23-P1P2	449	465	357	508	0.0753807	-0.00980755	0.0327866
ACP6_+_147142188.23-P1P2	453	568	381	589	0.0549598	0.0158652	0.0354125
ACP6_-_147141887.23-P1P2	10	21	47	28
ACP6_-_147142348.23-P1P2	391	358	415	326	-0.0295901	0.0798462	0.0251281
ACP6_-_147142356.23-P1P2	317	223	229	282	0.110228	-0.0818395	0.0141943
ACP6_-_147142393.23-P1P2	444	556	597	578	-0.115542	0.0146338	-0.050454
ACPL2_+_140950667.23-P1P2	60	132	122	136	-0.265838	0.019042	-0.123398
ACPL2_+_140950939.23-P1P2	142	198	283	194	-0.258549	0.0437902	-0.10738
ACPL2_+_140950942.23-P1P2	454	657	559	729	-0.0835481	-0.017462	-0.0505051
ACPL2_+_140950963.23-P1P2	193	161	185	238	0.00744225	-0.158716	-0.0756371
ACPL2_+_140951037.23-P1P2	167	262	154	280	0.0215083	0.00102445	0.0112664
ACPL2_+_140951054.23-P1P2	19	12	27	11
ACPL2_+_140951088.23-P1P2	549	581	567	605	-0.0196656	0.0138105	-0.00292756
ACPL2_+_140951203.23-P1P2	769	795	739	874	0.00651874	-0.0129067	-0.003194
ACPL2_-_140950647.23-P1P2	385	539	308	728	0.0731482	-0.114263	-0.0205576
ACPL2_-_140951141.23-P1P2	257	298	214	378	0.0585964	-0.0833489	-0.0123762
ACPP_+_132036268.23-P1P2	582	574	587	775	-0.0110507	-0.11409	-0.0625704
ACPP_+_132036293.23-P1P2	449	658	397	690	0.0367876	0.0103593	0.0235734
ACPP_+_132036338.23-P1P2	602	573	504	517	0.0566272	0.0843797	0.0705034
ACPP_+_132036344.23-P1P2	337	484	409	564	-0.0783078	-0.041579	-0.0599434
ACPP_+_132036504.23-P1P2	522	510	466	583	0.0332972	-0.0321287	0.000584285
ACPP_+_132036703.23-P1P2	701	745	732	767	-0.0236673	0.0194114	-0.00212792
ACPP_+_132036714.23-P1P2	384	468	355	629	0.0205938	-0.11184	-0.0456229
ACPP_+_132036719.23-P1P2	119	208	130	212	-0.0400705	0.0243621	-0.00785421
ACPP_-_132036256.23-P1P2	152	240	125	219	0.0631268	0.0788277	0.0709773
ACPP_-_132036481.23-P1P2	589	605	565	732	0.00717555	-0.0600843	-0.0264544
ACPT_+_51293697.23-ENST00000270593.1	669	563	634	396	0.0115853	0.206995	0.10929
ACPT_+_51293752.23-ENST00000270593.1	219	122	192	161	0.0398727	-0.102839	-0.0314831
ACPT_+_51293761.23-ENST00000270593.1	387	413	295	363	0.0907025	0.0972812	0.0939918
ACPT_+_51294074.23-ENST00000270593.1	323	463	477	428	-0.149618	0.0724447	-0.0385868
ACPT_+_51294085.23-ENST00000270593.1	181	200	171	203	0.0127112	0.0264102	0.0195607
ACPT_+_51294143.23-ENST00000270593.1	593	975	605	794	-0.0152224	0.134855	0.0598163
ACPT_-_51293907.23-ENST00000270593.1	315	343	333	337	-0.0281361	0.0424306	0.00714726
ACPT_-_51293910.23-ENST00000270593.1	459	386	334	489	0.107586	-0.0827208	0.0124326
ACPT_-_51294111.23-ENST00000270593.1	57	34	30	80	0.225307	-0.387578	-0.0811354
ACPT_-_51294122.23-ENST00000270593.1	102	182	135	180	-0.109804	0.039182	-0.0353108
ACRBP_+_6756117.23-P1P2	224	200	183	180	0.0655227	0.0856194	0.0755711
ACRBP_+_6756534.23-P1P2	76	116	69	64	0.0271721	0.326567	0.17687
ACRBP_+_6756555.23-P1P2	614	648	501	694	0.0659693	-2.74e-05	0.032971
ACRBP_+_6756569.23-P1P2	260	220	206	259	0.0766593	-0.0466167	0.0150213
ACRBP_+_6756572.23-P1P2	364	523	504	529	-0.1262	0.0281245	-0.0490379
ACRBP_-_6756113.23-P1P2	266	350	231	330	0.0433258	0.0627135	0.0530197
ACRBP_-_6756126.23-P1P2	603	688	525	664	0.0423957	0.0512242	0.0468099
ACRBP_-_6756147.23-P1P2	1053	1109	948	1101	0.0302309	0.037306	0.0337684
ACRBP_-_6756321.23-P1P2	251	304	212	296	0.053424	0.0468723	0.0501481
ACRBP_-_6756581.23-P1P2	114	78	131	82	-0.0584541	0.00911668	-0.0246687
ACRC_+_70798298.23-P1P2	483	599	486	433	-0.0101922	0.193533	0.0916702
ACRC_-_70797923.23-P1P2	516	455	540	606	-0.024463	-0.107368	-0.0659157
ACRC_-_70798359.23-P1P2	296	380	393	424	-0.110948	-0.0202059	-0.0655767
ACRC_-_70798376.23-P1P2	303	510	429	544	-0.134305	0.00196322	-0.0661707
ACRC_-_70798668.23-P1P2	425	473	518	441	-0.0798537	0.0682332	-0.00581025
ACRC_-_70798671.23-P1P2	156	161	160	174	-0.0171425	-0.00449316	-0.0108178
ACRC_-_70798717.23-P1P2	270	526	260	400	0.00577278	0.168575	0.0871738
ACRC_-_70798728.23-P1P2	157	106	88	132	0.202433	-0.0742703	0.0640814
ACRC_-_70798784.23-P1P2	513	657	393	700	0.0888916	0.00252563	0.0457086
ACRC_-_70798787.23-P1P2	281	323	246	370	0.0403985	-0.03315	0.00362425
ACRV1_+_125550253.23-P1P2	1110	1033	909	1093	0.0646543	0.00594147	0.0352979
ACRV1_+_125550289.23-P1P2	198	160	181	184	0.0246803	-0.0350758	-0.00519776
ACRV1_+_125550420.23-P1P2	535	530	424	534	0.0765604	0.030039	0.0532997
ACRV1_+_125550697.23-P1P2	559	645	497	562	0.034779	0.101567	0.0681729
ACRV1_-_125550304.23-P1P2	202	233	245	241	-0.0780746	0.0171189	-0.0304779
ACRV1_-_125550308.23-P1P2	652	595	673	756	-0.0194621	-0.0841757	-0.0518189
ACRV1_-_125550324.23-P1P2	808	854	829	815	-0.0172662	0.0567569	0.0197454
ACRV1_-_125550488.23-P1P2	370	385	411	622	-0.0461317	-0.202455	-0.124294
ACRV1_-_125550545.23-P1P2	437	502	519	667	-0.070436	-0.10619	-0.0883132
ACRV1_-_125550695.23-P1P2	412	487	500	509	-0.0782906	0.0119856	-0.0331525
ACR_+_51176655.23-P1P2	398	520	587	534	-0.149149	0.0206599	-0.0642446
ACR_+_51176910.23-P1P2	350	587	429	494	-0.0819024	0.118673	0.0183852
ACR_+_51177042.23-P1P2	312	328	350	373	-0.0497075	-0.0295625	-0.039635
ACR_+_51177061.23-P1P2	184	212	225	219	-0.0810451	0.0177458	-0.0316497
ACR_+_51177099.23-P1P2	571	637	615	792	-0.0349183	-0.0734967	-0.0542075
ACR_-_51176666.23-P1P2	345	360	280	413	0.0679193	-0.0338851	0.0170171
ACR_-_51176714.23-P1P2	387	402	480	476	-0.0862042	-0.0494554	-0.0678298
ACR_-_51176829.23-P1P2	933	1012	1008	1175	-0.0360394	-0.0397917	-0.0379156
ACR_-_51177047.23-P1P2	163	193	153	186	0.0150656	0.0519317	0.0334987
ACR_-_51177126.23-P1P2	175	228	146	232	0.0578984	0.0251777	0.0415381
ACSBG1_+_78526451.23-P1P2	400	454	439	481	-0.0417508	0.00529592	-0.0182275
ACSBG1_+_78526472.23-P1P2	242	350	252	315	-0.0226566	0.0856194	0.0314814
ACSBG1_+_78526497.23-P1P2	146	138	70	145	0.259197	0.00937782	0.134287
ACSBG1_+_78526814.23-P1P2	566	562	535	684	0.0125273	-0.0629913	-0.025232
ACSBG1_+_78526826.23-P1P2	903	714	769	953	0.0504314	-0.108427	-0.0289977
ACSBG1_+_78526846.23-P1P2	278	312	236	356	0.0515789	-0.0312183	0.0101803
ACSBG1_+_78526895.23-P1P2	171	152	220	178	-0.0995055	-0.0440083	-0.0717569
ACSBG1_-_78526407.23-P1P2	327	267	354	329	-0.0367729	-0.0690738	-0.0529234
[truncated: 207,072+ more rows]

## Sheet: Gene-level rho values
	rho	rho	rho	rho	rho	rho	rho	rho	rho	rho	rho	rho	rho	rho	rho
	Rep1	Rep1	Rep1	Rep1	Rep1	Rep2	Rep2	Rep2	Rep2	Rep2	ave_Rep1_Rep2	ave_Rep1_Rep2	ave_Rep1_Rep2	ave_Rep1_Rep2	ave_Rep1_Rep2
gene	transcripts	Mann-Whitney p-value	average phenotype of strongest 3	sgRNA count_MW	sgRNA count_avg	transcripts	Mann-Whitney p-value	average phenotype of strongest 3	sgRNA count_MW	sgRNA count_avg	transcripts	Mann-Whitney p-value	average phenotype of strongest 3	sgRNA count_MW	sgRNA count_avg
A1BG	P1	0.2836	-0.139574	9	9	P1	0.327982	-0.0415347	10	10	P1	0.160927	-0.104618	9	9
A1CF	P1P2	0.342414	-0.0347806	10	10	P1P2	0.0514678	-0.172491	10	10	P1P2	0.0429591	-0.107369	10	10
A2M	P1P2	0.792158	0.036624	9	9	P1P2	0.54153	0.0289978	9	9	P1P2	0.668927	0.00967729	9	9
A2ML1	P1P2	0.640223	-0.0450144	10	10	P1P2	0.462787	-0.0260859	10	10	P1P2	0.306822	-0.0577805	10	10
A3GALT2	ENST00000442999.3	0.340763	-0.0512394	10	10	ENST00000442999.3	0.946227	-0.0504724	10	10	ENST00000442999.3	0.627721	-0.0810921	10	10
A4GALT	P1P2	0.471277	-0.0550713	9	9	P1P2	0.83713	-0.025735	9	9	P1P2	0.461832	-0.0236332	9	9
A4GNT	P1P2	0.835019	0.039447	10	10	P1P2	0.506579	0.0279761	10	10	P1P2	0.55645	0.0309167	10	10
AAAS	P1P2	0.152223	0.0251331	10	10	P1P2	0.0883942	0.18409	10	10	P1P2	0.0233935	0.101165	10	10
AACS	P1P2	0.458521	0.00984616	9	9	P1P2	0.32925	0.00877438	9	9	P1P2	0.359728	0.0186115	9	9
AADAC	P1P2	0.443079	-0.0569812	10	10	P1P2	0.873213	0.0236504	10	10	P1P2	0.547135	-0.0166625	10	10
AADACL2	P1P2	0.737666	0.0253911	10	10	P1P2	0.857496	0.0227756	10	10	P1P2	0.966534	-0.0161688	10	10
AADACL3	P1P2	0.153553	0.100627	9	9	P1P2	0.835194	-0.0602715	9	9	P1P2	0.483413	0.0133022	9	9
AADACL4	P1P2	0.592795	-0.0399548	10	10	P1P2	0.479151	0.0609402	10	10	P1P2	0.687092	-0.0301993	10	10
AADAT	P1P2	0.719104	0.122674	9	9	P1P2	0.18627	0.184536	9	9	P1P2	0.32372	0.141654	9	9
AAED1	P1P2	0.721778	-0.0215523	10	10	P1P2	0.671942	0.00788191	10	10	P1P2	0.849842	-0.0265416	10	10
AAGAB	P1P2	0.462372	-0.0404015	8	8	P1P2	0.73197	0.143793	9	9	P1P2	0.30017	0.00730205	8	8
AAK1	P1P2	0.41547	0.0567995	10	10	P1P2	0.593963	0.122568	10	10	P1P2	0.772169	0.0486644	10	10
AAMDC	P1P2	0.177592	-0.105203	10	10	P1P2	0.581714	0.0806703	10	10	P1P2	0.879686	-0.097234	10	10
AAMP	P1P2	0.281213	0.0916827	7	7	P1P2	0.519098	0.354701	9	9	P1P2	0.263325	0.113876	7	7
AANAT	P1P2	0.266265	-0.0283325	10	10	P1P2	0.437491	-0.115909	10	10	P1P2	0.909937	-0.0263254	10	10
AAR2	P1P2	0.681471	0.102005	9	9	P1P2	0.586624	-0.0146843	9	9	P1P2	0.120812	0.0188346	9	9
AARD	P1P2	0.157844	0.202386	10	10	P1P2	0.687553	0.0587345	10	10	P1P2	0.0626565	0.0941407	10	10
AARS	P1P2	0.168416	-0.101417	1	1	P1P2	0.640136	-0.0698218	3	3	P1P2	0.278235	-0.0566233	1	1
AARS2	P1P2	0.970199	0.07225	8	8	P1P2	0.700791	0.0828486	7	7	P1P2	0.815264	-0.0559981	7	7
AARSD1	P2	0.202924	-0.128925	10	10	P1	0.1022	-0.0593817	10	10	P1	0.306822	-0.0704823	10	10
AASDH	P1P2	0.54204	0.0121864	10	10	P1P2	0.0208684	0.225617	10	10	P1P2	0.0633286	0.137339	10	10
AASDHPPT	P1P2	0.715527	0.0381132	7	7	P1P2	0.0756231	0.124421	9	9	P1P2	0.36109	0.0134465	7	7
AASS	P1P2	0.00701836	-0.131717	10	10	P1P2	0.444111	0.0784802	10	10	P1P2	0.486954	-0.0569009	10	10
AATF	P1P2	0.266561	0.107424	8	8	P1P2	0.174924	-0.184239	9	9	P1P2	0.583491	-0.0240509	8	8
AATK	ENST00000326724.4	0.185858	-0.0450353	10	10	ENST00000326724.4	0.945993	0.0242885	10	10	ENST00000326724.4	0.394865	-0.0258728	10	10
ABAT	P2	0.75346	0.0211623	8	8	P1	0.0316565	0.167445	10	10	P1	0.154196	0.107313	10	10
ABCA1	P1P2	0.839586	0.0454171	9	9	P1P2	0.79097	0.0894054	9	9	P1P2	0.70317	0.106552	9	9
ABCA10	P1P2	0.943908	0.0439533	10	10	P1P2	0.3678	-0.0771078	10	10	P1P2	0.699348	-0.107291	10	10
ABCA12	P1P2	0.395283	-0.110994	10	10	P1P2	0.933133	0.0245554	10	10	P1P2	0.588932	-0.0210317	10	10
ABCA13	P1P2	0.507366	0.110027	10	10	P1P2	0.438706	-0.101768	10	10	P1P2	0.592002	0.027702	10	10
ABCA2	P1P2	0.180749	-0.0932573	10	10	P1P2	0.563616	0.0227286	10	10	P1P2	0.474409	-0.00958128	10	10
ABCA3	P1P2	0.185907	0.115672	10	10	P1P2	0.984525	0.121523	10	10	P1P2	0.282248	0.0894696	10	10
ABCA4	P1P2	0.622355	-0.0192764	10	10	P1P2	0.108777	0.167965	10	10	P1P2	0.306542	0.08399	10	10
ABCA5	P1P2	0.504814	-0.13524	10	10	P1P2	0.0213807	0.225869	9	9	P1P2	0.0517464	0.0633454	9	9
ABCA6	P1P2	0.565895	-0.0981706	10	10	P1P2	0.507802	0.00696137	10	10	P1P2	0.895848	-0.0265814	10	10
ABCA7	P1	0.182295	-0.0286892	10	10	P1	0.270947	0.0154921	10	10	P1	0.895848	-0.0237131	10	10
ABCA8	P1P2	0.131707	-0.110612	10	10	P1P2	0.312249	0.0655893	10	10	P1P2	0.906647	0.0162282	10	10
ABCA9	P1P2	0.0265084	-0.1055	10	10	P1P2	0.252955	-0.180112	10	10	P1P2	0.0293183	-0.125935	10	10
ABCB1	ENST00000265724.3	0.00717564	-0.2077	10	10	ENST00000265724.3	0.452643	0.115446	10	10	ENST00000265724.3	0.143598	-0.110561	10	10
ABCB10	P1P2	0.895487	0.0481916	9	9	P1P2	0.297733	0.033809	9	9	P1P2	0.280006	0.0668768	9	9
ABCB11	P1P2	0.201981	-0.084319	10	10	P1P2	0.224344	0.134624	10	10	P1P2	0.709475	0.0574713	10	10
ABCB4	P1P2	0.287254	-0.0985316	9	9	P1P2	0.311302	-0.146964	9	9	P1P2	0.189754	-0.128928	9	9
ABCB5	P1P2	0.0997835	0.0164968	10	10	P1P2	0.497221	0.000973062	10	10	P1P2	0.183719	-0.0377166	10	10
ABCB6	P1P2	0.397093	0.109765	10	10	P1P2	0.699486	0.0919209	10	10	P1P2	0.430889	0.111447	10	10
ABCB7	P1P2	0.101385	0.117405	2	2	P1P2	0.241362	-0.189917	3	3	P1P2	0.106579	0.139942	1	1
ABCB8	P1P2	0.059142	-0.129032	10	10	P1P2	0.119229	0.200076	10	10	P1P2	0.119656	-0.00485489	10	10
ABCB9	P2	0.676151	-0.0571609	10	10	P2	0.0154091	-0.201351	10	10	P2	0.0902473	-0.158538	10	10
ABCC1	P1P2	0.741907	-0.030854	10	10	P1P2	0.0074095	0.14197	10	10	P1P2	0.0975132	0.0977984	10	10
ABCC10	P1P2	0.999292	0.168085	10	10	P1P2	0.779086	-0.091825	10	10	P1P2	0.780348	-0.0165033	10	10
ABCC11	P2	0.052067	0.13123	9	9	P2	0.465927	0.104068	10	10	P2	0.151885	0.129825	9	9
ABCC12	ENST00000311303.3	0.177639	0.0822017	10	10	ENST00000311303.3	0.617585	-0.0880732	9	9	ENST00000311303.3	0.77008	-0.00313938	9	9
ABCC2	P1P2	0.599914	-0.0576011	9	9	P1P2	0.0890752	0.142891	9	9	P1P2	0.151171	0.0959029	9	9
ABCC3	P1P2	0.652683	0.0159158	9	9	P1P2	0.904316	-0.0426123	9	9	P1P2	0.975312	0.01505	9	9
ABCC4	P1P2	0.044138	0.0495105	10	10	P1P2	0.0129847	0.178764	10	10	P1P2	0.00341627	0.125898	10	10
ABCC5	P1P2	0.134571	0.119426	10	10	P1P2	0.791965	-0.0298347	10	10	P1P2	0.34475	0.0155143	10	10
ABCC6	ENST00000205557.7	0.186199	0.108187	9	9	ENST00000205557.7	0.53888	-0.0473108	10	10	ENST00000205557.7	0.917841	0.114338	9	9
ABCC8	P1P2	0.571308	-0.174153	10	10	P1P2	0.863384	0.037509	10	10	P1P2	0.872908	-0.0566834	10	10
ABCC9	P1P2	0.459327	0.0812736	10	10	P1P2	0.934302	-0.00851209	10	10	P1P2	0.790607	0.0575338	10	10
ABCD1	P1P2	0.789051	-0.0368036	10	10	P1P2	0.240606	0.0899025	10	10	P1P2	0.364477	0.0279806	10	10
ABCD2	P1P2	0.591812	-0.0266684	9	9	P1P2	0.734535	-0.0480731	9	9	P1P2	0.944676	-0.0206825	9	9
ABCD3	P1P2	0.724215	0.0939131	10	10	P1P2	0.226312	0.0443646	10	10	P1P2	0.537116	0.0488853	10	10
ABCD4	P1P2	0.160031	0.113533	10	10	P1P2	0.585245	-0.0521599	10	10	P1P2	0.64997	0.0181029	10	10
ABCE1	P1P2	0.0983846	-0.173575	2	2	P1P2	0.680852	0.305718	6	6	P1P2	0.271276	-0.116016	2	2
ABCF1	P1	0.080933	-0.257673	9	9	P1	0.241923	-0.120014	9	9	P1	0.179716	-0.22566	9	9
ABCF2	P1P2	0.0122044	-0.163373	10	10	P1P2	0.994255	-0.0760627	10	10	P1P2	0.197272	-0.137995	10	10
ABCF3	P1P2	0.571107	-0.149144	10	10	P1P2	0.361735	-0.26915	10	10	P1P2	0.15411	-0.152656	10	10
ABCG1	P1P2	0.112695	-0.0569361	9	9	P1P2	0.553805	0.0637356	9	9	P1P2	0.592978	-0.0319586	9	9
ABCG2	P1P2	0.167625	-0.0253154	9	9	P1P2	0.903089	-0.0541817	9	9	P1P2	0.619178	0.0554471	9	9
ABCG4	P1P2	0.428278	0.0882514	8	8	P1P2	0.419465	-0.179679	8	8	P1P2	0.839315	-0.0231546	8	8
ABCG5	P1P2	0.452272	0.117366	10	10	P1P2	0.356653	0.0109422	10	10	P1P2	0.23148	0.031069	10	10
ABCG8	P1P2	0.520807	0.0409628	10	10	P1P2	0.203494	0.116123	9	9	P1P2	0.136772	0.0525667	9	9
ABHD1	P1P2	0.295389	0.0606701	10	10	P1P2	0.241432	-0.0185273	10	10	P1P2	0.912053	0.0589078	10	10
ABHD10	P1P2	0.684216	-0.062083	9	9	P1P2	0.768174	-0.0225023	10	10	P1P2	0.59796	-0.0378302	9	9
ABHD11	P1P2	0.167577	0.169792	9	9	P1P2	0.53315	0.016691	9	9	P1P2	0.287589	0.11913	9	9
ABHD12	P1P2	0.734769	0.0267251	10	10	P1P2	0.3282	0.246296	10	10	P1P2	0.346874	0.0774866	10	10
ABHD12B	P1P2	0.223736	0.106626	10	10	P1P2	0.756303	-0.0671577	10	10	P1P2	0.70793	0.109604	10	10
ABHD13	P1P2	0.666109	0.0492922	9	9	P1P2	0.78857	-0.0805235	10	10	P1P2	0.978304	0.0572145	9	9
ABHD14A	P1P2	0.758439	0.00112366	7	7	P1P2	0.62816	0.299042	10	10	P1P2	0.439376	-0.0170783	7	7
ABHD14B	P1	0.452272	-0.015011	10	10	P2	0.865002	0.116983	10	10	P1	0.792206	0.00665066	10	10
ABHD15	P1P2	0.852137	-0.112556	10	10	P1P2	0.925893	0.117716	10	10	P1P2	0.86474	-0.0128222	10	10
ABHD16A	P1P2	0.0385647	-0.16372	9	9	P1P2	0.410665	-0.0298228	10	10	P1P2	0.172034	-0.104448	9	9
ABHD16B	P1P2	0.452967	0.107743	9	9	P1P2	0.0751144	0.221614	9	9	P1P2	0.032559	0.141586	9	9
ABHD17A	P1P2	0.842528	0.0413949	10	10	P1P2	0.518595	-0.0363915	10	10	P1P2	0.620168	-0.0245252	10	10
ABHD17B	P1P2	0.586428	-0.0403346	8	8	P1P2	0.671573	-0.0556857	9	9	P1P2	0.916153	0.0383258	8	8
ABHD17C	P1P2	0.887859	-0.0548217	10	10	P1P2	0.377888	-0.0245801	10	10	P1P2	0.426047	-0.0408292	10	10
ABHD2	P1P2	0.3351	0.139047	10	10	P1P2	0.977844	0.101413	10	10	P1P2	0.391907	0.113583	10	10
ABHD3	P1P2	0.0299645	0.2006	9	9	P1P2	0.795388	-0.0557959	9	9	P1P2	0.0592736	0.0448887	9	9
ABHD4	P1P2	0.0282995	0.0279312	10	10	P1P2	0.784953	0.0733207	10	10	P1P2	0.130524	0.0431483	10	10
ABHD5	P1P2	0.0591818	0.0461996	10	10	P1P2	0.796612	0.0748089	10	10	P1P2	0.36338	0.0518905	10	10
ABHD6	P1P2	0.962392	-0.092822	10	10	P1P2	0.122966	-0.122419	10	10	P1P2	0.147785	-0.0561669	10	10
ABHD8	P1P2	0.331407	0.160463	10	10	P1P2	0.63642	-0.0375252	10	10	P1P2	0.432973	0.0182412	10	10
ABI1	P1P2	0.351202	-0.0207243	10	10	P1P2	0.764697	-0.0522306	10	10	P1P2	0.372053	-0.0286653	10	10
ABI2	P1P2	0.38686	0.0349517	9	9	P1P2	0.575785	0.229928	10	10	P1P2	0.332221	0.139883	9	9
ABI3	P1P2	0.250331	-0.0812571	10	10	P1P2	0.98054	0.0458969	10	10	P1P2	0.467476	-0.0172531	10	10
ABI3BP	P1P2	0.431998	0.0207691	10	10	P1P2	0.447179	0.176416	10	10	P1P2	0.445603	0.0807162	10	10
ABL1	ENST00000372348.2	0.593102	-0.0369444	10	10	ENST00000372348.2	0.207027	0.0858758	10	10	ENST00000372348.2	0.452888	0.0670368	10	10
ABL2	P1	0.50255	-0.121645	10	10	P1	0.242674	0.1397	10	10	P2	0.578548	0.0118832	10	10
ABLIM1	ENST00000277895.5	0.400729	0.0321768	10	10	ENST00000277895.5	0.684528	-0.0113679	10	10	ENST00000277895.5	0.571674	0.00741434	10	10
ABLIM2	P1P2	0.0400456	-0.128291	10	10	P1P2	0.805926	0.0139059	10	10	P1P2	0.192979	-0.0824223	10	10
ABLIM3	P1P2	0.349076	-0.0239254	9	9	P1P2	0.0637243	-0.087098	10	10	P1P2	0.113862	-0.052874	9	9
ABO	P2	0.369834	-0.0821933	10	10	P1	0.53423	-0.0601067	10	10	P2	0.228144	-0.0406539	10	10
ABR	P1P2	0.0776799	0.132907	9	9	P1P2	0.746268	-0.00634164	10	10	P1P2	0.285187	0.152004	9	9
ABRA	P1P2	0.163219	0.16289	10	10	P1P2	0.923675	-0.132728	10	10	P1P2	0.535943	0.0472338	10	10
ABRACL	P1P2	0.953676	-0.0335092	10	10	P1P2	0.205549	-0.0496401	10	10	P1P2	0.422094	-0.0952304	10	10
ABT1	P1P2	0.89183	0.0507673	10	10	P1P2	0.0795249	0.284059	10	10	P1P2	0.027207	0.116306	10	10
ABTB1	P1P2	0.512873	-0.072924	10	10	P1P2	0.158006	0.175892	10	10	P1P2	0.822979	0.0719905	10	10
ABTB2	P1P2	0.333915	0.0499023	10	10	P1P2	0.178166	0.116908	10	10	P1P2	0.0864815	0.0703354	10	10
ACAA1	P1P2	0.20469	0.0711871	9	9	P1P2	0.27992	0.0571871	9	9	P1P2	0.0940867	0.0640157	9	9
ACAA2	P1P2	0.420142	0.0654323	10	10	P1P2	0.7271	0.150233	10	10	P1P2	0.385705	0.0718678	10	10
ACACA	P1P2	0.0120269	0.278571	10	10	P1P2	0.533554	0.227272	10	10	P1P2	0.00698052	0.209033	10	10
ACACB	P1	0.168366	0.0446157	10	10	P1	0.551376	-0.0490729	10	10	P2	0.396349	0.0944333	10	10
ACAD10	P1P2	0.510971	-0.0485451	10	10	P1P2	0.474418	-0.19882	10	10	P1P2	0.35222	-0.0780191	10	10
ACAD11	P1P2	0.0310138	0.0314436	10	10	P1P2	0.0257879	0.0466945	10	10	P1P2	0.062824	0.159657	10	10
ACAD8	P1P2	0.613503	0.00540197	10	10	P1P2	0.97468	-0.0574527	10	10	P1P2	0.783992	-0.0263102	10	10
ACAD9	P1P2	0.0085482	0.161622	5	5	P1P2	2.04e-05	0.423826	7	7	P1P2	0.00019092	0.225933	5	5
ACADL	P1P2	0.011316	0.133235	10	10	P1P2	0.587571	0.0746083	10	10	P1P2	0.331149	0.0695036	10	10
ACADM	P1P2	0.875845	-0.0668952	10	10	P1P2	0.722802	-0.0274289	10	10	P1P2	0.680994	0.023758	10	10
ACADS	P1P2	0.273256	0.0965831	10	10	P1P2	0.889561	-0.0417131	10	10	P1P2	0.4993	0.0075764	10	10
ACADSB	P1P2	0.920876	0.0099546	10	10	P1P2	0.438272	0.0357363	10	10	P1P2	0.456646	0.0370014	10	10
ACADVL	P1P2	0.2331	-0.0247794	10	10	P1P2	0.44062	-0.100452	10	10	P1P2	0.188556	-0.0406429	10	10
ACAN	P1P2	0.87278	-0.113171	7	7	P1P2	0.860038	0.00873074	8	8	P1P2	0.834587	0.0305586	7	7
ACAP1	P1P2	0.00134006	0.144032	10	10	P1P2	0.735611	-0.0156835	10	10	P1P2	0.0393717	0.0247902	10	10
ACAP2	P1P2	0.17551	-0.0720945	10	10	P1P2	0.870089	-0.072606	10	10	P1P2	0.491611	-0.0804802	10	10
ACAP3	P1P2	0.433889	-0.0651581	8	8	P1P2	0.303301	0.0251721	9	9	P1P2	0.603452	-0.0756803	8	8
ACAT1	P1P2	0.842875	0.0365407	10	10	P1P2	0.979016	0.0324469	10	10	P1P2	0.977646	0.0653792	10	10
ACAT2	P1P2	0.00324616	-0.495615	10	10	P1P2	0.0598562	-0.272859	9	9	P1P2	0.00569499	-0.215738	9	9
ACBD3	P1P2	0.257342	-0.130642	10	10	P1P2	0.0795249	0.0714439	10	10	P1P2	0.455391	0.00399794	10	10
ACBD4	P1	0.137522	-0.127274	10	10	P1	0.504231	0.0803601	10	10	P1	0.311477	-0.111157	10	10
ACBD5	P1P2	0.91404	-0.0254366	8	8	P1P2	0.308939	0.104056	9	9	P1P2	0.742325	0.0288584	8	8
ACBD6	P1P2	0.486175	-0.0344695	9	9	P1P2	0.807208	-0.11534	8	8	P1P2	0.922733	-0.115702	8	8
ACBD7	P1P2	0.747276	-0.156031	10	10	P1P2	0.514036	0.0424933	10	10	P1P2	0.906882	-0.0243798	10	10
ACCS	P1P2	0.234144	-0.082277	10	10	P1P2	0.507708	0.0445837	10	10	P1P2	0.847519	0.00620089	10	10
ACCSL	ENST00000378832.1	0.874563	0.0102004	10	10	ENST00000378832.1	0.146972	0.0528743	10	10	ENST00000378832.1	0.382466	0.0679406	10	10
ACD	P1P2	0.514493	-0.0441453	10	10	P1P2	0.409496	0.299416	10	10	P1P2	0.34158	0.0654255	10	10
ACE	P1	0.725435	0.0106638	10	10	P2	0.0722191	-0.110082	9	9	P2	0.250267	-0.0237772	9	9
ACE2	P1P2	0.785441	-0.0327116	9	9	P1P2	0.826013	0.0160168	9	9	P1P2	0.911145	0.0103027	9	9
ACER1	P1P2	0.787118	-0.0463069	10	10	P1P2	0.398406	0.111482	10	10	P1P2	0.61453	0.0616414	10	10
ACER2	P1P2	0.568498	0.0534011	10	10	P1P2	0.164153	0.154605	10	10	P1P2	0.155055	0.0987966	10	10
ACER3	P1P2	0.080075	0.189166	8	8	P1P2	0.814598	0.0392783	8	8	P1P2	0.190769	0.106713	8	8
ACHE	P2	0.485492	0.0666667	9	9	P1	0.294011	-0.0560411	9	9	P2	0.166602	0.0895208	9	9
ACIN1	P1	0.00341756	-0.13643	10	10	P2	0.205129	-0.0834571	10	10	P1	0.012724	-0.101858	10	10
ACKR2	P1P2	0.873049	-0.0558378	10	10	P1P2	0.99191	0.0353934	10	10	P1P2	0.630457	0.0118365	10	10
ACKR3	P1	0.0720093	0.148482	9	9	P1	0.6546	-0.0594174	9	9	P1	0.547352	0.102443	9	9
ACKR4	P1P2	0.505286	0.15291	10	10	P1P2	0.499459	0.0264729	10	10	P1P2	0.321793	0.0819935	10	10
ACLY	P1P2	0.631788	0.0950388	10	10	P1P2	0.952428	-0.0577775	10	10	P1P2	0.907117	0.0718656	10	10
ACMSD	P1P2	0.931797	0.0325075	10	10	P1P2	0.535778	0.0249286	10	10	P1P2	0.734121	0.0328421	10	10
ACN9	P1P2	0.442025	0.0402141	10	10	P1P2	0.694812	0.056166	10	10	P1P2	0.900072	-0.0289663	10	10
ACO1	P1P2	0.107983	0.111141	10	10	P1P2	0.994255	-0.0755919	10	10	P1P2	0.561436	0.0420995	10	10
ACO2	P1P2	0.648068	-0.0552664	10	10	P1P2	0.349492	0.0788704	10	10	P1P2	0.791749	0.0178026	10	10
ACOT1	P1P2	0.275768	0.132167	9	9	P1P2	0.823491	0.00235141	10	10	P1P2	0.475257	0.102568	9	9
ACOT11	P1	0.464018	-0.167456	9	9	P1	0.271908	0.155598	10	10	P2	0.504398	0.095805	10	10
ACOT12	P1P2	0.90259	0.00843155	10	10	P1P2	0.707993	0.0779643	10	10	P1P2	0.615781	0.0171258	10	10
ACOT13	P1P2	0.258117	0.123593	8	8	P1P2	0.0439213	0.155253	8	8	P1P2	0.0104349	0.0917128	8	8
ACOT2	P1P2	0.763341	0.0257554	10	10	P1P2	0.924725	-0.0548972	10	10	P1P2	0.819059	-0.0301772	10	10
ACOT4	P1P2	0.136171	0.125935	9	9	P1P2	0.226594	0.098996	10	10	P1P2	0.188805	0.122568	9	9
ACOT6	P1P2	0.941085	-0.0375559	10	10	P1P2	0.366541	-0.052396	9	9	P1P2	0.246424	-0.0420711	9	9
ACOT7	P1P2	0.954854	-0.182438	10	10	P1P2	0.498727	0.176739	9	9	P1P2	0.405876	0.119446	9	9
ACOT8	P1P2	0.918412	-0.0156047	10	10	P1P2	0.856662	-0.0209155	9	9	P1P2	0.814642	0.0299413	9	9
ACOT9	P1P2	0.920054	-0.00712783	10	10	P1P2	0.552147	-0.0320798	9	9	P1P2	0.318233	0.0131763	9	9
ACOX1	P1P2	0.947673	0.0345091	10	10	P1P2	0.831506	-0.0506956	10	10	P1P2	0.926882	-0.0350956	10	10
ACOX2	P2	0.520423	-0.0976281	10	10	P2	0.797065	0.0501721	10	10	P1	0.611484	-0.0863564	9	9
ACOX3	P1	0.365746	-0.0250824	10	10	P1	0.465657	0.225672	10	10	P1	0.662396	0.100709	10	10
ACOXL	P1P2	0.440534	0.0600872	10	10	P1P2	0.911663	-0.0509785	10	10	P1P2	0.554859	0.0273228	10	10
ACP1	P1P2	0.0501379	0.147635	9	9	P1P2	0.00553488	0.219991	9	9	P1P2	0.00148091	0.156523	9	9
ACP2	P1P2	0.345202	0.0296174	10	10	P1P2	0.446477	0.0313038	10	10	P1P2	0.201216	-0.0114131	10	10
ACP5	P1	0.259955	0.0382389	9	9	P2	0.136267	0.0895877	10	10	P2	0.139582	0.113222	10	10
ACP6	P1P2	0.527254	-0.0382647	9	9	P1P2	0.490115	-0.0459767	9	9	P1P2	0.348204	-0.0636563	9	9
ACPL2	P1P2	0.448569	-0.202645	9	9	P1P2	0.277171	-0.118776	9	9	P1P2	0.0369875	-0.102138	9	9
ACPP	P1P2	0.700635	0.0138154	10	10	P1P2	0.584538	-0.0471833	10	10	P1P2	0.691897	0.0263034	10	10
ACPT	ENST00000270593.1	0.590855	-0.0113716	10	10	ENST00000270593.1	0.430498	-0.0152426	10	10	ENST00000270593.1	0.707269	0.0407156	10	10
ACR	P1P2	0.107886	-0.105752	10	10	P1P2	0.916326	0.0323692	10	10	P1P2	0.25568	-0.062094	10	10
ACRBP	P1P2	0.176927	0.00547612	10	10	P1P2	0.0966203	0.1583	10	10	P1P2	0.0614944	0.10182	10	10
ACRC	P1P2	0.661728	-0.0142731	10	10	P1P2	0.773456	0.084913	10	10	P1P2	0.799069	0.0375578	10	10
ACRV1	P1P2	0.593102	-0.0266016	10	10	P1P2	0.605609	-0.0690263	10	10	P1P2	0.470024	-0.0481446	10	10
ACSBG1	P1P2	0.735326	0.0704234	10	10	P1P2	0.266369	-0.059715	10	10	P1P2	0.518702	0.00102944	10	10
ACSBG2	P1P2	0.171632	-0.117857	10	10	P1P2	0.316631	0.0916069	10	10	P1P2	0.533407	-0.0711349	10	10
ACSF2	P1P2	0.671725	0.120736	10	10	P1P2	0.534984	-0.0372667	9	9	P1P2	0.225788	-0.0430498	9	9
ACSF3	P1P2	0.058127	0.175035	9	9	P1P2	0.135349	0.0310323	9	9	P1P2	0.0577736	0.062928	9	9
ACSL1	P1P2	0.771469	-0.0108678	10	10	P1P2	0.478421	-0.00441494	10	10	P1P2	0.506293	-0.00494251	10	10
ACSL3	P1P2	0.174147	0.130027	10	10	P1P2	0.0293433	0.454577	10	10	P1P2	0.00481225	0.24076	10	10
ACSL4	P1P2	0.814879	-0.052498	10	10	P1P2	0.623268	-0.00289171	10	10	P1P2	0.429849	-0.0431585	10	10
ACSL5	P1	0.792809	-0.040151	10	10	P2	0.39236	-0.0183977	10	10	P2	0.519663	0.0484815	10	10
ACSL6	P2	0.58373	0.0219465	10	10	P2	0.331116	0.339167	10	10	P2	0.647837	0.182589	10	10
ACSM1	P1P2	0.857124	0.0176725	10	10	P1P2	0.490172	0.0399732	10	10	P1P2	0.713894	0.0456045	10	10
ACSM2A	P1P2	0.946967	-0.0162655	10	10	P1P2	0.223449	0.14056	10	10	P1P2	0.407001	0.0475559	10	10
ACSM2B	P1P2	0.646687	0.0657219	10	10	P1P2	0.415782	0.0310508	10	10	P1P2	0.423295	0.0510407	10	10
ACSM3	P1P2	0.826604	0.0559135	10	10	P1P2	0.556099	-0.266769	10	10	P1P2	0.45396	-0.0549837	10	10
ACSM4	ENST00000399422.4	0.194104	-0.0331415	9	9	ENST00000399422.4	0.844155	0.00721563	9	9	ENST00000399422.4	0.365495	-0.0332244	9	9
ACSM5	P1P2	0.526485	0.0862635	10	10	P1P2	0.312671	0.0783299	10	10	P1P2	0.109313	0.0829169	10	10
ACSS1	P1P2	0.0138001	-0.13014	10	10	P1P2	0.887123	0.141212	10	10	P1P2	0.446311	-0.047389	10	10
ACSS2	P1P2	0.383024	-0.100198	9	9	P1P2	0.632964	0.057432	10	10	P1P2	0.836062	-0.00963871	9	9
ACSS3	P1P2	0.333036	0.107745	9	9	P1P2	0.69947	0.118361	9	9	P1P2	0.942685	0.151207	9	9
ACTA1	P2	0.178449	0.0494378	10	10	P2	0.798881	-0.0889268	10	10	P2	0.479737	-0.0356651	10	10
ACTA2	P1	0.891012	-0.013496	10	10	P1	0.494154	-0.0740371	10	10	P1	0.39668	-0.0279234	10	10
ACTB	P1P2	0.811676	-0.0191161	9	9	P1P2	0.913062	0.0363521	10	10	P1P2	0.428303	-0.0436797	9	9
ACTBL2	P1P2	0.0634822	0.0596996	10	10	P1P2	0.575484	0.075414	10	10	P1P2	0.109116	0.0496054	10	10
ACTC1	P1P2	0.620372	-0.0363943	10	10	P1P2	0.762455	-0.0498661	10	10	P1P2	0.578143	-0.0471021	10	10
ACTG1	P1P2	0.154393	-0.137268	10	10	P1P2	0.0204096	-0.107633	10	10	P1P2	0.00961024	-0.110857	10	10
ACTG2	P1	0.0107469	-0.107008	8	8	P2	0.653706	0.0140579	9	9	P1	0.0836723	-0.137983	8	8
ACTL10	P1P2	0.514302	-0.0389715	10	10	P1P2	0.743488	-0.0564692	10	10	P1P2	0.494042	-0.0776597	10	10
ACTL6A	P1P2	0.966039	-0.0497309	6	6	P1P2	0.335044	0.0727327	6	6	P1P2	0.674518	0.00104656	6	6
ACTL6B	P1P2	0.480534	0.0247263	9	9	P1P2	0.134116	-0.164425	10	10	P1P2	0.251041	-0.0731885	9	9
ACTL7A	P1P2	0.635684	-0.0538228	10	10	P1P2	0.023318	0.123514	10	10	P1P2	0.285311	0.105685	10	10
ACTL7B	P1P2	0.658516	-0.042013	10	10	P1P2	0.101554	0.0902082	10	10	P1P2	0.363224	0.0115934	10	10
ACTL8	P1P2	0.570906	-0.0559852	10	10	P1P2	0.252102	-0.0876755	10	10	P1P2	0.168289	-0.0711149	10	10
ACTL9	P1P2	0.672372	-0.0182917	10	10	P1P2	0.747492	-0.0678438	10	10	P1P2	0.904533	0.0311633	10	10
ACTN1	P1P2	0.308401	0.0789175	10	10	P1P2	0.769634	0.188492	10	10	P1P2	0.99657	0.136882	10	10
ACTN2	P1P2	0.870139	-0.0336779	10	10	P1P2	0.536456	0.0536632	10	10	P1P2	0.885537	-0.0359015	10	10
ACTN3	P1P2	0.409821	0.0287544	10	10	P1P2	0.527391	0.0193082	10	10	P1P2	0.845429	0.0289212	10	10
ACTN4	P1P2	0.883423	-0.000570248	10	10	P1P2	0.733066	0.108815	10	10	P1P2	0.585869	0.0442132	10	10
ACTR10	P1P2	0.926211	0.00897562	7	7	P1P2	0.217651	0.320754	8	8	P1P2	0.634477	0.100756	7	7
ACTR1A	P1P2	0.425016	-0.0924101	10	10	P1P2	0.0534706	0.128212	10	10	P1P2	0.471848	0.0516572	10	10
ACTR1B	P1P2	0.118334	-0.141416	8	8	P1P2	0.869084	-0.0185068	8	8	P1P2	0.352221	-0.109311	8	8
ACTR2	P1P2	0.834096	0.0362471	10	10	P1P2	0.297022	-0.126297	10	10	P1P2	0.26459	-0.0550758	10	10
ACTR3	P1P2	0.768242	-0.0152056	9	9	P1P2	0.191698	0.226231	10	10	P1P2	0.697842	0.0641268	9	9
ACTR3B	P1P2	0.218492	-0.0874758	10	10	P1P2	0.780551	0.0117154	10	10	P1P2	0.626879	-0.133921	10	10
ACTR3C	P1P2	0.304416	0.0471619	10	10	P1P2	0.795024	0.125319	10	10	P1P2	0.581593	0.0856325	10	10
ACTR5	P1P2	0.0106906	-0.271234	9	9	P1P2	0.00175567	-0.226604	9	9	P1P2	0.000154207	-0.215563	9	9
ACTR6	P1P2	0.664538	-0.0582802	4	4	P1P2	0.373782	-0.104381	6	6	P1P2	0.347988	0.0683033	3	3
ACTR8	P1P2	0.0591883	-0.13224	9	9	P1P2	0.0147823	-0.116122	9	9	P1P2	0.0134027	-0.241952	9	9
ACTRT1	P1P2	0.396105	0.188743	10	10	P1P2	0.411836	-0.124811	10	10	P1P2	0.867772	0.0373939	10	10
ACTRT2	P1P2	0.068768	-0.145192	9	9	P1P2	0.0668175	0.152208	9	9	P1P2	0.688843	-0.00164031	9	9
ACTRT3	P1P2	0.365354	-0.115317	10	10	P1P2	0.499925	0.157766	10	10	P1P2	0.998462	0.0557537	10	10
ACVR1	P1P2	0.331702	0.113826	10	10	P1P2	0.371642	0.0914869	10	10	P1P2	0.208202	0.0996211	10	10
ACVR1B	P1P2	0.203711	0.13804	10	10	P1P2	0.442975	0.0317478	10	10	P1P2	0.0680678	0.0928708	10	10
ACVR1C	P1P2	0.278795	0.0328842	10	10	P1P2	0.247386	0.0252707	10	10	P1P2	0.129247	0.0558733	10	10
ACVR2A	P1P2	0.195935	0.132795	10	10	P1P2	0.21366	-0.0468571	10	10	P1P2	0.879218	-0.00671198	10	10
ACVR2B	P1P2	0.244471	-0.125921	10	10	P1P2	0.955897	0.0498151	9	9	P1P2	0.859322	0.0246765	9	9
ACVRL1	P1P2	0.328002	-0.0789313	9	9	P1P2	0.593251	0.0967803	9	9	P1P2	0.961108	0.00629118	9	9
ACY1	P1P2	0.918368	-0.00228393	8	8	P1P2	0.872253	0.065129	9	9	P1P2	0.755647	-0.00627602	8	8
ACY3	P2	0.683644	0.0454678	9	9	P1	0.243504	0.016779	10	10	P2	0.217866	0.059	9	9
ACYP1	P2	0.177402	0.0554891	10	10	P2	0.222278	-0.157961	10	10	P2	0.878283	-0.0279634	10	10
ACYP2	P1P2	0.9598	0.0821748	10	10	P1P2	0.35719	0.0376123	10	10	P1P2	0.406498	0.0187364	10	10
ADA	P1P2	0.564495	-0.0379506	10	10	P1P2	0.891187	0.033016	10	10	P1P2	0.659603	0.0242053	10	10
ADAD1	P1P2	0.787231	-0.101398	10	10	P1P2	0.0205295	0.232969	10	10	P1P2	0.0951389	0.0674778	10	10
ADAD2	P1P2	0.552704	0.0602956	9	9	P1P2	0.0654886	0.2598	10	10	P1P2	0.164979	0.128842	9	9
ADAL	P1P2	0.857008	0.0646181	10	10	P1P2	0.464042	-0.0475578	10	10	P1P2	0.942915	-0.0439682	10	10
ADAM10	P1P2	0.257422	-0.134024	8	8	P1P2	0.175608	-0.176193	8	8	P1P2	0.16097	-0.152255	8	8
ADAM11	P1P2	0.847735	0.02869	10	10	P1P2	0.992379	0.0941625	10	10	P1P2	0.913229	0.0488818	10	10
ADAM12	P1P2	0.866417	-0.0418218	10	10	P1P2	0.432305	-0.156962	10	10	P1P2	0.936074	-0.0723087	10	10
ADAM15	P1P2	0.291721	0.12194	10	10	P1P2	0.207344	-0.107926	10	10	P1P2	0.950941	-0.00500439	10	10
ADAM17	P1P2	0.955914	0.0377547	10	10	P1P2	0.911897	0.0858124	10	10	P1P2	0.952358	0.0150824	10	10
ADAM18	P1P2	0.929134	-0.0445356	8	8	P1P2	0.443322	-0.117534	8	8	P1P2	0.288718	-0.02404	8	8
ADAM19	P1P2	0.897091	0.0314625	10	10	P1P2	0.239842	0.0672018	10	10	P1P2	0.305141	0.0859477	10	10
ADAM2	P1P2	0.821196	-0.00779016	10	10	P1P2	0.814811	0.0719402	10	10	P1P2	0.790379	0.0241722	10	10
ADAM20	P1P2	0.315545	-0.0377632	10	10	P1P2	0.740822	0.0302432	10	10	P1P2	0.725206	0.0338486	10	10
ADAM21	P1P2	0.88249	-0.0294798	10	10	P1P2	0.917958	0.0223569	10	10	P1P2	0.988999	0.00759923	10	10
ADAM22	P1P2	0.177782	-0.0941261	10	10	P1P2	0.470523	-0.0310868	10	10	P1P2	0.229635	-0.113871	10	10
ADAM23	P1P2	0.728319	0.111216	10	10	P1P2	0.0978354	-0.137358	10	10	P1P2	0.377638	-0.0812498	10	10
ADAM28	P1P2	0.468255	-0.106133	10	10	P1P2	0.682909	0.0168932	10	10	P1P2	0.44702	-0.072718	10	10
ADAM29	P1P2	0.969226	0.0245646	10	10	P1P2	0.0979248	-0.14552	10	10	P1P2	0.203315	-0.0837303	10	10
ADAM30	P1P2	0.280373	0.0735792	10	10	P1P2	0.00368084	0.328114	10	10	P1P2	0.00679624	0.229169	10	10
ADAM32	P1P2	0.768957	-0.0336391	9	9	P1P2	0.0493024	-0.209555	9	9	P1P2	0.115009	-0.137445	9	9
ADAM33	P1P2	0.442288	-0.0226825	10	10	P1P2	0.588381	-0.0872524	10	10	P1P2	0.317755	-0.091197	10	10
ADAM7	P1P2	0.289225	0.264091	10	10	P1P2	0.369052	-0.10526	10	10	P1P2	0.71921	0.0792079	10	10
ADAM8	P1P2	0.453607	-0.0743239	10	10	P1P2	0.389277	-0.0107913	10	10	P1P2	0.782625	-0.0906285	10	10
ADAM9	P1P2	0.892532	-0.000777978	10	10	P1P2	0.415109	-0.125728	10	10	P1P2	0.523709	-0.064873	10	10
ADAMDEC1	P1P2	0.0597008	0.134922	10	10	P1P2	0.66147	0.00289966	10	10	P1P2	0.37237	0.0636296	10	10
ADAMTS1	P2	0.0859907	0.129931	9	9	P2	0.170824	-0.102427	9	9	P1	0.402153	0.0563108	10	10
ADAMTS10	P1P2	0.0941328	-0.0748563	10	10	P1P2	0.70101	-0.0495556	10	10	P1P2	0.265225	-0.0426894	10	10
ADAMTS12	P1P2	0.64945	0.0377961	10	10	P1P2	0.990621	0.015057	10	10	P1P2	0.842181	0.00411402	10	10
ADAMTS13	P1P2	0.551087	0.10976	10	10	P1P2	0.368973	0.130408	10	10	P1P2	0.267521	0.0917426	10	10
ADAMTS14	P1P2	0.728449	-0.00778585	9	9	P1P2	0.58111	0.0354912	10	10	P1P2	0.963599	-0.0234599	9	9
ADAMTS15	P1P2	0.239762	0.0511767	9	9	P1P2	0.967502	-0.022671	9	9	P1P2	0.537408	0.0336518	9	9
ADAMTS16	P1	0.0501672	0.0790448	8	8	P2	0.190302	0.231169	10	10	P1	0.230703	0.0513121	8	8
ADAMTS17	P1P2	0.906689	0.0323829	10	10	P1P2	0.481985	0.0125827	10	10	P1P2	0.493668	-0.000445316	10	10
ADAMTS18	P1P2	0.874796	-0.0241427	10	10	P1P2	0.835749	0.102945	10	10	P1P2	0.741951	0.107964	10	10
ADAMTS19	P1P2	0.116432	0.13964	10	10	P1P2	0.678708	0.0320412	10	10	P1P2	0.275404	0.0621415	10	10
ADAMTS2	P1P2	0.994811	-0.0411109	10	10	P1P2	0.0239154	-0.252576	10	10	P1P2	0.0731423	-0.17737	10	10
ADAMTS20	P1P2	0.963805	-0.0408597	10	10	P1P2	0.36913	0.0509519	10	10	P1P2	0.705286	0.0837752	10	10
ADAMTS3	P1P2	0.404718	0.10315	10	10	P1P2	0.238434	-0.0529924	10	10	P1P2	0.767862	-0.0166838	10	10
ADAMTS4	P1P2	0.501424	-0.0193757	9	9	P1P2	0.830118	-0.0461491	9	9	P1P2	0.705258	-0.0455334	9	9
ADAMTS5	P1P2	0.512873	0.0871251	10	10	P1P2	0.390006	-0.109399	10	10	P1P2	0.894206	-0.0151108	10	10
ADAMTS6	P1P2	0.899431	0.0504256	10	10	P1P2	0.2641	0.108533	10	10	P1P2	0.246377	0.0469566	10	10
ADAMTS7	P1P2	0.561901	0.0469888	10	10	P1P2	0.0296284	0.1771	10	10	P1P2	0.0230157	0.0985502	10	10
ADAMTS8	P1P2	0.663845	-0.043821	9	9	P1P2	0.710963	0.0217278	8	8	P1P2	0.715914	-0.0167047	8	8
ADAMTS9	P1P2	0.510893	-0.0904392	9	9	P1P2	0.613336	0.178932	9	9	P1P2	0.777164	-0.0200014	8	8
ADAMTSL1	P1P2	0.986202	-0.0263479	10	10	P1P2	0.457521	-0.0305697	10	10	P1P2	0.741278	0.0407374	10	10
ADAMTSL2	P1P2	0.564895	-0.0516286	10	10	P1P2	0.696441	0.119921	10	10	P1P2	0.957082	0.0376557	10	10
ADAMTSL3	P1P2	0.198502	-0.0472401	10	10	P1P2	0.158092	0.16333	10	10	P1P2	0.568654	0.0250545	10	10
ADAMTSL4	P1P2	0.0357402	-0.0645459	8	8	P1P2	0.208294	0.195456	8	8	P1P2	0.821989	0.0464198	8	8
ADAMTSL5	P1P2	0.496083	0.0358788	9	9	P1P2	0.221333	0.0420266	10	10	P1P2	0.0955076	0.0478435	9	9
ADAP1	P1P2	0.396337	-0.0353478	8	8	P1P2	0.0345914	-0.0724809	8	8	P1P2	0.0448227	-0.0958353	8	8
ADAP2	P1P2	0.714706	-0.0330133	10	10	P1P2	0.617874	0.231439	10	10	P1P2	0.734121	0.129553	10	10
ADAR	P1	0.2165	-0.124466	9	9	P2	0.209897	0.118756	10	10	P1	0.242749	-0.0585063	9	9
ADARB1	P1P2	0.907274	-0.0668699	10	10	P1P2	0.386209	0.167881	10	10	P1P2	0.568453	0.0435021	10	10
ADARB2	ENST00000381312.1	0.905283	0.105778	10	10	ENST00000381312.1	0.797065	-0.095502	10	10	ENST00000381312.1	0.504587	0.0566803	10	10
ADAT1	P1P2	0.88424	0.121814	10	10	P1P2	0.531431	-0.14816	10	10	P1P2	0.94032	-0.0260691	10	10
ADAT2	P1P2	0.177691	0.205447	8	8	P1P2	0.669767	-0.0296832	9	9	P1P2	0.630532	0.112205	8	8
ADAT3	P2	0.0376311	-0.0829618	10	10	P2	0.186452	0.176016	10	10	P1	0.880154	0.0314867	10	10
ADC	P1P2	0.93885	0.0176405	10	10	P1P2	0.0256903	-0.343943	10	10	P1P2	0.0568687	-0.194604	10	10
ADCK1	P1P2	0.638638	-0.0999523	10	10	P1P2	0.387903	0.000143815	10	10	P1P2	0.690148	-0.00565325	10	10
ADCK2	P1P2	0.573118	-0.0293741	10	10	P1P2	0.0183754	-0.185748	10	10	P1P2	0.0225203	-0.0601996	10	10
ADCK3	P1P2	0.350515	0.0720944	10	10	P1P2	0.757532	0.0513946	10	10	P1P2	0.347787	0.04419	10	10
ADCK4	P1P2	0.334137	-0.182384	10	10	P1P2	0.0209336	-0.0632183	10	10	P1P2	0.0339662	-0.142227	10	10
ADCK5	P1P2	0.041353	-0.0289566	9	9	P1P2	0.177315	0.0254397	10	10	P1P2	0.0184584	-0.105976	9	9
ADCY1	P1P2	0.190272	0.071835	10	10	P1P2	0.319981	0.125142	10	10	P1P2	0.209383	0.148714	10	10
ADCY10	P1P2	0.551186	0.0405061	10	10	P1P2	0.16961	-0.0392168	10	10	P1P2	0.518125	-0.0138714	10	10
ADCY2	P1P2	0.973646	0.0135868	9	9	P1P2	0.0880029	0.116872	9	9	P1P2	0.140184	0.0527368	9	9
ADCY3	P1P2	0.195067	-0.0480753	10	10	P1P2	0.434634	-0.0210527	10	10	P1P2	0.181674	-0.0264872	10	10
ADCY4	P1P2	0.232001	-0.0599546	10	10	P1P2	0.44595	0.169057	10	10	P1P2	0.807096	-0.0205674	10	10
ADCY5	P1P2	0.981014	0.0877257	10	10	P1P2	0.0110055	-0.0976636	10	10	P1P2	0.0761853	-0.107752	10	10
ADCY6	P1P2	0.45539	0.0719112	10	10	P1P2	0.932432	-0.0179646	10	10	P1P2	0.709254	0.0242555	10	10
ADCY7	P1P2	0.999056	0.00518765	10	10	P1P2	0.932315	-0.00795069	10	10	P1P2	0.915581	-0.012914	10	10
ADCY8	P1P2	0.739005	-0.0269438	10	10	P1P2	0.393093	0.0812619	10	10	P1P2	0.486954	0.0513741	10	10
ADCY9	P1P2	0.113866	-0.047599	9	9	P1P2	0.950961	0.0466631	9	9	P1P2	0.312358	-0.0364675	9	9
ADCYAP1	P1P2	0.709638	0.0525251	10	10	P1P2	0.728866	0.0314077	10	10	P1P2	0.700666	0.0384294	10	10
ADCYAP1R1	P1P2	0.195322	-0.177214	10	10	P1P2	0.207079	0.0526526	10	10	P1P2	0.696276	-0.0321944	10	10
ADD1	P1P2	0.244411	-0.11057	10	10	P1P2	0.610028	-0.0784914	10	10	P1P2	0.205748	-0.052003	10	10
ADD2	P1P2	0.904347	0.0230804	10	10	P1P2	0.514036	-0.0291971	10	10	P1P2	0.577535	-0.0172854	10	10
ADD3	P1P2	0.18812	0.0247647	8	8	P1P2	0.676551	0.0634334	9	9	P1P2	0.104308	0.0271667	8	8
ADGB	P1P2	0.900835	-0.0436745	10	10	P1P2	0.333975	0.153557	10	10	P1P2	0.725429	0.0527929	10	10
ADH1A	P1P2	0.394133	-0.113587	10	10	P1P2	0.225411	-0.048934	10	10	P1P2	0.087851	-0.0760469	10	10
ADH1B	P1P2	0.531709	-0.00567591	10	10	P1P2	0.658703	0.0323271	10	10	P1P2	0.894206	0.0291048	10	10
ADH1C	P1P2	0.988207	-0.0365424	10	10	P1P2	0.952545	0.0227918	10	10	P1P2	0.938432	-0.0122754	10	10
ADH4	P1P2	0.316616	0.126919	10	10	P1P2	0.665843	-0.0473671	10	10	P1P2	0.820442	0.0346602	10	10
ADH5	P1P2	0.496447	-0.0105008	10	10	P1P2	0.239079	-0.0726035	10	10	P1P2	0.337383	-0.108042	10	10
ADH6	P1P2	0.371888	0.0814119	10	10	P1P2	0.661576	0.137943	10	10	P1P2	0.613697	0.128341	10	10
ADH7	P1P2	0.509641	0.0328677	10	10	P1P2	0.954886	-0.0590168	10	10	P1P2	0.742175	0.0199056	10	10
ADHFE1	P1P2	0.440125	0.0209982	9	9	P1P2	0.387096	0.0511534	10	10	P1P2	0.54299	0.0221599	9	9
ADI1	P1P2	0.603367	-0.0181597	10	10	P1P2	0.541796	-0.0590558	10	10	P1P2	0.924526	-0.0400309	10	10
ADIG	P1P2	0.381302	0.193893	10	10	P1P2	0.613533	-0.064631	10	10	P1P2	0.446134	0.0234267	10	10
ADIPOQ	P1P2	0.366507	0.214348	9	9	P1P2	0.474472	-0.105294	9	9	P1P2	0.420508	0.00909227	9	9
ADIPOR1	P1P2	0.609253	-0.0680092	10	10	P1P2	0.841489	0.0941463	9	9	P1P2	0.967087	0.0247128	9	9
ADIPOR2	P1P2	0.34846	-0.0135288	10	10	P1P2	0.633906	-0.0663639	10	10	P1P2	0.430022	-0.0489608	10	10
ADIRF	P1P2	0.39877	0.0546137	9	9	P1P2	0.948917	-0.0152103	10	10	P1P2	0.467177	0.0425152	9	9
ADK	P2	0.105002	-0.0617096	10	10	P1	0.402171	-0.039426	8	8	P1	0.0531914	-0.101687	8	8
ADM	P1P2	0.245352	-0.0678001	9	9	P1P2	0.17034	-0.0185023	9	9	P1P2	0.089866	-0.0278112	9	9
ADM2	P1P2	0.0267407	0.100381	10	10	P1P2	0.609514	0.066328	10	10	P1P2	0.34475	0.0842609	10	10
ADM5	P1P2	0.667311	-0.0334671	10	10	P1P2	0.910032	-0.0245866	10	10	P1P2	0.691022	-0.00678319	10	10
ADNP	P1P2	0.00899255	-0.0508624	9	9	P1P2	0.252747	0.0639472	9	9	P1P2	0.0979563	-0.0339926	9	9
ADNP2	P1P2	0.0638634	-0.226189	9	9	P1P2	0.147979	0.0449082	9	9	P1P2	0.627801	-0.124644	9	9
ADO	P1P2	0.0665339	0.127067	10	10	P1P2	0.171453	-0.0530546	9	9	P1P2	0.00544366	-0.0549916	9	9
ADORA1	P1P2	0.698446	0.0208534	10	10	P1P2	0.948215	-0.0242795	10	10	P1P2	0.972208	0.0232297	10	10
ADORA2A	P1P2	0.256412	0.0528379	10	10	P1P2	0.0303965	0.253251	10	10	P1P2	0.0559107	0.155565	10	10
ADORA2B	P1P2	0.183656	-0.0331933	10	10	P1P2	0.190999	-0.155012	10	10	P1P2	0.035055	-0.0744654	10	10
ADORA3	P1	0.537057	0.0257508	10	10	P2	0.185621	0.103929	10	10	P2	0.463127	0.0411027	10	10
ADPGK	P1P2	0.582793	0.0451964	8	8	P1P2	0.811565	0.113213	9	9	P1P2	0.839833	0.0233151	8	8
ADPRH	P1P2	0.557424	-0.0624311	10	10	P1P2	0.106336	-0.170989	10	10	P1P2	0.183231	-0.0917942	10	10
ADPRHL1	P2	0.0265285	-0.160388	10	10	P1	0.210646	0.149819	10	10	P1	0.0533361	0.102495	10	10
ADPRHL2	P1P2	0.920524	0.0778331	10	10	P1P2	0.0891933	0.154806	10	10	P1P2	0.1399	0.106613	10	10
ADPRM	P1P2	0.00476131	0.187536	7	7	P1P2	0.0137751	0.129707	9	9	P1P2	0.00681334	0.246087	7	7
ADRA1A	P1P2	0.662372	0.00152137	10	10	P1P2	0.48043	0.0846633	10	10	P1P2	0.294227	0.0528387	10	10
ADRA1B	P1P2	0.769209	0.021702	10	10	P1P2	0.449554	-0.0999361	10	10	P1P2	0.499865	-0.0381136	10	10
ADRA1D	P1P2	0.34922	0.097575	10	10	P1P2	0.436104	-0.00131741	10	10	P1P2	0.777619	0.037943	10	10
ADRA2A	P1P2	0.468536	-0.0879896	8	8	P1P2	0.998295	-0.0340533	8	8	P1P2	0.508378	-0.0134345	8	8
ADRA2B	P1P2	0.901186	0.000613496	10	10	P1P2	0.709196	0.151468	10	10	P1P2	0.20437	0.0433864	10	10
ADRA2C	P1P2	0.909266	0.00817188	10	10	P1P2	0.34497	-0.0761995	10	10	P1P2	0.226546	-0.0157893	10	10
ADRB1	P1P2	0.301295	-0.0695414	10	10	P1P2	0.424337	0.0510658	10	10	P1P2	0.358548	0.00267143	10	10
ADRB2	P1P2	0.239593	-0.0884415	10	10	P1P2	0.286929	-0.0288747	10	10	P1P2	0.851702	-0.0677412	10	10
ADRB3	P1P2	0.395642	0.0587152	9	9	P1P2	0.080061	0.0388943	9	9	P1P2	0.110611	0.0932335	9	9
ADRBK1	P1P2	0.0380819	0.12871	10	10	P1P2	0.204814	0.188912	10	10	P1P2	0.0401717	0.126037	10	10
ADRBK2	P1P2	0.780757	-0.0275964	10	10	P1P2	0.984057	0.104502	9	9	P1P2	0.854905	0.0670449	9	9
ADRM1	P1P2	0.645519	0.074007	10	10	P1P2	0.4456	0.100195	10	10	P1P2	0.785587	0.180314	10	10
ADSL	P1P2	0.873333	0.0103522	6	6	P1P2	0.190747	-0.160937	9	9	P1P2	0.496741	0.0194905	6	6
ADSS	P1P2	0.270651	0.0754997	9	9	P1P2	0.218992	-0.0460917	9	9	P1P2	0.819013	0.0281418	9	9
ADSSL1	P1P2	0.342063	0.0848357	9	9	P1P2	0.234404	0.132374	9	9	P1P2	0.221506	0.108605	9	9
ADTRP	P1P2	0.527257	-0.040065	10	10	P1P2	0.0718096	0.122631	10	10	P1P2	0.240031	0.00637776	10	10
AEBP1	P1P2	0.406303	-0.121649	10	10	P1P2	0.235869	0.0464476	10	10	P1P2	0.642305	-0.0357605	10	10
AEBP2	P1P2	0.112965	0.232389	10	10	P1P2	0.122396	0.247626	10	10	P1P2	0.00643494	0.163133	10	10
AEN	P1P2	0.181908	0.237596	10	10	P1P2	0.246247	-0.142896	10	10	P1P2	0.565641	-0.0247213	10	10
AES	P1P2	0.310089	0.0292357	10	10	P1P2	0.566497	-0.0196199	10	10	P1P2	0.859846	-0.016591	10	10
AFAP1	P1P2	0.180555	0.0773966	9	9	P1P2	0.945041	0.0183214	9	9	P1P2	0.34933	0.0317042	9	9
AFAP1L1	P1P2	0.698894	0.00983052	8	8	P1P2	0.0154612	0.147598	8	8	P1P2	0.0375625	0.0748681	8	8
AFAP1L2	P1P2	0.718755	-0.0504694	9	9	P1P2	0.508213	0.07987	9	9	P1P2	0.739205	0.0162927	9	9
AFF1	P1P2	0.443176	-0.190417	9	9	P1P2	0.287855	0.0422716	9	9	P1P2	0.802049	0.0192161	9	9
AFF2	P1P2	0.969918	0.0665566	9	9	P1P2	0.192644	0.172138	9	9	P1P2	0.36533	0.126601	9	9
AFF3	P1P2	0.894986	-0.0237846	10	10	P1P2	0.664242	0.0155842	10	10	P1P2	0.787412	0.00427993	10	10
AFF4	P1P2	0.629897	-0.0615165	10	10	P1P2	0.774018	0.0108762	10	10	P1P2	0.664333	0.0151614	10	10
AFG3L2	P1P2	0.00365796	-0.257406	4	4	P1P2	0.023427	-0.458016	5	5	P1P2	0.0133839	-0.274263	4	4
AFM	P1P2	0.337924	0.0597003	10	10	P1P2	0.941081	0.0375693	10	10	P1P2	0.71921	0.0507167	10	10
AFMID	P1P2	0.500386	0.0754197	10	10	P1P2	0.390898	0.0620658	10	10	P1P2	0.272672	0.095287	10	10
AFP	P2	0.593818	0.0559389	10	10	P1	0.237266	-0.0577662	10	10	P1	0.246739	-0.0368857	10	10
AFTPH	P1P2	0.981485	-0.0371502	10	10	P1P2	0.124905	0.0394452	10	10	P1P2	0.346874	0.0335055	10	10
AGA	P1P2	0.380338	-0.139123	10	10	P1P2	0.199821	0.223463	10	10	P1P2	0.645707	0.0517607	10	10
AGAP1	P1P2	0.149375	-0.124686	9	9	P1P2	0.488364	0.0329834	9	9	P1P2	0.783497	-0.0920012	9	9
AGAP10	ENST00000413193.2	0.624656	-0.00421402	10	10	ENST00000413193.2	0.690692	-0.047211	10	10	ENST00000413193.2	0.584035	-0.0359868	10	10
AGAP11	P1P2	0.133076	0.116545	10	10	P1P2	0.175529	-0.0736875	10	10	P1P2	0.941499	-0.0346284	10	10
AGAP2	P1P2	0.889611	0.0122486	10	10	P1P2	0.679892	0.148134	10	10	P1P2	0.862176	0.0535842	10	10
AGAP3	P1P2	0.341663	0.160175	10	10	P1P2	0.391873	0.149586	10	10	P1P2	0.210677	0.199822	10	10
AGAP9	ENST00000453919.1	0.624656	-0.00421402	10	10	ENST00000453919.1	0.690692	-0.047211	10	10	ENST00000453919.1	0.584035	-0.0359868	10	10
AGBL1	ENST00000441037.2	0.657447	-0.00859797	10	10	ENST00000421325.2	0.265422	-0.139696	10	10	ENST00000421325.2	0.414592	-0.0277614	10	10
AGBL2	P1P2	0.822231	0.0929683	10	10	P1P2	0.653929	0.0540178	9	9	P1P2	0.653746	0.0743443	9	9
AGBL3	P1P2	0.0233531	0.0652888	10	10	P1P2	0.764921	-0.11428	10	10	P1P2	0.413236	0.0278266	10	10
AGBL4	P1P2	0.714375	0.0435339	10	10	P1P2	0.415614	0.03375	10	10	P1P2	0.36479	0.02831	10	10
AGBL5	P1	0.331876	-0.0671468	8	8	P2	0.1926	-0.0429321	10	10	P2	0.164746	-0.0665889	10	10
AGER	P1P2	0.187337	0.110072	10	10	P1P2	0.793324	-0.00378595	10	10	P1P2	0.27112	0.00699096	10	10
AGFG1	P1P2	0.517071	-0.0621276	10	10	P1P2	0.434202	0.0701362	10	10	P1P2	0.35222	-0.0685492	10	10
AGFG2	P1P2	0.650833	0.0134458	8	8	P1P2	0.258919	-0.234049	10	10	P1P2	0.880205	-0.0116378	8	8
AGGF1	P1P2	0.446892	-0.108282	9	9	P1P2	0.195627	0.240423	10	10	P1P2	0.795772	-0.00377457	9	9
AGK	P1P2	0.0527682	0.223749	9	9	P1P2	0.0526887	0.11562	9	9	P1P2	0.0196234	0.217947	9	9
AGL	P1P2	0.439484	-0.0093191	10	10	P1P2	0.492651	-0.0437595	9	9	P1P2	0.823632	0.0172729	9	9
AGMAT	P1P2	0.0207722	-0.192101	10	10	P1P2	0.413932	0.117831	10	10	P1P2	0.121714	0.0681854	10	10
AGMO	P1P2	0.762214	0.0542266	10	10	P1P2	0.482535	-0.0538948	10	10	P1P2	0.859613	-0.0566496	10	10
AGO1	P1P2	0.403928	-0.0763378	9	9	P1P2	0.637029	0.0436619	9	9	P1P2	0.664381	0.0351245	9	9
AGO2	P1P2	0.445103	-0.0950441	10	10	P1P2	0.740267	0.0665076	10	10	P1P2	0.570666	0.0318865	10	10
AGO3	P1P2	0.0974318	-0.0693257	10	10	P1P2	0.685176	0.130816	10	10	P1P2	0.456825	-0.0449083	10	10
AGO4	P1P2	0.418798	-0.00933914	8	8	P1P2	0.696224	0.15539	10	10	P1P2	0.460133	0.0814466	8	8
AGPAT1	P1	0.348612	-0.0829083	10	10	P2	0.176985	-0.0670434	10	10	P2	0.229865	-0.124869	10	10
AGPAT2	P1P2	0.820391	-0.0639462	10	10	P1P2	0.244174	0.200043	9	9	P1P2	0.196599	0.121562	9	9
AGPAT3	P1P2	0.427164	0.0262485	10	10	P1P2	0.240194	-0.037063	10	10	P1P2	0.812152	-0.0747053	10	10
AGPAT4	P1P2	0.801481	-0.182718	10	10	P1P2	0.162246	0.183707	10	10	P1P2	0.217566	-0.0155577	10	10
AGPAT5	P1P2	0.0701161	0.0985998	10	10	P1P2	0.151447	0.0492937	10	10	P1P2	0.044413	0.141749	10	10
AGPAT6	P1P2	0.69954	0.0489075	10	10	P1P2	0.664348	-0.0315563	10	10	P1P2	0.730774	0.0394806	10	10
AGPAT9	P1P2	0.435799	-0.0550726	9	9	P1P2	0.653482	-0.0587229	9	9	P1P2	0.749848	-0.0721299	9	9
AGPS	P1P2	0.219703	-0.0468812	9	9	P1P2	0.111592	-0.0684474	10	10	P1P2	0.406053	0.0897493	9	9
AGR2	P1P2	0.310089	0.0273951	10	10	P1P2	0.85715	0.104705	10	10	P1P2	0.637216	0.0664152	10	10
AGR3	P1P2	0.084436	-0.134732	9	9	P1P2	0.866522	0.0898655	9	9	P1P2	0.39	-0.0232366	9	9
AGRN	P1P2	0.406126	0.080833	9	9	P1P2	0.758583	0.059081	9	9	P1P2	0.645647	0.0537268	9	9
AGRP	P1P2	0.137033	-0.0317523	9	9	P1P2	0.0234166	-0.269287	10	10	P1P2	0.0278515	-0.123115	9	9
AGT	P1P2	0.14108	-0.130553	10	10	P1P2	0.348887	0.141373	10	10	P1P2	0.950705	-0.00288562	10	10
AGTPBP1	P1P2	0.993631	-0.0324698	10	10	P1P2	0.597425	-0.123145	10	10	P1P2	0.266499	-0.013952	10	10
AGTR1	P1P2	0.78161	0.12489	9	9	P1P2	0.817096	-0.0910444	9	9	P1P2	0.912385	0.0290918	9	9
AGTR2	P1P2	0.00179687	-0.154039	9	9	P1P2	0.605917	0.188742	10	10	P1P2	0.0606339	-0.114924	9	9
AGTRAP	P1P2	0.800336	-0.0173744	9	9	P1P2	0.30308	0.0904819	8	8	P1P2	0.394196	0.087575	8	8
AGXT	P1P2	0.397812	0.0433433	9	9	P1P2	0.703949	0.0654703	9	9	P1P2	0.464691	0.0554773	9	9
AGXT2	P1P2	0.593536	-0.0302742	9	9	P1P2	0.231853	-0.113548	9	9	P1P2	0.135294	-0.0587612	9	9
AHCTF1	P1P2	0.0527983	0.00823821	7	7	P1P2	0.127004	-0.237529	9	9	P1P2	0.214387	-0.0349509	7	7
AHCY	P1P2	0.946328	-0.0546251	9	9	P1P2	0.112288	0.142574	10	10	P1P2	0.0684906	0.080682	9	9
AHCYL1	P1	0.0152263	-0.114604	10	10	P1	0.0390935	-0.165937	10	10	P1	0.0038754	-0.116534	10	10
AHCYL2	P1P2	0.85649	-0.02012	8	8	P1P2	0.132376	-0.00993044	9	9	P1P2	0.35308	-0.00290277	8	8
AHDC1	P1P2	0.824186	0.00395977	10	10	P1P2	0.250705	0.160319	10	10	P1P2	0.409017	0.041257	10	10
AHI1	P1P2	0.0787314	0.138701	10	10	P1P2	0.472332	0.00574321	10	10	P1P2	0.490864	0.0168466	10	10
AHNAK	P2	0.329791	0.00340279	10	10	P1	0.477965	0.0472772	10	10	P2	0.64869	-0.0476029	10	10
AHNAK2	P2	0.105129	0.182966	10	10	P1	0.091569	0.131993	10	10	P2	0.254319	0.0949393	10	10
AHR	P1P2	0.866649	-0.00934676	10	10	P1P2	0.738714	-0.0564403	10	10	P1P2	0.761754	-0.0310731	10	10
AHRR	P1P2	0.448634	0.0941528	7	7	P1P2	0.892057	0.0668515	9	9	P1P2	0.668962	-0.00737209	7	7
AHSA1	P1P2	0.568584	-0.0946318	8	8	P1P2	0.0385395	-0.0949654	8	8	P1P2	0.0459301	-0.136099	8	8
AHSA2	P1P2	0.603573	0.0327624	10	10	P1P2	0.189458	0.0922733	10	10	P1P2	0.188656	0.0662319	10	10
AHSG	P1P2	0.801481	0.0561361	10	10	P1P2	0.819377	-0.0551894	10	10	P1P2	0.806867	0.0084765	10	10
AHSP	P1P2	0.676692	-0.0400378	10	10	P1P2	0.175388	0.0348053	10	10	P1P2	0.561037	0.0333498	10	10
AICDA	P1P2	0.711509	-0.0644805	10	10	P1P2	0.948917	0.129197	10	10	P1P2	0.795865	0.00934342	10	10
AIDA	P1P2	0.145117	0.0975915	10	10	P1P2	0.513657	-0.0636217	10	10	P1P2	0.628141	0.0280887	10	10
AIF1	P1P2	0.261714	-0.0377665	10	10	P1P2	0.672907	0.09282	10	10	P1P2	0.724317	-0.0205924	10	10
AIF1L	P1P2	0.891915	0.0701574	8	8	P1P2	0.634382	-0.0518943	8	8	P1P2	0.997222	-0.0201371	8	8
AIFM1	P1P2	0.172839	-0.135062	10	10	P1P2	0.984642	-0.0522221	10	10	P1P2	0.32762	-0.046719	10	10
AIFM2	P1P2	0.138858	-0.10762	10	10	P1P2	0.130005	0.138785	10	10	P1P2	0.766729	0.057676	10	10
AIFM3	P1	0.00615737	-0.112701	10	10	P2	0.929762	0.145855	9	9	P1	0.15844	-0.0889036	10	10
AIG1	P1P2	0.350439	0.186975	10	10	P1P2	0.190103	-0.167746	10	10	P1P2	0.734121	-0.00793844	10	10
AIM1	P1P2	0.669786	-0.0776667	10	10	P1P2	0.837356	0.0313018	10	10	P1P2	0.555257	-0.0430169	10	10
AIM1L	P2	0.177069	-0.195741	10	10	P1	0.245998	-0.112755	9	9	P2	0.671237	-0.115951	10	10
AIM2	P1P2	0.801781	0.0589417	9	9	P1P2	0.72929	0.120499	9	9	P1P2	0.95513	0.0578728	9	9
AIMP1	P1P2	0.157801	-0.0855003	10	10	P1P2	0.62566	-0.0529649	10	10	P1P2	0.145475	-0.026661	10	10
AIMP2	P1P2	0.0546591	-0.0970198	10	10	P1P2	0.681723	0.0996408	10	10	P1P2	0.629615	-0.0172033	10	10
AIP	P1P2	0.755351	0.00787969	10	10	P1P2	0.697311	0.0677252	10	10	P1P2	0.556848	0.0573214	10	10
AIPL1	P1P2	0.078832	0.141832	10	10	P1P2	0.215506	-0.224796	10	10	P1P2	0.966534	-0.006571	10	10
AIRE	P1P2	0.754004	0.064753	10	10	P1P2	0.0228213	-0.117472	10	10	P1P2	0.171983	-0.0509577	10	10
AJAP1	P1P2	0.911844	-0.0462694	10	10	P1P2	0.832881	0.0500486	10	10	P1P2	0.693866	-0.0583716	10	10
AJUBA	P1P2	0.289427	-0.0341296	10	10	P1P2	0.557973	0.0564143	10	10	P1P2	0.356379	-0.0258249	10	10
AK1	P1P2	0.882927	-0.0355004	9	9	P1P2	0.17965	-0.0585911	9	9	P1P2	0.198229	-0.020843	9	9
AK2	P1P2	0.128594	-0.108956	10	10	P1P2	0.389116	-0.236311	10	10	P1P2	0.0709374	-0.129341	10	10
AK3	P1P2	0.382515	0.192595	9	9	P1P2	0.68388	0.0841784	10	10	P1P2	0.927522	0.122265	9	9
AK4	P1P2	0.414624	-0.0302363	10	10	P1P2	0.331994	-0.0610789	10	10	P1P2	0.261051	-0.0814147	10	10
AK5	P1P2	0.348194	-0.0620901	9	9	P1P2	0.942206	0.102635	9	9	P1P2	0.690916	-0.0177091	9	9
AK7	P1P2	0.240198	-0.0440435	9	9	P1P2	0.113839	0.246187	9	9	P1P2	0.569204	0.0869914	9	9
AK8	P1P2	0.29725	0.145002	9	9	P1P2	0.800129	-0.14338	10	10	P1P2	0.329734	0.06072	9	9
AK9	P1P2	0.440184	-0.0233325	10	10	P1P2	0.150777	-0.1932	10	10	P1P2	0.709254	-0.0939472	10	10
AKAP1	P1P2	0.128259	-0.156572	10	10	P1P2	0.186893	-0.196605	10	10	P1P2	0.0461346	-0.169823	10	10
AKAP10	P1P2	0.565995	-0.0511101	10	10	P1P2	0.778409	0.0854228	10	10	P1P2	0.642305	-0.016202	10	10
AKAP11	P1P2	0.354425	-0.121031	8	8	P1P2	0.445134	0.0974743	9	9	P1P2	0.124511	-0.0873998	8	8
AKAP12	P1	0.106693	0.0552881	10	10	P2	0.24361	0.150824	9	9	P1	0.145475	0.0291332	10	10
AKAP13	P1P2	0.265709	0.123218	8	8	P1P2	0.669767	-0.0273521	9	9	P1P2	0.479694	0.0629187	8	8
AKAP14	P1P2	0.36469	-0.0836354	9	9	P1P2	0.845489	0.0102927	9	9	P1P2	0.616975	-0.027979	9	9
AKAP17A	P1P2	0.0229361	0.0916783	9	9	P1P2	0.172328	0.0544807	9	9	P1P2	0.0220744	0.0951928	9	9
AKAP2	P1P2	0.205875	-0.167885	10	10	P1P2	0.867082	0.108395	10	10	P1P2	0.662827	-0.0498201	10	10
AKAP3	P1	0.0631037	0.0664067	10	10	P1	0.0374222	0.202507	10	10	P1	0.00182497	0.0269783	10	10
AKAP4	P1P2	0.168731	-0.183082	10	10	P1P2	0.129447	-0.215511	10	10	P1P2	0.0621147	-0.173353	10	10
AKAP5	P1P2	0.523305	0.0134211	10	10	P1P2	0.899788	-0.0244817	10	10	P1P2	0.784675	0.00477158	10	10
AKAP6	P1P2	0.959093	0.0151134	10	10	P1P2	0.592235	-0.037955	10	10	P1P2	0.652319	-0.0225588	10	10
AKAP7	P1P2	0.837637	0.00365495	9	9	P1P2	0.766731	-0.0255556	9	9	P1P2	0.479908	-0.0122055	9	9
AKAP8	P1P2	0.895805	0.000288866	10	10	P1P2	0.884714	0.065323	9	9	P1P2	0.694376	0.0239213	9	9
AKAP8L	P1P2	0.159504	-0.0972842	10	10	P1P2	0.530468	-0.0681414	10	10	P1P2	0.210137	-0.0533245	10	10
AKAP9	P1P2	0.502927	0.0041223	10	10	P1P2	0.676127	0.0183449	10	10	P1P2	0.331444	-0.0265202	10	10
AKIP1	P1P2	0.323884	-0.0229963	10	10	P1P2	0.572581	0.0468405	10	10	P1P2	0.547925	-0.0485511	10	10
AKIRIN1	P1P2	0.0238353	-0.146866	10	10	P1P2	0.545794	-0.148677	10	10	P1P2	0.0285778	-0.103082	10	10
AKIRIN2	P1P2	0.889819	-0.0547629	9	9	P1P2	0.992145	-0.119444	10	10	P1P2	0.724154	0.0396166	9	9
AKNA	P2	0.108894	-0.178847	10	10	P2	0.535004	-0.168925	10	10	P2	0.105814	-0.129197	10	10
AKNAD1	ENST00000370001.3	0.726987	-0.0769358	10	10	ENST00000370001.3	0.397258	0.297329	10	10	ENST00000370001.3	0.882026	0.108713	10	10
AKR1A1	P1P2	0.765935	-0.0247628	10	10	P1P2	0.423571	0.207559	10	10	P1P2	0.686437	0.100698	10	10
AKR1B1	P1P2	0.765145	0.0516253	10	10	P1P2	0.429983	0.172694	10	10	P1P2	0.362285	0.085613	10	10
AKR1B10	P1P2	0.479571	-0.0390208	10	10	P1P2	0.522983	0.0999639	10	10	P1P2	0.766956	0.028702	10	10
AKR1B15	P1P2	0.22294	0.0280629	9	9	P1P2	0.438619	-0.0280646	10	10	P1P2	0.912137	0.0954388	9	9
AKR1C1	P1P2	0.53424	-0.0227907	8	8	P1P2	0.822517	0.0231577	8	8	P1P2	0.833617	-0.00855832	8	8
AKR1C2	P2	0.647324	-0.0103784	10	10	P2	0.260908	-0.0699137	10	10	P2	0.175453	-0.0958425	10	10
AKR1C3	P1P2	0.0061325	-0.148331	10	10	P1P2	0.140411	-0.154642	10	10	P1P2	0.00717566	-0.120694	10	10
AKR1C4	P1P2	0.68178	0.0457271	10	10	P1P2	0.0722047	0.108366	10	10	P1P2	0.0831596	0.0652991	10	10
AKR1D1	P1P2	0.466263	0.065053	10	10	P1P2	0.819948	0.00137616	10	10	P1P2	0.818829	0.00749901	10	10
AKR1E2	P1P2	0.895857	-0.000989749	9	9	P1P2	0.55669	-0.0818814	10	10	P1P2	0.28126	-0.048383	9	9
AKR7A2	P1P2	0.483837	-0.0601236	9	9	P1P2	0.601	-0.457428	10	10	P1P2	0.356947	-0.292328	9	9
AKR7A3	P1P2	0.751422	0.00703373	10	10	P1P2	0.390898	0.141939	10	10	P1P2	0.538682	0.0720349	10	10
AKT1	P1P2	0.499244	-0.0770493	9	9	P1P2	0.550591	-0.14769	10	10	P1P2	0.207315	-0.0413911	9	9
AKT1S1	P1P2	0.107047	-0.0621341	10	10	P1P2	0.8999	-0.0574759	9	9	P1P2	0.231589	-0.0293156	9	9
AKT2	P1P2	0.985494	0.0608728	10	10	P1P2	0.470794	0.0253016	10	10	P1P2	0.563036	0.037684	10	10
AKT3	P1P2	0.836288	-0.060045	10	10	P1P2	0.402193	0.00277425	10	10	P1P2	0.4993	-0.0376506	10	10
AKTIP	P1P2	0.669032	0.177884	10	10	P1P2	0.859458	0.0974675	10	10	P1P2	0.169115	0.0778239	10	10
ALAD	P1P2	0.00981333	-0.244942	5	5	P1P2	0.290527	-0.0915729	8	8	P1P2	0.0730422	-0.121775	5	5
ALAS1	P1P2	0.296687	0.0273438	10	10	P1P2	0.000272609	-0.209576	10	10	P1P2	0.00769526	-0.153115	10	10
ALAS2	P1P2	0.596583	0.0535338	10	10	P1P2	0.244456	-0.147181	10	10	P1P2	0.496667	-0.0278373	10	10
ALB	P2	0.261651	-0.134573	10	10	P1	0.296441	-0.144165	9	9	P1	0.333782	-0.105003	9	9
ALCAM	P1P2	0.970758	-0.0471334	10	10	P1P2	0.353594	0.114726	10	10	P1P2	0.576118	0.0112454	10	10
ALDH16A1	P1P2	0.707878	-0.044367	10	10	P1P2	0.0299936	-0.2218	10	10	P1P2	0.0204523	-0.10338	10	10
ALDH18A1	P1P2	0.125537	-0.0937858	10	10	P1P2	0.790494	-0.108483	10	10	P1P2	0.266499	-0.0736679	10	10
ALDH1A1	P1P2	0.244351	0.0361338	10	10	P1P2	0.893743	0.0998159	10	10	P1P2	0.814683	0.147661	10	10
ALDH1A2	P1P2	0.0088351	-0.109463	10	10	P1P2	0.443499	-0.0991693	10	10	P1P2	0.0310795	-0.0867286	10	10
ALDH1A3	P2	0.0193813	0.0829837	10	10	P2	0.408829	-0.0570815	10	10	P2	0.584646	0.027233	10	10
ALDH1B1	P1P2	0.226989	0.132033	9	9	P1P2	0.981585	0.105111	9	9	P1P2	0.383654	0.061974	9	9
ALDH1L1	P1P2	0.443255	-0.14942	10	10	P1P2	0.551081	0.134467	10	10	P1P2	0.976464	-0.0376541	10	10
ALDH1L2	P1P2	0.231021	-0.059955	10	10	P1P2	0.436711	-0.0192064	10	10	P1P2	0.429675	-0.0474689	10	10
ALDH2	P1P2	0.358814	-0.153603	10	10	P1P2	0.0519448	-0.0682179	10	10	P1P2	0.0402871	-0.116177	10	10
ALDH3A1	P1P2	0.0339611	-0.0177192	10	10	P1P2	0.606738	0.025422	10	10	P1P2	0.502317	-0.0411983	10	10
ALDH3A2	P1P2	0.069478	-0.134926	10	10	P1P2	0.241786	0.114811	10	10	P1P2	0.697153	-0.0238514	10	10
ALDH3B1	P1P2	0.303724	0.0261232	9	9	P1P2	0.726847	0.0288625	9	9	P1P2	0.437472	0.0274928	9	9
ALDH3B2	P1P2	0.672911	0.00125406	10	10	P1P2	0.196084	0.188824	10	10	P1P2	0.171054	0.0985924	10	10
ALDH4A1	P1P2	0.517358	0.0560479	10	10	P1P2	0.38863	-0.0526636	10	10	P1P2	0.928531	-0.0219784	10	10
ALDH5A1	P1P2	0.263	0.00395693	9	9	P1P2	0.148494	-0.287129	10	10	P1P2	0.834353	-0.0344161	9	9
ALDH6A1	P1P2	0.875262	-0.0504641	10	10	P1P2	0.221888	0.12466	10	10	P1P2	0.478264	0.0688025	10	10
ALDH7A1	P1P2	0.886495	-0.0469522	9	9	P1P2	0.713575	-0.0233857	10	10	P1P2	0.475257	-0.0278414	9	9
ALDH8A1	P1P2	0.489641	-0.0668358	10	10	P1P2	0.0448832	0.320872	10	10	P1P2	0.110699	0.0975039	10	10
ALDH9A1	P1P2	0.955015	0.119202	9	9	P1P2	0.696718	-0.106981	9	9	P1P2	0.541747	-0.00258662	9	9
ALDOA	P1P2	0.638618	-0.0514584	8	8	P1P2	0.0348288	0.212033	9	9	P1P2	0.273622	0.0766105	8	8
ALDOB	P1	0.170707	0.0724819	10	10	P1	0.125629	-0.14205	10	10	P2	0.152404	-0.0700969	10	10
ALDOC	P1P2	0.331702	-0.143252	10	10	P1P2	0.290737	0.0435161	10	10	P1P2	0.85938	0.0181844	10	10
ALG1	P1P2	0.671215	0.0318773	9	9	P1P2	0.137469	0.135002	10	10	P1P2	0.25001	0.112294	9	9
ALG10	P1P2	0.846114	0.0311716	10	10	P1P2	0.931264	0.193369	10	10	P1P2	0.875478	0.0735198	10	10
ALG10B	P1P2	0.166637	-0.0342474	10	10	P1P2	0.247747	0.157122	10	10	P1P2	0.634467	0.0130678	10	10
ALG11	P1P2	0.633366	-0.166647	10	10	P1P2	0.412842	0.0502915	10	10	P1P2	0.852864	-0.0539654	10	10
ALG12	P1P2	0.0274172	-0.100157	10	10	P1P2	0.260908	-0.150671	10	10	P1P2	0.0613299	-0.120843	10	10
ALG13	P1P2	0.846114	0.0964768	10	10	P1P2	0.654879	0.0861289	10	10	P1P2	0.471666	0.0579278	10	10
ALG14	P1P2	0.0892574	0.129333	9	9	P1P2	0.609823	0.383365	10	10	P1P2	0.0238204	0.146385	9	9
ALG1L	ENST00000340333.3	0.844031	-0.0198438	10	10	ENST00000340333.3	0.384279	-0.0843365	10	10	ENST00000340333.3	0.446488	-0.0936468	10	10
ALG2	P1P2	0.229814	0.0498576	10	10	P1P2	0.42221	0.245123	10	10	P1P2	0.33798	0.154401	10	10
ALG3	P1P2	0.969297	-0.0393097	9	9	P1P2	0.163306	0.0582248	9	9	P1P2	0.293294	0.0353212	9	9
ALG5	P1P2	0.0138399	0.152853	10	10	P1P2	0.402771	0.0325859	10	10	P1P2	0.0830015	0.12994	10	10
ALG6	P1P2	0.393396	0.0427659	10	10	P1P2	0.75742	0.0384578	10	10	P1P2	0.909467	0.0692703	10	10
ALG8	P1P2	0.992806	-0.0561681	10	10	P1P2	0.351616	-0.0525743	10	10	P1P2	0.644217	-0.0597557	10	10
ALG9	P1P2	0.415047	-0.114009	10	10	P1P2	0.331701	0.0088546	10	10	P1P2	0.224616	-0.0362288	10	10
ALK	P1P2	0.703047	0.0762976	10	10	P1P2	0.423315	-0.0589906	10	10	P1P2	0.479	-0.0270783	10	10
ALKBH1	P1P2	0.00372607	0.156075	9	9	P1P2	0.404435	0.101694	9	9	P1P2	0.0336669	0.150595	9	9
ALKBH2	P1P2	0.356882	0.0333928	10	10	P1P2	0.221888	-0.077601	10	10	P1P2	0.655528	-0.046145	10	10
ALKBH3	P1P2	0.608219	0.0209445	10	10	P1P2	0.0692732	0.121288	10	10	P1P2	0.143923	0.0875718	10	10
ALKBH4	P1P2	0.661621	0.0908121	10	10	P1P2	0.224625	0.137307	10	10	P1P2	0.148034	0.109539	10	10
ALKBH5	P1P2	0.141009	-0.0382803	8	8	P1P2	0.116365	-0.178074	10	10	P1P2	0.108914	-0.0404683	8	8
ALKBH6	P1P2	0.561303	-0.0289461	10	10	P1P2	0.289932	0.0797808	10	10	P1P2	0.67817	0.0800165	10	10
ALKBH7	P1P2	0.0450559	0.17835	9	9	P1P2	0.10675	0.159701	10	10	P1P2	0.0360629	0.1343	9	9
ALKBH8	P1P2	0.522581	0.0300681	9	9	P1P2	0.278406	-0.0918625	9	9	P1P2	0.649691	-0.0488639	9	9
ALLC	P1P2	0.254867	0.048292	10	10	P1P2	0.287595	-0.0629084	10	10	P1P2	0.709254	-0.0224768	10	10
ALMS1	P1P2	0.594841	0.039397	10	10	P1P2	0.901417	0.0704531	10	10	P1P2	0.526028	0.0310632	10	10
ALOX12	P1P2	0.723655	0.159437	9	9	P1P2	0.330166	-0.0867164	10	10	P1P2	0.842903	-0.0117427	9	9
ALOX12B	P1P2	0.0573465	0.107884	9	9	P1P2	0.281773	0.155224	10	10	P1P2	0.0660134	0.101476	9	9
ALOX15	P1P2	0.949438	-0.0274451	10	10	P1P2	0.683664	0.079495	10	10	P1P2	0.899837	0.0556507	10	10
ALOX15B	P1P2	0.595911	0.0597745	9	9	P1P2	0.373654	0.133663	9	9	P1P2	0.416373	0.0953348	9	9
ALOX5	P1P2	0.114824	0.103953	10	10	P1P2	0.458946	-0.123466	10	10	P1P2	0.788781	0.0220788	10	10
ALOX5AP	P1P2	0.71162	-0.0475869	10	10	P1P2	0.589394	0.0510099	10	10	P1P2	0.858216	0.045354	10	10
ALOXE3	P1P2	0.697352	0.035529	10	10	P1P2	0.318481	0.070743	10	10	P1P2	0.56544	-0.00848289	10	10
ALPI	P1P2	0.657155	0.0306391	8	8	P1P2	0.410343	-0.0246694	8	8	P1P2	0.563172	-0.0010865	8	8
ALPK1	P1P2	0.89335	0.0206394	10	10	P1P2	0.972219	0.0628884	10	10	P1P2	0.949052	0.00702032	10	10
ALPK2	ENST00000361673.3	0.164293	-0.0579674	10	10	ENST00000361673.3	0.260286	-0.0819321	10	10	ENST00000361673.3	0.0969152	-0.0917288	10	10
ALPK3	P1P2	0.059077	0.0804303	8	8	P1P2	0.762624	-0.0258889	8	8	P1P2	0.26443	0.0829184	8	8
ALPL	P2	0.630842	-0.0105546	10	10	P1	0.187532	-0.0474463	10	10	P1	0.313181	-0.0430663	10	10
ALPP	P1P2	0.912548	0.0771763	10	10	P1P2	0.482535	-0.221784	10	10	P1P2	0.762658	-0.0734647	10	10
ALPPL2	P1P2	0.860026	-0.0684577	10	10	P1P2	0.905723	0.0163901	10	10	P1P2	0.778756	0.0170304	10	10
ALS2	P1P2	0.438784	-0.129627	10	10	P1P2	0.613223	0.233879	10	10	P1P2	0.823441	0.0353314	10	10
ALS2CL	P1P2	0.935045	0.00956362	9	9	P1P2	0.144369	0.210963	10	10	P1P2	0.144951	-0.0301044	9	9
ALS2CR11	P1P2	0.261526	0.0840083	10	10	P1P2	0.638099	-0.0187484	10	10	P1P2	0.738368	0.0228957	10	10
ALS2CR12	P1P2	0.479372	0.0516136	9	9	P1P2	0.832051	0.0354142	9	9	P1P2	0.681492	0.0164041	9	9
ALX1	P1P2	0.108959	-0.0610376	10	10	P1P2	0.648737	-0.0301991	10	10	P1P2	0.339178	0.0630339	10	10
ALX3	P1P2	0.316901	-0.0469851	10	10	P1P2	0.650914	0.148055	9	9	P1P2	0.71014	0.00100289	9	9
ALX4	P1P2	0.232307	0.0944129	9	9	P1P2	0.338627	-0.249688	10	10	P1P2	0.849512	-0.056097	9	9
ALYREF	P1P2	0.105412	-0.062022	8	8	P1P2	0.822133	0.149174	8	8	P1P2	0.79118	-0.0713915	8	8
AMACR	P1P2	0.526871	0.024106	10	10	P1P2	0.181505	0.10567	10	10	P1P2	0.167467	0.0625856	10	10
AMBN	P1P2	0.324682	0.0266849	10	10	P1P2	0.769859	-0.0551913	10	10	P1P2	0.893268	-0.0230479	10	10
AMBP	P1P2	0.587694	0.0505222	10	10	P1P2	0.432046	-0.086161	10	10	P1P2	0.588114	-0.0180237	10	10
AMBRA1	P1P2	0.631683	0.24043	10	10	P1P2	0.63684	-0.000903564	10	10	P1P2	0.940556	0.149943	10	10
AMD1	P1P2	0.947412	-0.0575474	8	8	P1P2	0.0942841	0.0995891	10	10	P1P2	0.396962	0.134997	8	8
AMDHD1	P1P2	0.206034	0.0643149	10	10	P1P2	0.629934	0.0327001	10	10	P1P2	0.152999	0.0450282	10	10
AMDHD2	P1P2	0.895487	-0.14617	9	9	P1P2	0.246726	0.055017	10	10	P1P2	0.501542	0.0371673	9	9
AMELX	P1P2	0.800453	0.00856794	10	10	P1P2	0.419666	0.039746	10	10	P1P2	0.488442	0.017513	10	10
AMELY	P1P2	0.143128	-0.0193471	10	10	P1P2	0.971751	0.0360909	10	10	P1P2	0.491985	-0.0799553	10	10
AMER1	P1P2	0.518028	-0.00739141	10	10	P1P2	0.82292	0.0040416	10	10	P1P2	0.767409	0.0339045	10	10
AMER2	P1P2	0.31905	-0.0567374	10	10	P1P2	0.573982	0.0818658	10	10	P1P2	0.955664	0.0140165	10	10
AMER3	P1P2	0.829483	0.0161905	10	10	P1P2	0.179449	-0.0507383	10	10	P1P2	0.392727	-0.0510491	10	10
AMFR	P1P2	0.577038	0.0360315	9	9	P1P2	0.677685	-0.0350094	9	9	P1P2	0.828989	0.0159823	9	9
AMH	P1P2	0.709528	0.0458949	10	10	P1P2	0.260535	0.0305571	10	10	P1P2	0.52178	0.0432794	10	10
AMHR2	P1P2	0.274358	-0.0815172	10	10	P1P2	0.0791225	0.178496	10	10	P1P2	0.584442	0.0551152	10	10
AMICA1	P1P2	0.213827	-0.0154452	10	10	P1P2	0.546184	0.129854	10	10	P1P2	0.867772	0.0508368	10	10
AMIGO1	P1P2	0.454855	0.06125	10	10	P1P2	0.416035	0.128893	10	10	P1P2	0.197685	0.114126	10	10
AMIGO2	P1P2	0.462119	-0.0379703	9	9	P1P2	0.392849	-0.385796	10	10	P1P2	0.322649	-0.138155	9	9
AMIGO3	P1	0.180653	0.101646	10	10	P1	0.642514	0.0295175	10	10	P1	0.338429	0.052231	10	10
AMMECR1	P1P2	0.161885	0.0493332	10	10	P1P2	0.648631	-0.0462532	10	10	P1P2	0.680124	0.0284072	10	10
AMMECR1L	P1P2	0.0950364	-0.0423714	9	9	P1P2	0.0125962	-0.197077	9	9	P1P2	0.00979686	-0.137108	9	9
AMN	P2	0.322725	-0.0175756	10	10	P2	0.483818	-0.0861007	10	10	P2	0.311619	-0.0568998	10	10
AMN1	P1P2	0.140761	-0.000584053	10	10	P1P2	0.621398	0.0472351	10	10	P1P2	0.674917	-0.0116525	10	10
AMOT	P1P2	0.225315	0.0862301	10	10	P1P2	0.734283	0.00805248	10	10	P1P2	0.836155	0.0999216	10	10
AMOTL1	P1P2	0.607288	-0.0243782	10	10	P1P2	0.515648	-0.0436747	10	10	P1P2	0.451462	-0.0377581	10	10
AMOTL2	P1P2	0.0942061	-0.0360018	9	9	P1P2	0.530083	0.0385033	10	10	P1P2	0.414583	-0.0839382	9	9
AMPD1	P1P2	0.692765	-0.0301771	10	10	P1P2	0.604276	0.0373925	10	10	P1P2	0.949996	-0.00697218	10	10
AMPD2	P2	0.00969309	-0.148101	10	10	P2	0.855305	0.0486082	10	10	P2	0.096796	-0.0942269	10	10
AMPD3	P1P2	0.806742	-0.0414544	10	10	P1P2	0.0939377	0.0823863	10	10	P1P2	0.0925234	0.0152364	10	10
AMPH	P1P2	0.960229	-0.028874	9	9	P1P2	0.790731	0.0196054	9	9	P1P2	0.631575	0.0186619	9	9
AMT	P1P2	0.0114214	-0.135947	10	10	P1P2	0.312859	-0.0641376	9	9	P1P2	0.0529232	-0.101004	9	9
AMTN	P1P2	0.933442	0.0582056	10	10	P1P2	0.575484	0.12881	10	10	P1P2	0.704185	0.0456556	10	10
AMY1B	ENST00000330330.5,ENST00000370080.3	0.210308	0.0506739	10	10	ENST00000330330.5,ENST00000370080.3	0.249012	0.144015	10	10	ENST00000330330.5,ENST00000370080.3	0.0663397	0.0780542	10	10
AMY2A	P1P2	0.774637	-0.0387968	10	10	P1P2	0.968704	-0.0537379	10	10	P1P2	0.729659	-0.0236262	10	10
AMY2B	P1P2	0.976504	-0.0129335	9	9	P1P2	0.156131	0.179861	9	9	P1P2	0.161208	0.105428	9	9
AMZ1	P1P2	0.855615	0.00855559	10	10	P1P2	0.614152	0.0723865	10	10	P1P2	0.647837	-0.0135567	10	10
AMZ2	P1P2	0.157323	0.0545823	10	10	P1P2	0.216324	0.0560155	10	10	P1P2	0.1265	0.0547592	10	10
ANAPC1	P1P2	0.105341	0.0411178	8	8	P1P2	0.566321	0.210471	9	9	P1P2	0.298405	0.071392	7	7
ANAPC10	P1P2	0.333279	0.0152037	8	8	P1P2	0.85654	-0.00129956	9	9	P1P2	0.294331	0.0141812	8	8
ANAPC11	P1P2	0.960036	-0.116291	10	10	P1P2	0.954301	-0.0308964	10	10	P1P2	0.996333	-0.062733	10	10
ANAPC13	P1P2	0.793403	0.0115521	5	5	P1P2	0.122341	-0.675515	8	8	P1P2	0.695432	-0.0969395	5	5
ANAPC15	P1P2	0.416148	-0.100767	10	10	P1P2	0.271267	0.0145079	10	10	P1P2	0.206279	-0.0620851	10	10
ANAPC16	P1P2	0.274228	0.0343646	10	10	P1P2	0.888052	-0.012464	10	10	P1P2	0.673617	0.0496697	10	10
ANAPC2	P1P2	0.67951	0.0335753	5	5	P1P2	0.799824	0.0611134	6	6	P1P2	0.397826	0.0361191	5	5
ANAPC4	P1P2	0.109259	0.0752978	4	4	P1P2	0.585122	-0.025461	3	3	P1P2	0.658768	0.014943	3	3
ANAPC5	P1P2	0.276943	-0.0909777	8	8	P1P2	0.118843	-0.0848818	8	8	P1P2	0.143225	-0.199854	7	7
ANAPC7	P1P2	0.127224	-0.09234	10	10	P1P2	0.603251	-0.139553	10	10	P1P2	0.321793	-0.110944	10	10
ANG	P1P2	0.958504	-0.0478645	10	10	P1P2	0.642829	0.0748042	10	10	P1P2	0.621215	-0.0103137	10	10
ANGEL1	P1P2	0.304068	-0.138899	10	10	P1P2	0.0851754	0.117571	10	10	P1P2	0.740159	0.0149474	10	10
ANGEL2	P1P2	0.915714	0.0172773	10	10	P1P2	0.576186	0.0472423	10	10	P1P2	0.46006	-0.0329261	10	10
ANGPT1	P1P2	0.293891	-0.102325	10	10	P1P2	0.461892	0.156332	10	10	P1P2	0.928531	0.00574241	10	10
ANGPT2	P1P2	0.821965	-0.0630973	9	9	P1P2	0.244218	-0.190311	10	10	P1P2	0.398326	-0.0502223	9	9
ANGPT4	P1P2	0.586982	-0.041118	10	10	P1P2	0.809112	-0.0354353	10	10	P1P2	0.721207	-0.0140779	10	10
ANGPTL1	P1P2	0.0934954	-0.0324364	10	10	P1P2	0.859689	0.031386	10	10	P1P2	0.495916	-0.0400791	10	10
ANGPTL2	P1P2	0.219822	-0.20406	10	10	P1P2	0.512521	-0.00782578	10	10	P1P2	0.922171	-0.1072	10	10
ANGPTL3	P1P2	0.658988	0.0749629	9	9	P1P2	0.823963	-0.0041943	9	9	P1P2	0.800841	-0.00667804	9	9
ANGPTL4	P1P2	0.782232	-0.0569789	10	10	P1P2	0.145503	0.0589057	10	10	P1P2	0.621424	0.0772725	10	10
ANGPTL5	P1P2	0.340014	0.0111849	10	10	P1P2	0.179973	0.118852	10	10	P1P2	0.613488	0.0258393	10	10
ANGPTL6	P1P2	0.225886	0.100129	8	8	P1P2	0.48647	-0.181205	8	8	P1P2	0.795526	0.0167327	8	8
ANGPTL7	P1P2	0.426132	-0.0309516	10	10	P1P2	0.654879	-0.026321	10	10	P1P2	0.665841	-0.0027891	10	10
ANHX	P1P2	0.795089	-0.0209502	10	10	P1P2	0.985814	0.0757824	10	10	P1P2	0.967479	0.0339538	10	10
ANK1	P1P2	0.567897	-0.0184226	10	10	P1P2	0.860612	0.0165259	10	10	P1P2	0.586889	0.0141087	10	10
ANK2	ENST00000264366.6	0.936734	-0.0100974	10	10	ENST00000264366.6	0.346774	-0.081865	10	10	ENST00000264366.6	0.382789	-0.0440616	10	10
ANK3	P1P2	0.249175	-0.165191	10	10	P1P2	0.259034	-0.0601697	9	9	P1P2	0.522258	-0.0257655	9	9
ANKAR	P1P2	0.426496	-0.13859	9	9	P1P2	0.0320983	-0.186033	9	9	P1P2	0.0390453	-0.137089	9	9
ANKDD1A	P1P2	0.0759069	0.118655	10	10	P1P2	0.772893	-0.0339769	10	10	P1P2	0.376356	0.0320122	10	10
ANKDD1B	P1P2	0.691901	-0.0197636	9	9	P1P2	0.386943	0.121019	9	9	P1P2	0.431591	0.0532351	9	9
ANKEF1	P1P2	0.111639	-0.158988	9	9	P1P2	0.94611	-0.0607961	10	10	P1P2	0.38008	-0.086091	9	9
ANKFN1	P1P2	0.791214	0.0893774	10	10	P1P2	0.166257	-0.268971	10	10	P1P2	0.259168	-0.0933519	10	10
ANKFY1	P1P2	0.206139	0.110335	8	8	P1P2	0.399499	0.090459	8	8	P1P2	0.243057	0.126674	8	8
ANKH	P1P2	0.547636	0.0563291	10	10	P1P2	0.618703	-0.0387628	10	10	P1P2	0.943623	-0.020284	10	10
ANKHD1	P1P2	0.0296354	0.168228	10	10	P1P2	0.0715087	0.167158	10	10	P1P2	0.00744126	0.132787	10	10
ANKHD1-EIF4EBP3	P1P2	0.0296354	0.168228	10	10	P1P2	0.0715087	0.167158	10	10	P1P2	0.00744126	0.132787	10	10
ANKIB1	P1P2	0.776541	-0.0075689	8	8	P1P2	0.854233	-0.0156827	8	8	P1P2	0.814774	-0.0223222	8	8
ANKK1	P1P2	0.200834	0.0938229	10	10	P1P2	0.00294	-0.131923	10	10	P1P2	0.122	-0.0632604	10	10
ANKLE1	P1P2	0.0432129	-0.17769	10	10	P1P2	0.936054	-0.0345767	10	10	P1P2	0.255556	-0.13216	10	10
ANKLE2	P1P2	0.390548	-0.153375	9	9	P1P2	0.799096	0.241921	9	9	P1P2	0.385191	-0.0389896	9	9
ANKMY1	P1P2	0.549165	0.0518833	9	9	P1P2	0.0912024	0.186044	10	10	P1P2	0.22928	0.0617696	9	9
ANKMY2	P1P2	0.275008	0.0684165	10	10	P1P2	0.939561	-0.0516466	10	10	P1P2	0.501185	0.0365642	10	10
ANKRA2	P1P2	0.0384187	-0.101936	9	9	P1P2	0.692027	-0.0651642	9	9	P1P2	0.15314	-0.107094	9	9
ANKRD1	P1P2	0.194864	0.0255843	10	10	P1P2	0.845055	0.000863738	10	10	P1P2	0.598576	0.00826791	10	10
ANKRD10	P1P2	0.293687	0.0773546	10	10	P1P2	0.144127	-0.0639781	10	10	P1P2	0.580781	-0.00308214	10	10
ANKRD11	P1P2	0.393738	-0.202402	9	9	P1P2	0.385584	-0.038955	9	9	P1P2	0.392071	-0.154699	9	9
ANKRD12	P1P2	0.365354	0.0284469	10	10	P1P2	0.108809	0.191093	10	10	P1P2	0.102653	0.122181	10	10
ANKRD13A	P1P2	0.209628	0.0786821	9	9	P1P2	0.698833	0.142387	10	10	P1P2	0.763636	0.00933076	9	9
ANKRD13B	P1P2	0.194558	0.107601	10	10	P1P2	0.557184	-0.044373	10	10	P1P2	0.504019	0.0343069	10	10
ANKRD13C	P1P2	0.25759	0.0656526	9	9	P1P2	0.462404	0.0149351	9	9	P1P2	0.229522	0.0842925	9	9
ANKRD13D	P1P2	0.315072	0.0622698	9	9	P1P2	0.0563113	0.212918	10	10	P1P2	0.0811167	0.132222	9	9
ANKRD16	P1P2	0.405246	-0.0878285	9	9	P1P2	0.0845686	-0.277689	9	9	P1P2	0.364668	-0.122305	9	9
ANKRD17	P1P2	0.386925	-0.097629	8	8	P1P2	0.780131	0.0596842	9	9	P1P2	0.949896	0.0384371	8	8
ANKRD18A	ENST00000564591.1,ENST00000566717.2	0.227244	-0.0776414	10	10	ENST00000564591.1,ENST00000566717.2	0.581311	-0.039743	10	10	ENST00000564591.1,ENST00000566717.2	0.134338	-0.0366522	10	10
ANKRD18B	P1P2	0.703814	0.0137956	10	10	P1P2	0.487772	0.00297856	10	10	P1P2	0.521587	0.0130946	10	10
ANKRD2	P1P2	0.0352644	-0.109909	10	10	P1P2	0.0849093	-0.150511	10	10	P1P2	0.00566509	-0.096666	10	10
ANKRD22	P1P2	0.0762154	-0.0705756	7	7	P1P2	0.132455	-0.261731	9	9	P1P2	0.221003	-0.0454145	7	7
ANKRD23	P1	0.0801035	-0.0759494	8	8	P1	0.170939	0.157834	8	8	P2	0.591387	0.0624416	10	10
ANKRD24	P1P2	0.0644236	-0.165532	9	9	P1P2	0.594323	-0.159469	9	9	P1P2	0.187232	-0.153867	9	9
ANKRD26	P1P2	0.207736	0.161268	10	10	P1P2	0.161937	0.00480094	10	10	P1P2	0.653816	0.0451412	10	10
ANKRD27	P1P2	0.019597	0.102305	10	10	P1P2	0.877035	0.0192922	10	10	P1P2	0.270733	0.0373925	10	10
ANKRD28	P1P2	0.734992	-0.0384887	10	10	P1P2	0.117911	0.13985	10	10	P1P2	0.427255	0.0434957	10	10
ANKRD29	P1P2	0.221111	-0.040702	9	9	P1P2	0.7704	0.0468812	9	9	P1P2	0.35809	-0.0598511	9	9
ANKRD30A	P1P2	0.541942	0.0179482	10	10	P1P2	0.619739	-0.0732811	10	10	P1P2	0.928766	-0.0423724	10	10
ANKRD30B	P1P2	0.912313	-0.0358725	10	10	P1P2	0.219617	0.139775	10	10	P1P2	0.293681	0.0447843	10	10
ANKRD31	P1P2	0.124049	0.16202	10	10	P1P2	0.326241	0.0253315	10	10	P1P2	0.054146	0.0808558	10	10
ANKRD32	P1P2	0.432778	-0.0736296	10	10	P1P2	0.225861	-0.0265077	10	10	P1P2	0.15317	-0.0404363	10	10
ANKRD33	P1P2	0.405385	-0.0733107	10	10	P1P2	0.770645	0.0785756	10	10	P1P2	0.696934	0.0240807	10	10
ANKRD33B	P1P2	0.0361612	0.169701	10	10	P1P2	0.285667	0.109898	10	10	P1P2	0.0609201	0.152081	10	10
ANKRD34A	P2	0.384607	0.0619124	10	10	P2	0.451759	-0.02635	10	10	P2	0.347939	0.0235087	10	10
ANKRD34B	P1	0.0946277	-0.0925061	10	10	P2	0.179048	0.167013	9	9	P1	0.0277694	-0.128935	10	10
ANKRD34C	P1P2	0.1086	0.04399	10	10	P1P2	0.800697	0.0339412	10	10	P1P2	0.315177	0.0144861	10	10
ANKRD35	P1P2	0.955325	0.0238957	10	10	P1P2	0.907819	-0.119286	10	10	P1P2	0.974809	-0.072083	10	10
ANKRD36	P1P2	0.561602	-0.0884001	10	10	P1P2	0.283617	-0.0468303	10	10	P1P2	0.161703	-0.0474766	10	10
ANKRD36C	P1P2	0.768193	0.033138	8	8	P1P2	0.073381	-0.16744	9	9	P1P2	0.328055	-0.0152502	8	8
ANKRD37	P1P2	0.182343	0.0784599	10	10	P1P2	0.53452	0.0690768	10	10	P1P2	0.166829	0.060121	10	10
ANKRD39	P1P2	0.353909	0.0255572	9	9	P1P2	0.783819	0.0719065	9	9	P1P2	0.463546	0.0489615	9	9
ANKRD40	P1P2	0.490105	-0.0611632	10	10	P1P2	0.370463	-0.128586	10	10	P1P2	0.430889	-0.10876	10	10
ANKRD42	P1P2	0.0231913	-0.168971	10	10	P1P2	0.90747	0.179235	10	10	P1P2	0.119164	0.0193128	10	10
ANKRD44	ENST00000450567.1	0.0892971	-0.0309784	10	10	ENST00000450567.1	0.102138	-0.173877	10	10	ENST00000450567.1	0.00989533	-0.0879799	10	10
ANKRD45	P1P2	0.712501	0.0364647	10	10	P1P2	0.981829	-0.0661708	10	10	P1P2	0.624149	0.00892177	10	10
ANKRD46	P1P2	0.487933	0.0438378	9	9	P1P2	0.0842618	0.181528	9	9	P1P2	0.144091	0.0244411	9	9
ANKRD49	P1P2	0.815062	0.020538	9	9	P1P2	0.99691	0.0415032	9	9	P1P2	0.712469	-0.0377697	9	9
ANKRD50	P1P2	0.639483	0.301932	10	10	P1P2	0.61178	0.0511247	10	10	P1P2	0.36479	0.107034	10	10
ANKRD52	P1P2	0.626059	-0.0705301	9	9	P1P2	0.130789	-0.141961	10	10	P1P2	0.372995	-0.183258	9	9
ANKRD53	P1P2	0.610703	0.138827	10	10	P1P2	0.582898	0.0641917	9	9	P1P2	0.745111	0.0648841	9	9
ANKRD54	P1P2	0.958387	-0.0143524	10	10	P1P2	0.795478	-0.0530661	10	10	P1P2	0.6085	0.0338247	10	10
ANKRD55	ENST00000341048.4	0.779098	-0.195601	9	9	ENST00000341048.4	0.396018	-0.0677373	9	9	ENST00000341048.4	0.247062	-0.147308	9	9
ANKRD6	P1P2	0.516026	-0.0604407	8	8	P1P2	0.281439	0.0603288	9	9	P1P2	0.289774	0.0244539	8	8
ANKRD60	ENST00000457363.1	0.0877762	0.0879494	10	10	ENST00000457363.1	0.269989	-0.189801	10	10	ENST00000457363.1	0.736802	0.0244276	10	10
ANKRD61	P1P2	0.942979	0.00725189	9	9	P1P2	0.484677	-0.156208	9	9	P1P2	0.397803	-0.0636848	9	9
ANKRD62	P1P2	0.365902	-0.0565185	10	10	P1P2	0.207556	-0.149587	10	10	P1P2	0.145229	-0.103385	10	10
ANKRD63	P1P2	0.748172	0.101773	10	10	P1P2	0.672585	-0.0871015	10	10	P1P2	0.770128	-0.0236439	10	10
ANKRD65	P1	0.197472	-0.0420189	10	10	P1	0.394723	0.209417	10	10	P2	0.716993	0.0410921	10	10
ANKRD66	P1P2	0.0847703	-0.1173	10	10	P1P2	0.230398	-0.100494	10	10	P1P2	0.0874658	-0.139361	10	10
ANKRD7	P2	0.175227	-0.122416	10	10	P1	0.685411	-0.0190953	9	9	P2	0.256176	-0.0218919	10	10
ANKRD9	P1P2	0.947693	-0.0089293	9	9	P1P2	0.937691	-0.0325895	10	10	P1P2	0.911641	-0.00453779	9	9
ANKS1A	P1P2	0.545178	0.0295857	10	10	P1P2	0.840227	0.27605	10	10	P1P2	0.64997	0.14512	10	10
ANKS1B	ENST00000329257.7,ENST00000547776.2	0.474168	-0.0587866	10	10	ENST00000329257.7,ENST00000547776.2	0.752618	0.0508584	10	10	ENST00000329257.7,ENST00000547776.2	0.508762	-0.051235	10	10
ANKS3	P1P2	0.870372	-0.0469098	10	10	P1P2	0.218735	-0.0287508	10	10	P1P2	0.381013	-0.0228115	10	10
ANKS4B	P1P2	0.0824991	0.116732	10	10	P1P2	0.0601729	-0.107122	10	10	P1P2	0.749582	-0.00690669	10	10
ANKS6	P1P2	0.461753	0.0273106	10	10	P1P2	0.526623	-0.0233779	10	10	P1P2	0.912053	-0.017647	10	10
ANKUB1	ENST00000446160.1	0.301433	-0.0704292	10	10	ENST00000446160.1	0.587773	-0.00667413	10	10	ENST00000446160.1	0.282779	-0.0163302	10	10
ANKZF1	P1P2	0.417675	-0.105148	10	10	P1P2	0.526911	-0.0552412	10	10	P1P2	0.178495	-0.0655161	10	10
ANLN	P1P2	0.0545289	-0.0564994	10	10	P1P2	0.91481	-0.030944	10	10	P1P2	0.195219	-0.0267273	10	10
ANO1	P1P2	0.454498	0.0431046	10	10	P1P2	0.251919	-0.0603362	10	10	P1P2	0.791749	-0.0342641	10	10
ANO10	P1P2	0.480214	-0.0316553	10	10	P1P2	0.389035	0.12779	10	10	P1P2	0.884834	0.0436669	10	10
ANO2	P1P2	0.0389552	-0.187818	10	10	P1P2	0.898625	0.070973	10	10	P1P2	0.248072	-0.0525096	10	10
ANO3	P1P2	0.45871	0.0707721	9	9	P1P2	0.220214	0.068276	9	9	P1P2	0.201188	0.111117	9	9
ANO4	P1P2	0.149867	-0.0655211	10	10	P1P2	0.630038	-0.0501628	10	10	P1P2	0.119374	-0.0368085	10	10
ANO5	P1P2	0.0390252	-0.126904	10	10	P1P2	0.54238	-0.0248383	10	10	P1P2	0.192473	-0.175429	10	10
ANO6	P1P2	0.348529	0.0864448	8	8	P1P2	0.145179	-0.108317	10	10	P1P2	0.996428	0.0647781	8	8
ANO7	P1P2	0.736071	-0.0463127	9	9	P1P2	0.685866	0.0438234	9	9	P1P2	0.84217	0.0275101	9	9
ANO8	P1P2	0.849008	-0.0705989	10	10	P1P2	0.880557	-0.0509213	9	9	P1P2	0.948408	0.0502603	9	9
ANO9	P1P2	0.356728	-0.0935543	10	10	P1P2	0.474508	0.0825767	10	10	P1P2	0.784903	-0.0346852	10	10
ANP32A	P1P2	0.844339	0.0500838	9	9	P1P2	0.883294	-0.0102164	10	10	P1P2	0.646994	0.00675814	9	9
ANP32B	P1P2	0.117675	0.0975411	10	10	P1P2	0.746379	0.0998439	10	10	P1P2	0.503452	0.102828	10	10
ANP32D	P1P2	0.638849	0.0821149	10	10	P1P2	0.145382	0.0773619	10	10	P1P2	0.317038	0.0881153	10	10
ANP32E	P1P2	0.369834	0.0965867	10	10	P1P2	0.61891	-0.00349905	10	10	P1P2	0.902889	-0.0244938	10	10
ANPEP	P2	0.175321	-0.0212652	10	10	P1	0.175904	-0.149777	10	10	P2	0.0690135	-0.0898769	10	10
ANTXR1	P1P2	0.0875293	-0.131734	10	10	P1P2	0.429039	-0.0505705	10	10	P1P2	0.614738	-0.048213	10	10
ANTXR2	P1P2	0.768192	-0.0433265	10	10	P1P2	0.583327	0.0269362	10	10	P1P2	0.635523	0.00474534	10	10
ANXA1	P1P2	0.615477	-0.0356764	10	10	P1P2	0.812644	0.106455	10	10	P1P2	0.722539	-0.00621481	10	10
ANXA10	P1P2	0.888209	-0.0363972	10	10	P1P2	0.691017	-0.0483313	10	10	P1P2	0.990182	-0.0515064	10	10
ANXA11	P1P2	0.90341	0.0531136	10	10	P1P2	0.633592	-0.0560141	10	10	P1P2	0.773984	0.0281622	10	10
ANXA13	P1P2	0.409905	0.112789	10	10	P1P2	0.301262	-0.0197092	10	10	P1P2	0.894206	9.16e-05	10	10
ANXA2	P1P2	0.983372	-0.036872	10	10	P1P2	0.517168	-0.0387477	10	10	P1P2	0.607048	-0.06292	10	10
ANXA2R	P1P2	0.246153	-0.0539072	10	10	P1P2	0.269862	-0.122019	10	10	P1P2	0.183231	-0.104577	10	10
ANXA3	P1P2	0.597198	-0.043685	10	10	P1P2	0.746935	0.00414709	10	10	P1P2	0.64741	-0.0347272	10	10
ANXA4	P1P2	0.158193	-0.17818	10	10	P1P2	0.177693	0.020544	10	10	P1P2	0.895144	-0.0654475	10	10
ANXA5	P1P2	0.266455	-0.0263839	10	10	P1P2	0.534424	0.0171484	10	10	P1P2	0.974099	-0.0316167	10	10
ANXA6	P1P2	0.981839	0.03218	10	10	P1P2	0.354128	0.0393227	10	10	P1P2	0.432973	0.0223095	10	10
ANXA7	P1P2	0.569928	0.0546967	9	9	P1P2	0.3855	0.0477714	9	9	P1P2	0.804225	0.0041739	9	9
ANXA8	P1P2	0.704583	0.0344068	10	10	P1P2	0.861074	0.0497259	10	10	P1P2	0.623939	0.0292773	10	10
ANXA8L1	ENST00000359178.4	0.474168	0.130408	10	10	ENST00000359178.4	0.138171	0.194731	10	10	ENST00000359178.4	0.0457151	0.110989	10	10
ANXA9	P1P2	0.706779	0.015655	10	10	P1P2	0.824635	0.0043624	10	10	P1P2	0.881558	0.0142416	10	10
AOAH	P1P2	0.965691	0.0124188	10	10	P1P2	0.656365	0.0204159	10	10	P1P2	0.671454	0.0222682	10	10
AOC1	P1	0.486175	0.184616	9	9	P2	0.0191456	0.24678	10	10	P2	0.0724326	0.174139	10	10
AOC2	P1P2	0.892283	0.0436229	9	9	P1P2	0.46225	-0.09962	10	10	P1P2	0.182367	0.0109735	9	9
AOC3	P1P2	0.364025	0.0861187	10	10	P1P2	0.865233	0.0777223	10	10	P1P2	0.518125	0.0994871	10	10
AOX1	P1	0.640752	-0.246442	10	10	P2	0.422295	0.0434887	10	10	P1	0.737473	-0.189291	10	10
AP1AR	P1P2	0.443606	-0.0223416	10	10	P1P2	0.897928	0.129821	10	10	P1P2	0.645068	0.0491351	10	10
AP1B1	P1P2	0.592459	0.0359683	9	9	P1P2	0.100272	0.138304	10	10	P1P2	0.265788	0.0712005	9	9
AP1G1	P1P2	0.911376	-0.013938	10	10	P1P2	0.977961	-0.0525822	10	10	P1P2	0.764693	-0.0193565	10	10
AP1G2	P1P2	0.226675	-0.091442	10	10	P1P2	0.178356	-0.0833853	10	10	P1P2	0.056254	-0.129913	10	10
AP1M1	P1P2	0.770982	-0.0021477	9	9	P1P2	0.884469	0.0280479	9	9	P1P2	0.558704	-0.0683913	8	8
AP1M2	P1P2	0.208003	0.0057803	10	10	P1P2	0.0118176	0.252767	10	10	P1P2	0.00406203	0.129166	10	10
AP1S1	P1P2	0.841048	0.022533	9	9	P1P2	0.561821	0.035741	9	9	P1P2	0.606233	0.028701	9	9
AP1S2	P1P2	0.651791	0.031349	10	10	P1P2	0.630351	0.0274799	10	10	P1P2	0.662827	-0.00817273	10	10
AP1S3	P1P2	0.682431	-0.0685364	10	10	P1P2	0.960037	-0.0750356	10	10	P1P2	0.773303	-0.0590491	10	10
AP2A1	P1P2	0.0683057	0.26849	10	10	P1P2	0.428096	-0.0789435	10	10	P1P2	0.290151	0.127581	10	10
AP2A2	P1P2	0.73232	0.13131	10	10	P1P2	0.00689637	-0.183565	10	10	P1P2	0.087356	-0.0982199	10	10
AP2B1	P1P2	0.929528	0.0343503	8	8	P1P2	0.477925	-0.224975	9	9	P1P2	0.841389	0.00511043	8	8
AP2M1	P2	0.206868	-0.116579	9	9	P1	0.108511	0.129808	5	5	P1	0.070451	0.0575662	4	4
AP2S1	P1P2	0.759268	0.0314255	6	6	P1P2	0.751749	-0.0911414	8	8	P1P2	0.896545	-0.0710838	6	6
AP3B1	P1P2	0.469707	0.0897662	10	10	P1P2	0.369208	-0.0311338	10	10	P1P2	0.778756	0.0106506	10	10
AP3B2	P1P2	0.685361	-0.0302001	9	9	P1P2	0.0996203	-0.141218	9	9	P1P2	0.104264	-0.0499354	9	9
AP3D1	P1P2	0.186459	0.101012	9	9	P1P2	0.219066	-0.0554244	10	10	P1P2	0.714801	0.045107	9	9
AP3M1	P1P2	0.573319	0.125003	10	10	P1P2	0.398406	0.140224	10	10	P1P2	0.99515	0.0586015	10	10
AP3M2	P1P2	0.803195	-0.0980363	10	10	P1P2	0.776092	0.135872	9	9	P1P2	0.458415	0.0955752	9	9
AP3S1	P1P2	0.845535	-0.0257356	10	10	P1P2	0.346398	0.116218	10	10	P1P2	0.490678	0.0569553	10	10
AP3S2	P1P2	0.99316	0.0431273	10	10	P1P2	0.905956	0.0279511	10	10	P1P2	0.933716	0.000575672	10	10
AP4B1	P1P2	0.89335	0.0816637	10	10	P1P2	0.0291799	-0.295056	10	10	P1P2	0.053998	-0.147389	10	10
AP4E1	P1P2	0.523498	0.0833489	10	10	P1P2	0.127082	0.123785	9	9	P1P2	0.266191	0.114225	9	9
AP4M1	P1P2	0.341035	0.107072	9	9	P1P2	0.229263	0.0717357	9	9	P1P2	0.237619	0.0810114	9	9
AP4S1	P1P2	0.206812	0.093274	9	9	P1P2	0.768861	-0.00102807	9	9	P1P2	0.44576	0.0654291	8	8
AP5B1	P1P2	0.329082	0.0824847	9	9	P1P2	0.206818	-0.0376685	9	9	P1P2	0.621384	-0.00993874	9	9
AP5M1	P1P2	0.936028	0.0505345	10	10	P1P2	0.795138	0.0244224	10	10	P1P2	0.707269	0.0462195	10	10
AP5S1	P1P2	0.0916599	0.147624	9	9	P1P2	0.196746	0.0289739	10	10	P1P2	0.114578	0.110582	9	9
AP5Z1	P1P2	0.87543	0.00932583	9	9	P1P2	0.302156	0.0645882	10	10	P1P2	0.780136	0.0666599	9	9
APAF1	P1P2	0.607495	0.002869	10	10	P1P2	0.290871	0.0131835	10	10	P1P2	0.38782	0.0651563	10	10
APBA1	P1P2	0.343844	0.064615	10	10	P1P2	0.144167	0.0696855	10	10	P1P2	0.0825287	0.068929	10	10
APBA2	P1P2	0.129638	-0.0576472	10	10	P1P2	0.116879	-0.0742713	10	10	P1P2	0.0373763	-0.110564	10	10
APBA3	P1P2	0.574316	-0.109672	8	8	P1P2	0.462913	-0.0269191	8	8	P1P2	0.145705	-0.0479476	8	8
APBB1	P1P2	0.911844	0.0476779	10	10	P1P2	0.333387	-0.168871	10	10	P1P2	0.381658	-0.0762989	10	10
APBB1IP	P1P2	0.471252	-0.177905	10	10	P1P2	0.148866	-0.119146	10	10	P1P2	0.0459083	-0.0998245	10	10
APBB2	P1P2	0.350591	0.0500993	10	10	P1P2	0.937574	0.101088	10	10	P1P2	0.534187	0.0510224	10	10
APBB3	P1P2	0.966398	-0.0924046	10	10	P1P2	0.369365	0.0682006	10	10	P1P2	0.877114	0.046996	10	10
APC	P1	0.231539	0.0867375	10	10	P2	0.0682884	-0.102519	10	10	P2	0.48584	-0.00238304	10	10
APC2	P1	0.146838	0.128173	10	10	P2	0.169098	-0.0425937	8	8	P1	0.109915	0.0594878	9	9
APCDD1	P1P2	0.622355	-0.0667271	10	10	P1P2	0.813784	-0.0336736	10	10	P1P2	0.636581	-0.0266661	10	10
APCDD1L	P1P2	0.950615	0.0258078	10	10	P1P2	0.605404	-0.0186702	10	10	P1P2	0.675784	-0.0231555	10	10
APCS	P1P2	0.233772	-0.0701503	9	9	P1P2	0.155297	-0.121228	10	10	P1P2	0.185047	-0.0436033	9	9
APEH	P1P2	0.650514	0.0958522	10	10	P1P2	0.165987	0.0678532	10	10	P1P2	0.467113	0.126616	10	10
APEX1	P1P2	0.291518	-0.0944864	10	10	P1P2	0.643883	0.0947471	10	10	P1P2	0.563036	-0.0531333	10	10
APEX2	P1P2	0.65617	0.0391555	9	9	P1P2	0.133816	0.189466	9	9	P1P2	0.065646	0.0949906	9	9
APH1A	P1P2	0.0711748	0.167374	10	10	P1P2	0.502263	-0.0182772	10	10	P1P2	0.166738	0.0516616	10	10
APH1B	P1P2	0.513921	-0.028089	10	10	P1P2	0.0811	0.0669737	10	10	P1P2	0.213392	0.0205729	10	10
API5	P1P2	0.0260787	0.150674	10	10	P1P2	0.187729	0.207548	10	10	P1P2	0.0821625	0.223619	10	10
APIP	P1P2	0.799373	-0.0470353	9	9	P1P2	0.269036	0.133259	9	9	P1P2	0.445447	-0.0258377	9	9
APITD1	P1P2	0.847619	0.0145334	10	10	P1P2	0.474236	0.051604	10	10	P1P2	0.409017	0.0123024	10	10
APITD1-CORT	P1P2	0.847619	0.0145334	10	10	P1P2	0.474236	0.051604	10	10	P1P2	0.409017	0.0123024	10	10
APLF	P1P2	0.40736	0.0520961	9	9	P1P2	0.24286	-0.184586	9	9	P1P2	0.842414	-0.0624853	9	9
APLN	P1P2	0.826834	-0.0455867	10	10	P1P2	0.76694	-0.0986791	10	10	P1P2	0.728099	-0.0853029	10	10
APLNR	P1P2	0.635894	0.0509365	10	10	P1P2	0.239137	-0.0483926	10	10	P1P2	0.33396	-0.001819	10	10
APLP1	P1P2	0.687971	-0.0666985	10	10	P1P2	0.339221	0.01552	10	10	P1P2	0.712125	-0.0413276	10	10
APLP2	P1P2	0.532767	0.174376	9	9	P1P2	0.138787	-0.174262	9	9	P1P2	0.547977	-0.00275787	9	9
APMAP	P1P2	0.209019	0.0879661	10	10	P1P2	0.594369	-0.0272478	10	10	P1P2	0.713009	0.0452253	10	10
APOA1	P1P2	0.67918	-0.0809793	10	10	P1P2	0.314718	-0.199069	10	10	P1P2	0.277366	-0.141313	10	10
APOA1BP	P1P2	0.0539371	0.125375	10	10	P1P2	0.0121621	0.295176	10	10	P1P2	0.00228598	0.189055	10	10
APOA2	P1P2	0.650662	0.100016	9	9	P1P2	0.735722	0.0149678	10	10	P1P2	0.454634	-0.00344789	9	9
APOA4	P1P2	0.849008	-0.0280675	10	10	P1P2	0.215397	-0.0280987	10	10	P1P2	0.300688	-0.0320573	10	10
APOA5	P1P2	0.914658	0.0262941	10	10	P1P2	0.942484	0.111655	10	10	P1P2	0.721207	0.0201623	10	10
APOB	P1P2	0.938262	-0.0462278	10	10	P1P2	0.536068	-0.0951762	10	10	P1P2	0.458621	-0.0466875	10	10
APOBEC1	P1P2	0.862	-0.0428621	10	10	P1P2	0.194109	0.0135433	10	10	P1P2	0.254442	-0.0342152	10	10
APOBEC2	P1P2	0.728208	0.0458369	10	10	P1P2	0.615495	0.0168338	10	10	P1P2	0.432799	-0.00356313	10	10
APOBEC3A	P1P2	0.536458	-0.0139627	9	9	P1P2	0.764839	0.0323012	9	9	P1P2	0.573454	0.0186694	9	9
APOBEC3A_B	P1P2	0.536458	-0.0139627	9	9	P1P2	0.764839	0.0323012	9	9	P1P2	0.573454	0.0186694	9	9
APOBEC3B	P1P2	0.185514	0.0707322	10	10	P1P2	0.594573	-0.178878	10	10	P1P2	0.568252	0.0093071	10	10
APOBEC3C	P1P2	0.482423	-0.0569903	10	10	P1P2	0.578796	-0.0444176	10	10	P1P2	0.461141	-0.0600021	10	10
APOBEC3D	P1P2	0.482423	-0.0569903	10	10	P1P2	0.578796	-0.0444176	10	10	P1P2	0.461141	-0.0600021	10	10
APOBEC3F	P1P2	0.876777	0.0764929	10	10	P1P2	0.766491	-0.105803	10	10	P1P2	0.804571	-0.0208198	10	10
APOBEC3G	P1P2	0.334829	0.0602748	9	9	P1P2	0.307688	-0.0795267	9	9	P1P2	0.893818	-0.0403064	9	9
APOBEC3H	P1P2	0.467168	-0.0292211	10	10	P1P2	0.775369	0.0375241	10	10	P1P2	0.648903	-0.0332119	10	10
APOBEC4	P1P2	0.0267407	-0.134557	10	10	P1P2	0.682586	-0.0641197	10	10	P1P2	0.0460698	-0.0327629	10	10
APOBR	P2	0.0221975	0.197076	10	10	P1	0.697311	0.142888	10	10	P2	0.109971	0.109464	10	10
APOC1	P1P2	0.762665	0.0702803	10	10	P1P2	0.312601	-0.0159761	10	10	P1P2	0.3285	0.0500627	10	10
APOC2	P1P2	0.558318	0.0538544	10	10	P1P2	0.386693	-0.0423134	10	10	P1P2	0.880622	0.00472763	10	10
APOC3	P1P2	0.667016	-0.0947569	9	9	P1P2	0.0317616	-0.131804	10	10	P1P2	0.0457096	-0.0348951	9	9
APOC4	P1P2	0.237356	0.0984328	10	10	P1P2	0.812986	0.0450501	10	10	P1P2	0.343994	0.0696829	10	10
APOD	P1P2	0.895571	0.02116	10	10	P1P2	0.978782	0.0145561	10	10	P1P2	0.968898	-0.0272473	10	10
APOE	P1P2	0.597814	0.0839973	10	10	P1P2	0.0399811	-0.12553	10	10	P1P2	0.100732	-0.053412	10	10
APOF	P1P2	0.643505	-0.069005	10	10	P1P2	0.150402	0.107953	10	10	P1P2	0.182938	0.0312234	10	10
APOH	P1	0.0928903	0.0180932	10	10	P2	0.324145	0.0461875	10	10	P1	0.746212	0.0376268	10	10
APOL1	P1P2	0.862465	0.0196379	10	10	P1P2	0.0133043	-0.0630706	10	10	P1P2	0.0478785	-0.0466873	10	10
APOL2	P1P2	0.609668	0.00366615	10	10	P1P2	0.595184	0.10723	10	10	P1P2	0.923349	0.0904083	10	10
APOL3	P1P2	0.188577	0.105052	10	10	P1P2	0.890258	0.106677	10	10	P1P2	0.309497	0.0913036	10	10
APOL4	P1P2	0.0514108	0.134712	10	10	P1P2	0.890606	-0.224046	10	10	P1P2	0.28371	0.00393981	10	10
APOL5	ENST00000249044.2	0.861082	0.0584701	9	9	ENST00000249044.2	0.409496	-0.0751142	10	10	ENST00000249044.2	0.211856	0.0412017	9	9
APOL6	P1P2	0.0262845	-0.0492382	9	9	P1P2	0.221909	-0.0237641	9	9	P1P2	0.0452709	-0.0885365	9	9
APOLD1	P1P2	0.421421	-0.083073	10	10	P1P2	0.800697	0.0882188	10	10	P1P2	0.686001	0.0463263	10	10
APOM	P1P2	0.486566	-0.0243616	9	9	P1P2	0.812872	0.0583398	10	10	P1P2	0.611923	-0.0162135	9	9
APOO	P1P2	0.616621	0.0696344	10	10	P1P2	0.615599	0.0163709	10	10	P1P2	0.738815	0.0398612	10	10
APOOL	P1P2	0.00348311	0.258012	10	10	P1P2	0.00654215	0.0861783	10	10	P1P2	5.55e-05	0.184049	10	10
APOPT1	P1P2	0.490849	-0.154153	10	10	P1P2	0.350098	0.0535791	10	10	P1P2	0.984742	-0.0251718	10	10
APP	P1P2	0.289292	0.111793	10	10	P1P2	0.00894671	-0.275674	10	10	P1P2	0.0684718	-0.19133	10	10
APPBP2	P1P2	0.155853	0.0375985	10	10	P1P2	0.26366	-0.0518031	10	10	P1P2	0.106326	-0.0401874	10	10
APPL1	P1P2	0.394776	0.0596291	9	9	P1P2	0.0862578	0.104678	9	9	P1P2	0.102543	0.0978848	9	9
APPL2	P1P2	0.0442939	-0.0921292	10	10	P1P2	0.428524	-0.165487	10	10	P1P2	0.0857222	-0.113395	10	10
APRT	P1P2	0.282949	-0.0455683	10	10	P1P2	0.235869	0.121511	10	10	P1P2	0.173289	0.0404083	10	10
APTX	P2	0.448547	0.0368696	10	10	P2	0.0764494	-0.184546	10	10	P1	0.298065	0.000413695	10	10
AQP1	ENST00000509504.1	0.74336	-0.0692667	10	10	ENST00000509504.1	0.664028	0.0634578	10	10	ENST00000509504.1	0.786727	0.0278809	10	10
AQP10	P1P2	0.714706	-0.0318692	10	10	P1P2	0.311757	-0.0312771	10	10	P1P2	0.311052	-0.0249101	10	10
AQP11	P1P2	0.873282	-0.0451822	10	10	P1P2	0.0213528	-0.231134	10	10	P1P2	0.0548537	-0.141466	10	10
AQP12A	P1P2	0.207092	0.167703	9	9	P1P2	0.0155656	0.25136	10	10	P1P2	0.0178612	0.143758	9	9
AQP12B	P1P2	0.564229	0.0230951	9	9	P1P2	0.536208	0.102131	9	9	P1P2	0.298639	0.0341714	9	9
AQP2	P1P2	0.740069	0.0362819	9	9	P1P2	0.266694	-0.0637141	9	9	P1P2	0.611703	-0.0483873	9	9
AQP3	P2	0.0784632	0.0992684	8	8	P1	0.721262	-0.121404	10	10	P2	0.461342	0.0477689	8	8
AQP4	P1P2	0.800453	-0.0668289	10	10	P1P2	0.556	-0.0488626	10	10	P1P2	0.300273	-0.0193903	10	10
AQP5	P1P2	0.565595	0.0743003	10	10	P1P2	0.0584694	0.204162	10	10	P1P2	0.0604314	0.139652	10	10
AQP6	P1P2	0.368888	-0.0293832	10	10	P1P2	0.797179	0.119429	10	10	P1P2	0.990655	0.00998962	10	10
AQP7	P1P2	0.104149	0.0288962	10	10	P1P2	0.119438	0.109921	10	10	P1P2	0.0399417	0.0811666	10	10
AQP8	P1P2	0.509926	0.0630573	10	10	P1P2	0.120418	0.0114057	10	10	P1P2	0.154025	-0.021107	10	10
AQP9	P1P2	0.482147	0.0528504	10	10	P1P2	0.535875	0.0308888	10	10	P1P2	0.379403	0.0486505	10	10
AQPEP	P1P2	0.296072	-0.106942	10	10	P1P2	0.511009	-0.14395	10	10	P1P2	0.328794	-0.109109	10	10
AQR	P1P2	0.989172	-0.000673797	1	1	P1P2	0.0171133	-0.189285	3	3	P1P2	0.306624	-0.0518175	1	1
AR	P1P2	0.187189	0.018044	10	10	P1P2	0.947384	-0.0514742	9	9	P1P2	0.778697	-0.0247673	9	9
ARAF	P1P2	0.907743	0.0159863	10	10	P1P2	0.292956	-0.0745602	10	10	P1P2	0.297102	-0.0188183	10	10
ARAP1	P2	0.340324	0.0279412	9	9	P1	0.30975	0.203472	9	9	P1	0.0380481	0.0649074	9	9
ARAP2	P1P2	0.849587	0.0717933	10	10	P1P2	0.0933911	-0.179973	10	10	P1P2	0.414592	-0.0497537	10	10
ARAP3	P1P2	0.0806623	0.173693	9	9	P1P2	0.36926	-0.186543	9	9	P1P2	0.915112	0.0496923	9	9
ARC	P1P2	0.376683	-0.09447	9	9	P1P2	0.716291	0.013203	9	9	P1P2	0.439504	-0.0330694	9	9
ARCN1						P1P2	0.267986	-0.0889695	1	1
AREG	P1P2	0.233621	-0.0561726	10	10	P1P2	0.537328	0.0656775	10	10	P1P2	0.940792	-0.0419759	10	10
AREL1	P1P2	0.209502	0.105105	10	10	P1P2	0.887472	0.126732	10	10	P1P2	0.803195	0.214639	10	10
ARF1	P1P2	0.72732	0.0278855	10	10	P1P2	0.618288	-0.013281	10	10	P1P2	0.71921	-0.0208277	10	10
ARF3	P1P2	0.131291	0.105726	10	10	P1P2	0.554424	0.0706471	10	10	P1P2	0.139821	0.0954038	10	10
ARF4	P1P2	0.195661	-0.108229	9	9	P1P2	0.686688	0.198961	10	10	P1P2	0.363842	-0.0224711	9	9
ARF5	P1	0.125062	0.0247694	8	8	P1	0.387474	0.0660176	8	8	P1	0.186643	0.10107	8	8
ARF6	P2	0.633577	0.0695908	10	10	P1	0.0886415	0.118231	10	10	P1	0.0598251	0.0392587	10	10
ARFGAP1	P1P2	0.288881	-0.173829	9	9	P1P2	0.683135	0.0513174	9	9	P1P2	0.813915	-0.0731176	9	9
ARFGAP2	P1P2	0.681928	-0.0337857	9	9	P1P2	0.834372	0.0265728	10	10	P1P2	0.990273	-0.0366984	9	9
ARFGAP3	P1P2	0.944025	-0.0700648	10	10	P1P2	0.620361	-0.0295947	10	10	P1P2	0.624569	-0.0254929	10	10
ARFGEF1	P1P2	0.146222	0.143651	10	10	P1P2	0.551867	-0.179809	10	10	P1P2	0.933009	-0.00101922	10	10
ARFGEF2	P1P2	0.356343	-0.0152074	10	10	P1P2	0.411669	-0.0614756	10	10	P1P2	0.297927	-0.0791723	10	10
ARFIP1	P1P2	0.700307	-0.0118222	10	10	P1P2	0.794004	-0.025803	10	10	P1P2	0.829446	-0.0322344	10	10
ARFIP2	P1P2	0.188179	0.0351177	9	9	P1P2	0.713863	0.0148027	9	9	P1P2	0.261648	0.0182458	9	9
ARFRP1	P1P2	0.189232	0.0487808	8	8	P1P2	0.205516	0.153026	8	8	P1P2	0.127051	0.115299	8	8
ARG1	P1P2	0.557921	0.038102	10	10	P1P2	0.282233	0.140908	10	10	P1P2	0.224163	0.095976	10	10
ARG2	P1P2	0.755688	0.0575774	10	10	P1P2	0.388792	-0.0366935	10	10	P1P2	0.490305	0.0531326	10	10
ARGFX	P1P2	0.529292	-0.0282382	9	9	P1P2	0.375821	-0.0483685	9	9	P1P2	0.762921	-0.0297189	9	9
ARGLU1	P1P2	0.00701133	0.110393	6	6	P1P2	0.288952	0.0718565	6	6	P1P2	0.0104055	0.0762353	6	6
ARHGAP1	P1P2	0.125531	0.0615693	9	9	P1P2	0.0371675	0.476836	10	10	P1P2	0.0111419	0.207537	9	9
ARHGAP10	P1P2	0.366424	-0.0326994	9	9	P1P2	0.265895	0.107972	9	9	P1P2	0.74408	-0.0451799	8	8
ARHGAP11A	P1P2	0.108503	-0.15586	10	10	P1P2	0.257003	-0.168482	10	10	P1P2	0.0441627	-0.128741	10	10
ARHGAP11B	P1P2	0.595695	-0.0148723	9	9	P1P2	0.134193	-0.301672	10	10	P1P2	0.36915	-0.0732758	9	9
ARHGAP12	P1P2	0.914658	-0.0504409	10	10	P1P2	0.953247	-0.166857	10	10	P1P2	0.960862	-0.0419264	10	10
ARHGAP15	P1P2	0.116811	0.0459492	10	10	P1P2	0.718403	0.0298035	10	10	P1P2	0.164746	0.0438705	10	10
ARHGAP17	P1P2	0.929682	-0.0139692	10	10	P1P2	0.0262704	0.156957	10	10	P1P2	0.167375	0.094043	10	10
ARHGAP18	P1P2	0.518411	0.092956	10	10	P1P2	0.537134	0.0698999	10	10	P1P2	0.622262	0.0246861	10	10
ARHGAP19	P1P2	0.976416	0.0618816	10	10	P1P2	0.171535	0.215454	10	10	P1P2	0.22952	0.142211	10	10
ARHGAP20	P1P2	0.40739	0.00616526	10	10	P1P2	0.951024	0.00310169	10	10	P1P2	0.715222	0.0151297	10	10
ARHGAP21	P1P2	0.588815	-0.0487009	10	10	P1P2	0.958632	0.130093	10	10	P1P2	0.931359	0.0302805	10	10
ARHGAP22	P1P2	0.404884	-0.0943047	10	10	P1P2	0.39033	0.153867	10	10	P1P2	0.818598	0.00735051	10	10
ARHGAP23	P1P2	0.00661496	0.186508	10	10	P1P2	0.0038036	0.262063	10	10	P1P2	0.000163285	0.183969	10	10
ARHGAP24	P1P2	0.271574	-0.0923712	8	8	P1P2	0.885927	0.0986792	8	8	P1P2	0.60068	-0.0399094	8	8
ARHGAP25	P1P2	0.69331	-0.0662433	10	10	P1P2	0.0139415	0.141138	10	10	P1P2	0.168015	0.0761726	10	10
ARHGAP26	P1P2	0.900913	-0.138858	9	9	P1P2	0.17399	-0.20071	9	9	P1P2	0.287306	-0.110723	9	9
ARHGAP27	P2	0.0945111	-0.0579331	10	10	P1	0.243267	0.0440976	10	10	P2	0.052212	-0.147418	10	10
ARHGAP28	P1P2	0.309174	-0.0549357	10	10	P1P2	0.483084	0.0707604	10	10	P1P2	0.904533	-0.0249047	10	10
ARHGAP29	P1P2	0.743472	-0.0312598	10	10	P1P2	0.446477	-0.0754165	10	10	P1P2	0.777846	-0.0782082	10	10
ARHGAP30	P1P2	0.377056	0.0474444	10	10	P1P2	0.379161	0.083118	10	10	P1P2	0.389451	0.125691	10	10
ARHGAP31	P1P2	0.382515	-0.050529	9	9	P1P2	0.0834298	0.113802	9	9	P1P2	0.371153	0.0479621	9	9
ARHGAP32	ENST00000310343.9	0.910438	0.182707	10	10	ENST00000310343.9	0.24553	-0.172897	10	10	ENST00000310343.9	0.497795	-0.0702479	10	10
ARHGAP33	P1P2	0.294371	0.045353	9	9	P1P2	0.989247	-0.0460243	9	9	P1P2	0.574732	0.0369754	9	9
ARHGAP35	ENST00000404338.3	0.695057	0.0744985	10	10	ENST00000404338.3	0.174081	0.221685	10	10	ENST00000404338.3	0.265607	0.164054	10	10
ARHGAP36	P1P2	0.143017	0.110971	9	9	P1P2	0.759408	-0.068344	9	9	P1P2	0.556127	0.0249763	9	9
ARHGAP39	P1P2	0.360583	0.0566106	9	9	P1P2	0.710745	0.135231	9	9	P1P2	0.390862	0.0413045	9	9
ARHGAP4	P1	0.0636298	0.0619308	10	10	P1	0.310353	0.139163	10	10	P1	0.0606347	0.110317	10	10
ARHGAP40	P1P2	0.639146	-0.098552	9	9	P1P2	0.847066	0.0780604	9	9	P1P2	0.708279	0.0260927	9	9
ARHGAP42	P1P2	0.311934	0.0438075	8	8	P1P2	0.762477	0.135582	9	9	P1P2	0.88413	0.0760847	8	8
ARHGAP44	P1P2	0.866765	0.0902569	10	10	P1P2	0.05345	-0.279527	9	9	P1P2	0.0246873	-0.121486	9	9
ARHGAP5	P1P2	0.802745	-0.112539	9	9	P1P2	0.958859	-0.0109979	9	9	P1P2	0.701603	-0.00482908	8	8
ARHGAP6	P1P2	0.947085	0.0591055	10	10	P1P2	0.169792	-0.0923241	10	10	P1P2	0.453067	-0.0506671	10	10
ARHGAP8	P1	0.482884	-0.0132177	10	10	P2	0.099153	0.109031	10	10	P2	0.347026	0.0380457	10	10
ARHGAP9	P1P2	0.39833	0.0257591	10	10	P1P2	0.160794	0.298932	10	10	P1P2	0.482321	0.137143	10	10
ARHGDIA	P1P2	0.340561	0.0440988	9	9	P1P2	0.484185	-0.127592	10	10	P1P2	0.813429	-0.0221948	9	9
ARHGDIB	P1P2	0.261087	0.0266659	10	10	P1P2	0.678277	0.0458131	10	10	P1P2	0.903593	0.0361932	10	10
ARHGDIG	P1P2	0.825452	-0.016782	10	10	P1P2	0.64441	0.0328007	10	10	P1P2	0.51391	-0.0164102	10	10
ARHGEF1	P2	0.488063	-0.0616579	10	10	P2	0.271972	0.243312	10	10	P1	0.611484	0.00868997	9	9
ARHGEF10	P1P2	0.352885	0.0238184	10	10	P1P2	0.377173	0.11699	10	10	P1P2	0.32997	0.0745267	10	10
ARHGEF10L	P1P2	0.0211829	-0.184689	10	10	P1P2	0.971751	-0.0568048	10	10	P1P2	0.117695	-0.133123	10	10
ARHGEF11	P1P2	0.288572	0.0284816	8	8	P1P2	0.71213	-0.176222	9	9	P1P2	0.412669	0.0106224	8	8
ARHGEF12	P1P2	0.92158	0.0334447	10	10	P1P2	0.622021	0.0445946	10	10	P1P2	0.893268	-0.047206	10	10
ARHGEF15	P1P2	0.217057	-0.155717	10	10	P1P2	0.513752	-0.108044	10	10	P1P2	0.0658588	-0.0454323	10	10
ARHGEF16	P1P2	0.061732	0.0715709	10	10	P1P2	0.813128	-0.0670107	9	9	P1P2	0.478743	0.0282495	9	9
ARHGEF17	P1P2	0.553225	-0.139769	9	9	P1P2	0.289051	-0.0373	9	9	P1P2	0.149575	-0.0397672	9	9
ARHGEF18	P1P2	0.916183	0.0185377	10	10	P1P2	0.340187	0.0765034	10	10	P1P2	0.475876	0.0373361	10	10
ARHGEF19	P1P2	0.636738	0.143742	10	10	P1P2	0.434116	0.228514	10	10	P1P2	0.124525	0.153097	10	10
ARHGEF2	P1P2	0.659778	0.0670641	9	9	P1P2	0.141801	0.074302	10	10	P1P2	0.207654	0.103034	9	9
ARHGEF25	P1P2	0.751086	-0.00492511	10	10	P1P2	0.359882	-0.0292851	10	10	P1P2	0.653602	0.0135509	10	10
ARHGEF26	P1P2	0.356882	-0.196331	10	10	P1P2	0.387984	-0.0763388	10	10	P1P2	0.203209	-0.161157	10	10
ARHGEF28	P1P2	0.750093	0.0358944	9	9	P1P2	0.153079	0.0903372	9	9	P1P2	0.182265	0.0602035	9	9
ARHGEF3	P1P2	0.0241863	-0.0335207	10	10	P1P2	0.691883	0.0539787	10	10	P1P2	0.20906	-0.0603482	10	10
ARHGEF33	ENST00000398800.4	0.903644	-0.0138594	10	10	ENST00000398800.4	0.312038	-0.0515163	10	10	ENST00000398800.4	0.329528	-0.00710442	10	10
ARHGEF35	ENST00000378115.2	0.160956	-0.0809861	10	10	ENST00000378115.2	0.625348	0.0932651	10	10	ENST00000378115.2	0.647197	-0.0329757	10	10
ARHGEF37	P2	0.120264	0.0657226	10	10	P2	0.0652097	0.23997	10	10	P2	0.035055	0.163594	10	10
ARHGEF38	P1P2	0.889377	0.101496	10	10	P1P2	0.536553	0.0163046	10	10	P1P2	0.885771	0.0602903	10	10
ARHGEF39	P1P2	0.909383	0.155332	10	10	P1P2	0.234594	-0.164881	10	10	P1P2	0.504208	-0.0309601	10	10
ARHGEF4	P1P2	0.181279	0.137756	10	10	P1P2	0.323353	0.170824	10	10	P1P2	0.826904	0.162021	10	10
ARHGEF40	P1P2	0.347397	0.00206806	10	10	P1P2	0.188419	-0.163362	10	10	P1P2	0.109708	-0.124636	10	10
ARHGEF5	P1P2	0.801252	0.0617969	10	10	P1P2	0.148122	-0.180903	10	10	P1P2	0.266371	-0.0635213	10	10
ARHGEF6	P1P2	0.564755	0.0397367	9	9	P1P2	0.693399	0.0234736	9	9	P1P2	0.570903	0.0222494	9	9
ARHGEF7	ENST00000370623.3	0.92158	-0.117212	10	10	ENST00000370623.3	0.728093	0.0471348	10	10	ENST00000370623.3	0.826904	-0.0626051	10	10
ARHGEF9	P1P2	0.625404	0.0518401	6	6	P1P2	0.835325	0.447973	8	8	P1P2	0.64787	-0.0413977	6	6
ARID1A	P1P2	0.932195	0.0324212	9	9	P1P2	0.0348554	0.307243	9	9	P1P2	0.102806	0.135445	9	9
ARID1B	P1	0.114413	-0.181983	8	8	P2	0.601818	-0.0604592	10	10	P1	0.0567569	-0.0964593	8	8
ARID2	P1P2	0.00592396	0.325266	9	9	P1P2	0.287328	0.285036	10	10	P1P2	0.0161286	0.286675	9	9
ARID3A	P1P2	0.101213	0.177637	8	8	P1P2	0.907385	0.0253505	9	9	P1P2	0.152526	0.100132	8	8
ARID3B	P1P2	0.109826	-0.0232332	9	9	P1P2	0.862868	0.046542	9	9	P1P2	0.375853	-0.00421284	9	9
ARID3C	P1P2	0.423473	0.0814951	10	10	P1P2	0.822577	0.0197583	10	10	P1P2	0.982376	0.0629693	10	10
ARID4A	P1P2	0.0392782	-0.0550093	10	10	P1P2	0.0394016	-0.212233	10	10	P1P2	0.00087519	-0.134089	10	10
ARID4B	P1P2	0.904698	0.0409701	10	10	P1P2	0.13166	0.0985776	9	9	P1P2	0.19198	0.0653488	9	9
ARID5A	P1P2	0.467168	-0.120773	10	10	P1P2	0.334784	0.099617	10	10	P1P2	0.874777	0.0502137	10	10
ARID5B	ENST00000279873.7	0.712281	-0.00998343	10	10	ENST00000279873.7	0.255771	-0.116874	10	10	ENST00000279873.7	0.166284	-0.0433627	10	10
ARIH1	P1P2	0.000137459	-0.372852	9	9	P1P2	0.00216168	-0.235852	9	9	P1P2	2.96e-05	-0.26976	9	9
ARIH2	P1P2	0.594184	0.0542415	9	9	P1P2	0.445074	0.0559783	10	10	P1P2	0.601219	0.024219	9	9
ARIH2OS	P1P2	0.0546591	0.191405	10	10	P1P2	0.558665	0.0573707	10	10	P1P2	0.470753	0.0793477	10	10
ARL1	P1P2	0.475905	-0.0724111	10	10	P1P2	0.696876	-0.0297203	10	10	P1P2	0.877114	-0.0480812	10	10
ARL10	P1P2	0.584542	0.0742712	10	10	P1P2	0.775481	0.0558535	10	10	P1P2	0.678821	0.0476379	10	10
ARL11	P1P2	0.386387	-0.115285	10	10	P1P2	0.79854	0.0662374	10	10	P1P2	0.64358	-0.0278953	10	10
ARL13A	P1P2	0.629897	0.0157999	10	10	P1P2	0.146645	-0.173979	10	10	P1P2	0.10697	-0.0863964	10	10
ARL13B	P1P2	0.66914	-0.0653878	10	10	P1P2	0.296681	0.144357	10	10	P1P2	0.560837	0.0193012	10	10
ARL14	P1P2	0.186449	-0.0197843	10	10	P1P2	0.240253	-0.120439	10	10	P1P2	0.118183	-0.0406216	10	10
ARL14EP	P1P2	0.591467	0.0940039	10	10	P1P2	0.312178	-0.208343	10	10	P1P2	0.638487	-0.0797772	10	10
ARL14EPL	ENST00000601302.2	0.997523	-0.0126594	10	10	ENST00000601302.2	0.703626	-0.121346	10	10	ENST00000601302.2	0.847287	-0.0377011	10	10
ARL15	P1P2	0.495792	-0.0596262	10	10	P1P2	0.691233	-0.00373046	10	10	P1P2	0.40332	-0.0294681	10	10
ARL16	P1P2	0.36153	0.0177067	10	10	P1P2	0.549316	0.0913596	10	10	P1P2	0.870339	0.0312147	10	10
ARL17A	ENST00000329240.4,ENST00000336125.5,ENST00000445552.2	0.330011	0.0217368	10	10	ENST00000329240.4,ENST00000336125.5,ENST00000445552.2	0.351616	-0.115953	10	10	ENST00000329240.4,ENST00000336125.5,ENST00000445552.2	0.781259	-0.0674397	10	10
ARL17B	ENST00000434041.2,ENST00000450673.3,ENST00000570618.1	0.330011	0.0217368	10	10	ENST00000434041.2,ENST00000450673.3,ENST00000570618.1	0.351616	-0.115953	10	10	ENST00000434041.2,ENST00000450673.3,ENST00000570618.1	0.781259	-0.0674397	10	10
ARL2	P1P2	0.00588461	0.178933	9	9	P1P2	0.865913	0.0136814	9	9	P1P2	0.0781118	0.116029	9	9
ARL2BP	P1P2	0.742913	0.0209984	10	10	P1P2	0.415698	0.0393433	10	10	P1P2	0.599813	-0.0110487	10	10
ARL3	P1P2	0.595479	-0.0173208	9	9	P1P2	0.137347	-0.101059	9	9	P1P2	0.12684	-0.0295083	9	9
ARL4A	P1P2	0.212305	-0.0449259	10	10	P1P2	0.673872	-0.0529264	10	10	P1P2	0.781259	0.0459226	10	10
ARL4C	P1P2	0.633156	0.0283465	10	10	P1P2	0.945057	-0.058095	10	10	P1P2	0.946927	-0.00299806	10	10
ARL4D	P1P2	0.88424	0.0871429	10	10	P1P2	0.918658	0.0420341	10	10	P1P2	0.86544	0.056296	10	10
ARL5A	P1P2	0.33325	0.0582366	10	10	P1P2	0.353518	-0.189043	10	10	P1P2	0.87992	-0.0374996	10	10
ARL5B	P1P2	0.272281	0.081009	9	9	P1P2	0.506725	0.0108915	9	9	P1P2	0.217632	0.0384166	9	9
ARL5C	P1P2	0.671294	-0.0658323	10	10	P1P2	0.190849	-0.0186005	10	10	P1P2	0.154539	-0.0382585	10	10
ARL6	P1P2	0.0193048	-0.238755	10	10	P1P2	0.902232	-0.0460598	10	10	P1P2	0.0942022	-0.152157	10	10
ARL6IP1	P1	0.0290097	-0.157274	10	10	P1	0.0863004	-0.12749	10	10	P1	0.00328821	-0.107665	10	10
ARL6IP4	P1P2	0.494017	0.0789335	10	10	P1P2	0.174501	-0.165736	10	10	P1P2	0.5745	-0.0338062	10	10
ARL6IP5	P1P2	0.635684	-0.0182493	10	10	P1P2	0.369678	-0.0647019	10	10	P1P2	0.340228	-0.0445161	10	10
ARL6IP6	P1P2	0.0161234	-0.0598549	10	10	P1P2	0.0226094	-0.20068	9	9	P1P2	0.00183008	-0.122293	9	9
ARL8A	P1P2	0.890779	0.0874129	10	10	P1P2	0.0552013	0.0700299	10	10	P1P2	0.120363	0.120845	10	10
ARL8B	P1P2	0.378415	0.0521255	10	10	P1P2	0.00540188	-0.168935	10	10	P1P2	0.140778	-0.0555035	10	10
ARL9	P1P2	0.223174	0.0362375	10	10	P1P2	0.055164	0.146251	10	10	P1P2	0.0245403	0.103324	10	10
ARMC1	P1P2	0.179213	0.0508033	10	10	P1P2	0.946812	0.235683	10	10	P1P2	0.404489	0.159585	10	10
ARMC10	P1P2	0.834595	-0.0293039	9	9	P1P2	0.880802	-0.216377	9	9	P1P2	0.792156	-0.0735472	9	9
ARMC12	P1P2	0.387929	0.0851358	10	10	P1P2	0.866851	0.0670517	10	10	P1P2	0.976227	0.0850205	10	10
ARMC2	P1P2	0.316044	-0.0579486	10	10	P1P2	0.471699	-0.0393064	10	10	P1P2	0.815374	-0.0223898	10	10
ARMC3	P1P2	0.266471	-0.0988187	9	9	P1P2	0.677458	-0.0588396	9	9	P1P2	0.20867	-0.06625	9	9
ARMC4	P1P2	0.0352004	-0.0727244	9	9	P1P2	0.594675	-0.0570567	10	10	P1P2	0.146162	-0.0389112	9	9
ARMC5	P1P2	0.997877	-0.00151233	10	10	P1P2	0.571082	0.0264832	10	10	P1P2	0.540249	-0.0457321	10	10
ARMC6	P1P2	0.525617	-0.0802716	10	10	P1P2	0.331774	0.0460352	10	10	P1P2	0.283178	-0.0509127	10	10
ARMC7	P1P2	0.454944	-0.0147129	10	10	P1P2	0.923675	-0.0554555	10	10	P1P2	0.927588	0.0339024	10	10
ARMC8	P1P2	0.856543	-0.00367329	10	10	P1P2	0.064421	-0.136855	10	10	P1P2	0.124379	-0.0789746	10	10
ARMC9	P1P2	0.516306	0.0305933	10	10	P1P2	0.342723	0.0104849	10	10	P1P2	0.389615	0.0347272	10	10
ARMCX1	P1P2	0.419886	-0.0197685	10	10	P1P2	0.232633	-0.117218	10	10	P1P2	0.219119	-0.0642163	10	10
ARMCX2	P1P2	0.288527	0.131578	9	9	P1P2	0.973554	0.152997	9	9	P1P2	0.433791	0.0823823	9	9
ARMCX3	P1P2	0.00833895	-0.140691	10	10	P1P2	0.608794	-0.0816462	10	10	P1P2	0.0135317	-0.0909019	10	10
ARMCX4	P1P2	0.544786	0.0528495	10	10	P1P2	0.683017	-0.139664	10	10	P1P2	0.529323	-0.0263074	10	10
ARMCX5	P1P2	0.816486	-0.0592516	10	10	P1P2	0.762679	-0.0494303	10	10	P1P2	0.836387	-0.0581579	10	10
ARMCX5-GPRASP2	P1P2	0.816486	-0.0592516	10	10	P1P2	0.762679	-0.0494303	10	10	P1P2	0.836387	-0.0581579	10	10
ARMCX6	P1P2	0.98856	-0.00452859	10	10	P1P2	0.74271	0.0494919	10	10	P1P2	0.844501	0.0299251	10	10
ARMS2	P1P2	0.669852	-0.0475477	9	9	P1P2	0.436867	0.0534963	9	9	P1P2	0.560961	0.0406427	9	9
ARNT	P1P2	0.64828	0.01324	10	10	P1P2	0.374559	-0.0386068	10	10	P1P2	0.287859	-0.0477744	10	10
ARNT2	P1P2	0.844841	-0.0511679	10	10	P1P2	0.341304	-0.0723989	10	10	P1P2	0.527577	-0.069467	10	10
ARNTL	P1P2	0.536375	0.0430985	10	10	P1P2	0.699159	-0.059148	10	10	P1P2	0.926646	-0.0367986	10	10
ARNTL2	P1P2	0.315428	0.0144187	8	8	P1P2	0.590895	0.0248615	9	9	P1P2	0.738068	0.0425762	8	8
ARPC1A	P1P2	0.457715	0.0337118	10	10	P1P2	0.424252	0.156747	10	10	P1P2	0.375877	0.105585	10	10
ARPC1B	P1P2	0.330939	0.0908284	9	9	P1P2	0.271932	-0.0357935	9	9	P1P2	0.729551	0.0168175	9	9
ARPC2	P1	0.130763	-0.202099	10	10	P2	0.659128	0.108856	10	10	P2	0.143193	0.0712413	10	10
ARPC3	P1	0.182247	-0.153651	10	10	P2	0.15877	-0.00485684	9	9	P2	0.149752	0.019702	9	9
ARPC4	P1P2	0.102615	0.136547	10	10	P1P2	0.462787	0.0945248	10	10	P1P2	0.0732849	0.0873223	10	10
ARPC4-TTLL3	P1	0.305462	0.0533119	10	10	P2	0.0990025	0.0924527	10	10	P2	0.102279	0.127513	10	10
ARPC5	P1P2	0.871624	0.0257329	9	9	P1P2	0.0418295	-0.183301	9	9	P1P2	0.0558629	-0.0913886	9	9
ARPC5L	P2	0.661358	0.075654	9	9	P2	0.408912	0.129342	10	10	P2	0.571752	0.0338286	9	9
ARPP19	P1P2	0.0382194	-0.204035	10	10	P1P2	0.648843	0.196187	10	10	P1P2	0.301936	-0.0261245	10	10
ARPP21	ENST00000187397.4	0.19737	0.108392	10	10	ENST00000187397.4	0.621191	-0.055007	10	10	ENST00000187397.4	0.594464	0.00777557	10	10
ARR3	P1P2	0.873864	0.0359853	10	10	P1P2	0.850465	0.0426128	10	10	P1P2	0.895379	0.0250968	10	10
ARRB1	P1P2	0.468618	0.160591	10	10	P1P2	0.367643	0.228784	10	10	P1P2	0.113714	0.130966	10	10
ARRB2	P1P2	0.978372	-0.030539	8	8	P1P2	0.00767031	0.281306	10	10	P1P2	0.0732757	0.0944447	8	8
ARRDC1	P1P2	0.76991	0.126268	9	9	P1P2	0.665843	-0.0629294	10	10	P1P2	0.845105	0.0437026	9	9
ARRDC2	P2	0.0381231	-0.19355	10	10	P2	0.672156	-0.00727017	10	10	P2	0.163936	-0.0725876	10	10
ARRDC3	P1P2	0.487506	-0.0601932	10	10	P1P2	0.420598	0.0615164	10	10	P1P2	0.621005	-0.0107659	10	10
ARRDC4	P1P2	0.747258	-0.0417008	9	9	P1P2	0.0762628	-0.132437	9	9	P1P2	0.112794	-0.0874812	9	9
ARRDC5	P1P2	0.283082	-0.0502363	10	10	P1P2	0.861421	0.0353076	10	10	P1P2	0.269188	-0.0138023	10	10
ARSA	P1P2	0.150202	0.0883695	10	10	P1P2	0.714781	0.034162	10	10	P1P2	0.209814	0.092347	10	10
ARSB	P1P2	0.274228	0.16511	10	10	P1P2	0.945525	-0.155957	10	10	P1P2	0.944095	0.114057	10	10
ARSD	P1P2	0.883657	0.0928984	10	10	P1P2	0.482168	0.0262912	10	10	P1P2	0.318618	0.0193214	10	10
ARSE	P1P2	0.60244	-0.0495644	10	10	P1P2	0.818235	0.0655688	10	10	P1P2	0.999409	-0.0319561	10	10
ARSF	P1P2	0.927568	0.00124755	10	10	P1P2	0.584437	-0.0694878	10	10	P1P2	0.311902	-0.00280872	10	10
ARSG	ENST00000448504.2	0.190873	0.0995902	10	10	ENST00000448504.2	0.742266	0.0328057	10	10	ENST00000448504.2	0.987344	0.106107	10	10
ARSH	ENST00000381130.2	0.839984	-0.00309775	10	10	ENST00000381130.2	0.285137	-0.0354795	10	10	ENST00000381130.2	0.407169	0.00675783	10	10
ARSI	P1P2	0.955914	-0.000676465	10	10	P1P2	0.573682	0.0205022	10	10	P1P2	0.928531	0.07014	10	10
ARSJ	P1P2	0.536667	0.0539323	10	10	P1P2	0.438185	0.221697	10	10	P1P2	0.752282	0.0897778	10	10
ARSK	P1P2	0.708318	-0.0604864	10	10	P1P2	0.426984	-0.0627263	10	10	P1P2	0.704845	-0.0771555	10	10
ART1	P1P2	0.166365	-0.00498629	10	10	P1P2	0.365849	0.0485776	10	10	P1P2	0.508572	0.0326599	10	10
ART3	P1	0.863531	0.01972	9	9	P2	0.256818	0.172253	10	10	P2	0.348244	0.0966888	10	10
ART4	P1P2	0.526871	-0.0626782	10	10	P1P2	0.278371	0.00264251	10	10	P1P2	0.431236	-0.0202002	10	10
ART5	P1P2	0.188279	-0.0331777	10	10	P1P2	0.727652	-0.00260238	10	10	P1P2	0.497419	-0.0269066	10	10
ARTN	P1	0.28421	0.0508509	10	10	P1	0.668943	-0.0748306	10	10	P1	0.913464	0.0326576	10	10
ARV1	P1P2	0.668279	-0.0314981	10	10	P1P2	0.830965	-0.0860862	8	8	P1P2	0.792458	0.0156569	8	8
ARVCF	P1	0.0755026	0.0693681	9	9	P2	0.410164	-0.00311827	10	10	P2	0.173758	0.0346297	10	10
ARX	P1	0.765484	0.011348	10	10	P2	0.301331	0.127252	10	10	P1	0.688183	0.0419523	10	10
AS3MT	P1P2	0.773618	-0.0588115	10	10	P1P2	0.373927	0.136036	10	10	P1P2	0.512	0.0384899	10	10
ASAH1	P1P2	0.703431	0.00328725	9	9	P1P2	0.198228	0.0421081	10	10	P1P2	0.483804	0.0127025	9	9
ASAH2	ENST00000395526.4	0.937439	-0.0301292	10	10	ENST00000395526.4	0.911197	0.0730427	10	10	ENST00000395526.4	0.959681	0.0464039	10	10
ASAH2B	P1P2	0.898939	-0.101123	9	9	P1P2	0.14292	0.124512	10	10	P1P2	0.168817	0.0116945	9	9
ASAP1	P1P2	0.233466	-0.140465	9	9	P1P2	0.0971352	-0.306873	8	8	P1P2	0.0389537	-0.165627	8	8
ASAP2	P1P2	0.527161	0.0298733	10	10	P1P2	0.603968	0.0472696	10	10	P1P2	0.98143	0.0274466	10	10
ASAP3	P1P2	0.505613	0.139277	8	8	P1P2	0.171017	0.0316237	9	9	P1P2	0.236035	0.10039	8	8
ASB1	P1P2	0.764356	-0.0075294	10	10	P1P2	0.738049	-0.0585108	10	10	P1P2	0.746661	-0.0285616	10	10
ASB10	P1P2	0.82787	0.0735757	10	10	P1P2	0.422749	0.166712	9	9	P1P2	0.857358	0.114131	9	9
ASB11	P2	0.286075	0.126627	10	10	P2	0.260286	0.0752166	10	10	P2	0.194403	0.116863	10	10
ASB12	ENST00000362002.2	0.465269	0.0353639	10	10	ENST00000362002.2	0.385887	-0.0709025	10	10	ENST00000362002.2	0.357928	0.022783	10	10
ASB13	P1P2	0.41844	0.0116164	10	10	P1P2	0.548043	-0.0298793	10	10	P1P2	0.377958	-0.0378335	10	10
ASB14	P1P2	0.928273	0.00840608	10	10	P1P2	0.169245	0.224398	10	10	P1P2	0.22001	0.0612714	10	10
ASB15	P1P2	0.192633	-0.0927706	10	10	P1P2	0.90037	0.0127875	10	10	P1P2	0.338728	-0.0473423	10	10
ASB16	P1P2	0.628952	0.00905751	10	10	P1P2	0.112954	0.106182	10	10	P1P2	0.121785	0.0763158	10	10
ASB17	P1P2	0.945437	0.0325784	10	10	P1P2	0.573481	0.0876212	10	10	P1P2	0.779438	0.0418004	10	10
ASB18	P1P2	0.616309	-0.00511255	10	10	P1P2	0.681292	0.0375304	10	10	P1P2	0.960389	0.0452254	10	10
ASB2	P1P2	0.318235	-0.140248	9	9	P1P2	0.030611	0.162164	10	10	P1P2	0.436181	0.0206426	9	9
ASB3	P1P2	0.693856	-0.0122041	10	10	P1P2	0.292215	0.12005	10	10	P1P2	0.329381	0.0734203	10	10
ASB4	P1P2	0.824762	0.12228	10	10	P1P2	0.835749	0.0214408	10	10	P1P2	0.900072	0.103487	10	10
ASB5	P1P2	0.431589	-0.0113086	9	9	P1P2	0.292801	0.0192363	9	9	P1P2	0.809551	0.016915	9	9
ASB6	P1P2	0.178496	0.107327	10	10	P1P2	0.805129	-0.0977855	10	10	P1P2	0.574096	0.00980081	10	10
ASB7	P1P2	0.839522	-0.0211503	10	10	P1P2	0.0599727	-0.210002	10	10	P1P2	0.122215	-0.0717918	10	10
ASB8	P1P2	0.104429	-0.11569	9	9	P1P2	0.342867	0.0549485	9	9	P1P2	0.911889	-0.0363178	9	9
ASB9	P1P2	0.626016	-0.00375269	10	10	P1P2	0.0500951	0.138059	9	9	P1P2	0.347883	0.0222082	9	9
ASCC1	P1P2	0.83277	-0.116723	9	9	P1P2	0.311124	-0.0461156	10	10	P1P2	0.601437	-0.0327387	9	9
ASCC2	P1P2	0.210195	0.0364996	9	9	P1P2	0.256169	0.233015	9	9	P1P2	0.119618	0.124314	9	9
ASCC3	P1P2	0.0280783	0.267563	5	5	P1P2	0.267442	-0.0860341	5	5	P1P2	0.324582	0.0869671	4	4
ASCL1	P1P2	0.540279	-0.0330714	10	10	P1P2	0.949268	-0.00134447	10	10	P1P2	0.602082	-0.0493557	10	10
ASCL2	P1P2	0.584237	-0.257912	10	10	P1P2	0.511954	0.0480012	10	10	P1P2	0.345508	-0.0917516	10	10
ASCL3	P1P2	0.284609	-0.12141	10	10	P1P2	0.591625	-0.0910098	10	10	P1P2	0.24505	-0.0742984	10	10
ASCL4	ENST00000342331.4	0.320962	0.0641202	9	9	ENST00000342331.4	0.503162	-0.249613	9	9	ENST00000342331.4	0.516179	-0.0230418	9	9
ASCL5	P1P2	0.478653	0.0698988	10	10	P1P2	0.102354	-0.294102	10	10	P1P2	0.434715	-0.0779786	10	10
ASF1A	P1P2	0.0387406	-0.131429	9	9	P1P2	0.59661	-0.171203	10	10	P1P2	0.581355	-0.048779	9	9
ASF1B	P1P2	0.664839	0.0458948	10	10	P1P2	0.316702	0.0377508	10	10	P1P2	0.802507	0.0170885	10	10
ASGR1	P1P2	0.836288	-0.0505361	10	10	P1P2	0.300301	0.0628958	10	10	P1P2	0.453424	-0.0236249	10	10
ASGR2	P1P2	0.299858	-0.046986	9	9	P1P2	0.826737	-0.0517301	9	9	P1P2	0.381269	-0.0370804	9	9
ASH1L	P1P2	0.284809	-0.12645	10	10	P1P2	0.205339	-0.237176	10	10	P1P2	0.0599057	-0.155033	10	10
ASH2L	P1P2	0.991295	0.00426074	8	8	P1P2	0.32795	-0.122291	8	8	P1P2	0.353768	-0.0419388	8	8
ASIC1	P1P2	0.0913007	0.0329794	9	9	P1P2	0.257729	-0.010031	9	9	P1P2	0.812217	0.0593641	9	9
ASIC2	ENST00000359872.6	0.666128	-0.0307994	10	10	ENST00000359872.6	0.137781	-0.144515	10	10	ENST00000359872.6	0.329087	-0.045469	10	10
ASIC3	P1P2	0.93932	-0.0952093	10	10	P1P2	0.119683	0.250179	10	10	P1P2	0.530099	0.0736332	10	10
ASIC4	P1P2	0.314247	-0.0812376	9	9	P1P2	0.116303	-0.0894079	9	9	P1P2	0.0380481	-0.0824786	9	9
ASIC5	P1P2	0.260272	-0.0381235	10	10	P1P2	0.575484	-0.0792559	10	10	P1P2	0.302214	-0.0961376	10	10
ASIP	P1P2	0.239121	-0.192958	10	10	P1P2	0.547358	0.171406	10	10	P1P2	0.52024	-0.0574835	10	10
ASL	P1P2	0.343467	0.0868997	10	10	P1P2	0.742488	-0.00313415	10	10	P1P2	0.490491	0.0514158	10	10
ASMT	P1P2	0.985023	-0.0253594	10	10	P1P2	0.95711	0.188232	10	10	P1P2	0.797238	0.0322447	10	10
ASMTL	P1P2	0.0697708	0.115063	9	9	P1P2	0.271189	0.137428	9	9	P1P2	0.0411066	0.0958646	9	9
ASNA1	P1P2	0.805389	-0.0135645	7	7	P1P2	0.019855	0.306593	9	9	P1P2	0.280335	0.0950634	7	7
ASNS	P1P2	0.138937	0.122903	10	10	P1P2	0.376777	-0.055461	10	10	P1P2	0.908997	0.0474686	10	10
ASNSD1	P1P2	0.334283	-0.115705	9	9	P1P2	0.650021	0.104285	9	9	P1P2	0.993017	0.0218825	9	9
ASPA	P1P2	0.942026	0.0733732	10	10	P1P2	0.593047	-0.0891527	10	10	P1P2	0.732335	-0.0318711	10	10
ASPDH	P1P2	0.80949	-0.0541229	10	10	P1P2	0.33685	0.160466	10	10	P1P2	0.388309	0.0353695	10	10
ASPG	P2	0.471343	-0.034452	10	10	P1	0.468177	0.185947	10	10	P2	0.357308	0.00383462	10	10
ASPH	P1P2	0.57907	0.0378266	10	10	P1P2	0.364993	-0.104856	10	10	P1P2	0.218785	-0.0231658	10	10
ASPHD1	P1P2	0.089325	-0.105294	10	10	P1P2	0.872635	0.0688375	10	10	P1P2	0.608707	-0.0101435	10	10
ASPHD2	P1P2	0.333114	0.0455657	9	9	P1P2	0.0489456	-0.0235716	9	9	P1P2	0.242875	-0.0108713	9	9
ASPM	P1P2	0.106069	-0.0756088	9	9	P1P2	0.714233	-0.155935	10	10	P1P2	0.641613	-0.0706867	9	9
ASPN	P1P2	0.274099	-0.101607	10	10	P1P2	0.341006	0.161451	10	10	P1P2	0.686655	0.0194747	10	10
ASPRV1	ENST00000320256.4	0.442025	-0.118433	10	10	ENST00000320256.4	0.620257	0.0128617	10	10	ENST00000320256.4	0.931359	-0.00428895	10	10
ASPSCR1	P1P2	0.893116	-0.0340073	10	10	P1P2	0.162599	0.11459	10	10	P1P2	0.380208	0.0693766	10	10
ASRGL1	P1P2	0.646581	-0.0397071	10	10	P1P2	0.157962	-0.1801	10	10	P1P2	0.439438	-0.128031	10	10
ASS1	P1P2	0.880041	-0.043036	10	10	P1P2	0.563616	-0.036452	10	10	P1P2	0.601463	0.0145144	10	10
ASTE1	P1P2	0.89335	-0.0425053	10	10	P1P2	0.296477	0.0822478	10	10	P1P2	0.539269	0.0269147	10	10
ASTL	ENST00000342380.2	0.260961	-0.0565995	10	10	ENST00000342380.2	0.195526	0.105996	10	10	ENST00000342380.2	0.586073	0.0246983	10	10
ASTN1	P1P2	0.99316	-0.0274012	10	10	P1P2	0.956291	0.0216691	10	10	P1P2	0.863574	-0.00402323	10	10
ASTN2	P1P2	0.779169	-0.0441268	10	10	P1P2	0.0517498	0.167108	9	9	P1P2	0.205184	0.0424383	9	9
ASUN	P1P2	0.00247417	-0.189678	10	10	P1P2	0.206445	0.206498	10	10	P1P2	0.751157	0.0303843	10	10
ASXL1	P1P2	0.883307	-0.00335504	10	10	P1P2	0.268334	-0.098256	10	10	P1P2	0.562236	-0.0744499	10	10
ASXL2	P1P2	0.652683	0.0497944	9	9	P1P2	0.432219	0.0240371	10	10	P1P2	0.51719	-0.0336805	9	9
ASXL3	P1P2	0.29294	0.0954788	10	10	P1P2	0.364682	-0.102156	10	10	P1P2	0.929709	-0.00179397	10	10
ASZ1	P1P2	0.601102	0.0339843	10	10	P1P2	0.874371	0.0182688	10	10	P1P2	0.988526	0.0545138	10	10
ATAD1	P1P2	0.0144384	-0.0734406	10	10	P1P2	0.518405	-0.112639	10	10	P1P2	0.0888478	-0.109943	10	10
ATAD2	P1P2	0.48095	0.0359245	10	10	P1P2	0.46449	-0.030664	10	10	P1P2	0.948344	-0.0254225	10	10
ATAD2B	P1P2	0.302195	-0.101762	10	10	P1P2	0.297839	-0.0905845	10	10	P1P2	0.0157907	-0.0126032	10	10
ATAD3A	P1P2	0.73888	-0.080139	7	7	P1P2	0.663413	0.036008	7	7	P1P2	0.640299	-0.0566076	7	7
ATAD3B	P1	0.551766	0.0805606	9	9	P1	0.591002	-0.0152104	9	9	P1	0.858585	-0.000974949	9	9
ATAD3C	P1P2	0.224601	-0.0375594	9	9	P1P2	0.313751	-0.0231889	9	9	P1P2	0.141618	-0.0664122	9	9
ATAD5	P1P2	0.0144384	-0.216803	10	10	P1P2	0.107469	0.0121173	9	9	P1P2	0.314008	-0.118857	9	9
ATAT1	P1P2	0.668494	0.0385879	10	10	P1P2	0.709414	-0.0121027	10	10	P1P2	0.844501	-0.0176655	10	10
ATCAY	P1P2	0.0254309	0.20008	10	10	P1P2	0.540045	0.0789046	10	10	P1P2	0.383921	0.167973	10	10
ATE1	P1P2	0.48797	0.00751421	10	10	P1P2	0.894324	-0.0199939	10	10	P1P2	0.603529	0.00716295	10	10
ATF1	P1P2	0.0274379	-0.0441477	10	10	P1P2	0.32682	-0.0219937	10	10	P1P2	0.0464921	-0.0335519	10	10
ATF2	P1P2	0.593752	0.0346572	9	9	P1P2	0.376322	0.127308	9	9	P1P2	0.519417	0.113508	9	9
ATF3	P1P2	0.838611	-0.0163722	9	9	P1P2	0.411	0.0667409	10	10	P1P2	0.445074	0.0125516	9	9
ATF4	P1P2	0.701402	-0.153383	10	10	P1P2	0.141841	-0.0518748	10	10	P1P2	0.0903037	-0.0455744	10	10
ATF5	P1P2	0.330962	-0.0580135	3	3	P1P2	0.217526	-0.121928	2	2	P1P2	0.0200875	-0.178651	2	2
ATF6	P1P2	0.397093	0.0503854	10	10	P1P2	0.406499	-0.105308	10	10	P1P2	0.705065	-0.0244652	10	10
ATF6B	P1P2	0.10396	0.0891302	10	10	P1P2	0.135419	0.164746	10	10	P1P2	0.0100063	0.0953618	10	10
ATF7	P1P2	0.279846	0.0372264	10	10	P1P2	0.909566	-0.0570426	10	10	P1P2	0.410533	-0.0304886	10	10
ATF7IP	P2	0.0919456	0.0976976	10	10	P2	0.269033	0.0927351	10	10	P2	0.0629918	0.0611691	10	10
ATF7IP2	P1P2	0.902517	-0.0365984	9	9	P1P2	0.59443	0.133753	9	9	P1P2	0.210373	0.0151928	9	9
ATG10	P1P2	0.816601	-0.0374193	10	10	P1P2	0.256756	0.0161528	10	10	P1P2	0.663687	0.0427474	10	10
ATG12	P1P2	0.110172	-0.0421352	10	10	P1P2	0.273707	0.0696285	10	10	P1P2	0.470024	0.0735978	10	10
ATG13	P1P2	0.57483	-0.0426446	10	10	P1P2	0.225242	-0.0540583	10	10	P1P2	0.168748	-0.0775001	10	10
ATG14	P1P2	0.541257	0.0600035	10	10	P1P2	0.48768	0.0396997	10	10	P1P2	0.353757	0.0839697	10	10
ATG16L1	P1P2	0.230273	-0.054118	10	10	P1P2	0.193051	-0.107321	10	10	P1P2	0.0528622	-0.0582495	10	10
ATG16L2	P1P2	0.208323	0.136261	10	10	P1P2	0.44995	0.0768718	9	9	P1P2	0.376022	0.11196	9	9
ATG2A	P1P2	0.462498	0.016669	9	9	P1P2	0.637582	0.0817061	9	9	P1P2	0.616975	0.00993484	9	9
ATG2B	P1P2	0.848198	-0.0325217	10	10	P1P2	0.758426	-0.0361753	10	10	P1P2	0.6085	-0.0151483	10	10
ATG3	P1P2	0.846345	0.0831025	10	10	P1P2	0.482077	0.111028	10	10	P1P2	0.331444	0.102047	10	10
ATG4A	P1P2	0.102553	-0.0855552	10	10	P1P2	0.418651	-0.0228206	10	10	P1P2	0.111763	-0.0726601	10	10
ATG4B	P1P2	0.0643299	-0.266845	10	10	P1P2	0.156411	-0.181785	10	10	P1P2	0.0286425	-0.191372	10	10
ATG4C	P1P2	0.111196	-0.183074	10	10	P1P2	0.0719738	0.207658	9	9	P1P2	0.33629	0.0759445	9	9
ATG4D	P1P2	0.15371	-0.105563	10	10	P1P2	0.338776	0.0184469	10	10	P1P2	0.986397	-0.0206808	10	10
ATG5	P1P2	0.606978	-0.137799	10	10	P1P2	0.0833528	0.207162	10	10	P1P2	0.362442	0.0446395	10	10
ATG7	P1P2	0.514493	0.119784	10	10	P1P2	0.754069	0.107681	10	10	P1P2	0.347787	0.148245	10	10
ATG9A	P1P2	0.344673	0.0333506	10	10	P1P2	0.883526	0.0334836	10	10	P1P2	0.373484	0.00589365	10	10
ATG9B	P1P2	0.397505	0.0347527	10	10	P1P2	0.762567	-0.0698804	10	10	P1P2	0.984269	0.0128349	10	10
ATHL1	P1P2	0.240954	-0.10034	10	10	P1P2	0.614875	0.0746056	10	10	P1P2	0.961807	-0.0411795	10	10
ATIC	P1P2	0.491658	-0.0250869	4	4	P1P2	0.94537	-0.100265	7	7	P1P2	0.600048	0.0266722	4	4
ATL1	P1P2	0.418865	0.038642	10	10	P1P2	0.286929	-0.0868666	10	10	P1P2	0.703304	-0.0729974	10	10
ATL2	P1P2	0.164876	0.119099	10	10	P1P2	0.332022	0.0830028	9	9	P1P2	0.169787	0.108488	9	9
ATL3	P1P2	0.676367	-0.0413175	10	10	P1P2	0.82372	-0.0370275	10	10	P1P2	0.513146	-0.00928535	10	10
ATM	P1P2	0.817404	-0.0386614	10	10	P1P2	0.905723	0.063667	10	10	P1P2	0.818368	-0.00979275	10	10
ATMIN	P1P2	0.523017	-0.0549309	10	10	P1P2	0.406895	0.095816	8	8	P1P2	0.898546	0.0112053	8	8
ATN1	P1P2	0.364031	-0.0361518	9	9	P1P2	0.604985	0.0265505	9	9	P1P2	0.465837	0.0269317	9	9
ATOH1	P1P2	0.345428	-0.115	10	10	P1P2	0.889561	0.330627	10	10	P1P2	0.642305	0.0306705	10	10
ATOH7	P1P2	0.793493	0.040003	10	10	P1P2	0.909333	0.00339103	10	10	P1P2	0.838008	0.0429806	10	10
ATOH8	P1P2	0.165523	-0.0970808	9	9	P1P2	0.0597091	-0.0602969	9	9	P1P2	0.00463863	-0.0778055	9	9
ATOX1	P1P2	0.878863	-0.032776	8	8	P1P2	0.824324	0.120238	9	9	P1P2	0.628648	-0.0377505	8	8
ATP10A	P1P2	0.505898	-0.0440253	9	9	P1P2	0.845368	0.0100671	9	9	P1P2	0.503734	-0.0336301	9	9
ATP10B	P1P2	0.0829441	-0.11764	10	10	P1P2	0.918074	0.108798	9	9	P1P2	0.590601	0.0407453	9	9
ATP10D	P1P2	0.298697	0.0552658	9	9	P1P2	0.258733	0.20774	10	10	P1P2	0.383142	0.119484	9	9
ATP11A	P1P2	0.237031	-0.165528	9	9	P1P2	0.125847	-0.200816	10	10	P1P2	0.12277	-0.110012	9	9
ATP11B	P1P2	0.108069	0.018907	8	8	P1P2	0.926439	-0.152361	9	9	P1P2	0.181605	0.00887061	8	8
ATP11C	ENST00000361648.2	0.596378	0.0172378	10	10	ENST00000361648.2	0.149653	-0.126769	10	10	ENST00000361648.2	0.269445	-0.0623128	10	10
ATP12A	P1P2	0.257144	0.034203	8	8	P1P2	0.00963494	0.232692	10	10	P1P2	0.0264958	0.100789	8	8
ATP13A1	P1P2	0.736551	0.0396774	10	10	P1P2	0.968001	0.0573273	10	10	P1P2	0.858216	0.0329885	10	10
ATP13A2	P1P2	0.278795	-0.119717	10	10	P1P2	0.82372	-0.0690757	10	10	P1P2	0.483986	-0.0742455	10	10
ATP13A3	P1P2	0.463448	0.0427686	9	9	P1P2	0.569785	0.136695	10	10	P1P2	0.511343	0.00407542	9	9
ATP13A4	P1P2	0.28318	0.0605157	9	9	P1P2	0.0138902	0.535343	10	10	P1P2	0.0491335	0.105233	9	9
ATP13A5	P1P2	0.979363	-0.0436598	9	9	P1P2	0.859459	0.0567001	9	9	P1P2	0.896785	-0.0108834	9	9
ATP1A1	P1P2	0.150717	-0.131278	2	2	P1P2	0.934725	0.00549715	2	2	P1P2	0.130963	-0.0628904	2	2
ATP1A2	P1	0.172328	0.0209192	10	10	P2	0.0420951	0.162628	9	9	P2	0.306703	0.066849	9	9
ATP1A3	P1P2	0.205693	0.0372075	9	9	P1P2	0.830842	0.0836734	9	9	P1P2	0.482049	0.0452541	9	9
ATP1A4	P2	0.330966	0.00856533	10	10	P1	0.721812	0.020521	10	10	P1	0.519086	0.0316963	10	10
ATP1B1	P1P2	0.205875	-0.0714761	10	10	P1P2	0.630874	0.0400386	10	10	P1P2	0.234267	-0.0325192	10	10
ATP1B2	P1P2	0.67853	-0.016026	10	10	P1P2	0.665629	0.0719423	10	10	P1P2	0.713009	-0.019737	10	10
ATP1B3	P1P2	0.775882	0.0775353	10	10	P1P2	0.696659	0.043272	10	10	P1P2	0.480475	0.0368766	10	10
ATP1B4	P1P2	0.555836	-0.0431372	10	10	P1P2	0.634848	0.0695712	10	10	P1P2	0.868239	0.0135428	10	10
ATP2A1	P1P2	0.309737	-0.139575	10	10	P1P2	0.688202	-0.0598484	10	10	P1P2	0.550892	-0.0483967	10	10
ATP2A2	P1P2	0.906806	-0.166964	10	10	P1P2	0.0124844	0.255063	10	10	P1P2	0.139582	0.0460933	10	10
ATP2A3	P1P2	0.591059	0.0402804	9	9	P1P2	0.650021	-0.0468238	9	9	P1P2	0.94592	-0.0217673	9	9
ATP2B1	P1P2	0.697427	-0.000180456	9	9	P1P2	0.297517	-0.0786018	9	9	P1P2	0.171054	-0.00804758	9	9
ATP2B2	P2	0.080123	-0.156124	9	9	P2	0.5382	0.120167	10	10	P2	0.20174	-0.0936794	9	9
ATP2B3	P1P2	0.832041	-0.0248305	9	9	P1P2	0.71317	-0.0228964	9	9	P1P2	0.742038	-0.0246656	9	9
ATP2B4	P1P2	0.264236	0.0171479	10	10	P1P2	0.524802	-0.0289293	10	10	P1P2	0.144902	0.0155516	10	10
ATP2C1	P1P2	0.174	0.187772	9	9	P1P2	0.139284	0.238691	9	9	P1P2	0.0529232	0.187511	9	9
ATP2C2	P1P2	0.201511	0.140681	10	10	P1P2	0.061516	0.141824	9	9	P1P2	0.0214291	0.169455	9	9
ATP4A	P1	0.227187	-0.0713147	10	10	P1	0.551278	-0.0534274	10	10	P1	0.265989	-0.105221	10	10
ATP4B	P1P2	0.829598	-0.0578117	10	10	P1P2	0.2705	0.0898259	10	10	P1P2	0.340077	0.0258651	10	10
ATP5A1	P1	0.00200641	0.558358	7	7	P1	0.0967725	-0.0396802	7	7	P1	0.330451	0.298973	7	7
ATP5B	P1P2	0.858482	0.00958303	1	1	P1P2	0.102724	0.263889	2	2	P1P2	0.595176	0.0262252	1	1
ATP5C1	P1P2	0.717815	0.0240161	4	4	P1P2	0.00283463	-0.187348	7	7	P1P2	0.25471	-0.0332253	4	4
ATP5D	P1P2	0.565095	-0.00502301	10	10	P1P2	0.42289	0.0764359	10	10	P1P2	0.781259	0.0360029	10	10
ATP5E	P1P2	0.981526	-0.00620773	4	4	P1P2	0.26852	0.19333	5	5	P1P2	0.846532	0.016948	4	4
ATP5F1	P1P2	0.606188	-0.0293234	4	4	P1P2	0.0687674	-0.199122	4	4	P1P2	0.086488	-0.110075	4	4
ATP5G1	P1P2	0.856775	0.0216219	10	10	P1P2	0.859689	0.0654773	10	10	P1P2	0.774211	0.0361714	10	10
ATP5G2	P1P2	0.137211	0.118621	8	8	P1P2	0.408198	-0.121971	8	8	P1P2	0.70554	0.0137211	8	8
ATP5G3	P1P2	0.896753	-0.0530825	8	8	P1P2	0.0273352	0.1227	9	9	P1P2	0.562501	0.141821	8	8
ATP5H	P1P2	0.345399	0.081755	9	9	P1P2	0.0974785	-0.0346889	10	10	P1P2	0.820228	-0.0110134	9	9
ATP5I	P1P2	0.843498	-0.178428	7	7	P1P2	0.544408	-0.113182	7	7	P1P2	0.337644	-0.0554012	6	6
ATP5J	P1P2	0.411163	0.0307334	9	9	P1P2	0.0929568	0.176556	9	9	P1P2	0.0495309	0.0416093	9	9
ATP5J2	P1P2	0.493433	-0.0447409	8	8	P1P2	0.339097	-0.126722	9	9	P1P2	0.465386	-0.0857313	8	8
ATP5J2-PTCD1	P2	0.198045	-0.0425313	3	3	P1	0.339097	-0.126722	9	9	P2	0.16293	-0.039406	3	3
ATP5L	P1P2	0.17202	0.0953173	5	5	P1P2	0.226062	-0.189633	7	7	P1P2	0.787631	0.0469136	5	5
ATP5L2	ENST00000505920.1	0.456373	0.0489374	10	10	ENST00000505920.1	0.360036	0.0684501	10	10	ENST00000505920.1	0.258668	0.0884041	10	10
ATP5O	P1P2	0.566529	0.0509894	6	6	P1P2	0.0814681	0.275143	7	7	P1P2	0.110202	0.052429	6	6
ATP5S	P1P2	0.550593	-0.120965	10	10	P1P2	0.15845	0.121364	9	9	P1P2	0.0450696	0.10195	9	9
ATP5SL	P1P2	0.00122131	0.178535	7	7	P1P2	0.211328	0.0585631	7	7	P1P2	0.00561167	0.139722	7	7
ATP6AP1	P1P2	0.0496272	0.346507	5	5	P1P2	0.00596459	0.4712	8	8	P1P2	0.0311862	0.349655	5	5
ATP6AP1L	P1P2	0.132657	0.11775	10	10	P1P2	0.757308	0.0545434	10	10	P1P2	0.335296	0.0651716	10	10
ATP6AP2	P1P2	0.126698	0.0463623	8	8	P1P2	0.675908	-0.0330355	8	8	P1P2	0.13769	0.0273093	7	7
ATP6V0A1	P1P2	0.297509	-0.15946	10	10	P1P2	0.849083	0.0346112	10	10	P1P2	0.491238	-0.0376255	10	10
ATP6V0A2	P1P2	0.570806	-0.0332814	10	10	P1P2	0.893162	0.00331156	10	10	P1P2	0.934895	0.0208411	10	10
ATP6V0A4	P2	0.17551	-0.0986079	10	10	P1	0.0679109	-0.0370671	10	10	P2	0.043265	-0.0515895	10	10
ATP6V0B	P1P2	0.492637	0.0977755	9	9	P1P2	0.674516	0.0789899	10	10	P1P2	0.791915	0.0828271	9	9
ATP6V0C	P1P2	0.717797	0.228703	10	10	P1P2	0.335447	-0.0603163	10	10	P1P2	0.649329	0.091316	10	10
ATP6V0D1	P1P2	0.00740115	0.256086	10	10	P1P2	0.307906	0.197749	10	10	P1P2	0.00203748	0.161958	10	10
ATP6V0D2	P1P2	0.40873	-0.143929	10	10	P1P2	0.526239	-0.000988617	10	10	P1P2	0.399328	-0.0758313	10	10
ATP6V0E1	P1P2	0.966044	0.0236288	10	10	P1P2	0.332507	-0.0506481	10	10	P1P2	0.432278	-0.0308603	10	10
ATP6V0E2	P1P2	0.427766	-0.0417931	9	9	P1P2	0.0392656	-0.130364	9	9	P1P2	0.065646	-0.0992979	9	9
ATP6V1A	P1P2	0.734314	0.0986687	4	4	P1P2	0.184375	0.108104	7	7	P1P2	0.354464	0.0696184	4	4
ATP6V1B1	P1P2	0.987263	0.0318683	10	10	P1P2	0.94342	0.02615	10	10	P1P2	0.779893	0.0364199	10	10
ATP6V1B2	P1P2	0.708082	-0.0381502	5	5	P1P2	0.283293	-0.105933	6	6	P1P2	0.326364	0.0704278	5	5
ATP6V1C1	P1P2	0.0706793	0.252351	5	5	P1P2	0.194049	0.0370539	8	8	P1P2	0.111292	0.121003	5	5
ATP6V1C2	P1P2	0.931445	-0.0343096	10	10	P1P2	0.355887	-0.0908917	10	10	P1P2	0.354219	-0.0548307	10	10
ATP6V1D	P1P2	0.905166	-0.022217	10	10	P1P2	0.406333	0.037444	10	10	P1P2	0.603942	0.11443	10	10
ATP6V1E1	P1P2	0.19907	-0.0819046	10	10	P1P2	0.72929	0.123082	9	9	P1P2	0.595141	0.0302961	9	9
ATP6V1E2	P1P2	0.730764	-0.0756825	10	10	P1P2	0.761559	-0.222034	10	10	P1P2	0.902654	-0.182842	10	10
ATP6V1F	P1P2	0.524749	-0.0609571	10	10	P1P2	0.841031	0.0589299	10	10	P1P2	0.796322	-0.0470588	10	10
ATP6V1G1	P1P2	0.156311	-0.0504139	9	9	P1P2	0.232762	0.0737333	9	9	P1P2	0.149841	0.0862148	9	9
ATP6V1G2	P1P2	0.297852	0.088511	10	10	P1P2	0.866966	0.0296207	10	10	P1P2	0.469113	0.0236288	10	10
ATP6V1G3	P1P2	0.52319	-0.0537664	9	9	P1P2	0.0142294	0.267413	10	10	P1P2	0.216468	0.109937	9	9
ATP6V1H	P1P2	0.0118319	0.1354	10	10	P1P2	0.264603	0.0658135	10	10	P1P2	0.0581935	0.132749	10	10
ATP7A	P1P2	0.488063	-0.0355866	10	10	P1P2	0.490449	0.0119514	10	10	P1P2	0.857052	-0.041249	10	10
ATP7B	P1P2	0.8937	-0.113364	10	10	P1P2	0.74816	0.356487	10	10	P1P2	0.565641	0.116844	10	10
ATP8A1	P1P2	0.98573	0.0234792	10	10	P1P2	0.228292	0.105406	10	10	P1P2	0.296004	0.0458973	10	10
ATP8A2	P1P2	0.498978	0.068594	10	10	P1P2	0.728645	-0.027819	10	10	P1P2	0.495729	0.0429888	10	10
ATP8B1	P1P2	0.396683	-0.0218407	9	9	P1P2	0.142502	0.00928456	9	9	P1P2	0.32418	0.0248776	9	9
ATP8B2	P2	0.214626	-0.0504391	8	8	P1	0.0425969	0.155544	10	10	P1	0.0413976	0.141018	10	10
ATP8B3	P1P2	0.384607	0.0599891	10	10	P1P2	0.818349	0.0404774	10	10	P1P2	0.656814	0.0326274	10	10
ATP8B4	P1P2	0.741237	0.00112954	10	10	P1P2	0.283485	-0.0412799	10	10	P1P2	0.521973	-0.0134617	10	10
ATP9A	P1P2	0.438557	-0.0273012	9	9	P1P2	0.453489	0.109501	9	9	P1P2	0.887888	0.0291612	9	9
ATP9B	P1P2	0.00316344	-0.252998	10	10	P1P2	0.692751	-0.00689902	10	10	P1P2	0.0292742	-0.115846	10	10
ATPAF1	P1P2	0.598533	-0.0478416	10	10	P1P2	0.610337	0.238639	10	10	P1P2	0.603736	0.0575431	10	10
ATPAF2	P1P2	0.238237	0.063898	10	10	P1P2	0.315213	0.0990842	10	10	P1P2	0.152829	0.0762706	10	10
ATPIF1	P1P2	0.425772	-0.025843	9	9	P1P2	0.845368	-0.0374197	9	9	P1P2	0.458794	-0.0188919	9	9
ATR	P1P2	0.357268	0.075034	3	3	P1P2	0.364976	-0.230579	6	6	P1P2	0.79772	-0.039175	3	3
ATRAID	P1P2	0.611429	-0.0532723	10	10	P1P2	0.730412	0.110591	10	10	P1P2	0.958972	-0.0328688	10	10
ATRIP	P1P2	0.67873	-0.0718241	9	9	P1P2	0.00671567	0.336079	10	10	P1P2	0.00256522	0.171367	9	9
ATRN	P1P2	0.972279	0.0462429	9	9	P1P2	0.524897	0.0607022	10	10	P1P2	0.948408	0.0133596	9	9
ATRNL1	P1P2	0.134494	0.0258047	10	10	P1P2	0.84425	-0.098773	10	10	P1P2	0.447551	-0.013274	10	10
ATRX	P1P2	0.0351104	-0.00455538	10	10	P1P2	0.141006	0.194688	10	10	P1P2	0.719653	0.0472327	10	10
ATXN1	P1P2	0.592898	0.174798	10	10	P1P2	0.024414	0.234608	10	10	P1P2	0.0151225	0.192184	10	10
[truncated: 36,537 more rows]
